# Supplementary material for: Microglia show differential transcriptomic response to Aβ peptide aggregates ex vivo and in vivo
Source: PubMed Central journal article supplement (PMC8321667; doi:10.26508/lsa.202101108), 2021-06-14
Supplement: LSA-2021-01108_review_history.pdf [file LSA-2021-01108_review_history.pdf]

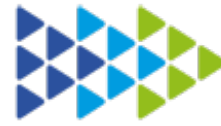

Life Science Alliance

# Microglia show differential transcriptomic response to A $\beta$ peptide aggregates ex vivo and in vivo

Karen McFarland, Carolina Ceballos, Awilda Rosario, Thomas Ladd, Brenda Moore, Griffin Golde, Xue Wang, Mariet Allen, Nilufer Ertekin-Taner, Cory Funk, Max Robinson, Priyanka Baloni, Noa Rappaport, Paramita Chakrabarty, and Todd Golde

DOI: <https://doi.org/10.26508/lsa.202101108>

*Corresponding author(s): Karen McFarland, University of Florida and Todd Golde, University of Florida*

---

## Review Timeline:

|                     |            |
|---------------------|------------|
| Submission Date:    | 2021-04-26 |
| Editorial Decision: | 2021-05-20 |
| Revision Received:  | 2021-05-27 |
| Accepted:           | 2021-05-28 |

---

*Scientific Editor: Shachi Bhatt*

## Transaction Report:

(Note: With the exception of the correction of typographical or spelling errors that could be a source of ambiguity, letters and reports are not edited. The original formatting of letters and referee reports may not be reflected in this compilation.)

Please note that the manuscript was previously reviewed at another journal and the reports were taken into account in the decision-making process at Life Science Alliance.

May 20, 2021

RE: Life Science Alliance Manuscript #LSA-2021-01108-T

Karen N. McFarland  
University of Florida  
Neurology  
1179 S Newell Dr, L3-100  
Gainesville, FL 32610

Dear Dr. McFarland,

Thank you for submitting your revised manuscript entitled "Microglia show differential transcriptomic response to A $\beta$  peptide aggregates ex vivo and in vivo". We would be happy to publish your paper in Life Science Alliance (LSA) pending minor text-based revisions mentioned below and final revisions necessary to meet our formatting guidelines.

For a brief overview, the manuscript was previously reviewed at a LSA partner journal, and the authors transferred the manuscript, along with the referee reports to LSA. At LSA, the manuscript and reviewer reports were assessed by both in-house editors and academic experts, who agreed that the dataset provided in the study was high quality and would be a valuable resource for the research community. The authors responses to the 2 points of concerns raised by the LSA editors (sent with the decision letter from the partner journal) were also sufficiently addressed by the authors. Thus, we would like to invite you to submit a final revision of this manuscript that includes the following minor edits:

- + We understand the argument that the authors have made in response to the concern from Rev 3 pt 2 about the 'cleanliness' of the oligomeric vs fibrillar preparations. We encourage the authors to discuss the caveats about this experiment in the manuscript, similar to what they included in the response
- + the minor revisions requested by the reviewers should be addressed in the revised manuscript

Along with the points listed above, we also encourage the authors to edit the following to meet the journal's formatting guidelines:

- please add a Summary Blurb/Alternate Abstract in our system
- please add Keywords and a Category for your manuscript in our system
- please add ORCID ID for secondary corresponding author-they should have received instructions on how to do so
- please consult our manuscript preparation guidelines <https://www.life-science-alliance.org/manuscript-prep> and make sure your manuscript sections are in the correct order
- please add your main, supplementary figure, and table legends to the main manuscript text after the references section
- please make sure the manuscript sections are aligned in accordance with LSA's formatting guidelines: please separate the Figure legends and Supplemental Figure legends into separate sections
- please add an Author Contributions section to your main manuscript text

- please add a conflict of interest statement to your main manuscript text
- we encourage you to revise the figure legends for figures 7 and S1 such that the figure panels are introduced in an alphabetical order
- there is a callout for Figure S3A and B although there is no legend for it nor the actual figure has been provided
- please add callouts for Figures 7B, C, and 8F-H to your main manuscript text
- please provide higher resolution higher quality images for the blots shown in Figure 1

If you are planning a press release on your work, please inform us immediately to allow informing our production team and scheduling a release date.

To upload the final version of your manuscript, please log in to your account:

<https://lsa.msubmit.net/cgi-bin/main.plex>

You will be guided to complete the submission of your revised manuscript and to fill in all necessary information. Please get in touch in case you do not know or remember your login name.

To avoid unnecessary delays in the acceptance and publication of your paper, please read the following information carefully.

#### A. FINAL FILES:

These items are required for acceptance.

-- An editable version of the final text (.DOC or .DOCX) is needed for copyediting (no PDFs).

-- High-resolution figure, supplementary figure and video files uploaded as individual files: See our detailed guidelines for preparing your production-ready images, <https://www.life-science-alliance.org/authors>

-- Summary blurb (enter in submission system): A short text summarizing in a single sentence the study (max. 200 characters including spaces). This text is used in conjunction with the titles of papers, hence should be informative and complementary to the title. It should describe the context and significance of the findings for a general readership; it should be written in the present tense and refer to the work in the third person. Author names should not be mentioned.

#### B. MANUSCRIPT ORGANIZATION AND FORMATTING:

Full guidelines are available on our Instructions for Authors page, <https://www.life-science-alliance.org/authors>

We encourage our authors to provide original source data, particularly uncropped/-processed electrophoretic blots and spreadsheets for the main figures of the manuscript. If you would like to add source data, we would welcome one PDF/Excel-file per figure for this information. These files will be linked online as supplementary "Source Data" files.

**\*\*Submission of a paper that does not conform to Life Science Alliance guidelines will delay the acceptance of your manuscript.\*\***

**\*\*It is Life Science Alliance policy that if requested, original data images must be made available to**

the editors. Failure to provide original images upon request will result in unavoidable delays in publication. Please ensure that you have access to all original data images prior to final submission.\*\*

\*\*The license to publish form must be signed before your manuscript can be sent to production. A link to the electronic license to publish form will be sent to the corresponding author only. Please take a moment to check your funder requirements.\*\*

\*\*Reviews, decision letters, and point-by-point responses associated with peer-review at Life Science Alliance will be published online, alongside the manuscript. If you do want to opt out of having the reviewer reports and your point-by-point responses displayed, please let us know immediately.\*\*

Thank you for your attention to these final processing requirements. Please revise and format the manuscript and upload materials within 7 days.

Thank you for this interesting contribution, we look forward to publishing your paper in Life Science Alliance.

Sincerely,

Shachi Bhatt, Ph.D.  
Executive Editor  
Life Science Alliance  
<http://www.lsajournal.org>  
Tweet @SciBhatt @LSAJournal

-----

We have addressed the minor comments from the reviewers as requested:

*Referee #2, Minor comment 1:* Line 173, figure 3, authors cut the hierarchical tree at a height of 5.75. The authors should explain why they chose this value.

**Response:** Within the text, we have added our rationale for choosing to cut the tree at a height of 5.75.

*Referee #2, Minor comment 2:* Figure 7 and figure 8 are mis-referenced in the text. For instance, Figure 7 D in line 276 should rather be figure 7B.

**Response:** We thank the referees for their careful reading of our manuscript. This callouts in the manuscript for the panels in this figure have been corrected.

*Referee #2, Minor comment 3:* Line 372, "however we would note that both oA $\beta$  and fA $\beta$  induce massive changes in the transcriptome of microglia and certainly lend little credence to claims by some in the field that fA $\beta$  is inert". Original publication should be cited.

**Response:** We have added the reference within the text as requested.

*Referee #3, Minor comment 1:* The introduction states that 'Yet, despite intensive study, the precise mechanism by which accumulation of A $\beta$  aggregates trigger the degenerative phase of the disease is not well understood.' but this is not being illuminated in the current study.

**Response:** In the phrasing of this statement within the first paragraph of our introduction, we were merely setting the stage for the basis of these experiments.

*Referee #3, Minor comment 2:* While I understand that a colour coding is being used for modules, I find this confusing (or better: not informative) when only the colour coding is used in the main text: See lines 197-199: 'These modules include antiquewhite4, brown, coral1, darkseagreen4, honeydew1, lavenderblush3, lightcoral, lightcyan, lightcyan1, lightgreen, lightsteelblue1, orangered3, orangered4, saddlebrown, violet, white and yellow4.'

**Response:** WGCNA modules are originally identified by numbering the modules from largest to smallest based on the number of genes each contains. Typically, WGCNA modules are then named by color which makes for easier visualization. We are doubtful that referring to the modules by number instead of color will be any less confusing.

*Referee #3, Minor comment 3:* The figure legends are interspersed by Suppl Fig 1 and Table 2. Please move further down.

**Response:** We have separated the Supplemental figure legends and the table legends from the main figure legends.

*Referee #3, Minor comment 4:* I do not find Fig 1A very informative (nor aesthetically appealing). The filaments do not really look like beautiful Abeta filaments (with their typical periodicity). Fig. 1B needs to be complemented by negative contrast electron microscopy.

**Response:** We have removed figure 1A and placed the remaining portion of figure 1b as supplemental figure 1 (renaming the remaining figure within the text and legends). The preparations of oligomeric and fibrillar amyloid peptide that we use for these studies are ones that are commonly used in many other laboratories with previously published, detailed methodology for their preparation as referenced in the manuscript (Stine, 2003).

*Referee #3, Minor comment 5:* FPKM (only used in the panels of Fig 7) is a term/acronym that not everyone knows. It should be introduced in the legend/main text and then be explained.

**Response:** We have included the definition of FPKM in the figure legend for Figure 7 (now figure 6).

Please let us know if there is any additional information or changes that you require.

We look forward to the publication of our manuscript in Life Science Alliance.

Best,

Karen N McFarland, PhD

Todd E Golde, MD, PhD

May 28, 2021

RE: Life Science Alliance Manuscript #LSA-2021-01108-TR

Karen N. McFarland  
University of Florida  
Neurology  
1179 S Newell Dr, L3-100  
Gainesville, FL 32610

Dear Dr. McFarland,

Thank you for submitting your Research Article entitled "Microglia show differential transcriptomic response to A $\beta$  peptide aggregates ex vivo and in vivo". It is a pleasure to let you know that your manuscript is now accepted for publication in Life Science Alliance. Congratulations on this interesting work.

The final published version of your manuscript will be deposited by us to PubMed Central upon online publication.

Your manuscript will now progress through copyediting and proofing. It is journal policy that authors provide original data upon request.

Reviews, decision letters, and point-by-point responses associated with peer-review at Life Science Alliance will be published online, alongside the manuscript. If you do want to opt out of having the reviewer reports and your point-by-point responses displayed, please let us know immediately.

\*\*\*IMPORTANT: If you will be unreachable at any time, please provide us with the email address of an alternate author. Failure to respond to routine queries may lead to unavoidable delays in publication.\*\*\*

Scheduling details will be available from our production department. You will receive proofs shortly before the publication date. Only essential corrections can be made at the proof stage so if there are any minor final changes you wish to make to the manuscript, please let the journal office know now.

#### DISTRIBUTION OF MATERIALS:

Authors are required to distribute freely any materials used in experiments published in Life Science Alliance. Authors are encouraged to deposit materials used in their studies to the appropriate repositories for distribution to researchers.

You can contact the journal office with any questions, contact [contact@life-science-alliance.org](mailto:contact@life-science-alliance.org)

Again, congratulations on a very nice paper. I hope you found the review process to be constructive and are pleased with how the manuscript was handled editorially. We look forward to future exciting submissions from your lab.

Sincerely,

Shachi Bhatt, Ph.D.

Executive Editor

Life Science Alliance

<http://www.lsjournal.org>

Tweet @SciBhatt @LSAJournal
