# Supplementary material for: Microglia show differential transcriptomic response to Aβ peptide aggregates ex vivo and in vivo
Source: Life Sci Alliance. 2021 Jun 14;4(7):e202101108. doi: 10.26508/lsa.202101108 (PMC8321667; doi:10.26508/lsa.202101108)
Supplement: Supplementary file 1 [file LSA-2021-01108_TableS1.xlsx]

## Sheet: 1_DEGs_fibrils_1hr_v_control
GeneStableID	symbol	entrezid	baseMean	log2FoldChange	lfcSE	stat	pvalue	padj
ENSMUSG00000042677	Zc3h12a	230738	1125.08	3.41607	0.0862889	39.5887	0	0
ENSMUSG00000021990	Spata13	219140	3022.01	2.19088	0.0508323	43.1001	0	0
ENSMUSG00000063234	Gpr84	80910	9112.35	4.06094	0.0750989	54.0746	0	0
ENSMUSG00000035356	Nfkbiz	80859	8349.15	4.63128	0.0672464	68.8704	0	0
ENSMUSG00000030142	Clec4e	56619	14627.1	3.31443	0.0817466	40.5452	0	0
ENSMUSG00000027995	Tlr2	24088	27560.2	2.652	0.0615497	43.0871	0	0
ENSMUSG00000044786	Zfp36	22695	5913.48	2.71245	0.0581052	46.6818	0	0
ENSMUSG00000035678	Tnfsf9	21950	1008.57	4.88009	0.117821	41.4194	0	0
ENSMUSG00000019850	Tnfaip3	21929	7800.85	3.77178	0.0707581	53.3053	0	0
ENSMUSG00000024401	Tnf	21926	9297.32	7.60458	0.133933	56.7789	0	0
ENSMUSG00000019970	Sgk1	20393	13060.1	2.09591	0.0401358	52.2204	0	0
ENSMUSG00000058427	Cxcl2	20310	5515.49	7.08457	0.166935	42.439	0	0
ENSMUSG00000028525	Pde4b	18578	4270.89	3.10037	0.0670687	46.2269	0	0
ENSMUSG00000021025	Nfkbia	18035	12757.9	3.70628	0.0633286	58.5246	0	0
ENSMUSG00000047945	Marcksl1	17357	22966.7	3.05506	0.0746212	40.9409	0	0
ENSMUSG00000020644	Id2	15902	10387.8	1.51436	0.0375629	40.3153	0	0
ENSMUSG00000015396	Cd83	12522	20628	1.68399	0.043035	39.1306	0	0
ENSMUSG00000051439	Cd14	12475	59699.2	2.27831	0.0510667	44.6144	0	0
ENSMUSG00000027660	Skil	20482	6190.46	1.7962	0.0490043	36.654	3.95173e-294	3.54179e-291
ENSMUSG00000025993	Slc40a1	53945	35927.5	-1.37682	0.0381548	-36.0852	3.86994e-285	3.29506e-282
ENSMUSG00000027276	Jag1	16449	5370.03	2.21573	0.0617651	35.8734	7.93055e-282	6.43092e-279
ENSMUSG00000052837	Junb	16477	9553.75	2.79311	0.0787237	35.4799	1.0047e-275	7.77681e-273
ENSMUSG00000001542	Ell2	192657	6002.93	1.70564	0.0483547	35.2736	1.49366e-272	1.10589e-269
ENSMUSG00000020017	Hal	15109	3622.59	1.89559	0.0541624	34.9982	2.3972e-268	1.70091e-265
ENSMUSG00000036931	Nfkbid	243910	1371.92	3.52677	0.102705	34.3388	2.06786e-258	1.40854e-255
ENSMUSG00000027399	Il1a	16175	2133.33	3.83583	0.112826	33.9978	2.40188e-253	1.57314e-250
ENSMUSG00000043953	Ccrl2	54199	3840.04	3.23135	0.0959626	33.673	1.43525e-248	9.05216e-246
ENSMUSG00000037405	Icam1	15894	8196.66	2.58635	0.0772916	33.4623	1.70535e-245	1.03715e-242
ENSMUSG00000028680	Plk3	12795	1659.94	2.01623	0.0620333	32.5025	9.84083e-232	5.7786e-229
ENSMUSG00000006818	Sod2	20656	22006.5	1.84725	0.0580297	31.8329	2.26935e-222	1.2466e-219
ENSMUSG00000044162	Tnip3	414084	1549.73	2.96746	0.0932636	31.818	3.64502e-222	1.93972e-219
ENSMUSG00000029380	Cxcl1	14825	960.043	8.10599	0.257647	31.4616	2.91424e-217	1.50383e-214
ENSMUSG00000001627	Ifrd1	15982	2988.23	1.63203	0.051879	31.4584	3.22429e-217	1.6149e-214
ENSMUSG00000021591	Glrx	93692	9749.49	1.41977	0.0459272	30.9136	7.84994e-210	3.81933e-207
ENSMUSG00000000489	Pdgfb	18591	1825.57	1.83182	0.0594623	30.8065	2.14515e-208	1.01472e-205
ENSMUSG00000000555	Itga5	16402	8229.19	1.39426	0.0457141	30.4996	2.63998e-204	1.21503e-201
ENSMUSG00000020077	Srgn	19073	5597.82	1.41418	0.0466474	30.3164	6.97651e-202	3.12639e-199
ENSMUSG00000021281	Tnfaip2	21928	25168.2	1.96322	0.0649326	30.2347	8.28993e-201	3.61972e-198
ENSMUSG00000005413	Hmox1	15368	86570.6	1.69541	0.0570659	29.7098	5.74156e-194	2.44432e-191
ENSMUSG00000085148	Mir22hg	100042498	1495.28	1.82769	0.0620408	29.4594	9.53095e-191	3.9586e-188
ENSMUSG00000022126	Acod1	16365	13277.6	7.31201	0.249835	29.2674	2.70035e-188	1.09486e-185
ENSMUSG00000023947	Nfkbie	18037	3125.83	2.58902	0.0886396	29.2084	1.51697e-187	6.00757e-185
ENSMUSG00000055435	Maf	17132	5240.5	-1.42769	0.0494132	-28.8929	1.46786e-183	5.68095e-181
ENSMUSG00000018920	Cxcl16	66102	13421.8	0.912702	0.0317534	28.7434	1.09525e-181	4.14468e-179
ENSMUSG00000015837	Sqstm1	18412	52580.3	0.850228	0.0296587	28.6671	9.809e-181	3.63125e-178
ENSMUSG00000015312	Gadd45b	17873	747.544	3.00236	0.106357	28.2292	2.56182e-175	9.28197e-173
ENSMUSG00000053113	Socs3	12702	3591.04	4.4288	0.157432	28.1315	4.03564e-174	1.43173e-171
ENSMUSG00000040435	Ppp1r15a	17872	2983.43	1.42997	0.0515461	27.7415	2.20637e-169	7.66782e-167
ENSMUSG00000026390	Marco	17167	56707.4	1.87728	0.0679803	27.615	7.34567e-168	2.50179e-165
ENSMUSG00000032691	Nlrp3	216799	3137.58	2.40313	0.0871082	27.5878	1.55764e-167	5.20099e-165
ENSMUSG00000025161	Slc16a3	80879	5307.83	1.62501	0.0591007	27.4956	1.97903e-166	6.48094e-164
ENSMUSG00000038393	Txnip	56338	15744.1	-1.08264	0.0397398	-27.2431	2.00354e-163	6.4374e-161
ENSMUSG00000038151	Prdm1	12142	2708.61	1.78539	0.0655988	27.2168	4.1113e-163	1.29651e-160
ENSMUSG00000018899	Irf1	16362	6042.53	2.04458	0.0752295	27.1779	1.18579e-162	3.67143e-160
ENSMUSG00000029379	Cxcl3	330122	702.237	5.37691	0.200626	26.8007	3.17259e-158	9.64749e-156
ENSMUSG00000027398	Il1b	16176	3655.4	6.10041	0.227988	26.7576	1.00671e-157	3.00759e-155
ENSMUSG00000044258	Ctla2a	13024	1903.23	1.75148	0.0660936	26.5	9.70236e-155	2.84865e-152
ENSMUSG00000050370	Ch25h	12642	2323.31	2.32518	0.0880441	26.4093	1.07139e-153	3.09234e-151
ENSMUSG00000053175	Bcl3	12051	1466	2.16952	0.0823054	26.3594	4.00572e-153	1.13689e-150
ENSMUSG00000032000	Birc3	11796	4031.82	1.69855	0.0644719	26.3457	5.75619e-153	1.60692e-150
ENSMUSG00000022895	Ets2	23872	7091.88	1.91309	0.0730076	26.204	2.39147e-151	6.56845e-149
ENSMUSG00000024235	Map3k8	26410	1510.02	1.61061	0.0614758	26.199	2.72481e-151	7.3652e-149
ENSMUSG00000039942	Ptger4	19219	4511.19	1.9732	0.0763495	25.8444	2.81446e-147	7.48866e-145
ENSMUSG00000062070	Pgk1	18655	17576.5	1.04634	0.0405589	25.7979	9.34974e-147	2.44949e-144
ENSMUSG00000016559	H3f3b	15081	34024.4	1.05992	0.0415304	25.5216	1.13459e-143	2.92741e-141
ENSMUSG00000001473	Tubb6	67951	6072.9	1.13077	0.044389	25.4742	3.80909e-143	9.68133e-141
ENSMUSG00000039934	Gsap	212167	6264.12	1.18239	0.0466796	25.33	1.49436e-141	3.74228e-139
ENSMUSG00000029915	Clec5a	23845	4333.89	1.68834	0.0673261	25.0771	8.84643e-139	2.18327e-136
ENSMUSG00000028793	Rnf19b	75234	5755.24	1.47364	0.0588266	25.0505	1.72438e-138	4.19494e-136
ENSMUSG00000036067	Slc2a6	227659	5770.43	1.78327	0.0716108	24.9023	7.02727e-137	1.68546e-134
ENSMUSG00000000732	Icosl	50723	2848.82	2.1526	0.0872726	24.6652	2.52749e-134	5.97786e-132
ENSMUSG00000022951	Rcan1	54720	2239.74	1.48718	0.0606543	24.5189	9.28138e-133	2.1651e-130
ENSMUSG00000032487	Ptgs2	19225	482.772	4.03866	0.165846	24.3519	5.53477e-131	1.27367e-128
ENSMUSG00000020423	Btg2	12227	2311.68	1.37684	0.0565749	24.3366	8.03766e-131	1.82498e-128
ENSMUSG00000047407	Tgif1	21815	5170.92	0.926076	0.0382	24.2428	7.87342e-130	1.76416e-127
ENSMUSG00000066632	Pgk1-rs7	668435	10275.5	1.05203	0.0435997	24.1293	1.23313e-128	2.72713e-126
ENSMUSG00000037820	Tgm2	21817	2575.46	1.93129	0.0802206	24.0747	4.60414e-128	1.00518e-125
ENSMUSG00000021250	Fos	14281	1473.82	1.97139	0.0822126	23.9791	4.59137e-127	9.89701e-125
ENSMUSG00000069008	Gm5537	433594	9927.48	1.05113	0.0448523	23.4355	1.85965e-121	3.9585e-119
ENSMUSG00000031167	Rbm3	19652	4082.55	1.04346	0.0446433	23.3732	8.01393e-121	1.68481e-118
ENSMUSG00000011752	Pgam1	18648	33738.7	0.738115	0.031638	23.33	2.19879e-120	4.56625e-118
ENSMUSG00000042688	Mapk6	50772	4226.45	1.14998	0.0495242	23.2206	2.81753e-119	5.78069e-117
ENSMUSG00000025203	Scd2	20250	5748.47	1.48887	0.0645643	23.0603	1.15947e-117	2.35054e-115
ENSMUSG00000029373	Pf4	56744	17259	0.919491	0.039985	22.9959	5.1228e-117	1.02631e-114
ENSMUSG00000032802	Srxn1	76650	12170.6	1.59302	0.0693763	22.962	1.11759e-116	2.21296e-114
ENSMUSG00000003420	Fcgrt	14132	7981.67	-0.948008	0.0413813	-22.9091	3.77149e-116	7.38215e-114
ENSMUSG00000042265	Trem1	58217	302.965	3.47174	0.151595	22.9014	4.49538e-116	8.69907e-114
ENSMUSG00000031504	Rab20	19332	3609.84	1.51956	0.0666468	22.8001	4.57021e-115	8.7445e-113
ENSMUSG00000046223	Plaur	18793	2088.23	1.81645	0.0797947	22.764	1.04235e-114	1.97223e-112
ENSMUSG00000026712	Mrc1	17533	19280.6	-1.04028	0.0461623	-22.5352	1.87628e-112	3.51112e-110
ENSMUSG00000028645	Slc2a1	20525	4873.44	1.38459	0.0616098	22.4736	7.53001e-112	1.39379e-109
ENSMUSG00000069892	9930111J21Rik2	245240	7986.89	-1.62861	0.0730086	-22.3072	3.14895e-110	5.76596e-108
ENSMUSG00000025473	Adam8	11501	43181	0.688226	0.0309039	22.2699	7.23734e-110	1.31111e-107
ENSMUSG00000026819	Slc25a25	227731	1237.2	1.51225	0.068347	22.1261	1.77449e-108	3.18081e-106
ENSMUSG00000003541	Ier3	15937	5768.35	2.88403	0.13043	22.1117	2.43802e-108	4.3247e-106
ENSMUSG00000030156	Cd69	12515	1125.03	6.02654	0.272996	22.0756	5.42841e-108	9.52994e-106
ENSMUSG00000011179	Odc1	18263	2127.25	1.89376	0.0861318	21.9867	3.85936e-107	6.70623e-105
ENSMUSG00000024663	Rab3il1	74760	7795.82	-0.837812	0.0381196	-21.9785	4.62271e-107	7.95152e-105
ENSMUSG00000032193	Ldlr	16835	3389.58	1.16725	0.05317	21.9532	8.06563e-107	1.3735e-104
ENSMUSG00000053560	Ier2	15936	2005.21	1.4723	0.067474	21.8203	1.48961e-105	2.51154e-103
ENSMUSG00000033917	Gde1	56209	6077.76	0.879857	0.0404909	21.7297	1.0746e-104	1.79406e-102
ENSMUSG00000076441	Ass1	11898	1029.79	3.00103	0.13845	21.6759	3.46473e-104	5.72824e-102
ENSMUSG00000069893	9930111J21Rik1	667214	6825	-1.58194	0.0730277	-21.6622	4.6617e-104	7.63308e-102
ENSMUSG00000000290	Itgb2	16414	34314.8	0.581732	0.0269719	21.5681	3.58435e-103	5.81314e-101
ENSMUSG00000042364	Snx18	170625	10666.2	0.884202	0.0410502	21.5395	6.63815e-103	1.06643e-100
ENSMUSG00000002983	Relb	19698	4178.47	1.38422	0.0645983	21.428	7.31986e-102	1.16495e-99
ENSMUSG00000047959	Kcna3	16491	347.452	2.67734	0.126586	21.1504	2.73655e-99	4.31489e-97
ENSMUSG00000037242	Clic4	29876	25512.5	0.801768	0.0382481	20.9623	1.44867e-97	2.26325e-95
ENSMUSG00000036478	Btg1	12226	8945.37	0.935479	0.0446929	20.9313	2.7791e-97	4.3023e-95
ENSMUSG00000022246	Rai14	75646	1961.52	1.28726	0.0616211	20.8899	6.61492e-97	1.01482e-94
ENSMUSG00000063229	Ldha	16828	40996.4	0.777142	0.0372337	20.872	9.61657e-97	1.46215e-94
ENSMUSG00000000982	Ccl3	20302	5288.33	1.66231	0.0798538	20.8169	3.04346e-96	4.58647e-94
ENSMUSG00000001741	Il16	16170	1176.88	-1.29665	0.0623277	-20.8037	4.00876e-96	5.98817e-94
ENSMUSG00000064373	Selenop	20363	76434.7	-1.33381	0.0642242	-20.768	8.43432e-96	1.24894e-93
ENSMUSG00000022901	Cd86	12524	2359.68	1.32247	0.0637976	20.7292	1.89078e-95	2.7757e-93
ENSMUSG00000048234	Rnf149	67702	11851	0.929316	0.0448797	20.7069	3.0047e-95	4.37326e-93
ENSMUSG00000027368	Dusp2	13537	188.568	5.35484	0.259301	20.651	9.55322e-95	1.37866e-92
ENSMUSG00000017132	Cyth1	19157	7381.41	1.10035	0.053294	20.6468	1.04391e-94	1.49384e-92
ENSMUSG00000032294	Pkm	18746	88613.5	0.763187	0.0370261	20.6122	2.13486e-94	3.02954e-92
ENSMUSG00000028124	Gclm	14630	14014.8	1.04529	0.0508271	20.5656	5.58015e-94	7.85325e-92
ENSMUSG00000031903	Pla2g15	192654	19033.1	-0.778226	0.0380175	-20.4702	3.96933e-93	5.54046e-91
ENSMUSG00000030103	Bhlhe40	20893	1535.25	1.40658	0.0688498	20.4297	9.11479e-93	1.26192e-90
ENSMUSG00000026821	Ralgds	19730	5427.31	1.84869	0.0906913	20.3844	2.29825e-92	3.1562e-90
ENSMUSG00000039232	Stx11	74732	683.409	2.57454	0.126853	20.2954	1.41064e-91	1.92174e-89
ENSMUSG00000057666	Gapdh	14433	57196.5	0.786253	0.0390256	20.1471	2.8541e-90	3.85734e-88
ENSMUSG00000029580	Actb	11461	114427	0.742182	0.0368515	20.1398	3.30407e-90	4.43032e-88
ENSMUSG00000060477	Irak2	108960	8765.16	1.05713	0.0525608	20.1126	5.72793e-90	7.62038e-88
ENSMUSG00000020334	Slc22a4	30805	855.566	1.71804	0.0854654	20.1021	7.07052e-90	9.33363e-88
ENSMUSG00000035671	Zswim4	212168	1902.67	1.24219	0.0619429	20.0538	1.86991e-89	2.44944e-87
ENSMUSG00000016528	Mapkapk2	17164	20787.1	0.905353	0.0452653	20.001	5.39372e-89	7.01143e-87
ENSMUSG00000064289	Tank	21353	3421.77	0.94289	0.0471765	19.9864	7.23001e-89	9.32725e-87
ENSMUSG00000024190	Dusp1	19252	821.83	1.74078	0.0873219	19.9352	2.01404e-88	2.57872e-86
ENSMUSG00000062825	Actg1	11465	67125.2	0.704184	0.0356126	19.7734	5.04192e-87	6.40738e-85
ENSMUSG00000034247	Plekhm1	353047	9265.85	-0.888458	0.0453758	-19.58	2.29109e-85	2.89e-83
ENSMUSG00000050737	Ptges	64292	953.225	2.8902	0.147749	19.5616	3.2835e-85	4.11138e-83
ENSMUSG00000050721	Plekho2	102595	15999.2	0.593558	0.030363	19.5488	4.22658e-85	5.25361e-83
ENSMUSG00000030201	Lrp6	16974	5356.3	-1.08766	0.0556438	-19.5469	4.38694e-85	5.41342e-83
ENSMUSG00000006050	Sra1	24068	2919.06	0.961843	0.0492254	19.5396	5.06137e-85	6.20073e-83
ENSMUSG00000031530	Dusp4	319520	616.646	2.41603	0.124343	19.4303	4.27967e-84	5.20561e-82
ENSMUSG00000038612	Mcl1	17210	34877.4	0.639345	0.0329104	19.4268	4.57959e-84	5.53091e-82
ENSMUSG00000011148	Adssl1	11565	4716.5	1.34091	0.0691852	19.3815	1.10542e-83	1.32564e-81
ENSMUSG00000020120	Plek	56193	48097.2	0.763253	0.039425	19.3596	1.69155e-83	2.01437e-81
ENSMUSG00000043832	Clec4a3	73149	1602.56	-1.44469	0.0746546	-19.3517	1.97206e-83	2.31601e-81
ENSMUSG00000023034	Nr4a1	15370	235.389	3.21402	0.166082	19.352	1.96005e-83	2.31601e-81
ENSMUSG00000063524	Eno1	13806	52119.1	0.803951	0.0415507	19.3487	2.09194e-83	2.43998e-81
ENSMUSG00000031722	Hp	15439	1254.45	1.95317	0.101263	19.288	6.76971e-83	7.84227e-81
ENSMUSG00000021996	Esd	13885	25695.9	0.804445	0.041801	19.2447	1.56485e-82	1.80053e-80
ENSMUSG00000024750	Zfand5	22682	9272.15	0.842888	0.0439335	19.1856	4.88732e-82	5.58565e-80
ENSMUSG00000025316	Banp	53325	723.877	-1.52115	0.0798256	-19.056	5.86253e-81	6.65553e-79
ENSMUSG00000059040	Eno1b	433182	27311.1	0.823274	0.0432099	19.0529	6.21808e-81	7.01243e-79
ENSMUSG00000014599	Csf1	12977	1148.94	2.2324	0.117422	19.0117	1.36364e-80	1.52773e-78
ENSMUSG00000030766	Arhgap17	70497	5591.96	-0.651582	0.0345372	-18.8661	2.16614e-79	2.41093e-77
ENSMUSG00000083773	Gm13394	100033452	13484.6	0.721761	0.0382591	18.8651	2.20937e-79	2.44307e-77
ENSMUSG00000045193	Cirbp	12696	677.721	1.98602	0.105817	18.7685	1.36627e-78	1.50104e-76
ENSMUSG00000024953	Prdx5	54683	28936.4	0.91548	0.0488531	18.7394	2.36073e-78	2.57698e-76
ENSMUSG00000082016	Pgam1-ps2	668045	13977.6	0.771876	0.0411998	18.7349	2.5697e-78	2.78723e-76
ENSMUSG00000034765	Dusp5	240672	284.669	2.92781	0.156324	18.7292	2.86311e-78	3.08581e-76
ENSMUSG00000059555	Tor4a	227612	7478.71	-0.799818	0.0427729	-18.6992	5.02593e-78	5.3828e-76
ENSMUSG00000059810	Rgs3	50780	806.029	1.54801	0.0830843	18.6318	1.77453e-77	1.88866e-75
ENSMUSG00000025402	Nab2	17937	949.342	1.42024	0.0762751	18.62	2.21416e-77	2.34192e-75
ENSMUSG00000030064	Frmd4b	232288	7618.43	-0.91511	0.0492716	-18.5728	5.33921e-77	5.61243e-75
ENSMUSG00000007872	Id3	15903	233.872	3.49548	0.188415	18.552	7.86085e-77	8.21242e-75
ENSMUSG00000015839	Nfe2l2	18024	21084.9	0.842882	0.0456045	18.4824	2.86019e-76	2.96989e-74
ENSMUSG00000024661	Fth1	14319	1.03901e+06	0.642668	0.0348093	18.4625	4.13566e-76	4.26825e-74
ENSMUSG00000032515	Csrnp1	215418	505.037	1.94879	0.105615	18.4519	5.03241e-76	5.16247e-74
ENSMUSG00000026701	Prdx6	11758	6769.11	1.01706	0.0551459	18.4432	5.91812e-76	6.03471e-74
ENSMUSG00000033933	Vhl	22346	3128.12	0.98194	0.0533807	18.395	1.43973e-75	1.45935e-73
ENSMUSG00000064193	Gm4735	103324	25033.7	0.821991	0.0447079	18.3858	1.70726e-75	1.7203e-73
ENSMUSG00000021701	Plk2	20620	11499.5	0.681668	0.037082	18.3828	1.80566e-75	1.80874e-73
ENSMUSG00000021109	Hif1a	15251	9823.55	0.783341	0.0426802	18.3537	3.08191e-75	3.06912e-73
ENSMUSG00000042622	Maff	17133	258.167	3.76477	0.205183	18.3483	3.40424e-75	3.37039e-73
ENSMUSG00000022667	Cd200r1	57781	4525.5	-0.76186	0.0415671	-18.3284	4.90802e-75	4.83114e-73
ENSMUSG00000020250	Txnrd1	50493	25660.8	0.959843	0.0524862	18.2875	1.04037e-74	1.01273e-72
ENSMUSG00000021477	Ctsl	13039	52511.5	0.749961	0.0410095	18.2875	1.04074e-74	1.01273e-72
ENSMUSG00000030144	Clec4d	17474	10500.9	0.79848	0.0436906	18.2758	1.29008e-74	1.24822e-72
ENSMUSG00000022967	Ifnar1	15975	13050.1	0.773629	0.0424719	18.2151	3.91813e-74	3.7696e-72
ENSMUSG00000078965	Gm12033	100042746	10231	0.758803	0.0416908	18.2007	5.09284e-74	4.87225e-72
ENSMUSG00000005057	Sh2b2	23921	739.938	1.88437	0.104257	18.0742	5.08736e-73	4.83982e-71
ENSMUSG00000038352	Arl5c	217151	1752.72	1.28288	0.0712943	17.9941	2.16573e-72	2.0489e-70
ENSMUSG00000056234	Ncoa4	27057	16504.7	-0.767562	0.0426806	-17.9839	2.60639e-72	2.45217e-70
ENSMUSG00000059195	Gm12715	100039940	34474	0.741248	0.0413909	17.9085	1.01297e-71	9.47799e-70
ENSMUSG00000095042	Gm12537	100041342	6298.03	0.77278	0.0431535	17.9077	1.02718e-71	9.55842e-70
ENSMUSG00000039005	Tlr4	21898	8770.54	-0.901624	0.0504331	-17.8776	1.76202e-71	1.63073e-69
ENSMUSG00000020400	Tnip1	57783	3151.68	1.06465	0.0596983	17.8338	3.86386e-71	3.55663e-69
ENSMUSG00000033450	Tagap	72536	2485.45	1.22515	0.0692447	17.693	4.74388e-70	4.34321e-68
ENSMUSG00000035004	Igsf6	80719	10465.9	0.972969	0.0550147	17.6856	5.41242e-70	4.92878e-68
ENSMUSG00000038400	Pmepa1	65112	3560.15	1.26868	0.0719498	17.6328	1.37915e-69	1.24923e-67
ENSMUSG00000022351	Sqle	20775	1108.77	1.0893	0.0618422	17.6142	1.91637e-69	1.72666e-67
ENSMUSG00000078636	Gm7336	654473	6499.77	0.787218	0.0449217	17.5242	9.36292e-69	8.39164e-67
ENSMUSG00000023915	Tnfrsf21	94185	8293.28	0.643127	0.036707	17.5206	9.98419e-69	8.90161e-67
ENSMUSG00000058755	Osm	18413	732.372	1.30735	0.0746257	17.5188	1.0294e-68	9.13002e-67
ENSMUSG00000026796	Fam129b	227737	10309.6	0.761163	0.0435324	17.485	1.86544e-68	1.64594e-66
ENSMUSG00000020275	Rel	19696	1284.02	1.28531	0.0736263	17.4572	3.03527e-68	2.66431e-66
ENSMUSG00000033307	Mif	17319	6968.68	0.861719	0.0493631	17.4567	3.05986e-68	2.67212e-66
ENSMUSG00000052160	Pld4	104759	24627.2	-0.53103	0.0304396	-17.4453	3.73476e-68	3.24486e-66
ENSMUSG00000095937	Gm12671	654475	6466.95	0.786472	0.0451007	17.4381	4.23738e-68	3.66286e-66
ENSMUSG00000048537	Phldb1	102693	614.2	1.81365	0.105236	17.2341	1.47286e-66	1.26673e-64
ENSMUSG00000026031	Cflar	12633	8144.39	0.92814	0.0540691	17.1658	4.78576e-66	4.09531e-64
ENSMUSG00000024640	Psat1	107272	1612.43	1.50108	0.087502	17.1548	5.79108e-66	4.93082e-64
ENSMUSG00000081221	Gm14760	654474	6331.5	0.781977	0.0456146	17.1431	7.07411e-66	5.99329e-64
ENSMUSG00000032420	Nt5e	23959	363.032	2.70059	0.158087	17.0829	1.99054e-65	1.67807e-63
ENSMUSG00000018932	Map2k3	26397	4253.47	0.699896	0.0409971	17.0718	2.40498e-65	2.01746e-63
ENSMUSG00000051343	Rab11fip5	52055	9970.82	-0.592544	0.0347239	-17.0645	2.72928e-65	2.27828e-63
ENSMUSG00000067714	Lpar5	381810	914.246	-1.26363	0.0742904	-17.0094	6.99546e-65	5.81101e-63
ENSMUSG00000019960	Dusp6	67603	7203.26	-0.833581	0.0490658	-16.989	9.90205e-65	8.18554e-63
ENSMUSG00000021908	Gm6768	627557	12009.1	-0.756106	0.0445381	-16.9766	1.22315e-64	1.00623e-62
ENSMUSG00000037868	Egr2	13654	964.359	1.65457	0.0979526	16.8915	5.19261e-64	4.2512e-62
ENSMUSG00000031129	Slc9a9	331004	4344.5	-0.975484	0.0578706	-16.8563	9.4316e-64	7.68472e-62
ENSMUSG00000053716	Dusp7	235584	4161.57	-0.748793	0.0444434	-16.8482	1.08095e-63	8.76547e-62
ENSMUSG00000039911	Spsb1	74646	730.862	1.55361	0.0923991	16.8141	1.92237e-63	1.54415e-61
ENSMUSG00000046434	Hnrnpa1	15382	2976.88	0.870602	0.0518695	16.7845	3.17077e-63	2.53498e-61
ENSMUSG00000003382	Etv3	27049	4634.23	0.650907	0.0387978	16.7769	3.60256e-63	2.86673e-61
ENSMUSG00000000957	Mmp14	17387	6836.75	0.981167	0.0584907	16.7747	3.73459e-63	2.95797e-61
ENSMUSG00000038059	Smim3	106878	1060.89	1.37189	0.0818949	16.7518	5.49393e-63	4.3313e-61
ENSMUSG00000028497	Hacd4	66775	7213.97	-0.780013	0.0465683	-16.7499	5.67452e-63	4.45306e-61
ENSMUSG00000029650	Slc46a3	71706	1514.19	-1.25597	0.0750162	-16.7427	6.40153e-63	5.00054e-61
ENSMUSG00000096617	Gm5559	433921	7806.57	0.763269	0.0456188	16.7315	7.73133e-63	6.01173e-61
ENSMUSG00000071172	Srsf3	20383	7797.1	0.620205	0.0373015	16.6268	4.45635e-62	3.44942e-60
ENSMUSG00000029804	Herc3	73998	1060.75	1.2309	0.0744433	16.5348	2.06129e-61	1.58831e-59
ENSMUSG00000026547	Tagln2	21346	10132.8	0.62771	0.0380018	16.5179	2.72616e-61	2.09116e-59
ENSMUSG00000048120	Entpd1	12495	2465.67	-1.1338	0.0687	-16.5036	3.45741e-61	2.64019e-59
ENSMUSG00000037253	Mex3c	240396	3192.58	1.09572	0.0664267	16.4951	3.97707e-61	3.02346e-59
ENSMUSG00000026938	Fcna	14133	12197.8	0.605092	0.0366889	16.4925	4.15223e-61	3.14259e-59
ENSMUSG00000043421	Hilpda	69573	498.05	1.41547	0.0858369	16.4902	4.31311e-61	3.24991e-59
ENSMUSG00000024817	Uhrf2	109113	4270.54	-0.807404	0.0489839	-16.483	4.85893e-61	3.64505e-59
ENSMUSG00000073678	Pgap1	241062	2677.67	-0.932645	0.0566634	-16.4594	7.18331e-61	5.36512e-59
ENSMUSG00000025225	Nfkb2	18034	6625.89	1.11927	0.0680198	16.4551	7.71191e-61	5.73476e-59
ENSMUSG00000002741	Ykt6	56418	5955.23	0.701681	0.0428086	16.3911	2.21359e-60	1.63892e-58
ENSMUSG00000043889	Gm8399	666979	10256.8	0.730214	0.0445508	16.3906	2.23231e-60	1.64563e-58
ENSMUSG00000040511	Pvr	52118	766.48	1.3438	0.0822043	16.3471	4.56004e-60	3.34711e-58
ENSMUSG00000039747	Orai2	269717	3152.92	0.911837	0.0558037	16.3401	5.11798e-60	3.74052e-58
ENSMUSG00000013707	Tnfaip8l2	69769	5294.91	-0.859246	0.052822	-16.2668	1.69713e-59	1.23506e-57
ENSMUSG00000028494	Plin2	11520	40708.3	-0.547597	0.0336835	-16.2571	1.98917e-59	1.44143e-57
ENSMUSG00000015355	Cd48	12506	10156.4	-0.646534	0.0399416	-16.187	6.23208e-59	4.49687e-57
ENSMUSG00000026737	Pip4k2a	18718	5600.56	-0.63186	0.0390912	-16.1637	9.08731e-59	6.52944e-57
ENSMUSG00000094708	Gm10359	100042349	6013.76	0.791623	0.0489975	16.1564	1.02414e-58	7.32774e-57
ENSMUSG00000074622	Mafb	16658	14853.6	-0.898374	0.0558781	-16.0774	3.67651e-58	2.61955e-56
ENSMUSG00000024014	Pim1	18712	395.172	2.5533	0.158949	16.0637	4.58344e-58	3.25214e-56
ENSMUSG00000038332	Sesn1	140742	7963.74	-0.804106	0.0500639	-16.0616	4.7419e-58	3.35062e-56
ENSMUSG00000025810	Nrp1	18186	21985.1	-0.559751	0.0349086	-16.0348	7.3053e-58	5.14058e-56
ENSMUSG00000038776	Ephx1	13849	2485.44	-0.772627	0.0482033	-16.0285	8.07927e-58	5.66181e-56
ENSMUSG00000022788	Fgd4	224014	2678.6	-1.21421	0.0757931	-16.02	9.25791e-58	6.46119e-56
ENSMUSG00000030930	Chst15	77590	1244.92	-1.09033	0.068062	-16.0196	9.31828e-58	6.47677e-56
ENSMUSG00000031799	Tpm4	326618	24013.1	0.719835	0.0449447	16.016	9.88027e-58	6.83947e-56
ENSMUSG00000045664	Cdc42ep2	104252	324.512	3.48156	0.217411	16.0137	1.02478e-57	7.06516e-56
ENSMUSG00000005087	Cd44	12505	8913.77	0.652724	0.0407926	16.001	1.2568e-57	8.62986e-56
ENSMUSG00000046079	Lrrc8d	231549	5088.66	0.764322	0.0479604	15.9365	3.53364e-57	2.40697e-55
ENSMUSG00000022122	Ednrb	13618	23724.7	-0.871446	0.0548044	-15.901	6.23298e-57	4.22874e-55
ENSMUSG00000069939	Gm12070	654472	3818.36	0.798132	0.0502656	15.8783	8.95847e-57	6.05372e-55
ENSMUSG00000023951	Vegfa	22339	1683.34	1.33442	0.0840483	15.8769	9.1659e-57	6.16941e-55
ENSMUSG00000044197	Gpr146	80290	2775.41	-0.864866	0.0545202	-15.8632	1.13908e-56	7.63678e-55
ENSMUSG00000025044	Msr1	20288	40679.3	0.741217	0.0468423	15.8237	2.13672e-56	1.42691e-54
ENSMUSG00000040451	Sgms1	208449	3787.87	0.734748	0.0465055	15.7992	3.15323e-56	2.09751e-54
ENSMUSG00000056153	Socs6	54607	4909.32	-0.895779	0.0567855	-15.7748	4.63984e-56	3.07439e-54
ENSMUSG00000024772	Ehd1	13660	23908.9	1.04342	0.0662645	15.7462	7.28957e-56	4.8114e-54
ENSMUSG00000078566	Bnip3	12176	3306.58	0.905655	0.0576173	15.7185	1.13041e-55	7.43236e-54
ENSMUSG00000038418	Egr1	13653	1639.51	1.82528	0.116333	15.6902	1.76558e-55	1.15638e-53
ENSMUSG00000037318	Traf3ip3	215243	1250.65	-1.0601	0.0676803	-15.6633	2.69482e-55	1.75824e-53
ENSMUSG00000079020	Slc45a4	106068	5107.52	-0.637589	0.0407545	-15.6446	3.61427e-55	2.34914e-53
ENSMUSG00000043017	Ptgir	19222	498.802	2.29383	0.146729	15.6331	4.3337e-55	2.80603e-53
ENSMUSG00000030717	Nupr1	56312	1391.55	1.28079	0.0819449	15.6299	4.55397e-55	2.93748e-53
ENSMUSG00000025591	Tma16	66282	1278.58	2.09641	0.134364	15.6025	7.00334e-55	4.50037e-53
ENSMUSG00000054342	Kcnn4	16534	2122.3	1.11541	0.0717904	15.537	1.94799e-54	1.24708e-52
ENSMUSG00000008384	Sertad1	55942	858.682	1.29958	0.0838958	15.4904	4.0262e-54	2.56787e-52
ENSMUSG00000022831	Hcls1	15163	10659.2	0.700658	0.0452683	15.4779	4.89052e-54	3.10749e-52
ENSMUSG00000031304	Il2rg	16186	1284.83	1.22545	0.0791763	15.4775	4.92479e-54	3.11763e-52
ENSMUSG00000018924	Alox15	11687	2424.71	-0.812431	0.052526	-15.4672	5.77555e-54	3.64266e-52
ENSMUSG00000037580	Gch1	14528	3116.01	1.45415	0.0942896	15.4222	1.16138e-53	7.29785e-52
ENSMUSG00000042396	Rbm7	67010	5246.33	0.661342	0.0430182	15.3736	2.4627e-53	1.54182e-51
ENSMUSG00000018500	Adora2b	11541	180.466	3.61579	0.235386	15.3611	2.98603e-53	1.8626e-51
ENSMUSG00000021890	Eaf1	74427	6854.27	0.821028	0.0534845	15.3507	3.50134e-53	2.17607e-51
ENSMUSG00000040026	Saa3	20210	59223.5	1.21221	0.0791623	15.313	6.25792e-53	3.87513e-51
ENSMUSG00000021125	Arg2	11847	543.865	1.80442	0.118179	15.2685	1.23922e-52	7.64591e-51
ENSMUSG00000078300	Gm2606	100040109	3284.48	0.722324	0.0474282	15.2298	2.24141e-52	1.37794e-50
ENSMUSG00000056501	Cebpb	12608	6188.3	2.02313	0.132883	15.2249	2.41826e-52	1.48131e-50
ENSMUSG00000023087	Noct	12457	283.193	2.05592	0.135129	15.2145	2.83178e-52	1.7284e-50
ENSMUSG00000026981	Il1rn	16181	438.178	2.10359	0.13847	15.1917	4.01473e-52	2.44167e-50
ENSMUSG00000037306	Man1c1	230815	20926.2	-0.537201	0.0354111	-15.1704	5.55247e-52	3.36488e-50
ENSMUSG00000017707	Serinc3	26943	84504.9	-0.560792	0.0369778	-15.1657	5.96999e-52	3.60507e-50
ENSMUSG00000025981	Coq10b	67876	781.796	1.26484	0.0836008	15.1295	1.03483e-51	6.22689e-50
ENSMUSG00000030162	Olr1	108078	135.113	6.39367	0.423952	15.0811	2.15606e-51	1.2928e-49
ENSMUSG00000035235	Trim13	66597	516.252	1.75074	0.116527	15.0243	5.08838e-51	3.04035e-49
ENSMUSG00000020184	Mdm2	17246	7626.44	0.477097	0.0318641	14.9729	1.10446e-50	6.57619e-49
ENSMUSG00000043091	Tuba1c	22146	21526.5	0.551455	0.0369044	14.9428	1.73612e-50	1.03012e-48
ENSMUSG00000034902	Pip5k1c	18717	15170.2	0.529224	0.0354516	14.9281	2.16481e-50	1.28002e-48
ENSMUSG00000056737	Capg	12332	25093.6	0.519537	0.0348582	14.9043	3.09059e-50	1.82109e-48
ENSMUSG00000021277	Traf3	22031	2672.68	0.743488	0.0498965	14.9006	3.2657e-50	1.91764e-48
ENSMUSG00000035164	Zc3h12c	244871	1128.01	1.47433	0.099163	14.8677	5.34075e-50	3.12535e-48
ENSMUSG00000037465	Klf10	21847	2712.47	0.803786	0.0541433	14.8455	7.43571e-50	4.33639e-48
ENSMUSG00000027737	Slc7a11	26570	1577.23	2.92171	0.196818	14.8447	7.52689e-50	4.37459e-48
ENSMUSG00000026832	Cytip	227929	387.461	2.17472	0.146804	14.8138	1.19302e-49	6.9102e-48
ENSMUSG00000046027	Stard5	170460	2436.13	-0.782119	0.0528407	-14.8015	1.43347e-49	8.27477e-48
ENSMUSG00000028613	Lrp8	16975	544.9	2.17379	0.147049	14.7828	1.89272e-49	1.08889e-47
ENSMUSG00000031216	Stard8	236920	7514.41	-0.737726	0.0500229	-14.7478	3.18036e-49	1.82352e-47
ENSMUSG00000019923	Zwint	52696	5997.44	0.772501	0.0524105	14.7394	3.59797e-49	2.05603e-47
ENSMUSG00000026360	Rgs2	19735	5030.54	-1.06045	0.0719603	-14.7365	3.75526e-49	2.13874e-47
ENSMUSG00000026305	Lrrfip1	16978	5331.09	0.784909	0.0532643	14.7361	3.77964e-49	2.14545e-47
ENSMUSG00000021508	Cxcl14	57266	7263.06	0.938545	0.0636969	14.7346	3.86692e-49	2.1877e-47
ENSMUSG00000023456	Tpi1	21991	22128.4	0.619036	0.0420419	14.7243	4.50401e-49	2.5397e-47
ENSMUSG00000073557	Ppp1r12b	329251	1158.26	1.26305	0.0862358	14.6465	1.4178e-48	7.96824e-47
ENSMUSG00000009090	Ap1b1	11764	12495.9	-0.587645	0.0401512	-14.6358	1.66062e-48	9.30219e-47
ENSMUSG00000028691	Prdx1	18477	228047	0.517197	0.0353634	14.6252	1.93967e-48	1.08297e-46
ENSMUSG00000050533	Gm9845	100040853	1200.32	1.14965	0.0787354	14.6014	2.75097e-48	1.53092e-46
ENSMUSG00000018395	Kif3a	16568	8141.87	-0.811404	0.0556097	-14.591	3.20275e-48	1.77654e-46
ENSMUSG00000032786	Alas1	11655	8486.02	0.616996	0.0422895	14.5898	3.26179e-48	1.80341e-46
ENSMUSG00000048897	Zfp710	209225	4122.12	-0.69186	0.0474292	-14.5872	3.38685e-48	1.86649e-46
ENSMUSG00000019987	Arg1	11846	9353.71	1.63697	0.112257	14.5824	3.63659e-48	1.99766e-46
ENSMUSG00000044468	Tent5c	74645	2837.87	0.879783	0.0605109	14.5392	6.83433e-48	3.74218e-46
ENSMUSG00000032737	Inppl1	16332	6991.46	-0.485873	0.0335028	-14.5025	1.16843e-47	6.3773e-46
ENSMUSG00000033857	Engase	217364	1554.67	-1.48409	0.10249	-14.4804	1.61269e-47	8.77399e-46
ENSMUSG00000031278	Acsl4	50790	6920.3	0.707863	0.0488964	14.4768	1.69818e-47	9.20964e-46
ENSMUSG00000057329	Bcl2	12043	870.237	1.065	0.0736843	14.4535	2.3814e-47	1.28739e-45
ENSMUSG00000029552	Tes	21753	3719.78	0.772751	0.0534764	14.4503	2.49473e-47	1.34439e-45
ENSMUSG00000030956	Fam53b	77938	3505.35	-0.792628	0.0549599	-14.4219	3.76577e-47	2.02294e-45
ENSMUSG00000027544	Nfatc2	18019	2566.72	-0.874407	0.0607477	-14.3941	5.63684e-47	3.01854e-45
ENSMUSG00000027678	Ncoa3	17979	7132.82	-0.733939	0.0510229	-14.3845	6.47483e-47	3.45642e-45
ENSMUSG00000034674	Tdg	21665	2070.18	0.784179	0.0547791	14.3153	1.75669e-46	9.31919e-45
ENSMUSG00000035828	Pim3	223775	1100.98	1.2472	0.0871776	14.3064	1.99492e-46	1.05502e-44
ENSMUSG00000024095	Hnrnpll	72692	3866.34	0.574552	0.0404733	14.1958	9.72418e-46	5.12672e-44
ENSMUSG00000022180	Slc7a8	50934	12615	0.79176	0.0558275	14.1823	1.17976e-45	6.20065e-44
ENSMUSG00000019528	Gyg	27357	6025.9	-0.723322	0.0510194	-14.1774	1.26453e-45	6.62574e-44
ENSMUSG00000053907	Mat2a	232087	9870.2	0.53253	0.0375743	14.1727	1.35191e-45	7.06189e-44
ENSMUSG00000026970	Rbms1	56878	5440.95	0.585303	0.0413584	14.152	1.81562e-45	9.45509e-44
ENSMUSG00000026867	Gapvd1	66691	9590.39	-0.541634	0.0383751	-14.1142	3.10514e-45	1.61212e-43
ENSMUSG00000028214	Gem	14579	90.7034	3.38884	0.240358	14.0991	3.84406e-45	1.98968e-43
ENSMUSG00000030605	Mfge8	17304	1693.38	-0.819907	0.0582392	-14.0783	5.16631e-45	2.66597e-43
ENSMUSG00000030695	Aldoa	11674	66594.5	0.452266	0.032222	14.0359	9.39375e-45	4.83281e-43
ENSMUSG00000031101	Sash3	74131	3478.92	-0.656722	0.0469154	-13.998	1.60351e-44	8.22477e-43
ENSMUSG00000041153	Osgin2	209212	912.181	1.09303	0.0782122	13.9752	2.2102e-44	1.13025e-42
ENSMUSG00000023349	Clec4n	56620	16523.9	0.897291	0.0642331	13.9693	2.39973e-44	1.2235e-42
ENSMUSG00000031451	Gas6	14456	37120.8	-0.903278	0.0646716	-13.9671	2.4736e-44	1.2574e-42
ENSMUSG00000027947	Il6ra	16194	1862.85	-0.798735	0.0571885	-13.9667	2.48929e-44	1.26161e-42
ENSMUSG00000008398	Elk3	13713	2480.59	0.74933	0.0537718	13.9354	3.86199e-44	1.95151e-42
ENSMUSG00000047414	Flrt2	399558	1694.79	-1.14367	0.0823725	-13.8841	7.91066e-44	3.98552e-42
ENSMUSG00000019966	Kitl	17311	1866.77	-0.935017	0.0674698	-13.8583	1.133e-43	5.69138e-42
ENSMUSG00000030403	Vasp	22323	7698.79	0.844453	0.0609433	13.8564	1.16434e-43	5.83164e-42
ENSMUSG00000028599	Tnfrsf1b	21938	28034.2	0.45568	0.032921	13.8416	1.42939e-43	7.13814e-42
ENSMUSG00000030265	Kras	16653	3475.19	0.673856	0.0487222	13.8306	1.66712e-43	8.30099e-42
ENSMUSG00000004814	Ccl24	56221	269.92	1.74459	0.126163	13.8281	1.72547e-43	8.56647e-42
ENSMUSG00000030557	Mef2a	17258	12763.8	0.588441	0.042578	13.8203	1.92229e-43	9.51588e-42
ENSMUSG00000079227	Ccr5	12774	3419.22	-0.664108	0.0480872	-13.8105	2.20288e-43	1.08733e-41
ENSMUSG00000053641	Dennd4a	102442	1812.54	1.23006	0.0891241	13.8016	2.4924e-43	1.22668e-41
ENSMUSG00000032265	Tent5a	212943	2086.32	-1.38366	0.100639	-13.7487	5.18185e-43	2.54299e-41
ENSMUSG00000026064	Ptp4a1	19243	12204.8	0.627959	0.0456754	13.7483	5.21344e-43	2.54383e-41
ENSMUSG00000022965	Ifngr2	15980	13363.4	0.541647	0.039397	13.7484	5.20414e-43	2.54383e-41
ENSMUSG00000026548	Slamf9	98365	1166.33	1.42694	0.103917	13.7316	6.56476e-43	3.19404e-41
ENSMUSG00000007458	M6pr	17113	20935.4	0.533722	0.0389318	13.7091	8.95024e-43	4.34227e-41
ENSMUSG00000082424	Gm13292	100040898	1895.23	0.778764	0.0568421	13.7005	1.00858e-42	4.87929e-41
ENSMUSG00000017009	Sdc4	20971	3659.08	0.900429	0.0657807	13.6883	1.19195e-42	5.75006e-41
ENSMUSG00000017493	Igfbp4	16010	17336	-0.561386	0.0410186	-13.6861	1.22875e-42	5.91085e-41
ENSMUSG00000028961	Pgd	110208	30403.7	0.543424	0.0397128	13.6838	1.26801e-42	6.0825e-41
ENSMUSG00000039377	Hlx	15284	1922.44	-1.1398	0.0834307	-13.6617	1.72009e-42	8.22792e-41
ENSMUSG00000047180	Neurl3	214854	6292.96	0.541696	0.0397438	13.6297	2.66632e-42	1.27184e-40
ENSMUSG00000021822	Plau	18792	748.349	1.36355	0.100219	13.6058	3.6983e-42	1.75917e-40
ENSMUSG00000039361	Picalm	233489	10003.9	0.499693	0.0367309	13.6042	3.78229e-42	1.79411e-40
ENSMUSG00000053007	Creb5	231991	460.114	2.04971	0.151053	13.5695	6.07619e-42	2.87421e-40
ENSMUSG00000046687	Gm5424	432466	330.806	3.29794	0.243352	13.5522	7.69353e-42	3.62917e-40
ENSMUSG00000040297	Suco	226551	1787.47	0.715079	0.0528135	13.5397	9.11744e-42	4.28897e-40
ENSMUSG00000015217	Hmgb3	15354	289.898	1.73092	0.12796	13.5271	1.08264e-41	5.07885e-40
ENSMUSG00000020806	Rhbdf2	217344	6730.92	0.843333	0.062358	13.5241	1.12787e-41	5.27651e-40
ENSMUSG00000032350	Gclc	14629	3824.5	1.07612	0.0795986	13.5193	1.20278e-41	5.61156e-40
ENSMUSG00000034271	Jdp2	81703	1022.2	1.11049	0.0821465	13.5184	1.21774e-41	5.6658e-40
ENSMUSG00000020661	Dnmt3a	13435	8112.69	-0.648102	0.0479526	-13.5155	1.26737e-41	5.88066e-40
ENSMUSG00000040659	Efhd2	27984	22909.4	0.567679	0.0420199	13.5098	1.36934e-41	6.33656e-40
ENSMUSG00000045502	Hcar2	80885	820.284	1.72056	0.127433	13.5017	1.52888e-41	7.05563e-40
ENSMUSG00000078592	Gm4609	100043724	2133.97	0.79917	0.0592604	13.4857	1.89779e-41	8.73445e-40
ENSMUSG00000020869	Lrrc59	98238	12382.9	0.508397	0.0377083	13.4824	1.98663e-41	9.11866e-40
ENSMUSG00000026238	Ptma	19231	14988.5	0.544038	0.0404853	13.4379	3.62516e-41	1.65948e-39
ENSMUSG00000046245	Pilra	231805	2688.36	1.0506	0.078287	13.4199	4.62217e-41	2.11021e-39
ENSMUSG00000072235	Tuba1a	22142	11759.1	0.642014	0.0478903	13.4059	5.58188e-41	2.54155e-39
ENSMUSG00000054510	Gm14461	329436	700.333	-1.57494	0.117591	-13.3933	6.61616e-41	3.00444e-39
ENSMUSG00000022378	Fam49b	223601	7687.57	0.443985	0.0331923	13.3761	8.33605e-41	3.77539e-39
ENSMUSG00000004609	Cd33	12489	4206.53	0.687651	0.0514521	13.3649	9.69815e-41	4.38063e-39
ENSMUSG00000055546	Timd4	276891	1742.92	1.30648	0.0978432	13.3527	1.14162e-40	5.14304e-39
ENSMUSG00000030203	Dusp16	70686	570.776	1.51344	0.113403	13.3457	1.25495e-40	5.63865e-39
ENSMUSG00000021546	Hnrnpk	15387	31915.7	0.408051	0.0306143	13.3288	1.57454e-40	7.056e-39
ENSMUSG00000025854	Fam20c	80752	36511.1	0.560791	0.0421909	13.2918	2.58387e-40	1.15488e-38
ENSMUSG00000049091	Sephs2	20768	4601.44	0.840985	0.0633037	13.2849	2.83145e-40	1.26222e-38
ENSMUSG00000001525	Tubb5	22154	12876.4	0.586363	0.0442433	13.2531	4.32708e-40	1.92391e-38
ENSMUSG00000025059	Gk	14933	2228.31	0.703126	0.0531143	13.238	5.29494e-40	2.34811e-38
ENSMUSG00000026170	Cyp27a1	104086	1814.29	-0.945578	0.0717061	-13.1869	1.04459e-39	4.62034e-38
ENSMUSG00000041797	Abca9	217262	6724.73	-0.925835	0.0702109	-13.1865	1.04973e-39	4.63107e-38
ENSMUSG00000023075	Akirin1	68050	8680.06	0.60502	0.0459526	13.1662	1.37421e-39	6.04688e-38
ENSMUSG00000041707	Tmem273	69069	2053.55	-0.806437	0.0614845	-13.1161	2.66249e-39	1.16854e-37
ENSMUSG00000056145	AI504432	229694	131.405	2.69552	0.205797	13.0979	3.38339e-39	1.48112e-37
ENSMUSG00000057137	Tmem140	68487	627.96	-1.10503	0.0844196	-13.0897	3.77199e-39	1.647e-37
ENSMUSG00000032089	Il10ra	16154	9860.42	0.617602	0.0471906	13.0874	3.88713e-39	1.69294e-37
ENSMUSG00000030447	Cyfip1	20430	37920.2	0.487564	0.03727	13.082	4.17579e-39	1.81402e-37
ENSMUSG00000049313	Sorl1	20660	5188.59	-1.20451	0.0923486	-13.0431	6.95611e-39	3.01414e-37
ENSMUSG00000043391	2510009E07Rik	72190	15114.3	0.536299	0.0411545	13.0313	8.11616e-39	3.50787e-37
ENSMUSG00000037661	Gpr160	71862	806.858	-1.21494	0.0932814	-13.0244	8.88396e-39	3.83e-37
ENSMUSG00000022237	Ankrd33b	67434	501.74	1.56978	0.12055	13.0219	9.18968e-39	3.94942e-37
ENSMUSG00000037523	Mavs	228607	2908.54	-0.61142	0.047017	-13.0042	1.15761e-38	4.95301e-37
ENSMUSG00000061024	Rrs1	59014	1545.52	1.01469	0.0781693	12.9806	1.5757e-38	6.72495e-37
ENSMUSG00000040751	Lat2	56743	5783.29	0.697448	0.0538157	12.9599	2.06469e-38	8.76798e-37
ENSMUSG00000040152	Thbs1	21825	3098.68	1.81448	0.140036	12.9572	2.13776e-38	9.05568e-37
ENSMUSG00000031431	Tsc22d3	14605	1376.26	-1.17219	0.0904979	-12.9526	2.26991e-38	9.59165e-37
ENSMUSG00000037966	Ninj1	18081	21685	0.566318	0.0437484	12.9449	2.51145e-38	1.0586e-36
ENSMUSG00000028300	C9orf72	73205	2821.3	0.706026	0.0546431	12.9207	3.441e-38	1.44684e-36
ENSMUSG00000021670	Hmgcr	15357	2503.6	0.876358	0.0680949	12.8696	6.67049e-38	2.79783e-36
ENSMUSG00000041633	Kctd12b	207474	806.51	-1.18615	0.0923267	-12.8473	8.90304e-38	3.72506e-36
ENSMUSG00000040522	Tlr8	170744	5959.11	-0.582391	0.0453385	-12.8454	9.12798e-38	3.80981e-36
ENSMUSG00000072620	Slfn2	20556	16848.5	1.53454	0.1196	12.8307	1.10426e-37	4.59765e-36
ENSMUSG00000017781	Pitpna	18738	21231.1	0.36478	0.0285193	12.7907	1.8489e-37	7.67923e-36
ENSMUSG00000026094	Stk17b	98267	4094.48	-0.660237	0.0516219	-12.7899	1.86789e-37	7.73926e-36
ENSMUSG00000001630	Stk38l	232533	869.408	0.975519	0.0764266	12.7641	2.60046e-37	1.07484e-35
ENSMUSG00000042605	Atxn2	20239	3186.73	-0.54099	0.042415	-12.7547	2.93629e-37	1.21071e-35
ENSMUSG00000040128	Pnrc1	108767	5356.82	0.641476	0.0503425	12.7422	3.44404e-37	1.41322e-35
ENSMUSG00000040010	Slc7a5	20539	1112.68	1.29548	0.101682	12.7405	3.52187e-37	1.44168e-35
ENSMUSG00000009621	Vav2	22325	3235.45	-0.679038	0.0533071	-12.7382	3.62531e-37	1.48046e-35
ENSMUSG00000017652	Cd40	21939	1226.52	1.4233	0.111852	12.7249	4.29872e-37	1.75127e-35
ENSMUSG00000030342	Cd9	12527	30620.6	0.532465	0.041856	12.7213	4.50031e-37	1.82902e-35
ENSMUSG00000029135	Fosl2	14284	1956.96	0.818953	0.064381	12.7204	4.55508e-37	1.84687e-35
ENSMUSG00000025856	Pdgfa	18590	893.976	1.02882	0.0808929	12.7183	4.68151e-37	1.89362e-35
ENSMUSG00000078812	Eif5a	276770	17931.6	0.455508	0.0358272	12.714	4.94254e-37	1.99447e-35
ENSMUSG00000031776	Arl2bp	107566	1688.77	0.85665	0.0674761	12.6956	6.25417e-37	2.51778e-35
ENSMUSG00000056201	Cfl1	12631	38211.2	0.53088	0.0419005	12.67	8.66983e-37	3.48204e-35
ENSMUSG00000044583	Tlr7	170743	11393.3	-0.65437	0.0516584	-12.6673	8.97942e-37	3.59789e-35
ENSMUSG00000032633	Flcn	216805	6150.27	-0.502179	0.0397064	-12.6473	1.15783e-36	4.62835e-35
ENSMUSG00000099083	Atf7	223922	2068.39	-0.746324	0.0590522	-12.6384	1.29708e-36	5.17283e-35
ENSMUSG00000034652	Cd300a	217303	6318	-0.686345	0.0543608	-12.6257	1.52331e-36	6.06086e-35
ENSMUSG00000030595	Nfkbib	18036	1633.84	0.991868	0.0785885	12.621	1.61675e-36	6.41762e-35
ENSMUSG00000034343	Ube2f	67921	3773.21	0.572319	0.0453947	12.6076	1.91686e-36	7.59122e-35
ENSMUSG00000027611	Procr	19124	564.277	1.31274	0.104235	12.594	2.27705e-36	8.99671e-35
ENSMUSG00000032688	Malt1	240354	1212.2	0.97741	0.0776684	12.5844	2.57287e-36	1.0142e-34
ENSMUSG00000037458	Azin1	54375	5792.3	0.618712	0.0492615	12.5598	3.51387e-36	1.38193e-34
ENSMUSG00000058099	Nfam1	74039	8690.49	-0.583243	0.0464863	-12.5465	4.15239e-36	1.62929e-34
ENSMUSG00000018339	Gpx3	14778	6164.13	-0.624581	0.0499144	-12.513	6.33514e-36	2.48003e-34
ENSMUSG00000022529	Zfp263	74120	3816.36	0.663277	0.0531025	12.4905	8.4119e-36	3.28546e-34
ENSMUSG00000033083	Tbc1d4	210789	3571.01	-0.714949	0.0573001	-12.4773	9.93285e-36	3.87063e-34
ENSMUSG00000054263	Lifr	16880	739.095	-1.17074	0.0938391	-12.476	1.00891e-35	3.92253e-34
ENSMUSG00000020277	Pfkl	18641	10262.8	0.641325	0.0514622	12.4621	1.20226e-35	4.66361e-34
ENSMUSG00000045799	Gm9800	100041948	4437.12	0.557628	0.0447993	12.4472	1.4476e-35	5.60253e-34
ENSMUSG00000009079	Ewsr1	14030	10281	0.462899	0.0372282	12.4341	1.70706e-35	6.59173e-34
ENSMUSG00000005410	Mcm5	17218	1966.01	1.04814	0.0844062	12.4178	2.09226e-35	8.06088e-34
ENSMUSG00000036390	Gadd45a	13197	590.377	1.17219	0.094569	12.3951	2.77691e-35	1.06745e-33
ENSMUSG00000033446	Lpar6	67168	2354.29	-0.943083	0.0761676	-12.3817	3.28359e-35	1.25938e-33
ENSMUSG00000027346	Gpcpd1	74182	2823.91	0.675941	0.0546404	12.3707	3.76413e-35	1.44043e-33
ENSMUSG00000045294	Insig1	231070	2521.72	0.784189	0.0634421	12.3607	4.264e-35	1.62806e-33
ENSMUSG00000000682	Cd52	23833	9292.45	0.700176	0.0568592	12.3142	7.59499e-35	2.88694e-33
ENSMUSG00000005054	Cstb	13014	27361.8	0.489854	0.039779	12.3144	7.57906e-35	2.88694e-33
ENSMUSG00000028792	Ak2	11637	2529.9	0.628841	0.051104	12.3051	8.49861e-35	3.22323e-33
ENSMUSG00000027589	Pcmtd2	245867	2281.74	-0.68681	0.0558349	-12.3007	8.97611e-35	3.39676e-33
ENSMUSG00000014867	Surf4	20932	16167.2	0.494012	0.0402327	12.2789	1.17645e-34	4.44207e-33
ENSMUSG00000035273	Hpse	15442	7296.27	-0.634772	0.0516994	-12.2781	1.18715e-34	4.47256e-33
ENSMUSG00000023066	Rttn	246102	448.327	-1.34351	0.109586	-12.2599	1.48596e-34	5.58595e-33
ENSMUSG00000036427	Gpi1	14751	12213.8	0.452412	0.0369272	12.2515	1.64958e-34	6.18736e-33
ENSMUSG00000061132	Blnk	17060	7695.83	-0.462802	0.0378119	-12.2396	1.91017e-34	7.14907e-33
ENSMUSG00000076617	Ighm	16019	225.259	-1.83667	0.150199	-12.2282	2.19625e-34	8.20174e-33
ENSMUSG00000022102	Dok2	13449	1719.31	0.95418	0.0785056	12.1543	5.44294e-34	2.02818e-32
ENSMUSG00000066800	Rnasel	24014	1796.36	-0.988843	0.0813724	-12.1521	5.59342e-34	2.0797e-32
ENSMUSG00000018286	Psmb6	19175	9888.57	0.512743	0.0422783	12.1278	7.52325e-34	2.79114e-32
ENSMUSG00000091421	Gm4202	100418460	7449.9	0.430873	0.0355585	12.1173	8.5529e-34	3.16624e-32
ENSMUSG00000028970	Abcb1b	18669	2405.84	-0.687598	0.0567741	-12.1111	9.22214e-34	3.40659e-32
ENSMUSG00000022124	Fbxl3	50789	4452.06	0.642052	0.0530495	12.1029	1.01963e-33	3.75828e-32
ENSMUSG00000030707	Coro1a	12721	10374.4	0.565678	0.0467978	12.0877	1.2267e-33	4.51178e-32
ENSMUSG00000051510	Mafg	17134	5233.73	0.55029	0.0455657	12.0768	1.40006e-33	5.13827e-32
ENSMUSG00000024737	Slc15a3	65221	3452.17	0.845541	0.070037	12.0728	1.47085e-33	5.38648e-32
ENSMUSG00000021493	Pdlim7	67399	795.559	1.13833	0.0943842	12.0606	1.70631e-33	6.23535e-32
ENSMUSG00000038459	Abhd17c	70178	4727.5	0.539185	0.0447129	12.0588	1.74224e-33	6.35301e-32
ENSMUSG00000030671	Pde3b	18576	5268.48	0.63412	0.0526656	12.0405	2.17618e-33	7.91841e-32
ENSMUSG00000049327	Kmt5a	67956	5387.24	0.633465	0.0526202	12.0384	2.23173e-33	8.10322e-32
ENSMUSG00000036002	Fam214b	230088	2202.31	0.666997	0.0554689	12.0247	2.63514e-33	9.54763e-32
ENSMUSG00000070923	Klhl9	242521	3817.26	-0.656344	0.0546574	-12.0083	3.21247e-33	1.16147e-31
ENSMUSG00000032788	Pdxk	216134	5859.76	-0.691349	0.0576071	-12.0011	3.50555e-33	1.26475e-31
ENSMUSG00000048376	F2r	14062	132.818	2.43798	0.203178	11.9993	3.58456e-33	1.29052e-31
ENSMUSG00000069135	Fgfr1op	75296	1362.7	0.774812	0.0646208	11.9901	4.00286e-33	1.43807e-31
ENSMUSG00000024300	Myo1f	17916	34582.6	-0.37741	0.0314926	-11.9841	4.30488e-33	1.54332e-31
ENSMUSG00000020589	Fam49a	76820	1301.15	-1.1329	0.0946719	-11.9666	5.3164e-33	1.90195e-31
ENSMUSG00000003038	Hmgn2	15331	3305.46	0.574677	0.0481193	11.9427	7.08531e-33	2.52947e-31
ENSMUSG00000032462	Pik3cb	74769	4905.07	0.541334	0.0453593	11.9344	7.83646e-33	2.79178e-31
ENSMUSG00000081534	Slc48a1	67739	22417.7	0.46403	0.0389505	11.9133	1.00866e-32	3.58589e-31
ENSMUSG00000032405	Pias1	56469	4528.14	-0.579144	0.0487732	-11.8742	1.61132e-32	5.71651e-31
ENSMUSG00000028031	Dkk2	56811	1098.78	-1.3986	0.117789	-11.8739	1.61844e-32	5.72981e-31
ENSMUSG00000058163	Gm5431	432555	3150.08	-1.13991	0.0960086	-11.873	1.6358e-32	5.77925e-31
ENSMUSG00000041268	Dmxl2	235380	1904.79	0.768417	0.0647289	11.8713	1.66829e-32	5.88183e-31
ENSMUSG00000066026	Dhrs3	20148	22128.7	-0.411701	0.0347577	-11.8449	2.28696e-32	8.04641e-31
ENSMUSG00000035376	Hacd2	70757	2248.3	0.632833	0.0534611	11.8373	2.50507e-32	8.79565e-31
ENSMUSG00000059994	Fcrl1	229499	704.541	-1.18459	0.100253	-11.816	3.22828e-32	1.13116e-30
ENSMUSG00000001467	Cyp51	13121	1432.69	0.803922	0.0681261	11.8005	3.87972e-32	1.35663e-30
ENSMUSG00000031827	Cotl1	72042	6006.57	0.685383	0.0580867	11.7993	3.93535e-32	1.37326e-30
ENSMUSG00000027293	Ehd4	98878	14761.8	-0.59426	0.050419	-11.7864	4.5855e-32	1.59686e-30
ENSMUSG00000061288	Taok3	330177	5407.99	-0.526264	0.044765	-11.7561	6.56711e-32	2.28227e-30
ENSMUSG00000031770	Herpud1	64209	2951	0.661608	0.0564331	11.7238	9.63062e-32	3.34012e-30
ENSMUSG00000029328	Hnrnpdl	50926	2029.53	0.696076	0.0593809	11.7222	9.80474e-32	3.39359e-30
ENSMUSG00000002881	Nab1	17936	6391.18	0.69107	0.0589571	11.7216	9.88248e-32	3.41357e-30
ENSMUSG00000020100	Slc29a3	71279	7669.89	-0.617975	0.0528641	-11.6899	1.43589e-31	4.94977e-30
ENSMUSG00000029430	Ran	19384	10007.3	0.446809	0.0382314	11.687	1.48615e-31	5.11265e-30
ENSMUSG00000027227	Sord	20322	3052.51	-0.619337	0.0530337	-11.6782	1.64799e-31	5.658e-30
ENSMUSG00000038886	Man2a2	140481	8155.93	-0.647514	0.0554812	-11.6709	1.7958e-31	6.15305e-30
ENSMUSG00000052688	Rab7b	226421	11418.5	0.444799	0.0381674	11.6539	2.19212e-31	7.49592e-30
ENSMUSG00000029468	P2rx7	18439	7717.23	-0.567305	0.0486806	-11.6536	2.19933e-31	7.50548e-30
ENSMUSG00000032475	Nck1	17973	2102.93	0.646462	0.0554952	11.649	2.32253e-31	7.91006e-30
ENSMUSG00000003200	Sh3gl1	20405	6004.72	-0.442015	0.0379865	-11.6361	2.70054e-31	9.17914e-30
ENSMUSG00000001248	Gramd1a	52857	3820.43	0.686308	0.0589841	11.6355	2.72074e-31	9.22939e-30
ENSMUSG00000018042	Cyb5r3	109754	12696.4	0.476762	0.0410121	11.6249	3.07863e-31	1.04227e-29
ENSMUSG00000038366	Lasp1	16796	18843.2	0.376973	0.0324345	11.6226	3.16379e-31	1.06897e-29
ENSMUSG00000034854	Mfsd12	73822	12342.9	-0.430942	0.0370933	-11.6178	3.34771e-31	1.12888e-29
ENSMUSG00000054517	Trim65	338364	1040.55	-0.783913	0.0675257	-11.6091	3.70458e-31	1.24675e-29
ENSMUSG00000030057	Cnbp	12785	15302.8	0.332209	0.0286857	11.581	5.14309e-31	1.72745e-29
ENSMUSG00000021754	Map3k1	26401	2770.63	-0.695899	0.0601733	-11.5649	6.20465e-31	2.0799e-29
ENSMUSG00000059089	Fcgr4	246256	1405.02	-0.97624	0.0844343	-11.5621	6.41002e-31	2.14452e-29
ENSMUSG00000024180	Tmem8	60455	3015.01	-0.773359	0.0669321	-11.5544	7.01446e-31	2.34214e-29
ENSMUSG00000021838	Samd4	74480	291.532	-1.57172	0.136073	-11.5505	7.33583e-31	2.44465e-29
ENSMUSG00000053286	Trmt1l	98685	1563.05	-0.665616	0.0577168	-11.5325	9.0523e-31	3.01077e-29
ENSMUSG00000070729	Gm12966	622469	903.901	0.909041	0.0789482	11.5144	1.11643e-30	3.70598e-29
ENSMUSG00000021360	Gcnt2	14538	354.872	1.74634	0.151769	11.5066	1.22188e-30	4.04812e-29
ENSMUSG00000028347	Tmeff1	230157	98.9454	2.95874	0.257635	11.4842	1.58376e-30	5.23687e-29
ENSMUSG00000038116	Phf20	228829	3672.65	-0.586813	0.0512712	-11.4453	2.48293e-30	8.19414e-29
ENSMUSG00000024672	Ms4a7	109225	35812	-0.399761	0.034932	-11.444	2.51986e-30	8.29994e-29
ENSMUSG00000059923	Grb2	14784	12182.3	-0.297717	0.026058	-11.4252	3.13063e-30	1.02918e-28
ENSMUSG00000020841	Cpd	12874	28121.3	0.658655	0.0576723	11.4207	3.29738e-30	1.08191e-28
ENSMUSG00000026080	Chst10	98388	1285.29	1.06209	0.0930418	11.4152	3.51088e-30	1.14954e-28
ENSMUSG00000052397	Ezr	22350	2132.6	0.685307	0.0600354	11.4151	3.51699e-30	1.14954e-28
ENSMUSG00000018930	Ccl4	20303	4471.4	1.02284	0.0896173	11.4134	3.58334e-30	1.16898e-28
ENSMUSG00000046711	Hmga1	15361	2955.59	0.796097	0.0698239	11.4015	4.11036e-30	1.33834e-28
ENSMUSG00000033685	Ucp2	22228	36428	0.468464	0.0411195	11.3928	4.54334e-30	1.47369e-28
ENSMUSG00000029999	Tgfa	21802	611.751	-1.03382	0.0907965	-11.3861	4.9027e-30	1.58723e-28
ENSMUSG00000023030	Slc11a2	18174	8825.99	0.378683	0.033276	11.3801	5.25638e-30	1.6985e-28
ENSMUSG00000049866	Arl4c	320982	4417.87	0.485744	0.042707	11.3739	5.64239e-30	1.81978e-28
ENSMUSG00000039062	Anpep	16790	9335	-0.808513	0.0711687	-11.3605	6.57628e-30	2.11697e-28
ENSMUSG00000049076	Acap2	78618	5191.01	-0.448137	0.0394549	-11.3582	6.75148e-30	2.16926e-28
ENSMUSG00000026875	Traf1	22029	274.927	3.74667	0.331178	11.3132	1.12913e-29	3.61429e-28
ENSMUSG00000094530	Gm21399	100862012	10460.5	0.485887	0.0429962	11.3007	1.30147e-29	4.1581e-28
ENSMUSG00000047592	Nxpe5	381680	1248.1	-0.974365	0.0862436	-11.2978	1.34493e-29	4.28893e-28
ENSMUSG00000043008	Klhl6	239743	2898.37	-0.592067	0.0524192	-11.2949	1.39136e-29	4.42868e-28
ENSMUSG00000034437	Gm9761	100043705	1155.16	0.833685	0.0740489	11.2586	2.1016e-29	6.67688e-28
ENSMUSG00000044066	Cep68	216543	1516.41	-0.765018	0.0680295	-11.2454	2.44036e-29	7.73872e-28
ENSMUSG00000037731	Themis2	230787	5559.45	-0.865952	0.0772003	-11.2169	3.36685e-29	1.06569e-27
ENSMUSG00000028874	Fgr	14191	218.491	1.99466	0.177865	11.2144	3.46386e-29	1.09436e-27
ENSMUSG00000046679	C87436	232196	1012.24	-0.780385	0.0696399	-11.206	3.81039e-29	1.20161e-27
ENSMUSG00000024404	Riok3	66878	9491.32	0.514862	0.045998	11.1931	4.40561e-29	1.38675e-27
ENSMUSG00000034595	Ppp1r18	76448	5375.35	0.406056	0.0363219	11.1794	5.14513e-29	1.61654e-27
ENSMUSG00000029103	Lrpap1	16976	10476.6	0.42901	0.0384282	11.1639	6.12161e-29	1.9198e-27
ENSMUSG00000022707	Gbe1	74185	2899.02	0.61905	0.055638	11.1264	9.33386e-29	2.92181e-27
ENSMUSG00000056612	Ppp1r14b	18938	3509.73	0.817877	0.073517	11.125	9.48045e-29	2.96225e-27
ENSMUSG00000045165	AI467606	101602	1778.93	-0.663444	0.0596471	-11.1228	9.7159e-29	3.03026e-27
ENSMUSG00000029465	Arpc3	56378	12902.3	0.452907	0.0407333	11.1188	1.01599e-28	3.16293e-27
ENSMUSG00000025742	Prps2	110639	7244.26	-0.662684	0.0596096	-11.1171	1.03605e-28	3.21951e-27
ENSMUSG00000006398	Cdc20	107995	543.57	-1.08368	0.0977263	-11.0889	1.42035e-28	4.40569e-27
ENSMUSG00000028191	Bcl10	12042	4297.88	0.47489	0.0428287	11.0881	1.43261e-28	4.43561e-27
ENSMUSG00000073802	Cdkn2b	12579	301.53	1.39878	0.126426	11.0641	1.87398e-28	5.79165e-27
ENSMUSG00000036333	Kidins220	77480	6139.95	-0.510253	0.0461738	-11.0507	2.17475e-28	6.70904e-27
ENSMUSG00000020598	Nrcam	319504	2734.14	-0.710746	0.0643779	-11.0402	2.44463e-28	7.52796e-27
ENSMUSG00000038181	Chpf2	100910	4101.82	0.553833	0.0501725	11.0386	2.48968e-28	7.65283e-27
ENSMUSG00000025509	Pnpla2	66853	3863.87	-0.487431	0.0442797	-11.008	3.49666e-28	1.07288e-26
ENSMUSG00000037257	Aagab	66939	4529.57	-0.509964	0.046334	-11.0063	3.56452e-28	1.09173e-26
ENSMUSG00000018362	Kpna2	16647	4100.35	0.543758	0.0494382	10.9987	3.87524e-28	1.18477e-26
ENSMUSG00000045404	Kcnk13	217826	3668.19	0.480526	0.0436965	10.9969	3.95512e-28	1.20702e-26
ENSMUSG00000040723	Rcsd1	226594	3070.91	-0.482164	0.0438547	-10.9946	4.0578e-28	1.23614e-26
ENSMUSG00000051341	Zfp52	22710	838.67	0.912882	0.0830839	10.9875	4.39036e-28	1.33506e-26
ENSMUSG00000074978	Actg-ps1	621269	1036.06	0.738229	0.0672248	10.9815	4.6913e-28	1.42403e-26
ENSMUSG00000074874	Ctla2b	13025	2879.57	0.823149	0.075015	10.9731	5.14639e-28	1.55939e-26
ENSMUSG00000020260	Pofut2	80294	4118.3	0.522084	0.0475956	10.9692	5.37746e-28	1.62651e-26
ENSMUSG00000027199	Gatm	67092	33701.5	0.495407	0.0452103	10.9578	6.09403e-28	1.83803e-26
ENSMUSG00000025241	Fyco1	17281	1866.63	-0.660791	0.0603034	-10.9578	6.09834e-28	1.83803e-26
ENSMUSG00000001768	Rin2	74030	10748.8	-0.571125	0.0522059	-10.9399	7.43216e-28	2.23608e-26
ENSMUSG00000073563	Csnk1g3	70425	2778.58	0.576502	0.0527467	10.9296	8.31897e-28	2.49848e-26
ENSMUSG00000022285	Ywhaz	22631	26184.1	0.389537	0.035679	10.9178	9.47273e-28	2.83998e-26
ENSMUSG00000036833	Pnpla7	241274	10201.6	-0.443098	0.0405859	-10.9175	9.50623e-28	2.84502e-26
ENSMUSG00000054717	Hmgb2	97165	2441.31	0.668063	0.0612139	10.9136	9.92694e-28	2.96572e-26
ENSMUSG00000021930	Spryd7	66674	1432.56	0.706917	0.0647792	10.9127	1.00227e-27	2.98908e-26
ENSMUSG00000032860	P2ry2	18442	1756.67	0.645302	0.0591556	10.9086	1.04903e-27	3.12307e-26
ENSMUSG00000031808	Slc27a1	26457	6270.96	0.548373	0.0503018	10.9017	1.13178e-27	3.36354e-26
ENSMUSG00000055024	Ep300	328572	4705.11	-0.830632	0.0762292	-10.8965	1.19775e-27	3.55338e-26
ENSMUSG00000020818	Mfsd11	69900	5969.05	-0.571402	0.0525252	-10.8786	1.45737e-27	4.31611e-26
ENSMUSG00000048118	Arid4a	238247	1708.97	-0.636835	0.0585419	-10.8783	1.46296e-27	4.32513e-26
ENSMUSG00000031604	Msmo1	66234	3433.37	0.575686	0.0529306	10.8762	1.49599e-27	4.41511e-26
ENSMUSG00000031207	Msn	17698	64624	0.316329	0.0291144	10.865	1.69169e-27	4.98406e-26
ENSMUSG00000028708	Mknk1	17346	4397.93	-0.494895	0.0455778	-10.8582	1.82212e-27	5.35905e-26
ENSMUSG00000021282	Eif5	217869	9618.05	0.531766	0.0490107	10.85	1.99406e-27	5.85462e-26
ENSMUSG00000032725	Folr2	14276	4049.1	0.547699	0.0505005	10.8454	2.09675e-27	6.14553e-26
ENSMUSG00000018583	G3bp1	27041	8995.47	0.433646	0.0400297	10.8331	2.39871e-27	7.0185e-26
ENSMUSG00000019432	Ddx39b	53817	3724.96	0.455887	0.0420853	10.8325	2.41566e-27	7.05597e-26
ENSMUSG00000059796	Eif4a1	13681	27770.5	0.533467	0.0492576	10.8301	2.47756e-27	7.22437e-26
ENSMUSG00000039087	Rreb1	68750	3570.21	-0.817195	0.0754719	-10.8278	2.54182e-27	7.39907e-26
ENSMUSG00000025372	Baiap2	108100	2834.28	-0.575732	0.0532232	-10.8173	2.85012e-27	8.28236e-26
ENSMUSG00000026365	Cfh	12628	34860.3	-0.479162	0.0443088	-10.8141	2.95057e-27	8.55967e-26
ENSMUSG00000043300	B3galnt1	26879	4036.18	-0.475002	0.0439438	-10.8093	3.10968e-27	9.00591e-26
ENSMUSG00000035107	Dcbld2	73379	1804.19	0.928367	0.0858979	10.8078	3.1617e-27	9.14102e-26
ENSMUSG00000048621	Gm6377	622976	345.901	1.75696	0.162611	10.8047	3.26969e-27	9.4372e-26
ENSMUSG00000017774	Myo1c	17913	9626.88	0.387697	0.0360467	10.7554	5.589e-27	1.61041e-25
ENSMUSG00000062232	Rapgef2	76089	3599.83	0.919105	0.0854935	10.7506	5.88869e-27	1.69389e-25
ENSMUSG00000038024	Dennd4c	329877	5753.06	-0.876012	0.0815037	-10.7481	6.04778e-27	1.73672e-25
ENSMUSG00000033192	Lpcat2	270084	11232.4	0.583182	0.0542607	10.7478	6.07063e-27	1.74035e-25
ENSMUSG00000028980	H6pd	100198	4518.54	0.508239	0.0473229	10.7398	6.61802e-27	1.89409e-25
ENSMUSG00000039908	Slc26a11	268512	2575.9	-1.00901	0.0940117	-10.7328	7.14249e-27	2.04076e-25
ENSMUSG00000037533	Rapgef6	192786	2644.65	-0.620576	0.0579581	-10.7073	9.40412e-27	2.68246e-25
ENSMUSG00000039844	Rapgef1	107746	4300.14	0.569	0.0531603	10.7035	9.80351e-27	2.7917e-25
ENSMUSG00000026271	Gpr35	64095	591.376	1.07656	0.100604	10.701	1.00727e-26	2.86358e-25
ENSMUSG00000078249	Hmga1b	111241	2761.45	0.744867	0.0696388	10.6961	1.06104e-26	3.01142e-25
ENSMUSG00000032750	Gab3	210710	612.909	-1.09405	0.102537	-10.6698	1.40958e-26	3.98733e-25
ENSMUSG00000022201	Zfr	22763	5213.95	-0.409642	0.0384544	-10.6527	1.69424e-26	4.7767e-25
ENSMUSG00000020605	Hs1bp3	58240	2768.64	-0.526226	0.0494177	-10.6485	1.77145e-26	4.98611e-25
ENSMUSG00000026880	Stom	13830	13772.8	-0.305288	0.0286744	-10.6467	1.80667e-26	5.07687e-25
ENSMUSG00000055148	Klf2	16598	709.998	1.06564	0.100287	10.6259	2.25802e-26	6.33472e-25
ENSMUSG00000031596	Slc7a2	11988	657.213	0.955258	0.0899335	10.6218	2.35915e-26	6.60757e-25
ENSMUSG00000002428	Hltf	20585	2812.78	-0.509679	0.048072	-10.6024	2.9038e-26	8.10635e-25
ENSMUSG00000029254	Stap1	56792	2225.68	0.677056	0.0639087	10.5941	3.17368e-26	8.84527e-25
ENSMUSG00000041225	Arhgap12	75415	4159.64	-0.536929	0.0506844	-10.5936	3.19104e-26	8.87911e-25
ENSMUSG00000003849	Nqo1	18104	271.067	1.60494	0.151534	10.5913	3.27062e-26	9.0857e-25
ENSMUSG00000063694	Cycs	13063	4258.31	0.553863	0.0523028	10.5895	3.33207e-26	9.24135e-25
ENSMUSG00000035064	Eef2k	13631	1686.1	-0.776736	0.0733597	-10.5881	3.38567e-26	9.37474e-25
ENSMUSG00000040848	Sft2d2	108735	8487.71	-0.53835	0.0508888	-10.5789	3.73123e-26	1.03148e-24
ENSMUSG00000027424	Mgme1	74528	1056.09	-0.86653	0.0819743	-10.5708	4.07191e-26	1.12383e-24
ENSMUSG00000027397	Slc20a1	20515	1105.97	0.957287	0.0905865	10.5677	4.20846e-26	1.15964e-24
ENSMUSG00000085295	4930430E12Rik	71639	2025.52	0.799655	0.0757995	10.5496	5.10126e-26	1.40338e-24
ENSMUSG00000017737	Mmp9	17395	32846.1	0.412521	0.0391185	10.5454	5.33325e-26	1.46484e-24
ENSMUSG00000023068	Nus1	52014	4234.81	0.758061	0.0721637	10.5047	8.21509e-26	2.25273e-24
ENSMUSG00000041075	Fzd7	14369	2788.15	0.671008	0.0639898	10.4862	9.99932e-26	2.7376e-24
ENSMUSG00000031781	Ciapin1	109006	1191.85	0.826201	0.0789322	10.4672	1.22161e-25	3.33378e-24
ENSMUSG00000031488	Rab11fip1	75767	600.059	0.942374	0.0903013	10.4359	1.70019e-25	4.62519e-24
ENSMUSG00000020092	Pald1	27355	3133.14	0.84997	0.0814468	10.4359	1.70026e-25	4.62519e-24
ENSMUSG00000032253	Phip	83946	2654.38	-0.745602	0.0715377	-10.4225	1.95726e-25	5.31581e-24
ENSMUSG00000066621	Tecpr1	70381	10519	-0.435463	0.0418133	-10.4145	2.13002e-25	5.77581e-24
ENSMUSG00000015697	Setdb1	84505	3386.03	-0.507966	0.0488104	-10.4069	2.30559e-25	6.24195e-24
ENSMUSG00000063406	Tmed5	73130	5334.04	0.427154	0.0410763	10.399	2.50455e-25	6.76983e-24
ENSMUSG00000000568	Hnrnpd	11991	2935.68	0.504253	0.0485064	10.3956	2.59622e-25	7.00651e-24
ENSMUSG00000047798	Cd300lf	246746	1375.92	1.13617	0.10934	10.3912	2.7187e-25	7.32542e-24
ENSMUSG00000058258	Idi1	319554	992.936	0.804875	0.0774991	10.3856	2.88325e-25	7.75653e-24
ENSMUSG00000005667	Mthfd2	17768	3433.39	0.680279	0.0655178	10.3831	2.95932e-25	7.94863e-24
ENSMUSG00000040687	Madd	228355	4371.16	-0.523851	0.0504583	-10.3818	2.99932e-25	8.04337e-24
ENSMUSG00000037266	Rsrp1	27981	22712.2	-0.804949	0.0776062	-10.3722	3.31692e-25	8.8811e-24
ENSMUSG00000068551	Zfp467	68910	898.733	-0.704631	0.0681604	-10.3378	4.75174e-25	1.27029e-23
ENSMUSG00000027221	Chst1	76969	182.176	1.82685	0.176899	10.3271	5.3149e-25	1.41861e-23
ENSMUSG00000022565	Plec	18810	7251.25	0.820922	0.0795291	10.3223	5.58728e-25	1.48898e-23
ENSMUSG00000000730	Dnmt3l	54427	166.688	2.45953	0.238626	10.3071	6.54614e-25	1.74178e-23
ENSMUSG00000028019	Pdgfc	54635	738.613	-0.899788	0.0873256	-10.3038	6.77079e-25	1.79875e-23
ENSMUSG00000002233	Rhoc	11853	5292.84	0.490124	0.0475682	10.3036	6.78564e-25	1.79989e-23
ENSMUSG00000042406	Atf4	11911	7035.83	0.460943	0.0448615	10.2748	9.15326e-25	2.42412e-23
ENSMUSG00000001783	Rtcb	28088	5161.96	0.37826	0.0368343	10.2692	9.6957e-25	2.56379e-23
ENSMUSG00000061175	Fnip2	329679	11470.8	-0.554328	0.0540794	-10.2503	1.18019e-24	3.11587e-23
ENSMUSG00000058922	Gm10052	654467	757.617	0.97243	0.094896	10.2473	1.2166e-24	3.20705e-23
ENSMUSG00000079884	Gm10698	100862175	9007.88	0.387596	0.0378475	10.241	1.2987e-24	3.41816e-23
ENSMUSG00000016319	Slc25a5	11740	11140.9	0.405277	0.0396039	10.2333	1.40677e-24	3.69691e-23
ENSMUSG00000023088	Abcc1	17250	10933	0.485827	0.0475303	10.2214	1.58995e-24	4.17185e-23
ENSMUSG00000000134	Tfe3	209446	7008.72	0.356663	0.0349357	10.2091	1.80453e-24	4.72759e-23
ENSMUSG00000032578	Cish	12700	93.048	3.25644	0.319068	10.2061	1.8623e-24	4.87144e-23
ENSMUSG00000032218	Ccnb2	12442	610.314	-1.18338	0.115961	-10.205	1.88364e-24	4.91972e-23
ENSMUSG00000048600	Gm5763	436235	272.241	1.43281	0.140489	10.1987	2.00965e-24	5.24079e-23
ENSMUSG00000026078	Pdcl3	68833	3322.45	0.452848	0.0444256	10.1934	2.12203e-24	5.52538e-23
ENSMUSG00000083282	Ctsf	56464	2666.98	-0.534205	0.0524157	-10.1917	2.15977e-24	5.61507e-23
ENSMUSG00000032038	St3gal4	20443	1097.18	-0.660487	0.0649504	-10.1691	2.72438e-24	7.07219e-23
ENSMUSG00000018171	Vmp1	75909	5952.16	0.519716	0.0511449	10.1616	2.94116e-24	7.6233e-23
ENSMUSG00000023977	Ubr2	224826	5141.45	-0.553513	0.0544888	-10.1583	3.04321e-24	7.86386e-23
ENSMUSG00000019122	Ccl9	20308	12030.1	0.641216	0.063122	10.1584	3.04158e-24	7.86386e-23
ENSMUSG00000031328	Flna	192176	45126.9	0.552527	0.0543951	10.1577	3.06333e-24	7.90386e-23
ENSMUSG00000039936	Pik3cd	18707	8538.4	-0.417531	0.0411122	-10.1559	3.11926e-24	8.03598e-23
ENSMUSG00000090213	Tmem189	407243	9804.6	0.39164	0.0385639	10.1556	3.12879e-24	8.04835e-23
ENSMUSG00000019790	Stxbp5	78808	4841.06	-0.499099	0.0491573	-10.1531	3.20989e-24	8.24453e-23
ENSMUSG00000025340	Rabgef1	56715	1789.64	0.661587	0.0652629	10.1373	3.77524e-24	9.68201e-23
ENSMUSG00000026229	Psmd1	70247	9355.03	0.426932	0.0421788	10.122	4.41468e-24	1.13049e-22
ENSMUSG00000035783	Acta2	11475	510.743	-1.81181	0.179035	-10.1199	4.51094e-24	1.1534e-22
ENSMUSG00000029416	Slc15a4	100561	3908.68	-0.567632	0.0562302	-10.0948	5.82559e-24	1.48731e-22
ENSMUSG00000021549	Rasa1	218397	5158.45	-0.481056	0.0476915	-10.0868	6.31856e-24	1.61076e-22
ENSMUSG00000074794	Arrdc3	105171	3964	-0.762496	0.0756003	-10.0859	6.37848e-24	1.6236e-22
ENSMUSG00000024013	Fgd2	26382	2244.45	-0.742694	0.0736541	-10.0835	6.53254e-24	1.66034e-22
ENSMUSG00000096592	Gm15801	627166	3265.38	0.706498	0.0702425	10.058	8.47081e-24	2.14977e-22
ENSMUSG00000038369	Ncoa6	56406	2238.92	-0.570026	0.0567362	-10.047	9.47396e-24	2.40077e-22
ENSMUSG00000036052	Dnajb5	56323	574.488	1.11645	0.111178	10.042	9.96233e-24	2.52078e-22
ENSMUSG00000069792	Wfdc17	100034251	20110.3	0.504406	0.0502701	10.0339	1.08145e-23	2.73233e-22
ENSMUSG00000001774	Chordc1	66917	2395.67	-0.503271	0.0501756	-10.0302	1.12288e-23	2.83282e-22
ENSMUSG00000020829	Slc46a1	52466	1646.31	0.535771	0.0534833	10.0175	1.27631e-23	3.21513e-22
ENSMUSG00000080875	Gm7332	654361	876.809	0.79957	0.0799563	10.0001	1.52268e-23	3.8301e-22
ENSMUSG00000001056	Nhp2	52530	1295.42	0.80506	0.0805929	9.98922	1.69914e-23	4.26764e-22
ENSMUSG00000055782	Abcd2	26874	3912.15	-0.665097	0.0666505	-9.97887	1.88605e-23	4.73013e-22
ENSMUSG00000019849	Prep	19072	3290.8	0.479783	0.0480899	9.97679	1.92599e-23	4.82318e-22
ENSMUSG00000030245	Golt1b	66964	2105.17	0.577975	0.0579398	9.97545	1.95212e-23	4.88144e-22
ENSMUSG00000092746	Rn7s6	109568	472.569	1.40389	0.140786	9.97183	2.02473e-23	5.05558e-22
ENSMUSG00000037926	Ssh2	237860	9923.84	-0.503046	0.0504485	-9.97148	2.03173e-23	5.06565e-22
ENSMUSG00000037960	Card19	68480	4753.84	0.438118	0.043988	9.95994	2.28197e-23	5.68123e-22
ENSMUSG00000021831	Ero1l	50527	4002.66	0.563076	0.0565893	9.95022	2.51616e-23	6.25514e-22
ENSMUSG00000037443	Cep85	70012	3341.35	0.545101	0.0547879	9.94929	2.53997e-23	6.30512e-22
ENSMUSG00000022108	Itm2b	16432	141474	-0.387361	0.0389406	-9.94749	2.58618e-23	6.4105e-22
ENSMUSG00000020198	Ap3d1	11776	10151.3	-0.313957	0.0315717	-9.94424	2.67207e-23	6.61375e-22
ENSMUSG00000026773	Pfkfb3	170768	2277.17	0.659189	0.0663537	9.93447	2.94743e-23	7.28472e-22
ENSMUSG00000027163	Commd9	76501	1677.38	0.759662	0.0764811	9.93268	3.00084e-23	7.406e-22
ENSMUSG00000002870	Mcm2	17216	2226.94	0.56716	0.0571037	9.9321	3.01816e-23	7.43796e-22
ENSMUSG00000031885	Cbfb	12400	4097.67	0.471081	0.0474365	9.93076	3.05915e-23	7.52808e-22
ENSMUSG00000020057	Dram1	71712	4507.23	0.63001	0.0634423	9.93044	3.06896e-23	7.54133e-22
ENSMUSG00000023067	Cdkn1a	12575	7065.94	0.747647	0.0753463	9.92281	3.31304e-23	8.12936e-22
ENSMUSG00000099875	Rbm3-ps	100043257	421.734	1.22716	0.123721	9.91875	3.45042e-23	8.45428e-22
ENSMUSG00000061458	Nol10	217431	592.924	0.835706	0.084273	9.91664	3.52404e-23	8.62226e-22
ENSMUSG00000036606	Plxnb2	140570	29852.4	-0.328152	0.0330941	-9.91572	3.55668e-23	8.68963e-22
ENSMUSG00000025212	Sfxn3	94280	3132.88	0.508029	0.0512714	9.90862	3.81897e-23	9.31709e-22
ENSMUSG00000071713	Csf2rb	12983	19706.5	0.562845	0.0568065	9.90811	3.83856e-23	9.35147e-22
ENSMUSG00000025232	Hexa	15211	60010.5	-0.359932	0.0363523	-9.90121	4.11263e-23	1.00049e-21
ENSMUSG00000028041	Adam15	11490	10489.9	0.512214	0.0517455	9.89871	4.21673e-23	1.02435e-21
ENSMUSG00000051391	Ywhag	22628	18943.7	0.350103	0.0353861	9.89381	4.42839e-23	1.07423e-21
ENSMUSG00000023186	Vwa5a	67776	11236.8	-0.350675	0.0354841	-9.8826	4.95331e-23	1.19986e-21
ENSMUSG00000021978	Extl3	54616	6529.66	0.524402	0.0531216	9.87173	5.52036e-23	1.33532e-21
ENSMUSG00000049037	Clec4a1	269799	1566.67	-0.965825	0.0978746	-9.86798	5.73074e-23	1.38424e-21
ENSMUSG00000074785	Plxnc1	54712	11860.1	-0.494054	0.0500782	-9.86565	5.86525e-23	1.41472e-21
ENSMUSG00000039852	Rere	68703	2304.32	-0.757709	0.0773422	-9.79684	1.16164e-22	2.79796e-21
ENSMUSG00000016921	Srsf6	67996	5195.67	0.369665	0.037743	9.79424	1.19186e-22	2.8667e-21
ENSMUSG00000094388	Gm8783	667723	2879.33	0.673513	0.0688223	9.78625	1.28989e-22	3.09811e-21
ENSMUSG00000018401	Mtmr4	170749	1924.26	-0.802544	0.08201	-9.78593	1.29397e-22	3.10353e-21
ENSMUSG00000001020	S100a4	20198	349.423	1.50344	0.153671	9.78346	1.32597e-22	3.17581e-21
ENSMUSG00000071660	Ttc9c	70387	1715.92	-0.622355	0.0636564	-9.7768	1.41622e-22	3.38719e-21
ENSMUSG00000018931	Natd1	24083	2623.42	-0.611468	0.0625812	-9.7708	1.50256e-22	3.58864e-21
ENSMUSG00000032698	Lmo2	16909	9523.52	-0.334314	0.0342192	-9.7698	1.51754e-22	3.61935e-21
ENSMUSG00000041058	Wwp1	107568	12631.7	-0.738642	0.0758124	-9.74301	1.97604e-22	4.70629e-21
ENSMUSG00000013089	Etv5	104156	6237.61	0.450429	0.0462679	9.73523	2.13325e-22	5.07362e-21
ENSMUSG00000070713	Gm10282	100042405	1158.68	0.606666	0.06235	9.73001	2.24575e-22	5.33374e-21
ENSMUSG00000048865	Arhgap30	226652	9582.6	-0.359414	0.0369604	-9.72431	2.37514e-22	5.62534e-21
ENSMUSG00000028459	Cd72	12517	6508.42	-0.616314	0.0633784	-9.72436	2.3739e-22	5.62534e-21
ENSMUSG00000068220	Lgals1	16852	20237.5	0.49447	0.0508506	9.72396	2.38332e-22	5.63688e-21
ENSMUSG00000018593	Sparc	20692	665.409	-1.18922	0.122376	-9.71781	2.5316e-22	5.97929e-21
ENSMUSG00000022125	Cln5	211286	6504.59	0.515512	0.0530549	9.71659	2.56221e-22	6.04319e-21
ENSMUSG00000070476	Fam217b	71532	353.231	1.12581	0.115887	9.71474	2.60926e-22	6.14566e-21
ENSMUSG00000054079	Utp18	217109	1223.81	0.606212	0.0625337	9.69415	3.19276e-22	7.50959e-21
ENSMUSG00000023026	Dip2b	239667	3695.56	-0.526974	0.0543692	-9.6925	3.24482e-22	7.62152e-21
ENSMUSG00000063889	Crem	12916	1094.83	0.788324	0.0815864	9.66244	4.35385e-22	1.02123e-20
ENSMUSG00000031146	Plp2	18824	1768.52	0.552373	0.0571775	9.66068	4.42926e-22	1.0375e-20
ENSMUSG00000020399	Havcr2	171285	1260.71	0.917075	0.0949759	9.65587	4.64185e-22	1.0858e-20
ENSMUSG00000000530	Acvrl1	11482	2123.91	0.561564	0.0581888	9.65073	4.88067e-22	1.14009e-20
ENSMUSG00000101188	Eif4a-ps4	13674	8611.16	0.557753	0.0578397	9.64308	5.25847e-22	1.22666e-20
ENSMUSG00000056069	Otulinl	223433	6088.36	-0.547658	0.0568623	-9.6313	5.89769e-22	1.3739e-20
ENSMUSG00000022807	Osbpl11	106326	5700.57	-0.427778	0.0445735	-9.59714	8.21915e-22	1.91207e-20
ENSMUSG00000030016	Zfp638	18139	3357.73	-0.536803	0.0559377	-9.59645	8.27492e-22	1.92242e-20
ENSMUSG00000020593	Lpin1	14245	1184.9	-0.679916	0.0708575	-9.59554	8.34825e-22	1.93682e-20
ENSMUSG00000074607	Tox2	269389	734.15	-0.853657	0.0889777	-9.59405	8.46919e-22	1.9622e-20
ENSMUSG00000031429	Psmd10	53380	2378.52	0.553212	0.0576794	9.59116	8.70984e-22	2.01522e-20
ENSMUSG00000024691	Fam111a	107373	3977.35	-0.504836	0.0527123	-9.57718	9.97273e-22	2.30428e-20
ENSMUSG00000052684	Jun	16476	4821.49	0.490873	0.0513424	9.56078	1.1687e-21	2.69672e-20
ENSMUSG00000002944	Cd36	12491	51442.7	0.460448	0.048175	9.55781	1.20271e-21	2.77143e-20
ENSMUSG00000021886	Gpr65	14744	5678.29	0.467036	0.0488929	9.55224	1.26923e-21	2.92076e-20
ENSMUSG00000026926	Pmpca	66865	4421.05	0.397985	0.0416658	9.55185	1.27401e-21	2.92783e-20
ENSMUSG00000020205	Phlda1	21664	62.3994	2.67633	0.280381	9.54532	1.35686e-21	3.11401e-20
ENSMUSG00000016382	Pls3	102866	2495.09	0.573699	0.0601075	9.54456	1.36687e-21	3.13277e-20
ENSMUSG00000028367	Txn1	22166	10396.9	0.371091	0.0388844	9.54343	1.38187e-21	3.16289e-20
ENSMUSG00000024521	Pmaip1	58801	1049.09	0.641289	0.0672053	9.54224	1.39778e-21	3.195e-20
ENSMUSG00000027613	Eif6	16418	4174.18	0.536818	0.0562589	9.54194	1.4019e-21	3.20014e-20
ENSMUSG00000021639	Gtf2h2	23894	942.932	0.706235	0.0740551	9.53661	1.47584e-21	3.36441e-20
ENSMUSG00000029401	Rilpl2	80291	2990.2	0.463134	0.0485749	9.53442	1.50723e-21	3.43138e-20
ENSMUSG00000026357	Rgs18	64214	418.903	-0.932632	0.0978943	-9.52692	1.62017e-21	3.68356e-20
ENSMUSG00000033952	Aspm	12316	277.443	-1.53675	0.161655	-9.50639	1.97387e-21	4.48173e-20
ENSMUSG00000078515	Ddi2	68817	4630.94	-0.491061	0.0517267	-9.49337	2.2368e-21	5.07198e-20
ENSMUSG00000029390	Tmed2	56334	21734.4	0.333311	0.0351392	9.48546	2.41306e-21	5.46437e-20
ENSMUSG00000002957	Ap2a2	11772	8885.07	-0.419939	0.0443592	-9.46679	2.88564e-21	6.52583e-20
ENSMUSG00000034488	Edil3	13612	237.535	1.6374	0.172969	9.46643	2.89565e-21	6.53978e-20
ENSMUSG00000005142	Man2b1	17159	40786.9	-0.315024	0.0332856	-9.46426	2.95634e-21	6.66802e-20
ENSMUSG00000027763	Mbnl1	56758	25056.6	-0.304002	0.0321424	-9.45799	3.13912e-21	7.06157e-20
ENSMUSG00000020358	Hnrnpab	15384	4872.84	0.578857	0.0612025	9.45805	3.13736e-21	7.06157e-20
ENSMUSG00000033392	Clasp2	76499	2977.32	-0.530602	0.0561124	-9.45607	3.19746e-21	7.18331e-20
ENSMUSG00000038642	Ctss	13040	82602.8	-0.395972	0.0420162	-9.42426	4.33155e-21	9.71831e-20
ENSMUSG00000028007	Snx7	76561	1274.49	0.601888	0.0639219	9.41599	4.68647e-21	1.05008e-19
ENSMUSG00000026932	Nacc2	67991	3299.35	-0.392228	0.041774	-9.38927	6.04181e-21	1.35198e-19
ENSMUSG00000097418	Mir155hg	100653389	49.7622	6.55058	0.697796	9.38753	6.14219e-21	1.37264e-19
ENSMUSG00000062901	Klhl24	75785	6563.19	-0.602137	0.0641458	-9.387	6.1733e-21	1.37779e-19
ENSMUSG00000058927	Gm10053	672195	2592.01	0.55353	0.0590475	9.37432	6.96249e-21	1.54986e-19
ENSMUSG00000028581	Laptm5	16792	101516	-0.350262	0.0373706	-9.37266	7.07258e-21	1.57231e-19
ENSMUSG00000001228	Uhrf1	18140	1057.42	1.00902	0.107678	9.37075	7.20195e-21	1.59898e-19
ENSMUSG00000018654	Ikzf1	22778	3819.09	-0.558954	0.0596844	-9.36516	7.59316e-21	1.68364e-19
ENSMUSG00000090841	Myl6	17904	11698.1	0.349367	0.0373291	9.35909	8.04237e-21	1.78093e-19
ENSMUSG00000071076	Jund	16478	1744.62	0.861951	0.0921508	9.3537	8.46325e-21	1.8717e-19
ENSMUSG00000024421	Lama3	16774	859.605	-1.01166	0.108197	-9.35016	8.75133e-21	1.9329e-19
ENSMUSG00000006611	Hfe	15216	3177.46	-0.497788	0.0534152	-9.31922	1.17197e-20	2.58517e-19
ENSMUSG00000058881	Zfp516	329003	3050.88	0.535408	0.0574992	9.31157	1.25953e-20	2.77472e-19
ENSMUSG00000022969	Il10rb	16155	6106.95	-0.323636	0.0347928	-9.3018	1.38083e-20	3.038e-19
ENSMUSG00000040433	Zbtb38	245007	2383.37	-0.588557	0.0633448	-9.29133	1.52372e-20	3.34806e-19
ENSMUSG00000016283	H2-M2	14990	403.146	2.45745	0.264694	9.28413	1.63039e-20	3.57782e-19
ENSMUSG00000022912	Pros1	19128	6787.1	-0.445364	0.0480337	-9.2719	1.8286e-20	4.00762e-19
ENSMUSG00000032359	Ctsh	13036	13544.9	-0.366328	0.0395359	-9.26572	1.93757e-20	4.241e-19
ENSMUSG00000027829	Ccnl1	56706	4070.86	0.609708	0.0658141	9.26409	1.96743e-20	4.30082e-19
ENSMUSG00000038244	Mical2	320878	962.911	0.91558	0.098868	9.26063	2.03238e-20	4.4371e-19
ENSMUSG00000015852	Fcrls	80891	40128.8	-0.295032	0.031887	-9.25242	2.19472e-20	4.78538e-19
ENSMUSG00000000326	Comt	12846	4750.24	-0.361801	0.0391112	-9.25057	2.2329e-20	4.8624e-19
ENSMUSG00000027598	Itch	16396	9053.71	-0.410728	0.0444309	-9.24419	2.37039e-20	5.15523e-19
ENSMUSG00000026355	Mcm6	17219	6293.4	0.500786	0.0542927	9.22382	2.86704e-20	6.22741e-19
ENSMUSG00000099397	Gm7809	665825	933.679	0.679717	0.0737568	9.21564	3.0942e-20	6.71224e-19
ENSMUSG00000024818	Slc25a45	107375	3178.57	-0.526229	0.0571465	-9.20841	3.31001e-20	7.17126e-19
ENSMUSG00000040133	Gpr176	381413	392.515	-0.961738	0.104444	-9.2082	3.31651e-20	7.17621e-19
ENSMUSG00000006494	Pdk1	228026	4028.07	0.603186	0.0656029	9.1945	3.76741e-20	8.14152e-19
ENSMUSG00000038806	Sde2	208768	1887.14	0.502347	0.0546375	9.19419	3.77822e-20	8.15455e-19
ENSMUSG00000031502	Col4a1	12826	655.572	-1.2519	0.136227	-9.18982	3.93487e-20	8.48189e-19
ENSMUSG00000050912	Tmem123	71929	9608.26	0.440868	0.04801	9.18283	4.19927e-20	9.04038e-19
ENSMUSG00000026728	Vim	22352	13348.1	0.376636	0.0410194	9.18189	4.23581e-20	9.10753e-19
ENSMUSG00000022811	Zfp148	22661	3495.33	-0.450864	0.049112	-9.18031	4.29845e-20	9.23055e-19
ENSMUSG00000020740	Gga3	260302	2774.97	-0.543468	0.0592041	-9.17958	4.32793e-20	9.28215e-19
ENSMUSG00000029863	Casp2	12366	1265.47	-0.64473	0.0702415	-9.17876	4.36093e-20	9.34117e-19
ENSMUSG00000004264	Phb2	12034	2701.3	0.427974	0.0466382	9.17647	4.45445e-20	9.52951e-19
ENSMUSG00000001632	Brpf1	78783	4031.87	0.46042	0.0501778	9.17578	4.48336e-20	9.57932e-19
ENSMUSG00000091269	Gm6682	626534	2126.51	0.561101	0.0611954	9.16901	4.77405e-20	1.01876e-18
ENSMUSG00000026234	Ncl	17975	9605.22	0.34751	0.0379113	9.1664	4.89065e-20	1.04234e-18
ENSMUSG00000055013	Agap1	347722	2207.86	0.591166	0.0645092	9.16406	4.99807e-20	1.0639e-18
ENSMUSG00000022385	Gtse1	29870	338.311	-1.17655	0.128392	-9.16378	5.01097e-20	1.06532e-18
ENSMUSG00000039826	Trub2	227682	1251.25	0.591127	0.0645609	9.15612	5.37986e-20	1.14231e-18
ENSMUSG00000026113	Inpp4a	269180	2287.17	-0.559081	0.0611077	-9.14911	5.7406e-20	1.21739e-18
ENSMUSG00000006920	Ezh1	14055	3525.03	-0.566788	0.0619821	-9.14439	5.99695e-20	1.27017e-18
ENSMUSG00000036718	Micall2	231830	276.934	1.09108	0.119689	9.11594	7.79889e-20	1.64978e-18
ENSMUSG00000029186	Pi4k2b	67073	1101.65	0.698044	0.0765931	9.11366	7.96481e-20	1.68279e-18
ENSMUSG00000022637	Cblb	208650	1459.05	-0.533876	0.0585884	-9.11232	8.0641e-20	1.70166e-18
ENSMUSG00000041313	Slc7a1	11987	1138.08	0.9087	0.0997386	9.11082	8.17626e-20	1.72319e-18
ENSMUSG00000028790	Khdrbs1	20218	4115.15	0.37382	0.0410369	9.10937	8.28584e-20	1.74412e-18
ENSMUSG00000031133	Arhgef6	73341	5309.32	-0.44398	0.048791	-9.09961	9.06539e-20	1.90586e-18
ENSMUSG00000058625	Gm17383	100191011	8466.1	0.394515	0.0433929	9.09171	9.74965e-20	2.04719e-18
ENSMUSG00000002897	Il17ra	16172	2793.04	0.519473	0.0572541	9.0731	1.15676e-19	2.42591e-18
ENSMUSG00000064127	Med14	26896	1849.44	0.581988	0.0641484	9.07251	1.16301e-19	2.43603e-18
ENSMUSG00000041762	Gpr155	68526	797.557	-1.00824	0.111277	-9.06059	1.29747e-19	2.71433e-18
ENSMUSG00000028420	Tmem38b	52076	1639.58	0.578821	0.0639069	9.05726	1.33772e-19	2.79509e-18
ENSMUSG00000052821	Cysltr1	58861	2211.92	-0.552771	0.0610487	-9.05459	1.37081e-19	2.86072e-18
ENSMUSG00000022744	Cldnd1	224250	2114.17	0.451129	0.0499218	9.03671	1.61465e-19	3.36546e-18
ENSMUSG00000027340	Slc23a2	54338	7333.03	0.35949	0.0398061	9.03101	1.70089e-19	3.53935e-18
ENSMUSG00000071714	Csf2rb2	12984	12204	0.458535	0.0507738	9.03093	1.70223e-19	3.53935e-18
ENSMUSG00000006304	Arpc2	76709	32149	0.259884	0.0287873	9.02773	1.7527e-19	3.63984e-18
ENSMUSG00000028644	Ermap	27028	57.6382	2.46283	0.272835	9.02681	1.76757e-19	3.66625e-18
ENSMUSG00000007041	Clic1	114584	15499.4	0.293942	0.0325708	9.02472	1.80159e-19	3.73227e-18
ENSMUSG00000031880	Rrad	56437	619.724	0.861394	0.0954648	9.02315	1.82755e-19	3.78145e-18
ENSMUSG00000021771	Vdac2	22334	9964.45	0.355759	0.0394389	9.02051	1.87212e-19	3.86898e-18
ENSMUSG00000032449	Slc25a36	192287	4439.25	-0.387231	0.0429323	-9.01957	1.88828e-19	3.89763e-18
ENSMUSG00000037656	Slc20a2	20516	749.244	0.734169	0.0814177	9.01731	1.92771e-19	3.97421e-18
ENSMUSG00000024222	Fkbp5	14229	1272.86	1.05294	0.116996	8.99981	2.26102e-19	4.65574e-18
ENSMUSG00000027363	Usp8	84092	9759.37	-0.363353	0.0403997	-8.99394	2.38518e-19	4.90546e-18
ENSMUSG00000041362	Shtn1	71653	2449.13	-0.548932	0.0610558	-8.99066	2.45749e-19	5.042e-18
ENSMUSG00000032369	Plscr1	22038	1226.95	0.589086	0.0655212	8.99077	2.45509e-19	5.042e-18
ENSMUSG00000038214	Bend3	331623	336.778	1.26245	0.140444	8.98899	2.49509e-19	5.11298e-18
ENSMUSG00000021892	Sh3bp5	24056	7020.26	0.410921	0.0457247	8.98686	2.54405e-19	5.20705e-18
ENSMUSG00000055866	Per2	18627	339.741	1.23058	0.137091	8.97636	2.79861e-19	5.72119e-18
ENSMUSG00000046157	Tmem229b	268567	2137.13	-0.591167	0.0658784	-8.97361	2.86949e-19	5.85906e-18
ENSMUSG00000025134	Alyref	21681	2838.54	0.386107	0.04304	8.97089	2.94131e-19	5.9985e-18
ENSMUSG00000038578	Susd1	634731	613.647	-0.791084	0.088248	-8.96433	3.12187e-19	6.35912e-18
ENSMUSG00000035493	Tgfbi	21810	2990.36	0.608301	0.067907	8.95785	3.31068e-19	6.73567e-18
ENSMUSG00000030084	Plxna1	18844	9971.33	-0.543312	0.060665	-8.95594	3.36867e-19	6.84548e-18
ENSMUSG00000021270	Hsp90aa1	15519	10146.2	0.348609	0.0389592	8.94804	3.61859e-19	7.34457e-18
ENSMUSG00000032560	Dnajc13	235567	7635.06	-0.443617	0.0496022	-8.9435	3.77041e-19	7.63964e-18
ENSMUSG00000051185	Fam174a	67698	4765.9	-0.333496	0.0372895	-8.94342	3.77294e-19	7.63964e-18
ENSMUSG00000028156	Eif4e	13684	5001.04	0.392463	0.0439342	8.93298	4.14677e-19	8.38662e-18
ENSMUSG00000020538	Srebf1	20787	2600.2	0.521011	0.0583347	8.93141	4.20613e-19	8.49658e-18
ENSMUSG00000026648	Dclre1c	227525	1576.25	-0.775926	0.0869242	-8.92647	4.39823e-19	8.87411e-18
ENSMUSG00000101625	Gm29371	102635830	37.6636	5.07595	0.569129	8.9188	4.71377e-19	9.4995e-18
ENSMUSG00000045362	Tnfrsf26	244237	1478.91	0.738284	0.0827809	8.91853	4.72518e-19	9.51125e-18
ENSMUSG00000027848	Olfml3	99543	2116.02	0.593411	0.0665469	8.91719	4.78271e-19	9.61567e-18
ENSMUSG00000027663	Zmat3	22401	736.198	-0.863762	0.0968729	-8.91645	4.81482e-19	9.66881e-18
ENSMUSG00000020696	Rffl	67338	2045.68	0.621238	0.0697142	8.91121	5.04775e-19	1.01246e-17
ENSMUSG00000029201	Ugdh	22235	3799.18	0.370818	0.0416356	8.90628	5.27736e-19	1.05727e-17
ENSMUSG00000023905	Tnfrsf12a	27279	358.786	0.909073	0.102166	8.89803	5.6845e-19	1.1375e-17
ENSMUSG00000032231	Anxa2	12306	12543.5	0.259741	0.0291918	8.89775	5.69885e-19	1.13903e-17
ENSMUSG00000019558	Slc6a8	102857	2115.88	0.55085	0.0619207	8.89606	5.78641e-19	1.15518e-17
ENSMUSG00000022855	Senp2	75826	5247.08	0.449672	0.05057	8.89207	5.99811e-19	1.19604e-17
ENSMUSG00000051223	Bzw1	66882	16284.3	0.339525	0.0381923	8.8899	6.11666e-19	1.21825e-17
ENSMUSG00000028233	Tgs1	116940	2815.34	-0.438969	0.0494212	-8.88221	6.55424e-19	1.30388e-17
ENSMUSG00000021423	Ly86	17084	14933.9	-0.373774	0.0420867	-8.88105	6.62328e-19	1.31608e-17
ENSMUSG00000026628	Atf3	11910	10449.8	0.404473	0.0455482	8.88012	6.67908e-19	1.32562e-17
ENSMUSG00000016257	Prelid3b	66390	1736.98	0.512326	0.0577199	8.87606	6.92683e-19	1.37319e-17
ENSMUSG00000085666	Gm9855	624784	895.948	0.837434	0.0943727	8.87369	7.07639e-19	1.39958e-17
ENSMUSG00000030282	Cmas	12764	3779.06	0.429025	0.0483479	8.87372	7.07434e-19	1.39958e-17
ENSMUSG00000093904	Tomm20	67952	5316.15	0.452553	0.0510202	8.87009	7.30848e-19	1.44381e-17
ENSMUSG00000041135	Ripk2	192656	823.058	0.83032	0.0936111	8.8699	7.32132e-19	1.44467e-17
ENSMUSG00000029338	Antxr2	71914	7342.15	-0.543831	0.0613908	-8.8585	8.10956e-19	1.59835e-17
ENSMUSG00000048677	Tpcn2	233979	2530.05	0.522509	0.0590357	8.85072	8.69594e-19	1.71194e-17
ENSMUSG00000026748	Plxdc2	67448	9039.41	-0.514029	0.0580812	-8.85017	8.73827e-19	1.71829e-17
ENSMUSG00000020612	Prkar1a	19084	21555.9	0.292047	0.0329997	8.84996	8.75476e-19	1.71943e-17
ENSMUSG00000026473	Glul	14645	3371.46	-0.367843	0.0415649	-8.84984	8.76424e-19	1.71943e-17
ENSMUSG00000043059	Zfp513	101023	1176.42	0.60282	0.0681423	8.84648	9.03253e-19	1.77002e-17
ENSMUSG00000036246	Gmip	78816	7358.35	-0.351824	0.0397713	-8.84619	9.05555e-19	1.77249e-17
ENSMUSG00000094627	Gm10182	100041826	1477.96	0.562022	0.0635359	8.84573	9.09292e-19	1.77777e-17
ENSMUSG00000045671	Spred2	114716	929.48	0.633936	0.0716745	8.84466	9.18094e-19	1.79291e-17
ENSMUSG00000078578	Ube2d3	66105	18476.3	0.331074	0.0374456	8.84147	9.44708e-19	1.84278e-17
ENSMUSG00000029762	Akr1b8	14187	1744.88	0.533552	0.060378	8.83685	9.8453e-19	1.91826e-17
ENSMUSG00000021486	Prelid1	66494	9489.83	0.392468	0.044443	8.8308	1.03927e-18	2.02259e-17
ENSMUSG00000022641	Bbx	70508	3235.31	-0.463861	0.0525576	-8.82577	1.08712e-18	2.11331e-17
ENSMUSG00000005800	Mmp8	17394	638.877	0.891779	0.101048	8.82531	1.09159e-18	2.11958e-17
ENSMUSG00000037260	Hgsnat	52120	17993.8	-0.294658	0.0333921	-8.82421	1.10238e-18	2.1381e-17
ENSMUSG00000030189	Ybx3	56449	1395.62	0.59027	0.0668949	8.82384	1.10602e-18	2.14272e-17
ENSMUSG00000024431	Nr3c1	14815	5837.46	-0.513502	0.0582487	-8.81569	1.18954e-18	2.3019e-17
ENSMUSG00000020520	Galnt10	171212	2067.77	-0.437158	0.0495921	-8.81507	1.19615e-18	2.31205e-17
ENSMUSG00000021134	Srsf5	20384	12289	0.52262	0.0593042	8.81254	1.22345e-18	2.36214e-17
ENSMUSG00000021365	Nedd9	18003	805.737	0.742982	0.0843852	8.80465	1.31262e-18	2.53143e-17
ENSMUSG00000073982	Rhog	56212	10167.1	0.401143	0.0455642	8.80392	1.32117e-18	2.54505e-17
ENSMUSG00000004100	Ppan	235036	854.008	0.650756	0.0740084	8.793	1.45617e-18	2.80193e-17
ENSMUSG00000048142	Nat8l	269642	756.716	-1.07051	0.121788	-8.78993	1.49649e-18	2.87626e-17
ENSMUSG00000027333	Smox	228608	4204.95	0.400434	0.0456144	8.77867	1.65418e-18	3.17576e-17
ENSMUSG00000035385	Ccl2	20296	2021.3	2.42401	0.276282	8.77368	1.72915e-18	3.31596e-17
ENSMUSG00000030254	Rad18	58186	482.227	0.889164	0.101348	8.77337	1.73398e-18	3.32148e-17
ENSMUSG00000042082	Arsb	11881	4865.12	0.367614	0.0419622	8.76061	1.94203e-18	3.71582e-17
ENSMUSG00000026434	Nucks1	98415	4326.01	0.380764	0.0434828	8.75666	2.01115e-18	3.84376e-17
ENSMUSG00000056917	Sipa1	20469	7575.49	-0.319969	0.0365425	-8.75608	2.02158e-18	3.85936e-17
ENSMUSG00000044629	Cnrip1	380686	930.075	-0.716346	0.0818775	-8.749	2.15257e-18	4.10482e-17
ENSMUSG00000002289	Angptl4	57875	368	-1.36453	0.155986	-8.74782	2.17521e-18	4.14336e-17
ENSMUSG00000054766	Set	56086	7636.83	0.381894	0.04368	8.74299	2.27017e-18	4.3194e-17
ENSMUSG00000004151	Etv1	14009	1909.53	0.51634	0.0590962	8.73727	2.38805e-18	4.53863e-17
ENSMUSG00000059866	Tnip2	231130	2147.17	0.573853	0.0656947	8.73515	2.43329e-18	4.61945e-17
ENSMUSG00000038773	Kdm3b	277250	2102.1	-0.517586	0.0592548	-8.73493	2.43804e-18	4.62331e-17
ENSMUSG00000034947	Tmem106a	217203	12748.3	-0.403424	0.046269	-8.7191	2.80414e-18	5.31165e-17
ENSMUSG00000018761	Mpdu1	24070	1836.47	0.525584	0.0603204	8.7132	2.95426e-18	5.5898e-17
ENSMUSG00000030786	Itgam	16409	39042.7	0.380574	0.0436813	8.7125	2.97252e-18	5.61811e-17
ENSMUSG00000022507	1810013L24Rik	69053	2509.09	0.444487	0.0510364	8.70922	3.05979e-18	5.77662e-17
ENSMUSG00000030591	Psmd8	57296	10934	0.291911	0.0335518	8.7003	3.30995e-18	6.24199e-17
ENSMUSG00000026675	Hsd17b7	15490	563.42	1.02054	0.117433	8.69044	3.61034e-18	6.80094e-17
ENSMUSG00000053483	Usp21	30941	1989.63	-0.53927	0.0621157	-8.68171	3.89864e-18	7.33591e-17
ENSMUSG00000034792	Gna15	14676	2254	0.513821	0.059207	8.67839	4.01409e-18	7.5448e-17
ENSMUSG00000030691	Fchsd2	207278	2924	-0.641276	0.0739131	-8.67607	4.09669e-18	7.69156e-17
ENSMUSG00000036046	5031439G07Rik	223739	13360.4	-0.388267	0.0447799	-8.67056	4.29999e-18	8.06437e-17
ENSMUSG00000026110	Mgat4a	269181	7986.66	0.685043	0.0790376	8.6673	4.42482e-18	8.28935e-17
ENSMUSG00000031762	Mt2	17750	347.867	0.889817	0.102845	8.65205	5.05809e-18	9.4653e-17
ENSMUSG00000014158	Trpv4	63873	1733.59	-0.57355	0.0663291	-8.64703	5.28555e-18	9.88009e-17
ENSMUSG00000006589	Aprt	11821	3698.61	0.427303	0.0494228	8.64587	5.3398e-18	9.97056e-17
ENSMUSG00000003500	Impdh1	23917	890.959	0.635729	0.0735361	8.64513	5.3742e-18	1.00238e-16
ENSMUSG00000048164	Gm7204	637273	8722.02	0.510328	0.059055	8.64157	5.54434e-18	1.03298e-16
ENSMUSG00000074743	Thbd	21824	484.722	-1.61884	0.18742	-8.63748	5.74664e-18	1.0695e-16
ENSMUSG00000020914	Top2a	21973	1651.96	-0.53896	0.0624066	-8.63627	5.80796e-18	1.07973e-16
ENSMUSG00000041685	Fcho2	218503	8388.28	-0.387393	0.0448802	-8.6317	6.04465e-18	1.12251e-16
ENSMUSG00000033213	AA467197	433470	111.031	2.15466	0.249735	8.62779	6.25514e-18	1.16034e-16
ENSMUSG00000026914	Psmd14	59029	3389.28	0.395754	0.0458922	8.62354	6.49147e-18	1.20286e-16
ENSMUSG00000043004	Gng2	14702	5188.43	-0.377921	0.0438347	-8.62152	6.60723e-18	1.22298e-16
ENSMUSG00000020900	Myh10	77579	546.269	-1.26018	0.14618	-8.62073	6.65277e-18	1.23008e-16
ENSMUSG00000038683	Pak1ip1	68083	1981.7	0.489736	0.0568251	8.61831	6.79513e-18	1.25504e-16
ENSMUSG00000022463	Srebf2	20788	3328.43	0.481429	0.0559121	8.61046	7.2767e-18	1.34252e-16
ENSMUSG00000063902	Gm7964	666170	4955.75	0.355853	0.0414092	8.59359	8.42965e-18	1.55356e-16
ENSMUSG00000032621	Srek1	218543	1458.2	-0.617555	0.0718863	-8.59072	8.64261e-18	1.59108e-16
ENSMUSG00000022551	Cyc1	66445	4224.08	0.373627	0.0435437	8.58049	9.44696e-18	1.73728e-16
ENSMUSG00000029810	Tmem176b	65963	23367.8	-0.355916	0.0415295	-8.5702	1.03305e-17	1.8977e-16
ENSMUSG00000040466	Blvrb	233016	13203.1	0.354157	0.0413702	8.56068	1.12205e-17	2.05899e-16
ENSMUSG00000025154	Arhgap19	71085	9015.81	-1.06745	0.124735	-8.5577	1.15141e-17	2.11058e-16
ENSMUSG00000019978	Epb41l2	13822	11288.2	0.376462	0.0440061	8.55477	1.181e-17	2.16249e-16
ENSMUSG00000059743	Fdps	110196	1423.95	0.611456	0.0715721	8.54322	1.30534e-17	2.3876e-16
ENSMUSG00000058873	Gm5582	434095	1060.5	0.647596	0.0758305	8.54004	1.34173e-17	2.45154e-16
ENSMUSG00000027671	Actl6a	56456	1555.12	0.47115	0.0551906	8.53678	1.38015e-17	2.51903e-16
ENSMUSG00000038608	Dock10	210293	4478.34	-0.619858	0.0726354	-8.53382	1.41591e-17	2.58153e-16
ENSMUSG00000030056	Isy1	57905	776.384	0.709603	0.0831645	8.53252	1.43188e-17	2.60786e-16
ENSMUSG00000040616	Tmem51	214359	693.623	-0.806084	0.094511	-8.529	1.47623e-17	2.68436e-16
ENSMUSG00000066440	Zfyve26	211978	2803.25	-0.616885	0.0723293	-8.52884	1.47823e-17	2.68436e-16
ENSMUSG00000024048	Myl12a	67268	10549.6	0.336946	0.0395074	8.52869	1.48019e-17	2.68436e-16
ENSMUSG00000004221	Ikbkg	16151	5031.54	0.396781	0.0465225	8.5288	1.4787e-17	2.68436e-16
ENSMUSG00000008892	Vdac3	22335	5733.01	0.318327	0.0373422	8.52459	1.53347e-17	2.77802e-16
ENSMUSG00000028580	Pum1	80912	4112.05	-0.435308	0.0510705	-8.52367	1.54581e-17	2.79741e-16
ENSMUSG00000003746	Man1a	17155	16160.3	-0.3777	0.0443288	-8.5204	1.59002e-17	2.87436e-16
ENSMUSG00000032777	Gtf3c1	233863	3029.44	-0.396956	0.046653	-8.5087	1.75889e-17	3.17625e-16
ENSMUSG00000067787	Blcap	53619	2450.33	0.443563	0.0521316	8.50852	1.76164e-17	3.17786e-16
ENSMUSG00000027765	P2ry1	18441	479.836	-0.976154	0.114851	-8.49933	1.90685e-17	3.43616e-16
ENSMUSG00000031996	Aplp2	11804	37886.2	-0.31967	0.0376236	-8.49653	1.95344e-17	3.5164e-16
ENSMUSG00000052593	Adam17	11491	28070	0.320319	0.0377092	8.49443	1.98899e-17	3.57661e-16
ENSMUSG00000052087	Rgs14	51791	825.581	-0.649983	0.0765768	-8.48798	2.10257e-17	3.77686e-16
ENSMUSG00000074063	Osgin1	71839	1764.46	-0.582436	0.0687562	-8.47104	2.43219e-17	4.36436e-16
ENSMUSG00000028159	Dapp1	26377	1444.18	-0.627401	0.0740727	-8.47008	2.45223e-17	4.39568e-16
ENSMUSG00000092741	Mir3074-1	100526474	87.5683	1.82698	0.215753	8.46793	2.49801e-17	4.47304e-16
ENSMUSG00000024781	Lipa	16889	107356	-0.390926	0.0461724	-8.46666	2.52523e-17	4.51703e-16
ENSMUSG00000027519	Rab22a	19334	3779.66	-0.447051	0.0528121	-8.46493	2.56308e-17	4.57993e-16
ENSMUSG00000052214	Opa3	403187	1786.69	0.544057	0.0642729	8.4648	2.56599e-17	4.58031e-16
ENSMUSG00000029217	Tec	21682	3617.37	-0.547206	0.0646746	-8.4609	2.65311e-17	4.73087e-16
ENSMUSG00000037351	Actr1b	226977	4588.41	0.320078	0.0378315	8.46062	2.65949e-17	4.73728e-16
ENSMUSG00000022270	Retreg1	66270	3762.38	0.471034	0.0557147	8.45439	2.80559e-17	4.9923e-16
ENSMUSG00000037474	Dtl	76843	381.601	1.05225	0.124541	8.44904	2.93715e-17	5.22095e-16
ENSMUSG00000037341	Slc9a7	236727	749.785	-0.680874	0.0805996	-8.44761	2.97338e-17	5.27984e-16
ENSMUSG00000027940	Tpm3	59069	31542.3	0.252065	0.0298396	8.44732	2.98076e-17	5.28744e-16
ENSMUSG00000029730	Mcm7	17220	1534.07	0.508925	0.0602777	8.44301	3.09276e-17	5.4804e-16
ENSMUSG00000001403	Ube2c	68612	452.131	-1.00869	0.119493	-8.44139	3.13587e-17	5.55101e-16
ENSMUSG00000037652	Phc3	241915	1456.82	-0.830224	0.0983711	-8.43971	3.18115e-17	5.62532e-16
ENSMUSG00000040710	St8sia4	20452	6876.36	-0.516286	0.0611887	-8.43761	3.23902e-17	5.7217e-16
ENSMUSG00000018293	Pfn1	18643	29750.4	0.39918	0.0473161	8.43645	3.27128e-17	5.7727e-16
ENSMUSG00000073418	C4b	12268	466.339	0.974565	0.115554	8.43386	3.34454e-17	5.89588e-16
ENSMUSG00000029816	Gpnmb	93695	287483	-0.337125	0.039974	-8.43361	3.35153e-17	5.90209e-16
ENSMUSG00000025027	Xpnpep1	170750	4104.39	0.374287	0.0443966	8.43053	3.44117e-17	6.05368e-16
ENSMUSG00000032594	Ip6k1	27399	5676.31	-0.435609	0.0516731	-8.4301	3.45372e-17	6.06949e-16
ENSMUSG00000029364	Wsb2	59043	8414.21	0.340848	0.040485	8.4191	3.79384e-17	6.66034e-16
ENSMUSG00000073274	Gm14636	100503338	615	2.13876	0.254185	8.4142	3.95576e-17	6.93744e-16
ENSMUSG00000046722	Cdc42se1	57912	7028.68	0.303453	0.0360693	8.41305	3.99498e-17	6.99902e-16
ENSMUSG00000049577	Zfpm1	22761	584.464	0.698159	0.0830052	8.41102	4.06447e-17	7.11345e-16
ENSMUSG00000040102	Klhl42	232539	1237.1	-0.619649	0.0737732	-8.39939	4.48814e-17	7.84687e-16
ENSMUSG00000001891	Ugp2	216558	5414.71	0.298766	0.0355773	8.39766	4.55474e-17	7.95515e-16
ENSMUSG00000032312	Csk	12988	3927.65	-0.407665	0.0485719	-8.39303	4.73788e-17	8.25807e-16
ENSMUSG00000049659	Aftph	216549	4581.78	-0.498707	0.0594418	-8.38985	4.86759e-17	8.47547e-16
ENSMUSG00000010406	Mrpl52	68836	1382.95	0.756973	0.0902731	8.38537	5.05682e-17	8.79597e-16
ENSMUSG00000047126	Cltc	67300	55291	-0.520805	0.0621355	-8.38177	5.21354e-17	9.05933e-16
ENSMUSG00000024952	Rps6ka4	56613	5616.73	0.548307	0.0654308	8.37995	5.29498e-17	9.19146e-16
ENSMUSG00000033382	Trappc8	75964	5942.51	-0.409863	0.0489209	-8.37808	5.37985e-17	9.32928e-16
ENSMUSG00000059883	Irak4	266632	1370.52	-0.478136	0.0570727	-8.37767	5.39878e-17	9.35257e-16
ENSMUSG00000002107	Celf2	14007	6897.14	-0.416944	0.0498248	-8.36819	5.85091e-17	1.01255e-15
ENSMUSG00000050271	Prag1	244418	1284.17	0.630857	0.075395	8.36735	5.89271e-17	1.01875e-15
ENSMUSG00000004707	Ly9	17085	3798.05	-0.393402	0.0470195	-8.36678	5.92152e-17	1.02269e-15
ENSMUSG00000028982	Slc25a33	70556	260.192	1.08363	0.129549	8.36468	6.02806e-17	1.04004e-15
ENSMUSG00000022141	Nipbl	71175	2201.6	-0.601127	0.071893	-8.36142	6.19685e-17	1.06808e-15
ENSMUSG00000044600	Smim7	66818	3120.05	0.382679	0.045779	8.35927	6.31094e-17	1.08664e-15
ENSMUSG00000036867	Smad6	17130	122.887	1.69926	0.203438	8.35274	6.66991e-17	1.14729e-15
ENSMUSG00000066878	Gm10184	100043906	2349.44	0.557194	0.0668546	8.33442	7.78765e-17	1.3382e-15
ENSMUSG00000023008	Fmnl3	22379	7452.35	0.328965	0.0395063	8.32691	8.29823e-17	1.4245e-15
ENSMUSG00000016087	Fli1	14247	5172.47	-0.404406	0.0485702	-8.32622	8.34664e-17	1.43137e-15
ENSMUSG00000022185	Acin1	56215	2044.3	-0.503353	0.0604612	-8.32522	8.41721e-17	1.44202e-15
ENSMUSG00000029447	Cct6a	12466	6864.77	0.375275	0.0450922	8.32238	8.62133e-17	1.4755e-15
ENSMUSG00000078134	Gm12355	100502754	950.401	0.632322	0.0760207	8.31776	8.96402e-17	1.53261e-15
ENSMUSG00000040209	Zfp704	170753	1976.1	-0.683115	0.0821529	-8.31517	9.16188e-17	1.56487e-15
ENSMUSG00000036442	Thap11	59016	1446.34	-0.522076	0.0627915	-8.31443	9.21932e-17	1.5731e-15
ENSMUSG00000060261	Gtf2i	14886	3360.16	-0.477228	0.057511	-8.29804	1.05845e-16	1.80424e-15
ENSMUSG00000021668	Polk	27015	973.474	-0.721586	0.0870174	-8.29244	1.1095e-16	1.88937e-15
ENSMUSG00000045210	Vcpip1	70675	4293.93	-0.497187	0.0601532	-8.26536	1.39278e-16	2.3694e-15
ENSMUSG00000028397	Kdm4c	76804	1550.62	-0.570138	0.0690181	-8.26071	1.44814e-16	2.46112e-15
ENSMUSG00000032423	Syncrip	56403	2714.66	0.400126	0.0484446	8.25945	1.46345e-16	2.48466e-15
ENSMUSG00000023913	Pla2g7	27226	16708.6	0.364869	0.0441806	8.25857	1.47428e-16	2.50054e-15
ENSMUSG00000023015	Racgap1	26934	1444.17	-0.537756	0.065122	-8.25766	1.48552e-16	2.5171e-15
ENSMUSG00000028266	Lmo4	16911	1010.93	0.825247	0.0999996	8.2525	1.55121e-16	2.62579e-15
ENSMUSG00000001833	2021-09-07	235072	8900.43	0.268149	0.0325127	8.24752	1.6172e-16	2.73207e-15
ENSMUSG00000033016	Nfatc1	18018	3995.21	-0.409964	0.0497075	-8.24753	1.61704e-16	2.73207e-15
ENSMUSG00000049502	Dtx3l	209200	4915.35	-0.759458	0.0921326	-8.2431	1.67802e-16	2.83202e-15
ENSMUSG00000024052	Lpin2	64898	6881.65	0.457734	0.0555348	8.24229	1.68947e-16	2.84852e-15
ENSMUSG00000041235	Chd7	320790	1893.98	0.779497	0.0946017	8.23978	1.72533e-16	2.9061e-15
ENSMUSG00000018501	Ncor1	20185	5150.62	-0.40221	0.0488392	-8.23539	1.78966e-16	3.01148e-15
ENSMUSG00000029560	Snx8	231834	5628.04	-0.380472	0.046219	-8.23193	1.84218e-16	3.09679e-15
ENSMUSG00000020074	Ccar1	67500	3635.5	-0.338478	0.0411494	-8.22557	1.94258e-16	3.26235e-15
ENSMUSG00000020611	Gna13	14674	9706.42	0.302031	0.0367282	8.2234	1.97818e-16	3.31886e-15
ENSMUSG00000099021	Rn7s1	103948	8637.56	1.47329	0.179173	8.22268	1.99005e-16	3.3355e-15
ENSMUSG00000025701	Alox5	11689	2064.7	0.550735	0.0669927	8.22083	2.02103e-16	3.38408e-15
ENSMUSG00000099250	Rn7s2	103949	8640.24	1.47226	0.179178	8.21675	2.09099e-16	3.49778e-15
ENSMUSG00000061411	Nol4l	329540	1083.15	-0.651756	0.0794112	-8.20735	2.26116e-16	3.77504e-15
ENSMUSG00000037410	Tbc1d2b	67016	4365.48	-0.514394	0.0626747	-8.20736	2.26096e-16	3.77504e-15
ENSMUSG00000029372	Ppbp	57349	147.595	1.47845	0.180288	8.20051	2.39377e-16	3.9925e-15
ENSMUSG00000080242	Atp6v0c-ps2	100039636	27568.3	0.237847	0.0290725	8.18116	2.81119e-16	4.67955e-15
ENSMUSG00000015340	Cybb	13058	92138.7	0.336288	0.0411288	8.17646	2.92308e-16	4.86104e-15
ENSMUSG00000007850	Hnrnph1	59013	3440.62	0.458199	0.0561019	8.16727	3.15459e-16	5.24093e-15
ENSMUSG00000038371	Sbf2	319934	8889.47	-0.360614	0.0441886	-8.1608	3.32821e-16	5.52399e-15
ENSMUSG00000078122	F630028O10Rik	100038363	703.783	-1.08903	0.133479	-8.15881	3.38345e-16	5.60475e-15
ENSMUSG00000024590	Lmnb1	16906	716.393	1.12677	0.138104	8.15882	3.38315e-16	5.60475e-15
ENSMUSG00000030614	Tmem126b	68472	1425.62	-0.608671	0.074642	-8.15454	3.50505e-16	5.80053e-15
ENSMUSG00000060862	Zbtb40	230848	658.986	-0.904398	0.110968	-8.15007	3.63713e-16	6.01327e-15
ENSMUSG00000013974	Mcemp1	69189	250.519	1.28555	0.15775	8.14928	3.66087e-16	6.04665e-15
ENSMUSG00000058013	2021-09-11	52398	4305.72	0.538806	0.0661331	8.1473	3.72154e-16	6.1409e-15
ENSMUSG00000017002	Slpi	20568	259.103	1.50998	0.185356	8.14638	3.74973e-16	6.18142e-15
ENSMUSG00000023175	Bsg	12215	13071.4	0.314015	0.0385587	8.14381	3.83036e-16	6.30823e-15
ENSMUSG00000044708	Kcnj10	16513	2528.41	-0.47898	0.0588232	-8.1427	3.86546e-16	6.3599e-15
ENSMUSG00000040774	Cept1	99712	5675.7	-0.453348	0.055683	-8.14159	3.90129e-16	6.41265e-15
ENSMUSG00000021411	Pxdc1	66895	853.769	0.847533	0.104141	8.13836	4.00678e-16	6.57969e-15
ENSMUSG00000041515	Irf8	15900	16400.2	-0.305105	0.037505	-8.13504	4.11808e-16	6.75595e-15
ENSMUSG00000022774	Ncbp2	68092	2056.41	-0.407614	0.0501113	-8.13417	4.1476e-16	6.79784e-15
ENSMUSG00000053040	Aph1c	68318	2815.22	-0.718826	0.0884803	-8.12414	4.50563e-16	7.37753e-15
ENSMUSG00000031584	Gsr	14782	15320.9	0.346596	0.0426993	8.11712	4.7736e-16	7.80881e-15
ENSMUSG00000028568	Btf3l4	70533	1977.96	0.414567	0.0511094	8.11137	5.00501e-16	8.1795e-15
ENSMUSG00000024527	Afg3l2	69597	3232.24	0.389027	0.0479754	8.10888	5.10866e-16	8.34088e-15
ENSMUSG00000032939	Nup93	71805	2469.8	0.431995	0.0532856	8.10716	5.18166e-16	8.45196e-15
ENSMUSG00000027358	Bmp2	12156	3972.97	-0.460996	0.0568737	-8.10562	5.24792e-16	8.55184e-15
ENSMUSG00000031712	Il15	16168	815.179	-0.847132	0.104553	-8.1024	5.38836e-16	8.77231e-15
ENSMUSG00000036896	C1qc	12262	96736.6	-0.305926	0.0377798	-8.09761	5.60498e-16	9.11626e-15
ENSMUSG00000030291	Med21	108098	963.2	0.543817	0.067195	8.09313	5.81527e-16	9.44024e-15
ENSMUSG00000007613	Tgfbr1	21812	21913	0.479972	0.059306	8.09314	5.81474e-16	9.44024e-15
ENSMUSG00000071324	Armc2	213402	254.602	-1.21915	0.15066	-8.09208	5.86568e-16	9.51301e-15
ENSMUSG00000006476	Nsmf	56876	943.745	0.748152	0.0924676	8.09096	5.91944e-16	9.59108e-15
ENSMUSG00000040675	Mthfd1l	270685	287.366	1.24653	0.154126	8.0877	6.08008e-16	9.83265e-15
ENSMUSG00000047832	Cdca4	71963	1277.17	0.493196	0.0609807	8.08775	6.07783e-16	9.83265e-15
ENSMUSG00000024927	Rela	19697	8217.69	0.272983	0.0337595	8.08612	6.15971e-16	9.95197e-15
ENSMUSG00000034602	Mon2	67074	1879.99	-0.448765	0.0555153	-8.08362	6.28718e-16	1.01483e-14
ENSMUSG00000038172	Ttc39b	69863	1185.37	0.865121	0.107056	8.08104	6.4216e-16	1.03456e-14
ENSMUSG00000004798	Ulk2	29869	6778.95	-0.375156	0.0464364	-8.07892	6.53433e-16	1.05173e-14
ENSMUSG00000001416	Cct3	12462	7458.45	0.301016	0.0372674	8.07718	6.62803e-16	1.06581e-14
ENSMUSG00000038463	Olfml2b	320078	141.588	1.50697	0.186622	8.07494	6.75096e-16	1.08455e-14
ENSMUSG00000022303	Dcstamp	75766	85.3142	2.12497	0.263409	8.06721	7.19247e-16	1.15439e-14
ENSMUSG00000030275	Etnk1	75320	7856.96	-0.545111	0.0675993	-8.06386	7.39243e-16	1.18536e-14
ENSMUSG00000026605	Cenpf	108000	332.454	-1.35458	0.167994	-8.0633	7.42606e-16	1.18964e-14
ENSMUSG00000033207	Mamdc2	71738	238.9	-1.18479	0.146998	-8.05987	7.63728e-16	1.22232e-14
ENSMUSG00000037685	Atp8a1	11980	5920.44	-0.603255	0.074851	-8.05941	7.66617e-16	1.22579e-14
ENSMUSG00000015950	Ncf1	17969	16348.1	0.347786	0.0431608	8.05792	7.76044e-16	1.23971e-14
ENSMUSG00000009185	Ccl8	20307	620.863	0.733251	0.0911284	8.04635	8.53019e-16	1.36139e-14
ENSMUSG00000032733	Snx33	235406	1102.96	-0.668313	0.0830604	-8.0461	8.54723e-16	1.36283e-14
ENSMUSG00000045374	Wdr81	192652	7297.2	-0.415061	0.0516258	-8.0398	8.99877e-16	1.43349e-14
ENSMUSG00000044206	Vsig4	278180	230.188	-1.11947	0.139244	-8.03962	9.01164e-16	1.4342e-14
ENSMUSG00000003955	Fam162a	70186	1091.01	0.544909	0.0678213	8.03448	9.39773e-16	1.49425e-14
ENSMUSG00000026826	Nr4a2	18227	69.8653	2.74365	0.341614	8.03144	9.63376e-16	1.53035e-14
ENSMUSG00000024696	Lpxn	107321	6446.97	-0.45941	0.0572029	-8.03124	9.64943e-16	1.53141e-14
ENSMUSG00000030870	Ubfd1	28018	3998.49	-0.380033	0.0473284	-8.02969	9.77166e-16	1.54936e-14
ENSMUSG00000029148	Nrbp1	192292	4922.85	0.372125	0.0463596	8.02694	9.99323e-16	1.58302e-14
ENSMUSG00000035629	Rubcn	100502698	3944.72	-0.452407	0.0563745	-8.02502	1.01506e-15	1.60496e-14
ENSMUSG00000036501	Fam13b	225358	2337.47	-0.408302	0.0508782	-8.0251	1.01447e-15	1.60496e-14
ENSMUSG00000048807	Slc35e4	103710	1441.56	0.710303	0.088524	8.02385	1.02485e-15	1.61894e-14
ENSMUSG00000037887	Dusp8	18218	173.72	1.86326	0.232273	8.02182	1.04187e-15	1.64429e-14
ENSMUSG00000038068	Rnf144b	218215	673.684	-1.05077	0.131024	-8.0197	1.06001e-15	1.67138e-14
ENSMUSG00000046962	Zbtb21	114565	1590.95	0.596415	0.0743724	8.0193	1.06351e-15	1.67534e-14
ENSMUSG00000002111	Spi1	20375	15015.6	0.415462	0.0518637	8.01065	1.14104e-15	1.79582e-14
ENSMUSG00000037251	Pomk	74653	2325.02	-0.494988	0.0617991	-8.00964	1.15046e-15	1.80897e-14
ENSMUSG00000062646	Ganc	76051	746.728	-0.756322	0.0944708	-8.00588	1.18613e-15	1.86333e-14
ENSMUSG00000054855	Rnd1	223881	107.294	1.93552	0.241903	8.00123	1.23182e-15	1.93333e-14
ENSMUSG00000066684	Pilrb1	170741	572.291	1.11706	0.139627	8.0003	1.24116e-15	1.9462e-14
ENSMUSG00000001441	Npepps	19155	3808.04	-0.342619	0.0428566	-7.99455	1.30047e-15	2.03733e-14
ENSMUSG00000021024	Psma6	26443	6945.16	0.334929	0.0419366	7.98656	1.38756e-15	2.17176e-14
ENSMUSG00000037669	Ldah	68832	2580.01	-0.409589	0.0513075	-7.98303	1.42781e-15	2.23271e-14
ENSMUSG00000024121	Atp6v0c	11984	49748.7	0.249311	0.0312344	7.98194	1.44046e-15	2.25042e-14
ENSMUSG00000023460	Rab12	19328	3363.73	0.370913	0.0465169	7.97373	1.53951e-15	2.40297e-14
ENSMUSG00000059552	Trp53	22059	2715.2	0.352194	0.0441937	7.96931	1.5956e-15	2.48824e-14
ENSMUSG00000020326	Ccng1	12450	10754.3	-0.401168	0.0503993	-7.95979	1.72327e-15	2.68486e-14
ENSMUSG00000029110	Rnf4	19822	7559.77	0.30535	0.0383724	7.95756	1.75472e-15	2.73136e-14
ENSMUSG00000040681	Hmgn1	15312	4034.63	0.366873	0.0461273	7.95348	1.81342e-15	2.82016e-14
ENSMUSG00000031652	N4bp1	80750	2732.22	0.579919	0.0730449	7.93921	2.03471e-15	3.15853e-14
ENSMUSG00000038412	Higd1a	56295	945.592	0.657046	0.0827589	7.93928	2.03357e-15	3.15853e-14
ENSMUSG00000034354	Mtmr3	74302	8491.64	-0.290097	0.0365521	-7.93652	2.07926e-15	3.22474e-14
ENSMUSG00000052336	Cx3cr1	13051	26423.1	0.335218	0.0422492	7.93432	2.11648e-15	3.27948e-14
ENSMUSG00000020901	Pik3r5	320207	10824.9	0.295698	0.0373164	7.92407	2.29856e-15	3.55838e-14
ENSMUSG00000020361	Hspa4	15525	7734.33	0.390765	0.0493232	7.92254	2.32715e-15	3.59937e-14
ENSMUSG00000029470	P2rx4	18438	28428	-0.232897	0.0294207	-7.91609	2.45094e-15	3.78739e-14
ENSMUSG00000008475	Arpc5	67771	30008.7	0.254017	0.0320915	7.91538	2.46492e-15	3.80555e-14
ENSMUSG00000041219	Arhgap11a	228482	1892.2	-0.600644	0.075934	-7.91008	2.57225e-15	3.96765e-14
ENSMUSG00000014353	Tmem87b	72477	5465.86	0.306132	0.038738	7.90261	2.73113e-15	4.20891e-14
ENSMUSG00000000440	Pparg	19016	439.512	-1.05417	0.133466	-7.89844	2.82412e-15	4.34827e-14
ENSMUSG00000017765	Slc12a4	20498	2979.11	0.437041	0.0553351	7.89808	2.83222e-15	4.35681e-14
ENSMUSG00000030246	Ldhb	16832	1319.12	0.597086	0.0756415	7.89363	2.93522e-15	4.51118e-14
ENSMUSG00000079316	Rab9	56382	1381.16	-0.492583	0.0624569	-7.88678	3.10087e-15	4.76147e-14
ENSMUSG00000020873	Slc35b1	110172	2136.79	0.494635	0.0627271	7.88552	3.13239e-15	4.80553e-14
ENSMUSG00000006215	Zbtb17	22642	1258.55	0.524312	0.0665014	7.88422	3.16507e-15	4.85131e-14
ENSMUSG00000039294	Cybc1	217370	3818.02	-0.391228	0.0496263	-7.88348	3.1839e-15	4.87578e-14
ENSMUSG00000024581	Napg	108123	2745.56	0.331363	0.0420452	7.88111	3.24474e-15	4.96447e-14
ENSMUSG00000050390	C77080	97130	2752.86	-0.538014	0.068335	-7.87319	3.45715e-15	5.28473e-14
ENSMUSG00000009535	Rnmt	67897	1848.35	0.49611	0.0630571	7.86763	3.61426e-15	5.51994e-14
ENSMUSG00000036197	Gxylt1	223827	2490.67	-0.436917	0.0555796	-7.8611	3.80777e-15	5.81026e-14
ENSMUSG00000022094	Slc39a14	213053	1687.78	0.558783	0.071085	7.86078	3.81748e-15	5.81986e-14
ENSMUSG00000000378	Ccm2	216527	2851.21	-0.340785	0.0433595	-7.85951	3.85636e-15	5.87388e-14
ENSMUSG00000039318	Rab3gap2	98732	3435.29	-0.401834	0.0511331	-7.8586	3.88457e-15	5.91156e-14
ENSMUSG00000024143	Rhoq	104215	7114.49	0.355575	0.0452672	7.85504	3.99637e-15	6.07627e-14
ENSMUSG00000043909	Trp53bp1	27223	1813.84	-0.617227	0.0785786	-7.85491	4.0007e-15	6.07743e-14
ENSMUSG00000020629	Adi1	104923	3033.87	-0.376965	0.04804	-7.8469	4.26432e-15	6.47211e-14
ENSMUSG00000007564	Ppp2r1a	51792	12932.5	0.227475	0.029001	7.8437	4.37474e-15	6.63379e-14
ENSMUSG00000060012	Kif13b	16554	3857.85	-0.558176	0.0711643	-7.84348	4.38227e-15	6.6393e-14
ENSMUSG00000031833	Mast3	546071	3308.84	-0.371041	0.0473521	-7.83579	4.65908e-15	7.0524e-14
ENSMUSG00000034729	Mrps10	64657	1101.33	0.538278	0.0687095	7.83412	4.72133e-15	7.14028e-14
ENSMUSG00000060475	Wtap	60532	4258.92	0.377507	0.0481889	7.8339	4.72948e-15	7.14625e-14
ENSMUSG00000021676	Iqgap2	544963	4687.17	-0.462676	0.0590642	-7.83344	4.74701e-15	7.16638e-14
ENSMUSG00000023048	Prr13	66151	7567.21	0.310407	0.0396346	7.83171	4.81278e-15	7.25924e-14
ENSMUSG00000020893	Per1	18626	389.042	0.867127	0.110747	7.82983	4.88527e-15	7.36205e-14
ENSMUSG00000028889	Yrdc	230734	924.738	0.651111	0.0831659	7.82906	4.9152e-15	7.40061e-14
ENSMUSG00000034855	Cxcl10	15945	1149.05	3.28054	0.419655	7.81724	5.39938e-15	8.12244e-14
ENSMUSG00000028121	Bcar3	29815	1871.17	0.502206	0.0642517	7.81623	5.44288e-15	8.18066e-14
ENSMUSG00000042476	Abcb4	18670	1377.68	0.574276	0.0735038	7.81288	5.58963e-15	8.39381e-14
ENSMUSG00000096544	Gm4617	100043740	2070.15	0.583287	0.0746752	7.81099	5.67425e-15	8.51338e-14
ENSMUSG00000005373	Mlxipl	58805	363.01	1.00357	0.128495	7.81019	5.71036e-15	8.56001e-14
ENSMUSG00000079445	B3gnt7	227327	601.945	0.695566	0.0890644	7.8097	5.73263e-15	8.58583e-14
ENSMUSG00000053436	Mapk14	26416	9695.64	-0.325609	0.0416993	-7.80851	5.78702e-15	8.65968e-14
ENSMUSG00000036611	Eepd1	67484	3932.36	0.353003	0.0452623	7.79907	6.23672e-15	9.32441e-14
ENSMUSG00000005732	Ranbp1	19385	3677.96	0.386184	0.0495209	7.7984	6.26956e-15	9.36529e-14
ENSMUSG00000033943	Mga	29808	3003.03	-0.714777	0.0916969	-7.795	6.44086e-15	9.61275e-14
ENSMUSG00000026012	Cd28	12487	4473.16	-1.01117	0.129725	-7.79476	6.45312e-15	9.62261e-14
ENSMUSG00000064120	Mocs1	56738	1088.88	0.668198	0.0857415	7.79318	6.53447e-15	9.73539e-14
ENSMUSG00000019814	Ltv1	353258	1375.51	0.515637	0.0661954	7.78961	6.72147e-15	1.00052e-13
ENSMUSG00000027087	Itgav	16410	18505.2	0.366501	0.0470604	7.78788	6.8143e-15	1.01346e-13
ENSMUSG00000070284	Gmppb	331026	741.371	0.708934	0.0910643	7.78498	6.97237e-15	1.03606e-13
ENSMUSG00000021938	Pspc1	66645	1149.15	0.533201	0.0685129	7.7825	7.11067e-15	1.05569e-13
ENSMUSG00000040613	Apobec1	11810	20030	-0.287549	0.0369803	-7.77573	7.50147e-15	1.11274e-13
ENSMUSG00000034647	Ankrd12	106585	1376.91	-0.651087	0.08376	-7.77324	7.65014e-15	1.13381e-13
ENSMUSG00000078652	Psme3	19192	5023.44	0.310241	0.0399132	7.77288	7.672e-15	1.13606e-13
ENSMUSG00000034593	Myo5a	17918	20609.5	-0.391122	0.0503444	-7.76893	7.91504e-15	1.17103e-13
ENSMUSG00000020522	Mfap3	216760	3712.93	-0.370813	0.0477435	-7.76677	8.05115e-15	1.19013e-13
ENSMUSG00000034641	Cd300ld	217305	3132.13	0.450061	0.0579489	7.76652	8.06728e-15	1.19148e-13
ENSMUSG00000027405	Nop56	67134	2303.97	0.487301	0.0627477	7.76604	8.09773e-15	1.19494e-13
ENSMUSG00000021131	Erh	13877	3212.24	0.350079	0.0450821	7.76537	8.14096e-15	1.20028e-13
ENSMUSG00000006235	Epor	13857	508.684	-0.747188	0.0962504	-7.76296	8.29693e-15	1.22222e-13
ENSMUSG00000017697	Ada	11486	1001.92	-0.627366	0.0808348	-7.76109	8.42043e-15	1.23934e-13
ENSMUSG00000028161	Ppp3ca	19055	5099.31	-0.314626	0.0405623	-7.75661	8.72295e-15	1.28276e-13
ENSMUSG00000018909	Arrb1	109689	4508.25	-0.409207	0.0527586	-7.75622	8.75003e-15	1.28563e-13
ENSMUSG00000041229	Phf8	320595	1586.1	-0.514526	0.0663394	-7.75596	8.76771e-15	1.28711e-13
ENSMUSG00000028789	Azin2	242669	255.735	1.0506	0.13551	7.75291	8.98078e-15	1.31726e-13
ENSMUSG00000026581	Sell	20343	217.585	-1.82073	0.234865	-7.75226	9.02733e-15	1.32295e-13
ENSMUSG00000029371	Cxcl5	20311	43.9876	6.06122	0.781881	7.7521	9.03828e-15	1.32341e-13
ENSMUSG00000009741	Ubp1	22221	2376.32	0.497117	0.0641899	7.74447	9.5981e-15	1.40418e-13
ENSMUSG00000003948	Mmd	67468	2103.19	0.51843	0.0669817	7.73988	9.9514e-15	1.45461e-13
ENSMUSG00000031967	Afg3l1	114896	3735.82	0.336833	0.0435609	7.73246	1.05492e-14	1.54067e-13
ENSMUSG00000030795	Fus	233908	2381.91	0.8425	0.108965	7.73187	1.05976e-14	1.54641e-13
ENSMUSG00000049775	Tmsb4x	19241	182999	0.372702	0.0482379	7.72633	1.10694e-14	1.61388e-13
ENSMUSG00000014763	Fam120b	67544	2181.47	-0.415994	0.0538435	-7.72598	1.10998e-14	1.61692e-13
ENSMUSG00000014554	Dguok	27369	1274.68	-0.464012	0.0600603	-7.72576	1.11188e-14	1.61831e-13
ENSMUSG00000022668	Gtpbp8	66067	1295.26	-0.524476	0.0679018	-7.72404	1.12697e-14	1.63888e-13
ENSMUSG00000031422	Morf4l2	56397	9284.85	0.35875	0.0464619	7.72138	1.1508e-14	1.6721e-13
ENSMUSG00000053559	Smagp	207818	1474.01	-0.501826	0.0649951	-7.72098	1.15435e-14	1.67582e-13
ENSMUSG00000030530	Furin	18550	6394.55	0.438376	0.0568069	7.71695	1.19144e-14	1.7282e-13
ENSMUSG00000055681	Cope	59042	5968.93	0.266554	0.0345592	7.71298	1.22911e-14	1.78132e-13
ENSMUSG00000042444	Mindy2	235461	4109.29	-0.412034	0.0534596	-7.7074	1.28411e-14	1.85787e-13
ENSMUSG00000034932	Mrpl54	66047	951.507	0.566107	0.0734498	7.7074	1.28403e-14	1.85787e-13
ENSMUSG00000027309	4930402H24Rik	228602	2445.45	-0.453583	0.0588554	-7.70673	1.29086e-14	1.86605e-13
ENSMUSG00000005397	Nid1	18073	167.663	-1.83547	0.238186	-7.70603	1.29795e-14	1.8747e-13
ENSMUSG00000030469	Zfp719	210105	663.982	0.901422	0.117031	7.70242	1.33509e-14	1.92672e-13
ENSMUSG00000002997	Prkar2b	19088	1518.58	0.645442	0.0838094	7.7013	1.34684e-14	1.94202e-13
ENSMUSG00000098009	Gm5597	434200	469.694	0.775935	0.100789	7.69862	1.37541e-14	1.98154e-13
ENSMUSG00000018398	2021-09-08	20362	7857.38	-0.290391	0.0377393	-7.69466	1.41867e-14	2.04214e-13
ENSMUSG00000059005	Hnrnpa3	229279	3013.01	0.386096	0.0501837	7.69366	1.42987e-14	2.05653e-13
ENSMUSG00000022353	Mtss1	211401	3464.04	-0.415233	0.054029	-7.68537	1.52561e-14	2.19237e-13
ENSMUSG00000022884	Eif4a2	13682	3879.72	-0.386299	0.0502792	-7.68308	1.5531e-14	2.22999e-13
ENSMUSG00000036533	Cdc42ep3	260409	361.345	-1.00157	0.130377	-7.6821	1.56504e-14	2.24524e-13
ENSMUSG00000045658	Pid1	98496	10831.8	0.227931	0.0296775	7.68024	1.5879e-14	2.27612e-13
ENSMUSG00000029192	Tbc1d14	100855	4495.42	-0.335631	0.0437021	-7.67997	1.59121e-14	2.27895e-13
ENSMUSG00000068479	Mfap1a	67532	4564.14	-0.383521	0.0499513	-7.67789	1.61725e-14	2.3143e-13
ENSMUSG00000031765	Mt1	17748	5650.25	0.332579	0.0433394	7.67383	1.6694e-14	2.38691e-13
ENSMUSG00000020594	Pum2	80913	2251.54	-0.442323	0.0576424	-7.67356	1.67286e-14	2.38986e-13
ENSMUSG00000017929	B4galt5	56336	3220.42	0.394893	0.0514801	7.67078	1.70948e-14	2.44012e-13
ENSMUSG00000026749	Nek6	59126	9202.31	0.393949	0.0514103	7.66284	1.81869e-14	2.59384e-13
ENSMUSG00000062421	Arf2	11841	3249.73	0.374116	0.0488278	7.66194	1.83141e-14	2.6098e-13
ENSMUSG00000027361	Gabpb1	14391	1080	0.52355	0.0683414	7.66081	1.8477e-14	2.63081e-13
ENSMUSG00000048249	Crebrf	77128	2753.7	-0.648207	0.0846384	-7.65854	1.88065e-14	2.67548e-13
ENSMUSG00000007817	Zmiz1	328365	8741.85	-0.356874	0.0465997	-7.6583	1.88405e-14	2.67808e-13
ENSMUSG00000037418	Best1	24115	112.458	1.71448	0.223885	7.65783	1.89096e-14	2.68567e-13
ENSMUSG00000020790	Ankfy1	11736	11593.9	-0.388383	0.0507426	-7.65398	1.94854e-14	2.76514e-13
ENSMUSG00000027852	Nras	18176	7931.92	0.26184	0.0342126	7.65331	1.95878e-14	2.77736e-13
ENSMUSG00000072594	Gm16439	100042570	368.559	0.925539	0.121008	7.64856	2.03246e-14	2.87943e-13
ENSMUSG00000070348	Ccnd1	12443	1447.35	0.638016	0.0834294	7.64737	2.05132e-14	2.90374e-13
ENSMUSG00000038910	Plcl2	224860	2702.57	-0.38998	0.0509973	-7.64707	2.05608e-14	2.90805e-13
ENSMUSG00000003528	Slc25a1	13358	3328.43	0.320883	0.0419817	7.64342	2.11529e-14	2.98932e-13
ENSMUSG00000047648	Fbxo30	71865	2264.66	0.647204	0.0847311	7.63832	2.20075e-14	3.10752e-13
ENSMUSG00000019302	Atp6v0a1	11975	17714.3	-0.247921	0.0324762	-7.63393	2.27704e-14	3.21257e-13
ENSMUSG00000020919	Stat5b	20851	3317.66	-0.370782	0.0486467	-7.62194	2.49896e-14	3.52274e-13
ENSMUSG00000029060	Mib2	76580	2667.82	-0.510082	0.0669698	-7.61659	2.60457e-14	3.66859e-13
ENSMUSG00000066245	Gm10156	626661	303.244	1.23774	0.162605	7.6119	2.70104e-14	3.80132e-13
ENSMUSG00000006585	Cdt1	67177	996.009	0.601591	0.0790544	7.60984	2.74435e-14	3.85909e-13
ENSMUSG00000021054	Sgpp1	81535	5116.04	-0.361035	0.0474608	-7.60701	2.80504e-14	3.94118e-13
ENSMUSG00000025959	Klf7	93691	661.771	1.00354	0.132085	7.59765	3.01551e-14	4.2334e-13
ENSMUSG00000045551	Fpr1	14293	5831.99	0.582637	0.0767072	7.5956	3.06378e-14	4.29762e-13
ENSMUSG00000020349	Ppp2ca	19052	10808.7	0.283589	0.0373394	7.5949	3.08025e-14	4.31717e-13
ENSMUSG00000016477	E2f3	13557	796.018	0.665281	0.0876541	7.58985	3.20279e-14	4.48522e-13
ENSMUSG00000025791	Pgm2	72157	2411.66	0.389722	0.0513785	7.58532	3.31677e-14	4.64102e-13
ENSMUSG00000032580	Rbm5	83486	4887.1	-0.435367	0.0574204	-7.58208	3.40047e-14	4.75424e-13
ENSMUSG00000029050	Ski	20481	12399.8	0.357583	0.0471713	7.58053	3.44151e-14	4.80767e-13
ENSMUSG00000071708	Sms	20603	1692.59	0.44423	0.0586497	7.57429	3.61092e-14	5.04019e-13
ENSMUSG00000024856	Cdk2ap2	52004	1979.88	-0.437651	0.0577904	-7.57307	3.64502e-14	5.08362e-13
ENSMUSG00000069083	Gm10259	100039592	2121.2	0.555954	0.0734784	7.56622	3.84237e-14	5.35448e-13
ENSMUSG00000021824	Ap3m1	55946	4373.52	0.343202	0.0453687	7.56472	3.88689e-14	5.41209e-13
ENSMUSG00000070462	Tlnrd1	80889	2114.37	0.756466	0.100125	7.55523	4.18111e-14	5.81701e-13
ENSMUSG00000027018	Hat1	107435	2091.01	0.398512	0.0527517	7.55449	4.20499e-14	5.84545e-13
ENSMUSG00000037935	Smarce1	57376	2700.47	0.376063	0.0497865	7.55352	4.23657e-14	5.88455e-13
ENSMUSG00000069744	Psmb3	26446	3934.55	0.337171	0.0446433	7.55256	4.26772e-14	5.92299e-13
ENSMUSG00000020876	Snx11	74479	1387.4	0.496428	0.0658166	7.5426	4.60702e-14	6.38868e-13
ENSMUSG00000104126	Gm37486	105244017	152.761	1.27718	0.169345	7.54187	4.63295e-14	6.41941e-13
ENSMUSG00000027472	Pdrg1	68559	1922.24	-0.441487	0.0585398	-7.54166	4.64043e-14	6.42455e-13
ENSMUSG00000001700	Gramd3	107022	699.001	0.59676	0.0791306	7.54146	4.64747e-14	6.42907e-13
ENSMUSG00000029467	Atp2a2	11938	13791.7	0.255242	0.0338532	7.53966	4.71199e-14	6.51303e-13
ENSMUSG00000038587	Akap12	83397	245.018	-1.45881	0.19353	-7.53791	4.77557e-14	6.59555e-13
ENSMUSG00000029198	Grpel1	17713	2675.36	0.330071	0.0437964	7.53649	4.82793e-14	6.66247e-13
ENSMUSG00000035329	Fbxo33	70611	2689.21	0.414062	0.0549486	7.53543	4.8671e-14	6.71108e-13
ENSMUSG00000089991	Gm16332	100417200	2036.13	-0.512761	0.0681428	-7.52479	5.28044e-14	7.27514e-13
ENSMUSG00000060038	Dhps	330817	1068.26	0.505398	0.067207	7.52001	5.477e-14	7.53984e-13
ENSMUSG00000075284	Wipf1	215280	4266.67	-0.328858	0.0437361	-7.51915	5.51332e-14	7.58371e-13
ENSMUSG00000016496	Cd274	60533	3450.5	0.804005	0.106941	7.5182	5.55345e-14	7.63274e-13
ENSMUSG00000001270	Ckb	12709	7970.37	-0.284008	0.0377798	-7.51746	5.58485e-14	7.66971e-13
ENSMUSG00000025195	Dnmbp	71972	825.563	-0.739498	0.0984207	-7.51365	5.75023e-14	7.89046e-13
ENSMUSG00000014418	Hps5	246694	3115.72	-0.36848	0.0490468	-7.51284	5.78591e-14	7.93303e-13
ENSMUSG00000037416	Dmxl1	240283	3208.08	-0.687157	0.0914715	-7.51226	5.8115e-14	7.96171e-13
ENSMUSG00000004936	Map2k1	26395	8836.89	0.385706	0.0513487	7.51149	5.84576e-14	8.00221e-13
ENSMUSG00000005803	Sqor	59010	5555.24	0.282639	0.037639	7.50919	5.94945e-14	8.1376e-13
ENSMUSG00000032279	Idh3a	67834	2180.55	0.475286	0.0634137	7.495	6.6297e-14	9.06077e-13
ENSMUSG00000023027	Atf1	11908	1884.25	0.431136	0.0575632	7.48978	6.89871e-14	9.42086e-13
ENSMUSG00000024053	Emilin2	246707	7463.76	0.294213	0.0392948	7.48733	7.02912e-14	9.59126e-13
ENSMUSG00000059119	Nap1l4	17955	4554.15	0.319311	0.0426665	7.48388	7.21592e-14	9.83826e-13
ENSMUSG00000001249	Hpn	15451	504.808	1.03651	0.138517	7.48294	7.26797e-14	9.9013e-13
ENSMUSG00000015714	Cers2	76893	13384.1	0.215769	0.0288405	7.48146	7.34993e-14	1.00049e-12
ENSMUSG00000050549	Fam241a	70617	909.689	0.641785	0.0858197	7.4783	7.52891e-14	1.02404e-12
ENSMUSG00000035049	Rrp12	107094	686.891	0.703896	0.0941653	7.47511	7.71395e-14	1.04837e-12
ENSMUSG00000002984	Tomm40	53333	1556.46	0.529941	0.0709058	7.47388	7.78635e-14	1.05737e-12
ENSMUSG00000037553	Zdhhc18	503610	3539.37	0.376006	0.0503625	7.46598	8.2684e-14	1.12193e-12
ENSMUSG00000043885	Slc36a4	234967	5735.2	0.46569	0.0624821	7.45318	9.11189e-14	1.2354e-12
ENSMUSG00000093930	Hmgcs1	208715	3330.86	0.429865	0.0576793	7.45268	9.14651e-14	1.23911e-12
ENSMUSG00000070691	Runx3	12399	341.834	0.816875	0.109612	7.45245	9.16235e-14	1.24027e-12
ENSMUSG00000028228	Cpne3	70568	8392.31	-0.296321	0.0397752	-7.4499	9.34139e-14	1.2635e-12
ENSMUSG00000004789	Dlst	78920	3967.26	0.404329	0.0542814	7.44877	9.42171e-14	1.27335e-12
ENSMUSG00000022957	Itsn1	16443	6593.51	-0.440246	0.0591888	-7.43799	1.0223e-13	1.38056e-12
ENSMUSG00000032724	Abtb2	99382	185.41	1.71695	0.23085	7.43752	1.02593e-13	1.38435e-12
ENSMUSG00000017670	Elmo2	140579	4700.82	-0.349624	0.0470174	-7.43606	1.03735e-13	1.39865e-12
ENSMUSG00000041132	N4bp2l1	100637	1289.82	-0.537438	0.0723747	-7.42577	1.12125e-13	1.51058e-12
ENSMUSG00000072812	Ahnak2	100041194	707.579	-0.919158	0.123809	-7.42402	1.13614e-13	1.52944e-12
ENSMUSG00000004296	Il12b	16160	47.1998	9.00089	1.21319	7.41918	1.17847e-13	1.58516e-12
ENSMUSG00000025934	Gsta3	14859	143.866	1.89459	0.255476	7.41591	1.20789e-13	1.62346e-12
ENSMUSG00000058704	Memo1	76890	1502.52	0.451603	0.0609148	7.41367	1.22849e-13	1.64984e-12
ENSMUSG00000090112	Shprh	268281	1994.58	-0.532286	0.0718288	-7.41049	1.25836e-13	1.68862e-12
ENSMUSG00000031570	Plpp5	71910	737.42	0.641192	0.0865441	7.40886	1.27394e-13	1.70818e-12
ENSMUSG00000025871	4833439L19Rik	97820	5889.16	0.335365	0.0452827	7.40601	1.30151e-13	1.74378e-12
ENSMUSG00000049090	Zadh2	225791	1493.77	0.569452	0.0768947	7.40561	1.3055e-13	1.74775e-12
ENSMUSG00000037275	Gemin5	216766	1054.17	-0.562241	0.075959	-7.40189	1.34256e-13	1.79595e-12
ENSMUSG00000064061	Dzip3	224170	883.239	-0.638235	0.0862625	-7.39875	1.37471e-13	1.83751e-12
ENSMUSG00000021273	Fdft1	14137	603.924	0.804144	0.108694	7.39824	1.38005e-13	1.84321e-12
ENSMUSG00000048696	Mex3d	237400	658.826	0.625664	0.0845975	7.39577	1.40595e-13	1.87486e-12
ENSMUSG00000021610	Clptm1l	218335	9977.11	0.255094	0.0344915	7.39586	1.40494e-13	1.87486e-12
ENSMUSG00000021069	Pygl	110095	4656.81	0.288835	0.0390603	7.3946	1.41839e-13	1.88996e-12
ENSMUSG00000028771	Ptpn12	19248	2008.87	0.508193	0.068747	7.39222	1.44395e-13	1.92252e-12
ENSMUSG00000038056	Kmt2c	231051	2282.45	-0.822685	0.111307	-7.39117	1.45547e-13	1.93634e-12
ENSMUSG00000034807	Colgalt1	234407	11058.9	0.244717	0.0331148	7.38995	1.46883e-13	1.9526e-12
ENSMUSG00000002992	Apoc2	11813	2665.37	-0.462082	0.062549	-7.38751	1.49602e-13	1.98718e-12
ENSMUSG00000056529	Ptafr	19204	6949.16	0.463407	0.0627452	7.38554	1.51837e-13	2.0153e-12
ENSMUSG00000031352	Hccs	15159	1507.88	0.602312	0.0816143	7.37998	1.58318e-13	2.09969e-12
ENSMUSG00000032501	Trib1	211770	997.435	0.76424	0.103574	7.3787	1.59841e-13	2.11824e-12
ENSMUSG00000024187	Fam234a	106581	13593.7	-0.346413	0.04695	-7.37834	1.6028e-13	2.1224e-12
ENSMUSG00000024360	Etf1	225363	5169.93	0.485902	0.0658612	7.37766	1.61091e-13	2.13148e-12
ENSMUSG00000037376	Trmt6	66926	1047.47	0.564525	0.0765715	7.37253	1.67424e-13	2.21356e-12
ENSMUSG00000060795	Gm13363	433406	952.442	0.678901	0.0920923	7.37196	1.68131e-13	2.22119e-12
ENSMUSG00000097715	Gpr137b-ps	664862	12282.3	0.3014	0.0409127	7.3669	1.74642e-13	2.30541e-12
ENSMUSG00000055184	Fam72a	108900	109.464	1.56351	0.212282	7.36524	1.76826e-13	2.33243e-12
ENSMUSG00000020472	Zkscan17	268417	1248.11	0.478861	0.0650297	7.36372	1.7885e-13	2.35731e-12
ENSMUSG00000042055	Wdr11	207425	4690.13	-0.325392	0.0441911	-7.36329	1.79435e-13	2.36319e-12
ENSMUSG00000060063	Alox5ap	11690	5460.13	0.343086	0.0466023	7.36199	1.81184e-13	2.38438e-12
ENSMUSG00000075706	Gpx4	625249	13514.3	0.406633	0.0552644	7.35795	1.86757e-13	2.45582e-12
ENSMUSG00000030223	Ptpro	19277	4413.63	-0.385347	0.0524001	-7.35394	1.92444e-13	2.52865e-12
ENSMUSG00000026317	Cln8	26889	9152.64	-0.325964	0.0443304	-7.35305	1.9373e-13	2.54359e-12
ENSMUSG00000040479	Dgkz	104418	12207.5	0.229142	0.031164	7.35278	1.94127e-13	2.54654e-12
ENSMUSG00000025465	Echs1	93747	3793.8	0.423424	0.0575878	7.35267	1.94293e-13	2.54654e-12
ENSMUSG00000043991	Pura	19290	1536.62	-0.486597	0.0661804	-7.35259	1.94403e-13	2.54654e-12
ENSMUSG00000035314	Gdpd5	233552	2214.36	0.523592	0.0712146	7.35231	1.94811e-13	2.54991e-12
ENSMUSG00000034709	Ppp1r21	73825	3042.81	-0.419319	0.0570342	-7.35206	1.95173e-13	2.55269e-12
ENSMUSG00000059326	Csf2ra	12982	5055.98	0.581516	0.079124	7.34943	1.99058e-13	2.6015e-12
ENSMUSG00000055413	H2-Q5	15016	169.312	1.35697	0.184812	7.3424	2.09797e-13	2.73975e-12
ENSMUSG00000063354	Slc39a4	72027	465.885	1.01396	0.13834	7.32944	2.31122e-13	3.01592e-12
ENSMUSG00000035623	Rsf1	233532	990.799	-0.575566	0.0785353	-7.32875	2.32303e-13	3.02902e-12
ENSMUSG00000036553	Sh3tc1	231147	1966.68	0.407249	0.0555989	7.32476	2.39318e-13	3.1181e-12
ENSMUSG00000071072	Ptges3	56351	5262.43	0.289668	0.0395536	7.32344	2.41696e-13	3.14667e-12
ENSMUSG00000076431	Sox4	20677	1415.82	0.774369	0.105949	7.30889	2.69363e-13	3.50418e-12
ENSMUSG00000041355	Ssr2	66256	3121.76	0.346327	0.0473894	7.30811	2.70932e-13	3.52191e-12
ENSMUSG00000078153	Psme2b	621823	1332.7	-0.566567	0.0775836	-7.30267	2.82117e-13	3.66451e-12
ENSMUSG00000021775	Nr1d2	353187	3064.35	0.471351	0.0645525	7.30183	2.83887e-13	3.68469e-12
ENSMUSG00000041920	Slc16a6	104681	879.929	0.773097	0.105889	7.30101	2.85605e-13	3.70417e-12
ENSMUSG00000023286	Ube2j2	140499	2171.44	0.415027	0.056859	7.29923	2.89412e-13	3.75068e-12
ENSMUSG00000021190	Lgmn	19141	57546.2	-0.252822	0.0346503	-7.29639	2.95591e-13	3.82785e-12
ENSMUSG00000021003	Galc	14420	12465.9	-0.302107	0.0414143	-7.29475	2.99209e-13	3.87176e-12
ENSMUSG00000041417	Pik3r1	18708	2354.05	-0.588742	0.0807545	-7.29053	3.08747e-13	3.99215e-12
ENSMUSG00000039458	Mtmr12	268783	2678.75	0.337832	0.0463729	7.2851	3.2143e-13	4.15298e-12
ENSMUSG00000021504	B4galt7	218271	2927.6	0.426087	0.0585068	7.2827	3.27215e-13	4.22452e-12
ENSMUSG00000056220	Pla2g4a	18783	2475.7	0.419065	0.0575595	7.28055	3.32464e-13	4.28903e-12
ENSMUSG00000019464	Ptger1	19216	2633.23	-0.366617	0.0503881	-7.27586	3.4422e-13	4.43733e-12
ENSMUSG00000025130	P4hb	18453	36852.2	0.249378	0.0343009	7.27029	3.58721e-13	4.62077e-12
ENSMUSG00000031375	Bgn	12111	159.056	-1.70698	0.234907	-7.26663	3.68565e-13	4.74398e-12
ENSMUSG00000042744	Hectd4	269700	1182.72	-0.988613	0.136073	-7.2653	3.72204e-13	4.78721e-12
ENSMUSG00000029434	Vps33a	77573	7580.77	-0.346658	0.0477213	-7.26422	3.75189e-13	4.82196e-12
ENSMUSG00000040560	Wdr7	104082	5987.33	-0.488514	0.0672573	-7.26336	3.77592e-13	4.84918e-12
ENSMUSG00000016940	Kctd2	70382	1274.29	-0.456708	0.0628943	-7.26152	3.82778e-13	4.91208e-12
ENSMUSG00000024542	Cep192	70799	2388.91	-0.550553	0.0758213	-7.26118	3.83718e-13	4.92043e-12
ENSMUSG00000031153	Gripap1	54645	3092.24	0.358548	0.0493857	7.26017	3.86617e-13	4.95387e-12
ENSMUSG00000046805	Mpeg1	17476	93986.4	-0.258116	0.0355616	-7.25828	3.92055e-13	5.01978e-12
ENSMUSG00000048058	Ldlrad3	241576	3233.34	0.499877	0.0688742	7.25783	3.93337e-13	5.03241e-12
ENSMUSG00000048578	Mlec	109154	12490.4	-0.354731	0.0488776	-7.25754	3.94196e-13	5.03583e-12
ENSMUSG00000038963	Slco4a1	108115	100.466	1.90075	0.261898	7.2576	3.94029e-13	5.03583e-12
ENSMUSG00000045411	2410002F23Rik	668661	796.138	0.590523	0.0813684	7.2574	3.94611e-13	5.03735e-12
ENSMUSG00000046982	Tshz1	110796	1166.67	0.512059	0.0705762	7.2554	4.00479e-13	5.10844e-12
ENSMUSG00000039671	Zmynd8	228880	2727.29	-0.346815	0.0478318	-7.25073	4.14527e-13	5.27971e-12
ENSMUSG00000027900	Dram2	67171	8150.41	-0.273677	0.0377443	-7.25081	4.14283e-13	5.27971e-12
ENSMUSG00000059479	B3gnt8	232984	1277.17	-0.465676	0.0642309	-7.25003	4.16694e-13	5.30335e-12
ENSMUSG00000031378	Abcd1	11666	4860.95	-0.309891	0.0427461	-7.24958	4.18078e-13	5.31699e-12
ENSMUSG00000048222	Mfap1b	100034361	4310.76	-0.351967	0.0485644	-7.24744	4.24735e-13	5.39763e-12
ENSMUSG00000021669	Col4a3bp	68018	1083.12	-0.555319	0.0766754	-7.24247	4.40593e-13	5.59497e-12
ENSMUSG00000040327	Cul9	78309	1820.16	-0.516603	0.0713542	-7.23998	4.48754e-13	5.69435e-12
ENSMUSG00000017679	Ttpal	76080	2083.11	0.502514	0.0694826	7.23222	4.75152e-13	6.02485e-12
ENSMUSG00000002319	Ipo4	75751	2455.96	0.439029	0.0607316	7.22902	4.865e-13	6.16414e-12
ENSMUSG00000038235	F11r	16456	885.994	0.556312	0.076984	7.22633	4.96237e-13	6.28284e-12
ENSMUSG00000019920	Lims1	110829	6334.61	0.342108	0.0473497	7.22514	5.00569e-13	6.33298e-12
ENSMUSG00000019179	Mdh2	17448	7500.59	0.289142	0.0400265	7.22377	5.05662e-13	6.39267e-12
ENSMUSG00000006728	Cdk4	12567	5976.42	0.329156	0.0455776	7.22188	5.12726e-13	6.47716e-12
ENSMUSG00000031093	Dock11	75974	5161.56	-0.448515	0.0621155	-7.22067	5.17331e-13	6.53049e-12
ENSMUSG00000094242	Gm5456	432817	443.023	0.76089	0.105384	7.22019	5.19131e-13	6.54836e-12
ENSMUSG00000027217	Tspan18	241556	759.313	-0.866632	0.120047	-7.21912	5.23259e-13	6.59555e-12
ENSMUSG00000015568	Lpl	16956	88395.9	-0.261813	0.0362704	-7.21836	5.26187e-13	6.62754e-12
ENSMUSG00000046329	Slc25a23	66972	600.738	-0.615715	0.0853003	-7.2182	5.2679e-13	6.63023e-12
ENSMUSG00000005225	Plekha8	231999	1297.04	0.545568	0.0756869	7.20822	5.66882e-13	7.12957e-12
ENSMUSG00000031701	Dnaja2	56445	6205.27	0.300113	0.0416377	7.20772	5.68953e-13	7.15034e-12
ENSMUSG00000026827	Gpd2	14571	1910.84	0.632438	0.0877642	7.20611	5.75722e-13	7.23007e-12
ENSMUSG00000047347	Tdg-ps	545124	522.656	0.713146	0.0990368	7.20082	5.98503e-13	7.51062e-12
ENSMUSG00000024483	Ankhd1	108857	3466.62	-0.51801	0.0719482	-7.19977	6.0313e-13	7.56311e-12
ENSMUSG00000034640	Tiparp	99929	2306.37	0.391226	0.0543422	7.19931	6.05197e-13	7.58344e-12
ENSMUSG00000042726	Trafd1	231712	6708.28	-0.479788	0.0666562	-7.19795	6.11246e-13	7.65361e-12
ENSMUSG00000020437	Myo1g	246177	3126.67	-0.340589	0.0473182	-7.19783	6.11766e-13	7.65449e-12
ENSMUSG00000034681	Rnps1	19826	2896.81	0.313371	0.0435572	7.19448	6.27003e-13	7.83938e-12
ENSMUSG00000030788	Rnf141	67150	6527.56	-0.274808	0.0382161	-7.19091	6.43628e-13	8.04134e-12
ENSMUSG00000059498	Fcgr3	14131	36880.2	-0.260558	0.0362709	-7.18368	6.78609e-13	8.47217e-12
ENSMUSG00000019763	Rmnd1	66084	942.859	-0.646537	0.0902217	-7.1661	7.71658e-13	9.61974e-12
ENSMUSG00000073131	Vma21	67048	2679.7	0.356122	0.0496983	7.16568	7.7401e-13	9.64201e-12
ENSMUSG00000005103	Wdr1	22388	29795	0.278019	0.0388411	7.15786	8.19477e-13	1.02009e-11
ENSMUSG00000032232	Cgnl1	68178	349.054	0.890188	0.124413	7.15513	8.35962e-13	1.03985e-11
ENSMUSG00000053398	Phgdh	236539	852.12	0.622969	0.0871022	7.15217	8.54179e-13	1.06174e-11
ENSMUSG00000021939	Ctsb	13030	842822	-0.232522	0.0325144	-7.15133	8.59388e-13	1.06743e-11
ENSMUSG00000030966	Trim21	20821	1721.12	-0.555419	0.0776858	-7.14956	8.70577e-13	1.08054e-11
ENSMUSG00000027200	Sema6d	214968	284.947	-0.843503	0.117986	-7.14918	8.72975e-13	1.08273e-11
ENSMUSG00000035105	Egln3	112407	492.929	0.783969	0.109667	7.14862	8.76555e-13	1.08638e-11
ENSMUSG00000014039	Prdm15	114604	576.762	-0.655359	0.0917088	-7.14609	8.92837e-13	1.10575e-11
ENSMUSG00000014402	Tsg101	22088	4409.15	0.252274	0.0353042	7.14573	8.95169e-13	1.10784e-11
ENSMUSG00000012296	Tjap1	74094	688.446	0.652544	0.0913586	7.14266	9.15421e-13	1.13208e-11
ENSMUSG00000021843	Ktn1	16709	1615.35	0.541534	0.0758887	7.13589	9.61599e-13	1.18832e-11
ENSMUSG00000030867	Plk1	18817	463.626	-0.875698	0.12279	-7.13167	9.9158e-13	1.22448e-11
ENSMUSG00000020102	Slc16a7	20503	1133.44	-0.58613	0.082216	-7.12914	1.00995e-12	1.24627e-11
ENSMUSG00000061897	Gm14292	100043168	867.141	0.487566	0.0684064	7.12749	1.02219e-12	1.26045e-11
ENSMUSG00000020649	Rrm2	20135	771.511	0.749758	0.105231	7.12485	1.04191e-12	1.28384e-11
ENSMUSG00000021133	Susd6	217684	17824.2	-0.280252	0.0393523	-7.12161	1.06672e-12	1.31346e-11
ENSMUSG00000082062	Ftl2-ps	14337	158692	0.266011	0.0373595	7.12032	1.07677e-12	1.32488e-11
ENSMUSG00000028456	Unc13b	22249	501.473	-0.70633	0.0992077	-7.11972	1.0815e-12	1.32973e-11
ENSMUSG00000096957	E230013L22Rik	102132	62.228	1.85067	0.260016	7.11751	1.09894e-12	1.34923e-11
ENSMUSG00000026718	Stam	20844	1916.32	-0.491765	0.0691275	-7.11387	1.1283e-12	1.38428e-11
ENSMUSG00000022419	Deptor	97998	578.158	-0.844699	0.118837	-7.10807	1.17681e-12	1.44275e-11
ENSMUSG00000075415	Fnbp1	14269	8097.27	-0.245332	0.0345571	-7.09934	1.25355e-12	1.53574e-11
ENSMUSG00000032086	Bace1	23821	694.596	-0.809011	0.113962	-7.09897	1.25691e-12	1.53874e-11
ENSMUSG00000031813	Mvb12a	73711	2191.01	0.387145	0.0545437	7.09789	1.26675e-12	1.54968e-11
ENSMUSG00000018340	Anxa6	11749	10036.7	-0.337356	0.0475389	-7.09643	1.28025e-12	1.56507e-11
ENSMUSG00000018476	Kdm6b	216850	40.1209	2.42294	0.341804	7.08867	1.35411e-12	1.65418e-11
ENSMUSG00000048307	Ankrd46	68839	2287.94	-0.376402	0.0531256	-7.08513	1.38911e-12	1.69571e-11
ENSMUSG00000020785	Camkk1	55984	1031.65	-0.533837	0.0753489	-7.08487	1.39173e-12	1.69769e-11
ENSMUSG00000030208	Emp1	13730	2285.39	0.505597	0.0713836	7.08281	1.41263e-12	1.72195e-11
ENSMUSG00000034917	Tjp3	27375	574.622	-0.616207	0.0870218	-7.08107	1.4305e-12	1.74249e-11
ENSMUSG00000042705	Commd10	69456	1929.1	0.48715	0.0688173	7.07889	1.45313e-12	1.76878e-11
ENSMUSG00000017466	Timp2	21858	44066.5	-0.277231	0.0391659	-7.07837	1.45857e-12	1.77415e-11
ENSMUSG00000035397	Klf16	118445	361.328	0.82363	0.116383	7.07689	1.47425e-12	1.79194e-11
ENSMUSG00000073902	Gm1966	434223	273.274	-1.09204	0.154346	-7.07528	1.49147e-12	1.81158e-11
ENSMUSG00000005949	Ctns	83429	2708.57	-0.451861	0.0638841	-7.07313	1.51473e-12	1.83852e-11
ENSMUSG00000058542	Gm15590	100270751	163351	0.262603	0.037137	7.07122	1.53579e-12	1.86275e-11
ENSMUSG00000040907	Atp1a3	232975	7094.14	-0.344231	0.0487229	-7.06508	1.60518e-12	1.94414e-11
ENSMUSG00000074994	Qser1	99003	808.205	-0.553128	0.0782893	-7.06518	1.60407e-12	1.94414e-11
ENSMUSG00000050619	Zscan29	99334	2365.96	-0.362664	0.0513823	-7.05815	1.68729e-12	2.04214e-11
ENSMUSG00000073889	Il11ra1	16157	2609.62	0.376785	0.0534071	7.05496	1.72645e-12	2.08656e-11
ENSMUSG00000046636	Gm7729	665646	203.915	0.977907	0.138637	7.05373	1.74189e-12	2.10373e-11
ENSMUSG00000045817	Zfp36l2	12193	9719.99	-0.272391	0.0386203	-7.05305	1.75034e-12	2.11244e-11
ENSMUSG00000039234	Sec24d	69608	3637.77	0.335182	0.0475336	7.05148	1.77023e-12	2.13494e-11
ENSMUSG00000021248	Tmed10	68581	13351.7	0.248952	0.0353122	7.05002	1.78898e-12	2.15601e-11
ENSMUSG00000037613	Tnfrsf23	79201	913.546	0.655176	0.0930569	7.0406	1.9142e-12	2.3053e-11
ENSMUSG00000048490	Nrip1	268903	3934.12	0.415561	0.0590392	7.03873	1.93996e-12	2.33439e-11
ENSMUSG00000034024	Cct2	12461	4735.43	0.287066	0.0407843	7.03865	1.9411e-12	2.33439e-11
ENSMUSG00000025503	Taldo1	21351	25195	0.343225	0.0487809	7.03605	1.97759e-12	2.3766e-11
ENSMUSG00000021178	Psmc1	19179	6101.06	0.292719	0.0416097	7.03488	1.99428e-12	2.39497e-11
ENSMUSG00000061613	U2af1	108121	1674.54	0.384636	0.0546982	7.03196	2.03652e-12	2.44396e-11
ENSMUSG00000044952	Kctd21	622320	1164.36	-0.5625	0.0800158	-7.02986	2.06738e-12	2.47925e-11
ENSMUSG00000085498	Gm14023	100503468	31.2853	3.1359	0.446169	7.0285	2.08767e-12	2.50007e-11
ENSMUSG00000063077	Kif1b	16561	5863.64	-0.421336	0.0599464	-7.02854	2.08704e-12	2.50007e-11
ENSMUSG00000005198	Polr2a	20020	5304.39	-0.472008	0.067181	-7.02591	2.12672e-12	2.54504e-11
ENSMUSG00000087107	AI662270	100043636	2070.14	0.462608	0.0659066	7.01915	2.23219e-12	2.66938e-11
ENSMUSG00000079575	Rbpj-ps3	19667	3776.83	0.296964	0.04233	7.01544	2.29219e-12	2.73921e-11
ENSMUSG00000067825	Pex26	74043	449.826	-0.821791	0.117245	-7.0092	2.39692e-12	2.86236e-11
ENSMUSG00000031337	Mtm1	17772	1899.96	0.377743	0.0539018	7.00799	2.41771e-12	2.88515e-11
ENSMUSG00000028385	Snx30	209131	3795.24	-0.346651	0.0494954	-7.0037	2.49287e-12	2.97069e-11
ENSMUSG00000078452	Raet1d	56554	189.917	1.20058	0.171419	7.00379	2.49134e-12	2.97069e-11
ENSMUSG00000061436	Hipk2	15258	5657.75	-0.448041	0.0640213	-6.99831	2.5907e-12	3.08511e-11
ENSMUSG00000041769	Ppp2r2d	52432	1246.56	0.410841	0.0587231	6.99624	2.62931e-12	3.1289e-11
ENSMUSG00000002227	Mov10	17454	2566.4	-0.627788	0.0897592	-6.99413	2.66902e-12	3.17394e-11
ENSMUSG00000027009	Itga4	16401	3207.64	-0.58235	0.0832739	-6.99319	2.68699e-12	3.19307e-11
ENSMUSG00000043065	Spice1	212514	604.587	-0.709805	0.101501	-6.99305	2.68968e-12	3.19404e-11
ENSMUSG00000020766	Galk1	14635	1683.19	0.460999	0.0659497	6.99016	2.74579e-12	3.25815e-11
ENSMUSG00000036905	C1qb	12260	95045.4	-0.251751	0.0360155	-6.99007	2.74749e-12	3.25815e-11
ENSMUSG00000039041	Adrm1	56436	3343.02	0.345276	0.0494334	6.98466	2.85537e-12	3.38138e-11
ENSMUSG00000026249	Serpine2	20720	1384.01	-0.598114	0.0856544	-6.98287	2.89204e-12	3.42241e-11
ENSMUSG00000097989	Gm4335	100043283	350.036	0.738117	0.105713	6.98228	2.90417e-12	3.43439e-11
ENSMUSG00000031843	Mphosph6	68533	470.941	0.774397	0.110919	6.98166	2.91715e-12	3.4471e-11
ENSMUSG00000026219	Trip12	14897	8154.94	-0.340565	0.0487806	-6.98157	2.91897e-12	3.4471e-11
ENSMUSG00000044894	Uqcrq	22272	2690.59	0.507474	0.0727414	6.97641	3.02822e-12	3.57364e-11
ENSMUSG00000020021	Fgd6	13998	1584.32	-0.445611	0.0638918	-6.97446	3.07043e-12	3.62094e-11
ENSMUSG00000034826	Nup54	269113	1424.27	0.517257	0.0741668	6.97424	3.07521e-12	3.62407e-11
ENSMUSG00000019433	Gipc1	67903	4295.95	0.355556	0.0510249	6.9683	3.20804e-12	3.77799e-11
ENSMUSG00000086851	A430108G06Rik	319650	141.93	-1.52331	0.218624	-6.96771	3.22152e-12	3.79125e-11
ENSMUSG00000050592	Fam78a	241303	660.107	-0.558755	0.080238	-6.96373	3.31386e-12	3.89722e-11
ENSMUSG00000038204	Asb10	117590	362.191	-0.994408	0.142925	-6.95757	3.4619e-12	4.06851e-11
ENSMUSG00000035352	Ccl12	20293	1720.15	1.87688	0.269865	6.95488	3.5286e-12	4.14404e-11
ENSMUSG00000082896	Gm5844	545508	1352.5	0.421408	0.0606405	6.94928	3.67144e-12	4.30882e-11
ENSMUSG00000055069	Rab39	270160	543.092	-0.747391	0.107559	-6.94866	3.68769e-12	4.3249e-11
ENSMUSG00000057762	Gm6169	620648	1157.88	0.482169	0.069506	6.93708	4.00275e-12	4.69118e-11
ENSMUSG00000029229	Chic2	74277	2182.05	0.365587	0.0527144	6.93525	4.05491e-12	4.74905e-11
ENSMUSG00000022100	Xpo7	65246	3655.04	-0.308864	0.0445384	-6.93478	4.06864e-12	4.76185e-11
ENSMUSG00000055994	Nod2	257632	202.428	1.2671	0.182721	6.93463	4.07294e-12	4.76361e-11
ENSMUSG00000032085	Tagln	21345	312.191	-1.29789	0.187183	-6.93377	4.09764e-12	4.7892e-11
ENSMUSG00000058318	Phf21a	192285	927.557	-0.606127	0.0874207	-6.93345	4.1071e-12	4.79697e-11
ENSMUSG00000034560	Washc4	319277	9015.84	-0.334677	0.0483122	-6.92738	4.28712e-12	5.00379e-11
ENSMUSG00000034205	Loxl2	94352	133.548	-1.62954	0.23526	-6.92653	4.313e-12	5.03055e-11
ENSMUSG00000021703	Serinc5	218442	1655.21	-0.435743	0.0629234	-6.92497	4.36069e-12	5.0827e-11
ENSMUSG00000044674	Fzd1	14362	609.263	0.772588	0.111751	6.91349	4.72876e-12	5.50794e-11
ENSMUSG00000030541	Idh2	269951	4734.49	0.338882	0.0490287	6.91191	4.78161e-12	5.56569e-11
ENSMUSG00000031365	Zfp275	27081	1009.11	0.450554	0.0652123	6.90903	4.87971e-12	5.67213e-11
ENSMUSG00000028551	Cdkn2c	12580	594.531	-0.612423	0.0886409	-6.90904	4.87961e-12	5.67213e-11
ENSMUSG00000062382	Ftl1-ps1	634386	263622	0.261912	0.0379126	6.90831	4.90478e-12	5.69738e-11
ENSMUSG00000023004	Tuba1b	22143	32916.2	0.265848	0.0385037	6.90447	5.03899e-12	5.84928e-11
ENSMUSG00000038615	Nfe2l1	18023	11504.6	0.284629	0.0412471	6.90058	5.17907e-12	6.00779e-11
ENSMUSG00000025224	Gbf1	107338	2508.71	-0.459792	0.0666337	-6.9003	5.18938e-12	6.01565e-11
ENSMUSG00000089999	Gm6485	624251	260.896	0.961173	0.139324	6.89881	5.2439e-12	6.07472e-11
ENSMUSG00000038145	Snrk	20623	2153.49	-0.52847	0.0766157	-6.89767	5.28626e-12	6.11963e-11
ENSMUSG00000015247	Nipsnap3b	66536	4548.19	0.294557	0.0427279	6.89379	5.4324e-12	6.28401e-11
ENSMUSG00000006057	Atp5g1	11951	3304.85	0.386739	0.0561002	6.89371	5.43564e-12	6.28401e-11
ENSMUSG00000005779	Psmb4	19172	3592.74	0.342023	0.0496368	6.8905	5.55947e-12	6.42281e-11
ENSMUSG00000054675	Tmem119	231633	319.937	0.819518	0.118971	6.88841	5.64195e-12	6.51368e-11
ENSMUSG00000044030	Irf2bp1	272359	1320.64	-0.477542	0.0693332	-6.88764	5.67265e-12	6.54469e-11
ENSMUSG00000073771	Btbd19	78611	306.584	0.849486	0.123407	6.88359	5.83636e-12	6.72901e-11
ENSMUSG00000023990	Tfeb	21425	1214.6	-0.554249	0.0805295	-6.88256	5.87851e-12	6.77301e-11
ENSMUSG00000027699	Ect2	13605	566.332	-0.755489	0.109779	-6.88192	5.90504e-12	6.79898e-11
ENSMUSG00000078619	Smarcd2	83796	4150.99	-0.296017	0.0430328	-6.87889	6.03226e-12	6.94077e-11
ENSMUSG00000042133	Ppig	228005	2306.75	0.332051	0.0483115	6.87312	6.28112e-12	7.22223e-11
ENSMUSG00000004771	Rab11a	53869	8072.43	0.241295	0.035118	6.87099	6.37601e-12	7.32638e-11
ENSMUSG00000021356	Irf4	16364	150.713	-1.23592	0.179888	-6.8705	6.39788e-12	7.34656e-11
ENSMUSG00000068134	Zfp120	104348	1015.21	-0.570373	0.0830289	-6.86957	6.43937e-12	7.38922e-11
ENSMUSG00000023805	Synj2	20975	1522.58	0.536521	0.0781389	6.86625	6.59124e-12	7.5584e-11
ENSMUSG00000029752	Asns	27053	2239.07	0.372023	0.0541977	6.86418	6.68733e-12	7.66343e-11
ENSMUSG00000006273	Atp6v1b2	11966	27618.8	-0.244845	0.0356857	-6.86115	6.83104e-12	7.82285e-11
ENSMUSG00000050708	Ftl1	14325	516487	0.256128	0.0373413	6.8591	6.92948e-12	7.93025e-11
ENSMUSG00000073538	E330020D12Rik	626058	84.981	-1.44554	0.210789	-6.85776	6.99468e-12	7.99949e-11
ENSMUSG00000036825	Ssx2ip	99167	1526.64	0.414277	0.0604169	6.85697	7.03366e-12	8.03867e-11
ENSMUSG00000062038	Gm10108	670717	1304.24	0.583452	0.0851103	6.85524	7.11913e-12	8.1309e-11
ENSMUSG00000027878	Notch2	18129	6399.61	-0.825724	0.120494	-6.85285	7.23939e-12	8.25718e-11
ENSMUSG00000094737	Gm17045	100417766	374.694	0.775529	0.113213	6.85018	7.37572e-12	8.40704e-11
ENSMUSG00000038388	Mpp6	56524	1667.51	0.371724	0.0543066	6.84492	7.65181e-12	8.71008e-11
ENSMUSG00000030148	Clec4a2	26888	1125.51	-0.646702	0.0944784	-6.84498	7.64867e-12	8.71008e-11
ENSMUSG00000032477	Cdc25a	12530	724.423	0.635	0.0927741	6.84459	7.66961e-12	8.7245e-11
ENSMUSG00000024583	Txnl1	53382	3657.1	0.332686	0.0486862	6.83328	8.29932e-12	9.43452e-11
ENSMUSG00000051390	Zbtb22	81630	1255.9	0.480981	0.0704245	6.82975	8.50656e-12	9.66366e-11
ENSMUSG00000037475	Thoc2	331401	3148.92	-0.35192	0.0515603	-6.82541	8.76757e-12	9.95353e-11
ENSMUSG00000025357	Dgka	13139	711.472	-0.60277	0.0883312	-6.82398	8.8555e-12	1.00467e-10
ENSMUSG00000020196	Cabin1	104248	3097.02	-0.297279	0.0435664	-6.82358	8.87979e-12	1.00675e-10
ENSMUSG00000028060	Khdc4	74200	2195.86	-0.398053	0.0583721	-6.81923	9.15304e-12	1.03704e-10
ENSMUSG00000053553	3110082I17Rik	73212	654.822	0.604385	0.0886321	6.81903	9.16571e-12	1.03779e-10
ENSMUSG00000018923	Med11	66172	1078.43	0.474906	0.0696896	6.81459	9.45318e-12	1.06962e-10
ENSMUSG00000030421	Uri1	19777	1965.33	0.401662	0.0589545	6.8131	9.55198e-12	1.08008e-10
ENSMUSG00000083287	Gm13502	207933	302.815	0.834397	0.122499	6.81148	9.6601e-12	1.09158e-10
ENSMUSG00000102644	Thap6	381650	261.035	1.13968	0.167345	6.81036	9.73536e-12	1.09936e-10
ENSMUSG00000021224	Numb	18222	2032.4	-0.357511	0.0524963	-6.8102	9.74599e-12	1.09983e-10
ENSMUSG00000042608	Stk40	74178	1967.43	0.480441	0.0705537	6.80958	9.78814e-12	1.10386e-10
ENSMUSG00000039853	Trim14	74735	1557.41	-0.627116	0.0921002	-6.80906	9.82375e-12	1.10714e-10
ENSMUSG00000043336	Filip1l	78749	993.791	0.723689	0.106341	6.8054	1.00772e-11	1.13496e-10
ENSMUSG00000028700	Pomgnt1	68273	2268.38	0.344852	0.0506916	6.80295	1.02501e-11	1.15366e-10
ENSMUSG00000037503	Fam168b	214469	13152.3	-0.257847	0.0379081	-6.8019	1.03246e-11	1.16127e-10
ENSMUSG00000034424	Gcsh	68133	1536.9	0.435355	0.0640645	6.79557	1.07885e-11	1.21266e-10
ENSMUSG00000009863	Sdhb	67680	5805.92	0.235266	0.0346255	6.79458	1.08626e-11	1.22018e-10
ENSMUSG00000028277	Ube2j1	56228	4652.12	0.401291	0.0590751	6.79289	1.09907e-11	1.23376e-10
ENSMUSG00000027285	Haus2	66296	1456.85	0.457539	0.0674439	6.784	1.16894e-11	1.31132e-10
ENSMUSG00000042500	Ago4	76850	1551.58	-0.748562	0.110412	-6.77974	1.20391e-11	1.34966e-10
ENSMUSG00000034152	Exoc3	211446	3445.05	-0.305069	0.0450039	-6.77874	1.2123e-11	1.35817e-10
ENSMUSG00000039530	Tusc3	80286	2549.87	0.405276	0.0597976	6.77747	1.223e-11	1.36927e-10
ENSMUSG00000030213	Atf7ip	54343	2107.88	-0.573648	0.0846575	-6.7761	1.23463e-11	1.38137e-10
ENSMUSG00000031586	Rbpms	19663	964.026	0.672359	0.0992842	6.77206	1.2696e-11	1.41957e-10
ENSMUSG00000025949	Pikfyve	18711	4040.28	-0.483448	0.071462	-6.7651	1.33219e-11	1.48857e-10
ENSMUSG00000056076	Eif3b	27979	8262.94	0.246006	0.0363659	6.76475	1.33539e-11	1.49117e-10
ENSMUSG00000079658	Eloc	67923	2944.59	0.321777	0.0476438	6.75381	1.44014e-11	1.60709e-10
ENSMUSG00000070939	Tgfbrap1	73122	2938.42	-0.385591	0.0571534	-6.74659	1.51364e-11	1.688e-10
ENSMUSG00000042599	Kdm7a	338523	4213.12	0.492665	0.0730445	6.74473	1.53312e-11	1.70861e-10
ENSMUSG00000026433	Rab29	226422	1269.76	-0.438496	0.065059	-6.73997	1.58416e-11	1.76434e-10
ENSMUSG00000052270	Fpr2	14289	956.213	1.12985	0.167801	6.73329	1.65873e-11	1.84617e-10
ENSMUSG00000024359	Hspa9	15526	14528.6	0.25895	0.0384605	6.73289	1.66324e-11	1.84998e-10
ENSMUSG00000083311	Gm5643	434858	196.956	1.0305	0.153119	6.73009	1.6956e-11	1.88475e-10
ENSMUSG00000091931	Gon7	100233175	249.283	-0.847962	0.126148	-6.72196	1.79295e-11	1.99166e-10
ENSMUSG00000024921	Smarca2	67155	2209.38	-0.319292	0.0475041	-6.72137	1.80029e-11	1.99851e-10
ENSMUSG00000022091	Sorbs3	20410	780.826	-0.782781	0.116626	-6.71192	1.92083e-11	2.13093e-10
ENSMUSG00000068284	Usf3	207806	621.626	-0.595499	0.0887627	-6.70889	1.9611e-11	2.17419e-10
ENSMUSG00000082809	Gm14150	100043840	8503.91	0.285158	0.0425248	6.7057	2.00449e-11	2.22084e-10
ENSMUSG00000030269	Mtmr14	97287	4299.44	0.369774	0.0551457	6.7054	2.00856e-11	2.22391e-10
ENSMUSG00000020064	Herc4	67345	3085.4	-0.437463	0.0652441	-6.70502	2.01384e-11	2.22831e-10
ENSMUSG00000024150	Mcfd2	193813	7349.53	0.270272	0.0403357	6.70055	2.0763e-11	2.29593e-10
ENSMUSG00000036893	Ehmt1	77683	2195.01	-0.379614	0.0566791	-6.69759	2.1188e-11	2.34141e-10
ENSMUSG00000022415	Syngr1	20972	7090.01	0.295562	0.0441342	6.69689	2.12897e-11	2.35112e-10
ENSMUSG00000038150	Ormdl3	66612	1423.83	-0.377822	0.0564528	-6.6927	2.19096e-11	2.41801e-10
ENSMUSG00000025178	Pi4k2a	84095	7831.99	0.30938	0.0462347	6.6915	2.20892e-11	2.43625e-10
ENSMUSG00000045128	Rpl18a	76808	11984.2	-0.246706	0.036877	-6.68996	2.23239e-11	2.46054e-10
ENSMUSG00000028053	Ash1l	192195	1729.48	-0.706911	0.105673	-6.68959	2.23798e-11	2.46511e-10
ENSMUSG00000047810	Ccdc88b	78317	3478.7	0.538685	0.0805435	6.68812	2.26049e-11	2.48829e-10
ENSMUSG00000030652	Coq7	12850	700.096	0.615703	0.0921102	6.68441	2.31854e-11	2.55054e-10
ENSMUSG00000071715	Ncf4	17972	7412.47	0.324252	0.0485104	6.68418	2.32227e-11	2.553e-10
ENSMUSG00000026439	Rbbp5	213464	2816.3	-0.35899	0.0537104	-6.68381	2.32802e-11	2.55766e-10
ENSMUSG00000020671	Rab10	19325	17725	0.234055	0.0350306	6.68145	2.36587e-11	2.59758e-10
ENSMUSG00000074280	Gm6166	101056162	6235.61	-0.282461	0.0422959	-6.67822	2.41861e-11	2.65377e-10
ENSMUSG00000079111	Kdelr2	66913	1899.32	0.34727	0.052009	6.67711	2.43701e-11	2.67224e-10
ENSMUSG00000024247	Pkdcc	106522	799.074	0.528719	0.0792239	6.67374	2.49368e-11	2.73261e-10
ENSMUSG00000035437	Rabgap1	227800	4390.34	-0.360288	0.0540426	-6.66673	2.61565e-11	2.86443e-10
ENSMUSG00000026342	Slc35f5	74150	3712.43	-0.288802	0.0433292	-6.6653	2.64127e-11	2.89063e-10
ENSMUSG00000052681	Rap1b	215449	25413.2	0.210208	0.0315594	6.6607	2.72522e-11	2.98059e-10
ENSMUSG00000020376	Rnf130	59044	13960.5	-0.277346	0.0416624	-6.657	2.79479e-11	3.05471e-10
ENSMUSG00000037896	Rcor1	217864	3576.53	-0.31023	0.0466453	-6.65084	2.91431e-11	3.1833e-10
ENSMUSG00000032020	Ubash3b	72828	2765.37	0.48446	0.0728787	6.64748	2.98157e-11	3.25469e-10
ENSMUSG00000052137	Rbm12b2	77604	676.452	-0.491793	0.0740001	-6.64584	3.01491e-11	3.28897e-10
ENSMUSG00000024642	Tle4	21888	3485.1	-0.308513	0.0464252	-6.64538	3.0243e-11	3.29711e-10
ENSMUSG00000025278	Flnb	286940	1627.15	-0.716516	0.107849	-6.64367	3.0597e-11	3.33356e-10
ENSMUSG00000008496	Pou2f2	18987	1579.29	-0.631468	0.0950525	-6.64336	3.06608e-11	3.33839e-10
ENSMUSG00000052102	Gnpda1	26384	7520.77	-0.344541	0.0518701	-6.64239	3.08644e-11	3.3584e-10
ENSMUSG00000097944	A130014A01Rik	402737	149.082	-1.08255	0.162979	-6.64227	3.08887e-11	3.3589e-10
ENSMUSG00000025804	Ccr1	12768	9750.41	-0.315669	0.047537	-6.64049	3.12642e-11	3.39756e-10
ENSMUSG00000033059	Pygb	110078	5046.96	-0.248973	0.0375078	-6.63791	3.18157e-11	3.45529e-10
ENSMUSG00000038811	Gngt2	14710	1937.54	0.396448	0.0597418	6.63602	3.22277e-11	3.4978e-10
ENSMUSG00000030199	Etv6	14011	3944.18	0.425236	0.0641055	6.63338	3.28083e-11	3.55855e-10
ENSMUSG00000030878	Cdr2	12585	453.321	0.776717	0.117104	6.63272	3.29547e-11	3.57216e-10
ENSMUSG00000099858	Gm6652	626096	434.049	-0.605231	0.0912897	-6.62978	3.36185e-11	3.6418e-10
ENSMUSG00000045287	Rtn4rl1	237847	958.719	-0.66008	0.0996454	-6.62429	3.48931e-11	3.77746e-10
ENSMUSG00000038780	Smurf1	75788	3391.46	0.313553	0.0473447	6.62276	3.5255e-11	3.81421e-10
ENSMUSG00000024074	Crim1	50766	2405.05	-0.435545	0.0657968	-6.61954	3.60313e-11	3.89573e-10
ENSMUSG00000054520	Sh3bp2	24055	5792.71	0.251876	0.0380621	6.6175	3.65327e-11	3.94743e-10
ENSMUSG00000021559	Dapk1	69635	2706.96	0.512167	0.0774231	6.61516	3.71138e-11	4.00768e-10
ENSMUSG00000022889	Mrpl39	27393	1347.73	0.386695	0.058472	6.61333	3.75771e-11	4.05514e-10
ENSMUSG00000039770	Ypel5	383295	4997.35	0.228486	0.0345916	6.60525	3.96842e-11	4.27981e-10
ENSMUSG00000032598	Nckipsd	80987	1521.93	-0.40521	0.0613493	-6.60497	3.97593e-11	4.2852e-10
ENSMUSG00000025001	Hells	15201	558.706	0.80299	0.121718	6.59712	4.19224e-11	4.51263e-10
ENSMUSG00000025958	Creb1	12912	3114.91	-0.350925	0.0532284	-6.59282	4.31548e-11	4.64235e-10
ENSMUSG00000002346	Slc25a42	73095	178.707	-1.01256	0.153627	-6.59099	4.36896e-11	4.69691e-10
ENSMUSG00000022193	Psmb5	19173	2574.88	0.430975	0.065408	6.58903	4.42723e-11	4.75655e-10
ENSMUSG00000005034	Prkacb	18749	8085.99	-0.288119	0.0437409	-6.58695	4.48957e-11	4.82048e-10
ENSMUSG00000005125	Ndrg1	17988	718.852	-0.641416	0.0973999	-6.58538	4.53715e-11	4.8685e-10
ENSMUSG00000020946	Gosr2	56494	7132.06	0.308909	0.0469091	6.58527	4.54063e-11	4.86917e-10
ENSMUSG00000062345	Serpinb2	18788	94.7399	2.58188	0.392083	6.58503	4.54798e-11	4.87399e-10
ENSMUSG00000048832	Vps37c	107305	3488.53	0.402817	0.0611966	6.58234	4.63092e-11	4.95975e-10
ENSMUSG00000047804	Akap10	56697	4061.38	-0.362299	0.0550525	-6.58096	4.67424e-11	5.00299e-10
ENSMUSG00000000628	Hk2	15277	1566.96	0.51505	0.0782729	6.58018	4.69875e-11	5.02607e-10
ENSMUSG00000039783	Kmo	98256	40.7784	-2.15356	0.327344	-6.57888	4.74012e-11	5.06714e-10
ENSMUSG00000027566	Psma7	26444	5845.42	0.319115	0.0485403	6.57423	4.89056e-11	5.22467e-10
ENSMUSG00000025150	Cbr2	12409	59.2156	1.75044	0.266274	6.57381	4.90427e-11	5.23604e-10
ENSMUSG00000030042	Pole4	66979	2310.23	0.348973	0.0530878	6.5735	4.91465e-11	5.24383e-10
ENSMUSG00000033099	Nol12	97961	824.463	0.500492	0.0762003	6.56811	5.09593e-11	5.43385e-10
ENSMUSG00000023961	Enpp4	224794	1503.23	-0.761233	0.115921	-6.56685	5.13906e-11	5.47641e-10
ENSMUSG00000022205	Sub1	20024	3446.47	0.321881	0.0490174	6.56668	5.14507e-11	5.47939e-10
ENSMUSG00000038286	Bphl	68021	989.068	-0.415312	0.0632951	-6.56152	5.32628e-11	5.66883e-10
ENSMUSG00000027479	Mapre1	13589	10734.1	0.220094	0.0335464	6.56089	5.34866e-11	5.68909e-10
ENSMUSG00000038545	Cul7	66515	858.648	-0.478025	0.0728989	-6.55736	5.47686e-11	5.82182e-10
ENSMUSG00000028843	Sh3bgrl3	73723	8568.66	0.342129	0.0521788	6.55686	5.49539e-11	5.83787e-10
ENSMUSG00000025058	5430427O19Rik	71398	1788.83	0.386253	0.058937	6.55366	5.6144e-11	5.96057e-10
ENSMUSG00000016495	Plgrkt	67759	2422.35	0.336938	0.0514133	6.55351	5.61996e-11	5.9615e-10
ENSMUSG00000062376	Borcs7	66439	461.795	0.665368	0.101529	6.55345	5.62228e-11	5.9615e-10
ENSMUSG00000027634	Ndrg3	29812	2081.06	-0.352136	0.0537834	-6.54731	5.85831e-11	6.20791e-10
ENSMUSG00000089774	Slc5a3	53881	387.953	-1.10322	0.168583	-6.54405	5.98763e-11	6.341e-10
ENSMUSG00000024785	Rcl1	59028	696.538	0.557355	0.0852569	6.53736	6.26155e-11	6.62697e-10
ENSMUSG00000025287	Acot9	56360	2315.61	0.366191	0.0560676	6.53125	6.52243e-11	6.89878e-10
ENSMUSG00000038175	Mylip	218203	7026.83	0.283897	0.043493	6.52741	6.69148e-11	7.0732e-10
ENSMUSG00000056904	Gm5620	434428	4198.47	0.340633	0.0521993	6.52563	6.77159e-11	7.15344e-10
ENSMUSG00000033705	Stard9	668880	2439.17	-1.03049	0.157927	-6.52515	6.79347e-11	7.1721e-10
ENSMUSG00000027746	Ufm1	67890	2123.3	0.328322	0.0503317	6.52316	6.8841e-11	7.26328e-10
ENSMUSG00000093798	Gm8355	666904	8033.49	-0.302166	0.0463385	-6.52085	6.99119e-11	7.3717e-10
ENSMUSG00000059811	Atl2	56298	1709.91	0.333466	0.0511891	6.5144	7.29831e-11	7.69077e-10
ENSMUSG00000032812	Arap1	69710	18097	-0.21085	0.032368	-6.51415	7.3101e-11	7.69843e-10
ENSMUSG00000058446	Znrf2	387524	7638.6	-0.247629	0.038033	-6.5109	7.47007e-11	7.86204e-10
ENSMUSG00000003062	Stard3nl	76205	4496.13	0.253671	0.0389746	6.50863	7.5838e-11	7.97681e-10
ENSMUSG00000022864	D16Ertd472e	67102	122.738	1.28459	0.197385	6.50805	7.61343e-11	8.00303e-10
ENSMUSG00000066306	Numa1	101706	8154.19	-0.282163	0.0433958	-6.50207	7.92197e-11	8.32223e-10
ENSMUSG00000022945	Chaf1b	110749	614.052	0.633296	0.0974587	6.4981	8.13415e-11	8.53985e-10
ENSMUSG00000025393	Atp5b	11947	38562.3	0.21165	0.0325927	6.4938	8.36993e-11	8.78198e-10
ENSMUSG00000033174	Mgll	23945	135.191	-1.63472	0.251742	-6.49366	8.37766e-11	8.78468e-10
ENSMUSG00000024896	Minpp1	17330	3196.44	0.28366	0.0436903	6.49252	8.44112e-11	8.84577e-10
ENSMUSG00000003123	Lipe	16890	668.551	-0.625477	0.0963661	-6.49063	8.54779e-11	8.95205e-10
ENSMUSG00000079225	Gm9531	671392	1509.77	0.472338	0.0728142	6.4869	8.76202e-11	9.17077e-10
ENSMUSG00000079481	Nhsl2	100042480	409.658	-0.878131	0.135402	-6.48535	8.85244e-11	9.25752e-10
ENSMUSG00000038712	Mindy1	75007	4636.85	0.287756	0.0443705	6.4853	8.85578e-11	9.25752e-10
ENSMUSG00000015656	Hspa8	15481	76749.8	-0.264589	0.040804	-6.4844	8.90868e-11	9.30711e-10
ENSMUSG00000054051	Ercc6	319955	782.493	0.497354	0.0767033	6.48413	8.92457e-11	9.31799e-10
ENSMUSG00000037826	Ppm1k	243382	549.447	-0.594278	0.0916724	-6.48262	9.01412e-11	9.40572e-10
ENSMUSG00000053754	Chd8	67772	1581.15	-0.468256	0.0722535	-6.48073	9.12786e-11	9.51857e-10
ENSMUSG00000057315	Arhgap24	231532	993.062	0.536142	0.0827708	6.47743	9.32951e-11	9.7229e-10
ENSMUSG00000028126	Pip5k1a	18720	1190.45	0.437493	0.0675477	6.4768	9.36871e-11	9.75778e-10
ENSMUSG00000047888	Tnrc6b	213988	824.764	-0.749588	0.115765	-6.47507	9.47669e-11	9.86422e-10
ENSMUSG00000025369	Smarcc2	68094	8225.62	-0.265747	0.0410703	-6.47055	9.76484e-11	1.01579e-09
ENSMUSG00000022892	App	11820	45189.1	0.240615	0.0371916	6.46961	9.82537e-11	1.02147e-09
ENSMUSG00000011884	Gltp	56356	17754	-0.175638	0.0271564	-6.46766	9.95332e-11	1.03414e-09
ENSMUSG00000024098	Twsg1	65960	2942.91	0.431937	0.0668059	6.46555	1.00932e-10	1.04803e-09
ENSMUSG00000020495	Smg8	74133	1784.72	0.366797	0.0567368	6.46488	1.01377e-10	1.05201e-09
ENSMUSG00000019189	Rnf145	74315	5549.36	-0.232335	0.035943	-6.46399	1.01977e-10	1.05759e-09
ENSMUSG00000024539	Ptpn2	19255	1224.06	0.481058	0.0744413	6.46224	1.03162e-10	1.06923e-09
ENSMUSG00000022673	Mcm4	17217	1910.88	0.506673	0.0784223	6.46083	1.04132e-10	1.07797e-09
ENSMUSG00000059248	2021-09-09	53860	4648.2	0.285721	0.0442398	6.45846	1.05773e-10	1.0943e-09
ENSMUSG00000039621	Prex1	277360	20790.3	-0.274994	0.0425883	-6.45703	1.06778e-10	1.10388e-09
ENSMUSG00000009654	Oit3	18302	143.949	1.44636	0.224	6.45696	1.06829e-10	1.10388e-09
ENSMUSG00000006732	Mettl1	17299	252.972	0.872935	0.135292	6.45222	1.10225e-10	1.13828e-09
ENSMUSG00000042408	Zmym6	100177	796.934	-0.590081	0.0914865	-6.44992	1.11911e-10	1.15499e-09
ENSMUSG00000084817	Gm5526	433297	3490.65	0.309972	0.0481178	6.44194	1.17953e-10	1.21661e-09
ENSMUSG00000030751	Psma1	26440	7792.34	0.27142	0.0421433	6.44041	1.19151e-10	1.22823e-09
ENSMUSG00000063856	Gpx1	14775	14507	0.283722	0.0440565	6.43996	1.19503e-10	1.23111e-09
ENSMUSG00000021113	Snapc1	75627	567.767	0.609252	0.0946126	6.43944	1.19912e-10	1.23457e-09
ENSMUSG00000028337	Coro2a	107684	1290.63	-0.603929	0.0938356	-6.43603	1.22639e-10	1.26189e-09
ENSMUSG00000014470	Rnf166	68718	2577.42	-0.353148	0.0548727	-6.43577	1.2285e-10	1.26329e-09
ENSMUSG00000034120	Srsf2	20382	3431.95	0.34632	0.0538168	6.43516	1.23347e-10	1.26764e-09
ENSMUSG00000048007	Timm8a1	30058	590.719	0.536386	0.0833585	6.43469	1.23727e-10	1.27078e-09
ENSMUSG00000025921	Rdh10	98711	479.273	-0.615632	0.0956788	-6.43435	1.23999e-10	1.2728e-09
ENSMUSG00000006134	Crkl	12929	3198.83	-0.317714	0.0493812	-6.43391	1.24361e-10	1.27575e-09
ENSMUSG00000097979	Gm4691	100043853	437.522	0.644514	0.10021	6.4316	1.26264e-10	1.29415e-09
ENSMUSG00000024424	Ttc39c	72747	364.113	0.806547	0.125427	6.43039	1.27281e-10	1.30334e-09
ENSMUSG00000042349	Ikbke	56489	9384.71	0.346722	0.0539294	6.42918	1.28292e-10	1.31291e-09
ENSMUSG00000003812	Dnase2a	13423	4398.28	0.306696	0.0477104	6.42829	1.29047e-10	1.31984e-09
ENSMUSG00000026193	Fn1	14268	40905.6	0.705309	0.109724	6.42802	1.29274e-10	1.32137e-09
ENSMUSG00000002028	Kmt2a	214162	1376.43	-0.838585	0.130491	-6.42637	1.30691e-10	1.33426e-09
ENSMUSG00000025757	Hspa4l	18415	1279.77	0.373642	0.0581414	6.42644	1.30629e-10	1.33426e-09
ENSMUSG00000033949	Trim36	28105	256.329	1.06524	0.165804	6.42469	1.32137e-10	1.34821e-09
ENSMUSG00000048852	Gm12185	620913	119.497	-1.49499	0.23272	-6.42398	1.32758e-10	1.35373e-09
ENSMUSG00000035311	Gnptab	432486	4082.32	0.299919	0.0466964	6.42274	1.33846e-10	1.36402e-09
ENSMUSG00000031539	Ap3m2	64933	1380.22	-0.426294	0.0664085	-6.41927	1.36926e-10	1.39457e-09
ENSMUSG00000035697	Arhgap45	70719	13060.5	-0.247374	0.0385614	-6.41508	1.40746e-10	1.43261e-09
ENSMUSG00000048787	Dcun1d3	233805	956.003	0.499294	0.0778369	6.41462	1.41178e-10	1.43615e-09
ENSMUSG00000003269	Cyth2	19158	1673	0.426722	0.0665426	6.41277	1.42898e-10	1.45279e-09
ENSMUSG00000061904	Slc25a3	18674	10230.5	0.231855	0.036174	6.40944	1.46051e-10	1.48395e-09
ENSMUSG00000008035	Mid1ip1	68041	1789.9	-0.35121	0.0548389	-6.40439	1.50976e-10	1.53308e-09
ENSMUSG00000021327	Zkscan3	72739	2028.73	-0.399009	0.0623099	-6.40363	1.51729e-10	1.53981e-09
ENSMUSG00000022150	Dab2	13132	49138.1	0.305233	0.0476708	6.40293	1.52428e-10	1.54598e-09
ENSMUSG00000040269	Mrps28	66230	721.069	0.560069	0.0874737	6.40271	1.52639e-10	1.5472e-09
ENSMUSG00000037536	Fbxo34	78938	1815.19	0.447618	0.0699139	6.40241	1.52943e-10	1.54936e-09
ENSMUSG00000038697	Taf5l	102162	1719.62	0.431274	0.0673632	6.40222	1.53135e-10	1.55038e-09
ENSMUSG00000037570	Mcrs1	51812	1890.96	0.330937	0.0517489	6.39505	1.60494e-10	1.62391e-09
ENSMUSG00000015671	Psma2	19166	5680.74	0.274123	0.0428911	6.39113	1.64666e-10	1.66514e-09
ENSMUSG00000030842	Lamtor1	66508	5733.07	0.270114	0.0422707	6.39011	1.6577e-10	1.67531e-09
ENSMUSG00000020715	Ern1	78943	2412.67	-0.492093	0.0770179	-6.38934	1.66608e-10	1.68278e-09
ENSMUSG00000044876	Zfp444	72667	980.645	-0.564586	0.0883775	-6.38835	1.6769e-10	1.6927e-09
ENSMUSG00000025511	Tspan4	64540	3563.35	-0.262494	0.0411013	-6.38652	1.69706e-10	1.71204e-09
ENSMUSG00000015165	Hnrnpl	15388	6647.96	0.235537	0.0368997	6.38317	1.73462e-10	1.74889e-09
ENSMUSG00000079260	Tmppe	100504715	1754.41	-0.354603	0.0555624	-6.38208	1.74702e-10	1.76036e-09
ENSMUSG00000028967	Errfi1	74155	594.877	0.711796	0.111549	6.381	1.75934e-10	1.77172e-09
ENSMUSG00000039191	Rbpj	19664	13031.4	0.240193	0.0376521	6.37926	1.77951e-10	1.79097e-09
ENSMUSG00000020189	Osbpl8	237542	24739.6	-0.351446	0.0551023	-6.37806	1.7934e-10	1.80389e-09
ENSMUSG00000028945	Rheb	19744	4931.47	0.275764	0.0432642	6.37396	1.84204e-10	1.85171e-09
ENSMUSG00000058126	Tpm3-rs7	621054	9783.82	0.254861	0.0399871	6.37357	1.84683e-10	1.85544e-09
ENSMUSG00000045092	S1pr1	13609	14624.7	0.37218	0.0583993	6.37302	1.85344e-10	1.86098e-09
ENSMUSG00000053038	Gm6180	620772	709.043	0.596765	0.0936637	6.37135	1.87366e-10	1.88017e-09
ENSMUSG00000052419	2610001J05Rik	66520	3554.48	0.255906	0.0401757	6.36968	1.89426e-10	1.89972e-09
ENSMUSG00000018287	Spag7	216873	1978.92	0.287893	0.0452008	6.3692	1.90013e-10	1.90354e-09
ENSMUSG00000022604	Cep97	74201	234.303	-0.936204	0.146989	-6.36919	1.9003e-10	1.90354e-09
ENSMUSG00000026879	Gsn	227753	18522	0.23347	0.0366708	6.36663	1.93229e-10	1.93445e-09
ENSMUSG00000090946	Ccdc71l	72123	3876.61	0.419004	0.065828	6.36514	1.95113e-10	1.95216e-09
ENSMUSG00000095865	Gm13237	666390	492.297	0.656529	0.103173	6.36341	1.97325e-10	1.97314e-09
ENSMUSG00000002496	Tsc2	22084	4781.74	-0.227227	0.0357417	-6.35748	2.05092e-10	2.0496e-09
ENSMUSG00000040253	Gbp7	229900	1924.95	-1.43615	0.226172	-6.34984	2.15538e-10	2.15273e-09
ENSMUSG00000079101	Esd-ps	100040682	353.354	0.74821	0.117842	6.34925	2.16371e-10	2.15978e-09
ENSMUSG00000029299	Abcg3	27405	388.396	-0.73786	0.116319	-6.3434	2.24746e-10	2.24206e-09
ENSMUSG00000004460	Dnajb11	67838	6335.19	0.242543	0.0382456	6.34171	2.27223e-10	2.26544e-09
ENSMUSG00000038335	Tsr1	104662	980.068	0.444745	0.0701324	6.34151	2.27529e-10	2.26717e-09
ENSMUSG00000041959	S100a10	20194	1194.09	0.54459	0.0858925	6.34036	2.29222e-10	2.2827e-09
ENSMUSG00000072946	Ptgr2	77219	3577.01	-0.279004	0.0440148	-6.33886	2.31473e-10	2.30377e-09
ENSMUSG00000038058	Nod1	107607	1086.56	-0.73194	0.115518	-6.33613	2.35605e-10	2.34353e-09
ENSMUSG00000001017	Chtop	66511	2862.1	0.344471	0.0543821	6.33428	2.38446e-10	2.3704e-09
ENSMUSG00000007815	Rhoa	11848	15669.6	0.33931	0.0536011	6.33028	2.44721e-10	2.43136e-09
ENSMUSG00000078921	Tgtp2	100039796	627.011	-2.026	0.3201	-6.32928	2.46308e-10	2.4457e-09
ENSMUSG00000038855	Itpkb	320404	3162.52	0.532419	0.0841487	6.32713	2.49766e-10	2.4786e-09
ENSMUSG00000052698	Tln2	70549	2531.16	-0.538897	0.0851758	-6.32687	2.50176e-10	2.48122e-09
ENSMUSG00000039759	Thap3	69876	364.684	-0.678273	0.107243	-6.32465	2.53808e-10	2.51577e-09
ENSMUSG00000038893	Fam117a	215512	231.622	-0.976882	0.154465	-6.3243	2.54384e-10	2.52002e-09
ENSMUSG00000029657	Hsph1	15505	1732.72	-0.452916	0.0717159	-6.31543	2.69414e-10	2.66736e-09
ENSMUSG00000030225	Dera	232449	2045.71	0.361031	0.0571726	6.31475	2.70603e-10	2.67757e-09
ENSMUSG00000059734	Ndufs8	225887	2078.1	0.312296	0.0494797	6.31161	2.76152e-10	2.72931e-09
ENSMUSG00000033033	Calhm2	72691	498.391	-0.618194	0.0979454	-6.31162	2.76121e-10	2.72931e-09
ENSMUSG00000074802	Gas2l3	237436	4132.76	0.396702	0.0628871	6.30816	2.82373e-10	2.78918e-09
ENSMUSG00000039899	Fgl2	14190	2407.94	-0.609042	0.0965741	-6.30647	2.85469e-10	2.81812e-09
ENSMUSG00000022614	Lmf2	105847	3716.89	-0.27278	0.0432554	-6.30627	2.85841e-10	2.82015e-09
ENSMUSG00000034795	Ccdc122	108811	135.97	1.15646	0.183447	6.30404	2.8998e-10	2.85933e-09
ENSMUSG00000041859	Mcm3	17215	2678.31	0.366115	0.0580787	6.30378	2.90481e-10	2.86096e-09
ENSMUSG00000029840	Mtpn	14489	24791.4	0.204201	0.032393	6.30386	2.90326e-10	2.86096e-09
ENSMUSG00000029204	Rhoh	74734	517.589	-0.632699	0.100406	-6.3014	2.94973e-10	2.90353e-09
ENSMUSG00000028278	Rragd	52187	2562.4	-0.523936	0.0831476	-6.30127	2.9521e-10	2.90418e-09
ENSMUSG00000000276	Dgke	56077	628.749	0.715312	0.113536	6.30032	2.97032e-10	2.92041e-09
ENSMUSG00000018474	Chd3	216848	1059.99	-0.502431	0.0797706	-6.29844	3.00647e-10	2.95425e-09
ENSMUSG00000045962	Wnk1	232341	4282.73	-0.603064	0.0957585	-6.29776	3.01982e-10	2.96566e-09
ENSMUSG00000038482	Tfdp1	21781	2827.61	0.362003	0.0574846	6.29738	3.02719e-10	2.97118e-09
ENSMUSG00000032666	1700025G04Rik	69399	631.884	-0.545435	0.0866405	-6.29539	3.06635e-10	3.00789e-09
ENSMUSG00000032280	Tle3	21887	1040.06	-0.507653	0.0806431	-6.29505	3.07293e-10	3.0126e-09
ENSMUSG00000018209	Stk4	58231	8041.53	-0.310872	0.049393	-6.29385	3.09692e-10	3.03437e-09
ENSMUSG00000068744	Psrc1	56742	142.594	-1.17173	0.186259	-6.29087	3.15695e-10	3.09141e-09
ENSMUSG00000021286	Zfyve21	68520	1528.23	-0.442731	0.0703968	-6.28907	3.19365e-10	3.12556e-09
ENSMUSG00000048232	Fbxo10	269529	595.156	-0.570781	0.0907744	-6.28791	3.21775e-10	3.14733e-09
ENSMUSG00000041890	Git2	26431	3421.14	-0.289111	0.0459868	-6.28682	3.24039e-10	3.16766e-09
ENSMUSG00000081999	Gm13461	625094	1791.78	0.407068	0.0647509	6.28668	3.24334e-10	3.16873e-09
ENSMUSG00000074916	Chst14	72136	1098.62	-0.386839	0.061583	-6.28159	3.35137e-10	3.27239e-09
ENSMUSG00000062082	Cd200r4	239849	3169.1	-0.271748	0.0432814	-6.27862	3.41594e-10	3.33161e-09
ENSMUSG00000038943	Prc1	233406	817.218	-0.67881	0.108127	-6.27789	3.43204e-10	3.3454e-09
ENSMUSG00000049103	Ccr2	12772	240.023	-0.803132	0.127937	-6.27755	3.43939e-10	3.35065e-09
ENSMUSG00000006442	Srm	20810	1228.44	0.487902	0.0777752	6.27324	3.53622e-10	3.44301e-09
ENSMUSG00000022364	Tbc1d31	210544	1193.09	-0.571083	0.0910427	-6.27269	3.54859e-10	3.45308e-09
ENSMUSG00000024544	Ldlrad4	52662	892.792	0.485748	0.077481	6.26926	3.62773e-10	3.52808e-09
ENSMUSG00000028896	Rcc1	100088	927.793	0.416507	0.0664425	6.26868	3.64126e-10	3.53922e-09
ENSMUSG00000052031	Tagap1	380608	1948.48	0.389779	0.0622005	6.26649	3.69265e-10	3.58712e-09
ENSMUSG00000061046	Haghl	68977	703.74	0.560873	0.0895294	6.26468	3.73596e-10	3.62712e-09
ENSMUSG00000002083	Bbc3	170770	664.316	-0.69329	0.110741	-6.26045	3.83866e-10	3.7247e-09
ENSMUSG00000031821	Gins2	272551	403.785	0.812029	0.129763	6.25778	3.90505e-10	3.78697e-09
ENSMUSG00000009293	Ube2g2	22213	3442.65	0.265556	0.0424525	6.25535	3.96614e-10	3.84402e-09
ENSMUSG00000050578	Mmp13	17386	911.504	0.770265	0.123165	6.25395	4.00192e-10	3.87649e-09
ENSMUSG00000034412	Tbc1d10a	103724	1527.39	0.418683	0.066955	6.2532	4.02135e-10	3.8931e-09
ENSMUSG00000017716	Birc5	11799	582.218	-0.61361	0.0982113	-6.24785	4.16136e-10	4.02635e-09
ENSMUSG00000030187	Klra2	16633	412.59	1.01541	0.162602	6.24474	4.24514e-10	4.10508e-09
ENSMUSG00000042121	Ssh1	231637	2855.26	-0.301264	0.0482512	-6.24366	4.2745e-10	4.13113e-09
ENSMUSG00000062210	Tnfaip8	106869	7441.58	-0.250111	0.0400655	-6.24256	4.30475e-10	4.158e-09
ENSMUSG00000075053	Vdac3-ps1	22336	2192.64	0.32247	0.0516577	6.24245	4.30776e-10	4.15855e-09
ENSMUSG00000066151	Fkbp15	338355	7490.07	-0.201601	0.0323015	-6.24124	4.3411e-10	4.18836e-09
ENSMUSG00000035529	Prdm4	72843	1976.6	0.47248	0.0757289	6.23909	4.40116e-10	4.2439e-09
ENSMUSG00000034744	Nagk	56174	3944.51	-0.254525	0.040804	-6.23776	4.43871e-10	4.27769e-09
ENSMUSG00000024317	Rnf138	56515	815.681	0.450846	0.0722792	6.23756	4.44451e-10	4.28085e-09
ENSMUSG00000034401	Spata6	67946	1921.57	0.389677	0.0624777	6.23705	4.45896e-10	4.29235e-09
ENSMUSG00000021276	Cinp	67236	1147.79	0.377969	0.060612	6.23588	4.49237e-10	4.32207e-09
ENSMUSG00000033628	Pik3c3	225326	1773.62	-0.393846	0.0631973	-6.232	4.60503e-10	4.42796e-09
ENSMUSG00000068039	Tcp1	21454	5698.75	0.29498	0.0473543	6.22921	4.68792e-10	4.50511e-09
ENSMUSG00000022742	Cpox	12892	987.614	-0.450942	0.0724036	-6.22817	4.71917e-10	4.53259e-09
ENSMUSG00000021408	Ripk1	19766	4179.41	-0.306792	0.0492645	-6.22745	4.74081e-10	4.54824e-09
ENSMUSG00000018417	Myo1b	17912	184.783	1.17963	0.189424	6.22747	4.74038e-10	4.54824e-09
ENSMUSG00000052384	Nrros	224109	14306.5	-0.217339	0.0349459	-6.21931	4.9934e-10	4.78787e-09
ENSMUSG00000029082	Bst1	12182	630.736	0.696325	0.111972	6.21875	5.0112e-10	4.80223e-09
ENSMUSG00000018412	Kansl1	76719	4858.16	-0.299487	0.0481994	-6.21349	5.18209e-10	4.96321e-09
ENSMUSG00000025766	D3Ertd751e	73852	319.463	-0.786292	0.126569	-6.21238	5.21897e-10	4.99572e-09
ENSMUSG00000027068	Dhrs9	241452	433.585	0.751995	0.12106	6.21175	5.23974e-10	5.01278e-09
ENSMUSG00000020482	Ccdc117	104479	1712.13	-0.416498	0.0670594	-6.21089	5.26867e-10	5.03763e-09
ENSMUSG00000005043	Sgsh	27029	2343.09	-0.440026	0.0708693	-6.20898	5.33304e-10	5.09632e-09
ENSMUSG00000067279	Ppp1r3c	53412	29.3082	-2.5004	0.402845	-6.20686	5.40539e-10	5.16255e-09
ENSMUSG00000023992	Trem2	83433	29114.4	-0.237965	0.0383845	-6.19951	5.66376e-10	5.40629e-09
ENSMUSG00000078974	Sec61g	20335	1359.45	0.481361	0.0776482	6.19926	5.67291e-10	5.41199e-09
ENSMUSG00000033671	Cep350	74081	2656.54	-0.648999	0.104755	-6.19542	5.8131e-10	5.54263e-09
ENSMUSG00000025487	Psmd13	23997	3829.48	0.290995	0.046989	6.19285	5.90873e-10	5.63065e-09
ENSMUSG00000010205	Raver1	71766	2426.83	0.313654	0.050649	6.19269	5.9146e-10	5.63309e-09
ENSMUSG00000037876	Jmjd1c	108829	3616.74	-0.542498	0.0876243	-6.19118	5.97137e-10	5.68399e-09
ENSMUSG00000047643	Gm5454	432800	576.359	0.544726	0.0879982	6.1902	6.00885e-10	5.71646e-09
ENSMUSG00000032115	Hyou1	12282	3468.99	0.272109	0.0439606	6.18984	6.02241e-10	5.72616e-09
ENSMUSG00000034612	Chst11	58250	425.098	1.01109	0.163493	6.18432	6.23704e-10	5.92693e-09
ENSMUSG00000096403	Gm9825	100040661	2485.88	0.305521	0.0494307	6.18079	6.37815e-10	6.05764e-09
ENSMUSG00000063412	Gm10131	100042777	1905.88	0.319026	0.051636	6.17836	6.47719e-10	6.14485e-09
ENSMUSG00000028165	Cisd2	67006	2979.43	0.326134	0.0527861	6.1784	6.47534e-10	6.14485e-09
ENSMUSG00000070524	Fcrlb	435653	172.349	1.03903	0.168179	6.17812	6.48681e-10	6.15055e-09
ENSMUSG00000055538	Zcchc24	71918	2665.18	-0.300952	0.0487251	-6.17653	6.55263e-10	6.2095e-09
ENSMUSG00000052459	Atp6v1a	11964	29246.2	-0.287631	0.0466165	-6.17015	6.8226e-10	6.46174e-09
ENSMUSG00000022799	Arhgap31	12549	6117.47	0.450841	0.0731351	6.16449	7.07088e-10	6.69316e-09
ENSMUSG00000024528	Srfbp1	67222	791.54	0.489154	0.0794163	6.15937	7.30348e-10	6.9095e-09
ENSMUSG00000055612	Cdca7	66953	243.414	1.01431	0.164759	6.15635	7.44393e-10	7.03846e-09
ENSMUSG00000031904	Slc7a6	330836	661.72	0.602947	0.097951	6.1556	7.47931e-10	7.06746e-09
ENSMUSG00000032245	Cln6	76524	1404.02	-0.381647	0.0620007	-6.15553	7.4829e-10	7.06746e-09
ENSMUSG00000021244	Ylpm1	56531	1316.68	-0.626407	0.101807	-6.15288	7.60862e-10	7.18222e-09
ENSMUSG00000026020	Nop58	55989	1298.61	0.428005	0.0695701	6.15215	7.64406e-10	7.21167e-09
ENSMUSG00000024659	Anxa1	16952	7777.64	0.285414	0.0464152	6.14914	7.79052e-10	7.34578e-09
ENSMUSG00000047747	Rnf150	330812	792.53	-0.545125	0.0887286	-6.14374	8.06031e-10	7.59176e-09
ENSMUSG00000043241	Upf2	326622	902.985	-0.5734	0.0933308	-6.14374	8.06024e-10	7.59176e-09
ENSMUSG00000027533	Fabp5	16592	18135	-0.251593	0.0409578	-6.14274	8.11092e-10	7.6352e-09
ENSMUSG00000027330	Cdc25b	12531	757.307	-0.613886	0.100009	-6.13829	8.34139e-10	7.84782e-09
ENSMUSG00000020101	Vsir	74048	14167.3	-0.348022	0.0567188	-6.13593	8.46631e-10	7.96095e-09
ENSMUSG00000022684	Bfar	67118	1979.35	-0.352297	0.0575242	-6.12434	9.10626e-10	8.55798e-09
ENSMUSG00000055652	Klhl25	207952	1321.38	0.452894	0.0739913	6.12092	9.30387e-10	8.73887e-09
ENSMUSG00000036644	Tbc1d9b	76795	8808.74	-0.266949	0.0436195	-6.11995	9.36069e-10	8.78739e-09
ENSMUSG00000028436	Dcaf12	68970	5562.58	-0.219168	0.0358141	-6.1196	9.38134e-10	8.80192e-09
ENSMUSG00000034349	Smc4	70099	1416.77	-0.432482	0.0707216	-6.11527	9.6392e-10	9.03888e-09
ENSMUSG00000005886	Ncoa2	17978	2632.48	-0.422515	0.0691023	-6.11433	9.69628e-10	9.0874e-09
ENSMUSG00000032397	Tipin	66131	707	0.501373	0.0820102	6.11355	9.74412e-10	9.12721e-09
ENSMUSG00000022797	Tfrc	22042	10785.2	-0.38095	0.0624573	-6.09937	1.06486e-09	9.96893e-09
ENSMUSG00000037072	Selenof	93684	12084	0.186462	0.0305857	6.0964	1.08485e-09	1.0145e-08
ENSMUSG00000029304	Spp1	20750	644179	0.319251	0.0523838	6.09445	1.09815e-09	1.02637e-08
ENSMUSG00000056592	Zfp658	210104	482.586	0.694635	0.113994	6.0936	1.104e-09	1.03127e-08
ENSMUSG00000038179	Slamf7	75345	294.717	-1.02813	0.168755	-6.09245	1.11194e-09	1.03812e-08
ENSMUSG00000032513	Gorasp1	74498	1402.97	-0.362366	0.059506	-6.08957	1.13213e-09	1.0558e-08
ENSMUSG00000026641	Usf1	22278	1820.57	-0.376635	0.0618489	-6.0896	1.13196e-09	1.0558e-08
ENSMUSG00000026600	Soat1	20652	23274.1	-0.239787	0.0393905	-6.08742	1.14745e-09	1.06951e-08
ENSMUSG00000001018	Snapin	20615	3478.58	0.257515	0.0423049	6.08712	1.14962e-09	1.07094e-08
ENSMUSG00000055670	Zzef1	195018	2388.79	-0.575682	0.094579	-6.08678	1.15203e-09	1.0726e-08
ENSMUSG00000021120	Pigh	110417	426.228	-0.688587	0.113138	-6.08628	1.15567e-09	1.07541e-08
ENSMUSG00000002210	Smg9	71997	1268.86	0.463879	0.0762183	6.08618	1.15637e-09	1.07546e-08
ENSMUSG00000034663	Bmp2k	140780	6055.77	0.24698	0.0405822	6.08593	1.15819e-09	1.07645e-08
ENSMUSG00000028779	Pef1	67898	2443.19	0.350347	0.0575674	6.08586	1.15869e-09	1.07645e-08
ENSMUSG00000029131	Dnajb6	23950	6022.08	0.337094	0.0554622	6.07792	1.21755e-09	1.13052e-08
ENSMUSG00000040322	Slc25a24	229731	2350.59	0.331941	0.0546501	6.07394	1.24809e-09	1.15824e-08
ENSMUSG00000021880	Rnase6	78416	169.484	-0.988616	0.162838	-6.07118	1.26974e-09	1.17769e-08
ENSMUSG00000049119	Fam110b	242297	465.296	-0.687162	0.113186	-6.07108	1.27054e-09	1.17779e-08
ENSMUSG00000022801	Lrch3	70144	3160.81	-0.35625	0.058758	-6.063	1.33603e-09	1.23782e-08
ENSMUSG00000070942	Il1rl2	107527	603.6	0.626421	0.103404	6.05801	1.37819e-09	1.27619e-08
ENSMUSG00000057778	Cyb5d2	192986	612.682	-0.529791	0.0874972	-6.05495	1.40465e-09	1.29999e-08
ENSMUSG00000035891	Cerk	223753	15640.8	-0.313442	0.0517725	-6.05422	1.41098e-09	1.30514e-08
ENSMUSG00000046546	Fam43a	224093	339.742	-0.717769	0.118612	-6.05141	1.43586e-09	1.32743e-08
ENSMUSG00000070737	Tmem35b	100039968	929.625	-0.445289	0.073592	-6.05077	1.44151e-09	1.33193e-08
ENSMUSG00000033540	Idua	15932	3881.51	-0.268911	0.0444485	-6.04995	1.44887e-09	1.338e-08
ENSMUSG00000017677	Wsb1	78889	7437.18	0.227813	0.0376657	6.04828	1.46404e-09	1.35128e-08
ENSMUSG00000036473	Tbc1d24	224617	1592.35	-0.394275	0.0652211	-6.04521	1.49213e-09	1.37646e-08
ENSMUSG00000012640	Zfp715	69930	2339.5	-0.313881	0.0519325	-6.04401	1.5033e-09	1.38601e-08
ENSMUSG00000019188	H13	14950	3037.72	0.276239	0.0457106	6.04322	1.51066e-09	1.39204e-08
ENSMUSG00000033488	Cryzl2	226527	565.229	0.534604	0.0884905	6.04138	1.52802e-09	1.40728e-08
ENSMUSG00000033918	Parl	381038	1831.08	0.364373	0.0603985	6.03281	1.61129e-09	1.48317e-08
ENSMUSG00000005686	Ampd3	11717	7379.99	0.270846	0.0449112	6.03069	1.63261e-09	1.50198e-08
ENSMUSG00000030753	Thap12	72981	1368.56	0.389044	0.0645199	6.02983	1.64137e-09	1.50915e-08
ENSMUSG00000036438	Calm2	12314	19341.9	-0.243091	0.0403153	-6.02975	1.64217e-09	1.50915e-08
ENSMUSG00000041231	Ublcp1	79560	840.241	0.515205	0.0855139	6.02482	1.69302e-09	1.5542e-08
ENSMUSG00000020721	Helz	78455	2104.25	-0.632966	0.105059	-6.02483	1.69285e-09	1.5542e-08
ENSMUSG00000014195	Dnajc7	56354	3172.81	-0.248153	0.041218	-6.02051	1.73872e-09	1.5953e-08
ENSMUSG00000032565	Nudt16	75686	1121.17	-0.436656	0.0725346	-6.01998	1.74441e-09	1.59965e-08
ENSMUSG00000001175	Calm1	12313	34540.4	0.251671	0.0418205	6.01787	1.76724e-09	1.61971e-08
ENSMUSG00000024732	Ccdc86	108673	2325.39	0.595783	0.099047	6.01516	1.79712e-09	1.64621e-08
ENSMUSG00000022905	Kpna1	16646	6804.73	0.332314	0.055265	6.0131	1.82004e-09	1.66631e-08
ENSMUSG00000034994	Eef2	13629	22535.9	-0.235405	0.0391663	-6.01039	1.8508e-09	1.69357e-08
ENSMUSG00000051682	Treml4	224840	125.444	1.84218	0.30659	6.00863	1.87102e-09	1.71115e-08
ENSMUSG00000019579	Mydgf	28106	2817.39	0.334138	0.055617	6.00784	1.88008e-09	1.71827e-08
ENSMUSG00000030603	Psmc4	23996	3917.47	0.276695	0.0460561	6.00778	1.88082e-09	1.71827e-08
ENSMUSG00000024986	Hhex	15242	1750.86	-0.315918	0.0525971	-6.00638	1.89716e-09	1.73226e-08
ENSMUSG00000066152	Slc31a2	20530	9928.52	0.355994	0.0592708	6.00623	1.89884e-09	1.73287e-08
ENSMUSG00000025880	Smad7	17131	232.03	0.826568	0.137695	6.00289	1.93832e-09	1.76795e-08
ENSMUSG00000082838	Gm14519	628627	145.686	1.02046	0.170153	5.99727	2.00663e-09	1.8283e-08
ENSMUSG00000026994	Galnt3	14425	140.724	0.964733	0.161	5.99213	2.07117e-09	1.88609e-08
ENSMUSG00000032497	Lrrfip2	71268	2551.64	0.397559	0.0663832	5.98885	2.11324e-09	1.92235e-08
ENSMUSG00000052889	Prkcb	18751	12449.2	-0.257139	0.0429381	-5.98859	2.11667e-09	1.92444e-08
ENSMUSG00000019210	Atp6v1e1	11973	11729.2	0.210893	0.0352335	5.98559	2.1561e-09	1.95924e-08
ENSMUSG00000025016	Tm9sf3	107358	27449.9	0.210499	0.0351801	5.98348	2.18419e-09	1.98371e-08
ENSMUSG00000083327	Vcp-rs	236937	12532	0.199034	0.0332988	5.97723	2.26968e-09	2.06026e-08
ENSMUSG00000050106	Tmc8	217356	118.257	1.21225	0.202874	5.97537	2.29565e-09	2.08272e-08
ENSMUSG00000020375	Rufy1	216724	2518.91	-0.288945	0.0483856	-5.9717	2.34788e-09	2.12897e-08
ENSMUSG00000097145	9230114K14Rik	414108	62.4977	-1.539	0.257722	-5.97155	2.35003e-09	2.12979e-08
ENSMUSG00000013701	Timm23	53600	3930.06	0.296873	0.0497298	5.96971	2.37671e-09	2.15282e-08
ENSMUSG00000047187	Rab2a	59021	10509.4	0.231776	0.0388306	5.9689	2.38853e-09	2.16238e-08
ENSMUSG00000024766	Lipo3	381236	2083.32	0.322418	0.0540182	5.9687	2.39147e-09	2.16389e-08
ENSMUSG00000001151	Pcnt	18541	1196.85	-0.563875	0.0944802	-5.96818	2.39909e-09	2.16963e-08
ENSMUSG00000063904	Dpp3	75221	5516.53	0.225335	0.0377588	5.96776	2.40536e-09	2.17415e-08
ENSMUSG00000037486	Asxl2	75302	2018.03	-0.427725	0.0716749	-5.96757	2.40812e-09	2.17548e-08
ENSMUSG00000036087	Slain2	75991	2845.69	0.253329	0.0424616	5.96607	2.43034e-09	2.1944e-08
ENSMUSG00000034591	Slc41a2	338365	2096.03	0.365835	0.061323	5.96571	2.43573e-09	2.19809e-08
ENSMUSG00000026470	Stx6	58244	3724.6	0.28768	0.0482235	5.96555	2.43818e-09	2.19914e-08
ENSMUSG00000079224	Gm6565	100503412	646.722	0.484667	0.0812617	5.96427	2.45728e-09	2.21519e-08
ENSMUSG00000028452	Vcp	269523	21418.8	0.199757	0.0334949	5.96381	2.46425e-09	2.2203e-08
ENSMUSG00000018770	Atp5g3	228033	5390.38	0.234256	0.0392808	5.96363	2.46692e-09	2.22153e-08
ENSMUSG00000029007	Agtrap	11610	2918.83	0.307874	0.0516397	5.96195	2.49244e-09	2.24333e-08
ENSMUSG00000030759	Far1	67420	4842.98	-0.278148	0.0466584	-5.96138	2.50123e-09	2.25005e-08
ENSMUSG00000027195	Hsd17b12	56348	5280.41	0.297084	0.049853	5.95919	2.53485e-09	2.27909e-08
ENSMUSG00000027284	Cdan1	68968	623.229	-0.566462	0.0950666	-5.95858	2.54441e-09	2.28648e-08
ENSMUSG00000070858	Gm1673	381633	764.352	-0.572158	0.0960316	-5.95802	2.55305e-09	2.29304e-08
ENSMUSG00000026177	Slc11a1	18173	33192.8	0.208413	0.0349866	5.95694	2.56997e-09	2.30702e-08
ENSMUSG00000021972	Hmbox1	219150	1021.78	-0.46738	0.078477	-5.95563	2.59076e-09	2.32445e-08
ENSMUSG00000051379	Flrt3	71436	41.0958	3.07873	0.516982	5.9552	2.59752e-09	2.32929e-08
ENSMUSG00000008429	Herpud2	80517	4153.48	-0.215748	0.0362321	-5.95461	2.60691e-09	2.33648e-08
ENSMUSG00000018565	Elp5	54351	1939.33	0.352318	0.0591873	5.9526	2.63911e-09	2.3641e-08
ENSMUSG00000030298	Sec13	110379	3631.45	0.284344	0.0477739	5.95187	2.65102e-09	2.37351e-08
ENSMUSG00000070436	Serpinh1	12406	367.344	-1.11531	0.187398	-5.95157	2.6559e-09	2.37663e-08
ENSMUSG00000037126	Psd	73728	235.964	1.13422	0.190631	5.9498	2.68474e-09	2.40118e-08
ENSMUSG00000050350	Gpr18	110168	122.855	1.59349	0.267907	5.94791	2.71585e-09	2.42645e-08
ENSMUSG00000058706	0610030E20Rik	68364	1093.56	-0.427999	0.0719573	-5.94796	2.71499e-09	2.42645e-08
ENSMUSG00000020075	Ddx21	56200	1512.2	0.460769	0.0774782	5.94708	2.72965e-09	2.4375e-08
ENSMUSG00000005774	Rfx5	53970	458.016	0.625399	0.105179	5.94603	2.74718e-09	2.45187e-08
ENSMUSG00000027469	Tpx2	72119	810.646	-0.497747	0.0837473	-5.94344	2.79109e-09	2.48976e-08
ENSMUSG00000001995	Sipa1l2	244668	3730.76	0.436454	0.0734797	5.9398	2.85376e-09	2.54433e-08
ENSMUSG00000005251	Ripk4	72388	149.492	-1.14017	0.191984	-5.9389	2.86934e-09	2.55688e-08
ENSMUSG00000020085	Aifm2	71361	1751.3	0.408697	0.0688335	5.93747	2.89454e-09	2.57799e-08
ENSMUSG00000017664	Slc35c2	228875	3469.27	-0.303414	0.0511323	-5.9339	2.95815e-09	2.63327e-08
ENSMUSG00000057858	Fam204a	76539	477.143	0.535637	0.0902995	5.93179	2.99655e-09	2.66605e-08
ENSMUSG00000086763	Plxna4os1	319849	998.326	-0.441524	0.0744375	-5.93148	3.00219e-09	2.66967e-08
ENSMUSG00000035835	Plppr3	216152	797.26	-0.494829	0.083444	-5.93007	3.02812e-09	2.6902e-08
ENSMUSG00000095595	Fam177a	73385	1829.88	0.38597	0.0650872	5.93005	3.02843e-09	2.6902e-08
ENSMUSG00000038564	Ift172	67661	1482.92	-0.505394	0.0852443	-5.92877	3.05204e-09	2.70976e-08
ENSMUSG00000071547	Nt5dc2	70021	4817.27	-0.27729	0.0467936	-5.92582	3.1075e-09	2.75756e-08
ENSMUSG00000017760	Ctsa	19025	93934.5	-0.17552	0.0296292	-5.9239	3.144e-09	2.7885e-08
ENSMUSG00000024789	Jak2	16452	3292.71	0.337829	0.0570327	5.92341	3.15325e-09	2.79525e-08
ENSMUSG00000029475	Kdm2b	30841	2217.81	-0.296858	0.0501318	-5.92155	3.18922e-09	2.82566e-08
ENSMUSG00000042644	Itpr3	16440	1841.84	0.432441	0.0730557	5.91934	3.23245e-09	2.86248e-08
ENSMUSG00000073700	Klhl21	242785	2432.64	-0.310721	0.0525044	-5.91799	3.25897e-09	2.88296e-08
ENSMUSG00000038508	Gdf15	23886	239.858	0.915238	0.154653	5.91801	3.25858e-09	2.88296e-08
ENSMUSG00000000149	Gna12	14673	21872.5	-0.247236	0.0417858	-5.91674	3.2839e-09	2.90351e-08
ENSMUSG00000039745	Htatip2	53415	2514.95	0.28967	0.0489673	5.91558	3.30713e-09	2.92253e-08
ENSMUSG00000037224	Zfyve28	231125	248.601	-0.761421	0.128754	-5.91379	3.3433e-09	2.95296e-08
ENSMUSG00000021361	Tmem14c	66154	4420.76	0.230458	0.038982	5.91191	3.38171e-09	2.98534e-08
ENSMUSG00000035914	Cd276	102657	138.701	1.07972	0.182659	5.91112	3.39789e-09	2.99807e-08
ENSMUSG00000039220	Ppp1r10	52040	2186.24	0.368108	0.0623175	5.90698	3.48434e-09	3.07275e-08
ENSMUSG00000040158	Tax1bp3	76281	2463.86	0.292184	0.0494724	5.906	3.50512e-09	3.08947e-08
ENSMUSG00000004462	Tbccd1	70573	1254.22	-0.403328	0.0683649	-5.89964	3.64301e-09	3.20935e-08
ENSMUSG00000016946	Kctd5	69259	1515.38	0.349314	0.0592144	5.89915	3.65389e-09	3.21728e-08
ENSMUSG00000033898	Cfhr2	545366	599.209	-0.493943	0.0837923	-5.89485	3.75028e-09	3.30044e-08
ENSMUSG00000015202	Cnksr3	215748	624.511	-0.580511	0.0984934	-5.89391	3.77165e-09	3.31753e-08
ENSMUSG00000072421	Gm10357	102640615	222.734	0.835602	0.141843	5.89105	3.83752e-09	3.37373e-08
ENSMUSG00000058050	Gm9234	668548	4189.39	0.301084	0.0511141	5.89043	3.85193e-09	3.38465e-08
ENSMUSG00000052917	Senp7	66315	670.474	-0.565014	0.0959391	-5.8893	3.87833e-09	3.40609e-08
ENSMUSG00000080845	Gm9115	668343	58.6357	1.65458	0.281443	5.87891	4.12979e-09	3.62506e-08
ENSMUSG00000037234	Hook3	320191	3156.65	-0.321716	0.0547335	-5.87787	4.15588e-09	3.64233e-08
ENSMUSG00000028136	Snx27	76742	4975	-0.369102	0.0627949	-5.87789	4.15525e-09	3.64233e-08
ENSMUSG00000052911	Lamb2	16779	2635.37	-0.428352	0.0728733	-5.87803	4.15166e-09	3.64233e-08
ENSMUSG00000070639	Lrrc8b	433926	520.227	0.740623	0.126042	5.876	4.20311e-09	3.68183e-08
ENSMUSG00000044167	Foxo1	56458	761.472	-0.527667	0.0898179	-5.87485	4.23227e-09	3.70547e-08
ENSMUSG00000007880	Arid1a	93760	2620.82	-0.532745	0.0906869	-5.87455	4.24005e-09	3.71037e-08
ENSMUSG00000021957	Tkt	21881	10288.2	0.25336	0.0431375	5.87331	4.27174e-09	3.73426e-08
ENSMUSG00000022973	Synj1	104015	4766.54	-0.407995	0.0694739	-5.87264	4.28919e-09	3.74759e-08
ENSMUSG00000094526	Gm21451	100862072	82.2884	-1.44192	0.245733	-5.86782	4.4156e-09	3.85606e-08
ENSMUSG00000033159	Cnppd1	69171	3678.08	-0.272709	0.0464823	-5.86694	4.43911e-09	3.87461e-08
ENSMUSG00000042207	Kdm5b	75605	2670.67	-0.265373	0.0452418	-5.86567	4.47319e-09	3.90236e-08
ENSMUSG00000068335	Dok1	13448	1800	-0.312486	0.0532858	-5.86435	4.50901e-09	3.93159e-08
ENSMUSG00000004270	Lpcat3	14792	3500.04	0.245748	0.0419088	5.86388	4.52165e-09	3.9406e-08
ENSMUSG00000035877	Zhx3	320799	635.272	-0.600666	0.10244	-5.86359	4.5297e-09	3.94559e-08
ENSMUSG00000051413	Plagl2	54711	3711.88	0.339595	0.0579257	5.86259	4.55691e-09	3.96726e-08
ENSMUSG00000041057	Wdr43	72515	2313.81	0.343976	0.0586805	5.86186	4.57723e-09	3.98292e-08
ENSMUSG00000060791	Gmfg	63986	1618.97	0.42686	0.072871	5.85775	4.69194e-09	4.08064e-08
ENSMUSG00000047514	Tspyl1	22110	5200.87	-0.263465	0.0449843	-5.85682	4.71802e-09	4.10123e-08
ENSMUSG00000021629	Slc30a5	69048	5712.78	-0.264411	0.045147	-5.85666	4.72259e-09	4.10311e-08
ENSMUSG00000028719	Cmpk1	66588	7594.82	0.212304	0.0362581	5.85536	4.75976e-09	4.13329e-08
ENSMUSG00000039633	Lonrf1	244421	554.226	0.819067	0.139969	5.85177	4.86363e-09	4.22134e-08
ENSMUSG00000079084	Ccdc82	66396	695.209	-0.495917	0.0847659	-5.85042	4.90322e-09	4.25354e-08
ENSMUSG00000035051	Dhx57	106794	1550.7	-0.435699	0.0744742	-5.85033	4.90594e-09	4.25373e-08
ENSMUSG00000034601	2700049A03Rik	76967	544.638	-0.590538	0.10096	-5.84921	4.9392e-09	4.28039e-08
ENSMUSG00000048027	Rgmb	68799	1895.13	-0.341145	0.0583506	-5.84646	5.02131e-09	4.34933e-08
ENSMUSG00000029538	Srsf9	108014	4096.16	0.260896	0.0446671	5.84088	5.19243e-09	4.49526e-08
ENSMUSG00000056608	Chd9	109151	1741.81	-0.393191	0.0673933	-5.83428	5.40246e-09	4.67472e-08
ENSMUSG00000091383	Hist1h2al	667728	227.035	0.763158	0.130906	5.82982	5.54873e-09	4.79885e-08
ENSMUSG00000045455	Gm9797	100039343	510.77	0.515573	0.088442	5.8295	5.55944e-09	4.80567e-08
ENSMUSG00000036086	Zranb3	226409	1291.43	0.529649	0.090874	5.82838	5.59668e-09	4.83541e-08
ENSMUSG00000027435	Cd93	17064	10302.6	-0.4733	0.0812134	-5.82786	5.61418e-09	4.84807e-08
ENSMUSG00000036989	Trim3	55992	1496.34	-0.364406	0.0625315	-5.82757	5.62404e-09	4.85412e-08
ENSMUSG00000034438	Gbp8	76074	102.073	-1.99705	0.342757	-5.82645	5.66193e-09	4.88435e-08
ENSMUSG00000040084	Bub1b	12236	748.556	-0.520139	0.0892766	-5.82616	5.67179e-09	4.89038e-08
ENSMUSG00000027132	Katnbl1	72425	2204.9	0.38777	0.0665972	5.82261	5.79363e-09	4.9929e-08
ENSMUSG00000029036	Atad3a	108888	1742.39	0.35304	0.0606865	5.81744	5.97563e-09	5.14714e-08
ENSMUSG00000040918	Slc19a2	116914	883.741	-0.442688	0.0761278	-5.81506	6.06112e-09	5.21814e-08
ENSMUSG00000026766	Mmadhc	109129	2079.07	0.285639	0.0491387	5.81292	6.13926e-09	5.28274e-08
ENSMUSG00000079067	Hmgn2-ps1	100039489	270.748	0.793132	0.136485	5.81113	6.20521e-09	5.3368e-08
ENSMUSG00000028163	Nfkb1	18033	3215.38	0.388415	0.0668562	5.8097	6.25842e-09	5.37984e-08
ENSMUSG00000024429	Gnl1	14670	2072.53	0.298362	0.051389	5.80595	6.40026e-09	5.49899e-08
ENSMUSG00000037552	Plekhg2	101497	399.717	0.676422	0.116557	5.80336	6.49994e-09	5.58182e-08
ENSMUSG00000024219	Anks1	224650	3148.64	-0.30534	0.0526302	-5.8016	6.56832e-09	5.63769e-08
ENSMUSG00000021288	Klc1	16593	2837.41	-0.302218	0.0520932	-5.80148	6.5732e-09	5.63905e-08
ENSMUSG00000054604	Cggbp1	106143	7517.57	0.206539	0.0356147	5.79927	6.66057e-09	5.71112e-08
ENSMUSG00000021832	Psmc6	67089	3576.56	0.269269	0.0464623	5.79544	6.81406e-09	5.83979e-08
ENSMUSG00000086316	Nbdy	70123	946.235	-0.442518	0.0763739	-5.7941	6.86888e-09	5.88381e-08
ENSMUSG00000026698	Pigc	67292	1200.5	-0.416423	0.0718896	-5.79253	6.93326e-09	5.93597e-08
ENSMUSG00000041084	Ostc	66357	3725.64	0.240769	0.0415784	5.79073	7.00815e-09	5.99707e-08
ENSMUSG00000031709	Tbc1d9	71310	2380.18	0.524338	0.0906094	5.7868	7.17401e-09	6.13592e-08
ENSMUSG00000039168	Dap	223453	3312.04	0.259142	0.044787	5.78611	7.20357e-09	6.15811e-08
ENSMUSG00000058254	Tspan7	21912	616.393	-0.63401	0.109581	-5.78575	7.21879e-09	6.16803e-08
ENSMUSG00000027164	Traf6	22034	2891.9	0.351948	0.0608449	5.78434	7.27963e-09	6.21689e-08
ENSMUSG00000025911	Adhfe1	76187	370.651	0.836331	0.144637	5.78228	7.36949e-09	6.29048e-08
ENSMUSG00000036875	Dna2	327762	602.892	0.624445	0.107996	5.78211	7.37675e-09	6.29352e-08
ENSMUSG00000034353	Ramp1	51801	257.35	-0.714205	0.123531	-5.78156	7.40094e-09	6.31099e-08
ENSMUSG00000032301	Psma4	26441	3801.07	0.270816	0.0468491	5.7806	7.44337e-09	6.344e-08
ENSMUSG00000060992	Copz1	56447	6590.3	0.241099	0.0417103	5.78034	7.45504e-09	6.35077e-08
ENSMUSG00000030041	M1ap	110958	153.353	-0.977819	0.169229	-5.77807	7.55625e-09	6.43377e-08
ENSMUSG00000008305	Tle1	21885	635.028	-0.469868	0.0813402	-5.77658	7.62353e-09	6.48781e-08
ENSMUSG00000033272	Slc35a4	67843	5852.26	0.231189	0.0400325	5.77503	7.69376e-09	6.54431e-08
ENSMUSG00000037514	Pank2	74450	2403.27	-0.294977	0.0510897	-5.7737	7.75505e-09	6.59315e-08
ENSMUSG00000062588	Gm6104	619829	62.0739	1.43995	0.249512	5.77107	7.87718e-09	6.69364e-08
ENSMUSG00000024101	Washc1	68767	758.235	-0.414258	0.071805	-5.76921	7.96432e-09	6.76431e-08
ENSMUSG00000063535	Zfp773	76373	173.185	-0.998356	0.17309	-5.76783	8.02968e-09	6.81642e-08
ENSMUSG00000063972	Nr6a1	14536	137.217	-1.34921	0.234039	-5.76489	8.17092e-09	6.93286e-08
ENSMUSG00000023150	Ivns1abp	117198	6781.79	0.248041	0.0430381	5.7633	8.24861e-09	6.99181e-08
ENSMUSG00000000776	Polr3d	67065	546.489	0.713127	0.123774	5.76153	8.33571e-09	7.06213e-08
ENSMUSG00000038178	Slc43a2	215113	19331	0.268984	0.0467171	5.75772	8.52578e-09	7.21956e-08
ENSMUSG00000018585	Atox1	11927	5009.32	0.359968	0.0625339	5.75636	8.59474e-09	7.27435e-08
ENSMUSG00000032855	Pkd1	18763	3269.45	-0.526631	0.091496	-5.75578	8.62431e-09	7.29575e-08
ENSMUSG00000026223	Itm2c	64294	21768.3	-0.188973	0.0328329	-5.7556	8.63352e-09	7.29991e-08
ENSMUSG00000071379	Hpcal1	53602	2814.93	-0.270489	0.0470119	-5.75363	8.73458e-09	7.38169e-08
ENSMUSG00000039463	Slc9a8	77031	1661.53	0.374917	0.065176	5.75238	8.79949e-09	7.43286e-08
ENSMUSG00000030341	Tnfrsf1a	21937	5850.89	-0.218753	0.038055	-5.74836	9.01149e-09	7.60763e-08
ENSMUSG00000015846	Rxra	20181	7886.3	-0.277685	0.0483074	-5.74828	9.01533e-09	7.60763e-08
ENSMUSG00000030096	Slc6a6	21366	34866	-0.225275	0.0392017	-5.74656	9.10795e-09	7.68199e-08
ENSMUSG00000003444	Med29	67224	698.399	0.471899	0.0821387	5.74515	9.18382e-09	7.74214e-08
ENSMUSG00000032413	Rasa2	114713	1010.94	0.427658	0.0744641	5.74314	9.29366e-09	7.82699e-08
ENSMUSG00000003437	Paf1	54624	1942.54	0.341522	0.059481	5.7417	9.3729e-09	7.88982e-08
ENSMUSG00000058355	Abce1	24015	5078.7	0.263869	0.045969	5.74014	9.45966e-09	7.95878e-08
ENSMUSG00000048277	Syngr2	20973	6920.86	0.213465	0.0371887	5.74006	9.46416e-09	7.95878e-08
ENSMUSG00000021275	Tecpr2	104859	938.837	-0.442874	0.0771601	-5.73968	9.48576e-09	7.973e-08
ENSMUSG00000040998	Npnt	114249	165.239	0.919335	0.160255	5.73669	9.65436e-09	8.11071e-08
ENSMUSG00000036622	Atp13a2	74772	21840	-0.231616	0.0403854	-5.73514	9.74297e-09	8.18112e-08
ENSMUSG00000079426	Arpc4	68089	11395.6	0.243335	0.0424351	5.73428	9.79272e-09	8.21884e-08
ENSMUSG00000040532	Abhd11	68758	421.437	0.539204	0.0940438	5.73354	9.83548e-09	8.25066e-08
ENSMUSG00000021500	Ddx46	212880	2350.7	0.328006	0.0572221	5.73216	9.91578e-09	8.31393e-08
[truncated: 30,572 more rows]
