# Supplementary material for: Microglia show differential transcriptomic response to Aβ peptide aggregates ex vivo and in vivo
Source: Life Sci Alliance. 2021 Jun 14;4(7):e202101108. doi: 10.26508/lsa.202101108 (PMC8321667; doi:10.26508/lsa.202101108)
Supplement: Supplementary file 5 [file LSA-2021-01108_TableS5.xlsx]

## Sheet: Sheet1
category	pathway_name	over_represented_pvalue	BHadjust	numDEInCat	numInCat	totalDEG	totalNum	enrichment
4512	ECM-receptor interaction	6.39488e-08	1.43885e-05	17	86	1067	6309	1.16882
