# Supplementary material for: Microglia show differential transcriptomic response to Aβ peptide aggregates ex vivo and in vivo
Source: Life Sci Alliance. 2021 Jun 14;4(7):e202101108. doi: 10.26508/lsa.202101108 (PMC8321667; doi:10.26508/lsa.202101108)
Supplement: Supplementary file 8 [file LSA-2021-01108_TableS8.xlsx]

## Sheet: Sheet1
category	ontology	term	over_represented_pvalue	BHadjust	numDEInCat	numInCat	totalDEG	totalNum	enrichment
GO:0031994	MF	insulin-like growth factor I binding	0.000174162	0.0119391	7	12	2149	21152	5.74159
GO:0003777	MF	microtubule motor activity	1.93579e-05	0.00209261	26	81	2149	21152	3.15939
GO:0008017	MF	microtubule binding	3.43711e-09	1.45984e-06	61	237	2149	21152	2.53336
GO:0003774	MF	motor activity	0.000555324	0.0292423	32	130	2149	21152	2.42282
GO:0005088	MF	Ras guanyl-nucleotide exchange factor activity	0.000864334	0.0416157	31	127	2149	21152	2.40255
GO:0005178	MF	integrin binding	9.02343e-05	0.00716932	29	122	2149	21152	2.33966
GO:0005539	MF	glycosaminoglycan binding	2.72231e-06	0.000417347	43	201	2149	21152	2.10566
GO:0015631	MF	tubulin binding	1.03307e-07	2.60149e-05	71	333	2149	21152	2.0986
GO:0008201	MF	heparin binding	8.13982e-05	0.00672882	31	148	2149	21152	2.06165
GO:0005096	MF	GTPase activator activity	0.000320515	0.0193655	49	237	2149	21152	2.03499
GO:0140375	MF	immune receptor activity	0.000395895	0.0225359	23	112	2149	21152	2.02127
GO:0030695	MF	GTPase regulator activity	0.000422321	0.0236805	51	255	2149	21152	1.96854
GO:1901681	MF	sulfur compound binding	0.000191288	0.0128392	42	241	2149	21152	1.71533
GO:0001217	MF	DNA-binding transcription repressor activity	0.000797775	0.0387429	41	238	2149	21152	1.69559
GO:0001227	MF	DNA-binding transcription repressor activity, RNA polymerase II-specific	0.000797775	0.0387429	41	238	2149	21152	1.69559
GO:0008092	MF	cytoskeletal protein binding	4.05625e-07	7.79528e-05	161	959	2149	21152	1.65243
GO:0019900	MF	kinase binding	5.43152e-05	0.00488511	128	799	2149	21152	1.57681
GO:0008289	MF	lipid binding	0.000144108	0.0104525	106	736	2149	21152	1.41757
GO:0044877	MF	protein-containing complex binding	0.000114279	0.00868094	174	1232	2149	21152	1.39012
GO:0043168	MF	anion binding	0.000700764	0.0350928	341	2640	2149	21152	1.27135
GO:0043167	MF	ion binding	0.000177045	0.0120999	656	5374	2149	21152	1.20149
GO:0005515	MF	protein binding	9.33821e-11	6.77321e-08	1032	8688	2149	21152	1.16916
GO:0098772	MF	molecular function regulator	0.000483095	0.0260489	196	1699	2149	21152	1.13548
GO:0005488	MF	binding	2.86964e-07	5.65999e-05	1396	12815	2149	21152	1.07221
