# Supplementary material for: Microglia show differential transcriptomic response to Aβ peptide aggregates ex vivo and in vivo
Source: Life Sci Alliance. 2021 Jun 14;4(7):e202101108. doi: 10.26508/lsa.202101108 (PMC8321667; doi:10.26508/lsa.202101108)
Supplement: Supplementary file 11 [file LSA-2021-01108_TableS11.xlsx]

## Sheet: 1_DEGs_oligomers_12hr_vs_ctrl
GeneStableID	symbol	entrezid	baseMean	log2FoldChange	lfcSE	stat	pvalue	padj
ENSMUSG00000006818	Sod2	20656	22006.5	2.92054	0.0577962	50.5317	0	0
ENSMUSG00000015852	Fcrls	80891	40128.8	-1.82139	0.0322922	-56.4032	0	0
ENSMUSG00000017737	Mmp9	17395	32846.1	1.98442	0.0387333	51.233	0	0
ENSMUSG00000020017	Hal	15109	3622.59	2.65525	0.053619	49.5207	0	0
ENSMUSG00000021591	Glrx	93692	9749.49	1.87152	0.0457219	40.9327	0	0
ENSMUSG00000026390	Marco	17167	56707.4	5.23336	0.0674229	77.62	0	0
ENSMUSG00000026656	Fcgr2b	14130	41236.8	-1.46833	0.034983	-41.9726	0	0
ENSMUSG00000026728	Vim	22352	13348.1	1.75286	0.0404954	43.2854	0	0
ENSMUSG00000028124	Gclm	14630	14014.8	1.91543	0.0505592	37.8848	0	0
ENSMUSG00000028691	Prdx1	18477	228047	1.61733	0.0353283	45.78	0	0
ENSMUSG00000029915	Clec5a	23845	4333.89	2.67169	0.0666738	40.0711	0	0
ENSMUSG00000030142	Clec4e	56619	14627.1	3.95227	0.0816223	48.4214	0	0
ENSMUSG00000032231	Anxa2	12306	12543.5	1.28513	0.028631	44.8861	0	0
ENSMUSG00000039934	Gsap	212167	6264.12	1.82987	0.0462345	39.5779	0	0
ENSMUSG00000040026	Saa3	20210	59223.5	3.18244	0.0789075	40.3312	0	0
ENSMUSG00000044162	Tnip3	414084	1549.73	3.57125	0.0924673	38.6217	0	0
ENSMUSG00000045551	Fpr1	14293	5831.99	3.18163	0.0742362	42.8582	0	0
ENSMUSG00000046245	Pilra	231805	2688.36	3.68373	0.0743204	49.5655	0	0
ENSMUSG00000055546	Timd4	276891	1742.92	4.0964	0.0932397	43.9341	0	0
ENSMUSG00000062070	Pgk1	18655	17576.5	1.54464	0.0404302	38.2051	0	0
ENSMUSG00000063234	Gpr84	80910	9112.35	3.49423	0.0752756	46.4192	0	0
ENSMUSG00000076441	Ass1	11898	1029.79	5.25768	0.134549	39.0763	0	0
ENSMUSG00000094530	Gm21399	100862012	10460.5	1.6002	0.0423503	37.7849	0	0
ENSMUSG00000083773	Gm13394	100033452	13484.6	1.39751	0.0380172	36.7599	8.07246e-296	6.21108e-293
ENSMUSG00000047945	Marcksl1	17357	22966.7	2.73937	0.0746673	36.6877	1.14674e-294	8.47028e-292
ENSMUSG00000025044	Msr1	20288	40679.3	1.70207	0.0467436	36.413	2.65136e-290	1.88308e-287
ENSMUSG00000066632	Pgk1-rs7	668435	10275.5	1.57178	0.0433849	36.2288	2.14412e-287	1.46642e-284
ENSMUSG00000060703	Cd302	66205	5512.5	1.60372	0.0449146	35.7059	3.19765e-279	2.10885e-276
ENSMUSG00000026547	Tagln2	21346	10132.8	1.3313	0.0376296	35.379	3.59317e-274	2.28798e-271
ENSMUSG00000022707	Gbe1	74185	2899.02	1.88982	0.0536675	35.2136	1.2399e-271	7.63197e-269
ENSMUSG00000069008	Gm5537	433594	9927.48	1.56981	0.0446367	35.1686	6.03724e-271	3.59625e-268
ENSMUSG00000043091	Tuba1c	22146	21526.5	1.28133	0.0367165	34.8979	8.00679e-267	4.62042e-264
ENSMUSG00000015340	Cybb	13058	92138.7	1.42539	0.041048	34.7251	3.29718e-264	1.84502e-261
ENSMUSG00000023088	Abcc1	17250	10933	1.63174	0.0469938	34.7225	3.60215e-264	1.95639e-261
ENSMUSG00000000957	Mmp14	17387	6836.75	2.00163	0.0577237	34.6761	1.806e-263	9.52845e-261
ENSMUSG00000003420	Fcgrt	14132	7981.67	-1.45165	0.0418888	-34.6549	3.76306e-263	1.93024e-260
ENSMUSG00000036067	Slc2a6	227659	5770.43	2.43529	0.071253	34.1781	5.11648e-256	2.55354e-253
ENSMUSG00000063229	Ldha	16828	40996.4	1.26893	0.0371761	34.1329	2.3997e-255	1.16613e-252
ENSMUSG00000025161	Slc16a3	80879	5307.83	2.00246	0.058915	33.989	3.23532e-253	1.53188e-250
ENSMUSG00000031722	Hp	15439	1254.45	3.30701	0.0985575	33.5541	7.83271e-247	3.61597e-244
ENSMUSG00000025854	Fam20c	80752	36511.1	1.37979	0.0420681	32.799	6.09402e-236	2.74469e-233
ENSMUSG00000041959	S100a10	20194	1194.09	2.63996	0.0809547	32.6103	2.93067e-233	1.28852e-230
ENSMUSG00000036752	Tubb4b	227613	4750.14	1.59052	0.0489351	32.5026	9.80975e-232	4.21272e-229
ENSMUSG00000023004	Tuba1b	22143	32916.2	1.24498	0.038332	32.4789	2.11813e-231	8.88941e-229
ENSMUSG00000003814	Calr	12317	44203.6	0.930374	0.0288459	32.2532	3.1696e-228	1.30066e-225
ENSMUSG00000018920	Cxcl16	66102	13421.8	1.02292	0.0317179	32.2506	3.44656e-228	1.38357e-225
ENSMUSG00000101389	Ms4a4a	666907	2496.17	-3.46011	0.108481	-31.8961	3.02691e-223	1.18925e-220
ENSMUSG00000042129	Rassf4	213391	34155.1	1.27969	0.0402834	31.7672	1.83979e-221	7.07782e-219
ENSMUSG00000022831	Hcls1	15163	10659.2	1.40679	0.0449318	31.3095	3.46456e-215	1.30564e-212
ENSMUSG00000059040	Eno1b	433182	27311.1	1.34941	0.0431314	31.2859	7.25336e-215	2.67881e-212
ENSMUSG00000057666	Gapdh	14433	57196.5	1.21732	0.0389911	31.2204	5.63069e-214	2.03875e-211
ENSMUSG00000034641	Cd300ld	217305	3132.13	1.74789	0.0565047	30.9335	4.23118e-210	1.50256e-207
ENSMUSG00000032294	Pkm	18746	88613.5	1.14005	0.0370062	30.8071	2.10718e-208	7.34175e-206
ENSMUSG00000021025	Nfkbia	18035	12757.9	1.96437	0.0637998	30.7896	3.6136e-208	1.23572e-205
ENSMUSG00000027995	Tlr2	24088	27560.2	1.89535	0.0616459	30.7457	1.39653e-207	4.6888e-205
ENSMUSG00000072235	Tuba1a	22142	11759.1	1.4481	0.0476047	30.4192	3.06149e-203	1.00953e-200
ENSMUSG00000022126	Acod1	16365	13277.6	7.55987	0.249818	30.2616	3.67457e-201	1.19043e-198
ENSMUSG00000078965	Gm12033	100042746	10231	1.25077	0.0414814	30.1526	9.92884e-200	3.16114e-197
ENSMUSG00000064193	Gm4735	103324	25033.7	1.33844	0.0446268	29.9919	1.25225e-197	3.91932e-195
ENSMUSG00000011752	Pgam1	18648	33738.7	0.944112	0.0316082	29.8692	4.94122e-196	1.52074e-193
ENSMUSG00000066684	Pilrb1	170741	572.291	3.78825	0.127068	29.8128	2.66418e-195	8.06505e-193
ENSMUSG00000095042	Gm12537	100041342	6298.03	1.27618	0.0428186	29.8043	3.43612e-195	1.02341e-192
ENSMUSG00000064373	Selenop	20363	76434.7	-1.91037	0.064268	-29.7251	3.64028e-194	1.06701e-191
ENSMUSG00000035004	Igsf6	80719	10465.9	1.61786	0.0547318	29.5599	4.90453e-192	1.41511e-189
ENSMUSG00000058625	Gm17383	100191011	8466.1	1.26578	0.0428811	29.5184	1.67094e-191	4.747e-189
ENSMUSG00000000290	Itgb2	16414	34314.8	0.794928	0.0269348	29.513	1.9595e-191	5.48243e-189
ENSMUSG00000056737	Capg	12332	25093.6	1.02469	0.0347429	29.4936	3.47683e-191	9.58257e-189
ENSMUSG00000037306	Man1c1	230815	20926.2	-1.04933	0.0356164	-29.462	8.84427e-191	2.40174e-188
ENSMUSG00000018395	Kif3a	16568	8141.87	-1.64869	0.0561865	-29.3432	2.91851e-189	7.81061e-187
ENSMUSG00000028961	Pgd	110208	30403.7	1.15774	0.0396111	29.2276	8.63818e-188	2.27875e-185
ENSMUSG00000001525	Tubb5	22154	12876.4	1.28367	0.0439943	29.1781	3.67768e-187	9.56508e-185
ENSMUSG00000021322	Aoah	27052	5456.96	1.48633	0.0511136	29.0789	6.64417e-186	1.70405e-183
ENSMUSG00000052270	Fpr2	14289	956.213	4.41597	0.152083	29.0367	2.26813e-185	5.73745e-183
ENSMUSG00000082809	Gm14150	100043840	8503.91	1.21803	0.0419524	29.0337	2.47419e-185	6.17412e-183
ENSMUSG00000015396	Cd83	12522	20628	-1.27609	0.0441083	-28.9308	4.90031e-184	1.20652e-181
ENSMUSG00000031207	Msn	17698	64624	0.837583	0.0290578	28.8247	1.05235e-182	2.55694e-180
ENSMUSG00000078636	Gm7336	654473	6499.77	1.26834	0.0446249	28.4221	1.07794e-177	2.58509e-175
ENSMUSG00000078300	Gm2606	100040109	3284.48	1.32552	0.0467163	28.3739	4.2415e-177	1.00415e-174
ENSMUSG00000017754	Pltp	18830	15624.2	-0.903346	0.0318722	-28.3427	1.02886e-176	2.40494e-174
ENSMUSG00000081221	Gm14760	654474	6331.5	1.28259	0.0453018	28.3121	2.4545e-176	5.6656e-174
ENSMUSG00000095937	Gm12671	654475	6466.95	1.26789	0.0448034	28.299	3.55427e-176	8.10286e-174
ENSMUSG00000063524	Eno1	13806	52119.1	1.17266	0.0415216	28.2421	1.77787e-175	4.00367e-173
ENSMUSG00000029063	Nadk	192185	10486.5	0.969274	0.0343318	28.2326	2.33061e-175	5.18519e-173
ENSMUSG00000031146	Plp2	18824	1768.52	1.56122	0.0553532	28.2047	5.12169e-175	1.12416e-172
ENSMUSG00000049327	Kmt5a	67956	5387.24	1.46536	0.0519551	28.2043	5.17456e-175	1.12416e-172
ENSMUSG00000058427	Cxcl2	20310	5515.49	4.71041	0.167465	28.1277	4.49062e-174	9.64231e-172
ENSMUSG00000024646	Cyb5a	109672	9024.08	1.24012	0.0441151	28.1109	7.21342e-174	1.53107e-171
ENSMUSG00000029338	Antxr2	71914	7342.15	-1.74598	0.0622411	-28.0519	3.78878e-173	7.95041e-171
ENSMUSG00000096617	Gm5559	433921	7806.57	1.26847	0.0453607	27.9642	4.43463e-172	9.2011e-170
ENSMUSG00000036833	Pnpla7	241274	10201.6	-1.14681	0.0410784	-27.9177	1.62912e-171	3.3426e-169
ENSMUSG00000018339	Gpx3	14778	6164.13	-1.41608	0.0507382	-27.9096	2.03875e-171	4.13709e-169
ENSMUSG00000064289	Tank	21353	3421.77	1.30223	0.0467441	27.8587	8.45729e-171	1.69753e-168
ENSMUSG00000048164	Gm7204	637273	8722.02	1.62854	0.0585001	27.8382	1.4949e-170	2.96826e-168
ENSMUSG00000042349	Ikbke	56489	9384.71	1.48352	0.0533061	27.8301	1.87361e-170	3.68064e-168
ENSMUSG00000046223	Plaur	18793	2088.23	2.20416	0.0794415	27.7457	1.96194e-169	3.8136e-167
ENSMUSG00000039109	F13a1	74145	47391.9	-1.18688	0.0427803	-27.7436	2.08428e-169	4.0092e-167
ENSMUSG00000029650	Slc46a3	71706	1514.19	-2.15102	0.0778896	-27.6163	7.09873e-168	1.35139e-165
ENSMUSG00000048120	Entpd1	12495	2465.67	-1.91275	0.0704001	-27.1697	1.48005e-162	2.78883e-160
ENSMUSG00000024401	Tnf	21926	9297.32	3.66439	0.135162	27.111	7.30189e-162	1.36199e-159
ENSMUSG00000035835	Plppr3	216152	797.26	-2.55946	0.0944547	-27.0973	1.06033e-161	1.95801e-159
ENSMUSG00000002985	Apoe	11816	1.30735e+06	-1.3176	0.0486369	-27.0904	1.2761e-161	2.33312e-159
ENSMUSG00000024053	Emilin2	246707	7463.76	1.04918	0.0388336	27.0174	9.22417e-161	1.66994e-158
ENSMUSG00000001020	S100a4	20198	349.423	3.90176	0.144638	26.9759	2.83104e-160	5.07554e-158
ENSMUSG00000031799	Tpm4	326618	24013.1	1.20954	0.0448538	26.9663	3.67539e-160	6.52593e-158
ENSMUSG00000021996	Esd	13885	25695.9	1.12325	0.0417452	26.9073	1.80646e-159	3.17695e-157
ENSMUSG00000030403	Vasp	22323	7698.79	1.62417	0.0604747	26.857	6.98526e-159	1.21689e-156
ENSMUSG00000026712	Mrc1	17533	19280.6	-1.24091	0.0462451	-26.8333	1.32213e-158	2.28173e-156
ENSMUSG00000005410	Mcm5	17218	1966.01	2.22543	0.0832301	26.7383	1.68736e-157	2.88507e-155
ENSMUSG00000031129	Slc9a9	331004	4344.5	-1.55796	0.0586192	-26.5777	1.22922e-155	2.08246e-153
ENSMUSG00000021990	Spata13	219140	3022.01	1.36611	0.0518419	26.3515	4.93699e-153	8.28786e-151
ENSMUSG00000050370	Ch25h	12642	2323.31	2.3186	0.0880902	26.3207	1.11079e-152	1.84791e-150
ENSMUSG00000056153	Socs6	54607	4909.32	-1.50845	0.0575186	-26.2254	1.36335e-151	2.24782e-149
ENSMUSG00000050737	Ptges	64292	953.225	3.8167	0.145816	26.1748	5.1394e-151	8.3986e-149
ENSMUSG00000027381	Bcl2l11	12125	2885.88	-1.85999	0.0710996	-26.1604	7.51167e-151	1.21676e-148
ENSMUSG00000069939	Gm12070	654472	3818.36	1.29653	0.0497974	26.036	1.9374e-149	3.11096e-147
ENSMUSG00000030123	Plxnd1	67784	12189.3	0.967271	0.0372017	26.0007	4.86184e-149	7.73955e-147
ENSMUSG00000029816	Gpnmb	93695	287483	-1.03204	0.039992	-25.8061	7.57631e-147	1.19576e-144
ENSMUSG00000035273	Hpse	15442	7296.27	-1.34789	0.0523368	-25.7542	2.89418e-146	4.52915e-144
ENSMUSG00000031903	Pla2g15	192654	19033.1	-0.978697	0.0381179	-25.6755	2.19277e-145	3.37431e-143
ENSMUSG00000001473	Tubb6	67951	6072.9	1.13767	0.0444181	25.6129	1.09704e-144	1.67421e-142
ENSMUSG00000020649	Rrm2	20135	771.511	2.58895	0.101114	25.6042	1.36968e-144	2.07315e-142
ENSMUSG00000039316	Rftn1	76438	9407.28	-0.993315	0.0387991	-25.6015	1.46791e-144	2.20377e-142
ENSMUSG00000066026	Dhrs3	20148	22128.7	-0.894448	0.0349423	-25.5978	1.61251e-144	2.40134e-142
ENSMUSG00000094708	Gm10359	100042349	6013.76	1.24407	0.0487225	25.5338	8.31655e-144	1.22859e-141
ENSMUSG00000066682	Pilrb2	545812	654.933	3.14566	0.123257	25.5212	1.14818e-143	1.68272e-141
ENSMUSG00000021190	Lgmn	19141	57546.2	-0.88573	0.0347381	-25.4973	2.10964e-143	3.06745e-141
ENSMUSG00000002870	Mcm2	17216	2226.94	1.41845	0.0559088	25.3708	5.29576e-142	7.63996e-140
ENSMUSG00000030695	Aldoa	11674	66594.5	0.816082	0.0321901	25.352	8.54297e-142	1.2229e-139
ENSMUSG00000081534	Slc48a1	67739	22417.7	0.983236	0.0388202	25.3279	1.57332e-141	2.23484e-139
ENSMUSG00000051439	Cd14	12475	59699.2	1.29206	0.05113	25.2702	6.79904e-141	9.58404e-139
ENSMUSG00000032802	Srxn1	76650	12170.6	1.75098	0.069351	25.2481	1.18875e-140	1.66299e-138
ENSMUSG00000022106	Rcbtb2	105670	7282.36	-1.78206	0.0706607	-25.22	2.41993e-140	3.35989e-138
ENSMUSG00000037820	Tgm2	21817	2575.46	2.01717	0.0801897	25.1549	1.24838e-139	1.72034e-137
ENSMUSG00000023456	Tpi1	21991	22128.4	1.05281	0.0419573	25.0925	6.00575e-139	8.21497e-137
ENSMUSG00000049723	Mmp12	17381	41996.8	1.16752	0.0466196	25.0437	2.0461e-138	2.77819e-136
ENSMUSG00000028238	Atp6v0d2	242341	3318.82	-1.89824	0.0759707	-24.9865	8.56352e-138	1.15426e-135
ENSMUSG00000033083	Tbc1d4	210789	3571.01	-1.46019	0.0584516	-24.9812	9.79285e-138	1.3104e-135
ENSMUSG00000079227	Ccr5	12774	3419.22	-1.22317	0.0490831	-24.9203	4.47996e-137	5.90907e-135
ENSMUSG00000026938	Fcna	14133	12197.8	-0.936366	0.0376049	-24.9001	7.41829e-137	9.71533e-135
ENSMUSG00000068129	Cst7	13011	2963.06	1.48159	0.0596032	24.8575	2.14504e-136	2.78946e-134
ENSMUSG00000022895	Ets2	23872	7091.88	1.81403	0.0730593	24.8295	4.30464e-136	5.55871e-134
ENSMUSG00000068566	Myadm	50918	10256.7	0.890961	0.0360942	24.6843	1.57566e-134	2.02057e-132
ENSMUSG00000021423	Ly86	17084	14933.9	-1.04396	0.0424033	-24.6197	7.77638e-134	9.83553e-132
ENSMUSG00000027087	Itgav	16410	18505.2	-1.16972	0.0475111	-24.6199	7.73836e-134	9.83553e-132
ENSMUSG00000040229	Gpr34	23890	2667.2	-2.30928	0.0939798	-24.5721	2.50911e-133	3.15193e-131
ENSMUSG00000040204	Pclaf	68026	643.037	2.18841	0.0890723	24.5689	2.71745e-133	3.39057e-131
ENSMUSG00000020914	Top2a	21973	1651.96	1.42408	0.0580891	24.5155	1.00993e-132	1.25163e-130
ENSMUSG00000049624	Slc17a5	235504	6245.56	-1.00146	0.0409587	-24.4506	4.96365e-132	6.11058e-130
ENSMUSG00000059498	Fcgr3	14131	36880.2	-0.888009	0.0363947	-24.3994	1.73517e-131	2.12197e-129
ENSMUSG00000001228	Uhrf1	18140	1057.42	2.56281	0.105188	24.3641	4.11338e-131	4.99721e-129
ENSMUSG00000001542	Ell2	192657	6002.93	1.18719	0.0487762	24.3395	7.48002e-131	9.02785e-129
ENSMUSG00000055148	Klf2	16598	709.998	2.36588	0.0972082	24.3382	7.72217e-131	9.25958e-129
ENSMUSG00000045658	Pid1	98496	10831.8	0.714589	0.0293692	24.3313	9.14905e-131	1.08998e-128
ENSMUSG00000031400	G6pdx	14381	13363.5	0.872727	0.0358752	24.3267	1.02256e-130	1.21042e-128
ENSMUSG00000074794	Arrdc3	105171	3964	-1.86428	0.0768085	-24.2717	3.90057e-130	4.58777e-128
ENSMUSG00000028367	Txn1	22166	10396.9	0.933978	0.0385818	24.2077	1.8445e-129	2.15573e-127
ENSMUSG00000021895	Arhgef3	71704	5153.99	-1.08941	0.0450742	-24.1692	4.6939e-129	5.45142e-127
ENSMUSG00000089942	Pira2	18725	2324.27	1.30913	0.0542015	24.1531	6.92471e-129	7.99198e-127
ENSMUSG00000031584	Gsr	14782	15320.9	1.02289	0.0424706	24.0846	3.62217e-128	4.15447e-126
ENSMUSG00000024180	Tmem8	60455	3015.01	-1.64358	0.0683109	-24.0603	6.50827e-128	7.41863e-126
ENSMUSG00000021069	Pygl	110095	4656.81	0.920266	0.0384204	23.9525	8.69214e-127	9.84718e-125
ENSMUSG00000035107	Dcbld2	73379	1804.19	1.9988	0.0841287	23.7589	8.89125e-125	1.00113e-122
ENSMUSG00000018906	P4ha2	18452	1959.73	1.5059	0.0633836	23.7585	8.96954e-125	1.00383e-122
ENSMUSG00000058672	Tubb2a	22151	7925.21	0.856098	0.0360775	23.7294	1.79163e-124	1.99303e-122
ENSMUSG00000046687	Gm5424	432466	330.806	5.60226	0.236176	23.7207	2.20569e-124	2.43894e-122
ENSMUSG00000018362	Kpna2	16647	4100.35	1.15716	0.0488667	23.6799	5.80426e-124	6.37985e-122
ENSMUSG00000056904	Gm5620	434428	4198.47	1.21472	0.0513234	23.6679	7.72586e-124	8.44176e-122
ENSMUSG00000060063	Alox5ap	11690	5460.13	1.09038	0.0460711	23.6674	7.80734e-124	8.48061e-122
ENSMUSG00000038352	Arl5c	217151	1752.72	1.6687	0.0706279	23.6266	2.05299e-123	2.21699e-121
ENSMUSG00000031328	Flna	192176	45126.9	1.28236	0.0543326	23.6021	3.67169e-123	3.94194e-121
ENSMUSG00000026864	Hspa5	14828	47973.2	0.78464	0.0332737	23.5814	5.98711e-123	6.39064e-121
ENSMUSG00000082016	Pgam1-ps2	668045	13977.6	0.968901	0.041148	23.5468	1.35533e-122	1.43837e-120
ENSMUSG00000005413	Hmox1	15368	86570.6	1.33493	0.057081	23.3867	5.84334e-121	6.1659e-119
ENSMUSG00000026548	Slamf9	98365	1166.33	2.37842	0.101792	23.3655	9.5814e-121	1.00528e-118
ENSMUSG00000033192	Lpcat2	270084	11232.4	1.26071	0.0540316	23.3328	2.06198e-120	2.15122e-118
ENSMUSG00000029430	Ran	19384	10007.3	0.884838	0.0380067	23.2811	6.89328e-120	7.1512e-118
ENSMUSG00000057762	Gm6169	620648	1157.88	1.55856	0.0670049	23.2604	1.11591e-119	1.1512e-117
ENSMUSG00000040212	Emp3	13732	5669.69	0.879253	0.0378629	23.222	2.72763e-119	2.79824e-117
ENSMUSG00000019832	Rab32	67844	7561.55	0.879346	0.0379433	23.1752	8.09158e-119	8.2552e-117
ENSMUSG00000023030	Slc11a2	18174	8825.99	0.762971	0.0329503	23.1552	1.2889e-118	1.30773e-116
ENSMUSG00000024143	Rhoq	104215	7114.49	1.03698	0.044802	23.1458	1.60179e-118	1.61632e-116
ENSMUSG00000053063	Clec12a	232413	8011.29	0.898056	0.0388778	23.0995	4.68603e-118	4.70284e-116
ENSMUSG00000003283	Hck	15162	6776.21	1.41343	0.0612688	23.0693	9.42121e-118	9.4039e-116
ENSMUSG00000029730	Mcm7	17220	1534.07	1.35398	0.0587287	23.0549	1.3146e-117	1.30513e-115
ENSMUSG00000078812	Eif5a	276770	17931.6	0.822812	0.0357146	23.0386	1.91564e-117	1.89167e-115
ENSMUSG00000054510	Gm14461	329436	700.333	-2.88549	0.12532	-23.025	2.62204e-117	2.57546e-115
ENSMUSG00000017132	Cyth1	19157	7381.41	-1.26391	0.0549611	-22.9964	5.05927e-117	4.9431e-115
ENSMUSG00000024953	Prdx5	54683	28936.4	1.12227	0.0488253	22.9855	6.51247e-117	6.32944e-115
ENSMUSG00000058818	Pirb	18733	13917.5	0.977947	0.0428915	22.8005	4.53401e-115	4.38351e-113
ENSMUSG00000034265	Zdhhc14	224454	3996.88	-1.23623	0.0542884	-22.7716	8.77714e-115	8.44159e-113
ENSMUSG00000024661	Fth1	14319	1.03901e+06	0.791772	0.0348087	22.7464	1.55701e-114	1.48973e-112
ENSMUSG00000033220	Rac2	19354	18368	0.939196	0.0413483	22.7143	3.23656e-114	3.08074e-112
ENSMUSG00000066152	Slc31a2	20530	9928.52	1.32869	0.0586762	22.6445	1.58118e-113	1.49734e-111
ENSMUSG00000063694	Cycs	13063	4258.31	1.16697	0.0516942	22.5744	7.73759e-113	7.28991e-111
ENSMUSG00000028885	Smpdl3b	100340	902.951	2.53442	0.112348	22.5586	1.10581e-112	1.03654e-110
ENSMUSG00000035678	Tnfsf9	21950	1008.57	2.7322	0.121231	22.5371	1.79753e-112	1.67642e-110
ENSMUSG00000027447	Cst3	13010	61838.7	-0.800196	0.0355485	-22.51	3.31398e-112	3.07518e-110
ENSMUSG00000017002	Slpi	20568	259.103	3.9088	0.173976	22.4674	8.64282e-112	7.97992e-110
ENSMUSG00000023349	Clec4n	56620	16523.9	1.43418	0.06412	22.3671	8.23035e-111	7.56127e-109
ENSMUSG00000022346	Myc	17869	906.161	1.63415	0.0731836	22.3294	1.91272e-110	1.74853e-108
ENSMUSG00000041859	Mcm3	17215	2678.31	1.27097	0.0569869	22.3028	3.4727e-110	3.15896e-108
ENSMUSG00000031304	Il2rg	16186	1284.83	1.73714	0.0780922	22.2448	1.26672e-109	1.14663e-107
ENSMUSG00000016319	Slc25a5	11740	11140.9	0.874015	0.0393809	22.1939	3.93724e-109	3.54658e-107
ENSMUSG00000016382	Pls3	102866	2495.09	1.30843	0.0592159	22.096	3.45227e-108	3.09464e-106
ENSMUSG00000020571	Pdia6	71853	16244.3	0.910329	0.0412093	22.0904	3.91056e-108	3.48852e-106
ENSMUSG00000030220	Arhgdib	11857	20982.3	0.775649	0.035114	22.0894	3.99246e-108	3.54446e-106
ENSMUSG00000014867	Surf4	20932	16167.2	0.883573	0.0401141	22.0265	1.60556e-107	1.41858e-105
ENSMUSG00000039908	Slc26a11	268512	2575.9	-2.09973	0.0956526	-21.9516	8.35892e-107	7.35028e-105
ENSMUSG00000040322	Slc25a24	229731	2350.59	1.1701	0.0533515	21.9319	1.28856e-106	1.12771e-104
ENSMUSG00000020400	Tnip1	57783	3151.68	1.29976	0.0594772	21.8531	7.26679e-106	6.32965e-104
ENSMUSG00000058013	2021-09-11	52398	4305.72	1.42403	0.065451	21.7571	5.91354e-105	5.12673e-103
ENSMUSG00000027399	Il1a	16175	2133.33	2.4811	0.114121	21.741	8.4139e-105	7.26033e-103
ENSMUSG00000036427	Gpi1	14751	12213.8	0.799068	0.0367945	21.717	1.4166e-104	1.2167e-102
ENSMUSG00000091269	Gm6682	626534	2126.51	1.30184	0.0600236	21.6888	2.6151e-104	2.23567e-102
ENSMUSG00000009090	Ap1b1	11764	12495.9	-0.873621	0.0403291	-21.6623	4.6536e-104	3.96007e-102
ENSMUSG00000074417	Gm14548	100038909	3588.69	1.03475	0.0478992	21.6027	1.69551e-103	1.4362e-101
ENSMUSG00000038393	Txnip	56338	15744.1	-0.855182	0.0396524	-21.567	3.66896e-103	3.09365e-101
ENSMUSG00000005686	Ampd3	11717	7379.99	0.957407	0.0444491	21.5394	6.65698e-103	5.58762e-101
ENSMUSG00000047592	Nxpe5	381680	1248.1	-1.91594	0.0889992	-21.5276	8.58508e-103	7.1734e-101
ENSMUSG00000020598	Nrcam	319504	2734.14	-1.40768	0.0655307	-21.4812	2.33557e-102	1.94273e-100
ENSMUSG00000082424	Gm13292	100040898	1895.23	1.20576	0.0561315	21.481	2.34614e-102	1.94277e-100
ENSMUSG00000024556	Me2	107029	1762.51	1.23958	0.0577694	21.4574	3.89446e-102	3.2105e-100
ENSMUSG00000070348	Ccnd1	12443	1447.35	1.74675	0.0816284	21.3989	1.36908e-101	1.12362e-99
ENSMUSG00000096210	H1f0	14958	5281.73	-0.880124	0.041261	-21.3306	5.89863e-101	4.81965e-99
ENSMUSG00000030144	Clec4d	17474	10500.9	0.930032	0.0436513	21.3059	1e-100	8.13481e-99
ENSMUSG00000023015	Racgap1	26934	1444.17	1.29131	0.0606607	21.2874	1.48701e-100	1.20435e-98
ENSMUSG00000032046	Abhd12	76192	35318.7	-0.697568	0.0327774	-21.282	1.66773e-100	1.34482e-98
ENSMUSG00000024165	Jpt2	52009	5576.26	0.957693	0.0450226	21.2714	2.09145e-100	1.67189e-98
ENSMUSG00000032115	Hyou1	12282	3468.99	0.914658	0.0430134	21.2645	2.42267e-100	1.92832e-98
ENSMUSG00000040710	St8sia4	20452	6876.36	-1.30904	0.0617168	-21.2104	7.65102e-100	6.06368e-98
ENSMUSG00000027293	Ehd4	98878	14761.8	-1.07176	0.0506179	-21.1736	1.67267e-99	1.31998e-97
ENSMUSG00000025810	Nrp1	18186	21985.1	-0.738712	0.034987	-21.1139	5.92375e-99	4.65481e-97
ENSMUSG00000029414	Kntc1	208628	367.679	2.71927	0.12883	21.1075	6.79101e-99	5.31368e-97
ENSMUSG00000027994	Mcub	66815	994.664	1.50522	0.0713171	21.1061	6.99659e-99	5.45144e-97
ENSMUSG00000004609	Cd33	12489	4206.53	1.07898	0.0511697	21.0864	1.06024e-98	8.22623e-97
ENSMUSG00000037405	Icam1	15894	8196.66	1.6304	0.0776749	20.99	8.09125e-98	6.25159e-96
ENSMUSG00000016528	Mapkapk2	17164	20787.1	0.94781	0.0452666	20.9384	2.3943e-97	1.84222e-95
ENSMUSG00000069792	Wfdc17	100034251	20110.3	-1.05899	0.0507507	-20.8666	1.07796e-96	8.22543e-95
ENSMUSG00000033446	Lpar6	67168	2354.29	-1.6142	0.0773716	-20.8629	1.1634e-96	8.84091e-95
ENSMUSG00000073700	Klhl21	242785	2432.64	-1.12633	0.0542867	-20.7477	1.28533e-95	9.72741e-94
ENSMUSG00000030201	Lrp6	16974	5356.3	-1.15356	0.0557591	-20.6882	4.4251e-95	3.33526e-93
ENSMUSG00000022769	Sdf2l1	64136	5911.68	0.923781	0.044668	20.681	5.13312e-95	3.85318e-93
ENSMUSG00000076617	Ighm	16019	225.259	-3.83522	0.185706	-20.6521	9.344e-95	6.98568e-93
ENSMUSG00000028645	Slc2a1	20525	4873.44	1.27347	0.0617099	20.6364	1.29368e-94	9.63271e-93
ENSMUSG00000025130	P4hb	18453	36852.2	0.705833	0.0342286	20.6212	1.77216e-94	1.31425e-92
ENSMUSG00000058927	Gm10053	672195	2592.01	1.19768	0.0581135	20.6094	2.26226e-94	1.67099e-92
ENSMUSG00000029580	Actb	11461	114427	0.75904	0.036853	20.5964	2.95575e-94	2.17454e-92
ENSMUSG00000019987	Arg1	11846	9353.71	2.29724	0.112171	20.4798	3.25863e-93	2.38785e-91
ENSMUSG00000031429	Psmd10	53380	2378.52	1.15941	0.0566405	20.4696	4.01571e-93	2.93099e-91
ENSMUSG00000020869	Lrrc59	98238	12382.9	0.769261	0.0376051	20.4563	5.27933e-93	3.83812e-91
ENSMUSG00000020250	Txnrd1	50493	25660.8	1.07281	0.052476	20.4439	6.8144e-93	4.93469e-91
ENSMUSG00000001175	Calm1	12313	34540.4	0.853005	0.0417308	20.4406	7.2774e-93	5.24939e-91
ENSMUSG00000056220	Pla2g4a	18783	2475.7	1.15453	0.0565154	20.4286	9.31047e-93	6.68977e-91
ENSMUSG00000025701	Alox5	11689	2064.7	1.34559	0.066084	20.3618	3.6475e-92	2.61065e-90
ENSMUSG00000095159	Tubb4b-ps1	100042651	741.709	1.58327	0.0779566	20.3096	1.05662e-91	7.53343e-90
ENSMUSG00000037706	Cd81	12520	12099.4	0.68491	0.0337269	20.3075	1.10312e-91	7.83469e-90
ENSMUSG00000029840	Mtpn	14489	24791.4	0.654718	0.0322734	20.2866	1.68825e-91	1.19445e-89
ENSMUSG00000030474	Siglece	83382	2218	3.59379	0.177792	20.2134	7.45684e-91	5.25565e-89
ENSMUSG00000021003	Galc	14420	12465.9	-0.841945	0.0417055	-20.1878	1.25203e-90	8.79086e-89
ENSMUSG00000027248	Pdia3	14827	36843.2	0.641258	0.0317949	20.1686	1.84944e-90	1.29363e-88
ENSMUSG00000000149	Gna12	14673	21872.5	-0.844495	0.0419656	-20.1235	4.59313e-90	3.20063e-88
ENSMUSG00000037474	Dtl	76843	381.601	2.40925	0.119755	20.1182	5.11659e-90	3.55199e-88
ENSMUSG00000049103	Ccr2	12772	240.023	-3.25863	0.162129	-20.099	7.53667e-90	5.21244e-88
ENSMUSG00000025509	Pnpla2	66853	3863.87	-0.903791	0.0449885	-20.0894	9.13916e-90	6.29716e-88
ENSMUSG00000039206	Daglb	231871	7704.87	-1.07857	0.0538337	-20.0353	2.71292e-89	1.86233e-87
ENSMUSG00000053318	Slamf8	74748	1066.31	2.63958	0.131766	20.0324	2.87751e-89	1.96074e-87
ENSMUSG00000066621	Tecpr1	70381	10519	-0.843065	0.042085	-20.0324	2.87253e-89	1.96074e-87
ENSMUSG00000060131	Atp8b4	241633	1890.55	1.56463	0.0782188	20.0032	5.16211e-89	3.50454e-87
ENSMUSG00000020227	Irak3	73914	2570.97	1.46168	0.0731712	19.9762	8.87479e-89	6.003e-87
ENSMUSG00000026177	Slc11a1	18173	33192.8	0.695107	0.0348948	19.9201	2.72713e-88	1.83792e-86
ENSMUSG00000001128	Cfp	18636	21106.5	1.04237	0.0524045	19.8909	4.88222e-88	3.27837e-86
ENSMUSG00000023992	Trem2	83433	29114.4	-0.764429	0.0385138	-19.8482	1.14326e-87	7.64908e-86
ENSMUSG00000027469	Tpx2	72119	810.646	1.5194	0.0766689	19.8176	2.09752e-87	1.3983e-85
ENSMUSG00000028859	Csf3r	12986	8455.42	-0.693488	0.0351723	-19.7169	1.54393e-86	1.02555e-84
ENSMUSG00000049037	Clec4a1	269799	1566.67	1.64781	0.083654	19.6979	2.24837e-86	1.48811e-84
ENSMUSG00000027379	Bub1	12235	522.506	2.13004	0.108366	19.6559	5.14189e-86	3.39108e-84
ENSMUSG00000031167	Rbm3	19652	4082.55	0.881773	0.0448673	19.6529	5.46027e-86	3.58823e-84
ENSMUSG00000024892	Pcx	18563	1143.45	1.65096	0.0844178	19.5571	3.59187e-85	2.35204e-83
ENSMUSG00000040522	Tlr8	170744	5959.11	-0.892721	0.0456954	-19.5363	5.39238e-85	3.51858e-83
ENSMUSG00000017716	Birc5	11799	582.218	1.71908	0.0880102	19.5328	5.7819e-85	3.75945e-83
ENSMUSG00000041084	Ostc	66357	3725.64	0.796433	0.0408285	19.5068	9.61047e-85	6.22691e-83
ENSMUSG00000031451	Gas6	14456	37120.8	-1.26144	0.0647189	-19.491	1.30881e-84	8.4505e-83
ENSMUSG00000047747	Rnf150	330812	792.53	-1.83497	0.0942496	-19.4693	2.00106e-84	1.28751e-82
ENSMUSG00000047875	Gpr157	269604	2998.58	-1.53558	0.0788999	-19.4624	2.28845e-84	1.46731e-82
ENSMUSG00000078592	Gm4609	100043724	2133.97	1.14387	0.0587829	19.4592	2.43507e-84	1.55592e-82
ENSMUSG00000028756	Pink1	68943	2994.39	-1.05595	0.054285	-19.4519	2.80612e-84	1.78682e-82
ENSMUSG00000032076	Cadm1	54725	9037.52	-1.18047	0.0608005	-19.4155	5.70571e-84	3.62067e-82
ENSMUSG00000027111	Itga6	16403	9351.4	-0.78682	0.0405319	-19.4124	6.06666e-84	3.83654e-82
ENSMUSG00000030720	Cln3	12752	5709.36	-0.685513	0.035335	-19.4004	7.65626e-84	4.82527e-82
ENSMUSG00000074063	Osgin1	71839	1764.46	-1.37551	0.0709287	-19.3928	8.87549e-84	5.57465e-82
ENSMUSG00000005087	Cd44	12505	8913.77	0.788281	0.0407445	19.3469	2.16446e-83	1.35488e-81
ENSMUSG00000054263	Lifr	16880	739.095	-1.88288	0.0973386	-19.3436	2.30699e-83	1.43922e-81
ENSMUSG00000024659	Anxa1	16952	7777.64	0.890348	0.046078	19.3226	3.466e-83	2.15499e-81
ENSMUSG00000020057	Dram1	71712	4507.23	1.21665	0.0629694	19.3213	3.55901e-83	2.20539e-81
ENSMUSG00000059751	Rps3a3	668144	2195.72	1.32469	0.0687138	19.2783	8.16638e-83	5.04349e-81
ENSMUSG00000096255	Dynlt1b	21648	10537.7	0.584445	0.0303889	19.2322	1.991e-82	1.22553e-80
ENSMUSG00000030189	Ybx3	56449	1395.62	1.25346	0.0653338	19.1854	4.90013e-82	3.00618e-80
ENSMUSG00000033307	Mif	17319	6968.68	0.946519	0.049341	19.1832	5.11031e-82	3.12474e-80
ENSMUSG00000044197	Gpr146	80290	2775.41	-1.04558	0.0549735	-19.0198	1.16963e-80	7.12816e-79
ENSMUSG00000032122	Slc37a2	56857	16440.7	-0.970933	0.0510729	-19.0107	1.39055e-80	8.44667e-79
ENSMUSG00000040084	Bub1b	12236	748.556	1.55609	0.08194	18.9906	2.03848e-80	1.23418e-78
ENSMUSG00000041058	Wwp1	107568	12631.7	-1.44333	0.0760419	-18.9807	2.46227e-80	1.48589e-78
ENSMUSG00000053477	Tcf4	21413	4602.39	-1.1083	0.0584817	-18.9512	4.31286e-80	2.59418e-78
ENSMUSG00000029379	Cxcl3	330122	702.237	3.83742	0.202755	18.9264	6.91046e-80	4.14313e-78
ENSMUSG00000025742	Prps2	110639	7244.26	-1.13266	0.0599359	-18.8978	1.18899e-79	7.10547e-78
ENSMUSG00000032786	Alas1	11655	8486.02	0.797609	0.0422074	18.8974	1.19882e-79	7.1411e-78
ENSMUSG00000026170	Cyp27a1	104086	1814.29	-1.37447	0.0728162	-18.8758	1.80268e-79	1.07036e-77
ENSMUSG00000026355	Mcm6	17219	6293.4	1.01905	0.0540305	18.8607	2.39989e-79	1.4204e-77
ENSMUSG00000009185	Ccl8	20307	620.863	-2.13098	0.11309	-18.8432	3.34069e-79	1.9709e-77
ENSMUSG00000040466	Blvrb	233016	13203.1	0.773573	0.0412021	18.7751	1.208e-78	7.10409e-77
ENSMUSG00000027737	Slc7a11	26570	1577.23	3.68274	0.196381	18.753	1.82945e-78	1.07246e-76
ENSMUSG00000000682	Cd52	23833	9292.45	1.06316	0.0566956	18.752	1.86466e-78	1.08965e-76
ENSMUSG00000026012	Cd28	12487	4473.16	-2.44659	0.130692	-18.7203	3.38159e-78	1.96849e-76
ENSMUSG00000027435	Cd93	17064	10302.6	-1.52739	0.0815905	-18.7202	3.3899e-78	1.96849e-76
ENSMUSG00000062825	Actg1	11465	67125.2	0.666223	0.0356202	18.7035	4.63486e-78	2.68299e-76
ENSMUSG00000059994	Fcrl1	229499	704.541	-1.96042	0.104824	-18.7021	4.76296e-78	2.74853e-76
ENSMUSG00000020841	Cpd	12874	28121.3	1.07725	0.0576191	18.6961	5.33096e-78	3.06671e-76
ENSMUSG00000035697	Arhgap45	70719	13060.5	-0.725464	0.0388068	-18.6942	5.5149e-78	3.16268e-76
ENSMUSG00000016256	Ctsz	64138	93451.6	0.542899	0.0290551	18.6851	6.54155e-78	3.73982e-76
ENSMUSG00000005583	Mef2c	17260	6815.61	-1.08587	0.0581328	-18.6792	7.31332e-78	4.16814e-76
ENSMUSG00000025203	Scd2	20250	5748.47	1.20778	0.0647242	18.6604	1.03908e-77	5.88575e-76
ENSMUSG00000023272	Creld2	76737	1953.22	0.92509	0.0496439	18.6345	1.68703e-77	9.52679e-76
ENSMUSG00000001025	S100a6	20200	350.889	2.22722	0.119534	18.6325	1.75215e-77	9.86438e-76
ENSMUSG00000039942	Ptger4	19219	4511.19	1.42712	0.0767407	18.5966	3.42263e-77	1.92104e-75
ENSMUSG00000017707	Serinc3	26943	84504.9	-0.687837	0.0369921	-18.5942	3.58186e-77	2.00432e-75
ENSMUSG00000028525	Pde4b	18578	4270.89	1.27305	0.068489	18.5877	4.04106e-77	2.25445e-75
ENSMUSG00000030978	Rrm1	20133	2820.46	0.931724	0.050144	18.581	4.58239e-77	2.54875e-75
ENSMUSG00000020101	Vsir	74048	14167.3	-1.05559	0.0569506	-18.5351	1.07527e-76	5.96275e-75
ENSMUSG00000035455	Fignl1	60530	663.895	1.81393	0.098168	18.4778	3.11581e-76	1.72265e-74
ENSMUSG00000037553	Zdhhc18	503610	3539.37	0.914953	0.0497321	18.3977	1.37173e-75	7.56128e-74
ENSMUSG00000030737	Slco2b1	101488	5792.09	-3.35134	0.18217	-18.3967	1.39605e-75	7.67247e-74
ENSMUSG00000048249	Crebrf	77128	2753.7	-1.57879	0.0859068	-18.378	1.97175e-75	1.08043e-73
ENSMUSG00000022265	Ank	11732	2491.42	-0.858412	0.0467119	-18.3767	2.01786e-75	1.10242e-73
ENSMUSG00000085006	BC021767	545551	286.514	-2.55065	0.138946	-18.3572	2.89222e-75	1.57545e-73
ENSMUSG00000029390	Tmed2	56334	21734.4	0.643635	0.0350623	18.3569	2.9071e-75	1.5789e-73
ENSMUSG00000025134	Alyref	21681	2838.54	0.777883	0.0424327	18.3322	4.58393e-75	2.48231e-73
ENSMUSG00000014361	Mertk	17289	8961.19	-0.705608	0.0385623	-18.2978	8.60885e-75	4.64827e-73
ENSMUSG00000023944	Hsp90ab1	15516	32734.3	0.613814	0.0336392	18.247	2.18607e-74	1.17691e-72
ENSMUSG00000021754	Map3k1	26401	2770.63	-1.11204	0.0609656	-18.2405	2.4636e-74	1.32247e-72
ENSMUSG00000025591	Tma16	66282	1278.58	2.43441	0.133903	18.1805	7.37112e-74	3.94536e-72
ENSMUSG00000028019	Pdgfc	54635	738.613	-1.66623	0.0916825	-18.1739	8.30829e-74	4.43413e-72
ENSMUSG00000027698	Nceh1	320024	18338.6	-0.797489	0.0439443	-18.1477	1.33835e-73	7.12217e-72
ENSMUSG00000025823	Pdia4	12304	9278.62	0.828632	0.0457089	18.1285	1.90032e-73	1.00837e-71
ENSMUSG00000011008	Mcoln2	68279	2820.24	1.20438	0.0664711	18.1188	2.26442e-73	1.19813e-71
ENSMUSG00000027358	Bmp2	12156	3972.97	-1.045	0.0577135	-18.1066	2.82448e-73	1.49019e-71
ENSMUSG00000032026	Rexo2	104444	2285.4	0.961626	0.0531393	18.0963	3.40598e-73	1.79188e-71
ENSMUSG00000039361	Picalm	233489	10003.9	-0.677731	0.0374956	-18.0749	5.02024e-73	2.63363e-71
ENSMUSG00000030707	Coro1a	12721	10374.4	0.841313	0.0466985	18.0159	1.46316e-72	7.65401e-71
ENSMUSG00000091639	Gm3756	100042266	1390.73	1.21202	0.0673172	18.0047	1.79118e-72	9.34349e-71
ENSMUSG00000025969	Nrp2	18187	24771.2	0.91161	0.0506329	18.0043	1.80239e-72	9.37549e-71
ENSMUSG00000074272	Ceacam1	26365	625.033	1.7495	0.0971778	18.0031	1.84333e-72	9.56148e-71
ENSMUSG00000032915	Adgre4	52614	277.347	5.48446	0.30499	17.9824	2.67508e-72	1.3837e-70
ENSMUSG00000037341	Slc9a7	236727	749.785	-1.52944	0.0851031	-17.9716	3.2515e-72	1.67716e-70
ENSMUSG00000019850	Tnfaip3	21929	7800.85	1.29168	0.0718872	17.9681	3.46121e-72	1.78035e-70
ENSMUSG00000029999	Tgfa	21802	611.751	-1.70971	0.0952965	-17.941	5.6422e-72	2.89414e-70
ENSMUSG00000028931	Kcnab2	16498	3678.83	0.843313	0.0470814	17.9118	9.54026e-72	4.88007e-70
ENSMUSG00000026914	Psmd14	59029	3389.28	0.811561	0.0453441	17.8978	1.22578e-71	6.25282e-70
ENSMUSG00000020277	Pfkl	18641	10262.8	0.918411	0.0513702	17.8783	1.74114e-71	8.85729e-70
ENSMUSG00000004730	Adgre1	13733	96550.3	0.719353	0.0403305	17.8365	3.68269e-71	1.86826e-69
ENSMUSG00000045664	Cdc42ep2	104252	324.512	3.86011	0.216431	17.8353	3.76307e-71	1.9038e-69
ENSMUSG00000048327	Ckap2l	70466	451.867	1.65512	0.0931389	17.7705	1.19712e-70	6.03991e-69
ENSMUSG00000006219	Fblim1	74202	3225.8	-1.06247	0.0597912	-17.7697	1.21359e-70	6.10629e-69
ENSMUSG00000066878	Gm10184	100043906	2349.44	1.1748	0.066115	17.769	1.22829e-70	6.16346e-69
ENSMUSG00000030787	Lyve1	114332	543.901	-1.60593	0.0905742	-17.7305	2.43721e-70	1.21636e-68
ENSMUSG00000031355	Arhgap6	11856	893.43	-1.32245	0.0746263	-17.7209	2.89007e-70	1.43849e-68
ENSMUSG00000005873	Reep5	13476	7711.23	0.559294	0.0316487	17.6719	6.89729e-70	3.4238e-68
ENSMUSG00000014353	Tmem87b	72477	5465.86	-0.702764	0.039901	-17.6127	1.968e-69	9.7429e-68
ENSMUSG00000042675	Ypel3	66090	4777.61	-1.42006	0.0806737	-17.6025	2.3558e-69	1.16316e-67
ENSMUSG00000030766	Arhgap17	70497	5591.96	-0.607897	0.0345421	-17.5987	2.52065e-69	1.24124e-67
ENSMUSG00000044258	Ctla2a	13024	1903.23	-1.29492	0.0736504	-17.582	3.38365e-69	1.66177e-67
ENSMUSG00000031438	Rnf128	66889	12428.2	0.800116	0.0455189	17.5777	3.65335e-69	1.78946e-67
ENSMUSG00000032309	Fbxo22	71999	1959.22	0.864218	0.0492041	17.564	4.65171e-69	2.27245e-67
ENSMUSG00000022122	Ednrb	13618	23724.7	-0.962754	0.0548428	-17.5548	5.46849e-69	2.66441e-67
ENSMUSG00000022358	Fbxo32	67731	1784.1	-1.97625	0.112592	-17.5523	5.70867e-69	2.77411e-67
ENSMUSG00000023947	Nfkbie	18037	3125.83	1.56991	0.0894794	17.5449	6.50406e-69	3.15233e-67
ENSMUSG00000050390	C77080	97130	2752.86	-1.2174	0.0694723	-17.5235	9.48526e-69	4.5852e-67
ENSMUSG00000026827	Gpd2	14571	1910.84	1.51223	0.0863273	17.5174	1.05587e-68	5.09078e-67
ENSMUSG00000026360	Rgs2	19735	5030.54	-1.26363	0.0721644	-17.5104	1.19251e-68	5.73461e-67
ENSMUSG00000083327	Vcp-rs	236937	12532	0.579011	0.0331145	17.4851	1.86046e-68	8.92342e-67
ENSMUSG00000021486	Prelid1	66494	9489.83	0.773734	0.0442726	17.4766	2.16072e-68	1.03368e-66
ENSMUSG00000028044	Cks1b	54124	653.291	1.55044	0.0887257	17.4745	2.24139e-68	1.06949e-66
ENSMUSG00000021270	Hsp90aa1	15519	10146.2	0.677054	0.0387992	17.4502	3.4291e-68	1.632e-66
ENSMUSG00000028031	Dkk2	56811	1098.78	-2.08619	0.119772	-17.418	6.02376e-68	2.85951e-66
ENSMUSG00000030826	Bcat2	12036	3127.22	0.867096	0.0497888	17.4155	6.29566e-68	2.98091e-66
ENSMUSG00000030830	Itgal	16408	2096.13	1.45246	0.0834931	17.3962	8.81151e-68	4.16147e-66
ENSMUSG00000022453	Naga	17939	4041.71	-0.616693	0.0354983	-17.3725	1.33385e-67	6.28339e-66
ENSMUSG00000025574	Tk1	21877	501.535	1.83844	0.105994	17.3447	2.16244e-67	1.01607e-65
ENSMUSG00000031004	Mki67	17345	2141.56	1.61373	0.0930629	17.3403	2.33712e-67	1.09536e-65
ENSMUSG00000013974	Mcemp1	69189	250.519	2.61105	0.150609	17.3367	2.48723e-67	1.16277e-65
ENSMUSG00000022817	Itgb5	16419	32696.4	-0.792637	0.0457742	-17.3162	3.54874e-67	1.65482e-65
ENSMUSG00000005683	Cs	12974	8140.27	0.688973	0.039879	17.2766	7.06038e-67	3.28406e-65
ENSMUSG00000004508	Gab2	14389	7647.29	-0.842116	0.0488121	-17.2522	1.07727e-66	4.99821e-65
ENSMUSG00000056216	Cebpg	12611	4518.08	-0.64868	0.0376031	-17.2507	1.10513e-66	5.11462e-65
ENSMUSG00000027187	Cat	12359	21721.6	0.641987	0.0372185	17.2491	1.1365e-66	5.24663e-65
ENSMUSG00000055435	Maf	17132	5240.5	-0.839093	0.0486464	-17.2488	1.14187e-66	5.2583e-65
ENSMUSG00000004460	Dnajb11	67838	6335.19	0.653304	0.0378878	17.2431	1.25992e-66	5.78746e-65
ENSMUSG00000006442	Srm	20810	1228.44	1.30542	0.0758193	17.2176	1.96049e-66	8.98324e-65
ENSMUSG00000022822	Abcc5	27416	5532.32	0.783338	0.0456656	17.1538	5.88645e-66	2.68393e-64
ENSMUSG00000079884	Gm10698	100862175	9007.88	0.645653	0.0377102	17.1214	1.02732e-65	4.67251e-64
ENSMUSG00000018293	Pfn1	18643	29750.4	0.808474	0.047254	17.1091	1.26907e-65	5.75788e-64
ENSMUSG00000027339	Rassf2	215653	7351.98	-0.934709	0.0549219	-17.0189	5.95096e-65	2.69339e-63
ENSMUSG00000025001	Hells	15201	558.706	2.01663	0.118517	17.0156	6.29264e-65	2.84107e-63
ENSMUSG00000037266	Rsrp1	27981	22712.2	-1.32051	0.0777079	-16.9933	9.21289e-65	4.1494e-63
ENSMUSG00000022125	Cln5	211286	6504.59	0.895682	0.0528446	16.9493	1.94637e-64	8.74494e-63
ENSMUSG00000041431	Ccnb1	268697	888.758	1.72217	0.101685	16.9364	2.4256e-64	1.08716e-62
ENSMUSG00000021549	Rasa1	218397	5158.45	-0.813632	0.0480884	-16.9195	3.23196e-64	1.44507e-62
ENSMUSG00000034247	Plekhm1	353047	9265.85	-0.766554	0.0453246	-16.9126	3.63591e-64	1.62176e-62
ENSMUSG00000097979	Gm4691	100043853	437.522	1.62161	0.0959546	16.8997	4.52013e-64	2.01129e-62
ENSMUSG00000034353	Ramp1	51801	257.35	-2.39259	0.141866	-16.8651	8.13055e-64	3.60911e-62
ENSMUSG00000032418	Me1	17436	730.065	1.71476	0.101747	16.8531	9.94875e-64	4.4056e-62
ENSMUSG00000035064	Eef2k	13631	1686.1	-1.25406	0.0745865	-16.8134	1.94572e-63	8.59563e-62
ENSMUSG00000003363	Pld3	18807	35111.2	-0.468336	0.0279454	-16.759	4.86742e-63	2.14515e-61
ENSMUSG00000045502	Hcar2	80885	820.284	2.12131	0.126621	16.7532	5.36227e-63	2.35761e-61
ENSMUSG00000022102	Dok2	13449	1719.31	1.30582	0.0780898	16.722	9.0677e-63	3.9773e-61
ENSMUSG00000022952	Runx1	12394	6849.63	-0.677583	0.0405219	-16.7214	9.15152e-63	4.00455e-61
ENSMUSG00000020048	Hsp90b1	22027	23377.3	0.679407	0.0406423	16.7167	9.89832e-63	4.3211e-61
ENSMUSG00000038068	Rnf144b	218215	673.684	-2.2806	0.136446	-16.7144	1.0302e-62	4.48672e-61
ENSMUSG00000031422	Morf4l2	56397	9284.85	0.77207	0.0462686	16.6867	1.638e-62	7.117e-61
ENSMUSG00000031278	Acsl4	50790	6920.3	0.815034	0.0488596	16.6812	1.79694e-62	7.78927e-61
ENSMUSG00000003955	Fam162a	70186	1091.01	1.10658	0.0663763	16.6713	2.11783e-62	9.15875e-61
ENSMUSG00000020334	Slc22a4	30805	855.566	1.43855	0.0862918	16.6707	2.1408e-62	9.23645e-61
ENSMUSG00000000555	Itga5	16402	8229.19	0.767789	0.0460827	16.6611	2.51253e-62	1.0815e-60
ENSMUSG00000059195	Gm12715	100039940	34474	0.689072	0.0414057	16.642	3.46046e-62	1.48607e-60
ENSMUSG00000037260	Hgsnat	52120	17993.8	-0.556552	0.0335252	-16.601	6.85468e-62	2.93686e-60
ENSMUSG00000071172	Srsf3	20383	7797.1	0.619257	0.0373378	16.5853	8.90808e-62	3.80779e-60
ENSMUSG00000032633	Flcn	216805	6150.27	-0.660279	0.0399274	-16.537	1.98693e-61	8.47359e-60
ENSMUSG00000041992	Rapgef5	217944	4684.03	0.687123	0.0415939	16.5198	2.64255e-61	1.12436e-59
ENSMUSG00000008892	Vdac3	22335	5733.01	0.612391	0.0370763	16.517	2.76733e-61	1.17475e-59
ENSMUSG00000033857	Engase	217364	1554.67	-1.70208	0.103053	-16.5166	2.78776e-61	1.18071e-59
ENSMUSG00000045382	Cxcr4	12767	3349.88	-1.3221	0.0800931	-16.507	3.26694e-61	1.38049e-59
ENSMUSG00000028874	Fgr	14191	218.491	2.86975	0.174032	16.4898	4.34378e-61	1.83133e-59
ENSMUSG00000035385	Ccl2	20296	2021.3	4.52891	0.274715	16.4858	4.63753e-61	1.95072e-59
ENSMUSG00000040433	Zbtb38	245007	2383.37	-1.05874	0.0642924	-16.4675	6.27777e-61	2.63467e-59
ENSMUSG00000035824	Tk2	57813	3077.74	-0.979188	0.059512	-16.4536	7.8988e-61	3.30747e-59
ENSMUSG00000028333	Anp32b	67628	3879.88	0.710951	0.0432422	16.4411	9.70605e-61	4.05502e-59
ENSMUSG00000020340	Cyfip2	76884	1591.92	1.06253	0.0646567	16.4334	1.10365e-60	4.60045e-59
ENSMUSG00000052397	Ezr	22350	2132.6	0.979884	0.0596409	16.4297	1.17174e-60	4.87326e-59
ENSMUSG00000027276	Jag1	16449	5370.03	1.0239	0.062409	16.4063	1.72459e-60	7.15646e-59
ENSMUSG00000028452	Vcp	269523	21418.8	0.547922	0.0333978	16.4059	1.7345e-60	7.18147e-59
ENSMUSG00000034854	Mfsd12	73822	12342.9	-0.610737	0.0372385	-16.4007	1.89073e-60	7.8108e-59
ENSMUSG00000051343	Rab11fip5	52055	9970.82	-0.569129	0.0347413	-16.3819	2.57595e-60	1.06178e-58
ENSMUSG00000069083	Gm10259	100039592	2121.2	1.18889	0.0727141	16.3502	4.33305e-60	1.78205e-58
ENSMUSG00000000730	Dnmt3l	54427	166.688	3.76319	0.230541	16.3233	6.7433e-60	2.76715e-58
ENSMUSG00000044629	Cnrip1	380686	930.075	-1.37852	0.0844904	-16.3157	7.62659e-60	3.12267e-58
ENSMUSG00000002983	Relb	19698	4178.47	1.05893	0.0649077	16.3145	7.78989e-60	3.18248e-58
ENSMUSG00000099397	Gm7809	665825	933.679	1.17859	0.0722868	16.3043	9.19809e-60	3.74949e-58
ENSMUSG00000020034	Tcp11l2	216198	2749.31	-1.55593	0.0954404	-16.3026	9.45885e-60	3.84729e-58
ENSMUSG00000080917	Gm15925	100502662	1248.51	1.06828	0.0655736	16.2913	1.13866e-59	4.62121e-58
ENSMUSG00000079575	Rbpj-ps3	19667	3776.83	0.678627	0.0418404	16.2194	3.67691e-59	1.48899e-57
ENSMUSG00000027589	Pcmtd2	245867	2281.74	-0.91274	0.0563991	-16.1836	6.58433e-59	2.66053e-57
ENSMUSG00000005481	Ddx39	68278	2839.99	0.882578	0.054636	16.1538	1.06801e-58	4.30609e-57
ENSMUSG00000029380	Cxcl1	14825	960.043	4.24783	0.263087	16.1461	1.20921e-58	4.86476e-57
ENSMUSG00000020873	Slc35b1	110172	2136.79	0.99986	0.0619309	16.1448	1.23596e-58	4.96157e-57
ENSMUSG00000030096	Slc6a6	21366	34866	-0.633691	0.0392901	-16.1285	1.608e-58	6.44108e-57
ENSMUSG00000025225	Nfkb2	18034	6625.89	1.09682	0.0680577	16.116	1.96911e-58	7.87046e-57
ENSMUSG00000054408	Spcs3	76687	12512.7	0.567854	0.0352397	16.114	2.03307e-58	8.10857e-57
ENSMUSG00000041797	Abca9	217262	6724.73	-1.13049	0.0703592	-16.0675	4.3147e-58	1.71714e-56
ENSMUSG00000052593	Adam17	11491	28070	0.604876	0.0376558	16.0633	4.61427e-58	1.83241e-56
ENSMUSG00000034343	Ube2f	67921	3773.21	0.726399	0.0452532	16.0519	5.54735e-58	2.19823e-56
ENSMUSG00000062901	Klhl24	75785	6563.19	-1.03059	0.0644542	-15.9895	1.51341e-57	5.9843e-56
ENSMUSG00000038400	Pmepa1	65112	3560.15	-1.19064	0.0745475	-15.9716	2.01476e-57	7.94968e-56
ENSMUSG00000058317	Ube2e2	218793	533.644	1.44599	0.0905548	15.9681	2.13289e-57	8.39787e-56
ENSMUSG00000081684	Rps2-ps13	546298	4217.73	0.669222	0.0420278	15.9233	4.36581e-57	1.7153e-55
ENSMUSG00000037822	Smim14	68552	8168.34	-0.590372	0.037158	-15.8882	7.65416e-57	3.00089e-55
ENSMUSG00000030748	Il4ra	16190	9875.1	-0.68712	0.0432548	-15.8854	7.99699e-57	3.12865e-55
ENSMUSG00000045092	S1pr1	13609	14624.7	-0.933222	0.0587705	-15.8791	8.84462e-57	3.45296e-55
ENSMUSG00000026669	Mcm10	70024	329.623	2.14235	0.134933	15.8771	9.12495e-57	3.55488e-55
ENSMUSG00000073468	Sft2d1	106489	5914.93	-0.606727	0.0382489	-15.8626	1.1507e-56	4.47344e-55
ENSMUSG00000016283	H2-M2	14990	403.146	4.02297	0.253756	15.8537	1.32548e-56	5.14209e-55
ENSMUSG00000038459	Abhd17c	70178	4727.5	0.706477	0.0445776	15.8483	1.44533e-56	5.59528e-55
ENSMUSG00000028378	Ptgr1	67103	1537.26	0.940945	0.0593804	15.846	1.49739e-56	5.78468e-55
ENSMUSG00000028156	Eif4e	13684	5001.04	0.69191	0.0436713	15.8436	1.55693e-56	6.00215e-55
ENSMUSG00000043017	Ptgir	19222	498.802	2.323	0.146774	15.8271	2.024e-56	7.7865e-55
ENSMUSG00000024164	C3	12266	25207.8	1.94008	0.122667	15.8158	2.42294e-56	9.30187e-55
ENSMUSG00000002103	Acp2	11432	10869.3	0.562857	0.0356259	15.7991	3.15618e-56	1.20917e-54
ENSMUSG00000002992	Apoc2	11813	2665.37	-1.0003	0.0634376	-15.7682	5.14788e-56	1.96813e-54
ENSMUSG00000044708	Kcnj10	16513	2528.41	-0.939975	0.059711	-15.7421	7.78586e-56	2.97053e-54
ENSMUSG00000055612	Cdca7	66953	243.414	2.48525	0.157888	15.7406	7.96911e-56	3.03418e-54
ENSMUSG00000026701	Prdx6	11758	6769.11	0.86956	0.0552573	15.7366	8.49174e-56	3.22651e-54
ENSMUSG00000027715	Ccna2	12428	883.551	1.64794	0.104756	15.7312	9.24972e-56	3.5073e-54
ENSMUSG00000038332	Sesn1	140742	7963.74	-0.787767	0.0500866	-15.7281	9.70699e-56	3.67314e-54
ENSMUSG00000032594	Ip6k1	27399	5676.31	-0.818463	0.0520506	-15.7244	1.02977e-55	3.8887e-54
ENSMUSG00000031431	Tsc22d3	14605	1376.26	-1.43531	0.0913316	-15.7154	1.18691e-55	4.47295e-54
ENSMUSG00000028527	Ak4	11639	386.922	2.1951	0.139822	15.6992	1.53138e-55	5.75935e-54
ENSMUSG00000056076	Eif3b	27979	8262.94	0.567181	0.0361567	15.6868	1.86322e-55	6.99312e-54
ENSMUSG00000025372	Baiap2	108100	2834.28	-0.842507	0.0537654	-15.6701	2.42311e-55	9.07609e-54
ENSMUSG00000002835	Chaf1a	27221	589.536	1.76244	0.11251	15.6647	2.63562e-55	9.85209e-54
ENSMUSG00000031934	Panx1	55991	790.66	1.16399	0.0744085	15.6432	3.69712e-55	1.37921e-53
ENSMUSG00000028656	Cap1	12331	23536	0.467604	0.0299011	15.6383	3.99069e-55	1.48573e-53
ENSMUSG00000001270	Ckb	12709	7970.37	0.579793	0.0371344	15.6134	5.90462e-55	2.19386e-53
ENSMUSG00000091957	Rps2-ps10	667279	6245.8	0.661413	0.0423642	15.6125	5.98004e-55	2.21742e-53
ENSMUSG00000025503	Taldo1	21351	25195	0.760497	0.0487116	15.6122	6.00887e-55	2.22364e-53
ENSMUSG00000015837	Sqstm1	18412	52580.3	0.463857	0.0297218	15.6066	6.55953e-55	2.42257e-53
ENSMUSG00000025283	Sat1	20229	20722.3	-0.657588	0.042169	-15.5941	7.98084e-55	2.9416e-53
ENSMUSG00000021759	Plpp1	19012	261.833	2.39917	0.153891	15.59	8.51003e-55	3.1304e-53
ENSMUSG00000021281	Tnfaip2	21928	25168.2	1.01185	0.0650894	15.5456	1.70499e-54	6.25933e-53
ENSMUSG00000021831	Ero1l	50527	4002.66	0.875147	0.056347	15.5314	2.12771e-54	7.79568e-53
ENSMUSG00000063354	Slc39a4	72027	465.885	2.08713	0.134405	15.5286	2.22117e-54	8.12199e-53
ENSMUSG00000030865	Chp2	70261	156.572	-3.23859	0.208651	-15.5216	2.47751e-54	9.04145e-53
ENSMUSG00000025287	Acot9	56360	2315.61	0.85568	0.0553174	15.4686	5.65582e-54	2.05997e-52
ENSMUSG00000039191	Rbpj	19664	13031.4	0.579665	0.0375107	15.4533	7.16237e-54	2.60355e-52
ENSMUSG00000028459	Cd72	12517	6508.42	0.958567	0.0620918	15.4379	9.09955e-54	3.30122e-52
ENSMUSG00000006235	Epor	13857	508.684	-1.56392	0.101312	-15.4366	9.28844e-54	3.36314e-52
ENSMUSG00000040093	Bmf	171543	877.583	-1.62302	0.10523	-15.4235	1.13717e-53	4.10941e-52
ENSMUSG00000061175	Fnip2	329679	11470.8	-0.835613	0.0542299	-15.4087	1.43037e-53	5.15884e-52
ENSMUSG00000043889	Gm8399	666979	10256.8	0.68702	0.0445926	15.4066	1.47758e-53	5.31873e-52
ENSMUSG00000005732	Ranbp1	19385	3677.96	0.756109	0.0491131	15.3952	1.76169e-53	6.32906e-52
ENSMUSG00000020077	Srgn	19073	5597.82	0.725198	0.0471274	15.388	1.96959e-53	7.06223e-52
ENSMUSG00000052833	Sae1	56459	4199.21	0.699186	0.0454556	15.3817	2.17067e-53	7.76815e-52
ENSMUSG00000024663	Rab3il1	74760	7795.82	-0.583175	0.0379297	-15.3751	2.40308e-53	8.58323e-52
ENSMUSG00000092074	Dynlt1a	100310872	6110.26	0.52975	0.0344901	15.3595	3.05961e-53	1.09071e-51
ENSMUSG00000038991	Txndc5	105245	8250.01	0.650001	0.0423361	15.3534	3.36304e-53	1.19657e-51
ENSMUSG00000043336	Filip1l	78749	993.791	1.6023	0.104373	15.3517	3.44967e-53	1.22503e-51
ENSMUSG00000028497	Hacd4	66775	7213.97	-0.712893	0.0465523	-15.3138	6.18421e-53	2.19189e-51
ENSMUSG00000029082	Bst1	12182	630.736	1.67044	0.109167	15.3016	7.45669e-53	2.63784e-51
ENSMUSG00000027323	Rad51	19361	264.683	2.17062	0.141952	15.2912	8.74579e-53	3.08795e-51
ENSMUSG00000001768	Rin2	74030	10748.8	-0.799679	0.0523341	-15.2803	1.03522e-52	3.64816e-51
ENSMUSG00000021477	Ctsl	13039	52511.5	-0.628134	0.0411674	-15.258	1.45557e-52	5.11971e-51
ENSMUSG00000042265	Trem1	58217	302.965	2.36581	0.155166	15.247	1.72446e-52	6.05396e-51
ENSMUSG00000029810	Tmem176b	65963	23367.8	0.627704	0.0411893	15.2395	1.93314e-52	6.77369e-51
ENSMUSG00000030062	Rpn1	103963	17305	0.511463	0.0335716	15.235	2.07189e-52	7.24612e-51
ENSMUSG00000081999	Gm13461	625094	1791.78	0.970755	0.0637599	15.2252	2.40762e-52	8.40438e-51
ENSMUSG00000033540	Idua	15932	3881.51	-0.687496	0.0451579	-15.2243	2.44141e-52	8.50625e-51
ENSMUSG00000026365	Cfh	12628	34860.3	-0.674771	0.0443479	-15.2154	2.79586e-52	9.72284e-51
ENSMUSG00000030671	Pde3b	18576	5268.48	-0.820159	0.0539175	-15.2114	2.97273e-52	1.03185e-50
ENSMUSG00000000579	Dynlt1c	100040563	10235.2	0.431021	0.0283472	15.2051	3.27246e-52	1.13376e-50
ENSMUSG00000074280	Gm6166	101056162	6235.61	-0.649367	0.0427339	-15.1956	3.78256e-52	1.30803e-50
ENSMUSG00000030427	Lilra6	18726	1079.88	1.02006	0.0672003	15.1793	4.84569e-52	1.67253e-50
ENSMUSG00000032939	Nup93	71805	2469.8	0.800357	0.0527568	15.1707	5.52966e-52	1.90505e-50
ENSMUSG00000053317	Sec61b	66212	2046.97	0.821569	0.0541616	15.1688	5.68684e-52	1.95555e-50
ENSMUSG00000030659	Nucb2	53322	1814.88	0.921438	0.0607717	15.1623	6.28445e-52	2.15704e-50
ENSMUSG00000030298	Sec13	110379	3631.45	0.716228	0.0472651	15.1534	7.19278e-52	2.46423e-50
ENSMUSG00000021939	Ctsb	13030	842822	-0.492713	0.0325173	-15.1523	7.31117e-52	2.50015e-50
ENSMUSG00000096606	Tpbgl	100503386	987.214	-1.22218	0.0806608	-15.1521	7.33382e-52	2.50326e-50
ENSMUSG00000006611	Hfe	15216	3177.46	-0.817644	0.0539679	-15.1506	7.51296e-52	2.55967e-50
ENSMUSG00000005470	Asf1b	66929	788.56	1.17721	0.0777443	15.1421	8.54343e-52	2.9054e-50
ENSMUSG00000058624	Gda	14544	806.265	1.95333	0.129169	15.1223	1.1547e-51	3.9196e-50
ENSMUSG00000019122	Ccl9	20308	12030.1	0.953138	0.063039	15.1198	1.19857e-51	4.06108e-50
ENSMUSG00000046434	Hnrnpa1	15382	2976.88	0.78566	0.0520423	15.0966	1.70547e-51	5.76799e-50
ENSMUSG00000037313	Tacc3	21335	1724.83	1.34397	0.0890445	15.0932	1.79502e-51	6.05976e-50
ENSMUSG00000069744	Psmb3	26446	3934.55	0.667933	0.0442669	15.0888	1.91998e-51	6.46976e-50
ENSMUSG00000021957	Tkt	21881	10288.2	0.648101	0.0429576	15.087	1.97223e-51	6.63374e-50
ENSMUSG00000032724	Abtb2	99382	185.41	3.32637	0.220645	15.0756	2.34237e-51	7.86441e-50
ENSMUSG00000030681	Mvp	78388	9514.14	0.611319	0.040569	15.0686	2.60404e-51	8.71127e-50
ENSMUSG00000036820	Amdhd2	245847	4618.53	-0.674011	0.0447293	-15.0687	2.60315e-51	8.71127e-50
ENSMUSG00000017499	Cdc6	23834	216.374	2.61324	0.173526	15.0596	2.98492e-51	9.96736e-50
ENSMUSG00000080242	Atp6v0c-ps2	100039636	27568.3	0.437046	0.0290276	15.0562	3.14304e-51	1.04764e-49
ENSMUSG00000029467	Atp2a2	11938	13791.7	0.507788	0.0337541	15.0437	3.79504e-51	1.26269e-49
ENSMUSG00000031506	Ptpn7	320139	1899.18	0.954453	0.0634645	15.0392	4.06709e-51	1.35077e-49
ENSMUSG00000075595	Zfp652	268469	1887.26	-0.92783	0.0617106	-15.0352	4.31822e-51	1.4316e-49
ENSMUSG00000006398	Cdc20	107995	543.57	1.27918	0.0851112	15.0295	4.70858e-51	1.55822e-49
ENSMUSG00000028792	Ak2	11637	2529.9	0.765044	0.0509558	15.0139	5.95543e-51	1.96732e-49
ENSMUSG00000062933	Gm10123	19034	34368.6	0.583899	0.0389221	15.0017	7.15591e-51	2.35966e-49
ENSMUSG00000017781	Pitpna	18738	21231.1	0.426361	0.0285141	14.9526	1.49693e-50	4.92733e-49
ENSMUSG00000021493	Pdlim7	67399	795.559	1.40385	0.0939069	14.9494	1.57174e-50	5.16437e-49
ENSMUSG00000001419	Mef2d	17261	3529.19	-0.642462	0.0430094	-14.9377	1.87243e-50	6.14144e-49
ENSMUSG00000027018	Hat1	107435	2091.01	0.777853	0.0520766	14.9367	1.90159e-50	6.22603e-49
ENSMUSG00000053559	Smagp	207818	1474.01	-0.992184	0.0664592	-14.9292	2.12753e-50	6.95344e-49
ENSMUSG00000038886	Man2a2	140481	8155.93	-0.829572	0.0556073	-14.9184	2.50203e-50	8.16299e-49
ENSMUSG00000001416	Cct3	12462	7458.45	0.55301	0.0370972	14.907	2.96662e-50	9.66166e-49
ENSMUSG00000005803	Sqor	59010	5555.24	0.557198	0.0374038	14.8968	3.45594e-50	1.12355e-48
ENSMUSG00000032440	Tgfbr2	21813	33906.1	-0.559566	0.0375688	-14.8945	3.58097e-50	1.16215e-48
ENSMUSG00000026923	Notch1	18128	3118.32	-1.03967	0.0698443	-14.8855	4.09119e-50	1.3254e-48
ENSMUSG00000021876	Rnase4	58809	4317.95	-0.77812	0.0523344	-14.8682	5.30082e-50	1.71427e-48
ENSMUSG00000036617	Etl4	208618	1089.82	-1.21042	0.081495	-14.8527	6.68557e-50	2.15832e-48
ENSMUSG00000040848	Sft2d2	108735	8487.71	-0.75805	0.0510533	-14.8482	7.14405e-50	2.3023e-48
ENSMUSG00000066306	Numa1	101706	8154.19	-0.648431	0.0436815	-14.8445	7.5485e-50	2.42841e-48
ENSMUSG00000025613	Cct8	12469	8824.74	0.599937	0.0404156	14.8442	7.58669e-50	2.43645e-48
ENSMUSG00000056612	Ppp1r14b	18938	3509.73	1.08745	0.0733323	14.8291	9.50253e-50	3.04642e-48
ENSMUSG00000020577	Tspan13	66109	572.328	-1.53618	0.103614	-14.8259	9.95746e-50	3.18673e-48
ENSMUSG00000028896	Rcc1	100088	927.793	0.959472	0.0647278	14.8232	1.03762e-49	3.315e-48
ENSMUSG00000001741	Il16	16170	1176.88	-0.903188	0.0609516	-14.8181	1.11863e-49	3.56763e-48
ENSMUSG00000030793	Pycard	66824	2668.19	0.830306	0.0560384	14.8167	1.14204e-49	3.63602e-48
ENSMUSG00000038943	Prc1	233406	817.218	1.51279	0.102125	14.8131	1.20531e-49	3.83086e-48
ENSMUSG00000027533	Fabp5	16592	18135	-0.608871	0.0411106	-14.8106	1.25194e-49	3.97222e-48
ENSMUSG00000028212	Ccne2	12448	221	2.42231	0.163796	14.7885	1.73659e-49	5.5005e-48
ENSMUSG00000045136	Tubb2b	73710	2321.59	0.973065	0.0658515	14.7767	2.07211e-49	6.55198e-48
ENSMUSG00000021846	Peli2	93834	1666.25	-0.87827	0.059471	-14.7681	2.35419e-49	7.43118e-48
ENSMUSG00000041879	Ipo9	226432	6560.2	0.570956	0.0387504	14.7342	3.88778e-49	1.22511e-47
ENSMUSG00000029512	Ulk1	22241	3226.44	-0.92969	0.0631776	-14.7155	5.12618e-49	1.61261e-47
ENSMUSG00000026457	Adipor1	72674	26328.8	-0.472251	0.0321019	-14.711	5.48136e-49	1.72141e-47
ENSMUSG00000025804	Ccr1	12768	9750.41	-0.70238	0.0477477	-14.7102	5.54079e-49	1.73712e-47
ENSMUSG00000027006	Dnajc10	66861	6736.12	0.677038	0.0460475	14.703	6.16375e-49	1.92915e-47
ENSMUSG00000020901	Pik3r5	320207	10824.9	0.546499	0.0371768	14.7	6.44827e-49	2.01478e-47
ENSMUSG00000022637	Cblb	208650	1459.05	-0.879864	0.0598681	-14.6967	6.76796e-49	2.1111e-47
ENSMUSG00000058542	Gm15590	100270751	163351	0.545626	0.0371283	14.6957	6.86765e-49	2.13859e-47
ENSMUSG00000027306	Nusap1	108907	534.331	1.39925	0.0953302	14.6779	8.93088e-49	2.77639e-47
ENSMUSG00000021024	Psma6	26443	6945.16	0.612023	0.0417473	14.6602	1.15987e-48	3.59968e-47
ENSMUSG00000071866	Ppia	268373	51255	0.560611	0.0382654	14.6506	1.33545e-48	4.13764e-47
ENSMUSG00000020097	Sgpl1	20397	48195.9	-0.501007	0.0342286	-14.6371	1.62873e-48	5.03789e-47
ENSMUSG00000074785	Plxnc1	54712	11860.1	-0.734809	0.0502047	-14.6363	1.64914e-48	5.09249e-47
ENSMUSG00000027611	Procr	19124	564.277	1.5146	0.103673	14.6095	2.44448e-48	7.53587e-47
ENSMUSG00000028822	Tmem50a	71817	10777.7	-0.515116	0.0353309	-14.5798	3.77876e-48	1.16298e-46
ENSMUSG00000062127	Cttnbp2nl	80281	8211.76	-0.765857	0.0525592	-14.5713	4.2759e-48	1.31379e-46
ENSMUSG00000026875	Traf1	22029	274.927	4.7677	0.327203	14.5711	4.29044e-48	1.31607e-46
ENSMUSG00000036611	Eepd1	67484	3932.36	-0.681417	0.0467683	-14.5701	4.35394e-48	1.33333e-46
ENSMUSG00000031996	Aplp2	11804	37886.2	-0.54867	0.0376718	-14.5645	4.72612e-48	1.44491e-46
ENSMUSG00000022885	St6gal1	20440	12061.2	-0.962768	0.0661125	-14.5626	4.85859e-48	1.48295e-46
ENSMUSG00000051682	Treml4	224840	125.444	4.21323	0.289472	14.5549	5.43876e-48	1.6573e-46
ENSMUSG00000030156	Cd69	12515	1125.03	4.00909	0.275837	14.5343	7.34859e-48	2.23557e-46
ENSMUSG00000004709	Cd244a	18106	519.91	1.6257	0.111882	14.5304	7.77191e-48	2.36046e-46
ENSMUSG00000054717	Hmgb2	97165	2441.31	0.885278	0.0610108	14.5102	1.04453e-47	3.16722e-46
ENSMUSG00000006494	Pdk1	228026	4028.07	0.947333	0.0653868	14.4881	1.43978e-47	4.35852e-46
ENSMUSG00000053040	Aph1c	68318	2815.22	-1.29091	0.0891763	-14.476	1.71911e-47	5.19559e-46
ENSMUSG00000004798	Ulk2	29869	6778.95	-0.674635	0.0467076	-14.4438	2.74325e-47	8.27726e-46
ENSMUSG00000032575	Manf	74840	2275.1	1.01617	0.0703874	14.4369	3.03284e-47	9.13612e-46
ENSMUSG00000062382	Ftl1-ps1	634386	263622	0.546807	0.0379073	14.4249	3.60981e-47	1.08565e-45
ENSMUSG00000040430	Pitpnc1	71795	5038.89	-0.979256	0.0678891	-14.4243	3.63681e-47	1.09199e-45
ENSMUSG00000082062	Ftl2-ps	14337	158692	0.538712	0.037351	14.423	3.71078e-47	1.11239e-45
ENSMUSG00000001403	Ube2c	68612	452.131	1.52843	0.105991	14.4204	3.85369e-47	1.15336e-45
ENSMUSG00000058355	Abce1	24015	5078.7	0.65702	0.045622	14.4014	5.07336e-47	1.51593e-45
ENSMUSG00000068039	Tcp1	21454	5698.75	0.677675	0.047072	14.3966	5.43872e-47	1.62248e-45
ENSMUSG00000034088	Hdlbp	110611	11378.5	0.485928	0.0337569	14.3949	5.56925e-47	1.65874e-45
ENSMUSG00000023367	Tmem176a	66058	9399.71	0.611015	0.0424545	14.3922	5.78886e-47	1.72137e-45
ENSMUSG00000035356	Nfkbiz	80859	8349.15	0.999324	0.0695491	14.3686	8.1436e-47	2.41768e-45
ENSMUSG00000020290	Xpo1	103573	6278.96	0.666465	0.0464362	14.3523	1.03082e-46	3.0554e-45
ENSMUSG00000034709	Ppp1r21	73825	3042.81	0.791251	0.0551413	14.3495	1.07287e-46	3.17493e-45
ENSMUSG00000022673	Mcm4	17217	1910.88	1.11455	0.0777399	14.3369	1.28595e-46	3.7994e-45
ENSMUSG00000040855	Reps2	194590	4861.6	-1.25548	0.0875979	-14.3323	1.37449e-46	4.05452e-45
ENSMUSG00000002997	Prkar2b	19088	1518.58	1.1889	0.0829569	14.3316	1.38896e-46	4.09068e-45
ENSMUSG00000003849	Nqo1	18104	271.067	2.13604	0.149097	14.3265	1.49484e-46	4.3955e-45
ENSMUSG00000029925	Tbxas1	21391	19100.4	-0.523465	0.0365399	-14.3258	1.50895e-46	4.42994e-45
ENSMUSG00000026288	Inpp5d	16331	15815	-0.431336	0.0301096	-14.3255	1.51563e-46	4.44248e-45
ENSMUSG00000033159	Cnppd1	69171	3678.08	-0.675782	0.0471828	-14.3226	1.58007e-46	4.62401e-45
ENSMUSG00000021116	Eif2s1	13665	5216.86	0.599629	0.0419125	14.3067	1.98775e-46	5.80787e-45
ENSMUSG00000024421	Lama3	16774	859.605	-1.57405	0.110048	-14.3034	2.08467e-46	6.08144e-45
ENSMUSG00000049866	Arl4c	320982	4417.87	-0.629465	0.0440678	-14.284	2.75263e-46	8.01736e-45
ENSMUSG00000028278	Rragd	52187	2562.4	-1.20064	0.0840801	-14.2797	2.92712e-46	8.51217e-45
ENSMUSG00000025027	Xpnpep1	170750	4104.39	0.627867	0.0441403	14.2244	6.46911e-46	1.87828e-44
ENSMUSG00000040751	Lat2	56743	5783.29	0.76517	0.053803	14.2217	6.71936e-46	1.94788e-44
ENSMUSG00000042207	Kdm5b	75605	2670.67	-0.65598	0.0461257	-14.2216	6.73163e-46	1.94837e-44
ENSMUSG00000025791	Pgm2	72157	2411.66	0.723253	0.0508679	14.2182	7.06057e-46	2.04038e-44
ENSMUSG00000019992	Mtfr2	71804	129.441	3.00219	0.21171	14.1806	1.20756e-45	3.4842e-44
ENSMUSG00000007029	Vars	22321	3930.19	0.912065	0.0643606	14.1712	1.3818e-45	3.9807e-44
ENSMUSG00000022415	Syngr1	20972	7090.01	-0.634905	0.0448617	-14.1525	1.80212e-45	5.18349e-44
ENSMUSG00000031586	Rbpms	19663	964.026	1.38372	0.0977793	14.1514	1.82977e-45	5.25482e-44
ENSMUSG00000034663	Bmp2k	140780	6055.77	-0.585544	0.0413883	-14.1476	1.93318e-45	5.54319e-44
ENSMUSG00000095677	Dynlt1f	100040531	7849.75	0.44479	0.031451	14.1423	2.08287e-45	5.96315e-44
ENSMUSG00000010307	Tmem86a	67893	10106.3	-0.556978	0.0394244	-14.1277	2.56202e-45	7.32358e-44
ENSMUSG00000020272	Stk10	20868	4567.46	0.625976	0.0443327	14.12	2.8608e-45	8.16499e-44
ENSMUSG00000031214	Ophn1	94190	3651.21	-0.827413	0.0586283	-14.1129	3.16507e-45	9.01946e-44
ENSMUSG00000029401	Rilpl2	80291	2990.2	0.681249	0.0482854	14.1088	3.35204e-45	9.53757e-44
ENSMUSG00000030867	Plk1	18817	463.626	1.5718	0.111415	14.1076	3.40841e-45	9.68304e-44
ENSMUSG00000005142	Man2b1	17159	40786.9	-0.470061	0.0333217	-14.1068	3.45119e-45	9.78952e-44
ENSMUSG00000020654	Adcy3	104111	1917.21	-1.1171	0.0792521	-14.0955	4.04653e-45	1.14606e-43
ENSMUSG00000030245	Golt1b	66964	2105.17	0.811941	0.05761	14.0938	4.14906e-45	1.1733e-43
ENSMUSG00000016921	Srsf6	67996	5195.67	0.529215	0.0376164	14.0687	5.91187e-45	1.66925e-43
ENSMUSG00000019433	Gipc1	67903	4295.95	0.713005	0.0507217	14.0572	6.95855e-45	1.96178e-43
ENSMUSG00000027423	Snx5	69178	13428.5	-0.688175	0.048975	-14.0516	7.53462e-45	2.12095e-43
ENSMUSG00000062038	Gm10108	670717	1304.24	1.17881	0.0839427	14.0431	8.49729e-45	2.3883e-43
ENSMUSG00000021277	Traf3	22031	2672.68	0.702614	0.050037	14.0419	8.63817e-45	2.4242e-43
ENSMUSG00000018583	G3bp1	27041	8995.47	0.560073	0.0399813	14.0084	1.38514e-44	3.88133e-43
ENSMUSG00000031453	Rasa3	19414	6586.91	-0.608816	0.0434735	-14.0043	1.46735e-44	4.10548e-43
ENSMUSG00000050708	Ftl1	14325	516487	0.522389	0.0373387	13.9905	1.78037e-44	4.97374e-43
ENSMUSG00000045679	Pqlc3	217430	1777.73	0.951831	0.0682609	13.944	3.42117e-44	9.54311e-43
ENSMUSG00000027398	Il1b	16176	3655.4	3.19459	0.229116	13.9431	3.46512e-44	9.65111e-43
ENSMUSG00000030082	Sec61a1	53421	9691.88	0.516256	0.0370289	13.942	3.51997e-44	9.78912e-43
ENSMUSG00000051457	Spn	20737	147.664	3.0121	0.216177	13.9335	3.96659e-44	1.10031e-42
ENSMUSG00000078452	Raet1d	56554	189.917	2.30818	0.165658	13.9334	3.96841e-44	1.10031e-42
ENSMUSG00000000278	Scpep1	74617	16092.9	-0.46885	0.0337181	-13.905	5.90861e-44	1.63581e-42
ENSMUSG00000003062	Stard3nl	76205	4496.13	0.537464	0.038665	13.9005	6.28664e-44	1.73786e-42
ENSMUSG00000050777	Tmem37	170706	1678.77	-0.896277	0.0644904	-13.8978	6.52896e-44	1.80215e-42
ENSMUSG00000029762	Akr1b8	14187	1744.88	0.831761	0.0598722	13.8923	7.05615e-44	1.94476e-42
ENSMUSG00000034652	Cd300a	217303	6318	-0.756478	0.0544546	-13.8919	7.09309e-44	1.95203e-42
ENSMUSG00000027506	Tpd52	21985	16765	-0.452525	0.0325798	-13.8897	7.3092e-44	2.00851e-42
ENSMUSG00000021131	Erh	13877	3212.24	0.621002	0.0447376	13.881	8.2622e-44	2.26701e-42
ENSMUSG00000037926	Ssh2	237860	9923.84	-0.701583	0.0505643	-13.8751	8.97004e-44	2.45758e-42
ENSMUSG00000021196	Pfkp	56421	2596.69	0.871425	0.0628323	13.8691	9.75364e-44	2.66831e-42
ENSMUSG00000057137	Tmem140	68487	627.96	-1.17924	0.0851405	-13.8505	1.26256e-43	3.44888e-42
ENSMUSG00000019179	Mdh2	17448	7500.59	0.552147	0.0398657	13.8502	1.26885e-43	3.46095e-42
ENSMUSG00000006800	Sulf2	72043	1869.29	-0.957734	0.069155	-13.8491	1.28842e-43	3.50914e-42
ENSMUSG00000005103	Wdr1	22388	29795	0.536844	0.0387992	13.8365	1.53524e-43	4.16909e-42
ENSMUSG00000030844	Rgs10	67865	3756.26	-0.788985	0.0570218	-13.8365	1.53418e-43	4.16909e-42
ENSMUSG00000026981	Il1rn	16181	438.178	1.92534	0.139234	13.8281	1.72574e-43	4.67267e-42
ENSMUSG00000094248	Hist1h2ao	665433	1093.95	1.46379	0.105856	13.8281	1.72475e-43	4.67267e-42
ENSMUSG00000027496	Aurka	20878	395.173	1.50039	0.108509	13.8273	1.74461e-43	4.71682e-42
ENSMUSG00000094777	Hist1h2ap	319171	1093.89	1.46381	0.105866	13.827	1.75138e-43	4.72821e-42
ENSMUSG00000023055	Calcoco1	67488	2705.77	-0.763211	0.0552119	-13.8233	1.84399e-43	4.97096e-42
ENSMUSG00000041164	Zmiz2	52915	4530.29	0.683167	0.0494321	13.8203	1.92238e-43	5.17473e-42
ENSMUSG00000025393	Atp5b	11947	38562.3	0.449739	0.0325582	13.8134	2.11671e-43	5.68954e-42
ENSMUSG00000001517	Foxm1	14235	532.863	1.57889	0.114326	13.8104	2.20679e-43	5.92305e-42
ENSMUSG00000028873	Cdca8	52276	595.18	1.43895	0.104222	13.8067	2.32348e-43	6.22721e-42
ENSMUSG00000031216	Stard8	236920	7514.41	-0.690427	0.0500232	-13.8021	2.47399e-43	6.62096e-42
ENSMUSG00000047712	Ust	338362	759.553	1.63204	0.118414	13.7825	3.24723e-43	8.67777e-42
ENSMUSG00000022391	Rangap1	19387	2216.67	0.70522	0.0512855	13.7509	5.03177e-43	1.34079e-41
ENSMUSG00000040209	Zfp704	170753	1976.1	-1.13926	0.083009	-13.7245	7.24158e-43	1.92685e-41
ENSMUSG00000006127	Inpp5k	19062	3094.54	-0.728179	0.0530748	-13.7199	7.72137e-43	2.05155e-41
ENSMUSG00000031633	Slc25a4	11739	5203.85	0.560976	0.0408996	13.7159	8.1514e-43	2.1627e-41
ENSMUSG00000080875	Gm7332	654361	876.809	1.08511	0.0792321	13.6953	1.08244e-42	2.86777e-41
ENSMUSG00000087701	Gm13493	606530	14128.3	0.598997	0.0437466	13.6924	1.12652e-42	2.98027e-41
ENSMUSG00000037999	Arap2	212285	3246.43	-0.661415	0.0483064	-13.6921	1.13194e-42	2.99033e-41
ENSMUSG00000023830	Igf2r	16004	812.216	1.34737	0.0984526	13.6855	1.23945e-42	3.26967e-41
ENSMUSG00000060012	Kif13b	16554	3857.85	-0.980045	0.0716178	-13.6844	1.25893e-42	3.31633e-41
ENSMUSG00000021665	Hexb	15212	45510.8	-0.486963	0.0355869	-13.6838	1.26937e-42	3.33905e-41
ENSMUSG00000021559	Dapk1	69635	2706.96	1.05213	0.0769525	13.6724	1.48362e-42	3.89708e-41
ENSMUSG00000025232	Hexa	15211	60010.5	-0.497208	0.0363742	-13.6692	1.54993e-42	4.06549e-41
ENSMUSG00000021427	Ssr1	107513	8304.23	0.491075	0.0360011	13.6405	2.29864e-42	6.02082e-41
ENSMUSG00000037580	Gch1	14528	3116.01	1.28747	0.0944781	13.6272	2.75877e-42	7.21579e-41
ENSMUSG00000049659	Aftph	216549	4581.78	-0.814897	0.0598408	-13.6177	3.14097e-42	8.20385e-41
ENSMUSG00000022108	Itm2b	16432	141474	-0.530084	0.0389498	-13.6094	3.51971e-42	9.18009e-41
ENSMUSG00000026648	Dclre1c	227525	1576.25	-1.19709	0.0879761	-13.607	3.63933e-42	9.47868e-41
ENSMUSG00000028494	Plin2	11520	40708.3	-0.457879	0.0336759	-13.5966	4.19447e-42	1.09092e-40
ENSMUSG00000022353	Mtss1	211401	3464.04	-0.741393	0.0545523	-13.5905	4.55961e-42	1.18421e-40
ENSMUSG00000026437	Cdk18	18557	5720.28	0.61577	0.0453221	13.5866	4.81231e-42	1.24809e-40
ENSMUSG00000016940	Kctd2	70382	1274.29	-0.874796	0.0644224	-13.5791	5.32945e-42	1.38028e-40
ENSMUSG00000040564	Apoc1	11812	1226.86	-1.07108	0.0789452	-13.5674	6.24748e-42	1.61577e-40
ENSMUSG00000019849	Prep	19072	3290.8	0.649375	0.0479174	13.552	7.7145e-42	1.99239e-40
ENSMUSG00000029407	Uso1	56041	5214.3	0.627575	0.0463431	13.5419	8.84321e-42	2.28071e-40
ENSMUSG00000016257	Prelid3b	66390	1736.98	0.774698	0.0572386	13.5345	9.77971e-42	2.51872e-40
ENSMUSG00000022884	Eif4a2	13682	3879.72	-0.684576	0.0507259	-13.4956	1.66042e-41	4.27038e-40
ENSMUSG00000030512	Snrpa1	68981	1316.99	0.960861	0.0712036	13.4946	1.68374e-41	4.32433e-40
ENSMUSG00000038286	Bphl	68021	989.068	-0.882494	0.0653992	-13.494	1.69746e-41	4.35352e-40
ENSMUSG00000074336	Apoc4	11425	139.789	-2.92306	0.216651	-13.492	1.74277e-41	4.46353e-40
ENSMUSG00000021838	Samd4	74480	291.532	-1.87806	0.139205	-13.4914	1.75738e-41	4.49471e-40
ENSMUSG00000005043	Sgsh	27029	2343.09	-0.967914	0.0718008	-13.4805	2.03602e-41	5.20015e-40
ENSMUSG00000064120	Mocs1	56738	1088.88	1.14107	0.0846877	13.4739	2.22861e-41	5.6842e-40
ENSMUSG00000006057	Atp5g1	11951	3304.85	0.750382	0.0557184	13.4674	2.43275e-41	6.19629e-40
ENSMUSG00000034437	Gm9761	100043705	1155.16	0.993058	0.0737743	13.4607	2.66203e-41	6.77095e-40
ENSMUSG00000020388	Pdlim4	30794	4757.57	0.625993	0.046515	13.4579	2.76713e-41	7.02859e-40
ENSMUSG00000052160	Pld4	104759	24627.2	-0.409266	0.0304145	-13.4563	2.82737e-41	7.17173e-40
ENSMUSG00000020184	Mdm2	17246	7626.44	0.429788	0.031947	13.4532	2.95021e-41	7.47305e-40
ENSMUSG00000032301	Psma4	26441	3801.07	0.624569	0.0464352	13.4503	3.06486e-41	7.75284e-40
ENSMUSG00000071072	Ptges3	56351	5262.43	0.528199	0.039342	13.4258	4.26724e-41	1.07796e-39
ENSMUSG00000017760	Ctsa	19025	93934.5	-0.398045	0.0296537	-13.4231	4.42758e-41	1.11693e-39
ENSMUSG00000028522	Mier1	71148	2540.8	-0.768442	0.0572575	-13.4208	4.56705e-41	1.15055e-39
ENSMUSG00000007080	Pole	18973	305.886	2.04592	0.152512	13.4148	4.95379e-41	1.24628e-39
ENSMUSG00000032218	Ccnb2	12442	610.314	1.41016	0.105235	13.4001	6.03663e-41	1.51663e-39
ENSMUSG00000007458	M6pr	17113	20935.4	0.521609	0.0389485	13.3923	6.70885e-41	1.68323e-39
ENSMUSG00000032369	Plscr1	22038	1226.95	0.868825	0.064892	13.3888	7.03297e-41	1.76216e-39
ENSMUSG00000039713	Plekhg5	269608	361.303	-1.6061	0.119963	-13.3883	7.0821e-41	1.77206e-39
ENSMUSG00000029163	Emilin1	100952	1781.01	0.850896	0.0635862	13.3818	7.72759e-41	1.93096e-39
ENSMUSG00000015217	Hmgb3	15354	289.898	1.7133	0.128231	13.3611	1.02084e-40	2.54396e-39
ENSMUSG00000071715	Ncf4	17972	7412.47	0.644892	0.0483143	13.3479	1.21886e-40	3.03334e-39
ENSMUSG00000022234	Cct5	12465	8133.75	0.472991	0.035437	13.3474	1.22658e-40	3.04845e-39
ENSMUSG00000025934	Gsta3	14859	143.866	3.27549	0.245597	13.3369	1.41287e-40	3.50674e-39
ENSMUSG00000037661	Gpr160	71862	806.858	-1.24826	0.093621	-13.3332	1.48479e-40	3.68029e-39
ENSMUSG00000034957	Cebpa	12606	4820.85	-1.06192	0.0796922	-13.3252	1.65117e-40	4.08719e-39
ENSMUSG00000021824	Ap3m1	55946	4373.52	0.601016	0.0451322	13.3168	1.84903e-40	4.57084e-39
ENSMUSG00000027566	Psma7	26444	5845.42	0.643212	0.0483169	13.3124	1.96203e-40	4.84369e-39
ENSMUSG00000068798	Rap1a	109905	6307.18	0.467905	0.0351549	13.3098	2.03046e-40	5.00594e-39
ENSMUSG00000083282	Ctsf	56464	2666.98	-0.702628	0.0528024	-13.3067	2.11518e-40	5.20786e-39
ENSMUSG00000032300	1700017B05Rik	74211	3803.49	-0.7617	0.0573247	-13.2875	2.73748e-40	6.73106e-39
ENSMUSG00000030878	Cdr2	12585	453.321	1.51776	0.114324	13.276	3.19134e-40	7.8366e-39
ENSMUSG00000029304	Spp1	20750	644179	-0.69469	0.0523909	-13.2598	3.96146e-40	9.71478e-39
ENSMUSG00000034707	Gns	75612	39841.6	-0.487791	0.0368019	-13.2545	4.24858e-40	1.04051e-38
ENSMUSG00000036438	Calm2	12314	19341.9	-0.535779	0.0404232	-13.2543	4.26325e-40	1.04272e-38
ENSMUSG00000053411	Cbx7	52609	467.282	-1.37414	0.103721	-13.2485	4.60486e-40	1.12478e-38
ENSMUSG00000029447	Cct6a	12466	6864.77	0.595265	0.0449654	13.2383	5.27289e-40	1.28625e-38
ENSMUSG00000041685	Fcho2	218503	8388.28	-0.5962	0.0450536	-13.2331	5.64943e-40	1.37628e-38
ENSMUSG00000017861	Mybl2	17865	197.594	2.50281	0.189239	13.2257	6.23865e-40	1.51783e-38
ENSMUSG00000018217	Pmp22	18858	28660.3	-0.597268	0.0452021	-13.2133	7.35557e-40	1.78721e-38
ENSMUSG00000017466	Timp2	21858	44066.5	-0.517904	0.039206	-13.2098	7.70182e-40	1.86888e-38
ENSMUSG00000007041	Clic1	114584	15499.4	0.429603	0.0325322	13.2054	8.16197e-40	1.97794e-38
ENSMUSG00000040675	Mthfd1l	270685	287.366	1.99264	0.151111	13.1865	1.04887e-39	2.53846e-38
ENSMUSG00000028613	Lrp8	16975	544.9	1.94444	0.147653	13.169	1.32316e-39	3.19811e-38
ENSMUSG00000006360	Crip1	12925	2013.22	0.953319	0.0724782	13.1532	1.63145e-39	3.93809e-38
ENSMUSG00000040613	Apobec1	11810	20030	-0.486587	0.0370651	-13.1279	2.27889e-39	5.49372e-38
ENSMUSG00000006589	Aprt	11821	3698.61	0.646082	0.0492157	13.1276	2.28928e-39	5.51158e-38
ENSMUSG00000021703	Serinc5	218442	1655.21	-0.839503	0.0639695	-13.1235	2.4155e-39	5.8079e-38
ENSMUSG00000027828	Ssr3	67437	9715.58	0.567715	0.0433267	13.1031	3.15949e-39	7.58688e-38
ENSMUSG00000027848	Olfml3	99543	2116.02	-0.909158	0.0694113	-13.0981	3.37441e-39	8.09245e-38
ENSMUSG00000056201	Cfl1	12631	38211.2	0.54876	0.0419046	13.0955	3.49558e-39	8.37216e-38
ENSMUSG00000027219	Slc28a2	269346	289.943	1.98211	0.15154	13.0798	4.2941e-39	1.02713e-37
ENSMUSG00000024772	Ehd1	13660	23908.9	0.866596	0.0662998	13.0709	4.83142e-39	1.15417e-37
ENSMUSG00000055681	Cope	59042	5968.93	0.44951	0.0344113	13.0629	5.36594e-39	1.2802e-37
ENSMUSG00000059552	Trp53	22059	2715.2	0.573169	0.0438852	13.0607	5.52484e-39	1.31641e-37
ENSMUSG00000027200	Sema6d	214968	284.947	-1.64438	0.126113	-13.039	7.34226e-39	1.74719e-37
ENSMUSG00000022667	Cd200r1	57781	4525.5	-0.53844	0.0413012	-13.0369	7.54401e-39	1.79289e-37
ENSMUSG00000026766	Mmadhc	109129	2079.07	0.631929	0.0484734	13.0366	7.57527e-39	1.7957e-37
ENSMUSG00000062078	Qk	19317	29913	-0.55816	0.0428146	-13.0367	7.5683e-39	1.7957e-37
ENSMUSG00000005054	Cstb	13014	27361.8	0.518338	0.0397833	13.029	8.36592e-39	1.98058e-37
ENSMUSG00000020897	Aurkb	20877	520.728	1.46879	0.112843	13.0162	9.90248e-39	2.34135e-37
ENSMUSG00000039232	Stx11	74732	683.409	1.68124	0.129182	13.0145	1.01193e-38	2.38955e-37
ENSMUSG00000060791	Gmfg	63986	1618.97	0.935601	0.0719429	13.0048	1.14933e-38	2.71054e-37
ENSMUSG00000070737	Tmem35b	100039968	929.625	-0.990016	0.0761307	-13.0042	1.15858e-38	2.72888e-37
ENSMUSG00000031530	Dusp4	319520	616.646	1.64299	0.126365	13.0019	1.19281e-38	2.80593e-37
ENSMUSG00000019942	Cdk1	12534	1189.31	0.975048	0.0749997	13.0007	1.21259e-38	2.84881e-37
ENSMUSG00000020644	Id2	15902	10387.8	0.495126	0.0381296	12.9854	1.48143e-38	3.476e-37
ENSMUSG00000044206	Vsig4	278180	230.188	-1.91511	0.147542	-12.9801	1.58743e-38	3.71998e-37
ENSMUSG00000022557	Bop1	12181	2272.03	0.688161	0.0531468	12.9483	2.40172e-38	5.62107e-37
ENSMUSG00000074212	Dnajb14	70604	4266.1	-0.711598	0.0549627	-12.9469	2.44591e-38	5.71724e-37
ENSMUSG00000030064	Frmd4b	232288	7618.43	-0.635082	0.0490886	-12.9375	2.76658e-38	6.45862e-37
ENSMUSG00000025351	Cd63	12512	54892	-0.386367	0.0298824	-12.9296	3.065e-38	7.14626e-37
ENSMUSG00000035049	Rrp12	107094	686.891	1.19382	0.0925894	12.8937	4.88404e-38	1.13731e-36
ENSMUSG00000094627	Gm10182	100041826	1477.96	0.813085	0.0631172	12.8821	5.67466e-38	1.31975e-36
ENSMUSG00000053398	Phgdh	236539	852.12	1.10229	0.0855912	12.8785	5.94761e-38	1.38149e-36
ENSMUSG00000002603	Tgfb1	21803	10616.7	0.615784	0.0478389	12.872	6.46768e-38	1.5004e-36
ENSMUSG00000041773	Enc1	13803	453.202	-1.94442	0.151184	-12.8613	7.43273e-38	1.72212e-36
ENSMUSG00000043664	Tmem221	434325	2143.46	-0.847353	0.0659013	-12.8579	7.76587e-38	1.79705e-36
ENSMUSG00000018770	Atp5g3	228033	5390.38	0.501995	0.0390476	12.856	7.96122e-38	1.83995e-36
ENSMUSG00000005800	Mmp8	17394	638.877	-1.45165	0.112957	-12.8513	8.45236e-38	1.95102e-36
ENSMUSG00000018459	Slc13a3	114644	809.783	4.33	0.336982	12.8493	8.67574e-38	2.00008e-36
ENSMUSG00000029064	Gnb1	14688	19761.7	0.42992	0.0335005	12.8332	1.06799e-37	2.45905e-36
ENSMUSG00000029363	Rfc5	72151	1123.43	0.852112	0.0664784	12.8179	1.30214e-37	2.99444e-36
ENSMUSG00000053007	Creb5	231991	460.114	1.94166	0.151497	12.8165	1.32592e-37	3.04533e-36
ENSMUSG00000034858	Fam214a	235493	1327.23	-1.57193	0.122677	-12.8135	1.37745e-37	3.15974e-36
ENSMUSG00000027035	Cers6	241447	8043.91	0.747671	0.0583589	12.8116	1.41169e-37	3.23427e-36
ENSMUSG00000035778	Ggta1	14594	5391.86	-0.766632	0.0598581	-12.8075	1.48847e-37	3.40596e-36
ENSMUSG00000049339	Retreg2	227298	6125.35	-0.465523	0.0363566	-12.8044	1.54991e-37	3.54215e-36
ENSMUSG00000097415	AU020206	100504230	468.64	-1.24251	0.0970534	-12.8023	1.59123e-37	3.63209e-36
ENSMUSG00000028832	Stmn1	16765	2854.76	0.66561	0.0520352	12.7915	1.82824e-37	4.16794e-36
ENSMUSG00000023827	Agpat4	68262	557.812	1.13084	0.0884657	12.7829	2.04433e-37	4.65481e-36
ENSMUSG00000024660	Incenp	16319	2799.59	0.644646	0.0504543	12.7768	2.20924e-37	5.02411e-36
ENSMUSG00000052698	Tln2	70549	2531.16	-1.09525	0.0858885	-12.752	3.03707e-37	6.89823e-36
ENSMUSG00000018500	Adora2b	11541	180.466	3.03215	0.23796	12.7423	3.44185e-37	7.808e-36
ENSMUSG00000028312	Smc2	14211	930.234	1.05047	0.0824935	12.734	3.82883e-37	8.67523e-36
ENSMUSG00000039031	Arhgap18	73910	3859.75	-0.776017	0.0610152	-12.7184	4.67148e-37	1.05715e-35
ENSMUSG00000026600	Soat1	20652	23274.1	-0.501894	0.0394757	-12.714	4.9438e-37	1.11741e-35
ENSMUSG00000020189	Osbpl8	237542	24739.6	-0.701533	0.0551786	-12.7139	4.95302e-37	1.11812e-35
ENSMUSG00000074607	Tox2	269389	734.15	-1.14736	0.090495	-12.6787	7.75811e-37	1.74922e-35
ENSMUSG00000022193	Psmb5	19173	2574.88	0.822993	0.0649388	12.6734	8.30686e-37	1.87066e-35
ENSMUSG00000002881	Nab1	17936	6391.18	0.745683	0.0589532	12.6487	1.13695e-36	2.55723e-35
ENSMUSG00000067017	Gm3608	100041985	12242.6	0.508491	0.0402024	12.6483	1.14343e-36	2.56869e-35
ENSMUSG00000028076	Cd1d1	12479	363.678	1.57604	0.124612	12.6476	1.15387e-36	2.58899e-35
ENSMUSG00000009013	Dynll1	56455	4474.11	0.615105	0.0486528	12.6428	1.22679e-36	2.74927e-35
ENSMUSG00000075053	Vdac3-ps1	22336	2192.64	0.645904	0.0510969	12.6408	1.25809e-36	2.81598e-35
ENSMUSG00000019970	Sgk1	20393	13060.1	0.515187	0.040796	12.6284	1.4731e-36	3.29325e-35
ENSMUSG00000024187	Fam234a	106581	13593.7	-0.593353	0.0470692	-12.606	1.95776e-36	4.37147e-35
ENSMUSG00000013698	Pea15a	18611	26790.9	0.431275	0.0342157	12.6046	1.99192e-36	4.44236e-35
ENSMUSG00000045636	Mtus1	102103	2541.24	-0.736672	0.0584505	-12.6034	2.02359e-36	4.50756e-35
ENSMUSG00000011148	Adssl1	11565	4716.5	-0.892689	0.0708827	-12.5939	2.28166e-36	5.07629e-35
ENSMUSG00000046179	E2f8	108961	221.286	1.97778	0.157358	12.5687	3.13838e-36	6.97394e-35
ENSMUSG00000030007	Cct7	12468	8631.03	0.468322	0.0372824	12.5615	3.43938e-36	7.63361e-35
ENSMUSG00000024121	Atp6v0c	11984	49748.7	0.391687	0.0312198	12.5461	4.1755e-36	9.25627e-35
ENSMUSG00000057329	Bcl2	12043	870.237	0.930619	0.0742076	12.5408	4.46733e-36	9.89134e-35
ENSMUSG00000035891	Cerk	223753	15640.8	-0.650013	0.0518885	-12.5271	5.30546e-36	1.1733e-34
ENSMUSG00000019055	Plod1	18822	9439.77	-0.410034	0.0328146	-12.4955	7.90099e-36	1.74521e-34
ENSMUSG00000022971	Ifnar2	15976	5662.13	-0.516431	0.0413405	-12.4921	8.2421e-36	1.81838e-34
ENSMUSG00000056888	Glipr1	73690	3904.14	0.663815	0.0531531	12.4887	8.60133e-36	1.89537e-34
ENSMUSG00000006304	Arpc2	76709	32149	0.359203	0.0287747	12.4833	9.20866e-36	2.02678e-34
ENSMUSG00000005610	Eif4g2	13690	57272.1	0.554224	0.0444121	12.4791	9.70468e-36	2.13341e-34
ENSMUSG00000041075	Fzd7	14369	2788.15	-0.824326	0.0660845	-12.4738	1.03748e-35	2.27802e-34
ENSMUSG00000013629	Cad	69719	1246.88	0.931087	0.0746606	12.4709	1.07564e-35	2.359e-34
ENSMUSG00000020432	Tcn2	21452	12251.7	-0.490559	0.0393366	-12.4708	1.07727e-35	2.35976e-34
ENSMUSG00000025190	Got1	14718	3715.78	-0.698146	0.0560075	-12.4652	1.15553e-35	2.52821e-34
ENSMUSG00000035198	Tubg1	103733	1354.4	0.915184	0.0736117	12.4326	1.7389e-35	3.80007e-34
ENSMUSG00000031591	Asah1	11886	31084.8	-0.425024	0.0341931	-12.4301	1.79347e-35	3.91467e-34
ENSMUSG00000035629	Rubcn	100502698	3944.72	-0.704628	0.0567276	-12.4212	2.00428e-35	4.36967e-34
ENSMUSG00000000787	Ddx3x	13205	12236	-0.451389	0.036366	-12.4124	2.23809e-35	4.87365e-34
ENSMUSG00000024766	Lipo3	381236	2083.32	0.662936	0.0534291	12.4078	2.37133e-35	5.15771e-34
ENSMUSG00000038412	Higd1a	56295	945.592	1.0159	0.0819105	12.4026	2.53037e-35	5.49714e-34
ENSMUSG00000019838	Slc16a10	72472	3190.07	0.709354	0.0572163	12.3978	2.68758e-35	5.83183e-34
ENSMUSG00000051185	Fam174a	67698	4765.9	-0.465083	0.0375443	-12.3876	3.05112e-35	6.61291e-34
ENSMUSG00000026034	Clk1	12747	3768.8	-0.871608	0.0703999	-12.3808	3.31914e-35	7.18537e-34
ENSMUSG00000033213	AA467197	433470	111.031	3.02283	0.244289	12.374	3.61259e-35	7.81149e-34
ENSMUSG00000012519	Mlkl	74568	827.788	1.5887	0.128466	12.3667	3.95738e-35	8.54701e-34
ENSMUSG00000072946	Ptgr2	77219	3577.01	-0.550345	0.0445165	-12.3627	4.15855e-35	8.97101e-34
ENSMUSG00000027699	Ect2	13605	566.332	1.25989	0.101964	12.3562	4.50835e-35	9.71426e-34
ENSMUSG00000027203	Dut	110074	285.477	1.64521	0.133217	12.3499	4.87851e-35	1.04996e-33
ENSMUSG00000035352	Ccl12	20293	1720.15	3.31935	0.268901	12.3441	5.23885e-35	1.1262e-33
ENSMUSG00000036585	Fgf1	14164	141.39	-2.64615	0.214508	-12.3359	5.80488e-35	1.24643e-33
ENSMUSG00000032487	Ptgs2	19225	482.772	2.11196	0.171387	12.3228	6.83068e-35	1.46499e-33
ENSMUSG00000028702	Rad54l	19366	347.956	1.55333	0.12612	12.3162	7.40776e-35	1.58691e-33
ENSMUSG00000091478	Gm10039	100041835	1228.92	0.835172	0.0678767	12.3042	8.59332e-35	1.83875e-33
ENSMUSG00000058050	Gm9234	668548	4189.39	0.625072	0.0508216	12.2993	9.13233e-35	1.95182e-33
ENSMUSG00000020629	Adi1	104923	3033.87	-0.596469	0.0485071	-12.2965	9.45622e-35	2.01871e-33
ENSMUSG00000004552	Ctse	13034	236.503	-1.842	0.149842	-12.293	9.87617e-35	2.1035e-33
ENSMUSG00000030835	Nomo1	211548	3074.33	0.771997	0.0627994	12.2931	9.86937e-35	2.1035e-33
ENSMUSG00000005125	Ndrg1	17988	718.852	-1.22865	0.0999773	-12.2893	1.03422e-34	2.20022e-33
ENSMUSG00000001891	Ugp2	216558	5414.71	0.435603	0.035473	12.2798	1.16217e-34	2.46957e-33
ENSMUSG00000020788	Atp2a3	53313	500.465	1.69651	0.138192	12.2765	1.21173e-34	2.57193e-33
ENSMUSG00000021690	Jmy	57748	338.854	-1.3313	0.108568	-12.2624	1.44182e-34	3.05679e-33
ENSMUSG00000025911	Adhfe1	76187	370.651	1.72113	0.14047	12.2526	1.62726e-34	3.44599e-33
ENSMUSG00000039470	Zdhhc2	70546	587.263	1.3484	0.110059	12.2516	1.64623e-34	3.48216e-33
ENSMUSG00000036103	Colec12	140792	43847.9	-0.513978	0.0419549	-12.2507	1.66486e-34	3.51754e-33
ENSMUSG00000063412	Gm10131	100042777	1905.88	0.625338	0.0510475	12.2501	1.67754e-34	3.54029e-33
ENSMUSG00000004707	Ly9	17085	3798.05	0.556583	0.0455091	12.2301	2.14546e-34	4.52261e-33
ENSMUSG00000029098	Acox3	80911	5896.95	-0.604809	0.049484	-12.2223	2.36245e-34	4.97435e-33
ENSMUSG00000015846	Rxra	20181	7886.3	-0.593013	0.0485465	-12.2154	2.57355e-34	5.41266e-33
ENSMUSG00000014226	Cacybp	12301	3858.01	0.527534	0.0433181	12.1782	4.06395e-34	8.53752e-33
ENSMUSG00000026932	Nacc2	67991	3299.35	-0.512268	0.0420924	-12.1701	4.48699e-34	9.40485e-33
ENSMUSG00000037503	Fam168b	214469	13152.3	-0.462877	0.038034	-12.1701	4.4868e-34	9.40485e-33
ENSMUSG00000038776	Ephx1	13849	2485.44	-0.582754	0.0479027	-12.1654	4.7523e-34	9.94965e-33
ENSMUSG00000021771	Vdac2	22334	9964.45	0.479032	0.0393945	12.1599	5.08378e-34	1.06316e-32
ENSMUSG00000029919	Hpgds	54486	9601.21	-0.616928	0.0507361	-12.1596	5.10367e-34	1.06611e-32
ENSMUSG00000038267	Slc22a23	73102	313.501	-1.52595	0.125764	-12.1334	7.02776e-34	1.46638e-32
ENSMUSG00000032279	Idh3a	67834	2180.55	0.764326	0.0630267	12.127	7.59645e-34	1.58325e-32
ENSMUSG00000026791	Slc2a8	56017	1376.2	-0.880704	0.0726877	-12.1163	8.6617e-34	1.80323e-32
ENSMUSG00000018286	Psmb6	19175	9888.57	0.512423	0.0423048	12.1126	9.05388e-34	1.88276e-32
ENSMUSG00000052102	Gnpda1	26384	7520.77	-0.630876	0.0520902	-12.1112	9.21032e-34	1.91314e-32
ENSMUSG00000032691	Nlrp3	216799	3137.58	1.06699	0.0881128	12.1093	9.42564e-34	1.95566e-32
ENSMUSG00000031740	Mmp2	17390	438.468	1.3674	0.112962	12.105	9.93817e-34	2.05969e-32
ENSMUSG00000051220	Ercc6l	236930	282.435	1.68868	0.139532	12.1024	1.02519e-33	2.12232e-32
ENSMUSG00000000028	Cdc45	12544	266.345	1.88319	0.155635	12.1	1.0558e-33	2.18324e-32
ENSMUSG00000022842	Ece2	107522	703.578	1.01883	0.0842035	12.0996	1.06075e-33	2.19104e-32
ENSMUSG00000029254	Stap1	56792	2225.68	0.772115	0.0638398	12.0946	1.12827e-33	2.32789e-32
ENSMUSG00000056394	Lig1	16881	1265.46	1.12732	0.0932186	12.0933	1.14618e-33	2.36221e-32
ENSMUSG00000021709	Erbin	59079	10319.3	-0.577611	0.0477685	-12.0919	1.16569e-33	2.39974e-32
ENSMUSG00000021775	Nr1d2	353187	3064.35	-0.799624	0.0661729	-12.0839	1.28545e-33	2.64333e-32
ENSMUSG00000024222	Fkbp5	14229	1272.86	1.40845	0.116618	12.0775	1.38946e-33	2.85404e-32
ENSMUSG00000038127	Ccdc50	67501	13103.4	0.597966	0.0495163	12.0762	1.41171e-33	2.89652e-32
ENSMUSG00000060073	Psma3	19167	6256.66	0.492737	0.040849	12.0624	1.6685e-33	3.41959e-32
ENSMUSG00000025935	Tram1	72265	17437.2	0.475489	0.0394231	12.0612	1.69353e-33	3.46703e-32
ENSMUSG00000028614	Ndc1	72787	1762.53	0.75293	0.0624719	12.0523	1.88592e-33	3.85663e-32
ENSMUSG00000028718	Stil	20460	241.09	1.60913	0.133544	12.0494	1.95338e-33	3.99017e-32
ENSMUSG00000001763	Tspan33	232670	862.288	-0.902628	0.0749468	-12.0436	2.09647e-33	4.27772e-32
ENSMUSG00000025747	Tyms	22171	504.749	1.3917	0.115593	12.0397	2.19806e-33	4.48005e-32
ENSMUSG00000063856	Gpx1	14775	14507	0.529601	0.0439884	12.0396	2.2009e-33	4.4809e-32
ENSMUSG00000036777	Anln	68743	618.389	1.64982	0.137044	12.0386	2.22801e-33	4.5311e-32
ENSMUSG00000038151	Prdm1	12142	2708.61	-0.840982	0.069866	-12.0371	2.2686e-33	4.60858e-32
ENSMUSG00000032038	St3gal4	20443	1097.18	-0.789482	0.0656311	-12.0291	2.49891e-33	5.0653e-32
ENSMUSG00000009863	Sdhb	67680	5805.92	0.41451	0.0344729	12.0242	2.65053e-33	5.36675e-32
ENSMUSG00000020260	Pofut2	80294	4118.3	0.572068	0.0475928	12.0201	2.78798e-33	5.63886e-32
ENSMUSG00000020422	Tns3	319939	5088.23	-0.834246	0.0694249	-12.0165	2.90912e-33	5.87744e-32
ENSMUSG00000047879	Usp14	59025	5020.26	0.539845	0.0449888	11.9995	3.57287e-33	7.21055e-32
ENSMUSG00000054079	Utp18	217109	1223.81	0.746121	0.0622524	11.9854	4.23677e-33	8.54107e-32
ENSMUSG00000027303	Ptpra	19262	20494.9	-0.458765	0.0383194	-11.9721	4.97356e-33	1.00155e-31
ENSMUSG00000032397	Tipin	66131	707	0.964933	0.0806109	11.9703	5.08671e-33	1.02321e-31
ENSMUSG00000002068	Ccne1	12447	233.01	2.26575	0.189449	11.9597	5.77828e-33	1.16106e-31
ENSMUSG00000079197	Psme2	19188	8834.44	0.682885	0.0571817	11.9424	7.11753e-33	1.42861e-31
ENSMUSG00000082896	Gm5844	545508	1352.5	0.716102	0.0599653	11.9419	7.15423e-33	1.43442e-31
ENSMUSG00000024056	Ndc80	67052	323.133	1.30718	0.109475	11.9405	7.27748e-33	1.45755e-31
ENSMUSG00000020818	Mfsd11	69900	5969.05	-0.628239	0.0526171	-11.9398	7.33695e-33	1.46787e-31
ENSMUSG00000026342	Slc35f5	74150	3712.43	-0.522759	0.0437857	-11.939	7.4078e-33	1.48044e-31
ENSMUSG00000040133	Gpr176	381413	392.515	-1.27931	0.107211	-11.9326	8.00595e-33	1.59825e-31
ENSMUSG00000030786	Itgam	16409	39042.7	0.520882	0.0436707	11.9275	8.51082e-33	1.6972e-31
ENSMUSG00000004849	Ap1s1	11769	3969.44	0.570716	0.0478732	11.9214	9.15305e-33	1.8233e-31
ENSMUSG00000059089	Fcgr4	246256	1405.02	-1.00843	0.0846499	-11.9129	1.01363e-32	2.017e-31
ENSMUSG00000054342	Kcnn4	16534	2122.3	0.859534	0.0721923	11.9062	1.09906e-32	2.18462e-31
ENSMUSG00000044350	Lacc1	210808	3803.74	0.962731	0.0808643	11.9055	1.10781e-32	2.19966e-31
ENSMUSG00000036565	Ttyh3	78339	6185.04	-0.620115	0.0520906	-11.9045	1.12079e-32	2.22305e-31
ENSMUSG00000061666	Gdpd1	66569	4190.9	0.465351	0.0391126	11.8977	1.21596e-32	2.40922e-31
ENSMUSG00000022678	Nde1	67203	2333.14	0.601363	0.0505737	11.8908	1.32091e-32	2.61435e-31
ENSMUSG00000073131	Vma21	67048	2679.7	0.587206	0.0493931	11.8884	1.35949e-32	2.68782e-31
ENSMUSG00000026229	Psmd1	70247	9355.03	0.500993	0.0421641	11.882	1.46856e-32	2.90036e-31
ENSMUSG00000031379	Pir	69656	142.987	2.39713	0.202399	11.8436	2.32333e-32	4.58362e-31
ENSMUSG00000036138	Acaa1a	113868	6293.82	0.684212	0.0578077	11.836	2.54284e-32	5.01133e-31
ENSMUSG00000042747	Krtcap2	66059	2814.08	0.636435	0.0538494	11.8188	3.12148e-32	6.14511e-31
ENSMUSG00000059883	Irak4	266632	1370.52	-0.684683	0.0579402	-11.8171	3.18647e-32	6.26638e-31
ENSMUSG00000045287	Rtn4rl1	237847	958.719	-1.19683	0.101286	-11.8164	3.21277e-32	6.31138e-31
ENSMUSG00000043004	Gng2	14702	5188.43	-0.520497	0.0440495	-11.8162	3.2198e-32	6.31847e-31
ENSMUSG00000017119	Nbr1	17966	9405.87	-0.560608	0.0474484	-11.8151	3.26129e-32	6.39309e-31
ENSMUSG00000028837	Psmb2	26445	4989.6	0.515368	0.043625	11.8136	3.32102e-32	6.50328e-31
ENSMUSG00000025154	Arhgap19	71085	9015.81	-1.47388	0.124859	-11.8043	3.70655e-32	7.25055e-31
ENSMUSG00000037235	Mxd4	17122	1635.04	-0.617516	0.0523592	-11.7938	4.19985e-32	8.20682e-31
ENSMUSG00000048222	Mfap1b	100034361	4310.76	-0.576577	0.048901	-11.7907	4.35886e-32	8.50854e-31
ENSMUSG00000054932	Afp	11576	145.214	2.35317	0.199808	11.7772	5.11675e-32	9.97739e-31
ENSMUSG00000019951	Uhrf1bp1l	75089	6411.84	-0.535667	0.0454918	-11.775	5.24908e-32	1.02246e-30
ENSMUSG00000020100	Slc29a3	71279	7669.89	-0.622915	0.052903	-11.7747	5.2719e-32	1.02583e-30
ENSMUSG00000068749	Psma5	26442	4610.08	0.538436	0.0457736	11.763	6.05297e-32	1.17533e-30
ENSMUSG00000037960	Card19	68480	4753.84	0.516842	0.0439541	11.7587	6.373e-32	1.23617e-30
ENSMUSG00000024725	Ostf1	20409	10147.1	0.366164	0.0311626	11.7501	7.05312e-32	1.36666e-30
ENSMUSG00000032565	Nudt16	75686	1121.17	-0.870302	0.0741922	-11.7304	8.90655e-32	1.72399e-30
ENSMUSG00000029910	Mad2l1	56150	697.752	1.1961	0.101984	11.7283	9.12887e-32	1.76517e-30
ENSMUSG00000019528	Gyg	27357	6025.9	-0.597529	0.050953	-11.7271	9.26172e-32	1.78898e-30
ENSMUSG00000039067	Psmd7	17463	4750.37	0.523553	0.044647	11.7265	9.32472e-32	1.79927e-30
ENSMUSG00000036896	C1qc	12262	96736.6	-0.443044	0.0377931	-11.7229	9.73204e-32	1.87591e-30
ENSMUSG00000021250	Fos	14281	1473.82	0.980493	0.0836902	11.7157	1.05851e-31	2.03821e-30
ENSMUSG00000030315	Vgll4	232334	1035.77	-0.775877	0.0662698	-11.7078	1.16202e-31	2.2352e-30
ENSMUSG00000034330	Plcg2	234779	7443.17	0.493226	0.0421327	11.7065	1.18065e-31	2.26866e-30
ENSMUSG00000029767	Calu	12321	10065	0.649754	0.0555396	11.6989	1.29058e-31	2.47733e-30
ENSMUSG00000022641	Bbx	70508	3235.31	-0.618296	0.0528733	-11.6939	1.36919e-31	2.62549e-30
ENSMUSG00000031149	Praf2	54637	705.807	0.971638	0.0830975	11.6928	1.38807e-31	2.65892e-30
ENSMUSG00000028041	Adam15	11490	10489.9	0.604488	0.051729	11.6857	1.50878e-31	2.88716e-30
ENSMUSG00000085148	Mir22hg	100042498	1495.28	0.752268	0.0644108	11.6792	1.62785e-31	3.11179e-30
ENSMUSG00000018931	Natd1	24083	2623.42	-0.734041	0.0628643	-11.6766	1.6789e-31	3.20605e-30
ENSMUSG00000029552	Tes	21753	3719.78	0.626596	0.0536657	11.6759	1.69237e-31	3.22843e-30
ENSMUSG00000097989	Gm4335	100043283	350.036	1.20745	0.103418	11.6755	1.70149e-31	3.24248e-30
ENSMUSG00000026554	Dcaf8	98193	4969.6	-0.554043	0.0474571	-11.6746	1.71849e-31	3.27151e-30
ENSMUSG00000068479	Mfap1a	67532	4564.14	-0.586433	0.050237	-11.6733	1.74463e-31	3.31785e-30
ENSMUSG00000017057	Il13ra1	16164	4319.11	0.712079	0.0610701	11.66	2.04006e-31	3.8757e-30
ENSMUSG00000034354	Mtmr3	74302	8491.64	-0.427838	0.0367042	-11.6564	2.12904e-31	4.04059e-30
ENSMUSG00000078429	Ctdsp2	52468	3586.55	-0.782415	0.0671598	-11.6501	2.29295e-31	4.34719e-30
ENSMUSG00000028937	Acot7	70025	380.421	1.36358	0.117282	11.6264	3.02416e-31	5.7276e-30
ENSMUSG00000029060	Mib2	76580	2667.82	-0.783468	0.0674499	-11.6155	3.43608e-31	6.5011e-30
ENSMUSG00000054766	Set	56086	7636.83	0.506282	0.0436265	11.6049	3.89044e-31	7.35322e-30
ENSMUSG00000018796	Acsl1	14081	3672.78	0.709867	0.0612463	11.5904	4.61243e-31	8.70891e-30
ENSMUSG00000086922	Gm13835	100038973	2038.37	0.60633	0.0523375	11.585	4.90939e-31	9.26015e-30
ENSMUSG00000032966	Fkbp1a	14225	8433.19	0.387108	0.0334173	11.5841	4.964e-31	9.3536e-30
ENSMUSG00000021048	Mthfd1	108156	1804.17	0.685725	0.0592121	11.5808	5.15414e-31	9.70197e-30
ENSMUSG00000027490	E2f1	13555	1748.64	0.678291	0.0586156	11.5719	5.72335e-31	1.07625e-29
ENSMUSG00000012640	Zfp715	69930	2339.5	-0.608585	0.0526255	-11.5645	6.23882e-31	1.17079e-29
ENSMUSG00000025059	Gk	14933	2228.31	0.616703	0.0533347	11.5629	6.35359e-31	1.19112e-29
ENSMUSG00000028560	Usp1	230484	1466.37	0.667486	0.0577328	11.5616	6.44672e-31	1.20735e-29
ENSMUSG00000029385	Ccng2	12452	3678.22	-0.740858	0.0641748	-11.5444	7.88216e-31	1.47469e-29
ENSMUSG00000038370	Pcp4l1	66425	294.046	-1.84606	0.15996	-11.5407	8.22126e-31	1.53658e-29
ENSMUSG00000027397	Slc20a1	20515	1105.97	1.04448	0.0905093	11.54	8.29494e-31	1.54878e-29
ENSMUSG00000038371	Sbf2	319934	8889.47	-0.511446	0.04432	-11.5399	8.30649e-31	1.54937e-29
ENSMUSG00000032870	Smap2	69780	4121.39	-0.445268	0.0385996	-11.5355	8.73323e-31	1.62732e-29
ENSMUSG00000091421	Gm4202	100418460	7449.9	0.410792	0.0356141	11.5345	8.83568e-31	1.64475e-29
ENSMUSG00000035373	Ccl7	20306	574.889	3.24227	0.281178	11.531	9.20251e-31	1.71131e-29
ENSMUSG00000046329	Slc25a23	66972	600.738	-1.0087	0.087498	-11.5283	9.49842e-31	1.76457e-29
ENSMUSG00000013701	Timm23	53600	3930.06	0.569668	0.049452	11.5196	1.0508e-30	1.95016e-29
ENSMUSG00000070713	Gm10282	100042405	1158.68	0.716047	0.0621817	11.5154	1.10351e-30	2.04592e-29
ENSMUSG00000037257	Aagab	66939	4529.57	-0.534422	0.0464252	-11.5115	1.15517e-30	2.13956e-29
ENSMUSG00000026663	Atf6	226641	4301.57	-0.561097	0.048751	-11.5095	1.18224e-30	2.1875e-29
ENSMUSG00000079316	Rab9	56382	1381.16	-0.72847	0.0633562	-11.498	1.3501e-30	2.49558e-29
ENSMUSG00000060992	Copz1	56447	6590.3	0.477491	0.0415512	11.4916	1.45332e-30	2.68369e-29
ENSMUSG00000028771	Ptpn12	19248	2008.87	0.785825	0.0683938	11.4897	1.48614e-30	2.74156e-29
ENSMUSG00000043939	A530064D06Rik	328830	448.51	1.47948	0.128863	11.481	1.64317e-30	3.02823e-29
ENSMUSG00000002910	Arrdc2	70807	628.755	-0.968164	0.0843361	-11.4798	1.66625e-30	3.0677e-29
ENSMUSG00000022807	Osbpl11	106326	5700.57	-0.512284	0.044704	-11.4595	2.10802e-30	3.87716e-29
ENSMUSG00000022956	Atp5o	28080	2795.28	0.566622	0.0494465	11.4593	2.11259e-30	3.8817e-29
ENSMUSG00000058290	Espl1	105988	524.535	1.21898	0.106405	11.4561	2.19177e-30	4.02319e-29
ENSMUSG00000008393	Carhsp1	52502	3015.51	0.510595	0.0445742	11.455	2.22064e-30	4.07213e-29
ENSMUSG00000060512	0610040J01Rik	76261	569.186	-1.05556	0.0921587	-11.4537	2.25289e-30	4.12717e-29
ENSMUSG00000060594	Layn	244864	399.716	1.44865	0.126718	11.4321	2.8907e-30	5.29035e-29
ENSMUSG00000007659	Bcl2l1	12048	7316.43	0.488481	0.042731	11.4315	2.90924e-30	5.31902e-29
ENSMUSG00000073418	C4b	12268	466.339	-1.47735	0.129291	-11.4266	3.07939e-30	5.62454e-29
ENSMUSG00000018819	Lsp1	16985	1242.39	0.693463	0.0607136	11.4219	3.25103e-30	5.93216e-29
ENSMUSG00000039234	Sec24d	69608	3637.77	0.539883	0.0473356	11.4054	3.92834e-30	7.16098e-29
ENSMUSG00000056413	Adap1	231821	4186.55	0.557623	0.0489112	11.4007	4.14714e-30	7.55238e-29
ENSMUSG00000019579	Mydgf	28106	2817.39	0.629924	0.0552602	11.3992	4.21859e-30	7.67492e-29
ENSMUSG00000037594	Clba1	217887	885.63	-0.935835	0.082139	-11.3933	4.5151e-30	8.20628e-29
ENSMUSG00000030522	Mtmr10	233315	2594.42	-0.573192	0.0503553	-11.383	5.08457e-30	9.23223e-29
ENSMUSG00000023008	Fmnl3	22379	7452.35	-0.456828	0.0401553	-11.3765	5.47224e-30	9.92636e-29
ENSMUSG00000045827	Serpinb9	20723	1464.62	0.849716	0.0747035	11.3745	5.60181e-30	1.01514e-28
ENSMUSG00000020437	Myo1g	246177	3126.67	0.522472	0.0459755	11.3642	6.30749e-30	1.1419e-28
ENSMUSG00000022433	Csnk1e	27373	1948.45	-0.63065	0.0555137	-11.3603	6.59549e-30	1.19287e-28
ENSMUSG00000055782	Abcd2	26874	3912.15	-0.758612	0.06678	-11.3599	6.62359e-30	1.19678e-28
ENSMUSG00000020668	Kif3c	16570	1611.55	0.739656	0.0651456	11.3539	7.09279e-30	1.28031e-28
ENSMUSG00000031657	Heatr3	234549	1387.19	0.673243	0.0593241	11.3486	7.53918e-30	1.35956e-28
ENSMUSG00000035376	Hacd2	70757	2248.3	0.608065	0.0535813	11.3485	7.54762e-30	1.35975e-28
ENSMUSG00000016087	Fli1	14247	5172.47	-0.553191	0.0487624	-11.3446	7.88506e-30	1.41916e-28
ENSMUSG00000037364	Srrt	83701	2384.99	0.612256	0.0539956	11.339	8.41114e-30	1.51237e-28
ENSMUSG00000038520	Tbc1d17	233204	3211.92	-0.699366	0.0617382	-11.3279	9.54277e-30	1.71417e-28
ENSMUSG00000045294	Insig1	231070	2521.72	-0.74873	0.0661083	-11.3258	9.77745e-30	1.75462e-28
ENSMUSG00000028480	Glipr2	384009	194.425	1.85441	0.163786	11.3221	1.01979e-29	1.82829e-28
ENSMUSG00000022565	Plec	18810	7251.25	0.899667	0.0795186	11.3139	1.11969e-29	2.00545e-28
ENSMUSG00000001707	Eef1e1	66143	921.072	0.895083	0.0791229	11.3126	1.13715e-29	2.03475e-28
ENSMUSG00000086841	2410006H16Rik	69221	418.262	-1.13514	0.10038	-11.3084	1.19218e-29	2.1291e-28
ENSMUSG00000003033	Ap1m1	11767	4278.31	0.476776	0.0422243	11.2915	1.44554e-29	2.57907e-28
ENSMUSG00000058558	Rpl5	100503670	5372.92	0.427059	0.0378569	11.2809	1.63082e-29	2.90683e-28
ENSMUSG00000023048	Prr13	66151	7567.21	0.446236	0.0395694	11.2773	1.69881e-29	3.0251e-28
ENSMUSG00000043300	B3galnt1	26879	4036.18	-0.496362	0.044054	-11.2671	1.90694e-29	3.39244e-28
ENSMUSG00000034610	Tut4	230594	1411.07	-0.89663	0.0797501	-11.243	2.50721e-29	4.45175e-28
ENSMUSG00000078134	Gm12355	100502754	950.401	0.848901	0.0755048	11.243	2.50668e-29	4.45175e-28
ENSMUSG00000059796	Eif4a1	13681	27770.5	0.553832	0.0492621	11.2426	2.51949e-29	4.46926e-28
ENSMUSG00000031391	L1cam	16728	137.674	2.58049	0.229728	11.2328	2.81449e-29	4.98775e-28
ENSMUSG00000023505	Cdca3	14793	320.371	1.45518	0.129787	11.2121	3.55794e-29	6.29922e-28
ENSMUSG00000079111	Kdelr2	66913	1899.32	0.578472	0.0516059	11.2094	3.66634e-29	6.48493e-28
ENSMUSG00000003810	Mast2	17776	3357.94	0.568361	0.0507256	11.2046	3.8699e-29	6.83844e-28
ENSMUSG00000033031	Cip2a	224171	299.01	1.40988	0.125857	11.2023	3.97247e-29	7.01297e-28
ENSMUSG00000003206	Ebi3	50498	1125.84	0.984673	0.0879644	11.194	4.36356e-29	7.69603e-28
ENSMUSG00000062345	Serpinb2	18788	94.7399	4.23642	0.378716	11.1863	4.76107e-29	8.38911e-28
ENSMUSG00000019943	Atp2b1	67972	13177.3	-0.425167	0.0380206	-11.1825	4.96465e-29	8.7395e-28
ENSMUSG00000023150	Ivns1abp	117198	6781.79	-0.487914	0.0436438	-11.1795	5.13932e-29	9.02975e-28
ENSMUSG00000035493	Tgfbi	21810	2990.36	0.758033	0.0678053	11.1795	5.13498e-29	9.02975e-28
ENSMUSG00000037012	Hk1	15275	2991.63	0.504563	0.0451643	11.1717	5.60915e-29	9.84587e-28
ENSMUSG00000048007	Timm8a1	30058	590.719	0.913711	0.0818032	11.1696	5.74206e-29	1.00696e-27
ENSMUSG00000003779	Kif20a	19348	526.969	1.39164	0.124609	11.168	5.84956e-29	1.02484e-27
ENSMUSG00000006699	Cdc42	12540	54467.7	0.300172	0.0268867	11.1644	6.09325e-29	1.06652e-27
ENSMUSG00000029201	Ugdh	22235	3799.18	0.463557	0.0415729	11.1504	7.12539e-29	1.246e-27
ENSMUSG00000028821	Syf2	68592	2137.59	-0.620811	0.0556947	-11.1467	7.43296e-29	1.29855e-27
ENSMUSG00000038181	Chpf2	100910	4101.82	0.559524	0.0502166	11.1422	7.81502e-29	1.36401e-27
ENSMUSG00000031770	Herpud1	64209	2951	0.630014	0.0565465	11.1415	7.87584e-29	1.37333e-27
ENSMUSG00000063253	Scoc	56367	2309.65	-0.616701	0.0553707	-11.1377	8.22354e-29	1.4326e-27
ENSMUSG00000076431	Sox4	20677	1415.82	-1.21699	0.109332	-11.1312	8.843e-29	1.53906e-27
ENSMUSG00000038642	Ctss	13040	82602.8	-0.467319	0.0420257	-11.1199	1.00438e-28	1.74642e-27
ENSMUSG00000024413	Npc1	18145	7514.87	-0.486916	0.0437958	-11.1179	1.027e-28	1.78407e-27
ENSMUSG00000041974	Spidr	224008	1960.63	0.587554	0.0529124	11.1043	1.19593e-28	2.07556e-27
ENSMUSG00000039230	Tbcd	108903	2687.3	0.461437	0.0415585	11.1033	1.20888e-28	2.09607e-27
ENSMUSG00000024590	Lmnb1	16906	716.393	1.52546	0.137535	11.0914	1.38049e-28	2.39139e-27
ENSMUSG00000087107	AI662270	100043636	2070.14	0.726965	0.0655449	11.0911	1.38564e-28	2.39805e-27
ENSMUSG00000001056	Nhp2	52530	1295.42	0.892814	0.0805053	11.0901	1.40097e-28	2.42232e-27
ENSMUSG00000022945	Chaf1b	110749	614.052	1.06635	0.0962877	11.0746	1.66628e-28	2.87834e-27
ENSMUSG00000030187	Klra2	16633	412.59	1.77733	0.160509	11.0731	1.69422e-28	2.92388e-27
ENSMUSG00000010453	Kansl3	226976	2647.78	-0.569564	0.0514484	-11.0706	1.74277e-28	3.00486e-27
ENSMUSG00000038204	Asb10	117590	362.191	-1.62666	0.147001	-11.0656	1.84184e-28	3.17271e-27
ENSMUSG00000015656	Hspa8	15481	76749.8	0.450846	0.040747	11.0645	1.86429e-28	3.2054e-27
ENSMUSG00000032475	Nck1	17973	2102.93	0.615621	0.0556388	11.0646	1.86271e-28	3.2054e-27
ENSMUSG00000030095	Tmem43	74122	7441.07	0.398318	0.0360185	11.0587	1.98931e-28	3.41717e-27
ENSMUSG00000037224	Zfyve28	231125	248.601	-1.49999	0.135949	-11.0334	2.63649e-28	4.52467e-27
ENSMUSG00000021361	Tmem14c	66154	4420.76	0.427889	0.0387841	11.0326	2.66126e-28	4.56293e-27
ENSMUSG00000020823	Sec14l1	74136	11491.8	-0.54877	0.0497759	-11.0248	2.90116e-28	4.96964e-27
ENSMUSG00000031672	Got2	14719	4225.6	0.447786	0.0406285	11.0215	3.01087e-28	5.1528e-27
ENSMUSG00000026750	Psmb7	19177	2729.17	0.626512	0.0568503	11.0204	3.04784e-28	5.21124e-27
ENSMUSG00000028581	Laptm5	16792	101516	-0.4119	0.0373776	-11.02	3.06185e-28	5.23035e-27
ENSMUSG00000042997	Nhlrc3	212114	3824.31	-0.583352	0.0529412	-11.0189	3.0991e-28	5.28909e-27
ENSMUSG00000037544	Dlgap5	218977	274.172	1.57236	0.142708	11.0181	3.12709e-28	5.33194e-27
ENSMUSG00000015854	Cd5l	11801	1948.73	-0.984921	0.0893972	-11.0174	3.1516e-28	5.36877e-27
ENSMUSG00000026245	Farsb	23874	3976.59	0.441247	0.0400576	11.0153	3.22472e-28	5.48826e-27
ENSMUSG00000028149	Rap1gds1	229877	9919.85	0.484793	0.0440153	11.0142	3.26491e-28	5.55155e-27
ENSMUSG00000079293	Clec7a	56644	9646.47	-0.509621	0.0462734	-11.0132	3.29892e-28	5.60422e-27
ENSMUSG00000023274	Cd4	12504	856.467	-1.10162	0.100068	-11.0087	3.46893e-28	5.88762e-27
ENSMUSG00000030083	Abtb1	80283	1811.92	-0.915417	0.0831991	-11.0027	3.70784e-28	6.28733e-27
ENSMUSG00000032827	Ppp1r9a	243725	992.685	-1.12656	0.102453	-10.9959	4.00073e-28	6.77774e-27
ENSMUSG00000018412	Kansl1	76719	4858.16	-0.533133	0.0485019	-10.992	4.17573e-28	7.06773e-27
ENSMUSG00000034593	Myo5a	17918	20609.5	-0.553918	0.0503945	-10.9916	4.19259e-28	7.08978e-27
ENSMUSG00000020143	Dock2	94176	8332.3	0.580159	0.052816	10.9845	4.53597e-28	7.66342e-27
ENSMUSG00000074622	Mafb	16658	14853.6	-0.61283	0.0558013	-10.9824	4.64557e-28	7.84142e-27
ENSMUSG00000001424	Snd1	56463	5665.92	0.573483	0.0522941	10.9665	5.5377e-28	9.33874e-27
ENSMUSG00000021365	Nedd9	18003	805.737	0.921202	0.0840569	10.9593	5.99843e-28	1.01065e-26
ENSMUSG00000027610	Gss	14854	838.829	0.830782	0.0758248	10.9566	6.17722e-28	1.03982e-26
ENSMUSG00000025487	Psmd13	23997	3829.48	0.512329	0.0467711	10.954	6.35899e-28	1.06944e-26
ENSMUSG00000024778	Fas	14102	404.529	1.336	0.121973	10.9533	6.40722e-28	1.07658e-26
ENSMUSG00000010406	Mrpl52	68836	1382.95	0.984555	0.0898996	10.9517	6.51948e-28	1.09444e-26
ENSMUSG00000024030	Abcg1	11307	7290.07	0.541026	0.0494086	10.95	6.64276e-28	1.11413e-26
ENSMUSG00000037370	Enpp1	18605	1984.04	-1.01537	0.092854	-10.9351	7.83421e-28	1.31276e-26
ENSMUSG00000028757	Ddost	13200	9461.82	0.408555	0.0373771	10.9306	8.2258e-28	1.37713e-26
ENSMUSG00000027947	Il6ra	16194	1862.85	-0.620993	0.0568566	-10.9221	9.04019e-28	1.5121e-26
ENSMUSG00000022285	Ywhaz	22631	26184.1	0.389516	0.0356903	10.9138	9.90379e-28	1.65505e-26
ENSMUSG00000005667	Mthfd2	17768	3433.39	0.715125	0.0655358	10.912	1.0104e-27	1.68699e-26
ENSMUSG00000022876	Samsn1	67742	4588.98	0.588109	0.0539071	10.9097	1.03616e-27	1.72843e-26
ENSMUSG00000022799	Arhgap31	12549	6117.47	0.796008	0.0729817	10.907	1.06771e-27	1.77945e-26
ENSMUSG00000025408	Ddit3	13198	1210.88	-1.08737	0.0997174	-10.9045	1.09652e-27	1.82582e-26
ENSMUSG00000030330	Ing4	28019	3201.53	-0.595526	0.0546618	-10.8947	1.22127e-27	2.03171e-26
ENSMUSG00000038305	Spats2l	67198	177.243	-2.34215	0.214993	-10.8941	1.22955e-27	2.04365e-26
ENSMUSG00000026821	Ralgds	19730	5427.31	0.991718	0.0911355	10.8818	1.4076e-27	2.33748e-26
ENSMUSG00000027642	Rpn2	20014	14473.8	0.370883	0.0341006	10.8761	1.49792e-27	2.48522e-26
ENSMUSG00000007891	Ctsd	13033	1.20728e+06	-0.380792	0.0350262	-10.8716	1.57332e-27	2.60798e-26
ENSMUSG00000034614	Pik3ip1	216505	168.817	-2.0387	0.18753	-10.8713	1.57892e-27	2.61491e-26
ENSMUSG00000044447	Dock5	68813	548.429	1.72108	0.158332	10.87	1.6014e-27	2.64976e-26
ENSMUSG00000070284	Gmppb	331026	741.371	0.981176	0.0902917	10.8667	1.66035e-27	2.74485e-26
ENSMUSG00000021595	Nsun2	28114	3919.58	0.49668	0.0457305	10.861	1.76719e-27	2.91887e-26
ENSMUSG00000015880	Ncapg	54392	328.821	1.66534	0.153624	10.8404	2.21497e-27	3.65519e-26
ENSMUSG00000021248	Tmed10	68581	13351.7	0.382333	0.0352701	10.8401	2.22127e-27	3.66232e-26
ENSMUSG00000031504	Rab20	19332	3609.84	0.730394	0.0674156	10.8342	2.37015e-27	3.90431e-26
ENSMUSG00000038644	Pold1	18971	1240.42	0.791773	0.0730843	10.8337	2.38343e-27	3.92268e-26
ENSMUSG00000012443	Kif11	16551	540.026	1.50172	0.138649	10.8311	2.45113e-27	4.0305e-26
ENSMUSG00000028800	Hdac1	433759	3169.97	0.532748	0.0491929	10.8298	2.48787e-27	4.08728e-26
ENSMUSG00000074419	Gm15448	100041146	716.755	0.884758	0.0817137	10.8275	2.54908e-27	4.18411e-26
ENSMUSG00000022021	Diaph3	56419	244.458	1.53674	0.142019	10.8207	2.74721e-27	4.50533e-26
ENSMUSG00000022322	Shcbp1	20419	278.385	1.87464	0.173431	10.8091	3.11694e-27	5.10713e-26
ENSMUSG00000041153	Osgin2	209212	912.181	0.853657	0.0790142	10.8038	3.30114e-27	5.39936e-26
ENSMUSG00000038759	Nup205	70699	4048.69	0.582871	0.0539813	10.7977	3.53083e-27	5.76483e-26
ENSMUSG00000079426	Arpc4	68089	11395.6	0.457109	0.0423553	10.7922	3.7454e-27	6.10977e-26
ENSMUSG00000053560	Ier2	15936	2005.21	0.738329	0.0684479	10.7867	3.97704e-27	6.48191e-26
ENSMUSG00000023044	Csad	246277	1019.32	-0.809593	0.0750682	-10.7848	4.06265e-27	6.60978e-26
ENSMUSG00000047153	Khnyn	219094	1857.44	-0.884492	0.0820124	-10.7848	4.05913e-27	6.60978e-26
ENSMUSG00000015759	Cnih1	12793	2404.28	0.639917	0.0593367	10.7845	4.07451e-27	6.62323e-26
ENSMUSG00000038301	Snx10	71982	8254.13	0.469831	0.0435721	10.7829	4.14826e-27	6.73719e-26
ENSMUSG00000018930	Ccl4	20303	4471.4	0.966997	0.0896915	10.7814	4.21595e-27	6.84109e-26
ENSMUSG00000024773	Atg2a	329015	4084	-0.553214	0.0513149	-10.7808	4.24342e-27	6.87964e-26
ENSMUSG00000022508	Bcl6	12053	3003.84	-1.05359	0.0977851	-10.7745	4.54002e-27	7.35403e-26
ENSMUSG00000025132	Arhgdia	192662	31714.4	0.417409	0.0387455	10.7731	4.61248e-27	7.46486e-26
ENSMUSG00000021286	Zfyve21	68520	1528.23	-0.767705	0.071286	-10.7694	4.80325e-27	7.7668e-26
ENSMUSG00000025464	Paox	212503	1511.66	-0.85864	0.0797358	-10.7686	4.8447e-27	7.82696e-26
ENSMUSG00000089803	Gm10171	100041219	2133.98	0.619751	0.057554	10.7682	4.86571e-27	7.85403e-26
ENSMUSG00000074978	Actg-ps1	621269	1036.06	0.725568	0.067401	10.7649	5.03924e-27	8.12704e-26
ENSMUSG00000022174	Dad1	13135	3698.67	0.463727	0.0430861	10.7628	5.15775e-27	8.31091e-26
ENSMUSG00000020827	Mink1	50932	2410.5	0.584416	0.0543062	10.7615	5.23149e-27	8.42238e-26
ENSMUSG00000018774	Cd68	12514	73461.7	-0.302327	0.0281091	-10.7555	5.58383e-27	8.98179e-26
ENSMUSG00000029364	Wsb2	59043	8414.21	0.434953	0.0404543	10.7517	5.81749e-27	9.3495e-26
ENSMUSG00000047180	Neurl3	214854	6292.96	0.428687	0.0398912	10.7464	6.16135e-27	9.89352e-26
ENSMUSG00000021238	Aldh6a1	104776	2436.83	-0.643145	0.0598938	-10.7381	6.74229e-27	1.08169e-25
ENSMUSG00000029426	Scarb2	12492	7035.96	-0.509915	0.0474919	-10.7369	6.83137e-27	1.09504e-25
ENSMUSG00000060224	Pyroxd2	74580	779.46	-0.941167	0.0876808	-10.734	7.04616e-27	1.12848e-25
ENSMUSG00000006920	Ezh1	14055	3525.03	-0.667112	0.0621615	-10.7319	7.20802e-27	1.15341e-25
ENSMUSG00000025473	Adam8	11501	43181	0.332232	0.0309602	10.731	7.28311e-27	1.16442e-25
ENSMUSG00000029004	Kmt2e	69188	3242.59	-0.508286	0.0474227	-10.7182	8.3613e-27	1.33564e-25
ENSMUSG00000027346	Gpcpd1	74182	2823.91	-0.606894	0.0566239	-10.718	8.38046e-27	1.33754e-25
ENSMUSG00000022307	Oxr1	170719	6924.63	-0.505627	0.047179	-10.7172	8.45152e-27	1.34772e-25
ENSMUSG00000032555	Topbp1	235559	2234.45	0.696198	0.0649823	10.7136	8.78358e-27	1.39946e-25
ENSMUSG00000003500	Impdh1	23917	890.959	0.784134	0.0732257	10.7085	9.29019e-27	1.47867e-25
ENSMUSG00000006095	Tbcb	66411	2909.37	0.533861	0.0498545	10.7084	9.29672e-27	1.47867e-25
ENSMUSG00000042684	Npl	74091	2473.78	-0.503564	0.0470556	-10.7015	1.00183e-26	1.59206e-25
ENSMUSG00000008855	Hdac5	15184	4404.67	-0.569325	0.0532477	-10.692	1.10932e-26	1.76136e-25
ENSMUSG00000025289	Prdx4	53381	3309.32	0.528162	0.0494426	10.6823	1.23133e-26	1.95341e-25
ENSMUSG00000083899	Gm12346	544800	1924.4	0.712247	0.0666851	10.6807	1.25264e-26	1.98552e-25
ENSMUSG00000014959	Gorasp2	70231	4430.99	0.450893	0.0422243	10.6785	1.28306e-26	2.032e-25
ENSMUSG00000060090	Rp2	19889	5228.01	0.440563	0.0412703	10.6751	1.33172e-26	2.10725e-25
ENSMUSG00000047264	Zfp358	140482	829.311	-0.860035	0.0805912	-10.6716	1.38266e-26	2.18598e-25
ENSMUSG00000028906	Epb41	269587	6258.45	-0.558129	0.0523274	-10.6661	1.46662e-26	2.31673e-25
ENSMUSG00000032000	Birc3	11796	4031.82	0.697522	0.0654188	10.6624	1.52576e-26	2.40809e-25
ENSMUSG00000019802	Sec63	140740	3250.42	0.527189	0.0494468	10.6618	1.53667e-26	2.42324e-25
ENSMUSG00000021109	Hif1a	15251	9823.55	0.456986	0.0428633	10.6615	1.54148e-26	2.42875e-25
ENSMUSG00000038963	Slco4a1	108115	100.466	2.73966	0.257065	10.6574	1.6095e-26	2.53376e-25
ENSMUSG00000070858	Gm1673	381633	764.352	-1.04202	0.097881	-10.6458	1.82437e-26	2.86957e-25
ENSMUSG00000078515	Ddi2	68817	4630.94	-0.551851	0.051842	-10.6449	1.84256e-26	2.89572e-25
ENSMUSG00000019256	Ahr	11622	659.139	-1.32968	0.125058	-10.6325	2.1029e-26	3.30206e-25
ENSMUSG00000020238	Ncln	103425	6531.36	0.482971	0.0454433	10.628	2.20842e-26	3.4648e-25
ENSMUSG00000048779	P2ry6	233571	13456.5	-0.367081	0.0345412	-10.6273	2.22377e-26	3.48591e-25
ENSMUSG00000047514	Tspyl1	22110	5200.87	-0.48104	0.0452719	-10.6256	2.26605e-26	3.54918e-25
ENSMUSG00000004266	Ptpn6	15170	15897.8	0.364329	0.0343274	10.6134	2.58312e-26	4.04236e-25
ENSMUSG00000025579	Gaa	14387	13780.3	-0.371421	0.0350241	-10.6047	2.83253e-26	4.42891e-25
ENSMUSG00000035722	Abca7	27403	4061.15	0.492355	0.0464312	10.6039	2.85659e-26	4.46276e-25
ENSMUSG00000034868	Myl12b	67938	9115.58	0.38035	0.0358896	10.5978	3.05091e-26	4.7623e-25
ENSMUSG00000028820	Sfpq	71514	2499.04	0.630829	0.0595695	10.5898	3.32285e-26	5.18242e-25
ENSMUSG00000041355	Ssr2	66256	3121.76	0.499247	0.0472287	10.5709	4.06785e-26	6.33898e-25
ENSMUSG00000020330	Hmmr	15366	450.011	1.62787	0.154119	10.5624	4.4496e-26	6.92802e-25
ENSMUSG00000030225	Dera	232449	2045.71	0.600069	0.0568152	10.5618	4.48086e-26	6.97081e-25
ENSMUSG00000038900	Rpl12	269261	2047.28	0.620122	0.0587334	10.5582	4.6528e-26	7.23221e-25
ENSMUSG00000055541	Lair1	52855	6263.73	0.399788	0.0378847	10.5528	4.93253e-26	7.66056e-25
ENSMUSG00000062082	Cd200r4	239849	3169.1	-0.461119	0.0437184	-10.5475	5.21744e-26	8.09624e-25
ENSMUSG00000045983	Eif4g1	208643	13673.1	0.390026	0.0369822	10.5463	5.28256e-26	8.1904e-25
ENSMUSG00000025758	Plk4	20873	594.825	0.987413	0.0936301	10.5459	5.30665e-26	8.22085e-25
ENSMUSG00000027405	Nop56	67134	2303.97	0.659581	0.0625491	10.545	5.35689e-26	8.29172e-25
ENSMUSG00000017697	Ada	11486	1001.92	-0.861942	0.0817464	-10.5441	5.40895e-26	8.3653e-25
ENSMUSG00000042677	Zc3h12a	230738	1125.08	0.970565	0.0921982	10.5269	6.49089e-26	1.00302e-24
ENSMUSG00000101188	Eif4a-ps4	13674	8611.16	0.608843	0.0578383	10.5266	6.51151e-26	1.00536e-24
ENSMUSG00000024981	Acsl5	433256	7971.97	0.487482	0.0463442	10.5187	7.08193e-26	1.09252e-24
ENSMUSG00000027429	Sec23b	27054	4199.85	0.438833	0.0417368	10.5143	7.42335e-26	1.14424e-24
ENSMUSG00000071324	Armc2	213402	254.602	-1.62585	0.154682	-10.5109	7.69211e-26	1.18468e-24
ENSMUSG00000037526	Atg14	100504663	1620.24	-0.806203	0.0767178	-10.5087	7.87852e-26	1.21237e-24
ENSMUSG00000020590	Snx13	217463	6400.75	-0.557341	0.0530377	-10.5084	7.90422e-26	1.21532e-24
ENSMUSG00000020715	Ern1	78943	2412.67	-0.815232	0.0775942	-10.5063	8.0761e-26	1.24071e-24
ENSMUSG00000003541	Ier3	15937	5768.35	1.37406	0.130798	10.5052	8.17264e-26	1.2545e-24
ENSMUSG00000018927	Ccl6	20305	9196.18	0.665247	0.0633395	10.5029	8.37882e-26	1.28508e-24
ENSMUSG00000022858	Tra2b	20462	4689.24	0.506432	0.0483006	10.485	1.01258e-25	1.54915e-24
ENSMUSG00000079418	Atg4a	666468	1004.78	0.697794	0.0665583	10.484	1.02366e-25	1.56481e-24
ENSMUSG00000039747	Orai2	269717	3152.92	0.589246	0.056254	10.4747	1.12848e-25	1.72361e-24
ENSMUSG00000089991	Gm16332	100417200	2036.13	-0.718598	0.0686037	-10.4746	1.12986e-25	1.72429e-24
ENSMUSG00000015671	Psma2	19166	5680.74	0.447641	0.0427687	10.4666	1.23016e-25	1.87582e-24
ENSMUSG00000048142	Nat8l	269642	756.716	-1.28288	0.122589	-10.4649	1.25157e-25	1.90689e-24
ENSMUSG00000051615	Rap2a	76108	8180.51	-0.549055	0.0524982	-10.4585	1.33899e-25	2.0384e-24
ENSMUSG00000081723	Gm15931	112136069	646.191	0.973666	0.0930983	10.4585	1.34012e-25	2.03844e-24
ENSMUSG00000032254	Kif23	71819	442.563	1.458	0.139534	10.4491	1.47968e-25	2.24888e-24
ENSMUSG00000034959	Rubcnl	271221	719.247	-1.28501	0.122997	-10.4475	1.50382e-25	2.28367e-24
ENSMUSG00000002055	Spag5	54141	287.202	1.70306	0.163097	10.442	1.59407e-25	2.41875e-24
ENSMUSG00000052337	Immt	76614	5912.67	0.390674	0.0374283	10.4379	1.66378e-25	2.52244e-24
ENSMUSG00000054720	Lrrc8c	100604	1280.55	1.26339	0.121082	10.4341	1.73236e-25	2.62427e-24
ENSMUSG00000046341	Gm11223	100039888	1059.84	0.761622	0.0730189	10.4305	1.7997e-25	2.72403e-24
ENSMUSG00000037072	Selenof	93684	12084	0.31844	0.0305338	10.4291	1.82593e-25	2.76147e-24
ENSMUSG00000079523	Tmsb10	19240	864.758	1.16839	0.11211	10.4218	1.97147e-25	2.97914e-24
ENSMUSG00000008373	Prpf31	68988	1860.44	0.593601	0.056963	10.4208	1.99236e-25	3.00825e-24
ENSMUSG00000071497	Nutf2-ps1	100043462	2220.78	0.573703	0.0550608	10.4195	2.02117e-25	3.04926e-24
ENSMUSG00000028884	Rpa2	19891	906.482	0.817515	0.0785353	10.4095	2.24363e-25	3.38211e-24
ENSMUSG00000045455	Gm9797	100039343	510.77	0.901539	0.0866866	10.4	2.47998e-25	3.73534e-24
ENSMUSG00000025917	Cops5	26754	2400.8	0.497025	0.0478041	10.3971	2.55523e-25	3.84241e-24
ENSMUSG00000041362	Shtn1	71653	2449.13	0.612567	0.0589167	10.3972	2.55395e-25	3.84241e-24
ENSMUSG00000032733	Snx33	235406	1102.96	-0.870868	0.0838223	-10.3895	2.76916e-25	4.16073e-24
ENSMUSG00000013707	Tnfaip8l2	69769	5294.91	-0.545308	0.0525602	-10.3749	3.22455e-25	4.83709e-24
ENSMUSG00000028618	Tmem59	56374	17776.9	-0.377984	0.0364325	-10.3749	3.22437e-25	4.83709e-24
ENSMUSG00000049562	Ap5b1	381201	1994.84	0.67736	0.0653212	10.3697	3.40633e-25	5.10562e-24
ENSMUSG00000020593	Lpin1	14245	1184.9	-0.736927	0.0711713	-10.3543	4.00211e-25	5.9889e-24
ENSMUSG00000002699	Lcp2	16822	5944.17	0.633679	0.0612486	10.346	4.36248e-25	6.52288e-24
ENSMUSG00000028068	Iqgap3	404710	1126.29	0.835337	0.0807999	10.3383	4.72616e-25	7.06094e-24
ENSMUSG00000022515	Anks3	72615	1309.69	-0.613384	0.0593862	-10.3287	5.22517e-25	7.80016e-24
ENSMUSG00000031821	Gins2	272551	403.785	1.32186	0.128173	10.3131	6.15001e-25	9.17335e-24
ENSMUSG00000041762	Gpr155	68526	797.557	-1.15395	0.111896	-10.3127	6.17479e-25	9.20288e-24
ENSMUSG00000074677	Sirpb1c	100038947	451.575	-1.03293	0.10019	-10.3096	6.37441e-25	9.49273e-24
ENSMUSG00000041935	AW549877	106064	3937.67	-0.664927	0.0645191	-10.3059	6.62781e-25	9.86214e-24
ENSMUSG00000026020	Nop58	55989	1298.61	0.710776	0.0689793	10.3042	6.74521e-25	1.00288e-23
ENSMUSG00000051864	Tbc1d22a	223754	5530.21	-0.5905	0.057308	-10.304	6.76145e-25	1.00448e-23
ENSMUSG00000082691	Dynlt1-ps1	100043890	2041.56	0.550989	0.0535104	10.2969	7.28004e-25	1.08065e-23
ENSMUSG00000033096	Apmap	71881	1918.2	0.577942	0.0561624	10.2906	7.77198e-25	1.15275e-23
ENSMUSG00000020152	Actr2	66713	19529	0.428829	0.0416816	10.2882	7.96444e-25	1.18035e-23
ENSMUSG00000028034	Fubp1	51886	2074.21	0.54017	0.0525061	10.2878	8.00177e-25	1.18493e-23
ENSMUSG00000048118	Arid4a	238247	1708.97	-0.602466	0.0585771	-10.285	8.23462e-25	1.21843e-23
ENSMUSG00000027940	Tpm3	59069	31542.3	0.306798	0.0298379	10.2821	8.48173e-25	1.25299e-23
ENSMUSG00000053332	Gas5	14455	1147.85	-0.678775	0.0660146	-10.2822	8.47725e-25	1.25299e-23
ENSMUSG00000042613	Pbxip1	229534	4017.49	-0.587228	0.0571334	-10.2782	8.83615e-25	1.3043e-23
ENSMUSG00000022246	Rai14	75646	1961.52	0.644755	0.0627327	10.2778	8.87198e-25	1.30855e-23
ENSMUSG00000020328	Nudcd2	52653	1369.07	0.694158	0.0675464	10.2767	8.97026e-25	1.32199e-23
ENSMUSG00000027318	Adam33	110751	682.85	-1.02072	0.0993405	-10.2749	9.1394e-25	1.34584e-23
ENSMUSG00000022607	Ptk2	14083	715.998	0.955234	0.0929887	10.2726	9.36664e-25	1.3782e-23
ENSMUSG00000058135	Gstm1	14862	7370.04	-0.54222	0.0528003	-10.2693	9.69394e-25	1.42523e-23
ENSMUSG00000006464	Bbs1	52028	370.912	-1.16693	0.113642	-10.2685	9.77499e-25	1.436e-23
ENSMUSG00000027333	Smox	228608	4204.95	-0.479513	0.0466988	-10.2682	9.80073e-25	1.43863e-23
ENSMUSG00000032265	Tent5a	212943	2086.32	-1.02707	0.10003	-10.2676	9.86237e-25	1.44653e-23
ENSMUSG00000020130	Tbc1d15	66687	4923.07	-0.54614	0.0531948	-10.2668	9.94526e-25	1.45753e-23
ENSMUSG00000002763	Pex6	224824	2465.99	-0.5929	0.0577824	-10.2609	1.05708e-24	1.54797e-23
ENSMUSG00000000184	Ccnd2	12444	680.97	1.57832	0.154059	10.2449	1.24781e-24	1.82583e-23
ENSMUSG00000080977	Gm13772	101055991	387.251	1.17621	0.114827	10.2434	1.26723e-24	1.85278e-23
ENSMUSG00000018042	Cyb5r3	109754	12696.4	0.420471	0.0410572	10.2411	1.29763e-24	1.89573e-23
ENSMUSG00000034165	Ccnd3	12445	1168.06	0.6709	0.0655142	10.2405	1.30518e-24	1.90525e-23
ENSMUSG00000058254	Tspan7	21912	616.393	-1.14527	0.111961	-10.2291	1.46842e-24	2.14185e-23
ENSMUSG00000051378	Kif18b	70218	244.544	1.59609	0.156291	10.2123	1.74658e-24	2.54557e-23
ENSMUSG00000057244	Gm6139	108169072	1618.45	0.620572	0.0607719	10.2115	1.76127e-24	2.56495e-23
ENSMUSG00000031925	Maml2	270118	1089.95	-0.795361	0.0779698	-10.2009	1.9646e-24	2.85881e-23
ENSMUSG00000055322	Tns1	21961	378.185	-1.2747	0.124988	-10.1986	2.01052e-24	2.92333e-23
ENSMUSG00000026484	Rnf2	19821	4277.13	-0.546107	0.0535545	-10.1972	2.04036e-24	2.96438e-23
ENSMUSG00000061833	Gm6311	622313	2549.26	0.614527	0.0602807	10.1944	2.09986e-24	3.04843e-23
ENSMUSG00000021569	Trip13	69716	439.216	1.10027	0.107963	10.1912	2.17022e-24	3.1481e-23
ENSMUSG00000024597	Slc12a2	20496	1618.83	-0.68912	0.0676225	-10.1907	2.18212e-24	3.16288e-23
ENSMUSG00000022136	Dnajc3	100037258	7371.38	0.544295	0.0534263	10.1878	2.24855e-24	3.25661e-23
ENSMUSG00000024516	Sec11c	66286	3184.5	0.486	0.0477108	10.1864	2.28116e-24	3.30124e-23
ENSMUSG00000032462	Pik3cb	74769	4905.07	0.463241	0.045478	10.186	2.289e-24	3.31e-23
ENSMUSG00000056749	Nfil3	18030	1431.86	-0.618916	0.0607625	-10.1858	2.2944e-24	3.31521e-23
ENSMUSG00000074874	Ctla2b	13025	2879.57	-0.782078	0.0767822	-10.1857	2.29771e-24	3.3174e-23
ENSMUSG00000071708	Sms	20603	1692.59	0.594636	0.0584221	10.1783	2.47951e-24	3.57708e-23
ENSMUSG00000039994	Timeless	21853	497.507	1.28508	0.126264	10.1778	2.49236e-24	3.59281e-23
ENSMUSG00000031262	Cenpi	102920	264.736	1.31132	0.128845	10.1775	2.50016e-24	3.60124e-23
ENSMUSG00000042406	Atf4	11911	7035.83	-0.465417	0.0457355	-10.1763	2.5304e-24	3.64196e-23
ENSMUSG00000020372	Rack1	14694	5687.45	0.433713	0.0426461	10.1701	2.6973e-24	3.87915e-23
ENSMUSG00000030346	Rad51ap1	19362	171.563	2.00095	0.19677	10.169	2.72789e-24	3.9201e-23
ENSMUSG00000027454	Gins1	69270	194.753	1.46733	0.144337	10.166	2.81214e-24	4.03802e-23
ENSMUSG00000020720	Psmd12	66997	4349.56	0.434954	0.042801	10.1622	2.92259e-24	4.19336e-23
ENSMUSG00000029622	Arpc1b	11867	44517.3	0.355068	0.0349977	10.1454	3.47183e-24	4.97755e-23
ENSMUSG00000056124	B4galt6	56386	6869.23	-0.414709	0.0408815	-10.1442	3.51775e-24	5.03947e-23
ENSMUSG00000024193	Phf1	21652	975.284	-0.902778	0.0890084	-10.1426	3.57384e-24	5.11585e-23
ENSMUSG00000021054	Sgpp1	81535	5116.04	-0.483043	0.0476281	-10.142	3.59754e-24	5.14468e-23
ENSMUSG00000040699	Limd2	67803	9638.96	0.487727	0.0480902	10.1419	3.59955e-24	5.14468e-23
ENSMUSG00000025980	Hspd1	15510	7216.15	0.455282	0.0448917	10.1418	3.60444e-24	5.14769e-23
ENSMUSG00000020267	Hint1	15254	4309.78	0.584718	0.0576729	10.1385	3.72694e-24	5.31852e-23
ENSMUSG00000034613	Ppm1h	319468	2799.84	-0.496746	0.0490701	-10.1232	4.35934e-24	6.21619e-23
ENSMUSG00000082762	Gm12366	620559	1737.05	0.633672	0.062613	10.1204	4.48363e-24	6.38848e-23
ENSMUSG00000007812	Zfp655	72611	3250.9	-0.543268	0.0537059	-10.1156	4.71106e-24	6.70736e-23
ENSMUSG00000002059	Rab34	19376	1754.53	-0.700607	0.0692608	-10.1155	4.71659e-24	6.71005e-23
ENSMUSG00000081643	Gm11605	667644	744.13	0.789249	0.0780328	10.1143	4.77327e-24	6.78546e-23
ENSMUSG00000026628	Atf3	11910	10449.8	-0.465479	0.0460462	-10.1089	5.04246e-24	7.16262e-23
ENSMUSG00000030930	Chst15	77590	1244.92	-0.673119	0.0666392	-10.1009	5.47133e-24	7.76584e-23
ENSMUSG00000015968	Cacna1d	12289	512.146	-1.0367	0.102683	-10.0961	5.74544e-24	8.14864e-23
ENSMUSG00000036528	Ppfibp2	19024	2112.63	0.76861	0.0761838	10.0889	6.1864e-24	8.76731e-23
ENSMUSG00000037972	Snn	20621	378.405	-1.17329	0.116299	-10.0886	6.20514e-24	8.78713e-23
ENSMUSG00000023066	Rttn	246102	448.327	-1.09175	0.108323	-10.0787	6.86391e-24	9.71256e-23
ENSMUSG00000034210	Efcab14	230648	3575.31	-0.441963	0.0438643	-10.0757	7.07632e-24	1.00055e-22
ENSMUSG00000032322	Pstpip1	19200	1061.22	0.703828	0.0699161	10.0667	7.74996e-24	1.09496e-22
ENSMUSG00000030751	Psma1	26440	7792.34	0.423014	0.0420727	10.0544	8.78901e-24	1.24081e-22
ENSMUSG00000027544	Nfatc2	18019	2566.72	-0.606456	0.0603501	-10.049	9.28343e-24	1.30961e-22
ENSMUSG00000033209	Ttc28	209683	1221.54	-0.750976	0.0747774	-10.0428	9.88077e-24	1.39281e-22
ENSMUSG00000038418	Egr1	13653	1639.51	1.17393	0.116901	10.0421	9.9576e-24	1.40257e-22
ENSMUSG00000028007	Snx7	76561	1274.49	0.641983	0.0639392	10.0405	1.0114e-23	1.42351e-22
ENSMUSG00000024276	Zfp397	69256	1697.13	-0.674717	0.0672028	-10.04	1.01652e-23	1.42962e-22
ENSMUSG00000030761	Myo7a	17921	6365.01	0.377577	0.0376365	10.0322	1.1003e-23	1.5451e-22
ENSMUSG00000032449	Slc25a36	192287	4439.25	-0.431927	0.0430538	-10.0323	1.09965e-23	1.5451e-22
ENSMUSG00000005354	Txn2	56551	3825.55	0.463283	0.0462129	10.025	1.18392e-23	1.66127e-22
ENSMUSG00000027641	Rbl1	19650	1380.2	0.871232	0.0869236	10.023	1.2083e-23	1.69418e-22
ENSMUSG00000020134	Peli1	67245	2863.74	-0.517343	0.0516399	-10.0183	1.26698e-23	1.77512e-22
ENSMUSG00000017679	Ttpal	76080	2083.11	0.693135	0.0692652	10.007	1.42033e-23	1.98847e-22
ENSMUSG00000051223	Bzw1	66882	16284.3	0.38201	0.0381942	10.0018	1.49683e-23	2.09397e-22
ENSMUSG00000034947	Tmem106a	217203	12748.3	-0.463175	0.0463217	-9.99909	1.53802e-23	2.14996e-22
ENSMUSG00000071644	Eef1g	67160	5334.19	0.448485	0.0448616	9.9971	1.56929e-23	2.19202e-22
ENSMUSG00000041633	Kctd12b	207474	806.51	-0.914582	0.0914939	-9.9961	1.5851e-23	2.21242e-22
ENSMUSG00000094242	Gm5456	432817	443.023	1.04173	0.10425	9.99267	1.64102e-23	2.28876e-22
ENSMUSG00000057191	AB124611	382062	1226.05	0.704716	0.070538	9.99058	1.67591e-23	2.33564e-22
ENSMUSG00000022033	Pbk	52033	338.671	1.99132	0.199375	9.98786	1.72268e-23	2.39902e-22
ENSMUSG00000022551	Cyc1	66445	4224.08	0.434503	0.0435272	9.98234	1.82113e-23	2.53422e-22
ENSMUSG00000037710	Cisd1	52637	1089.61	0.724059	0.0725925	9.97429	1.97503e-23	2.74631e-22
ENSMUSG00000059923	Grb2	14784	12182.3	-0.259886	0.0260659	-9.97036	2.05478e-23	2.85504e-22
ENSMUSG00000058799	Nap1l1	53605	4397.71	0.518223	0.0520308	9.95992	2.28241e-23	3.16895e-22
ENSMUSG00000018427	Ypel2	77864	439.483	-1.31295	0.131838	-9.95881	2.30811e-23	3.20223e-22
ENSMUSG00000019889	Ptprk	19272	258.42	-1.51117	0.151858	-9.95119	2.49186e-23	3.45455e-22
ENSMUSG00000004933	Matk	17179	249.239	-1.17254	0.117889	-9.94609	2.62291e-23	3.63351e-22
ENSMUSG00000053510	Nrd1	230598	6162.38	0.492418	0.0495169	9.94444	2.66679e-23	3.69153e-22
ENSMUSG00000021451	Sema4d	20354	25970.1	0.422454	0.0424954	9.94116	2.75611e-23	3.81231e-22
ENSMUSG00000033016	Nfatc1	18018	3995.21	-0.494818	0.0498754	-9.92109	3.37046e-23	4.6586e-22
ENSMUSG00000068220	Lgals1	16852	20237.5	0.504557	0.0508582	9.92086	3.37847e-23	4.66617e-22
ENSMUSG00000002477	Snrpd1	20641	935.469	0.845272	0.0853027	9.90909	3.80102e-23	5.24587e-22
ENSMUSG00000024424	Ttc39c	72747	364.113	1.22368	0.123505	9.90792	3.84581e-23	5.30371e-22
ENSMUSG00000031967	Afg3l1	114896	3735.82	0.430787	0.0434958	9.90411	3.99526e-23	5.50571e-22
ENSMUSG00000027763	Mbnl1	56758	25056.6	-0.31843	0.0321614	-9.90098	4.12218e-23	5.67638e-22
ENSMUSG00000022389	Tef	21685	2256.4	-0.541693	0.0547118	-9.90084	4.12784e-23	5.67993e-22
ENSMUSG00000044533	Rps2	16898	8362.27	0.42612	0.0430414	9.90023	4.15302e-23	5.71032e-22
ENSMUSG00000019370	Calm3	12315	4501.82	0.651535	0.0658315	9.897	4.28938e-23	5.88904e-22
ENSMUSG00000008450	Nutf2	68051	3088.06	0.49267	0.0498291	9.8872	4.73096e-23	6.49048e-22
ENSMUSG00000025429	Pstpip2	19201	988.26	0.859894	0.0869874	9.88527	4.823e-23	6.61184e-22
ENSMUSG00000029394	Cdk2ap1	13445	2049.17	0.692164	0.0700285	9.88403	4.88299e-23	6.68911e-22
ENSMUSG00000038482	Tfdp1	21781	2827.61	0.565934	0.057282	9.87979	5.09397e-23	6.97296e-22
ENSMUSG00000024074	Crim1	50766	2405.05	-0.654454	0.0662521	-9.87825	5.1729e-23	7.07577e-22
ENSMUSG00000037936	Scarb1	20778	2792.33	-0.501082	0.0507525	-9.87305	5.448e-23	7.44654e-22
ENSMUSG00000071637	Cebpd	12609	1567.34	1.16492	0.118001	9.87214	5.49802e-23	7.50935e-22
ENSMUSG00000005161	Prdx2	21672	4932.6	0.391471	0.039659	9.8709	5.56628e-23	7.59697e-22
ENSMUSG00000059810	Rgs3	50780	806.029	0.844076	0.0855224	9.86965	5.63618e-23	7.68668e-22
ENSMUSG00000027227	Sord	20322	3052.51	-0.522465	0.052954	-9.86639	5.82226e-23	7.9346e-22
ENSMUSG00000032126	Hmbs	15288	1992.91	0.494808	0.0501781	9.86104	6.14116e-23	8.36303e-22
ENSMUSG00000005779	Psmb4	19172	3592.74	0.488184	0.0495094	9.86044	6.17772e-23	8.40662e-22
ENSMUSG00000028678	Kif2c	73804	358.196	1.61249	0.163549	9.85941	6.2417e-23	8.48742e-22
ENSMUSG00000038859	Baiap2l1	66898	322.886	-1.39285	0.141276	-9.85906	6.26299e-23	8.51011e-22
ENSMUSG00000020023	Tmcc3	319880	4138.5	-0.806723	0.081853	-9.85575	6.47295e-23	8.78894e-22
ENSMUSG00000024013	Fgd2	26382	2244.45	-0.726387	0.0737087	-9.85484	6.53189e-23	8.86244e-22
ENSMUSG00000037966	Ninj1	18081	21685	0.431599	0.043797	9.85453	6.55249e-23	8.88386e-22
ENSMUSG00000033713	Foxn3	71375	2130.89	-0.641644	0.0651598	-9.84723	7.04612e-23	9.54612e-22
ENSMUSG00000018965	Ywhah	22629	17749.6	0.328571	0.0333675	9.84701	7.06122e-23	9.55957e-22
ENSMUSG00000021737	Psmd6	66413	3988.57	0.406915	0.0413258	9.84651	7.09641e-23	9.60017e-22
ENSMUSG00000051212	Gpr183	321019	2262.08	-0.813079	0.0825817	-9.84575	7.15023e-23	9.6659e-22
ENSMUSG00000031068	Glrx3	30926	2872.95	0.42486	0.0431693	9.84172	7.44279e-23	1.0054e-21
ENSMUSG00000009575	Cbx5	12419	1713.34	0.834362	0.0847923	9.84007	7.56606e-23	1.02131e-21
ENSMUSG00000041870	Ankrd13a	68420	9426.94	0.436456	0.0443718	9.83633	7.85267e-23	1.05922e-21
ENSMUSG00000062981	Mrpl42	67270	1864.02	0.567397	0.0576894	9.83538	7.92659e-23	1.06841e-21
ENSMUSG00000074476	Spc24	67629	140.136	1.74179	0.177097	9.83523	7.93844e-23	1.06923e-21
ENSMUSG00000017631	Abr	109934	13173.9	0.346801	0.0352697	9.83284	8.12968e-23	1.09419e-21
ENSMUSG00000031729	Ist1	71955	3954.66	-0.408766	0.0416115	-9.82341	8.92752e-23	1.2007e-21
ENSMUSG00000006715	Gmnn	57441	669.964	0.801306	0.081623	9.81716	9.49848e-23	1.27656e-21
ENSMUSG00000038388	Mpp6	56524	1667.51	0.530364	0.0540477	9.81289	9.90894e-23	1.33075e-21
ENSMUSG00000019088	Dnase1l1	69537	4202.75	-0.453972	0.0462939	-9.80632	1.05756e-22	1.41925e-21
ENSMUSG00000008429	Herpud2	80517	4153.48	-0.358079	0.0365417	-9.79917	1.13517e-22	1.5223e-21
ENSMUSG00000032193	Ldlr	16835	3389.58	-0.550235	0.0561712	-9.79569	1.17492e-22	1.57447e-21
ENSMUSG00000004056	Akt2	11652	3284.1	-0.458133	0.0468083	-9.78744	1.27479e-22	1.70706e-21
ENSMUSG00000027671	Actl6a	56456	1555.12	0.539524	0.0551353	9.78546	1.3e-22	1.73956e-21
ENSMUSG00000022378	Fam49b	223601	7687.57	0.326118	0.0333323	9.78383	1.32116e-22	1.76658e-21
ENSMUSG00000030162	Olr1	108078	135.113	4.21674	0.431256	9.77782	1.40198e-22	1.87329e-21
ENSMUSG00000049751	Rpl36al	66483	4430.7	0.545982	0.0558537	9.77521	1.43856e-22	1.92079e-21
ENSMUSG00000032113	Chek1	12649	125.551	2.01302	0.206	9.77193	1.48596e-22	1.98264e-21
ENSMUSG00000070738	Dgkd	227333	9009.05	-0.341984	0.035002	-9.77039	1.50869e-22	2.01152e-21
ENSMUSG00000019814	Ltv1	353258	1375.51	0.64474	0.0659917	9.77002	1.51423e-22	2.01745e-21
ENSMUSG00000028708	Mknk1	17346	4397.93	-0.445224	0.0455747	-9.7691	1.52796e-22	2.03427e-21
ENSMUSG00000082319	Gm8822	667799	6012.89	0.442714	0.0453655	9.75883	1.69098e-22	2.24969e-21
ENSMUSG00000044583	Tlr7	170743	11393.3	-0.503035	0.0516116	-9.74655	1.90837e-22	2.53707e-21
ENSMUSG00000078974	Sec61g	20335	1359.45	0.751299	0.0771742	9.73511	2.13588e-22	2.8375e-21
ENSMUSG00000069622	Gm10273	100039174	2813.96	0.595989	0.0612224	9.73481	2.14222e-22	2.84387e-21
ENSMUSG00000030591	Psmd8	57296	10934	0.326624	0.0335597	9.73262	2.18874e-22	2.90354e-21
ENSMUSG00000030663	1110004F10Rik	56372	3154.5	0.449658	0.0462511	9.7221	2.42733e-22	3.21774e-21
ENSMUSG00000032370	Lactb	80907	936.043	0.709955	0.0730921	9.71315	2.6502e-22	3.51065e-21
ENSMUSG00000030729	Pgm2l1	70974	824.678	0.712867	0.0734042	9.71152	2.6928e-22	3.56453e-21
ENSMUSG00000032518	Rpsa	16785	9284.3	0.486371	0.0500971	9.70858	2.77176e-22	3.66643e-21
ENSMUSG00000045751	Mms22l	212377	454.618	1.10433	0.113797	9.70439	2.88797e-22	3.81741e-21
ENSMUSG00000026389	Steap3	68428	1622.35	0.764852	0.078953	9.68743	3.40994e-22	4.50415e-21
ENSMUSG00000031231	Cox7b	66142	2773.64	0.503509	0.0519807	9.68647	3.44237e-22	4.54373e-21
ENSMUSG00000020385	Clk4	12750	1831.99	-0.815891	0.0842324	-9.68619	3.4518e-22	4.55292e-21
ENSMUSG00000007817	Zmiz1	328365	8741.85	-0.452167	0.0466886	-9.68474	3.50091e-22	4.61441e-21
ENSMUSG00000029223	Uchl1	22223	96.5543	2.36369	0.244101	9.68325	3.55244e-22	4.67899e-21
ENSMUSG00000020806	Rhbdf2	217344	6730.92	0.605145	0.0625044	9.68165	3.60855e-22	4.7495e-21
ENSMUSG00000024451	Arap3	106952	5149.08	0.428633	0.044313	9.67283	3.93333e-22	5.17328e-21
ENSMUSG00000052949	Rnf157	217340	951.486	0.720745	0.0745153	9.67244	3.94847e-22	5.1895e-21
ENSMUSG00000034255	Arhgap27	544817	1508.02	-0.747279	0.0772617	-9.67204	3.96382e-22	5.20596e-21
ENSMUSG00000045639	Zfp629	320683	1081.32	-0.898656	0.092948	-9.66837	4.10852e-22	5.39217e-21
ENSMUSG00000005615	Pcyt1a	13026	4273.11	-0.453972	0.0469582	-9.66757	4.14092e-22	5.43084e-21
ENSMUSG00000034855	Cxcl10	15945	1149.05	4.03646	0.41758	9.6663	4.19262e-22	5.49474e-21
ENSMUSG00000026480	Ncf2	17970	12323.5	0.367684	0.0380429	9.665	4.2461e-22	5.56088e-21
ENSMUSG00000019782	Rwdd1	66521	1521.64	0.604097	0.0625356	9.66005	4.45641e-22	5.83218e-21
ENSMUSG00000046207	Pik3r6	104709	1521.63	0.773672	0.0800949	9.65945	4.48279e-22	5.86255e-21
ENSMUSG00000069049	Eif2s3y	26908	656.56	0.871002	0.0901841	9.65805	4.54448e-22	5.93902e-21
ENSMUSG00000033732	Sf3b3	101943	5205.81	0.422431	0.0437547	9.65452	4.70375e-22	6.14282e-21
ENSMUSG00000000440	Pparg	19016	439.512	-1.30336	0.135028	-9.65248	4.79805e-22	6.26154e-21
ENSMUSG00000095427	Rps2-ps6	100043752	1311.96	0.58617	0.0607386	9.6507	4.88203e-22	6.36663e-21
ENSMUSG00000021127	Zfp36l1	12192	1528.81	-0.928962	0.0962595	-9.6506	4.88709e-22	6.36874e-21
ENSMUSG00000047414	Flrt2	399558	1694.79	-0.787392	0.0816355	-9.64521	5.1504e-22	6.70714e-21
ENSMUSG00000022201	Zfr	22763	5213.95	-0.37077	0.0384655	-9.63903	5.47004e-22	7.11838e-21
ENSMUSG00000020808	Pimreg	109212	246.146	1.69319	0.175768	9.63314	5.79328e-22	7.53372e-21
ENSMUSG00000029162	Khk	16548	668.396	-0.828205	0.0859775	-9.63281	5.81186e-22	7.55255e-21
ENSMUSG00000022969	Il10rb	16155	6106.95	-0.335691	0.0348645	-9.62844	6.06417e-22	7.87489e-21
ENSMUSG00000076435	Acsf2	264895	638.384	-0.756362	0.0785568	-9.62822	6.07737e-22	7.88649e-21
ENSMUSG00000030609	Aen	68048	1211.05	0.670282	0.069618	9.628	6.09027e-22	7.89768e-21
ENSMUSG00000081251	Gm12164	633082	4101.2	0.516701	0.0536672	9.62789	6.09696e-22	7.9008e-21
ENSMUSG00000028385	Snx30	209131	3795.24	-0.47874	0.0497344	-9.62594	6.21376e-22	8.04651e-21
ENSMUSG00000094737	Gm17045	100417766	374.694	1.0768	0.111866	9.62585	6.21885e-22	8.04746e-21
ENSMUSG00000038379	Ttk	22137	186.937	1.72369	0.17909	9.62468	6.2904e-22	8.13436e-21
ENSMUSG00000021965	Ska3	219114	198.757	1.72763	0.179538	9.62269	6.41347e-22	8.28769e-21
ENSMUSG00000031613	Hpgd	15446	6804.45	-1.6542	0.171955	-9.61994	6.58696e-22	8.50593e-21
ENSMUSG00000051285	Pcmtd1	319263	3435.74	-0.487168	0.050646	-9.61909	6.64191e-22	8.5709e-21
ENSMUSG00000056069	Otulinl	223433	6088.36	-0.546431	0.0568967	-9.60391	7.69648e-22	9.9248e-21
ENSMUSG00000026192	Atic	108147	770.266	0.794184	0.0826979	9.60344	7.73177e-22	9.96335e-21
ENSMUSG00000005251	Ripk4	72388	149.492	-1.93369	0.201366	-9.60289	7.77349e-22	1.00101e-20
ENSMUSG00000028228	Cpne3	70568	8392.31	-0.382871	0.0398757	-9.6016	7.87103e-22	1.01287e-20
ENSMUSG00000040746	Rnf167	70510	1886.85	-0.709526	0.0739411	-9.59582	8.32497e-22	1.07054e-20
ENSMUSG00000028793	Rnf19b	75234	5755.24	0.570222	0.059457	9.59049	8.76657e-22	1.12654e-20
ENSMUSG00000018171	Vmp1	75909	5952.16	0.49056	0.0512031	9.58067	9.64189e-22	1.23816e-20
ENSMUSG00000047798	Cd300lf	246746	1375.92	1.04879	0.109512	9.57693	9.99718e-22	1.28289e-20
ENSMUSG00000026317	Cln8	26889	9152.64	-0.4252	0.0444273	-9.5707	1.0618e-21	1.36066e-20
ENSMUSG00000045312	Lhfpl2	218454	20662.2	-0.514934	0.053803	-9.57073	1.06152e-21	1.36066e-20
ENSMUSG00000069899	Gm12166	100039624	2815.72	-0.539743	0.0564415	-9.56286	1.14543e-21	1.46681e-20
ENSMUSG00000026662	Sephs1	109079	2025.64	0.498086	0.0521229	9.55598	1.22416e-21	1.56655e-20
ENSMUSG00000031153	Gripap1	54645	3092.24	0.470969	0.049294	9.55427	1.24458e-21	1.59158e-20
ENSMUSG00000047810	Ccdc88b	78317	3478.7	0.767852	0.0803744	9.55344	1.25464e-21	1.60333e-20
ENSMUSG00000044783	Hjurp	381280	1409.43	0.762443	0.0798209	9.55192	1.2731e-21	1.6258e-20
ENSMUSG00000040462	Os9	216440	10482.1	-0.348636	0.0365171	-9.54722	1.33221e-21	1.70011e-20
ENSMUSG00000058704	Memo1	76890	1502.52	0.579544	0.0607256	9.54365	1.37886e-21	1.75843e-20
ENSMUSG00000030161	Gabarapl1	57436	5381.93	-0.559262	0.0586129	-9.54161	1.40627e-21	1.79214e-20
ENSMUSG00000002718	Cse1l	110750	4104.12	0.480947	0.0504178	9.53922	1.43906e-21	1.83267e-20
ENSMUSG00000032238	Rora	19883	836.977	-0.867645	0.0911113	-9.52291	1.6839e-21	2.14299e-20
ENSMUSG00000029714	Gigyf1	57330	846.619	-0.783663	0.0823237	-9.5193	1.74358e-21	2.21742e-20
ENSMUSG00000026228	Htr2b	15559	794.789	-1.24878	0.131318	-9.50961	1.9138e-21	2.43222e-20
ENSMUSG00000090213	Tmem189	407243	9804.6	-0.371191	0.0390467	-9.50634	1.97483e-21	2.50806e-20
ENSMUSG00000037300	Ttc13	234875	3423.46	0.44244	0.0465601	9.50255	2.04816e-21	2.59941e-20
ENSMUSG00000020409	Slu7	193116	3585.72	-0.453295	0.0477089	-9.50127	2.0734e-21	2.62963e-20
ENSMUSG00000022272	Myo10	17909	4171.46	0.634582	0.0668077	9.49863	2.12667e-21	2.69533e-20
ENSMUSG00000025364	Pa2g4	18813	1808.01	0.544432	0.0573304	9.49639	2.173e-21	2.75216e-20
ENSMUSG00000029175	Slc35f6	74919	5755.03	-0.396896	0.0418346	-9.48727	2.37175e-21	3.00183e-20
ENSMUSG00000018425	Dhx40	67487	1216.92	-0.554832	0.058507	-9.48318	2.46642e-21	3.11951e-20
ENSMUSG00000039852	Rere	68703	2304.32	-0.733658	0.0773774	-9.48156	2.50506e-21	3.16622e-20
ENSMUSG00000033319	Fem1c	240263	3546.96	-0.51223	0.0540338	-9.47982	2.54718e-21	3.21725e-20
ENSMUSG00000024404	Riok3	66878	9491.32	0.436283	0.0460663	9.47075	2.77842e-21	3.50692e-20
ENSMUSG00000016487	Ppfibp1	67533	3790.77	0.605105	0.0639143	9.46743	2.86803e-21	3.61756e-20
ENSMUSG00000036905	C1qb	12260	95045.4	-0.340958	0.0360262	-9.46419	2.95859e-21	3.72924e-20
ENSMUSG00000078453	Abracl	73112	820.918	0.833648	0.0881894	9.45293	3.2948e-21	4.15018e-20
ENSMUSG00000046186	Cd109	235505	250.808	1.46339	0.154905	9.44696	3.48808e-21	4.39065e-20
ENSMUSG00000027363	Usp8	84092	9759.37	-0.382047	0.0404424	-9.44669	3.49712e-21	4.39904e-20
ENSMUSG00000028864	Hgf	15234	600.611	-1.05769	0.112035	-9.44069	3.70327e-21	4.65519e-20
ENSMUSG00000029777	Gars	353172	5126.94	0.383775	0.0406652	9.43743	3.82029e-21	4.79901e-20
ENSMUSG00000028926	Cdk14	18647	5570.96	0.390207	0.0413535	9.4359	3.87669e-21	4.86655e-20
ENSMUSG00000060147	Serpinb6a	20719	9383.88	-0.479259	0.0507995	-9.43433	3.93517e-21	4.93661e-20
ENSMUSG00000033207	Mamdc2	71738	238.9	-1.40777	0.149247	-9.43249	4.00484e-21	5.02059e-20
ENSMUSG00000020089	Ppa1	67895	645.224	1.14173	0.121111	9.42717	4.21298e-21	5.27794e-20
ENSMUSG00000079225	Gm9531	671392	1509.77	0.683268	0.0724805	9.42692	4.22293e-21	5.28682e-20
ENSMUSG00000005034	Prkacb	18749	8085.99	-0.413222	0.0438604	-9.42129	4.45587e-21	5.57466e-20
ENSMUSG00000001138	Cnnm3	94218	2176.97	-0.513509	0.054524	-9.41803	4.59609e-21	5.7462e-20
ENSMUSG00000039987	Phtf2	68770	1784.9	0.590759	0.0627433	9.4155	4.70846e-21	5.88271e-20
ENSMUSG00000028964	Park7	57320	3445.98	0.435654	0.0462862	9.41219	4.85903e-21	6.06262e-20
ENSMUSG00000069662	Marcks	17118	21328.6	-0.407424	0.0432866	-9.41225	4.85648e-21	6.06262e-20
ENSMUSG00000052738	Suclg1	56451	2520.76	0.446854	0.0474815	9.41113	4.90824e-21	6.11989e-20
ENSMUSG00000038085	Cnbd2	70873	515.645	1.10773	0.11776	9.4067	5.11967e-21	6.37921e-20
ENSMUSG00000061897	Gm14292	100043168	867.141	0.63903	0.0680203	9.39469	5.73839e-21	7.14532e-20
ENSMUSG00000020190	Mknk2	17347	5801.09	-0.490973	0.0522682	-9.39334	5.81276e-21	7.23304e-20
ENSMUSG00000029765	Plxna4	243743	1166.89	-0.991902	0.105609	-9.39224	5.87395e-21	7.30427e-20
ENSMUSG00000035683	Melk	17279	351.834	1.33937	0.142729	9.38399	6.35213e-21	7.89356e-20
ENSMUSG00000049775	Tmsb4x	19241	182999	0.452624	0.048237	9.38332	6.3926e-21	7.93852e-20
ENSMUSG00000028343	Erp44	76299	4292.05	0.536992	0.0573563	9.36238	7.79597e-21	9.67475e-20
ENSMUSG00000000732	Icosl	50723	2848.82	0.832613	0.0889564	9.35978	7.99017e-21	9.9091e-20
ENSMUSG00000029863	Casp2	12366	1265.47	-0.658999	0.0704211	-9.35797	8.12821e-21	1.00735e-19
ENSMUSG00000024097	Srsf7	225027	3494.98	0.405605	0.0433615	9.35402	8.43746e-21	1.04498e-19
ENSMUSG00000029553	Tfec	21426	731.845	1.13825	0.121753	9.34884	8.86145e-21	1.09675e-19
ENSMUSG00000023988	Bysl	53414	958.669	0.810874	0.086736	9.34875	8.86872e-21	1.09692e-19
ENSMUSG00000024048	Myl12a	67268	10549.6	0.36938	0.0395157	9.34769	8.95852e-21	1.10728e-19
ENSMUSG00000031812	Map1lc3b	67443	13559	-0.401135	0.0429586	-9.33771	9.84396e-21	1.21591e-19
ENSMUSG00000047407	Tgif1	21815	5170.92	-0.371217	0.0398039	-9.32614	1.098e-20	1.35532e-19
ENSMUSG00000028556	Dock7	67299	5588.18	0.618788	0.0664027	9.31871	1.17759e-20	1.4526e-19
ENSMUSG00000059248	2021-09-09	53860	4648.2	0.411456	0.044158	9.31782	1.18759e-20	1.46395e-19
ENSMUSG00000022788	Fgd4	224014	2678.6	-0.700012	0.0751288	-9.31749	1.19127e-20	1.46751e-19
ENSMUSG00000027287	Snap23	20619	8759.69	-0.295783	0.0317503	-9.31589	1.20929e-20	1.48872e-19
ENSMUSG00000021832	Psmc6	67089	3576.56	0.431246	0.0463032	9.31352	1.23665e-20	1.52139e-19
ENSMUSG00000033808	Tmem87a	211499	2277.81	-0.545629	0.0585863	-9.31324	1.23988e-20	1.52434e-19
ENSMUSG00000086583	Gm15500	100043295	3833.37	0.443224	0.0476033	9.31079	1.26887e-20	1.55894e-19
ENSMUSG00000043895	S1pr2	14739	8130.18	-0.359607	0.0386232	-9.31065	1.27056e-20	1.55992e-19
ENSMUSG00000099875	Rbm3-ps	100043257	421.734	1.15583	0.124142	9.31058	1.27135e-20	1.55992e-19
ENSMUSG00000031652	N4bp1	80750	2732.22	0.67888	0.0729807	9.30219	1.37588e-20	1.68705e-19
ENSMUSG00000048285	Frmd6	319710	692.778	-0.818998	0.0880642	-9.30001	1.40434e-20	1.72081e-19
ENSMUSG00000028630	Dyrk2	69181	1184.92	-0.62885	0.0676346	-9.29777	1.43423e-20	1.75626e-19
ENSMUSG00000044894	Uqcrq	22272	2690.59	0.674931	0.0725985	9.29676	1.44794e-20	1.77187e-19
ENSMUSG00000036278	Macrod1	107227	327.606	-1.248	0.134285	-9.29368	1.4904e-20	1.82263e-19
ENSMUSG00000079260	Tmppe	100504715	1754.41	-0.521965	0.0561654	-9.29337	1.49483e-20	1.82684e-19
ENSMUSG00000070960	Gm19680	100503415	874.3	-0.866888	0.0933079	-9.29061	1.53402e-20	1.87349e-19
ENSMUSG00000028517	Plpp3	67916	614.09	1.0166	0.109561	9.2789	1.71242e-20	2.08999e-19
ENSMUSG00000026260	Ndufa10	67273	3162.99	0.374449	0.0403696	9.2755	1.76788e-20	2.15625e-19
ENSMUSG00000054920	Klhl5	71778	3489.97	0.419092	0.0452107	9.26977	1.86546e-20	2.27377e-19
ENSMUSG00000024952	Rps6ka4	56613	5616.73	0.606441	0.0654243	9.26935	1.87286e-20	2.28128e-19
ENSMUSG00000020849	Ywhae	22627	11736.9	0.349483	0.0377103	9.26757	1.90434e-20	2.3181e-19
ENSMUSG00000032698	Lmo2	16909	9523.52	-0.317224	0.0342435	-9.26378	1.97313e-20	2.40025e-19
ENSMUSG00000007815	Rhoa	11848	15669.6	0.496158	0.0535728	9.26137	2.01823e-20	2.4535e-19
ENSMUSG00000029550	Sppl3	74585	3744.61	-0.408578	0.0441395	-9.25653	2.11188e-20	2.56566e-19
ENSMUSG00000053581	Zfand2a	100494	4424.36	-0.466004	0.0503484	-9.25559	2.13058e-20	2.58667e-19
ENSMUSG00000033488	Cryzl2	226527	565.229	0.809893	0.0875548	9.25012	2.2424e-20	2.72064e-19
ENSMUSG00000017146	Brca1	12189	345.429	1.32029	0.142748	9.24906	2.26466e-20	2.74584e-19
ENSMUSG00000029470	P2rx4	18438	28428	-0.272226	0.0294495	-9.2438	2.37893e-20	2.8825e-19
ENSMUSG00000034349	Smc4	70099	1416.77	0.631932	0.068403	9.23836	2.503e-20	3.03084e-19
ENSMUSG00000061062	Gm10093	15181	1286.84	0.681274	0.0737692	9.2352	2.57802e-20	3.11964e-19
ENSMUSG00000021112	Mpp5	56217	1701.95	-0.659037	0.0713832	-9.23238	2.64676e-20	3.20073e-19
ENSMUSG00000078249	Hmga1b	111241	2761.45	0.644191	0.0698069	9.22819	2.7525e-20	3.32642e-19
ENSMUSG00000062248	Cks2	66197	339.366	0.97503	0.105668	9.22733	2.7745e-20	3.35081e-19
ENSMUSG00000026305	Lrrfip1	16978	5331.09	0.493514	0.0534963	9.2252	2.83021e-20	3.41585e-19
ENSMUSG00000020709	Adap2	216991	4324.72	-0.419034	0.045424	-9.22494	2.83716e-20	3.41799e-19
ENSMUSG00000021585	Cast	12380	3262.1	0.514424	0.0557641	9.225	2.83556e-20	3.41799e-19
ENSMUSG00000072789	Gm10420	108169197	1478.78	0.605022	0.0655856	9.22493	2.83752e-20	3.41799e-19
ENSMUSG00000073557	Ppp1r12b	329251	1158.26	0.804019	0.0871593	9.2247	2.84345e-20	3.42289e-19
ENSMUSG00000022639	Dubr	68190	483.012	0.925762	0.100452	9.21592	3.08616e-20	3.71264e-19
ENSMUSG00000031467	Agpat5	52123	3269.09	0.578688	0.0628166	9.21234	3.19091e-20	3.83615e-19
ENSMUSG00000030269	Mtmr14	97287	4299.44	0.507067	0.0550551	9.21017	3.25596e-20	3.91181e-19
ENSMUSG00000030357	Fkbp4	14228	3631.74	0.4784	0.0519454	9.20966	3.27166e-20	3.92812e-19
ENSMUSG00000022111	Uchl3	50933	730.606	0.733651	0.0796779	9.20771	3.33163e-20	3.99753e-19
ENSMUSG00000027326	Knl1	76464	266.604	1.38729	0.150715	9.20473	3.42547e-20	4.10745e-19
ENSMUSG00000068165	Gm10233	100043675	2359.98	0.587554	0.0638524	9.20175	3.52182e-20	4.22024e-19
ENSMUSG00000026832	Cytip	227929	387.461	-1.56335	0.169965	-9.19808	3.64392e-20	4.36372e-19
ENSMUSG00000018326	Ywhab	54401	14440.1	0.282224	0.030691	9.19568	3.72643e-20	4.45964e-19
ENSMUSG00000021756	Il6st	16195	5512.89	-0.608715	0.0662004	-9.19504	3.74839e-20	4.48302e-19
ENSMUSG00000094111	Nutf2-ps2	621832	1109.25	0.615949	0.0670315	9.18895	3.96685e-20	4.74122e-19
ENSMUSG00000030148	Clec4a2	26888	1125.51	0.814802	0.0886862	9.18747	4.02178e-20	4.80376e-19
ENSMUSG00000026683	Nuf2	66977	340.334	1.30096	0.141669	9.18308	4.18917e-20	5.00047e-19
ENSMUSG00000034522	Zfp395	380912	930.937	-0.816704	0.0889671	-9.17985	4.31689e-20	5.14959e-19
ENSMUSG00000004980	Hnrnpa2b1	53379	18230.7	0.314993	0.0343745	9.16359	5.01999e-20	5.98445e-19
ENSMUSG00000032554	Trf	22041	774.53	-0.95526	0.104264	-9.1619	5.09934e-20	6.07512e-19
ENSMUSG00000028927	Padi2	18600	405.141	-0.911809	0.0995904	-9.15558	5.40643e-20	6.43683e-19
ENSMUSG00000036622	Atp13a2	74772	21840	-0.37021	0.0404408	-9.15437	5.46745e-20	6.50528e-19
ENSMUSG00000020021	Fgd6	13998	1584.32	-0.589148	0.0643889	-9.14984	5.70193e-20	6.7799e-19
ENSMUSG00000028064	Sema4a	20351	1024.47	0.799962	0.0875979	9.13221	6.71142e-20	7.97511e-19
ENSMUSG00000005893	Nr2c2	22026	1600.36	-0.696075	0.0762307	-9.13116	6.7767e-20	8.04749e-19
ENSMUSG00000069893	9930111J21Rik1	667214	6825	-0.660094	0.0723138	-9.12819	6.96557e-20	8.26646e-19
ENSMUSG00000022498	Txndc11	106200	2067.41	0.593389	0.065031	9.12471	7.1928e-20	8.53065e-19
ENSMUSG00000022377	Asap1	13196	7868.18	-0.452842	0.0496431	-9.12195	7.37861e-20	8.74541e-19
ENSMUSG00000002326	Gmpr2	105446	2270.66	0.474851	0.052057	9.12174	7.39299e-20	8.75683e-19
ENSMUSG00000037458	Azin1	54375	5792.3	0.450434	0.0494308	9.11241	8.05696e-20	9.53717e-19
ENSMUSG00000079101	Esd-ps	100040682	353.354	1.06011	0.116399	9.10752	8.42886e-20	9.971e-19
ENSMUSG00000043415	Otud1	71198	781.657	-0.694545	0.0762746	-9.10584	8.55994e-20	1.01196e-18
ENSMUSG00000022553	Maf1	68877	5893.55	-0.391902	0.0430435	-9.10478	8.64399e-20	1.02124e-18
ENSMUSG00000024538	Ppic	19038	486.923	1.11457	0.122433	9.10351	8.74569e-20	1.0326e-18
ENSMUSG00000029994	Anxa4	11746	17204.4	0.324905	0.0357056	9.09955	9.07099e-20	1.07032e-18
ENSMUSG00000025428	Atp5a1	11946	22693.7	0.293456	0.0322568	9.0975	9.24309e-20	1.08993e-18
ENSMUSG00000072893	4933439C10Rik	74476	243.726	-1.4971	0.164607	-9.09498	9.46077e-20	1.11489e-18
ENSMUSG00000028639	Ybx1	22608	17439.5	0.325725	0.0358151	9.09464	9.49009e-20	1.11763e-18
ENSMUSG00000040618	Pck2	74551	2027.28	-0.515246	0.056656	-9.0943	9.51959e-20	1.12039e-18
ENSMUSG00000028669	Pithd1	66193	1518.29	-0.54299	0.0597307	-9.09062	9.84728e-20	1.15822e-18
ENSMUSG00000034773	BC030867	217216	83.3637	2.15012	0.236546	9.08963	9.93764e-20	1.1681e-18
ENSMUSG00000023106	Denr	68184	2336.08	0.531469	0.0584983	9.0852	1.03506e-19	1.21587e-18
ENSMUSG00000091705	H2-Q2	15013	624.906	-0.925	0.101822	-9.08448	1.04192e-19	1.22314e-18
ENSMUSG00000022360	Atad2	70472	2932.4	0.670336	0.0737901	9.08436	1.04313e-19	1.22379e-18
ENSMUSG00000052459	Atp6v1a	11964	29246.2	-0.423757	0.0466502	-9.0837	1.04942e-19	1.23039e-18
ENSMUSG00000028633	Ctps	51797	364.644	1.68712	0.185793	9.08065	1.07927e-19	1.26458e-18
ENSMUSG00000032436	Cmtm7	102545	3237.49	0.419636	0.0462275	9.07764	1.10956e-19	1.29925e-18
ENSMUSG00000015112	Slc25a13	50799	790.994	0.827108	0.0911611	9.07304	1.15746e-19	1.35448e-18
ENSMUSG00000028709	Mob3c	100465	1518.6	-0.617635	0.0680853	-9.0715	1.17394e-19	1.37289e-18
ENSMUSG00000069892	9930111J21Rik2	245240	7986.89	-0.656238	0.0723564	-9.06951	1.19549e-19	1.39721e-18
ENSMUSG00000048758	Rpl29	19944	2959.17	0.558591	0.0615926	9.06911	1.19992e-19	1.4015e-18
ENSMUSG00000035105	Egln3	112407	492.929	0.987728	0.109159	9.04856	1.44866e-19	1.69096e-18
ENSMUSG00000020402	Vdac1	22333	5257.05	0.555588	0.0614215	9.04551	1.48975e-19	1.73782e-18
ENSMUSG00000036568	Bicral	210982	1025.88	-0.732436	0.0810001	-9.04241	1.53258e-19	1.78665e-18
ENSMUSG00000024966	Stip1	20867	3882.46	0.421445	0.0466303	9.03801	1.59549e-19	1.85882e-18
ENSMUSG00000032405	Pias1	56469	4528.14	-0.439647	0.0486622	-9.03466	1.64514e-19	1.91545e-18
ENSMUSG00000018398	2021-09-08	20362	7857.38	-0.34163	0.0378218	-9.03263	1.67597e-19	1.95013e-18
ENSMUSG00000028680	Plk3	12795	1659.94	0.584098	0.0646744	9.03135	1.69562e-19	1.97174e-18
ENSMUSG00000028671	Gale	74246	347.114	1.03802	0.114966	9.02896	1.73313e-19	2.01283e-18
ENSMUSG00000031826	Usp10	22224	1834.88	0.553382	0.0612894	9.029	1.73244e-19	2.01283e-18
ENSMUSG00000023919	Cenpq	83815	145.794	1.45344	0.160989	9.02816	1.74582e-19	2.0263e-18
ENSMUSG00000027555	Car13	71934	807.029	0.967749	0.107203	9.02724	1.7605e-19	2.04205e-18
ENSMUSG00000032423	Syncrip	56403	2714.66	0.437266	0.0484616	9.02293	1.83118e-19	2.1227e-18
ENSMUSG00000095115	Itpripl2	319622	4258.24	0.503123	0.0557659	9.02206	1.84593e-19	2.13845e-18
ENSMUSG00000042182	Bend6	320705	217.953	1.42734	0.158228	9.02077	1.86767e-19	2.16229e-18
ENSMUSG00000039748	Exo1	26909	149.016	1.90133	0.211132	9.00542	2.14837e-19	2.4857e-18
ENSMUSG00000034424	Gcsh	68133	1536.9	0.574942	0.0638596	9.00322	2.19191e-19	2.5329e-18
ENSMUSG00000027244	Atg13	51897	2862.11	-0.406192	0.0451221	-9.00205	2.21544e-19	2.5585e-18
ENSMUSG00000021266	Wars	22375	4379.47	0.429424	0.0477042	9.00181	2.22032e-19	2.56253e-18
ENSMUSG00000073676	Hspe1	15528	1780.41	0.528119	0.0586954	8.99762	2.30659e-19	2.66043e-18
ENSMUSG00000074781	Ube2n	93765	5147.35	0.413492	0.0459811	8.99266	2.41328e-19	2.78175e-18
ENSMUSG00000028261	Ndufaf4	68493	648.026	0.787107	0.0875291	8.99253	2.41611e-19	2.78328e-18
ENSMUSG00000013622	Atraid	381629	2542.69	-0.423532	0.0470996	-8.99225	2.42211e-19	2.78845e-18
ENSMUSG00000064267	Hvcn1	74096	8694.15	0.410133	0.0456213	8.98995	2.47351e-19	2.84584e-18
ENSMUSG00000074743	Thbd	21824	484.722	-1.68866	0.187867	-8.98863	2.50329e-19	2.87831e-18
ENSMUSG00000034271	Jdp2	81703	1022.2	0.748289	0.0832682	8.98649	2.55247e-19	2.93304e-18
ENSMUSG00000031781	Ciapin1	109006	1191.85	0.712364	0.0792848	8.98487	2.59033e-19	2.97469e-18
ENSMUSG00000022372	Sla	20491	3421.71	0.488199	0.0544456	8.96674	3.05432e-19	3.50535e-18
ENSMUSG00000059005	Hnrnpa3	229279	3013.01	0.449616	0.0501603	8.96359	3.1427e-19	3.60454e-18
ENSMUSG00000029038	Ssu72	68991	2885.68	-0.404562	0.0451443	-8.96152	3.20222e-19	3.67053e-18
ENSMUSG00000059326	Csf2ra	12982	5055.98	0.708206	0.0790821	8.95533	3.38722e-19	3.88018e-18
ENSMUSG00000034850	Tmem127	69470	7154.89	-0.377541	0.0421587	-8.95524	3.38986e-19	3.88079e-18
ENSMUSG00000019920	Lims1	110829	6334.61	0.423549	0.0473237	8.95003	3.55376e-19	4.06591e-18
ENSMUSG00000033898	Cfhr2	545366	599.209	-0.763838	0.0853642	-8.94799	3.6203e-19	4.13947e-18
ENSMUSG00000028668	Eloa	27224	5501.03	-0.41677	0.0465832	-8.94679	3.65966e-19	4.18189e-18
ENSMUSG00000000982	Ccl3	20302	5288.33	0.719146	0.0804416	8.93997	3.89277e-19	4.4455e-18
ENSMUSG00000075010	AW112010	107350	1373.6	0.985059	0.1102	8.93883	3.93308e-19	4.48877e-18
ENSMUSG00000026779	Mastl	67121	206.667	1.42862	0.159933	8.93264	4.15959e-19	4.74141e-18
ENSMUSG00000020592	Sdc1	20969	382.505	1.39141	0.155811	8.93012	4.25563e-19	4.84789e-18
ENSMUSG00000022962	Gart	14450	2196.36	0.484557	0.0542694	8.92873	4.30918e-19	4.90588e-18
ENSMUSG00000021242	Npc2	67963	21424.5	-0.343084	0.0384364	-8.92601	4.41646e-19	5.02492e-18
ENSMUSG00000067274	Rplp0	11837	15821.9	0.358944	0.040247	8.91854	4.72493e-19	5.37258e-18
ENSMUSG00000030603	Psmc4	23996	3917.47	0.4088	0.0459461	8.8974	5.71725e-19	6.4969e-18
ENSMUSG00000007050	Lsm2	27756	623.027	0.770809	0.086648	8.89587	5.79638e-19	6.58278e-18
ENSMUSG00000004187	Kifc2	16581	173.873	-1.48446	0.166946	-8.89181	6.01227e-19	6.82376e-18
ENSMUSG00000026822	Lcn2	16819	304.096	4.1374	0.465677	8.8847	6.40929e-19	7.2699e-18
ENSMUSG00000021185	Dglucy	217830	1652.88	0.537088	0.0604523	8.88449	6.4215e-19	7.27927e-18
ENSMUSG00000075266	Cenpw	66311	131.358	1.61298	0.181553	8.88434	6.43006e-19	7.28451e-18
ENSMUSG00000040188	Scamp2	24044	11285.2	-0.43415	0.0488706	-8.88367	6.46872e-19	7.32381e-18
ENSMUSG00000079139	Gm4204	100043064	1059.54	0.603556	0.0679453	8.88297	6.51007e-19	7.36612e-18
ENSMUSG00000003992	Ssbp2	66970	458.384	-1.1148	0.125546	-8.87959	6.71044e-19	7.58818e-18
ENSMUSG00000066979	Bub3	12237	3984.41	0.34077	0.0383968	8.87496	6.99597e-19	7.90622e-18
ENSMUSG00000032336	Nptn	20320	10054	-0.372101	0.0419783	-8.86415	7.70904e-19	8.70674e-18
ENSMUSG00000002289	Angptl4	57875	368	-1.38369	0.156329	-8.85111	8.66529e-19	9.78077e-18
ENSMUSG00000064127	Med14	26896	1849.44	0.568366	0.0642509	8.84605	9.06692e-19	1.02278e-17
ENSMUSG00000028063	Lmna	16905	2885.15	0.539327	0.061005	8.84069	9.51284e-19	1.07243e-17
ENSMUSG00000002984	Tomm40	53333	1556.46	0.625948	0.0708075	8.84013	9.56077e-19	1.07693e-17
ENSMUSG00000004451	Ralb	64143	7450.67	0.350203	0.0396154	8.84009	9.56438e-19	1.07693e-17
ENSMUSG00000029684	Wasl	73178	1204.61	-0.619416	0.0700965	-8.83662	9.86611e-19	1.11022e-17
ENSMUSG00000020708	Psmc5	19184	4068.49	0.451446	0.0511099	8.83284	1.02053e-18	1.14769e-17
ENSMUSG00000032557	Uba5	66663	2492.51	0.454226	0.0514307	8.83181	1.02993e-18	1.15755e-17
ENSMUSG00000038175	Mylip	218203	7026.83	-0.38928	0.0440842	-8.83039	1.0431e-18	1.17165e-17
ENSMUSG00000039911	Spsb1	74646	730.862	-0.898213	0.101768	-8.82606	1.08427e-18	1.21715e-17
ENSMUSG00000059824	Dbp	13170	161.436	-1.398	0.158399	-8.82578	1.08703e-18	1.21951e-17
ENSMUSG00000038028	Tigar	319801	513.108	0.848843	0.0961899	8.82466	1.0979e-18	1.23095e-17
ENSMUSG00000035232	Pdk3	236900	793.646	0.665396	0.0754557	8.81836	1.16143e-18	1.3014e-17
ENSMUSG00000025025	Mxi1	17859	2139.95	-0.704406	0.0799027	-8.81581	1.18828e-18	1.33067e-17
ENSMUSG00000086851	A430108G06Rik	319650	141.93	-1.97525	0.224181	-8.81099	1.24047e-18	1.38828e-17
ENSMUSG00000096472	Cdkn2d	12581	556.336	0.743245	0.084428	8.8033	1.32849e-18	1.48588e-17
ENSMUSG00000038811	Gngt2	14710	1937.54	0.524449	0.0595971	8.7999	1.36944e-18	1.53075e-17
ENSMUSG00000018924	Alox15	11687	2424.71	-0.45726	0.0519748	-8.79772	1.39622e-18	1.55974e-17
ENSMUSG00000001794	Capns1	12336	7078.63	0.349357	0.0397128	8.79711	1.4039e-18	1.56643e-17
ENSMUSG00000031570	Plpp5	71910	737.42	0.75919	0.0863044	8.79665	1.40959e-18	1.57183e-17
ENSMUSG00000026737	Pip4k2a	18718	5600.56	-0.340934	0.0387831	-8.79079	1.48517e-18	1.65511e-17
ENSMUSG00000001665	Gstt3	103140	185.68	-1.21986	0.1389	-8.78234	1.60103e-18	1.78208e-17
ENSMUSG00000054752	Fsd1l	319636	250.604	1.21794	0.13869	8.78177	1.60917e-18	1.79005e-17
ENSMUSG00000039168	Dap	223453	3312.04	0.392112	0.0446604	8.77985	1.63687e-18	1.81977e-17
ENSMUSG00000021707	Dhfr	13361	299.493	1.22458	0.139526	8.77671	1.68323e-18	1.87019e-17
ENSMUSG00000031447	Lamp1	16783	120048	-0.301819	0.0343902	-8.77631	1.68924e-18	1.87574e-17
ENSMUSG00000026103	Gls	14660	4485.01	0.483695	0.0551274	8.77413	1.72236e-18	1.91137e-17
ENSMUSG00000034602	Mon2	67074	1879.99	-0.488697	0.0557294	-8.7691	1.80103e-18	1.99746e-17
ENSMUSG00000041354	Rgl2	19732	6362.71	-0.705474	0.0804571	-8.76832	1.81346e-18	2.01005e-17
ENSMUSG00000021610	Clptm1l	218335	9977.11	0.302293	0.0344918	8.76421	1.88084e-18	2.08348e-17
ENSMUSG00000021998	Lcp1	18826	73984.7	0.255549	0.0291761	8.75884	1.97266e-18	2.18388e-17
ENSMUSG00000061731	Ext1	14042	1836.79	0.557982	0.0637173	8.75716	2.0023e-18	2.21536e-17
ENSMUSG00000000751	Rpa1	68275	2476.92	0.618167	0.0706128	8.75432	2.0534e-18	2.27055e-17
ENSMUSG00000024811	Tnks2	74493	12886.5	-0.399527	0.0456391	-8.75406	2.05807e-18	2.27435e-17
ENSMUSG00000010651	Acaa1b	235674	742.662	0.925595	0.105781	8.75008	2.13206e-18	2.3547e-17
ENSMUSG00000026873	Phf19	74016	83.9945	1.92101	0.219709	8.74341	2.26187e-18	2.49657e-17
ENSMUSG00000029456	Acad10	71985	466.211	-0.831124	0.0950792	-8.74139	2.3027e-18	2.54012e-17
ENSMUSG00000048216	Gpr85	64450	171.012	1.8224	0.208539	8.73889	2.3541e-18	2.59527e-17
ENSMUSG00000037851	Iars	105148	5598.33	0.411868	0.0471311	8.73877	2.35653e-18	2.59641e-17
ENSMUSG00000073678	Pgap1	241062	2677.67	-0.488479	0.0559065	-8.73743	2.38472e-18	2.62589e-17
ENSMUSG00000044330	Gm9790	100042265	180.781	1.38727	0.158822	8.73474	2.44212e-18	2.6875e-17
ENSMUSG00000040152	Thbs1	21825	3098.68	-1.24213	0.142217	-8.73403	2.45746e-18	2.70276e-17
ENSMUSG00000026509	Capn2	12334	1368.44	0.612748	0.0701656	8.73288	2.48275e-18	2.72896e-17
ENSMUSG00000018169	Mfng	17305	1485.23	-0.644806	0.0738493	-8.73138	2.51592e-18	2.76378e-17
ENSMUSG00000019966	Kitl	17311	1866.77	-0.582732	0.0667494	-8.73014	2.54364e-18	2.79256e-17
ENSMUSG00000029066	Mrpl20	66448	1570.66	0.55346	0.0634229	8.7265	2.62667e-18	2.882e-17
ENSMUSG00000032740	Ccdc88a	108686	1798.73	0.623436	0.0714638	8.7238	2.69013e-18	2.94988e-17
ENSMUSG00000006732	Mettl1	17299	252.972	1.16531	0.133647	8.71935	2.79811e-18	3.06646e-17
ENSMUSG00000043008	Klhl6	239743	2898.37	-0.455756	0.0522703	-8.71922	2.80131e-18	3.06815e-17
ENSMUSG00000048234	Rnf149	67702	11851	0.393438	0.0451242	8.71901	2.80657e-18	3.07209e-17
ENSMUSG00000074361	C5ar2	319430	276.276	-1.45903	0.167345	-8.71873	2.81331e-18	3.07764e-17
ENSMUSG00000030094	Xpc	22591	1524.62	-0.589034	0.0676053	-8.71284	2.96349e-18	3.24001e-17
ENSMUSG00000022148	Fyb	23880	9355.38	0.375798	0.0431639	8.7063	3.13952e-18	3.42841e-17
ENSMUSG00000035992	Fnip1	216742	4946.62	-0.543651	0.062443	-8.70635	3.13806e-18	3.42841e-17
ENSMUSG00000059208	Hnrnpm	76936	6838.85	0.343142	0.0394229	8.70413	3.20023e-18	3.49264e-17
ENSMUSG00000026358	Rgs1	50778	2446.58	-0.696604	0.0800541	-8.70167	3.27025e-18	3.56695e-17
ENSMUSG00000038387	Rras	20130	1892.62	0.512652	0.0589496	8.69644	3.42453e-18	3.73302e-17
ENSMUSG00000005813	Metap1	75624	1779.33	0.515552	0.0592909	8.6953	3.45917e-18	3.76856e-17
ENSMUSG00000027010	Slc25a12	78830	2531.22	0.595746	0.0685828	8.68652	3.73715e-18	4.069e-17
ENSMUSG00000050619	Zscan29	99334	2365.96	-0.448853	0.0516736	-8.68631	3.74398e-18	4.07196e-17
ENSMUSG00000056724	Nbeal2	235627	2236.13	0.667422	0.0768362	8.6863	3.74428e-18	4.07196e-17
ENSMUSG00000070942	Il1rl2	107527	603.6	0.891523	0.102658	8.68437	3.80862e-18	4.13949e-17
ENSMUSG00000034757	Tmub2	72053	2239.18	-0.470031	0.05414	-8.68177	3.89658e-18	4.23261e-17
ENSMUSG00000018750	Zbtb4	75580	1267.2	-0.629913	0.0725812	-8.67873	4.00215e-18	4.34473e-17
ENSMUSG00000003808	Farsa	66590	2303.71	0.419821	0.0483845	8.67677	4.07163e-18	4.41755e-17
ENSMUSG00000024052	Lpin2	64898	6881.65	-0.486967	0.0561513	-8.6724	4.23118e-18	4.58796e-17
ENSMUSG00000052566	Hook2	170833	1599.93	-0.608264	0.0702321	-8.66077	4.68596e-18	5.0781e-17
ENSMUSG00000026203	Dnajb2	56812	612.597	-0.819981	0.0946799	-8.66056	4.69457e-18	5.08446e-17
ENSMUSG00000027613	Eif6	16418	4174.18	0.488025	0.056355	8.65984	4.72426e-18	5.11361e-17
ENSMUSG00000003037	Rab8a	17274	6772.79	0.329573	0.0380643	8.65832	4.78749e-18	5.17901e-17
ENSMUSG00000062580	Timm17a	21854	1945.69	0.491706	0.0567936	8.65778	4.81046e-18	5.20082e-17
ENSMUSG00000031634	Ufsp2	192169	2600.1	0.459389	0.053149	8.64342	5.45544e-18	5.89468e-17
ENSMUSG00000022257	Laptm4b	114128	914.649	-0.64	0.0740674	-8.64078	5.58316e-18	6.02916e-17
ENSMUSG00000095865	Gm13237	666390	492.297	0.885844	0.102531	8.63976	5.63332e-18	6.07977e-17
ENSMUSG00000056579	Tug1	544752	5051.91	-0.436981	0.0505964	-8.63661	5.79071e-18	6.24598e-17
ENSMUSG00000084957	Bbip1	100503572	1176.76	0.577391	0.066871	8.63441	5.90325e-18	6.36366e-17
ENSMUSG00000044627	Swi5	72931	3332.52	0.427895	0.0495896	8.62873	6.20368e-18	6.68361e-17
ENSMUSG00000045098	Kmt5b	225888	2304.6	-0.489	0.0566735	-8.62838	6.22282e-18	6.70033e-17
ENSMUSG00000090124	Ugt1a7c	394432	3829.38	-0.376623	0.0436647	-8.62535	6.38981e-18	6.87612e-17
ENSMUSG00000026004	Kansl1l	68691	955.624	-0.754563	0.0875567	-8.61799	6.81391e-18	7.32823e-17
ENSMUSG00000025869	Nop16	28126	1047.01	0.587885	0.0682323	8.61593	6.93751e-18	7.45681e-17
ENSMUSG00000068876	Cgn	70737	105.386	-1.88297	0.218757	-8.60759	7.46154e-18	8.01541e-17
ENSMUSG00000033697	Arhgap39	223666	1595.69	-0.634014	0.0736607	-8.60722	7.48519e-18	8.03614e-17
ENSMUSG00000024855	Pacs1	107975	3617.63	-0.438	0.0509014	-8.60486	7.64115e-18	8.19881e-17
ENSMUSG00000027175	Tcp11l1	320554	1336.81	0.701724	0.0815587	8.60391	7.7046e-18	8.26208e-17
ENSMUSG00000004455	Ppp1cc	19047	14975.8	-0.368144	0.0427988	-8.60173	7.85264e-18	8.41595e-17
ENSMUSG00000040688	Tbl3	213773	1719.15	0.480122	0.0558198	8.60128	7.88331e-18	8.44392e-17
ENSMUSG00000029787	Avl9	78937	3243.74	-0.552505	0.0642562	-8.59847	8.07879e-18	8.64829e-17
ENSMUSG00000028334	Nans	94181	1667.34	0.611831	0.0711897	8.59437	8.37227e-18	8.95726e-17
ENSMUSG00000034024	Cct2	12461	4735.43	0.35034	0.0407654	8.59404	8.39634e-18	8.97782e-17
ENSMUSG00000058922	Gm10052	654467	757.617	0.820257	0.0954469	8.59386	8.40955e-18	8.98673e-17
ENSMUSG00000004264	Phb2	12034	2701.3	0.401927	0.0467696	8.59378	8.41563e-18	8.98803e-17
ENSMUSG00000058126	Tpm3-rs7	621054	9783.82	0.343337	0.039963	8.59138	8.5929e-18	9.17206e-17
ENSMUSG00000067106	Gm5529	433326	415.943	0.992428	0.115552	8.58857	8.80559e-18	9.39365e-17
ENSMUSG00000027282	Mtch2	56428	4540.07	0.38799	0.0451758	8.58846	8.81451e-18	9.39774e-17
ENSMUSG00000049090	Zadh2	225791	1493.77	0.659254	0.0768173	8.58211	9.31485e-18	9.92545e-17
ENSMUSG00000052688	Rab7b	226421	11418.5	-0.331211	0.0385964	-8.5814	9.37256e-18	9.98118e-17
ENSMUSG00000097164	Cep83os	67723	469.381	-0.994181	0.115867	-8.58034	9.45926e-18	1.00677e-16
ENSMUSG00000078154	Gm12184	100039945	1031.2	0.627932	0.0731908	8.57938	9.53873e-18	1.01464e-16
ENSMUSG00000029472	Anapc5	59008	9845.87	0.315025	0.0367358	8.57542	9.87229e-18	1.04952e-16
ENSMUSG00000031924	Cyb5b	66427	6075.4	0.391977	0.0457747	8.56318	1.09795e-17	1.16656e-16
ENSMUSG00000031007	Atp6ap2	70495	17667.7	0.29895	0.0349147	8.5623	1.10641e-17	1.17487e-16
ENSMUSG00000078941	Ak6	102216272	507.864	0.842186	0.0983751	8.56097	1.11923e-17	1.18779e-16
ENSMUSG00000048574	Ccnb1-ps	434175	145.946	1.60502	0.187483	8.56086	1.12029e-17	1.18824e-16
ENSMUSG00000022664	Slc35a5	74102	3360.37	-0.428222	0.0500278	-8.55969	1.13173e-17	1.19969e-16
ENSMUSG00000037991	Rmi2	223970	30.3449	4.69732	0.548878	8.55803	1.14811e-17	1.21635e-16
ENSMUSG00000006134	Crkl	12929	3198.83	-0.424737	0.0496381	-8.55668	1.16162e-17	1.22925e-16
ENSMUSG00000024177	Nme4	56520	882.683	-0.621196	0.0726143	-8.55473	1.18142e-17	1.24949e-16
ENSMUSG00000032010	Usp2	53376	428.254	-0.831105	0.0971525	-8.55464	1.18234e-17	1.24975e-16
ENSMUSG00000037697	Ddhd1	114874	1178.05	0.870376	0.101765	8.55282	1.20114e-17	1.2689e-16
ENSMUSG00000021733	Slc4a7	218756	2828.69	0.48877	0.0571753	8.54863	1.24557e-17	1.31507e-16
ENSMUSG00000020307	Cdc34	216150	1890.62	0.566129	0.066235	8.54727	1.26032e-17	1.32989e-16
ENSMUSG00000020053	Igf1	16000	57017.4	0.254571	0.0297876	8.54621	1.27201e-17	1.34146e-16
ENSMUSG00000081833	Gm13669	623453	117.263	1.7053	0.19961	8.54318	1.30575e-17	1.37626e-16
ENSMUSG00000078652	Psme3	19192	5023.44	0.341139	0.0399322	8.54295	1.30838e-17	1.37824e-16
ENSMUSG00000067194	Eif1ax	66235	2837.91	0.465507	0.0545147	8.53912	1.35245e-17	1.42386e-16
ENSMUSG00000037419	Endod1	71946	765.335	0.695299	0.0814543	8.53606	1.38882e-17	1.4613e-16
ENSMUSG00000018446	C1qbp	12261	2185.66	0.514585	0.0603224	8.53058	1.45619e-17	1.53132e-16
ENSMUSG00000074738	Fndc10	230991	265.074	-1.05575	0.123889	-8.52175	1.57163e-17	1.65177e-16
ENSMUSG00000023908	Pkmyt1	268930	177.216	1.64841	0.19349	8.51936	1.60435e-17	1.68521e-16
ENSMUSG00000020361	Hspa4	15525	7734.33	0.420245	0.0493338	8.51841	1.61754e-17	1.69809e-16
ENSMUSG00000038279	Nop2	110109	1867.31	0.485052	0.0569592	8.51578	1.65467e-17	1.73609e-16
ENSMUSG00000038147	Cd84	12523	30071.8	-0.385503	0.0452745	-8.51478	1.66912e-17	1.75025e-16
ENSMUSG00000001467	Cyp51	13121	1432.69	-0.613983	0.0721797	-8.50631	1.79549e-17	1.8817e-16
ENSMUSG00000018143	Mafk	17135	2331.56	-0.646503	0.0760124	-8.50524	1.8122e-17	1.89813e-16
ENSMUSG00000034329	Brip1	237911	251.996	1.40359	0.165057	8.5037	1.83649e-17	1.92248e-16
ENSMUSG00000025486	Sirt3	64384	389.114	-0.953009	0.112081	-8.50289	1.84935e-17	1.93485e-16
ENSMUSG00000058291	Zfp68	24135	1850.34	-0.502507	0.0591026	-8.50228	1.85899e-17	1.94274e-16
ENSMUSG00000025137	Pcyt2	68671	1617.93	-0.512199	0.0602551	-8.5005	1.88771e-17	1.97163e-16
ENSMUSG00000001751	Naglu	27419	10068.5	-0.348342	0.0409906	-8.4981	1.92713e-17	2.01166e-16
ENSMUSG00000029153	Ociad2	433904	199.882	-1.28522	0.151287	-8.49528	1.97457e-17	2.06002e-16
ENSMUSG00000069565	Dazap1	70248	1191.91	0.549002	0.0646746	8.48868	2.08992e-17	2.17913e-16
ENSMUSG00000034674	Tdg	21665	2070.18	0.470601	0.0554443	8.48781	2.10565e-17	2.1943e-16
ENSMUSG00000032366	Tpm1	22003	1773.12	0.544292	0.0641413	8.48582	2.14198e-17	2.23089e-16
ENSMUSG00000021290	Atp5mpl	70257	2211.94	0.505294	0.0595461	8.48575	2.14336e-17	2.23108e-16
ENSMUSG00000022564	Grina	66168	10120	-0.308534	0.0363712	-8.48291	2.19633e-17	2.28493e-16
ENSMUSG00000070939	Tgfbrap1	73122	2938.42	-0.486374	0.0573774	-8.47676	2.31544e-17	2.40749e-16
ENSMUSG00000014606	Slc25a11	67863	6986.97	0.312831	0.0369142	8.47454	2.36016e-17	2.4526e-16
ENSMUSG00000008475	Arpc5	67771	30008.7	0.271878	0.0320987	8.47006	2.45275e-17	2.54738e-16
ENSMUSG00000028088	Fmo5	14263	622.593	-0.737895	0.0871261	-8.46927	2.46937e-17	2.56321e-16
ENSMUSG00000026748	Plxdc2	67448	9039.41	-0.491903	0.0580934	-8.46744	2.50842e-17	2.60227e-16
ENSMUSG00000019947	Arid5b	71371	1703.01	-0.72024	0.0850836	-8.46508	2.55977e-17	2.65405e-16
ENSMUSG00000027108	Ola1	67059	1575.44	0.53604	0.0633474	8.46191	2.63034e-17	2.72417e-16
ENSMUSG00000030352	Tspan9	109246	379.401	-1.15605	0.136618	-8.46191	2.63026e-17	2.72417e-16
ENSMUSG00000020653	Klf11	194655	946.837	-0.756165	0.0893653	-8.4615	2.63954e-17	2.73216e-16
ENSMUSG00000042426	Dhx29	218629	1170.41	0.610821	0.0722376	8.45572	2.7738e-17	2.86953e-16
ENSMUSG00000025395	Prim1	19075	409.408	0.917967	0.108571	8.45498	2.79137e-17	2.88608e-16
ENSMUSG00000032913	Lrig2	269473	1555.37	-0.596967	0.0706217	-8.45302	2.83854e-17	2.93321e-16
ENSMUSG00000017428	Psmd11	69077	3062.66	0.486174	0.0575394	8.44942	2.92751e-17	3.02346e-16
ENSMUSG00000050410	Tcf19	106795	299.524	1.31154	0.155336	8.44322	3.08702e-17	3.18641e-16
ENSMUSG00000060376	Bckdha	12039	2232.86	-0.597656	0.0707984	-8.44167	3.12847e-17	3.22739e-16
ENSMUSG00000036461	Elf1	13709	3816.26	-0.360993	0.0427667	-8.44099	3.14649e-17	3.24417e-16
ENSMUSG00000038252	Ncapd2	68298	821.481	0.926806	0.10986	8.43629	3.27579e-17	3.3756e-16
ENSMUSG00000038375	Trp53inp2	68728	6398.39	-0.319509	0.0378813	-8.4345	3.32625e-17	3.42569e-16
ENSMUSG00000031833	Mast3	546071	3308.84	-0.400312	0.0474759	-8.43189	3.40116e-17	3.50088e-16
ENSMUSG00000036501	Fam13b	225358	2337.47	-0.430209	0.0510284	-8.43078	3.43361e-17	3.53231e-16
ENSMUSG00000050103	Agmo	319660	502.308	-0.79512	0.0943207	-8.42996	3.4578e-17	3.55521e-16
ENSMUSG00000006998	Psmd2	21762	16645	0.340863	0.040439	8.42905	3.48488e-17	3.58107e-16
ENSMUSG00000053219	Raet1e	379043	98.3397	1.84682	0.219144	8.42739	3.53447e-17	3.63001e-16
ENSMUSG00000004071	Cdip1	66626	1994.36	-0.55899	0.0663352	-8.42674	3.55437e-17	3.64842e-16
ENSMUSG00000072082	Ccnf	12449	522.945	1.04299	0.123858	8.42085	3.73761e-17	3.83437e-16
ENSMUSG00000040269	Mrps28	66230	721.069	0.732268	0.0870142	8.4155	3.91227e-17	4.01132e-16
ENSMUSG00000032420	Nt5e	23959	363.032	1.36152	0.161888	8.41026	4.09107e-17	4.19233e-16
ENSMUSG00000062203	Gspt1	14852	3543.74	0.424883	0.0505275	8.40895	4.13703e-17	4.23707e-16
ENSMUSG00000062075	Lmnb2	16907	855.38	0.631067	0.0750705	8.40633	4.23023e-17	4.33012e-16
ENSMUSG00000004040	Stat3	20848	8253.15	-0.475616	0.0565871	-8.40503	4.27768e-17	4.37626e-16
ENSMUSG00000028277	Ube2j1	56228	4652.12	0.496129	0.0590375	8.40363	4.32878e-17	4.42609e-16
ENSMUSG00000030447	Cyfip1	20430	37920.2	0.313415	0.0373037	8.40172	4.39992e-17	4.49634e-16
ENSMUSG00000015176	Nolc1	70769	1744.24	0.528458	0.062916	8.39942	4.48694e-17	4.58274e-16
ENSMUSG00000079057	Cyp4v3	102294	5253.39	-0.344618	0.0410429	-8.39652	4.59888e-17	4.69447e-16
ENSMUSG00000022141	Nipbl	71175	2201.6	-0.603885	0.0719766	-8.39002	4.86077e-17	4.95906e-16
ENSMUSG00000020377	Ltc4s	17001	141.095	-1.50287	0.179254	-8.38402	5.11513e-17	5.2128e-16
ENSMUSG00000020737	Jpt1	15374	6342.67	0.396674	0.0473193	8.38293	5.16251e-17	5.25818e-16
ENSMUSG00000036353	P2ry12	70839	1301.72	-0.723739	0.0863547	-8.381	5.24799e-17	5.34231e-16
ENSMUSG00000052419	2610001J05Rik	66520	3554.48	0.33618	0.0401227	8.3788	5.34678e-17	5.43987e-16
ENSMUSG00000012422	Tmem167	66074	3575.07	0.45893	0.0547911	8.37599	5.47618e-17	5.56845e-16
ENSMUSG00000052331	Ankrd44	329154	3232.81	-0.562646	0.0672095	-8.37153	5.68751e-17	5.78016e-16
ENSMUSG00000020888	Dvl2	13543	991.931	-0.652747	0.0780564	-8.36251	6.13989e-17	6.23648e-16
ENSMUSG00000041132	N4bp2l1	100637	1289.82	-0.606419	0.0727006	-8.34132	7.3463e-17	7.45777e-16
ENSMUSG00000022241	Tars	110960	3588.81	0.397714	0.0476839	8.34064	7.38883e-17	7.49682e-16
ENSMUSG00000024691	Fam111a	107373	3977.35	0.430632	0.0516603	8.33584	7.69529e-17	7.80347e-16
ENSMUSG00000023175	Bsg	12215	13071.4	0.321435	0.0385765	8.33241	7.9211e-17	8.02805e-16
ENSMUSG00000027479	Mapre1	13589	10734.1	0.279455	0.0335389	8.33227	7.93074e-17	8.03341e-16
ENSMUSG00000093930	Hmgcs1	208715	3330.86	-0.490634	0.0589531	-8.32244	8.61672e-17	8.72348e-16
ENSMUSG00000071547	Nt5dc2	70021	4817.27	-0.390836	0.0469685	-8.32123	8.70562e-17	8.80866e-16
ENSMUSG00000046324	Ermp1	226090	1747.55	0.594746	0.0715486	8.31248	9.37211e-17	9.47784e-16
ENSMUSG00000026434	Nucks1	98415	4326.01	0.362064	0.0435577	8.31228	9.3884e-17	9.48912e-16
ENSMUSG00000068290	Ddrgk1	77006	2944.04	-0.384687	0.0462826	-8.31171	9.43307e-17	9.52905e-16
ENSMUSG00000075232	Amd1	11702	2127.66	0.449708	0.0541164	8.31001	9.56908e-17	9.66116e-16
ENSMUSG00000030091	Nup210	54563	393.256	1.26149	0.151848	8.3076	9.76535e-17	9.85393e-16
ENSMUSG00000028211	Trp53inp1	60599	2461.98	-0.910624	0.109691	-8.30175	1.02591e-16	1.03465e-15
ENSMUSG00000069094	Pde7a	18583	1255.05	-0.756719	0.0911547	-8.30148	1.02825e-16	1.03645e-15
ENSMUSG00000044345	Marveld1	277010	686.264	0.83487	0.100586	8.30002	1.04092e-16	1.04864e-15
ENSMUSG00000006423	C330007P06Rik	77644	3207.72	-0.44299	0.0533835	-8.29827	1.05639e-16	1.06365e-15
ENSMUSG00000062510	Nsl1	381318	269.095	1.04963	0.126519	8.29624	1.0746e-16	1.0814e-15
ENSMUSG00000037722	Gnpnat1	54342	807.131	0.721717	0.0870115	8.2945	1.09039e-16	1.09669e-15
ENSMUSG00000026421	Csrp1	13007	1813.21	0.475655	0.0573466	8.29438	1.09153e-16	1.09723e-15
ENSMUSG00000026727	Rsu1	20163	5472.38	0.29582	0.0356746	8.29216	1.11207e-16	1.11728e-15
ENSMUSG00000018474	Chd3	216848	1059.99	-0.666637	0.0804093	-8.29055	1.1273e-16	1.13196e-15
ENSMUSG00000063904	Dpp3	75221	5516.53	0.312585	0.0377151	8.28808	1.15092e-16	1.15505e-15
ENSMUSG00000039703	Nploc4	217365	7366.74	0.305161	0.0368345	8.28466	1.1845e-16	1.1881e-15
ENSMUSG00000070873	Lilra5	232801	377.235	0.809267	0.0977232	8.28122	1.21924e-16	1.22229e-15
ENSMUSG00000056501	Cebpb	12608	6188.3	1.10225	0.133112	8.28068	1.2247e-16	1.2271e-15
ENSMUSG00000039275	Foxk2	68837	1968.97	0.458775	0.0554101	8.27963	1.23555e-16	1.23729e-15
ENSMUSG00000056515	Rab31	106572	17165.2	-0.416467	0.050308	-8.27835	1.24895e-16	1.25003e-15
ENSMUSG00000030894	Tpp1	12751	32004.7	-0.239802	0.028968	-8.27818	1.25075e-16	1.25116e-15
ENSMUSG00000037149	Ddx1	104721	4669.02	0.459406	0.0554965	8.27811	1.25148e-16	1.25121e-15
ENSMUSG00000056708	Ier5	15939	4496.57	-0.582325	0.0704115	-8.27031	1.33614e-16	1.33513e-15
ENSMUSG00000045273	Cenph	26886	98.7015	1.79945	0.217611	8.26913	1.34945e-16	1.3477e-15
ENSMUSG00000015149	Sirt2	64383	5269.81	-0.310001	0.0375173	-8.26288	1.42203e-16	1.41941e-15
ENSMUSG00000044408	Sptssa	104725	10362.5	-0.335346	0.0406342	-8.25282	1.54703e-16	1.54335e-15
ENSMUSG00000032097	Ddx6	13209	2097.42	-0.512698	0.0621435	-8.25022	1.58105e-16	1.57644e-15
ENSMUSG00000031337	Mtm1	17772	1899.96	0.444339	0.0538596	8.24994	1.58471e-16	1.57924e-15
ENSMUSG00000002602	Axl	26362	15959.5	-0.432506	0.0524409	-8.2475	1.61749e-16	1.61103e-15
ENSMUSG00000058569	Tmed9	67511	7863.14	0.548864	0.0665617	8.24593	1.63875e-16	1.63133e-15
ENSMUSG00000032528	Vipr1	22354	89.1538	-2.42439	0.294077	-8.24406	1.66468e-16	1.65625e-15
ENSMUSG00000017652	Cd40	21939	1226.52	0.93292	0.113172	8.24341	1.67367e-16	1.6643e-15
ENSMUSG00000056592	Zfp658	210104	482.586	0.93427	0.113339	8.24316	1.67727e-16	1.66698e-15
ENSMUSG00000078162	Gm2574	100040053	215.917	1.26051	0.152925	8.24264	1.68449e-16	1.67326e-15
ENSMUSG00000053137	Mapk11	19094	53.3159	3.04528	0.369605	8.2393	1.73222e-16	1.71974e-15
ENSMUSG00000038967	Pdk2	18604	691.675	-0.65298	0.0792728	-8.23713	1.76386e-16	1.75021e-15
ENSMUSG00000032096	Arcn1	213827	13445	0.342049	0.0415462	8.23297	1.82622e-16	1.81111e-15
ENSMUSG00000053004	Hrh1	15465	189.217	-1.39	0.168852	-8.23202	1.84084e-16	1.82463e-15
ENSMUSG00000028759	Hp1bp3	15441	6647.57	-0.349206	0.042422	-8.23173	1.84522e-16	1.82799e-15
ENSMUSG00000047714	Ppp1r2	66849	2732.89	0.423743	0.0514787	8.23142	1.85e-16	1.83175e-15
ENSMUSG00000005973	Rcn1	19672	611.555	0.892252	0.108424	8.22926	1.88372e-16	1.86413e-15
ENSMUSG00000020671	Rab10	19325	17725	0.288166	0.035028	8.22674	1.92376e-16	1.90274e-15
ENSMUSG00000057388	Mrpl18	67681	1232.87	0.486266	0.0591391	8.22242	1.99436e-16	1.97151e-15
ENSMUSG00000047126	Cltc	67300	55291	-0.510489	0.0621383	-8.21537	2.11511e-16	2.08976e-15
ENSMUSG00000038168	P3h2	210530	49.8156	-3.27801	0.399021	-8.21512	2.11948e-16	2.09184e-15
ENSMUSG00000063193	Cd300lb	217304	6412.62	-0.516577	0.0628811	-8.21513	2.11926e-16	2.09184e-15
ENSMUSG00000010051	Hyal1	15586	330.197	-1.11942	0.136455	-8.20354	2.3341e-16	2.30243e-15
ENSMUSG00000015202	Cnksr3	215748	624.511	-0.818285	0.0997599	-8.20255	2.35338e-16	2.32021e-15
ENSMUSG00000020647	Ncoa1	17977	3168.5	-0.505737	0.0616661	-8.20123	2.37941e-16	2.34462e-15
ENSMUSG00000024677	Ms4a6b	69774	4318.65	-0.720669	0.0879085	-8.19794	2.44537e-16	2.40833e-15
ENSMUSG00000036875	Dna2	327762	602.892	0.880549	0.107431	8.19643	2.4763e-16	2.4375e-15
ENSMUSG00000025138	Sirt7	209011	2695.92	-0.489433	0.0597162	-8.19599	2.48544e-16	2.44518e-15
ENSMUSG00000028675	Pnrc2	52830	3116.82	-0.361444	0.0441048	-8.19512	2.50339e-16	2.46154e-15
ENSMUSG00000030335	Mrpl51	66493	1915.44	0.402835	0.0491617	8.19408	2.52524e-16	2.4817e-15
ENSMUSG00000034708	Grn	14824	137199	-0.383102	0.0467808	-8.18929	2.62767e-16	2.58099e-15
ENSMUSG00000022180	Slc7a8	50934	12615	0.458168	0.0559499	8.18889	2.6364e-16	2.58758e-15
ENSMUSG00000078695	Cisd3	217149	565.613	0.761827	0.0930321	8.18886	2.63718e-16	2.58758e-15
ENSMUSG00000040725	Hnrnpul1	232989	5138.14	-0.345006	0.0421318	-8.18872	2.64023e-16	2.58919e-15
ENSMUSG00000031604	Msmo1	66234	3433.37	-0.44575	0.0544643	-8.18426	2.73974e-16	2.68535e-15
ENSMUSG00000025746	Il6	16193	58.943	3.68023	0.449798	8.18197	2.79252e-16	2.73563e-15
ENSMUSG00000039055	Eme1	268465	92.6596	1.74954	0.213903	8.17912	2.85916e-16	2.79943e-15
ENSMUSG00000024140	Epas1	13819	3271.27	-0.655071	0.0801067	-8.17748	2.8985e-16	2.83645e-15
ENSMUSG00000060261	Gtf2i	14886	3360.16	-0.470575	0.0575648	-8.1747	2.96594e-16	2.9009e-15
ENSMUSG00000038481	Cdk19	78334	2361.8	-0.543225	0.0664655	-8.17303	3.00729e-16	2.93979e-15
ENSMUSG00000057778	Cyb5d2	192986	612.682	-0.724508	0.0886621	-8.17157	3.0441e-16	2.9742e-15
ENSMUSG00000026622	Nek2	18005	298.139	1.42854	0.174843	8.17043	3.0729e-16	3.00075e-15
ENSMUSG00000040078	Ptges3-ps	100043508	1021.57	0.616399	0.0754882	8.16549	3.20122e-16	3.1244e-15
ENSMUSG00000026383	Epb41l5	226352	474.823	-1.0354	0.126842	-8.16288	3.27122e-16	3.19104e-15
ENSMUSG00000038545	Cul7	66515	858.648	-0.600564	0.0735754	-8.16256	3.28008e-16	3.19799e-15
ENSMUSG00000024791	Cdca5	67849	245.655	1.11135	0.136228	8.15799	3.40648e-16	3.31948e-15
ENSMUSG00000067203	H2-K2	630499	1266.02	-0.740441	0.0907722	-8.15714	3.43059e-16	3.34121e-15
ENSMUSG00000003865	Gys1	14936	1252.5	0.563654	0.0691218	8.15451	3.50602e-16	3.41287e-15
ENSMUSG00000030058	Copg1	54161	6077.24	0.343499	0.0421301	8.15329	3.54164e-16	3.44572e-15
ENSMUSG00000043192	Gm1840	669429	495.866	0.81626	0.100191	8.14703	3.72966e-16	3.62675e-15
ENSMUSG00000016252	Atp5e	67126	2123.65	0.56534	0.0693947	8.14673	3.73892e-16	3.63384e-15
ENSMUSG00000049744	Arhgap15	76117	713.696	-0.751565	0.0922753	-8.14481	3.79884e-16	3.69013e-15
ENSMUSG00000029416	Slc15a4	100561	3908.68	-0.457054	0.0561516	-8.13965	3.96433e-16	3.84886e-15
ENSMUSG00000051043	Gprc5c	70355	65.6393	-2.68436	0.330223	-8.12895	4.33042e-16	4.20208e-15
ENSMUSG00000030042	Pole4	66979	2310.23	0.430773	0.0530221	8.1244	4.49574e-16	4.3602e-15
ENSMUSG00000031232	Magt1	67075	5725.1	0.341623	0.0420668	8.12096	4.62499e-16	4.48321e-15
ENSMUSG00000025781	Atp5c1	11949	7669.54	0.28212	0.0347495	8.11866	4.71372e-16	4.56682e-15
ENSMUSG00000090841	Myl6	17904	11698.1	0.303439	0.0373764	8.11848	4.7205e-16	4.57099e-15
ENSMUSG00000044468	Tent5c	74645	2837.87	-0.507396	0.0625262	-8.11494	4.86039e-16	4.70398e-15
ENSMUSG00000030275	Etnk1	75320	7856.96	-0.548773	0.067631	-8.11423	4.88884e-16	4.72903e-15
ENSMUSG00000018909	Arrb1	109689	4508.25	0.421109	0.0519435	8.10705	5.18618e-16	5.01404e-15
ENSMUSG00000022724	Riox2	67014	858.194	0.712404	0.0878833	8.10625	5.2205e-16	5.04457e-15
ENSMUSG00000023940	Sgo1	72415	135.364	1.68726	0.208164	8.10541	5.25669e-16	5.07688e-15
ENSMUSG00000049470	Aff4	93736	5372.32	-0.486073	0.0599779	-8.10421	5.30876e-16	5.1245e-15
ENSMUSG00000073490	Ifi207	226691	9821.85	-0.940405	0.116053	-8.10325	5.35119e-16	5.16275e-15
ENSMUSG00000025040	Fundc1	72018	3019.49	-0.349807	0.0431917	-8.09894	5.54407e-16	5.34605e-15
ENSMUSG00000034445	Cyb561a3	225912	1878.26	-0.409585	0.0505918	-8.09588	5.68502e-16	5.4791e-15
ENSMUSG00000035900	Gramd4	223752	405.283	-0.855617	0.105693	-8.09531	5.7119e-16	5.50214e-15
ENSMUSG00000027663	Zmat3	22401	736.198	-0.783174	0.0967457	-8.09518	5.71782e-16	5.50496e-15
ENSMUSG00000060177	Klk1b22	13646	37.0391	-3.48266	0.430255	-8.09441	5.75408e-16	5.53699e-15
ENSMUSG00000041360	Pum3	52874	2201.68	0.521397	0.0644274	8.09278	5.83161e-16	5.60868e-15
ENSMUSG00000067235	H2-Q10	15007	460.045	-0.904436	0.111809	-8.08911	6.01044e-16	5.77766e-15
ENSMUSG00000037470	Uggt1	320011	8560.35	0.422527	0.0522351	8.08895	6.01829e-16	5.78219e-15
ENSMUSG00000026021	Sumo1	22218	4795	0.353769	0.0437392	8.08814	6.05803e-16	5.81735e-15
ENSMUSG00000029501	Ankle2	71782	4850.11	-0.534064	0.0660721	-8.08305	6.31691e-16	6.06279e-15
ENSMUSG00000020358	Hnrnpab	15384	4872.84	0.49527	0.0612986	8.07963	6.49649e-16	6.23191e-15
ENSMUSG00000038462	Uqcrfs1	66694	3729.15	0.376155	0.0465681	8.07754	6.60865e-16	6.33621e-15
ENSMUSG00000038806	Sde2	208768	1887.14	-0.459944	0.0569528	-8.07589	6.69874e-16	6.41925e-15
ENSMUSG00000068877	Selenbp2	20342	330.211	-1.13077	0.14007	-8.07292	6.86349e-16	6.57371e-15
ENSMUSG00000023031	Cela1	109901	692.779	-0.701744	0.0870599	-8.06046	7.60048e-16	7.27581e-15
ENSMUSG00000057729	Prtn3	19152	66.6119	-2.18894	0.271685	-8.05689	7.82588e-16	7.4877e-15
ENSMUSG00000097944	A130014A01Rik	402737	149.082	-1.34608	0.167088	-8.05614	7.87446e-16	7.53028e-15
ENSMUSG00000061024	Rrs1	59014	1545.52	0.636132	0.0789719	8.05517	7.93683e-16	7.58208e-15
ENSMUSG00000069516	Lyz2	17105	2.0869e+06	0.256148	0.0317991	8.05518	7.93609e-16	7.58208e-15
ENSMUSG00000039512	Uhrf1bp1	224648	3260.46	-0.545976	0.0677877	-8.0542	8.00006e-16	7.63853e-15
ENSMUSG00000032437	Stt3b	68292	9508.78	0.34629	0.0430195	8.04961	8.30583e-16	7.92638e-15
ENSMUSG00000030224	Strap	20901	5165.27	0.382963	0.0475803	8.04876	8.36364e-16	7.97742e-15
ENSMUSG00000025403	Shmt2	108037	2253.7	0.484674	0.0602817	8.04015	8.97277e-16	8.55401e-15
ENSMUSG00000047777	Phf13	230936	1744.43	-0.517395	0.0643813	-8.03642	9.25005e-16	8.8138e-15
ENSMUSG00000045165	AI467606	101602	1778.93	-0.4765	0.0593084	-8.03427	9.41376e-16	8.96516e-15
ENSMUSG00000070923	Klhl9	242521	3817.26	-0.437073	0.0544481	-8.02733	9.96136e-16	9.48178e-15
ENSMUSG00000021811	Dnajc9	108671	890.682	0.569269	0.0709422	8.02441	1.02011e-15	9.70499e-15
ENSMUSG00000024965	Fermt3	108101	18056.6	0.270339	0.0336968	8.0227	1.03446e-15	9.83643e-15
ENSMUSG00000006519	Cyba	13057	26479.1	0.374746	0.0467211	8.02091	1.04962e-15	9.9754e-15
ENSMUSG00000036053	Fmnl2	71409	383.239	1.11262	0.138737	8.0196	1.06091e-15	1.00776e-14
ENSMUSG00000032578	Cish	12700	93.048	2.59499	0.323597	8.01921	1.06425e-15	1.01041e-14
ENSMUSG00000024899	Papss2	23972	410.449	0.885869	0.110489	8.01774	1.07711e-15	1.02209e-14
ENSMUSG00000032018	Sc5d	235293	1666.44	-0.604837	0.0754468	-8.01673	1.08594e-15	1.02994e-14
ENSMUSG00000026202	Tuba4a	22145	2248.1	0.521641	0.0650981	8.01314	1.11812e-15	1.05992e-14
ENSMUSG00000008540	Mgst1	56615	9820.83	-0.340137	0.0424479	-8.01305	1.11894e-15	1.06015e-14
ENSMUSG00000070372	Capza1	12340	21570	0.303363	0.0378621	8.01233	1.12551e-15	1.06583e-14
ENSMUSG00000040274	Cdk6	12571	1285.06	0.829584	0.103558	8.01082	1.1395e-15	1.07853e-14
ENSMUSG00000020120	Plek	56193	48097.2	-0.316802	0.0395576	-8.00862	1.15999e-15	1.09736e-14
ENSMUSG00000046185	Zfp84	74352	1170.78	-0.615398	0.0768606	-8.00668	1.17845e-15	1.11424e-14
ENSMUSG00000059479	B3gnt8	232984	1277.17	-0.516805	0.0645473	-8.00661	1.17913e-15	1.11432e-14
ENSMUSG00000019806	Aig1	66253	1972.6	-0.556119	0.0694634	-8.00592	1.18573e-15	1.11998e-14
ENSMUSG00000017221	Psmd3	22123	4356.81	0.387028	0.0483592	8.0032	1.21222e-15	1.14442e-14
ENSMUSG00000042622	Maff	17133	258.167	1.70514	0.213072	8.00264	1.21778e-15	1.14908e-14
ENSMUSG00000073409	H2-Q6	110557	1190.67	-0.674181	0.0842564	-8.00154	1.22868e-15	1.15877e-14
ENSMUSG00000021520	Uqcrb	67530	3517.34	0.349148	0.043679	7.9935	1.31156e-15	1.23631e-14
ENSMUSG00000069682	Gm10275	19897	724.747	0.648258	0.0812568	7.9779	1.48845e-15	1.40233e-14
ENSMUSG00000002233	Rhoc	11853	5292.84	0.380518	0.0477055	7.97639	1.5068e-15	1.4189e-14
ENSMUSG00000032553	Srprb	20818	1780.55	0.442144	0.0554363	7.97571	1.51508e-15	1.42597e-14
ENSMUSG00000045251	Zfp688	69234	531.519	-0.950918	0.119238	-7.97497	1.52415e-15	1.43377e-14
ENSMUSG00000059323	Tonsl	72749	4954.69	0.294587	0.0369439	7.97389	1.53762e-15	1.4457e-14
ENSMUSG00000033610	Pank1	75735	465.001	-0.866316	0.108664	-7.97241	1.55609e-15	1.46233e-14
ENSMUSG00000022329	Stk3	56274	2123.98	0.495265	0.0621394	7.97023	1.58382e-15	1.48763e-14
ENSMUSG00000049848	Ceacam19	319930	35.7996	4.24916	0.533174	7.96956	1.59238e-15	1.49491e-14
ENSMUSG00000070780	Rbm47	245945	3968.99	-0.451898	0.056718	-7.96746	1.61969e-15	1.51978e-14
ENSMUSG00000082480	Gm11687	627160	630.072	0.615109	0.0772287	7.96477	1.65529e-15	1.5524e-14
ENSMUSG00000019960	Dusp6	67603	7203.26	0.383889	0.048216	7.96184	1.69494e-15	1.58877e-14
ENSMUSG00000026456	Cyb5r1	72017	5957.98	-0.333492	0.0418954	-7.96012	1.71875e-15	1.61027e-14
ENSMUSG00000015312	Gadd45b	17873	747.544	-1.02328	0.128648	-7.9541	1.80434e-15	1.6896e-14
ENSMUSG00000008668	Rps18	20084	5477.88	0.337124	0.0423948	7.95201	1.83512e-15	1.71755e-14
ENSMUSG00000037007	Zfp113	56314	386.653	-0.94449	0.118815	-7.94924	1.87664e-15	1.75553e-14
ENSMUSG00000031353	Rbbp7	245688	5328.8	0.318194	0.0400409	7.94674	1.91491e-15	1.79042e-14
ENSMUSG00000033684	Qsox1	104009	2093	0.527095	0.0663538	7.94371	1.96216e-15	1.83367e-14
ENSMUSG00000024055	Cyp4f13	170716	1034.71	-0.655918	0.0826081	-7.94012	2.01981e-15	1.88658e-14
ENSMUSG00000037369	Kdm6a	22289	2591.13	-0.553401	0.0697261	-7.93679	2.07488e-15	1.93704e-14
ENSMUSG00000020922	Lsm12	268490	1636.32	0.46572	0.0586933	7.93482	2.10807e-15	1.96704e-14
ENSMUSG00000040415	Dtx3	80904	1763.78	-0.660245	0.0832143	-7.93428	2.11727e-15	1.97462e-14
ENSMUSG00000024456	Diaph1	13367	1759.41	0.546378	0.0688824	7.93204	2.15577e-15	2.00952e-14
ENSMUSG00000018501	Ncor1	20185	5150.62	-0.387584	0.0488733	-7.93038	2.18469e-15	2.03544e-14
ENSMUSG00000032489	Kif9	16578	249.887	-1.29035	0.162736	-7.92912	2.20705e-15	2.05524e-14
ENSMUSG00000039116	Adgrg6	215798	68.7262	3.45256	0.435811	7.92215	2.33429e-15	2.17263e-14
ENSMUSG00000014504	Srp19	66384	1558.83	0.429472	0.0542304	7.9194	2.38663e-15	2.22023e-14
ENSMUSG00000089722	Cd300ld5	100043125	436.292	-0.764275	0.0965513	-7.91574	2.45784e-15	2.28533e-14
ENSMUSG00000059070	Rpl18	19899	4535.31	0.353257	0.0446443	7.9127	2.51868e-15	2.33953e-14
ENSMUSG00000081752	Sms-ps	671878	736.772	0.685604	0.0866456	7.91274	2.51783e-15	2.33953e-14
ENSMUSG00000022013	Dnajc15	66148	1346.78	0.521162	0.0658804	7.91072	2.55896e-15	2.37576e-14
ENSMUSG00000027331	Knstrn	51944	365.551	1.1016	0.139281	7.90923	2.58984e-15	2.40321e-14
ENSMUSG00000021327	Zkscan3	72739	2028.73	-0.494862	0.0626005	-7.90509	2.6774e-15	2.48322e-14
ENSMUSG00000024583	Txnl1	53382	3657.1	0.384721	0.0486804	7.90301	2.72255e-15	2.52382e-14
ENSMUSG00000022094	Slc39a14	213053	1687.78	0.562048	0.0711624	7.89811	2.8317e-15	2.62369e-14
ENSMUSG00000052837	Junb	16477	9553.75	0.626928	0.0793837	7.89744	2.84694e-15	2.63649e-14
ENSMUSG00000034248	Slc25a37	67712	1589.27	0.46213	0.058539	7.8944	2.91718e-15	2.70018e-14
ENSMUSG00000025366	Esyt1	23943	9249.1	0.338579	0.0428943	7.89333	2.94217e-15	2.72195e-14
ENSMUSG00000002102	Psmc3	19182	5807	0.308843	0.0391428	7.89017	3.01784e-15	2.79055e-14
ENSMUSG00000006019	Dhx34	71723	1037	-0.576046	0.0730743	-7.88302	3.19574e-15	2.95358e-14
ENSMUSG00000055172	C1ra	50909	680.731	0.622451	0.0789656	7.88256	3.20737e-15	2.96284e-14
ENSMUSG00000026080	Chst10	98388	1285.29	-0.760653	0.0965223	-7.88059	3.25834e-15	3.00842e-14
ENSMUSG00000071014	Ndufb6	230075	651.197	0.73896	0.0937892	7.87895	3.30147e-15	3.04673e-14
ENSMUSG00000032612	Usp4	22258	5609.57	0.336851	0.0427555	7.87855	3.31215e-15	3.05485e-14
ENSMUSG00000037725	Ckap2	80986	205.328	1.2718	0.161427	7.87849	3.31358e-15	3.05485e-14
ENSMUSG00000052942	Glis3	226075	142.276	-1.66454	0.211411	-7.87349	3.44874e-15	3.17628e-14
ENSMUSG00000033918	Parl	381038	1831.08	0.474325	0.0602695	7.87008	3.54428e-15	3.26265e-14
ENSMUSG00000028252	Ccnc	51813	1326.82	0.555138	0.0705435	7.86945	3.56204e-15	3.27736e-14
ENSMUSG00000026281	Dtymk	21915	746.231	0.710943	0.0903616	7.86775	3.61062e-15	3.3204e-14
ENSMUSG00000029592	Usp30	100756	1013.83	-0.650301	0.0826914	-7.86418	3.71515e-15	3.41484e-14
ENSMUSG00000039382	Wdr45	54636	1138.74	-0.633828	0.0806051	-7.86337	3.73929e-15	3.43531e-14
ENSMUSG00000029198	Grpel1	17713	2675.36	0.344676	0.043858	7.85892	3.87469e-15	3.55793e-14
ENSMUSG00000028849	Map7d1	245877	8680.57	0.391144	0.049774	7.8584	3.89065e-15	3.57081e-14
ENSMUSG00000037933	Bicd2	76895	4131.6	0.40274	0.0512584	7.85704	3.93316e-15	3.60803e-14
ENSMUSG00000021951	Eef1akmt1	68043	811.679	0.582902	0.0742717	7.84824	4.2192e-15	3.86851e-14
ENSMUSG00000031889	D230025D16Rik	234678	2115.42	-0.395038	0.0503447	-7.84666	4.27262e-15	3.91554e-14
ENSMUSG00000002058	Unc119	22248	1088.64	0.547437	0.069806	7.84226	4.42493e-15	4.05312e-14
ENSMUSG00000037601	Nme1	18102	559.796	0.874611	0.111529	7.84198	4.43513e-15	4.06044e-14
ENSMUSG00000005233	Spc25	66442	410.715	1.0201	0.130103	7.84071	4.48003e-15	4.09952e-14
ENSMUSG00000021474	Sfxn1	14057	2624.35	0.397673	0.0507518	7.83565	4.66426e-15	4.26387e-14
ENSMUSG00000037366	Pafah2	100163	665.642	0.632182	0.0806798	7.83569	4.66261e-15	4.26387e-14
ENSMUSG00000073725	Lmbrd1	68421	6791.86	-0.309978	0.0395641	-7.83484	4.69423e-15	4.28915e-14
ENSMUSG00000022223	Sdr39u1	654795	493.459	-0.889894	0.113591	-7.83419	4.7187e-15	4.30937e-14
ENSMUSG00000025544	Tm9sf2	68059	16054.1	-0.334722	0.0427395	-7.83167	4.81442e-15	4.39462e-14
ENSMUSG00000068966	Zbtb34	241311	1581.22	-0.689463	0.0880413	-7.83114	4.83472e-15	4.41097e-14
ENSMUSG00000010205	Raver1	71766	2426.83	0.396057	0.0505834	7.82978	4.88744e-15	4.45686e-14
ENSMUSG00000080002	Gm5566	433968	161.818	1.32434	0.169179	7.82803	4.95563e-15	4.51681e-14
[truncated: 30,572 more rows]
