# Supplementary material for: Microglia show differential transcriptomic response to Aβ peptide aggregates ex vivo and in vivo
Source: Life Sci Alliance. 2021 Jun 14;4(7):e202101108. doi: 10.26508/lsa.202101108 (PMC8321667; doi:10.26508/lsa.202101108)
Supplement: Supplementary file 13 [file LSA-2021-01108_TableS13.xlsx]

## Sheet: Sheet1
category	ontology	term	over_represented_pvalue	BHadjust	numDEInCat	numInCat	totalDEG	totalNum	enrichment
GO:0030881	MF	beta-2-microglobulin binding	3.06635e-06	0.00109439	7	11	1562	21152	8.61739
GO:0042030	MF	ATPase inhibitor activity	0.00530815	0.228679	3	6	1562	21152	6.77081
GO:0019864	MF	IgG binding	0.00180748	0.120956	4	8	1562	21152	6.77081
GO:0008430	MF	selenium binding	0.00261125	0.154105	4	9	1562	21152	6.01849
GO:0062061	MF	TAP complex binding	0.00234806	0.142985	4	9	1562	21152	6.01849
GO:0015114	MF	phosphate ion transmembrane transporter activity	0.0159114	0.403778	3	7	1562	21152	5.80355
GO:0050693	MF	LBD domain binding	0.00977469	0.316236	3	7	1562	21152	5.80355
GO:0001846	MF	opsonin binding	0.000484719	0.053426	6	15	1562	21152	5.41665
GO:0001849	MF	complement component C1q complex binding	0.0170052	0.421104	3	8	1562	21152	5.0781
GO:0019763	MF	immunoglobulin receptor activity	0.0204439	0.455171	3	8	1562	21152	5.0781
GO:0042608	MF	T cell receptor binding	0.000658149	0.0637866	6	16	1562	21152	5.0781
GO:0046977	MF	TAP binding	0.00640485	0.253099	4	11	1562	21152	4.92422
GO:0004115	MF	3',5'-cyclic-AMP phosphodiesterase activity	0.00785581	0.283073	4	11	1562	21152	4.92422
GO:0042610	MF	CD8 receptor binding	0.00676046	0.261416	4	11	1562	21152	4.92422
GO:0030169	MF	low-density lipoprotein particle binding	0.00189565	0.123906	6	17	1562	21152	4.77939
GO:0004065	MF	arylsulfatase activity	0.0388185	0.617166	2	6	1562	21152	4.51387
GO:0097677	MF	STAT family protein binding	0.0230905	0.487961	3	9	1562	21152	4.51387
GO:0008140	MF	cAMP response element binding protein binding	0.0244179	0.499954	3	9	1562	21152	4.51387
GO:0031994	MF	insulin-like growth factor I binding	0.0146866	0.386683	4	12	1562	21152	4.51387
GO:0016888	MF	endodeoxyribonuclease activity, producing 5'-phosphomonoesters	0.00203406	0.130302	5	15	1562	21152	4.51387
GO:0015026	MF	coreceptor activity	0.000481267	0.0533068	7	23	1562	21152	4.12136
GO:0008429	MF	phosphatidylethanolamine binding	0.0350237	0.585099	3	10	1562	21152	4.06248
GO:0017162	MF	aryl hydrocarbon receptor binding	0.0328855	0.568841	3	10	1562	21152	4.06248
GO:0043995	MF	histone acetyltransferase activity (H4-K5 specific)	0.0250466	0.507112	3	10	1562	21152	4.06248
GO:0043996	MF	histone acetyltransferase activity (H4-K8 specific)	0.0250466	0.507112	3	10	1562	21152	4.06248
GO:0046972	MF	histone acetyltransferase activity (H4-K16 specific)	0.0250466	0.507112	3	10	1562	21152	4.06248
GO:0050656	MF	3'-phosphoadenosine 5'-phosphosulfate binding	0.0495827	0.677319	2	7	1562	21152	3.86903
GO:0005024	MF	transforming growth factor beta-activated receptor activity	0.0221199	0.476404	4	14	1562	21152	3.86903
GO:0005161	MF	platelet-derived growth factor receptor binding	0.0161896	0.408554	4	14	1562	21152	3.86903
GO:0042605	MF	peptide antigen binding	0.000132934	0.0224738	10	35	1562	21152	3.86903
GO:0031078	MF	histone deacetylase activity (H3-K14 specific)	0.0241839	0.49629	3	11	1562	21152	3.69317
GO:0032041	MF	NAD-dependent histone deacetylase activity (H3-K14 specific)	0.0241839	0.49629	3	11	1562	21152	3.69317
GO:0004016	MF	adenylate cyclase activity	0.0329136	0.568841	3	12	1562	21152	3.3854
GO:0039706	MF	co-receptor binding	0.0315265	0.560865	3	12	1562	21152	3.3854
GO:0008484	MF	sulfuric ester hydrolase activity	0.0377095	0.609999	3	12	1562	21152	3.3854
GO:0017154	MF	semaphorin receptor activity	0.0351496	0.586142	3	12	1562	21152	3.3854
GO:0050700	MF	CARD domain binding	0.0379642	0.612077	3	12	1562	21152	3.3854
GO:1901611	MF	phosphatidylglycerol binding	0.0354753	0.589987	3	12	1562	21152	3.3854
GO:0030228	MF	lipoprotein particle receptor activity	0.0366012	0.600233	4	16	1562	21152	3.3854
GO:0004675	MF	transmembrane receptor protein serine/threonine kinase activity	0.0332763	0.570156	4	16	1562	21152	3.3854
GO:0042813	MF	Wnt-activated receptor activity	0.0158422	0.402954	4	16	1562	21152	3.3854
GO:0001222	MF	transcription corepressor binding	0.0128776	0.365137	5	20	1562	21152	3.3854
GO:0016493	MF	C-C chemokine receptor activity	0.00478407	0.21439	6	24	1562	21152	3.3854
GO:0071814	MF	protein-lipid complex binding	0.00360163	0.181169	7	28	1562	21152	3.3854
GO:0071813	MF	lipoprotein particle binding	0.00360163	0.181169	7	28	1562	21152	3.3854
GO:0001637	MF	G protein-coupled chemoattractant receptor activity	0.0063842	0.252727	6	25	1562	21152	3.24999
GO:0004950	MF	chemokine receptor activity	0.0063842	0.252727	6	25	1562	21152	3.24999
GO:0019957	MF	C-C chemokine binding	0.00571546	0.237546	6	25	1562	21152	3.24999
GO:0001221	MF	transcription cofactor binding	0.000211905	0.0301562	12	50	1562	21152	3.24999
GO:0043422	MF	protein kinase B binding	0.0375349	0.608927	4	17	1562	21152	3.18626
GO:0001848	MF	complement binding	0.0158338	0.402954	5	22	1562	21152	3.07764
GO:0019865	MF	immunoglobulin binding	0.0196192	0.448311	5	22	1562	21152	3.07764
GO:0005520	MF	insulin-like growth factor binding	0.026305	0.518377	5	22	1562	21152	3.07764
GO:0004364	MF	glutathione transferase activity	0.00481751	0.214757	7	31	1562	21152	3.05778
GO:0098531	MF	ligand-activated transcription factor activity	0.00109451	0.0867953	9	40	1562	21152	3.04686
GO:0004879	MF	nuclear receptor activity	0.00109451	0.0867953	9	40	1562	21152	3.04686
GO:0004114	MF	3',5'-cyclic-nucleotide phosphodiesterase activity	0.0146593	0.386417	6	27	1562	21152	3.00925
GO:0019956	MF	chemokine binding	0.00609716	0.246871	7	32	1562	21152	2.96223
GO:0004112	MF	cyclic-nucleotide phosphodiesterase activity	0.0176774	0.430321	6	28	1562	21152	2.90177
GO:0032934	MF	sterol binding	0.000885487	0.0771285	11	52	1562	21152	2.86457
GO:0005112	MF	Notch binding	0.0294668	0.546216	5	24	1562	21152	2.82117
GO:0043274	MF	phospholipase binding	0.0474739	0.663013	4	20	1562	21152	2.70832
GO:0046625	MF	sphingolipid binding	0.0386981	0.617166	5	25	1562	21152	2.70832
GO:0003707	MF	steroid hormone receptor activity	0.00129193	0.097105	11	55	1562	21152	2.70832
GO:0015248	MF	sterol transporter activity	0.0191414	0.440979	6	31	1562	21152	2.62096
GO:0001786	MF	phosphatidylserine binding	0.00159641	0.111311	12	62	1562	21152	2.62096
GO:0030544	MF	Hsp70 protein binding	0.0107577	0.332263	9	48	1562	21152	2.53905
GO:0005089	MF	Rho guanyl-nucleotide exchange factor activity	0.000584436	0.05874	13	70	1562	21152	2.51487
GO:0004407	MF	histone deacetylase activity	0.0271914	0.523907	5	28	1562	21152	2.41815
GO:0140375	MF	immune receptor activity	0.000147774	0.0240775	20	113	1562	21152	2.39675
GO:0070491	MF	repressing transcription factor binding	0.00367795	0.182962	12	68	1562	21152	2.3897
GO:0003823	MF	antigen binding	0.00656314	0.257543	10	57	1562	21152	2.37572
GO:0004520	MF	endodeoxyribonuclease activity	0.0164815	0.413139	7	40	1562	21152	2.36978
GO:0015485	MF	cholesterol binding	0.0132877	0.370551	8	46	1562	21152	2.35506
GO:0033558	MF	protein deacetylase activity	0.0320757	0.562137	5	29	1562	21152	2.33476
GO:0001540	MF	amyloid-beta binding	0.00464425	0.211002	10	58	1562	21152	2.33476
GO:0001965	MF	G-protein alpha-subunit binding	0.0274705	0.525233	6	35	1562	21152	2.32142
GO:0001103	MF	RNA polymerase II repressing transcription factor binding	0.042469	0.641279	6	35	1562	21152	2.32142
GO:0019213	MF	deacetylase activity	0.0165551	0.413686	7	41	1562	21152	2.31198
GO:0072341	MF	modified amino acid binding	0.000814568	0.0738531	17	100	1562	21152	2.30207
GO:0017147	MF	Wnt-protein binding	0.0312164	0.558203	6	36	1562	21152	2.25694
GO:0004896	MF	cytokine receptor activity	0.00109307	0.0867953	16	96	1562	21152	2.25694
GO:0001217	MF	DNA-binding transcription repressor activity	6.22473e-07	0.00026916	39	238	1562	21152	2.219
GO:0001227	MF	DNA-binding transcription repressor activity, RNA polymerase II-specific	6.22473e-07	0.00026916	39	238	1562	21152	2.219
GO:0016893	MF	endonuclease activity, active with either ribo- or deoxyribonucleic acids and producing 5'-phosphomonoesters	0.0425533	0.641279	6	37	1562	21152	2.19594
GO:0004712	MF	protein serine/threonine/tyrosine kinase activity	0.0460325	0.653716	6	38	1562	21152	2.13815
GO:0030276	MF	clathrin binding	0.0148229	0.387037	8	52	1562	21152	2.08333
GO:0042826	MF	histone deacetylase binding	0.00134057	0.099179	18	121	1562	21152	2.01445
GO:0019838	MF	growth factor binding	0.00221574	0.137248	20	139	1562	21152	1.94843
GO:0005088	MF	Ras guanyl-nucleotide exchange factor activity	0.00134973	0.099179	18	127	1562	21152	1.91928
GO:0005496	MF	steroid binding	0.00557715	0.23448	15	106	1562	21152	1.91627
GO:1901981	MF	phosphatidylinositol phosphate binding	0.000861695	0.0759813	23	163	1562	21152	1.91078
GO:0031490	MF	chromatin DNA binding	0.0270084	0.521722	11	80	1562	21152	1.86197
GO:0005096	MF	GTPase activator activity	0.000257043	0.0350279	32	237	1562	21152	1.8284
GO:0005319	MF	lipid transporter activity	0.00443141	0.205444	18	134	1562	21152	1.81902
GO:0019199	MF	transmembrane receptor protein kinase activity	0.0363711	0.600233	10	75	1562	21152	1.80555
GO:0019955	MF	cytokine binding	0.00976109	0.316236	17	128	1562	21152	1.7985
GO:0005178	MF	integrin binding	0.0231333	0.488053	16	122	1562	21152	1.77595
GO:0030695	MF	GTPase regulator activity	0.000493051	0.053438	33	255	1562	21152	1.75244
GO:0004519	MF	endonuclease activity	0.0124993	0.357557	15	117	1562	21152	1.7361
GO:0008013	MF	beta-catenin binding	0.0405731	0.632148	11	86	1562	21152	1.73207
GO:0035091	MF	phosphatidylinositol binding	0.00122235	0.0941252	31	246	1562	21152	1.70646
GO:0060589	MF	nucleoside-triphosphatase regulator activity	0.000381036	0.0460624	37	294	1562	21152	1.70422
GO:0004553	MF	hydrolase activity, hydrolyzing O-glycosyl compounds	0.0364445	0.600233	12	97	1562	21152	1.67525
GO:0016798	MF	hydrolase activity, acting on glycosyl bonds	0.0256595	0.510803	15	122	1562	21152	1.66495
GO:0051087	MF	chaperone binding	0.0408176	0.632148	12	99	1562	21152	1.64141
GO:0005543	MF	phospholipid binding	0.000135517	0.0225712	50	414	1562	21152	1.63546
GO:1902936	MF	phosphatidylinositol bisphosphate binding	0.0308584	0.554637	13	109	1562	21152	1.61505
GO:0033218	MF	amide binding	0.000498178	0.053438	42	353	1562	21152	1.61118
GO:0008201	MF	heparin binding	0.0267266	0.520042	17	148	1562	21152	1.55546
GO:0005539	MF	glycosaminoglycan binding	0.011499	0.342826	23	201	1562	21152	1.54954
GO:0042277	MF	peptide binding	0.0026771	0.15529	33	289	1562	21152	1.54627
GO:0003700	MF	DNA-binding transcription factor activity	3.84144e-08	2.33446e-05	112	988	1562	21152	1.53508
GO:0005085	MF	guanyl-nucleotide exchange factor activity	0.011102	0.339631	22	196	1562	21152	1.51998
GO:1901681	MF	sulfur compound binding	0.0105149	0.328372	27	241	1562	21152	1.51711
GO:0000978	MF	RNA polymerase II cis-regulatory region sequence-specific DNA binding	0.000163782	0.0253959	62	567	1562	21152	1.48074
GO:0017137	MF	Rab GTPase binding	0.0271203	0.523433	18	165	1562	21152	1.47727
GO:0000981	MF	DNA-binding transcription factor activity, RNA polymerase II-specific	2.38861e-05	0.00631857	82	761	1562	21152	1.45915
GO:0004518	MF	nuclease activity	0.0296407	0.546373	20	186	1562	21152	1.45609
GO:0008289	MF	lipid binding	7.13671e-05	0.0140762	79	736	1562	21152	1.45352
GO:0000987	MF	cis-regulatory region sequence-specific DNA binding	0.000315545	0.0410118	62	582	1562	21152	1.44258
GO:0000977	MF	RNA polymerase II transcription regulatory region sequence-specific DNA binding	7.02288e-05	0.0139743	83	796	1562	21152	1.412
GO:0000976	MF	transcription regulatory region sequence-specific DNA binding	6.84791e-05	0.0139696	87	842	1562	21152	1.39919
GO:0001067	MF	regulatory region nucleic acid binding	8.44088e-05	0.015949	87	846	1562	21152	1.39258
GO:0140110	MF	transcription regulator activity	5.00197e-07	0.000224939	137	1335	1562	21152	1.38966
GO:0008134	MF	transcription factor binding	0.000684475	0.0660533	72	704	1562	21152	1.38494
GO:0008047	MF	enzyme activator activity	0.00703624	0.266796	45	446	1562	21152	1.36631
GO:0046982	MF	protein heterodimerization activity	0.00187778	0.123096	56	556	1562	21152	1.3639
GO:1990837	MF	sequence-specific double-stranded DNA binding	0.000144923	0.0237853	89	884	1562	21152	1.36335
GO:0043565	MF	sequence-specific DNA binding	0.000131352	0.0224738	108	1112	1562	21152	1.31519
GO:0003677	MF	DNA binding	2.30858e-07	0.000115352	189	1946	1562	21152	1.31519
GO:0003690	MF	double-stranded DNA binding	0.00050263	0.053438	93	964	1562	21152	1.3064
GO:0017016	MF	Ras GTPase binding	0.036851	0.600504	38	409	1562	21152	1.25815
GO:0003779	MF	actin binding	0.0395511	0.624513	39	421	1562	21152	1.25445
GO:0051020	MF	GTPase binding	0.0260012	0.515099	47	517	1562	21152	1.23106
GO:0044877	MF	protein-containing complex binding	0.00395268	0.191957	112	1232	1562	21152	1.23106
GO:0008092	MF	cytoskeletal protein binding	0.0187126	0.436784	84	959	1562	21152	1.18613
GO:0046983	MF	protein dimerization activity	0.00690599	0.26415	119	1386	1562	21152	1.16266
GO:0042803	MF	protein homodimerization activity	0.0339705	0.57587	80	936	1562	21152	1.1574
GO:0005102	MF	signaling receptor binding	0.00438185	0.20503	135	1594	1562	21152	1.14687
GO:0043168	MF	anion binding	0.00166526	0.114506	221	2640	1562	21152	1.1336
GO:0043169	MF	cation binding	0.000219336	0.0308235	296	3538	1562	21152	1.13293
GO:0046872	MF	metal ion binding	0.000387853	0.0463877	287	3441	1562	21152	1.12945
GO:0043167	MF	ion binding	2.32511e-06	0.000871336	448	5374	1562	21152	1.12889
GO:0003676	MF	nucleic acid binding	0.00357179	0.180882	240	2968	1562	21152	1.09501
GO:0042802	MF	identical protein binding	0.0316807	0.560865	150	1869	1562	21152	1.08681
GO:0097159	MF	organic cyclic compound binding	0.00139498	0.101838	390	4960	1562	21152	1.06476
GO:1901363	MF	heterocyclic compound binding	0.00315993	0.171069	379	4860	1562	21152	1.05602
GO:0005515	MF	protein binding	5.87324e-06	0.00197104	677	8689	1562	21152	1.05509
GO:0005488	MF	binding	5.78275e-08	3.25063e-05	958	12816	1562	21152	1.01224
