# Supplementary material for: Microglia show differential transcriptomic response to Aβ peptide aggregates ex vivo and in vivo
Source: Life Sci Alliance. 2021 Jun 14;4(7):e202101108. doi: 10.26508/lsa.202101108 (PMC8321667; doi:10.26508/lsa.202101108)
Supplement: Supplementary file 14 [file LSA-2021-01108_TableS14.xlsx]

## Sheet: Sheet1
category	pathway_name	over_represented_pvalue	BHadjust	numDEInCat	numInCat	totalDEG	totalNum	enrichment
3030	DNA replication	1.96714e-13	2.21303e-11	22	35	1908	6309	2.07844
3430	Mismatch repair	0.0002858	0.00791946	9	22	1908	6309	1.3527
670	One carbon pool by folate	0.00523406	0.0471065	7	19	1908	6309	1.21822
4110	Cell cycle	1.37531e-13	2.21303e-11	45	124	1908	6309	1.19998
30	Pentose phosphate pathway	0.000779415	0.011785	10	28	1908	6309	1.18093
3440	Homologous recombination	0.00248344	0.0286549	9	27	1908	6309	1.1022
3050	Proteasome	0.000557785	0.00965397	14	44	1908	6309	1.0521
4621	NOD-like receptor signaling pathway	0.000125789	0.00404321	17	56	1908	6309	1.00379
