# Supplementary material for: Microglia show differential transcriptomic response to Aβ peptide aggregates ex vivo and in vivo
Source: Life Sci Alliance. 2021 Jun 14;4(7):e202101108. doi: 10.26508/lsa.202101108 (PMC8321667; doi:10.26508/lsa.202101108)
Supplement: Supplementary file 16 [file LSA-2021-01108_TableS16.xlsx]

## Sheet: 1_DEGs_fib_12h_vs_oligos_12h
GeneStableID	symbol	entrezid	baseMean	log2FoldChange	lfcSE	stat	pvalue	padj
ENSMUSG00000004730	Adgre1	13733	96550.3	1.62839	0.0401773	40.5302	0	0
ENSMUSG00000020017	Hal	15109	3622.59	-2.48013	0.0532235	-46.5985	0	0
ENSMUSG00000020914	Top2a	21973	1651.96	-2.56214	0.0634969	-40.3506	0	0
ENSMUSG00000028832	Stmn1	16765	2854.76	-2.13012	0.0560988	-37.9709	0	0
ENSMUSG00000025701	Alox5	11689	2064.7	-2.60291	0.0710554	-36.6321	8.83563e-294	3.26318e-290
ENSMUSG00000018819	Lsp1	16985	1242.39	-2.65223	0.0734106	-36.1287	8.04333e-286	2.47547e-282
ENSMUSG00000024053	Emilin2	246707	7463.76	-1.36077	0.0392868	-34.6369	7.0373e-263	1.85644e-259
ENSMUSG00000018924	Alox15	11687	2424.71	-1.98475	0.0594142	-33.4053	1.14982e-244	2.65406e-241
ENSMUSG00000029752	Asns	27053	2239.07	1.70663	0.0520015	32.8188	3.17261e-236	6.50949e-233
ENSMUSG00000025473	Adam8	11501	43181	-1.01316	0.031157	-32.5179	5.94995e-232	1.09872e-228
ENSMUSG00000032193	Ldlr	16835	3389.58	1.76337	0.054594	32.2996	7.08253e-229	1.18896e-225
ENSMUSG00000023015	Racgap1	26934	1444.17	-2.06723	0.0642409	-32.1793	3.44353e-227	5.29902e-224
ENSMUSG00000032231	Anxa2	12306	12543.5	-0.910035	0.0283548	-32.0946	5.24012e-226	7.44338e-223
ENSMUSG00000018459	Slc13a3	114644	809.783	4.39238	0.138255	31.7701	1.67795e-221	2.21321e-218
ENSMUSG00000020649	Rrm2	20135	771.511	-3.33704	0.108625	-30.7207	3.01617e-207	3.7131e-204
ENSMUSG00000029730	Mcm7	17220	1534.07	-1.86327	0.0613364	-30.3778	1.0783e-202	1.24449e-199
ENSMUSG00000075010	AW112010	107350	1373.6	2.98279	0.0990238	30.1219	2.50084e-199	2.7165e-196
ENSMUSG00000023367	Tmem176a	66058	9399.71	1.23799	0.041366	29.9278	8.548e-197	8.30776e-194
ENSMUSG00000040204	Pclaf	68026	643.037	-2.8897	0.09655	-29.9295	8.1232e-197	8.30776e-194
ENSMUSG00000039899	Fgl2	14190	2407.94	2.78586	0.0937419	29.7184	4.44787e-194	4.10672e-191
ENSMUSG00000061232	H2-K1	14972	47638.3	1.1675	0.0415027	28.1308	4.1194e-174	3.62233e-171
ENSMUSG00000023030	Slc11a2	18174	8825.99	0.882059	0.0315103	27.9928	1.99042e-172	1.67068e-169
ENSMUSG00000046341	Gm11223	100039888	1059.84	-2.27427	0.0812986	-27.9743	3.33992e-172	2.68152e-169
ENSMUSG00000017716	Birc5	11799	582.218	-2.69327	0.0972253	-27.7014	6.72396e-169	5.17353e-166
ENSMUSG00000040084	Bub1b	12236	748.556	-2.3695	0.0878764	-26.9641	3.90277e-160	2.88274e-157
ENSMUSG00000018899	Irf1	16362	6042.53	2.03528	0.0760343	26.7679	7.65172e-158	5.43449e-155
ENSMUSG00000042406	Atf4	11911	7035.83	1.20294	0.0452566	26.5804	1.14413e-155	7.82501e-153
ENSMUSG00000024308	Tapbp	21356	22145.4	1.41423	0.0535372	26.4159	8.99746e-154	5.93382e-151
ENSMUSG00000016496	Cd274	60533	3450.5	2.80082	0.106171	26.3802	2.31172e-153	1.47201e-150
ENSMUSG00000030978	Rrm1	20133	2820.46	-1.34327	0.0512557	-26.2072	2.198e-151	1.35294e-148
ENSMUSG00000001020	S100a4	20198	349.423	-3.71648	0.141882	-26.1942	3.0926e-151	1.84219e-148
ENSMUSG00000021876	Rnase4	58809	4317.95	-1.47645	0.0563833	-26.1859	3.84529e-151	2.21897e-148
ENSMUSG00000027715	Ccna2	12428	883.551	-2.92433	0.112018	-26.1058	3.13179e-150	1.75247e-147
ENSMUSG00000060063	Alox5ap	11690	5460.13	-1.20754	0.0463186	-26.0704	7.90283e-150	4.29217e-147
ENSMUSG00000004609	Cd33	12489	4206.53	-1.34824	0.0517505	-26.0527	1.25517e-149	6.62228e-147
ENSMUSG00000027469	Tpx2	72119	810.646	-2.08632	0.0805819	-25.8907	8.48266e-148	4.35113e-145
ENSMUSG00000019987	Arg1	11846	9353.71	-2.85386	0.112603	-25.3445	1.03402e-141	5.1606e-139
ENSMUSG00000028859	Csf3r	12986	8455.42	0.881794	0.035085	25.1331	2.16364e-139	1.05141e-136
ENSMUSG00000021069	Pygl	110095	4656.81	-0.970622	0.0386262	-25.1286	2.42506e-139	1.14823e-136
ENSMUSG00000005410	Mcm5	17218	1966.01	-2.07928	0.0829783	-25.0582	1.42256e-138	6.56726e-136
ENSMUSG00000051906	Cd209f	69142	301.055	6.1083	0.244562	24.9765	1.09968e-137	4.95287e-135
ENSMUSG00000036636	Clcn7	26373	14871.2	1.01482	0.0406578	24.9601	1.65941e-137	7.29587e-135
ENSMUSG00000096255	Dynlt1b	21648	10537.7	-0.763328	0.0306055	-24.9409	2.67956e-137	1.15071e-134
ENSMUSG00000029810	Tmem176b	65963	23367.8	1.0171	0.0408018	24.9277	3.72392e-137	1.56286e-134
ENSMUSG00000031146	Plp2	18824	1768.52	-1.36574	0.054853	-24.8982	7.77941e-137	3.19233e-134
ENSMUSG00000020077	Srgn	19073	5597.82	-1.19421	0.0480085	-24.8751	1.38451e-136	5.55789e-134
ENSMUSG00000079197	Psme2	19188	8834.44	1.39582	0.0561395	24.8634	1.85116e-136	7.27308e-134
ENSMUSG00000037443	Cep85	70012	3341.35	1.32957	0.0536311	24.791	1.12192e-135	4.31611e-133
ENSMUSG00000025804	Ccr1	12768	9750.41	-1.21721	0.0492012	-24.7394	4.03461e-135	1.52047e-132
ENSMUSG00000041439	Mfsd6	98682	2375.06	-1.90058	0.0768393	-24.7345	4.54894e-135	1.68001e-132
ENSMUSG00000069792	Wfdc17	100034251	20110.3	1.24899	0.0507228	24.6238	7.02124e-134	2.54224e-131
ENSMUSG00000026728	Vim	22352	13348.1	-0.984067	0.0400385	-24.578	2.17063e-133	7.70825e-131
ENSMUSG00000073412	Lst1	16988	821.916	2.02425	0.0825688	24.5159	9.99327e-133	3.48181e-130
ENSMUSG00000027306	Nusap1	108907	534.331	-2.57363	0.105816	-24.3218	1.15228e-130	3.94039e-128
ENSMUSG00000002103	Acp2	11432	10869.3	0.841422	0.034773	24.1975	2.36127e-129	7.92784e-127
ENSMUSG00000025017	Pik3ap1	83490	15919.8	1.24367	0.0518494	23.9862	3.8756e-127	1.27798e-124
ENSMUSG00000066152	Slc31a2	20530	9928.52	1.37066	0.0572538	23.9401	1.17114e-126	3.7941e-124
ENSMUSG00000042129	Rassf4	213391	34155.1	0.948408	0.0398316	23.8105	2.60274e-125	8.28657e-123
ENSMUSG00000024672	Ms4a7	109225	35812	0.822835	0.0347972	23.6466	1.27891e-123	4.00276e-121
ENSMUSG00000040026	Saa3	20210	59223.5	1.84367	0.0780976	23.6073	3.24505e-123	9.98719e-121
ENSMUSG00000028599	Tnfrsf1b	21938	28034.2	0.777295	0.0329305	23.6042	3.49362e-123	1.05759e-120
ENSMUSG00000015852	Fcrls	80891	40128.8	0.763084	0.0324949	23.4832	6.06007e-122	1.80492e-119
ENSMUSG00000000579	Dynlt1c	100040563	10235.2	-0.672147	0.0286382	-23.4703	8.21045e-122	2.40658e-119
ENSMUSG00000006398	Cdc20	107995	543.57	-2.1686	0.092559	-23.4293	2.1474e-121	6.19593e-119
ENSMUSG00000005667	Mthfd2	17768	3433.39	1.47177	0.0628789	23.4063	3.68347e-121	1.04644e-118
ENSMUSG00000000732	Icosl	50723	2848.82	1.9806	0.0847163	23.3792	6.96528e-121	1.9488e-118
ENSMUSG00000055148	Klf2	16598	709.998	-2.24827	0.0967935	-23.2275	2.40023e-119	6.61533e-117
ENSMUSG00000023913	Pla2g7	27226	16708.6	1.0205	0.0440676	23.1575	1.22144e-118	3.31693e-116
ENSMUSG00000020901	Pik3r5	320207	10824.9	0.840656	0.0363558	23.123	2.71523e-118	7.26658e-116
ENSMUSG00000009185	Ccl8	20307	620.863	2.58581	0.111845	23.1196	2.93958e-118	7.75461e-116
ENSMUSG00000049037	Clec4a1	269799	1566.67	1.71573	0.0742799	23.0982	4.82721e-118	1.25548e-115
ENSMUSG00000094248	Hist1h2ao	665433	1093.95	-2.55366	0.110603	-23.0886	6.02882e-118	1.54623e-115
ENSMUSG00000038943	Prc1	233406	817.218	-2.47554	0.107366	-23.0569	1.25424e-117	3.17271e-115
ENSMUSG00000094777	Hist1h2ap	319171	1093.89	-2.54523	0.110565	-23.0202	2.92806e-117	7.30669e-115
ENSMUSG00000002870	Mcm2	17216	2226.94	-1.28046	0.0556973	-22.9896	5.92297e-117	1.45831e-114
ENSMUSG00000041431	Ccnb1	268697	888.758	-2.40124	0.105272	-22.8099	3.65584e-115	8.76736e-113
ENSMUSG00000028270	Gbp2	14469	2711.67	3.89938	0.171266	22.768	9.52914e-115	2.25596e-112
ENSMUSG00000033450	Tagap	72536	2485.45	1.55806	0.0690625	22.5601	1.06864e-112	2.49792e-110
ENSMUSG00000040229	Gpr34	23890	2667.2	-2.53038	0.112379	-22.5166	2.85531e-112	6.59076e-110
ENSMUSG00000030867	Plk1	18817	463.626	-2.68176	0.121444	-22.0823	4.67326e-108	1.06539e-105
ENSMUSG00000031004	Mki67	17345	2141.56	-2.06637	0.0941007	-21.9591	7.08483e-107	1.59547e-104
ENSMUSG00000022122	Ednrb	13618	23724.7	1.19849	0.0548191	21.8626	5.90435e-106	1.31361e-103
ENSMUSG00000025574	Tk1	21877	501.535	-2.4392	0.112069	-21.7651	4.96894e-105	1.09234e-102
ENSMUSG00000024397	Aif1	11629	5617.03	1.11785	0.0514798	21.7143	1.50397e-104	3.26733e-102
ENSMUSG00000047250	Ptgs1	19224	15946.7	-0.683776	0.0315872	-21.6472	6.45499e-104	1.38602e-101
ENSMUSG00000029414	Kntc1	208628	367.679	-2.82661	0.131085	-21.5631	3.98746e-103	8.46349e-101
ENSMUSG00000047735	Samd9l	209086	2590.48	2.29491	0.106645	21.5191	1.03167e-102	2.16487e-100
ENSMUSG00000035356	Nfkbiz	80859	8349.15	1.4041	0.065481	21.4428	5.32776e-102	1.10542e-99
ENSMUSG00000079363	Gbp4	17472	327.394	5.33417	0.249847	21.3497	3.9204e-101	8.04378e-99
ENSMUSG00000029470	P2rx4	18438	28428	0.623709	0.0293763	21.2317	4.86695e-100	9.76882e-98
ENSMUSG00000073409	H2-Q6	110557	1190.67	1.74365	0.0821232	21.2322	4.82017e-100	9.76882e-98
ENSMUSG00000032218	Ccnb2	12442	610.314	-2.36368	0.111425	-21.2131	7.22285e-100	1.43416e-97
ENSMUSG00000002897	Il17ra	16172	2793.04	-1.29754	0.061337	-21.1543	2.51982e-99	4.95011e-97
ENSMUSG00000001517	Foxm1	14235	532.863	-2.58424	0.122292	-21.1317	4.06781e-99	7.90697e-97
ENSMUSG00000096210	H1f0	14958	5281.73	0.871173	0.0413372	21.0748	1.3553e-98	2.60698e-96
ENSMUSG00000027699	Ect2	13605	566.332	-2.29712	0.109373	-21.0027	6.19459e-98	1.17927e-95
ENSMUSG00000092074	Dynlt1a	100310872	6110.26	-0.727152	0.0348399	-20.8712	9.77527e-97	1.84194e-94
ENSMUSG00000019942	Cdk1	12534	1189.31	-1.62456	0.0778673	-20.8632	1.1573e-96	2.15865e-94
ENSMUSG00000036908	Unc93b1	54445	44086.5	0.690259	0.0330963	20.8561	1.34286e-96	2.47972e-94
ENSMUSG00000040907	Atp1a3	232975	7094.14	-1.03639	0.049742	-20.8352	2.07563e-96	3.7949e-94
ENSMUSG00000027379	Bub1	12235	522.506	-2.29708	0.110273	-20.8309	2.2709e-96	4.11122e-94
ENSMUSG00000037474	Dtl	76843	381.601	-2.53705	0.122243	-20.7541	1.12498e-95	2.01689e-93
ENSMUSG00000049502	Dtx3l	209200	4915.35	1.89785	0.0914904	20.7437	1.39607e-95	2.47882e-93
ENSMUSG00000025408	Ddit3	13198	1210.88	2.03485	0.0983563	20.6886	4.3903e-95	7.72107e-93
ENSMUSG00000021281	Tnfaip2	21928	25168.2	1.33504	0.0645842	20.6713	6.27684e-95	1.09347e-92
ENSMUSG00000004698	Hdac9	79221	1805.83	-1.28246	0.0621339	-20.6403	1.19412e-94	2.0608e-92
ENSMUSG00000018920	Cxcl16	66102	13421.8	0.630411	0.0306065	20.5973	2.90254e-94	4.9628e-92
ENSMUSG00000048327	Ckap2l	70466	451.867	-1.99432	0.0968533	-20.5911	3.29552e-94	5.58303e-92
ENSMUSG00000040264	Gbp2b	14468	1126.15	4.236	0.20576	20.5871	3.58472e-94	6.01776e-92
ENSMUSG00000095677	Dynlt1f	100040531	7849.75	-0.653242	0.0317568	-20.5702	5.07911e-94	8.44963e-92
ENSMUSG00000040552	C3ar1	12267	75812.2	0.780874	0.0380572	20.5185	1.47323e-93	2.42899e-91
ENSMUSG00000012443	Kif11	16551	540.026	-3.07562	0.150182	-20.4794	3.28895e-93	5.37467e-91
ENSMUSG00000042726	Trafd1	231712	6708.28	1.35428	0.0661622	20.469	4.06532e-93	6.58511e-91
ENSMUSG00000057762	Gm6169	620648	1157.88	-1.35682	0.0663514	-20.449	6.12682e-93	9.83808e-91
ENSMUSG00000054717	Hmgb2	97165	2441.31	-1.26415	0.0620927	-20.359	3.86288e-92	6.14931e-90
ENSMUSG00000050721	Plekho2	102595	15999.2	0.619774	0.030457	20.3491	4.7261e-92	7.45916e-90
ENSMUSG00000029581	Fscn1	14086	972.617	2.53368	0.124548	20.343	5.35237e-92	8.37601e-90
ENSMUSG00000016283	H2-M2	14990	403.146	2.51462	0.12412	20.2597	2.91967e-91	4.53063e-89
ENSMUSG00000037313	Tacc3	21335	1724.83	-1.82786	0.090393	-20.2212	6.36825e-91	9.79967e-89
ENSMUSG00000033880	Lgals3bp	19039	20958.5	1.56257	0.0772904	20.2169	6.95211e-91	1.06097e-88
ENSMUSG00000002885	Adgre5	26364	1021.73	-2.01384	0.0996415	-20.2109	7.85582e-91	1.18906e-88
ENSMUSG00000025877	Hk3	212032	15207.2	0.607746	0.0302184	20.1118	5.81943e-90	8.73671e-88
ENSMUSG00000029177	Cenpa	12615	1090.78	-2.14352	0.106751	-20.0797	1.11157e-89	1.65534e-87
ENSMUSG00000044827	Tlr1	21897	2066.17	1.32573	0.0660811	20.0622	1.57807e-89	2.33126e-87
ENSMUSG00000020023	Tmcc3	319880	4138.5	1.62792	0.081419	19.9943	6.17441e-89	9.04894e-87
ENSMUSG00000001403	Ube2c	68612	452.131	-2.24465	0.112275	-19.9924	6.40811e-89	9.31749e-87
ENSMUSG00000032715	Trib3	228775	627.434	2.1496	0.107808	19.9393	1.85784e-88	2.68022e-86
ENSMUSG00000041859	Mcm3	17215	2678.31	-1.13121	0.0568236	-19.9074	3.51394e-88	5.03011e-86
ENSMUSG00000025792	Slc25a10	27376	4122.26	0.97696	0.0492188	19.8493	1.11671e-87	1.58625e-85
ENSMUSG00000005470	Asf1b	66929	788.56	-1.58262	0.080344	-19.698	2.24307e-86	3.13791e-84
ENSMUSG00000034641	Cd300ld	217305	3132.13	-1.07766	0.0552696	-19.4982	1.13606e-84	1.57734e-82
ENSMUSG00000030966	Trim21	20821	1721.12	1.46684	0.0752634	19.4894	1.3505e-84	1.86107e-82
ENSMUSG00000056116	H2-T22	15039	1753.53	1.90946	0.0981201	19.4605	2.37552e-84	3.24937e-82
ENSMUSG00000059751	Rps3a3	668144	2195.72	-1.33749	0.0688883	-19.4153	5.72875e-84	7.77847e-82
ENSMUSG00000035455	Fignl1	60530	663.895	-1.92396	0.0993077	-19.3737	1.28553e-83	1.73274e-81
ENSMUSG00000027111	Itga6	16403	9351.4	-0.811344	0.0419466	-19.3423	2.36688e-83	3.16716e-81
ENSMUSG00000020897	Aurkb	20877	520.728	-2.29758	0.11909	-19.2929	6.16695e-83	8.19272e-81
ENSMUSG00000020788	Atp2a3	53313	500.465	-2.82287	0.147205	-19.1764	5.83031e-82	7.69018e-80
ENSMUSG00000001228	Uhrf1	18140	1057.42	-1.96399	0.102655	-19.132	1.36799e-81	1.79158e-79
ENSMUSG00000034854	Mfsd12	73822	12342.9	0.710103	0.037224	19.0765	3.9608e-81	5.15071e-79
ENSMUSG00000006418	Rnf114	81018	6181.09	1.15917	0.0608653	19.0448	7.25568e-81	9.36946e-79
ENSMUSG00000053318	Slamf8	74748	1066.31	2.07671	0.109342	18.9928	1.95706e-80	2.50966e-78
ENSMUSG00000021365	Nedd9	18003	805.737	-1.68836	0.0890435	-18.9611	3.57873e-80	4.55758e-78
ENSMUSG00000046718	Bst2	69550	9620.75	1.46366	0.0776859	18.8407	3.49979e-79	4.42651e-77
ENSMUSG00000074272	Ceacam1	26365	625.033	-1.84636	0.0982598	-18.7906	9.0214e-79	1.13326e-76
ENSMUSG00000060550	H2-Q7	15018	979.004	1.7384	0.0927867	18.7355	2.54289e-78	3.17277e-76
ENSMUSG00000028551	Cdkn2c	12580	594.531	-1.76128	0.0942332	-18.6907	5.89371e-78	7.30424e-76
ENSMUSG00000026535	Ifi202b	26388	2954.34	1.90216	0.101846	18.6768	7.65251e-78	9.42075e-76
ENSMUSG00000015312	Gadd45b	17873	747.544	2.28209	0.122486	18.6315	1.78385e-77	2.1815e-75
ENSMUSG00000026355	Mcm6	17219	6293.4	-1.00756	0.0540846	-18.6294	1.85611e-77	2.25493e-75
ENSMUSG00000037926	Ssh2	237860	9923.84	-0.958241	0.0516032	-18.5694	5.68241e-77	6.85826e-75
ENSMUSG00000024056	Ndc80	67052	323.133	-2.22798	0.120049	-18.5589	6.91129e-77	8.28727e-75
ENSMUSG00000036777	Anln	68743	618.389	-2.63651	0.142689	-18.4773	3.14571e-76	3.74766e-74
ENSMUSG00000027078	Ube2l6	56791	3661.14	1.83127	0.0992188	18.4569	4.59326e-76	5.40249e-74
ENSMUSG00000096727	Psmb9	16912	1848.74	1.65179	0.0894945	18.4569	4.5917e-76	5.40249e-74
ENSMUSG00000030990	Pgap2	233575	2877.18	1.06254	0.0576117	18.4431	5.92773e-76	6.92795e-74
ENSMUSG00000022912	Pros1	19128	6787.1	-0.901475	0.0489031	-18.4339	7.02076e-76	8.15379e-74
ENSMUSG00000002325	Irf9	16391	3046.75	1.03181	0.0560172	18.4195	9.17206e-76	1.05857e-73
ENSMUSG00000030786	Itgam	16409	39042.7	-0.805235	0.0437345	-18.4119	1.05417e-75	1.20909e-73
ENSMUSG00000031960	Aars	234734	9772.88	0.980559	0.0533109	18.3932	1.48857e-75	1.69679e-73
ENSMUSG00000032254	Kif23	71819	442.563	-2.7492	0.149501	-18.3892	1.60212e-75	1.81502e-73
ENSMUSG00000017652	Cd40	21939	1226.52	1.94881	0.106019	18.3817	1.84235e-75	2.07444e-73
ENSMUSG00000055546	Timd4	276891	1742.92	-1.47572	0.0805909	-18.3112	6.73493e-75	7.53741e-73
ENSMUSG00000003617	Cp	12870	6420.37	1.35091	0.0737811	18.3097	6.9258e-75	7.70432e-73
ENSMUSG00000030787	Lyve1	114332	543.901	-3.62957	0.19843	-18.2914	9.68452e-75	1.07086e-72
ENSMUSG00000068566	Myadm	50918	10256.7	-0.656595	0.0359625	-18.2578	1.79494e-74	1.97293e-72
ENSMUSG00000001627	Ifrd1	15982	2988.23	0.959293	0.0525735	18.2467	2.19776e-74	2.40141e-72
ENSMUSG00000028233	Tgs1	116940	2815.34	0.865328	0.0475955	18.1809	7.31653e-74	7.94747e-72
ENSMUSG00000001025	S100a6	20200	350.889	-2.17465	0.11968	-18.1705	8.83771e-74	9.54369e-72
ENSMUSG00000024789	Jak2	16452	3292.71	1.01825	0.0560452	18.1684	9.17709e-74	9.85256e-72
ENSMUSG00000022673	Mcm4	17217	1910.88	-1.42895	0.0786816	-18.1612	1.04777e-73	1.11839e-71
ENSMUSG00000028312	Smc2	14211	930.234	-1.53996	0.0849007	-18.1383	1.58805e-73	1.68534e-71
ENSMUSG00000003779	Kif20a	19348	526.969	-2.36139	0.130999	-18.026	1.21798e-72	1.28522e-70
ENSMUSG00000056529	Ptafr	19204	6949.16	1.1257	0.0625913	17.985	2.55618e-72	2.68196e-70
ENSMUSG00000027496	Aurka	20878	395.173	-2.04442	0.113914	-17.947	5.06524e-72	5.28445e-70
ENSMUSG00000056394	Lig1	16881	1265.46	-1.7105	0.095379	-17.9337	6.433e-72	6.67369e-70
ENSMUSG00000027366	Sppl2a	66552	14313.4	0.821221	0.0458817	17.8987	1.20758e-71	1.24576e-69
ENSMUSG00000024359	Hspa9	15526	14528.6	0.684542	0.038315	17.8662	2.1633e-71	2.2193e-69
ENSMUSG00000053560	Ier2	15936	2005.21	-1.25544	0.0703477	-17.8462	3.09278e-71	3.15532e-69
ENSMUSG00000039109	F13a1	74145	47391.9	-0.769236	0.0431289	-17.8358	3.72989e-71	3.7844e-69
ENSMUSG00000058163	Gm5431	432555	3150.08	1.68518	0.0948797	17.7613	1.41028e-70	1.42307e-68
ENSMUSG00000020572	Nampt	59027	6991.38	1.03483	0.0583641	17.7306	2.43585e-70	2.44459e-68
ENSMUSG00000029009	Mthfr	17769	4187.81	1.41327	0.0798053	17.709	3.57463e-70	3.56806e-68
ENSMUSG00000026683	Nuf2	66977	340.334	-2.74151	0.155843	-17.5915	2.8645e-69	2.84386e-67
ENSMUSG00000002108	Nr1h3	22259	566.931	1.8261	0.103811	17.5906	2.90612e-69	2.86975e-67
ENSMUSG00000027323	Rad51	19361	264.683	-2.61566	0.149211	-17.5299	8.46745e-69	8.31702e-67
ENSMUSG00000030761	Myo7a	17921	6365.01	-0.665928	0.0380527	-17.5002	1.42892e-68	1.3961e-66
ENSMUSG00000022351	Sqle	20775	1108.77	1.07358	0.0614265	17.4775	2.12496e-68	2.06524e-66
ENSMUSG00000038179	Slamf7	75345	294.717	2.75186	0.157804	17.4385	4.21006e-68	4.07031e-66
ENSMUSG00000078853	Igtp	16145	2187.92	2.77943	0.159448	17.4316	4.75042e-68	4.56882e-66
ENSMUSG00000050578	Mmp13	17386	911.504	1.9848	0.11411	17.3937	9.20319e-68	8.80549e-66
ENSMUSG00000038252	Ncapd2	68298	821.481	-1.9929	0.114602	-17.3897	9.87121e-68	9.39597e-66
ENSMUSG00000028773	Fabp3	14077	1003.12	1.46012	0.0840799	17.3659	1.49648e-67	1.41712e-65
ENSMUSG00000067212	H2-T23	15040	8095.36	2.08208	0.120085	17.3383	2.416e-67	2.27621e-65
ENSMUSG00000078153	Psme2b	621823	1332.7	1.25399	0.0724904	17.2987	4.81156e-67	4.51016e-65
ENSMUSG00000000957	Mmp14	17387	6836.75	0.947618	0.0548689	17.2706	7.83584e-67	7.30791e-65
ENSMUSG00000036820	Amdhd2	245847	4618.53	0.771615	0.0446963	17.2635	8.85701e-67	8.21877e-65
ENSMUSG00000031897	Psmb10	19171	3540.67	1.25865	0.0731126	17.2152	2.04208e-66	1.88546e-64
ENSMUSG00000028068	Iqgap3	404710	1126.29	-1.43173	0.0832837	-17.191	3.10116e-66	2.84905e-64
ENSMUSG00000004709	Cd244a	18106	519.91	-1.96518	0.114591	-17.1496	6.32768e-66	5.7845e-64
ENSMUSG00000083773	Gm13394	100033452	13484.6	-0.643043	0.0375688	-17.1164	1.11987e-65	1.0187e-63
ENSMUSG00000006360	Crip1	12925	2013.22	-1.25493	0.0733225	-17.1152	1.14378e-65	1.03534e-63
ENSMUSG00000063268	Parp10	671535	2328.39	1.76741	0.103341	17.1026	1.41887e-65	1.27809e-63
ENSMUSG00000035042	Ccl5	20304	692.244	5.26604	0.308115	17.0912	1.7263e-65	1.54747e-63
ENSMUSG00000029163	Emilin1	100952	1781.01	-1.10117	0.0644675	-17.081	2.05679e-65	1.83482e-63
ENSMUSG00000036427	Gpi1	14751	12213.8	-0.62719	0.0367237	-17.0786	2.14144e-65	1.90115e-63
ENSMUSG00000043953	Ccrl2	54199	3840.04	1.66033	0.0972902	17.0658	2.66762e-65	2.35695e-63
ENSMUSG00000038213	Tapbpl	213233	1112.36	1.41623	0.0830108	17.0608	2.90706e-65	2.55627e-63
ENSMUSG00000002307	Daxx	13163	2541.46	1.78147	0.104634	17.0258	5.28514e-65	4.60355e-63
ENSMUSG00000015568	Lpl	16956	88395.9	0.615579	0.0362053	17.0024	7.87617e-65	6.82823e-63
ENSMUSG00000055782	Abcd2	26874	3912.15	-1.17547	0.0692028	-16.9858	1.04575e-64	9.02373e-63
ENSMUSG00000058290	Espl1	105988	524.535	-1.88355	0.111219	-16.9355	2.46395e-64	2.11624e-62
ENSMUSG00000022385	Gtse1	29870	338.311	-2.15356	0.127344	-16.9113	3.71424e-64	3.17533e-62
ENSMUSG00000024679	Ms4a6d	68774	19420	0.869435	0.0514296	16.9053	4.10923e-64	3.49682e-62
ENSMUSG00000022033	Pbk	52033	338.671	-3.67173	0.217372	-16.8915	5.19722e-64	4.40238e-62
ENSMUSG00000031604	Msmo1	66234	3433.37	0.910481	0.0539487	16.8768	6.66642e-64	5.6211e-62
ENSMUSG00000002055	Spag5	54141	287.202	-2.99383	0.177651	-16.8523	1.0095e-63	8.47337e-62
ENSMUSG00000019960	Dusp6	67603	7203.26	-0.818609	0.0485878	-16.848	1.08449e-63	9.06161e-62
ENSMUSG00000030729	Pgm2l1	70974	824.678	-1.29617	0.0769484	-16.8447	1.14709e-63	9.54152e-62
ENSMUSG00000020399	Havcr2	171285	1260.71	-1.69348	0.100637	-16.8276	1.53082e-63	1.26763e-61
ENSMUSG00000060802	B2m	12010	80740.8	0.747809	0.0444706	16.8158	1.86896e-63	1.54072e-61
ENSMUSG00000079419	Ms4a6c	73656	3317.61	1.45061	0.086329	16.8032	2.31041e-63	1.89618e-61
ENSMUSG00000043832	Clec4a3	73149	1602.56	1.11097	0.0662426	16.7712	3.96402e-63	3.23892e-61
ENSMUSG00000037966	Ninj1	18081	21685	0.727985	0.0435028	16.7342	7.38128e-63	6.00453e-61
ENSMUSG00000032596	Uba7	74153	3413.27	1.42279	0.0850887	16.7212	9.1801e-63	7.43507e-61
ENSMUSG00000051378	Kif18b	70218	244.544	-2.90223	0.173713	-16.7071	1.164e-62	9.38621e-61
ENSMUSG00000022360	Atad2	70472	2932.4	-1.24851	0.074737	-16.7053	1.19847e-62	9.62219e-61
ENSMUSG00000066150	Slc31a1	20529	12797.8	0.834291	0.0499825	16.6917	1.50702e-62	1.2047e-60
ENSMUSG00000021596	Mctp1	78771	2052.63	-1.15423	0.069174	-16.6858	1.66146e-62	1.32244e-60
ENSMUSG00000029298	Gbp9	236573	1980.62	2.91621	0.174907	16.6729	2.06464e-62	1.63629e-60
ENSMUSG00000020143	Dock2	94176	8332.3	-0.883966	0.0530554	-16.6612	2.50967e-62	1.9805e-60
ENSMUSG00000038623	Tm6sf1	107769	2273.93	-1.12141	0.0673296	-16.6555	2.76096e-62	2.16953e-60
ENSMUSG00000024164	C3	12266	25207.8	2.03286	0.122097	16.6496	3.04573e-62	2.38315e-60
ENSMUSG00000068747	Sort1	20661	6941.72	-1.07565	0.0646398	-16.6406	3.53944e-62	2.75778e-60
ENSMUSG00000021493	Pdlim7	67399	795.559	-1.58627	0.0953564	-16.6351	3.87818e-62	3.00901e-60
ENSMUSG00000024338	Psmb8	16913	2970.48	1.30948	0.0790069	16.5742	1.0699e-61	8.26646e-60
ENSMUSG00000028073	Pear1	73182	581.229	-1.74164	0.105399	-16.5243	2.45176e-61	1.88642e-59
ENSMUSG00000041959	S100a10	20194	1194.09	-1.23136	0.0745596	-16.5151	2.85695e-61	2.18906e-59
ENSMUSG00000042029	Ncapg2	76044	1111.24	-1.63855	0.0992998	-16.501	3.6072e-61	2.7525e-59
ENSMUSG00000029910	Mad2l1	56150	697.752	-1.73171	0.105043	-16.4858	4.64452e-61	3.52945e-59
ENSMUSG00000038615	Nfe2l1	18023	11504.6	0.672751	0.0408923	16.4518	8.14455e-61	6.16382e-59
ENSMUSG00000037405	Icam1	15894	8196.66	1.24277	0.0756187	16.4347	1.07889e-60	8.13174e-59
ENSMUSG00000032333	Stoml1	69106	1480.83	1.14563	0.0697736	16.4193	1.39171e-60	1.04469e-58
ENSMUSG00000042265	Trem1	58217	302.965	-2.72305	0.166027	-16.4012	1.87407e-60	1.40107e-58
ENSMUSG00000023505	Cdca3	14793	320.371	-2.26723	0.13835	-16.3876	2.34622e-60	1.74699e-58
ENSMUSG00000043895	S1pr2	14739	8130.18	0.630043	0.0384819	16.3725	3.00833e-60	2.23099e-58
ENSMUSG00000027215	Cd82	12521	4392.29	0.877877	0.0536506	16.3628	3.52335e-60	2.60249e-58
ENSMUSG00000028873	Cdca8	52276	595.18	-1.74005	0.106351	-16.3614	3.60829e-60	2.65461e-58
ENSMUSG00000007080	Pole	18973	305.886	-2.61396	0.15986	-16.3515	4.24102e-60	3.10772e-58
ENSMUSG00000020671	Rab10	19325	17725	0.567549	0.0347212	16.3459	4.65256e-60	3.39582e-58
ENSMUSG00000031155	Pim2	18715	338.726	2.02054	0.123755	16.327	6.34747e-60	4.61466e-58
ENSMUSG00000030403	Vasp	22323	7698.79	0.953737	0.058632	16.2665	1.70634e-59	1.23566e-57
ENSMUSG00000037706	Cd81	12520	12099.4	-0.547339	0.0336791	-16.2516	2.17607e-59	1.56966e-57
ENSMUSG00000027326	Knl1	76464	266.604	-2.68967	0.165679	-16.2342	2.88817e-59	2.07521e-57
ENSMUSG00000010755	Cars	27267	3245.75	0.837323	0.0515841	16.2322	2.98633e-59	2.13742e-57
ENSMUSG00000067203	H2-K2	630499	1266.02	1.4493	0.0895127	16.191	5.83728e-59	4.16182e-57
ENSMUSG00000016382	Pls3	102866	2495.09	-0.945368	0.0585323	-16.1512	1.11342e-58	7.90787e-57
ENSMUSG00000021806	Nid2	18074	539.834	-2.02862	0.125611	-16.15	1.13629e-58	8.03935e-57
ENSMUSG00000022014	Epsti1	108670	1880.7	1.66191	0.102934	16.1454	1.22429e-58	8.62893e-57
ENSMUSG00000001467	Cyp51	13121	1432.69	1.14691	0.0710518	16.1419	1.29593e-58	9.09914e-57
ENSMUSG00000036086	Zranb3	226409	1291.43	-1.55995	0.0967918	-16.1165	1.95313e-58	1.36615e-56
ENSMUSG00000030677	Kif22	110033	469.243	-2.22504	0.138195	-16.1007	2.52147e-58	1.75704e-56
ENSMUSG00000073411	H2-D1	14964	70747.8	0.559049	0.0347742	16.0765	3.72696e-58	2.58729e-56
ENSMUSG00000027533	Fabp5	16592	18135	0.659793	0.0411152	16.0474	5.95837e-58	4.12087e-56
ENSMUSG00000015880	Ncapg	54392	328.821	-2.60853	0.162709	-16.0318	7.66074e-58	5.27848e-56
ENSMUSG00000026628	Atf3	11910	10449.8	0.73565	0.0459457	16.0113	1.06546e-57	7.31405e-56
ENSMUSG00000038418	Egr1	13653	1639.51	-1.90735	0.119349	-15.9813	1.72619e-57	1.18059e-55
ENSMUSG00000024556	Me2	107029	1762.51	-0.908971	0.056939	-15.964	2.27829e-57	1.55243e-55
ENSMUSG00000054203	Ifi205	226695	1164.42	4.27337	0.267952	15.9483	2.92762e-57	1.98756e-55
ENSMUSG00000078921	Tgtp2	100039796	627.011	4.4608	0.280464	15.905	5.84629e-57	3.95449e-55
ENSMUSG00000034116	Vav1	22324	16283	0.534855	0.0336731	15.8838	8.21054e-57	5.53342e-55
ENSMUSG00000026605	Cenpf	108000	332.454	-2.67941	0.168719	-15.8809	8.59063e-57	5.76853e-55
ENSMUSG00000079507	H2-Q1	15006	1493.57	1.39039	0.0875793	15.8757	9.33145e-57	6.24328e-55
ENSMUSG00000022371	Col14a1	12818	4439.76	-1.22187	0.0770219	-15.864	1.12517e-56	7.50083e-55
ENSMUSG00000000682	Cd52	23833	9292.45	0.881541	0.055663	15.8371	1.72604e-56	1.14651e-54
ENSMUSG00000001211	Agpat3	28169	8084.37	0.621743	0.0393808	15.788	3.76588e-56	2.4925e-54
ENSMUSG00000021322	Aoah	27052	5456.96	0.767438	0.0487083	15.7558	6.26627e-56	4.1326e-54
ENSMUSG00000034349	Smc4	70099	1416.77	-1.1012	0.0699929	-15.7331	8.97675e-56	5.8991e-54
ENSMUSG00000030275	Etnk1	75320	7856.96	1.06126	0.0674667	15.7301	9.40752e-56	6.16026e-54
ENSMUSG00000046179	E2f8	108961	221.286	-2.64673	0.168343	-15.7223	1.06441e-55	6.94539e-54
ENSMUSG00000012519	Mlkl	74568	827.788	1.82796	0.116302	15.7174	1.14933e-55	7.47304e-54
ENSMUSG00000040010	Slc7a5	20539	1112.68	1.52477	0.0970978	15.7034	1.4326e-55	9.28226e-54
ENSMUSG00000045636	Mtus1	102103	2541.24	-0.973536	0.0622427	-15.641	3.82894e-55	2.47221e-53
ENSMUSG00000021811	Dnajc9	108671	890.682	-1.15834	0.07407	-15.6385	3.9786e-55	2.55989e-53
ENSMUSG00000049401	Ogfr	72075	4628.97	1.42574	0.0911753	15.6374	4.04952e-55	2.59647e-53
ENSMUSG00000057596	Trim30d	209387	968.034	2.16768	0.138695	15.6291	4.60938e-55	2.94522e-53
ENSMUSG00000054072	Iigp1	60440	550.6	6.05949	0.388664	15.5906	8.43803e-55	5.37299e-53
ENSMUSG00000026466	Tor1aip1	208263	6869.34	0.908143	0.0583974	15.5511	1.56455e-54	9.92817e-53
ENSMUSG00000002835	Chaf1a	27221	589.536	-1.75468	0.112881	-15.5445	1.73384e-54	1.09648e-52
ENSMUSG00000027639	Samhd1	56045	4586.57	1.41416	0.0911939	15.5072	3.10159e-54	1.95474e-52
ENSMUSG00000047454	Gphn	268566	780.978	1.24938	0.0805884	15.5033	3.29727e-54	2.071e-52
ENSMUSG00000046031	Calhm6	215900	367.949	3.33923	0.215784	15.4749	5.12636e-54	3.20893e-52
ENSMUSG00000024339	Tap2	21355	1753.35	1.25524	0.0813542	15.4293	1.03973e-53	6.48638e-52
ENSMUSG00000045294	Insig1	231070	2521.72	1.01503	0.0658048	15.4248	1.11421e-53	6.92762e-52
ENSMUSG00000028718	Stil	20460	241.09	-2.18467	0.14198	-15.3872	1.99577e-53	1.23671e-51
ENSMUSG00000024079	Eif2ak2	19106	2064.33	1.49148	0.097056	15.3672	2.7185e-53	1.67892e-51
ENSMUSG00000026478	Lamc1	226519	4251.83	-0.857837	0.0558535	-15.3587	3.09764e-53	1.9067e-51
ENSMUSG00000039531	Zup1	72580	1518.22	1.33613	0.087163	15.3291	4.8904e-53	3.00021e-51
ENSMUSG00000021457	Syk	20963	13278.7	0.480501	0.0313727	15.3159	5.9868e-53	3.66067e-51
ENSMUSG00000025969	Nrp2	18187	24771.2	0.768647	0.0502991	15.2815	1.01529e-52	6.18755e-51
ENSMUSG00000024451	Arap3	106952	5149.08	-0.680171	0.0446998	-15.2164	2.75161e-52	1.67142e-50
ENSMUSG00000050410	Tcf19	106795	299.524	-2.55153	0.16794	-15.1931	3.92883e-52	2.37868e-50
ENSMUSG00000032000	Birc3	11796	4031.82	0.962844	0.063409	15.1847	4.46891e-52	2.69682e-50
ENSMUSG00000022322	Shcbp1	20419	278.385	-2.78021	0.183553	-15.1466	7.97415e-52	4.79644e-50
ENSMUSG00000030717	Nupr1	56312	1391.55	1.21442	0.0801859	15.1451	8.163e-52	4.89409e-50
ENSMUSG00000048578	Mlec	109154	12490.4	-0.738987	0.0488961	-15.1134	1.32101e-51	7.89443e-50
ENSMUSG00000015837	Sqstm1	18412	52580.3	0.446604	0.0295729	15.1018	1.57559e-51	9.38545e-50
ENSMUSG00000010358	Ifi35	70110	1145.3	1.78607	0.118297	15.0981	1.66573e-51	9.89045e-50
ENSMUSG00000017499	Cdc6	23834	216.374	-2.64279	0.175067	-15.0958	1.72511e-51	1.02102e-49
ENSMUSG00000000982	Ccl3	20302	5288.33	1.19201	0.0790251	15.084	2.06469e-51	1.2181e-49
ENSMUSG00000022216	Psme1	19186	5495.95	0.973294	0.0645452	15.0793	2.21748e-51	1.30408e-49
ENSMUSG00000028678	Kif2c	73804	358.196	-2.58016	0.171302	-15.0621	2.87593e-51	1.68593e-49
ENSMUSG00000035697	Arhgap45	70719	13060.5	-0.594667	0.0395837	-15.023	5.18949e-51	3.03257e-49
ENSMUSG00000028044	Cks1b	54124	653.291	-1.31254	0.0876953	-14.967	1.20574e-50	7.0237e-49
ENSMUSG00000022906	Parp9	80285	3016.27	1.5381	0.102978	14.9362	1.91647e-50	1.11288e-48
ENSMUSG00000025151	Maged1	94275	4156.5	-0.624807	0.0418737	-14.9212	2.39857e-50	1.38846e-48
ENSMUSG00000101389	Ms4a4a	666907	2496.17	1.64151	0.110339	14.877	4.64876e-50	2.68262e-48
ENSMUSG00000025586	Cpeb1	12877	771.112	-1.48457	0.0998093	-14.874	4.86074e-50	2.79621e-48
ENSMUSG00000024675	Ms4a4c	64380	306.877	3.36715	0.226602	14.8593	6.05563e-50	3.47277e-48
ENSMUSG00000006800	Sulf2	72043	1869.29	-1.11667	0.0753218	-14.8254	1.00422e-49	5.72342e-48
ENSMUSG00000026482	Rgl1	19731	2956.57	1.45921	0.0987349	14.7791	1.99923e-49	1.13593e-47
ENSMUSG00000059040	Eno1b	433182	27311.1	-0.633396	0.0429459	-14.7487	3.13627e-49	1.77651e-47
ENSMUSG00000015396	Cd83	12522	20628	0.654518	0.044414	14.7368	3.74341e-49	2.11394e-47
ENSMUSG00000027646	Src	20779	969.348	1.79901	0.122131	14.7302	4.12566e-49	2.3227e-47
ENSMUSG00000026657	Frmd4a	209630	2659.32	1.22194	0.0829685	14.7277	4.2799e-49	2.40221e-47
ENSMUSG00000034947	Tmem106a	217203	12748.3	0.68029	0.0462689	14.7029	6.17157e-49	3.45346e-47
ENSMUSG00000028232	Tmem68	72098	2445.03	0.748089	0.050933	14.6877	7.72848e-49	4.31161e-47
ENSMUSG00000029798	Herc6	67138	2574.49	2.59201	0.176501	14.6855	7.98172e-49	4.43947e-47
ENSMUSG00000015733	Capza2	12343	33137.6	0.640078	0.0435987	14.6811	8.51424e-49	4.72144e-47
ENSMUSG00000024084	Qpct	70536	700.344	-1.55705	0.106393	-14.6349	1.68326e-48	9.30631e-47
ENSMUSG00000030156	Cd69	12515	1125.03	3.04493	0.208085	14.6331	1.7276e-48	9.52292e-47
ENSMUSG00000017002	Slpi	20568	259.103	-2.04809	0.139966	-14.6328	1.73534e-48	9.53711e-47
ENSMUSG00000045751	Mms22l	212377	454.618	-1.73806	0.118795	-14.6307	1.7881e-48	9.79793e-47
ENSMUSG00000044345	Marveld1	277010	686.264	-1.52405	0.104348	-14.6055	2.59247e-48	1.41635e-46
ENSMUSG00000020330	Hmmr	15366	450.011	-2.31198	0.15855	-14.582	3.65408e-48	1.99045e-46
ENSMUSG00000082691	Dynlt1-ps1	100043890	2041.56	-0.791486	0.0543018	-14.5757	4.01066e-48	2.17826e-46
ENSMUSG00000069662	Marcks	17118	21328.6	0.630312	0.043249	14.574	4.1102e-48	2.22578e-46
ENSMUSG00000034906	Ncaph	215387	1188.53	-1.06801	0.0734195	-14.5468	6.12421e-48	3.30672e-46
ENSMUSG00000074280	Gm6166	101056162	6235.61	0.622707	0.0428085	14.5463	6.16186e-48	3.31734e-46
ENSMUSG00000035004	Igsf6	80719	10465.9	0.774699	0.0533508	14.5209	8.93863e-48	4.79828e-46
ENSMUSG00000061666	Gdpd1	66569	4190.9	0.547442	0.0377128	14.5161	9.58298e-48	5.12926e-46
ENSMUSG00000034575	Tent4a	210106	1675.08	1.57499	0.108502	14.5158	9.62312e-48	5.13585e-46
ENSMUSG00000015340	Cybb	13058	92138.7	0.593609	0.0408951	14.5154	9.6758e-48	5.14909e-46
ENSMUSG00000047592	Nxpe5	381680	1248.1	-1.489	0.102611	-14.5111	1.03076e-47	5.46953e-46
ENSMUSG00000038612	Mcl1	17210	34877.4	0.477864	0.0329648	14.4962	1.28032e-47	6.77432e-46
ENSMUSG00000073489	Ifi204	15951	5767.21	2.81311	0.194074	14.495	1.30242e-47	6.87156e-46
ENSMUSG00000037544	Dlgap5	218977	274.172	-2.16785	0.149577	-14.4932	1.3378e-47	7.03813e-46
ENSMUSG00000018930	Ccl4	20303	4471.4	1.2758	0.0880442	14.4904	1.39258e-47	7.3055e-46
ENSMUSG00000091705	H2-Q2	15013	624.906	1.45207	0.100352	14.4698	1.88108e-47	9.84024e-46
ENSMUSG00000033538	Casp4	12363	652.374	1.41727	0.0979584	14.4681	1.92701e-47	1.0052e-45
ENSMUSG00000037242	Clic4	29876	25512.5	0.552529	0.0382049	14.4623	2.09757e-47	1.09109e-45
ENSMUSG00000026536	Ifi211	381308	3213.46	3.25268	0.224953	14.4594	2.18854e-47	1.13521e-45
ENSMUSG00000028212	Ccne2	12448	221	-2.3676	0.163959	-14.4402	2.89095e-47	1.49536e-45
ENSMUSG00000037321	Tap1	21354	2885.44	2.19769	0.152328	14.4274	3.47907e-47	1.79454e-45
ENSMUSG00000033952	Aspm	12316	277.443	-2.25263	0.156284	-14.4137	4.24466e-47	2.18334e-45
ENSMUSG00000006715	Gmnn	57441	669.964	-1.21306	0.0843171	-14.3869	6.25314e-47	3.20751e-45
ENSMUSG00000055805	Fmnl1	57778	6448.66	-0.642212	0.0446902	-14.3703	7.94789e-47	4.06553e-45
ENSMUSG00000020272	Stk10	20868	4567.46	-0.63814	0.0444414	-14.3591	9.34032e-47	4.76459e-45
ENSMUSG00000067916	Zfp991	666532	1663.43	0.846329	0.0589462	14.3577	9.54052e-47	4.85331e-45
ENSMUSG00000026104	Stat1	20846	2058.92	2.41453	0.168253	14.3506	1.05668e-46	5.36061e-45
ENSMUSG00000017861	Mybl2	17865	197.594	-2.80342	0.195376	-14.3489	1.08263e-46	5.47721e-45
ENSMUSG00000004952	Rasa4	54153	6993.3	0.764374	0.0532755	14.3476	1.10344e-46	5.56723e-45
ENSMUSG00000018796	Acsl1	14081	3672.78	0.854227	0.0595499	14.3447	1.14947e-46	5.78369e-45
ENSMUSG00000054520	Sh3bp2	24055	5792.71	0.545039	0.0380088	14.3398	1.23364e-46	6.19031e-45
ENSMUSG00000028709	Mob3c	100465	1518.6	0.966971	0.0674711	14.3316	1.38808e-46	6.94643e-45
ENSMUSG00000069874	Irgm2	54396	2187.73	2.59708	0.181469	14.3114	1.8569e-46	9.26746e-45
ENSMUSG00000042350	Arel1	68497	2929.22	0.969144	0.0677574	14.3032	2.09121e-46	1.04087e-44
ENSMUSG00000052031	Tagap1	380608	1948.48	0.900062	0.0629606	14.2956	2.32972e-46	1.15647e-44
ENSMUSG00000037997	Parp11	101187	1404.33	1.47963	0.103657	14.2743	3.16339e-46	1.56609e-44
ENSMUSG00000017737	Mmp9	17395	32846.1	0.541901	0.0380572	14.2391	5.23742e-46	2.58594e-44
ENSMUSG00000002985	Apoe	11816	1.30735e+06	0.691941	0.0486393	14.226	6.32277e-46	3.1135e-44
ENSMUSG00000011008	Mcoln2	68279	2820.24	0.901059	0.0633522	14.223	6.59676e-46	3.23978e-44
ENSMUSG00000032555	Topbp1	235559	2234.45	-0.932296	0.065598	-14.2123	7.69009e-46	3.76672e-44
ENSMUSG00000024660	Incenp	16319	2799.59	-0.720998	0.050735	-14.2111	7.82241e-46	3.82139e-44
ENSMUSG00000050565	Tor1aip2	240832	8799.11	0.910301	0.0640591	14.2103	7.90458e-46	3.85135e-44
ENSMUSG00000029994	Anxa4	11746	17204.4	0.502364	0.0354194	14.1833	1.16252e-45	5.64922e-44
ENSMUSG00000005233	Spc25	66442	410.715	-1.94239	0.137019	-14.1761	1.28833e-45	6.24415e-44
ENSMUSG00000027276	Jag1	16449	5370.03	-0.88234	0.0622943	-14.164	1.52934e-45	7.39286e-44
ENSMUSG00000021451	Sema4d	20354	25970.1	0.597671	0.0422872	14.1336	2.35761e-45	1.1367e-43
ENSMUSG00000020808	Pimreg	109212	246.146	-2.62345	0.186125	-14.0951	4.07356e-45	1.95891e-43
ENSMUSG00000028268	Gbp3	55932	1113.08	3.2709	0.232184	14.0875	4.53019e-45	2.17284e-43
ENSMUSG00000064193	Gm4735	103324	25033.7	-0.624326	0.0444322	-14.0512	7.5748e-45	3.62374e-43
ENSMUSG00000028702	Rad54l	19366	347.956	-1.81298	0.129037	-14.0501	7.68773e-45	3.66826e-43
ENSMUSG00000037731	Themis2	230787	5559.45	1.07494	0.076591	14.0348	9.54521e-45	4.54283e-43
ENSMUSG00000022463	Srebf2	20788	3328.43	0.789574	0.0562618	14.0339	9.66457e-45	4.58781e-43
ENSMUSG00000030830	Itgal	16408	2096.13	1.10654	0.0789599	14.0139	1.28175e-44	6.06893e-43
ENSMUSG00000042082	Arsb	11881	4865.12	-0.608241	0.043413	-14.0106	1.34319e-44	6.34356e-43
ENSMUSG00000006818	Sod2	20656	22006.5	0.786536	0.0561962	13.9963	1.64299e-44	7.73965e-43
ENSMUSG00000022575	Gsdmd	69146	4386.9	0.687178	0.0491362	13.9852	1.92011e-44	9.0221e-43
ENSMUSG00000082292	Gm12250	631323	755.808	3.80652	0.272193	13.9846	1.93462e-44	9.06716e-43
ENSMUSG00000021133	Susd6	217684	17824.2	0.54351	0.0389081	13.9691	2.40724e-44	1.12537e-42
ENSMUSG00000022148	Fyb	23880	9355.38	0.595567	0.0426494	13.9642	2.57627e-44	1.20135e-42
ENSMUSG00000074141	Il4i1	14204	328.996	1.92766	0.13833	13.9352	3.86874e-44	1.7995e-42
ENSMUSG00000035273	Hpse	15442	7296.27	0.7342	0.0527028	13.9309	4.10895e-44	1.90643e-42
ENSMUSG00000031838	Ifi30	65972	2959.76	-0.745708	0.0536076	-13.9105	5.47103e-44	2.53203e-42
ENSMUSG00000051220	Ercc6l	236930	282.435	-1.99689	0.143644	-13.9017	6.18572e-44	2.85564e-42
ENSMUSG00000025001	Hells	15201	558.706	-1.61608	0.116307	-13.8949	6.79802e-44	3.13048e-42
ENSMUSG00000024661	Fth1	14319	1.03901e+06	0.483431	0.0347995	13.8919	7.09586e-44	3.25951e-42
ENSMUSG00000078122	F630028O10Rik	100038363	703.783	-1.90368	0.13709	-13.8863	7.66673e-44	3.513e-42
ENSMUSG00000024677	Ms4a6b	69774	4318.65	1.21727	0.0876855	13.8823	8.11195e-44	3.7078e-42
ENSMUSG00000024953	Prdx5	54683	28936.4	0.67243	0.0484593	13.8762	8.83211e-44	4.027e-42
ENSMUSG00000026656	Fcgr2b	14130	41236.8	-0.491842	0.0354534	-13.8729	9.24458e-44	4.20469e-42
ENSMUSG00000008035	Mid1ip1	68041	1789.9	-0.805763	0.0580867	-13.8717	9.39943e-44	4.26462e-42
ENSMUSG00000026779	Mastl	67121	206.667	-2.41181	0.173955	-13.8645	1.03904e-43	4.70268e-42
ENSMUSG00000033031	Cip2a	224171	299.01	-1.80216	0.13033	-13.8277	1.73426e-43	7.83006e-42
ENSMUSG00000021965	Ska3	219114	198.757	-2.67655	0.193631	-13.8229	1.85387e-43	8.34965e-42
ENSMUSG00000073402	Gm8909	667977	366.852	1.54289	0.111692	13.8138	2.1045e-43	9.45542e-42
ENSMUSG00000015947	Fcgr1	14129	5503.84	1.82855	0.132374	13.8135	2.11432e-43	9.47648e-42
ENSMUSG00000026879	Gsn	227753	18522	-0.508227	0.0367938	-13.8129	2.13216e-43	9.5333e-42
ENSMUSG00000023307	2021-03-05	69104	4008.99	1.08193	0.0783389	13.8109	2.19138e-43	9.77441e-42
ENSMUSG00000021892	Sh3bp5	24056	7020.26	0.631575	0.0457366	13.809	2.2501e-43	1.00121e-41
ENSMUSG00000004266	Ptpn6	15170	15897.8	0.469151	0.0339935	13.8012	2.50622e-43	1.11249e-41
ENSMUSG00000037902	Sirpa	19261	122040	0.44319	0.0321374	13.7905	2.90788e-43	1.2877e-41
ENSMUSG00000030148	Clec4a2	26888	1125.51	1.15691	0.0839115	13.7873	3.03849e-43	1.34231e-41
ENSMUSG00000063229	Ldha	16828	40996.4	-0.510466	0.0370285	-13.7857	3.10569e-43	1.36873e-41
ENSMUSG00000102037	Bcl2a1a	12044	4615.44	1.11792	0.0812281	13.7627	4.2727e-43	1.87856e-41
ENSMUSG00000024590	Lmnb1	16906	716.393	-1.92312	0.139786	-13.7576	4.58186e-43	2.00971e-41
ENSMUSG00000026669	Mcm10	70024	329.623	-1.82028	0.132388	-13.7497	5.11735e-43	2.23926e-41
ENSMUSG00000030103	Bhlhe40	20893	1535.25	-1.01675	0.0741321	-13.7154	8.21644e-43	3.58687e-41
ENSMUSG00000054404	Slfn5	327978	6271.24	2.61131	0.190959	13.6747	1.43711e-42	6.25887e-41
ENSMUSG00000025795	Rassf3	192678	8259.84	-0.816076	0.0597081	-13.6677	1.58215e-42	6.87434e-41
ENSMUSG00000041936	Agrn	11603	1075.4	1.54426	0.112988	13.6675	1.58713e-42	6.87978e-41
ENSMUSG00000058135	Gstm1	14862	7370.04	0.720596	0.0527401	13.6632	1.68479e-42	7.28604e-41
ENSMUSG00000029826	Zc3hav1	78781	3664.62	1.01254	0.0742055	13.645	2.16072e-42	9.32238e-41
ENSMUSG00000023961	Enpp4	224794	1503.23	1.55458	0.114071	13.6282	2.7207e-42	1.17111e-40
ENSMUSG00000038379	Ttk	22137	186.937	-2.61468	0.19217	-13.6061	3.6852e-42	1.58258e-40
ENSMUSG00000027331	Knstrn	51944	365.551	-1.98465	0.145896	-13.6032	3.83448e-42	1.64287e-40
ENSMUSG00000021947	Cryl1	68631	2281.91	-0.719172	0.0529077	-13.593	4.40872e-42	1.88452e-40
ENSMUSG00000018167	Stard3	59045	4571.77	1.04499	0.0768978	13.5893	4.63696e-42	1.97751e-40
ENSMUSG00000040699	Limd2	67803	9638.96	0.644913	0.0475396	13.5658	6.38889e-42	2.71837e-40
ENSMUSG00000061132	Blnk	17060	7695.83	0.507972	0.037459	13.5608	6.84205e-42	2.90449e-40
ENSMUSG00000046879	Irgm1	15944	4755.98	2.20606	0.162761	13.554	7.50235e-42	3.17749e-40
ENSMUSG00000003134	Tbc1d8	54610	2586.99	0.669376	0.0493963	13.5511	7.80109e-42	3.29645e-40
ENSMUSG00000030921	Trim30a	20128	6969.97	1.87552	0.138444	13.5471	8.24157e-42	3.47463e-40
ENSMUSG00000038886	Man2a2	140481	8155.93	-0.766047	0.0566431	-13.5241	1.12701e-41	4.74061e-40
ENSMUSG00000025044	Msr1	20288	40679.3	-0.629534	0.0465599	-13.5209	1.17677e-41	4.9387e-40
ENSMUSG00000049130	C5ar1	12273	31611.5	-0.407753	0.0301642	-13.5178	1.22844e-41	5.14387e-40
ENSMUSG00000035517	Tdrd7	100121	5050.74	0.893405	0.0661921	13.4971	1.62553e-41	6.7912e-40
ENSMUSG00000005800	Mmp8	17394	638.877	1.52423	0.112935	13.4965	1.63924e-41	6.83299e-40
ENSMUSG00000030720	Cln3	12752	5709.36	0.480234	0.0356363	13.476	2.16529e-41	9.00546e-40
ENSMUSG00000053835	H2-T24	15042	1929.6	3.35567	0.249096	13.4714	2.30487e-41	9.56444e-40
ENSMUSG00000033386	Frrs1	20321	5359.57	-0.510289	0.0379085	-13.4611	2.65118e-41	1.09769e-39
ENSMUSG00000022021	Diaph3	56419	244.458	-1.98653	0.147636	-13.4556	2.85429e-41	1.17913e-39
ENSMUSG00000044783	Hjurp	381280	1409.43	-1.08754	0.0808651	-13.4488	3.1289e-41	1.28969e-39
ENSMUSG00000081684	Rps2-ps13	546298	4217.73	-0.564285	0.0419665	-13.4461	3.24588e-41	1.33493e-39
ENSMUSG00000030107	Usp18	24110	2135.34	3.68852	0.27438	13.4431	3.38074e-41	1.3873e-39
ENSMUSG00000003948	Mmd	67468	2103.19	-0.954525	0.0710562	-13.4334	3.85416e-41	1.57807e-39
ENSMUSG00000079685	Ulbp1	77777	338.84	-1.93597	0.144122	-13.4328	3.8837e-41	1.58664e-39
ENSMUSG00000050549	Fam241a	70617	909.689	1.10042	0.0819611	13.4262	4.24754e-41	1.73146e-39
ENSMUSG00000074476	Spc24	67629	140.136	-2.61125	0.194707	-13.4112	5.20237e-41	2.11601e-39
ENSMUSG00000072437	Nanos1	332397	420.928	-1.67732	0.125111	-13.4066	5.52996e-41	2.24431e-39
ENSMUSG00000040033	Stat2	20847	6223.22	2.55626	0.190743	13.4016	5.91968e-41	2.39721e-39
ENSMUSG00000000028	Cdc45	12544	266.345	-2.13123	0.159121	-13.3938	6.57663e-41	2.65742e-39
ENSMUSG00000019082	Slc25a22	68267	1694.54	1.33852	0.100045	13.3793	7.99428e-41	3.2232e-39
ENSMUSG00000045328	Cenpe	229841	455.859	-2.21207	0.165353	-13.3778	8.15007e-41	3.27885e-39
ENSMUSG00000036875	Dna2	327762	602.892	-1.48851	0.11136	-13.3666	9.48149e-41	3.8062e-39
ENSMUSG00000031262	Cenpi	102920	264.736	-1.80199	0.134901	-13.3579	1.06512e-40	4.2665e-39
ENSMUSG00000068457	Uty	22290	583.129	-1.2904	0.0966654	-13.3491	1.19828e-40	4.78949e-39
ENSMUSG00000005370	Msh6	17688	1761.68	-0.866391	0.0649751	-13.3342	1.46418e-40	5.83964e-39
ENSMUSG00000040322	Slc25a24	229731	2350.59	-0.697924	0.0523455	-13.333	1.48762e-40	5.92032e-39
ENSMUSG00000043263	Ifi209	236312	1885	3.6001	0.27005	13.3312	1.52378e-40	6.0512e-39
ENSMUSG00000028656	Cap1	12331	23536	-0.398595	0.0299003	-13.3308	1.53273e-40	6.07369e-39
ENSMUSG00000041028	Ghitm	66092	20456	0.554077	0.0416047	13.3177	1.82764e-40	7.22679e-39
ENSMUSG00000047407	Tgif1	21815	5170.92	0.528154	0.0396814	13.3099	2.02881e-40	8.00512e-39
ENSMUSG00000030208	Emp1	13730	2285.39	-1.00138	0.0753001	-13.2985	2.3622e-40	9.30072e-39
ENSMUSG00000055435	Maf	17132	5240.5	0.649301	0.0488314	13.2968	2.41657e-40	9.49455e-39
ENSMUSG00000020134	Peli1	67245	2863.74	0.684589	0.051494	13.2945	2.4901e-40	9.76267e-39
ENSMUSG00000024587	Nars	70223	11211.7	0.476701	0.0359839	13.2476	4.65778e-40	1.82226e-38
ENSMUSG00000034422	Parp14	547253	9925.94	2.22443	0.168009	13.2399	5.16119e-40	2.01494e-38
ENSMUSG00000049625	Tifab	212937	3455.86	-0.707929	0.0535008	-13.2321	5.72556e-40	2.23055e-38
ENSMUSG00000026956	Uap1l1	227620	12346.4	0.457355	0.0345662	13.2313	5.78814e-40	2.25019e-38
ENSMUSG00000078300	Gm2606	100040109	3284.48	-0.598667	0.0452852	-13.2199	6.73152e-40	2.61143e-38
ENSMUSG00000078922	Tgtp1	21822	375.011	4.35865	0.329785	13.2166	7.03431e-40	2.72318e-38
ENSMUSG00000021676	Iqgap2	544963	4687.17	-0.784541	0.0594157	-13.2043	8.2902e-40	3.20265e-38
ENSMUSG00000035208	Slfn8	276950	3225.71	2.35541	0.178484	13.1968	9.15698e-40	3.53012e-38
ENSMUSG00000003206	Ebi3	50498	1125.84	1.08714	0.0824305	13.1886	1.02092e-39	3.92755e-38
ENSMUSG00000027808	Serp1	28146	26689.6	0.590322	0.0447725	13.1849	1.07156e-39	4.1138e-38
ENSMUSG00000040483	Xaf1	327959	1426.12	2.6275	0.199331	13.1816	1.11988e-39	4.29038e-38
ENSMUSG00000078920	Ifi47	15953	1973.49	3.01777	0.228972	13.1796	1.14946e-39	4.39462e-38
ENSMUSG00000067235	H2-Q10	15007	460.045	1.44648	0.109889	13.1631	1.43145e-39	5.46139e-38
ENSMUSG00000024772	Ehd1	13660	23908.9	0.866592	0.0659923	13.1317	2.1669e-39	8.25031e-38
ENSMUSG00000091957	Rps2-ps10	667279	6245.8	-0.555697	0.0423226	-13.13	2.21523e-39	8.41696e-38
ENSMUSG00000027358	Bmp2	12156	3972.97	0.760705	0.0580277	13.1094	2.9106e-39	1.10364e-37
ENSMUSG00000026031	Cflar	12633	8144.39	0.70479	0.0537993	13.1004	3.27742e-39	1.24018e-37
ENSMUSG00000029096	Htra3	78558	311.588	-2.01039	0.153528	-13.0946	3.5332e-39	1.33423e-37
ENSMUSG00000026942	Traf2	22030	1953.07	0.791511	0.0604498	13.0937	3.57791e-39	1.34836e-37
ENSMUSG00000028630	Dyrk2	69181	1184.92	0.877732	0.0671106	13.0789	4.34736e-39	1.635e-37
ENSMUSG00000044092	C130050O18Rik	319772	833.295	-1.21088	0.0926982	-13.0626	5.38281e-39	2.02031e-37
ENSMUSG00000038776	Ephx1	13849	2485.44	-0.662023	0.0506958	-13.0587	5.66592e-39	2.12225e-37
ENSMUSG00000035683	Melk	17279	351.834	-1.92767	0.14766	-13.0548	5.96728e-39	2.2306e-37
ENSMUSG00000094724	Rnaset2b	68195	18170.7	0.495039	0.0380106	13.0237	8.96852e-39	3.34571e-37
ENSMUSG00000066861	Oas1g	23960	3533.37	2.61345	0.200925	13.0071	1.11509e-38	4.15147e-37
ENSMUSG00000043664	Tmem221	434325	2143.46	0.856226	0.0659923	12.9746	1.70405e-38	6.33138e-37
ENSMUSG00000036880	Acaa2	52538	2173.14	-0.679405	0.0523765	-12.9715	1.77409e-38	6.57837e-37
ENSMUSG00000034317	Trim59	66949	695.933	-1.37195	0.105914	-12.9535	2.24553e-38	8.30983e-37
ENSMUSG00000023341	Mx2	17858	472.929	3.84486	0.297065	12.9428	2.57978e-38	9.52766e-37
ENSMUSG00000001542	Ell2	192657	6002.93	0.60368	0.0466722	12.9345	2.87592e-38	1.06001e-36
ENSMUSG00000062515	Fabp4	11770	1231.1	0.866582	0.0670117	12.9318	2.97808e-38	1.09548e-36
ENSMUSG00000027994	Mcub	66815	994.664	-0.888297	0.0686965	-12.9307	3.01929e-38	1.10843e-36
ENSMUSG00000038507	Parp12	243771	5587.34	2.00223	0.155331	12.8901	5.11857e-38	1.87167e-36
ENSMUSG00000068245	Phf11d	219132	3058.36	2.85297	0.221564	12.8765	6.10215e-38	2.22692e-36
ENSMUSG00000019832	Rab32	67844	7561.55	-0.484008	0.0376305	-12.8621	7.35289e-38	2.67281e-36
ENSMUSG00000020101	Vsir	74048	14167.3	-0.74146	0.057669	-12.8572	7.84018e-38	2.84434e-36
ENSMUSG00000070501	Ifi214	545384	197.387	3.67518	0.285898	12.8549	8.07782e-38	2.9248e-36
ENSMUSG00000026896	Ifih1	71586	2180.85	2.03601	0.15845	12.8495	8.65249e-38	3.12675e-36
ENSMUSG00000058715	Fcer1g	14127	41694.5	0.489106	0.0381205	12.8305	1.10622e-37	3.98197e-36
ENSMUSG00000072082	Ccnf	12449	522.945	-1.63588	0.127499	-12.8306	1.10572e-37	3.98197e-36
ENSMUSG00000022945	Chaf1b	110749	614.052	-1.25458	0.0978291	-12.8242	1.19961e-37	4.30974e-36
ENSMUSG00000095567	Noc2l	57741	4203.6	0.509266	0.0397241	12.8201	1.26578e-37	4.53862e-36
ENSMUSG00000037725	Ckap2	80986	205.328	-2.2168	0.173099	-12.8065	1.50748e-37	5.39478e-36
ENSMUSG00000001270	Ckb	12709	7970.37	-0.475011	0.037101	-12.8032	1.57318e-37	5.61904e-36
ENSMUSG00000034311	Kif4	16571	242.233	-2.55229	0.199384	-12.8009	1.62077e-37	5.77783e-36
ENSMUSG00000095687	Rnaset2a	100037283	20106.7	0.482009	0.0376945	12.7872	1.932e-37	6.87404e-36
ENSMUSG00000070034	Sp110	109032	2240.65	1.32736	0.103888	12.7768	2.20849e-37	7.84269e-36
ENSMUSG00000040296	Ddx58	230073	4208.59	2.36179	0.184917	12.7722	2.34402e-37	8.308e-36
ENSMUSG00000027203	Dut	110074	285.477	-1.71961	0.13468	-12.7681	2.47081e-37	8.7406e-36
ENSMUSG00000017830	Dhx58	80861	2175.46	2.32307	0.181959	12.767	2.50701e-37	8.8517e-36
ENSMUSG00000024795	Kif20b	240641	382.661	-1.794	0.140559	-12.7634	2.62593e-37	9.2539e-36
ENSMUSG00000024516	Sec11c	66286	3184.5	-0.613333	0.0480749	-12.7579	2.81824e-37	9.9127e-36
ENSMUSG00000017146	Brca1	12189	345.429	-1.88339	0.147649	-12.7558	2.89258e-37	1.01548e-35
ENSMUSG00000029291	Rufy3	52822	2663.96	0.728245	0.0572126	12.7288	4.09309e-37	1.43421e-35
ENSMUSG00000025915	Sgk3	170755	5279.01	0.580418	0.0456171	12.7237	4.36673e-37	1.5272e-35
ENSMUSG00000038390	Gpr162	14788	385.008	1.42244	0.111816	12.7213	4.50088e-37	1.57114e-35
ENSMUSG00000015355	Cd48	12506	10156.4	0.501428	0.0394629	12.7063	5.4548e-37	1.90054e-35
ENSMUSG00000019823	Mical1	171580	1102.33	-1.06274	0.0837359	-12.6916	6.58378e-37	2.28957e-35
ENSMUSG00000036768	Kif15	209737	221.53	-2.55221	0.201225	-12.6834	7.31031e-37	2.53745e-35
ENSMUSG00000056234	Ncoa4	27057	16504.7	0.535958	0.0422602	12.6824	7.40713e-37	2.56623e-35
ENSMUSG00000035692	Isg15	100038882	2080.45	4.36636	0.344907	12.6595	9.90891e-37	3.42655e-35
ENSMUSG00000001750	Tcirg1	27060	15808.5	0.561259	0.0443477	12.6559	1.03822e-36	3.5835e-35
ENSMUSG00000042719	Naa25	231713	2009.68	1.05202	0.08331	12.6278	1.48447e-36	5.11422e-35
ENSMUSG00000073555	Gm4951	240327	659.794	4.34295	0.344184	12.6181	1.67823e-36	5.77098e-35
ENSMUSG00000043300	B3galnt1	26879	4036.18	0.555567	0.0440627	12.6086	1.89381e-36	6.50022e-35
ENSMUSG00000003283	Hck	15162	6776.21	0.75065	0.0597648	12.5601	3.50043e-36	1.19924e-34
ENSMUSG00000078763	Slfn1	20555	127.211	4.19893	0.334765	12.5429	4.34738e-36	1.48664e-34
ENSMUSG00000019850	Tnfaip3	21929	7800.85	0.868713	0.0692931	12.5368	4.69606e-36	1.59995e-34
ENSMUSG00000033685	Ucp2	22228	36428	-0.51857	0.0413927	-12.5281	5.24295e-36	1.78299e-34
ENSMUSG00000025289	Prdx4	53381	3309.32	-0.622268	0.049718	-12.5159	6.10825e-36	2.07344e-34
ENSMUSG00000052776	Oas1a	246730	7145.6	2.23072	0.178359	12.5069	6.84242e-36	2.31839e-34
ENSMUSG00000025161	Slc16a3	80879	5307.83	-0.715562	0.057229	-12.5035	7.14442e-36	2.41628e-34
ENSMUSG00000034266	Batf	53314	522.229	1.20802	0.0966578	12.498	7.66011e-36	2.58595e-34
ENSMUSG00000037447	Arid5a	214855	985.994	1.48657	0.119036	12.4884	8.63338e-36	2.9092e-34
ENSMUSG00000030327	Necap1	67602	4160.32	0.580057	0.0464711	12.4821	9.34785e-36	3.14421e-34
ENSMUSG00000026938	Fcna	14133	12197.8	0.472707	0.0379192	12.4661	1.14226e-35	3.83509e-34
ENSMUSG00000026622	Nek2	18005	298.139	-2.26603	0.181817	-12.4632	1.18501e-35	3.97138e-34
ENSMUSG00000050103	Agmo	319660	502.308	-1.36917	0.10987	-12.4617	1.2077e-35	4.04012e-34
ENSMUSG00000037235	Mxd4	17122	1635.04	-0.708535	0.0568716	-12.4585	1.25704e-35	4.19756e-34
ENSMUSG00000027654	Fam83d	71878	90.8971	-3.2975	0.264682	-12.4583	1.25952e-35	4.19824e-34
ENSMUSG00000062232	Rapgef2	76089	3599.83	1.0499	0.0843098	12.4528	1.34986e-35	4.49125e-34
ENSMUSG00000032265	Tent5a	212943	2086.32	1.24394	0.099906	12.4511	1.37854e-35	4.57844e-34
ENSMUSG00000038175	Mylip	218203	7026.83	0.547452	0.0440139	12.4382	1.62202e-35	5.37741e-34
ENSMUSG00000036528	Ppfibp2	19024	2112.63	0.915739	0.0737287	12.4204	2.02557e-35	6.70327e-34
ENSMUSG00000099974	Bcl2a1d	12047	8414.26	0.855391	0.0689055	12.414	2.19489e-35	7.25059e-34
ENSMUSG00000026483	Fam129a	63913	2297.53	-0.884522	0.0713189	-12.4023	2.53784e-35	8.36852e-34
ENSMUSG00000091144	Phf11c	628705	199.721	2.21608	0.178861	12.3899	2.96298e-35	9.753e-34
ENSMUSG00000029304	Spp1	20750	644179	-0.648336	0.0524047	-12.3717	3.7177e-35	1.22155e-33
ENSMUSG00000049659	Aftph	216549	4581.78	0.740221	0.0599456	12.3482	4.98075e-35	1.63365e-33
ENSMUSG00000056366	Fabp3-ps1	14074	470.919	1.41305	0.114549	12.3358	5.81221e-35	1.90298e-33
ENSMUSG00000022564	Grina	66168	10120	0.448059	0.0363265	12.3342	5.92476e-35	1.9364e-33
ENSMUSG00000032294	Pkm	18746	88613.5	-0.455371	0.0369463	-12.3252	6.62704e-35	2.1621e-33
ENSMUSG00000027330	Cdc25b	12531	757.307	-1.2463	0.101125	-12.3244	6.69397e-35	2.18008e-33
ENSMUSG00000026193	Fn1	14268	40905.6	-1.35196	0.109813	-12.3114	7.86343e-35	2.55644e-33
ENSMUSG00000026142	Rhbdd1	76867	2603.63	0.618393	0.0502618	12.3035	8.67809e-35	2.81634e-33
ENSMUSG00000029516	Cit	12704	166.761	-2.57146	0.209013	-12.3028	8.7441e-35	2.83278e-33
ENSMUSG00000026687	Aldh9a1	56752	3648.97	-0.683277	0.0555471	-12.3008	8.96279e-35	2.89855e-33
ENSMUSG00000038188	Scarf1	380713	415.118	1.25714	0.10229	12.29	1.02493e-34	3.30879e-33
ENSMUSG00000037816	Fbxw17	109082	1736.72	1.03977	0.084623	12.2871	1.06216e-34	3.42301e-33
ENSMUSG00000046949	Nqo2	18105	2123.1	-0.617374	0.0502854	-12.2774	1.19795e-34	3.85391e-33
ENSMUSG00000085295	4930430E12Rik	71639	2025.52	0.920864	0.0750278	12.2736	1.25491e-34	4.03012e-33
ENSMUSG00000046688	Tifa	211550	5337.75	0.550939	0.0448989	12.2707	1.30189e-34	4.17372e-33
ENSMUSG00000019992	Mtfr2	71804	129.441	-2.45406	0.200431	-12.2439	1.81014e-34	5.79308e-33
ENSMUSG00000026821	Ralgds	19730	5427.31	1.09778	0.0896944	12.2391	1.92219e-34	6.14102e-33
ENSMUSG00000099757	BE692007	100504727	484.033	1.39025	0.113759	12.221	2.40024e-34	7.65507e-33
ENSMUSG00000032420	Nt5e	23959	363.032	-2.11972	0.173525	-12.2157	2.56351e-34	8.16169e-33
ENSMUSG00000062248	Cks2	66197	339.366	-1.33906	0.109698	-12.2067	2.86116e-34	9.09367e-33
ENSMUSG00000031639	Tlr3	142980	1031.44	1.35248	0.110824	12.2039	2.96273e-34	9.40032e-33
ENSMUSG00000038151	Prdm1	12142	2708.61	0.853792	0.0699701	12.2022	3.02383e-34	9.57769e-33
ENSMUSG00000095865	Gm13237	666390	492.297	-1.29188	0.105902	-12.1988	3.15253e-34	9.96825e-33
ENSMUSG00000010095	Slc3a2	17254	13489.8	0.600197	0.0492566	12.1851	3.73158e-34	1.1779e-32
ENSMUSG00000051212	Gpr183	321019	2262.08	-1.05256	0.086422	-12.1793	4.00947e-34	1.26346e-32
ENSMUSG00000073490	Ifi207	226691	9821.85	1.41194	0.115985	12.1734	4.30666e-34	1.3548e-32
ENSMUSG00000029363	Rfc5	72151	1123.43	-0.810081	0.0665753	-12.1679	4.60814e-34	1.44718e-32
ENSMUSG00000020142	Slc1a4	55963	205.865	2.0422	0.167867	12.1656	4.74207e-34	1.48671e-32
ENSMUSG00000021908	Gm6768	627557	12009.1	0.535224	0.0440005	12.164	4.83089e-34	1.51199e-32
ENSMUSG00000027514	Zbp1	58203	2344.37	3.78475	0.311564	12.1476	5.9101e-34	1.84663e-32
ENSMUSG00000034165	Ccnd3	12445	1168.06	-0.804571	0.0662511	-12.1443	6.15388e-34	1.91955e-32
ENSMUSG00000039735	Fnbp1l	214459	358.776	1.26545	0.10424	12.1398	6.50202e-34	2.02473e-32
ENSMUSG00000023952	Gtpbp2	56055	2128.12	0.794927	0.0655247	12.1317	7.17317e-34	2.22996e-32
ENSMUSG00000021411	Pxdc1	66895	853.769	-1.37288	0.113229	-12.1248	7.80793e-34	2.42321e-32
ENSMUSG00000060477	Irak2	108960	8765.16	0.637362	0.0525798	12.1218	8.09499e-34	2.50809e-32
ENSMUSG00000042688	Mapk6	50772	4226.45	0.605142	0.0499575	12.1131	8.99724e-34	2.78296e-32
ENSMUSG00000094627	Gm10182	100041826	1477.96	-0.765254	0.0631791	-12.1125	9.07312e-34	2.80174e-32
ENSMUSG00000017009	Sdc4	20971	3659.08	0.806549	0.0665939	12.1115	9.18442e-34	2.83138e-32
ENSMUSG00000005373	Mlxipl	58805	363.01	-1.79455	0.148246	-12.1053	9.90256e-34	3.04768e-32
ENSMUSG00000040354	Mars	216443	3987.02	0.578807	0.0479414	12.0732	1.46308e-33	4.49537e-32
ENSMUSG00000050533	Gm9845	100040853	1200.32	0.9305	0.077074	12.0728	1.47026e-33	4.50995e-32
ENSMUSG00000020100	Slc29a3	71279	7669.89	0.638872	0.0529284	12.0705	1.51201e-33	4.63032e-32
ENSMUSG00000036986	Pml	18854	2978.26	1.26208	0.10457	12.0692	1.53553e-33	4.69456e-32
ENSMUSG00000015217	Hmgb3	15354	289.898	-1.52729	0.126589	-12.065	1.61634e-33	4.93344e-32
ENSMUSG00000017754	Pltp	18830	15624.2	0.387835	0.0321468	12.0645	1.62663e-33	4.95666e-32
ENSMUSG00000022867	Usp25	30940	6520.69	0.845421	0.0701059	12.0592	1.73445e-33	5.2765e-32
ENSMUSG00000056144	Trim34a	94094	686.696	1.59844	0.132941	12.0237	2.66622e-33	8.09778e-32
ENSMUSG00000021242	Npc2	67963	21424.5	0.461649	0.0384226	12.0151	2.96147e-33	8.97971e-32
ENSMUSG00000037921	Ddx60	234311	1642.29	2.58041	0.214812	12.0124	3.05852e-33	9.25879e-32
ENSMUSG00000025747	Tyms	22171	504.749	-1.39269	0.115994	-12.0065	3.28314e-33	9.9225e-32
ENSMUSG00000060519	Tor3a	30935	14125.8	1.64081	0.136719	12.0014	3.49436e-33	1.05436e-31
ENSMUSG00000024791	Cdca5	67849	245.655	-1.71989	0.143376	-11.9957	3.74361e-33	1.12773e-31
ENSMUSG00000025888	Casp1	12362	3112.57	0.694253	0.0579267	11.985	4.25718e-33	1.28034e-31
ENSMUSG00000069893	9930111J21Rik1	667214	6825	0.865949	0.0722637	11.9832	4.35238e-33	1.30685e-31
ENSMUSG00000091649	Phf11b	236451	3421.85	2.15824	0.180288	11.9711	5.03587e-33	1.50962e-31
ENSMUSG00000030254	Rad18	58186	482.227	-1.26867	0.106109	-11.9564	6.01392e-33	1.79989e-31
ENSMUSG00000069045	Ddx3y	26900	1197.16	-0.865276	0.0723946	-11.9522	6.32097e-33	1.88872e-31
ENSMUSG00000024335	Brd2	14312	10380.5	0.519544	0.0434968	11.9444	6.94359e-33	2.07141e-31
ENSMUSG00000071715	Ncf4	17972	7412.47	0.565376	0.0474973	11.9033	1.13738e-32	3.38757e-31
ENSMUSG00000059923	Grb2	14784	12182.3	0.310285	0.0260772	11.8987	1.20201e-32	3.57429e-31
ENSMUSG00000048574	Ccnb1-ps	434175	145.946	-2.38166	0.200579	-11.874	1.61628e-32	4.79844e-31
ENSMUSG00000022270	Retreg1	66270	3762.38	-0.693739	0.0585071	-11.8574	1.97091e-32	5.84187e-31
ENSMUSG00000040253	Gbp7	229900	1924.95	2.61656	0.220771	11.8519	2.103e-32	6.22339e-31
ENSMUSG00000062510	Nsl1	381318	269.095	-1.56428	0.132127	-11.8392	2.44748e-32	7.23123e-31
ENSMUSG00000039699	Batf2	74481	196.177	2.30079	0.194368	11.8373	2.50402e-32	7.38645e-31
ENSMUSG00000022952	Runx1	12394	6849.63	0.481912	0.0407339	11.8307	2.70768e-32	7.97448e-31
ENSMUSG00000039501	Znfx1	98999	15565.2	1.60863	0.136022	11.8262	2.8569e-32	8.40055e-31
ENSMUSG00000037580	Gch1	14528	3116.01	1.08532	0.0917774	11.8256	2.87837e-32	8.45024e-31
ENSMUSG00000038644	Pold1	18971	1240.42	-0.869783	0.0735564	-11.8247	2.90936e-32	8.52765e-31
ENSMUSG00000019843	Fyn	14360	3466.93	-0.527081	0.0446634	-11.8012	3.84784e-32	1.12606e-30
ENSMUSG00000026112	Coa5	76178	11705.1	0.578548	0.0490277	11.8004	3.884e-32	1.13484e-30
ENSMUSG00000028793	Rnf19b	75234	5755.24	0.687775	0.0583599	11.7851	4.661e-32	1.35972e-30
ENSMUSG00000020493	Prr11	270906	134.223	-2.38886	0.202734	-11.7832	4.76385e-32	1.38753e-30
ENSMUSG00000034438	Gbp8	76074	102.073	3.89265	0.330366	11.7829	4.78454e-32	1.39136e-30
ENSMUSG00000034118	Tpst1	22021	1619.49	1.12086	0.0951965	11.7742	5.30147e-32	1.53926e-30
ENSMUSG00000047098	Rnf31	268749	1965.08	1.10183	0.093624	11.7686	5.66271e-32	1.64156e-30
ENSMUSG00000069892	9930111J21Rik2	245240	7986.89	0.850077	0.0723174	11.7548	6.67139e-32	1.93094e-30
ENSMUSG00000037824	Tspan14	52588	8172.25	-0.488323	0.0415446	-11.7542	6.72123e-32	1.94232e-30
ENSMUSG00000042489	Clspn	269582	88.3504	-3.50955	0.298614	-11.7528	6.82953e-32	1.97053e-30
ENSMUSG00000033220	Rac2	19354	18368	0.480585	0.0408957	11.7515	6.94109e-32	1.9996e-30
ENSMUSG00000020917	Acly	104112	13923.7	-0.413588	0.0352156	-11.7445	7.53982e-32	2.1687e-30
ENSMUSG00000023940	Sgo1	72415	135.364	-2.64259	0.225121	-11.7385	8.08755e-32	2.32262e-30
ENSMUSG00000058099	Nfam1	74039	8690.49	-0.54924	0.0468346	-11.7272	9.24311e-32	2.65036e-30
ENSMUSG00000030738	Eif3c	56347	9020.58	0.426743	0.0363991	11.724	9.60371e-32	2.74949e-30
ENSMUSG00000072620	Slfn2	20556	16848.5	1.39816	0.119449	11.7051	1.2003e-31	3.43107e-30
ENSMUSG00000039285	Azi2	27215	3906.91	0.705686	0.0602903	11.7048	1.20426e-31	3.43708e-30
ENSMUSG00000037318	Traf3ip3	215243	1250.65	-0.802001	0.0686707	-11.6789	1.63315e-31	4.65398e-30
ENSMUSG00000024401	Tnf	21926	9297.32	1.37722	0.118009	11.6705	1.80422e-31	5.13356e-30
ENSMUSG00000046157	Tmem229b	268567	2137.13	0.75836	0.0649924	11.6684	1.848e-31	5.25003e-30
ENSMUSG00000041571	Selenow	20364	1016.35	1.06328	0.0911258	11.6682	1.85202e-31	5.25336e-30
ENSMUSG00000046186	Cd109	235505	250.808	-1.85927	0.159567	-11.6519	2.24318e-31	6.35316e-30
ENSMUSG00000022817	Itgb5	16419	32696.4	-0.536763	0.0460695	-11.6512	2.26351e-31	6.40093e-30
ENSMUSG00000051343	Rab11fip5	52055	9970.82	-0.413448	0.0354921	-11.649	2.32124e-31	6.55412e-30
ENSMUSG00000026509	Capn2	12334	1368.44	-0.826703	0.0710107	-11.6419	2.52212e-31	7.11046e-30
ENSMUSG00000078771	Evi2a	14017	4454.13	0.595961	0.051199	11.6401	2.57781e-31	7.25638e-30
ENSMUSG00000095042	Gm12537	100041342	6298.03	-0.488212	0.0419449	-11.6394	2.59908e-31	7.30513e-30
ENSMUSG00000028673	Fuca1	71665	10813.8	-0.413127	0.0355019	-11.6367	2.6807e-31	7.52307e-30
ENSMUSG00000024247	Pkdcc	106522	799.074	0.934716	0.0803484	11.6333	2.79162e-31	7.82245e-30
ENSMUSG00000026946	Nmi	64685	524.265	1.43013	0.123036	11.6237	3.12423e-31	8.74123e-30
ENSMUSG00000035105	Egln3	112407	492.929	-1.2972	0.111757	-11.6073	3.78228e-31	1.05664e-29
ENSMUSG00000005054	Cstb	13014	27361.8	0.458956	0.0395669	11.5995	4.14537e-31	1.15632e-29
ENSMUSG00000028657	Ppt1	19063	13878.9	-0.447943	0.0386375	-11.5935	4.44774e-31	1.23879e-29
ENSMUSG00000071714	Csf2rb2	12984	12204	0.589794	0.0509275	11.5811	5.14089e-31	1.42969e-29
ENSMUSG00000018362	Kpna2	16647	4100.35	-0.55578	0.0480304	-11.5714	5.75216e-31	1.59728e-29
ENSMUSG00000027951	Adar	56417	5583.39	1.44629	0.125021	11.5684	5.96042e-31	1.65263e-29
ENSMUSG00000003814	Calr	12317	44203.6	-0.331744	0.0287311	-11.5465	7.68686e-31	2.12812e-29
ENSMUSG00000030557	Mef2a	17258	12763.8	-0.500165	0.0433199	-11.5458	7.74801e-31	2.14184e-29
ENSMUSG00000037434	Slc30a1	22782	1926.53	1.03056	0.0892977	11.5407	8.22857e-31	2.27128e-29
ENSMUSG00000039942	Ptger4	19219	4511.19	0.856601	0.0742528	11.5363	8.65975e-31	2.38673e-29
ENSMUSG00000006494	Pdk1	228026	4028.07	-0.752433	0.0652306	-11.535	8.79266e-31	2.41975e-29
ENSMUSG00000022034	Esco2	71988	132.663	-2.90205	0.251614	-11.5337	8.92087e-31	2.45138e-29
ENSMUSG00000079457	Gm7609	665378	123.258	3.21489	0.278814	11.5306	9.25222e-31	2.53865e-29
ENSMUSG00000026883	Dab2ip	69601	234.948	-1.84454	0.160221	-11.5125	1.14148e-30	3.12737e-29
ENSMUSG00000026341	Actr3	74117	30930.9	0.459314	0.039917	11.5067	1.22043e-30	3.33873e-29
ENSMUSG00000005804	Bloc1s6	18457	3480.91	0.546605	0.0475476	11.496	1.38241e-30	3.77628e-29
ENSMUSG00000021025	Nfkbia	18035	12757.9	0.707218	0.0616025	11.4803	1.65612e-30	4.51061e-29
ENSMUSG00000026430	Rassf5	54354	2235.08	-0.695327	0.0605897	-11.476	1.74199e-30	4.7375e-29
ENSMUSG00000031154	Otud5	54644	4203.18	0.503314	0.0439119	11.4619	2.04924e-30	5.5649e-29
ENSMUSG00000006678	Pola1	18968	694.145	-1.27458	0.111244	-11.4576	2.15395e-30	5.8321e-29
ENSMUSG00000095649	Gm8979	668108	450.423	1.96193	0.171233	11.4577	2.15259e-30	5.8321e-29
ENSMUSG00000079057	Cyp4v3	102294	5253.39	0.469328	0.0409832	11.4517	2.30516e-30	6.23237e-29
ENSMUSG00000020315	Sptbn1	20742	4628.3	-0.808534	0.0706755	-11.4401	2.63603e-30	7.11651e-29
ENSMUSG00000026480	Ncf2	17970	12323.5	-0.436035	0.0381223	-11.4378	2.70697e-30	7.29737e-29
ENSMUSG00000027447	Cst3	13010	61838.7	0.406544	0.0355963	11.421	3.28539e-30	8.84373e-29
ENSMUSG00000033781	Asb13	142688	855.818	1.12036	0.0981256	11.4176	3.4136e-30	9.17548e-29
ENSMUSG00000036617	Etl4	208618	1089.82	-1.03966	0.0911804	-11.4022	4.07487e-30	1.0937e-28
ENSMUSG00000070348	Ccnd1	12443	1447.35	-0.902585	0.0792437	-11.39	4.69069e-30	1.25716e-28
ENSMUSG00000027490	E2f1	13555	1748.64	-0.668798	0.0587709	-11.3797	5.27539e-30	1.41182e-28
ENSMUSG00000030342	Cd9	12527	30620.6	-0.478046	0.0420914	-11.3573	6.82109e-30	1.82284e-28
ENSMUSG00000036905	C1qb	12260	95045.4	0.40897	0.0360261	11.352	7.24467e-30	1.93324e-28
ENSMUSG00000062783	Csprs	114564	138.598	3.16505	0.279168	11.3374	8.56305e-30	2.28175e-28
ENSMUSG00000031133	Arhgef6	73341	5309.32	-0.562598	0.0496579	-11.3295	9.37743e-30	2.49515e-28
ENSMUSG00000063524	Eno1	13806	52119.1	-0.469073	0.041427	-11.3229	1.01094e-29	2.68604e-28
ENSMUSG00000048163	Selplg	20345	6472.81	-0.473324	0.0418112	-11.3205	1.03874e-29	2.75198e-28
ENSMUSG00000059498	Fcgr3	14131	36880.2	-0.415209	0.0366776	-11.3205	1.03843e-29	2.75198e-28
ENSMUSG00000099398	Ms4a14	383435	2802.4	0.861114	0.0761361	11.3102	1.16845e-29	3.09119e-28
ENSMUSG00000030346	Rad51ap1	19362	171.563	-2.27959	0.201588	-11.3082	1.19539e-29	3.15795e-28
ENSMUSG00000024737	Slc15a3	65221	3452.17	0.783777	0.0693304	11.305	1.24015e-29	3.27152e-28
ENSMUSG00000028378	Ptgr1	67103	1537.26	-0.662496	0.0586871	-11.2886	1.49372e-29	3.93482e-28
ENSMUSG00000072621	Slfn10-ps	237887	1357.77	1.13369	0.10048	11.2827	1.59677e-29	4.20029e-28
ENSMUSG00000026390	Marco	17167	56707.4	0.732923	0.0650501	11.2671	1.90825e-29	5.01249e-28
ENSMUSG00000034855	Cxcl10	15945	1149.05	4.05395	0.35981	11.2669	1.91123e-29	5.01318e-28
ENSMUSG00000025758	Plk4	20873	594.825	-1.06376	0.0944533	-11.2622	2.01551e-29	5.27921e-28
ENSMUSG00000068735	Trp53i11	277414	146.005	2.53595	0.225226	11.2596	2.07742e-29	5.43366e-28
ENSMUSG00000045679	Pqlc3	217430	1777.73	-0.763696	0.0679722	-11.2354	2.73202e-29	7.1357e-28
ENSMUSG00000023460	Rab12	19328	3363.73	0.513341	0.0457088	11.2307	2.8828e-29	7.5189e-28
ENSMUSG00000037020	Wdr62	233064	820.846	-1.1156	0.0993523	-11.2287	2.94745e-29	7.67668e-28
ENSMUSG00000002105	Slc39a13	68427	1616.78	0.65042	0.0579638	11.2211	3.21094e-29	8.35116e-28
ENSMUSG00000028884	Rpa2	19891	906.482	-0.887604	0.0791076	-11.2202	3.2452e-29	8.4284e-28
ENSMUSG00000030681	Mvp	78388	9514.14	0.447872	0.039925	11.2178	3.33368e-29	8.64604e-28
ENSMUSG00000004880	Lbr	98386	1943.29	-0.777607	0.0694194	-11.2016	4.00491e-29	1.03723e-27
ENSMUSG00000034329	Brip1	237911	251.996	-1.90582	0.170153	-11.2007	4.04705e-29	1.04668e-27
ENSMUSG00000028175	Depdc1a	76131	84.1269	-3.15945	0.282219	-11.195	4.31243e-29	1.11375e-27
ENSMUSG00000024421	Lama3	16774	859.605	-1.36124	0.121964	-11.1611	6.32362e-29	1.63089e-27
ENSMUSG00000029561	Oasl2	23962	6054.38	3.08087	0.27607	11.1598	6.41596e-29	1.6524e-27
ENSMUSG00000025225	Nfkb2	18034	6625.89	0.745584	0.0668389	11.1549	6.77363e-29	1.74209e-27
ENSMUSG00000093930	Hmgcs1	208715	3330.86	0.656025	0.0588313	11.1509	7.08463e-29	1.81954e-27
ENSMUSG00000039853	Trim14	74735	1557.41	1.00642	0.0902838	11.1473	7.38263e-29	1.89344e-27
ENSMUSG00000016256	Ctsz	64138	93451.6	0.322975	0.0289826	11.1438	7.67952e-29	1.96685e-27
ENSMUSG00000051517	Arhgef39	230098	161.767	-1.83568	0.164759	-11.1415	7.87427e-29	2.01394e-27
ENSMUSG00000032666	1700025G04Rik	69399	631.884	-0.995654	0.0894721	-11.1281	9.15711e-29	2.3388e-27
ENSMUSG00000084350	Znf41-ps	70005	1003.89	0.890131	0.080047	11.1201	1.00148e-28	2.55434e-27
ENSMUSG00000025498	Irf7	54123	3579.95	3.6192	0.325797	11.1087	1.13741e-28	2.89703e-27
ENSMUSG00000049969	Plekhf2	71801	4572.1	0.516625	0.0465697	11.0936	1.3478e-28	3.42816e-27
ENSMUSG00000039396	Neil3	234258	138.304	-3.45499	0.311446	-11.0934	1.35122e-28	3.43214e-27
ENSMUSG00000000058	Cav2	12390	2320.57	-0.721008	0.0650023	-11.092	1.37136e-28	3.47851e-27
ENSMUSG00000027035	Cers6	241447	8043.91	0.639177	0.0576512	11.087	1.4512e-28	3.67596e-27
ENSMUSG00000055612	Cdca7	66953	243.414	-1.63716	0.147761	-11.0798	1.57255e-28	3.9779e-27
ENSMUSG00000024235	Map3k8	26410	1510.02	0.702741	0.0634596	11.0738	1.68037e-28	4.24484e-27
ENSMUSG00000018983	E2f2	242705	177.981	-2.63282	0.237923	-11.0658	1.83756e-28	4.63557e-27
ENSMUSG00000030149	Klrk1	27007	93.8108	3.78168	0.341896	11.0609	1.94061e-28	4.88885e-27
ENSMUSG00000006519	Cyba	13057	26479.1	0.514639	0.0465614	11.0529	2.12211e-28	5.3388e-27
ENSMUSG00000090272	Mndal	100040462	2689.19	2.11158	0.191527	11.0249	2.89722e-28	7.27892e-27
ENSMUSG00000067297	Ifit1bl2	112419	62.6596	4.13343	0.375239	11.0155	3.21873e-28	8.07568e-27
ENSMUSG00000025647	Shisa5	66940	18350.7	0.540497	0.0490928	11.0097	3.43121e-28	8.5971e-27
ENSMUSG00000049881	2810025M15Rik	69953	2058.1	-0.60381	0.0548478	-11.0088	3.46455e-28	8.66889e-27
ENSMUSG00000029098	Acox3	80911	5896.95	-0.557816	0.0507	-11.0023	3.72545e-28	9.30909e-27
ENSMUSG00000070427	Il18bp	16068	534.626	1.08948	0.0990604	10.9982	3.89911e-28	9.72986e-27
ENSMUSG00000037894	H2afz	51788	13685.8	-0.503021	0.0457396	-10.9975	3.92887e-28	9.79088e-27
ENSMUSG00000055485	Soga1	320706	2038.58	-0.832258	0.0757104	-10.9927	4.14546e-28	1.03167e-26
ENSMUSG00000033581	Igf2bp2	319765	716.056	1.10248	0.100452	10.9752	5.03159e-28	1.25051e-26
ENSMUSG00000035929	H2-Q4	15015	482.409	1.35195	0.123335	10.9616	5.84629e-28	1.45104e-26
ENSMUSG00000010307	Tmem86a	67893	10106.3	0.433308	0.0395366	10.9597	5.9711e-28	1.48003e-26
ENSMUSG00000019773	Fbxo5	67141	241.835	-1.38792	0.12667	-10.957	6.15118e-28	1.52262e-26
ENSMUSG00000035392	Dennd1a	227801	3060.83	0.559693	0.0511017	10.9525	6.46181e-28	1.59737e-26
ENSMUSG00000034773	BC030867	217216	83.3637	-2.80648	0.256487	-10.942	7.25692e-28	1.79153e-26
ENSMUSG00000076441	Ass1	11898	1029.79	-0.94309	0.0862037	-10.9403	7.39913e-28	1.8242e-26
ENSMUSG00000081221	Gm14760	654474	6331.5	-0.486379	0.0444701	-10.9372	7.65134e-28	1.88386e-26
ENSMUSG00000028266	Lmo4	16911	1010.93	1.04149	0.0955528	10.8996	1.15758e-27	2.84633e-26
ENSMUSG00000018906	P4ha2	18452	1959.73	-0.668895	0.061415	-10.8914	1.26669e-27	3.10633e-26
ENSMUSG00000006219	Fblim1	74202	3225.8	0.656958	0.0603358	10.8884	1.30962e-27	3.20736e-26
ENSMUSG00000078965	Gm12033	100042746	10231	-0.445383	0.040921	-10.884	1.37419e-27	3.36103e-26
ENSMUSG00000039470	Zdhhc2	70546	587.263	-1.19235	0.109588	-10.8803	1.43167e-27	3.497e-26
ENSMUSG00000078452	Raet1d	56554	189.917	-1.70813	0.157137	-10.8703	1.59624e-27	3.89381e-26
ENSMUSG00000038642	Ctss	13040	82602.8	0.455958	0.0420305	10.8483	2.03274e-27	4.95205e-26
ENSMUSG00000004347	Pde1c	18575	758.985	-1.44938	0.133757	-10.8359	2.32684e-27	5.66107e-26
ENSMUSG00000069049	Eif2s3y	26908	656.56	-0.987326	0.0911447	-10.8325	2.41441e-27	5.86638e-26
ENSMUSG00000029640	Usp12	22217	3425.51	0.478117	0.0441479	10.8299	2.48456e-27	6.0289e-26
ENSMUSG00000045827	Serpinb9	20723	1464.62	0.767979	0.0709367	10.8263	2.58515e-27	6.26475e-26
ENSMUSG00000017670	Elmo2	140579	4700.82	-0.511257	0.0472336	-10.824	2.6496e-27	6.41251e-26
ENSMUSG00000026203	Dnajb2	56812	612.597	1.01914	0.0941701	10.8223	2.69825e-27	6.52171e-26
ENSMUSG00000038301	Snx10	71982	8254.13	0.465169	0.0429834	10.8221	2.70654e-27	6.5332e-26
ENSMUSG00000008393	Carhsp1	52502	3015.51	-0.483189	0.0446544	-10.8206	2.74881e-27	6.62658e-26
ENSMUSG00000048922	Cdca2	108912	276.418	-2.03093	0.187728	-10.8185	2.81292e-27	6.77229e-26
ENSMUSG00000031792	Usb1	101985	1804.51	0.774374	0.0715955	10.816	2.89265e-27	6.95518e-26
ENSMUSG00000026288	Inpp5d	16331	15815	-0.330725	0.0305872	-10.8125	3.00323e-27	7.21166e-26
ENSMUSG00000055447	Cd47	16423	9227.32	0.672811	0.0622514	10.808	3.15587e-27	7.56835e-26
ENSMUSG00000020185	E2f7	52679	78.6563	-3.1713	0.294229	-10.7783	4.35773e-27	1.04371e-25
ENSMUSG00000074063	Osgin1	71839	1764.46	0.776142	0.0720196	10.7768	4.4292e-27	1.05945e-25
ENSMUSG00000021886	Gpr65	14744	5678.29	0.529777	0.049223	10.7628	5.1572e-27	1.23199e-25
ENSMUSG00000004642	Slbp	20492	2719.97	-0.499952	0.0464541	-10.7623	5.18794e-27	1.23773e-25
ENSMUSG00000020464	Pnpt1	71701	1945.07	0.697833	0.0649264	10.7481	6.05196e-27	1.44201e-25
ENSMUSG00000059994	Fcrl1	229499	704.541	1.14968	0.107021	10.7426	6.41998e-27	1.52772e-25
ENSMUSG00000034023	Fancd2	211651	160.868	-2.22189	0.206951	-10.7363	6.87396e-27	1.63365e-25
ENSMUSG00000097979	Gm4691	100043853	437.522	-0.975581	0.090911	-10.7312	7.26822e-27	1.72513e-25
ENSMUSG00000063015	Ccni	12453	8233.08	-0.384981	0.0358815	-10.7292	7.42131e-27	1.7592e-25
ENSMUSG00000052270	Fpr2	14289	956.213	1.10825	0.103301	10.7283	7.4957e-27	1.77456e-25
ENSMUSG00000024732	Ccdc86	108673	2325.39	1.04091	0.0972573	10.7027	9.88733e-27	2.33776e-25
ENSMUSG00000005087	Cd44	12505	8913.77	-0.432531	0.0405028	-10.6791	1.27569e-26	3.01238e-25
ENSMUSG00000013846	St3gal1	20442	597.213	1.07766	0.100937	10.6765	1.31181e-26	3.09372e-25
ENSMUSG00000047945	Marcksl1	17357	22966.7	0.782625	0.0733971	10.6629	1.51804e-26	3.57552e-25
ENSMUSG00000030091	Nup210	54563	393.256	-1.64761	0.154717	-10.6492	1.75886e-26	4.13746e-25
ENSMUSG00000024299	Adamts10	224697	1102.11	-0.934577	0.0878157	-10.6425	1.8904e-26	4.44124e-25
ENSMUSG00000026103	Gls	14660	4485.01	-0.588262	0.0553125	-10.6353	2.04276e-26	4.7931e-25
ENSMUSG00000029687	Ezh2	14056	373.672	-1.46403	0.137673	-10.6342	2.06672e-26	4.84316e-25
ENSMUSG00000039959	Hip1	215114	6759.55	-0.672294	0.0632928	-10.622	2.35551e-26	5.51291e-25
ENSMUSG00000032397	Tipin	66131	707	-0.852943	0.0803498	-10.6154	2.52782e-26	5.90464e-25
ENSMUSG00000039031	Arhgap18	73910	3859.75	-0.66748	0.0628789	-10.6153	2.52928e-26	5.90464e-25
ENSMUSG00000037613	Tnfrsf23	79201	913.546	-1.03699	0.0977699	-10.6064	2.78123e-26	6.48463e-25
ENSMUSG00000015854	Cd5l	11801	1948.73	0.94865	0.0895183	10.5973	3.06763e-26	7.14337e-25
ENSMUSG00000036180	Gatad2a	234366	5537.32	0.458046	0.0432922	10.5804	3.67572e-26	8.5486e-25
ENSMUSG00000039304	Tnfsf10	22035	278.809	4.10878	0.388378	10.5793	3.71625e-26	8.62489e-25
ENSMUSG00000079168	Cd209g	70192	121.524	6.69714	0.633043	10.5793	3.71787e-26	8.62489e-25
ENSMUSG00000033355	Rtp4	67775	3496.11	3.09204	0.292674	10.5648	4.33974e-26	1.00549e-24
ENSMUSG00000020641	Rsad2	58185	10598.1	4.71703	0.446616	10.5617	4.48355e-26	1.03751e-24
ENSMUSG00000046982	Tshz1	110796	1166.67	0.720486	0.0682408	10.558	4.66571e-26	1.07831e-24
ENSMUSG00000004285	Atp6v1f	66144	8801.7	0.432761	0.041001	10.5549	4.82195e-26	1.11303e-24
ENSMUSG00000072889	Nfxl1	100978	2992.12	0.873811	0.0828131	10.5516	4.99394e-26	1.15129e-24
ENSMUSG00000019872	Smpdl3a	57319	7708.4	-0.452424	0.0429178	-10.5416	5.55183e-26	1.27831e-24
ENSMUSG00000041827	Oasl1	231655	310.798	4.61788	0.438215	10.538	5.77422e-26	1.32785e-24
ENSMUSG00000001123	Lgals9	16859	11578	1.23315	0.117023	10.5377	5.79094e-26	1.33004e-24
ENSMUSG00000037594	Clba1	217887	885.63	0.86935	0.082547	10.5316	6.17911e-26	1.41743e-24
ENSMUSG00000034707	Gns	75612	39841.6	0.38732	0.0368274	10.5172	7.20109e-26	1.64982e-24
ENSMUSG00000070605	Zfp992	433791	1008.97	0.743622	0.0707149	10.5158	7.30766e-26	1.67216e-24
ENSMUSG00000001918	Slc1a5	20514	706.19	-0.93556	0.0890053	-10.5113	7.66391e-26	1.75151e-24
ENSMUSG00000032175	Tyk2	54721	6000.16	0.543823	0.0517707	10.5045	8.23943e-26	1.88071e-24
ENSMUSG00000022346	Myc	17869	906.161	-0.722388	0.0688633	-10.4902	9.5861e-26	2.18539e-24
ENSMUSG00000022255	Mtdh	67154	4612.28	0.567953	0.0541486	10.4888	9.72646e-26	2.21466e-24
ENSMUSG00000023919	Cenpq	83815	145.794	-1.75069	0.166977	-10.4846	1.01652e-25	2.31172e-24
ENSMUSG00000070738	Dgkd	227333	9009.05	-0.373701	0.0356463	-10.4836	1.02762e-25	2.33408e-24
ENSMUSG00000078636	Gm7336	654473	6499.77	-0.458979	0.0437912	-10.4811	1.05539e-25	2.3942e-24
ENSMUSG00000031788	Kifc3	16582	1023.31	-0.842929	0.0804264	-10.4808	1.05893e-25	2.39929e-24
ENSMUSG00000095937	Gm12671	654475	6466.95	-0.46055	0.0439711	-10.4739	1.13805e-25	2.5754e-24
ENSMUSG00000052566	Hook2	170833	1599.93	0.734363	0.0701177	10.4733	1.1459e-25	2.58998e-24
ENSMUSG00000027313	Chac1	69065	157.055	2.3268	0.222232	10.4701	1.18492e-25	2.67491e-24
ENSMUSG00000027399	Il1a	16175	2133.33	1.0779	0.103019	10.4631	1.276e-25	2.877e-24
ENSMUSG00000040435	Ppp1r15a	17872	2983.43	0.56402	0.053934	10.4576	1.35222e-25	3.04513e-24
ENSMUSG00000024381	Bin1	30948	6803.34	-0.458611	0.0439179	-10.4425	1.58642e-25	3.5682e-24
ENSMUSG00000056124	B4galt6	56386	6869.23	0.427173	0.0409274	10.4373	1.67428e-25	3.76123e-24
ENSMUSG00000024989	Cep55	74107	311.077	-2.09696	0.201349	-10.4146	2.12773e-25	4.77408e-24
ENSMUSG00000038178	Slc43a2	215113	19331	0.485684	0.0466615	10.4087	2.26345e-25	5.07244e-24
ENSMUSG00000032508	Myd88	17874	2870.45	0.802045	0.0772213	10.3863	2.86172e-25	6.4054e-24
ENSMUSG00000019214	Chtf18	214901	217.903	-1.69851	0.163537	-10.3861	2.86836e-25	6.41248e-24
ENSMUSG00000037572	Wdhd1	218973	685.545	-1.24678	0.120186	-10.3737	3.26493e-25	7.29023e-24
ENSMUSG00000011752	Pgam1	18648	33738.7	-0.326196	0.0314501	-10.3719	3.32994e-25	7.42641e-24
ENSMUSG00000020868	Xylt2	217119	8015.25	0.584312	0.0563737	10.365	3.57883e-25	7.97185e-24
ENSMUSG00000045730	Adrb2	11555	1124.24	-0.710444	0.0686101	-10.3548	3.98018e-25	8.85518e-24
ENSMUSG00000028525	Pde4b	18578	4270.89	0.672852	0.0649897	10.3532	4.04711e-25	8.99326e-24
ENSMUSG00000020225	Tmbim4	68212	4344.81	0.42966	0.0415043	10.3522	4.09081e-25	9.07945e-24
ENSMUSG00000045410	Akr1e1	56043	652.89	0.938705	0.0906797	10.3519	4.10353e-25	9.09674e-24
ENSMUSG00000046223	Plaur	18793	2088.23	-0.782597	0.0756012	-10.3517	4.11321e-25	9.10727e-24
ENSMUSG00000070873	Lilra5	232801	377.235	-1.03604	0.100181	-10.3416	4.56718e-25	1.01003e-23
ENSMUSG00000071369	Map3k5	26408	947.741	-0.898187	0.0868597	-10.3407	4.61319e-25	1.01899e-23
ENSMUSG00000039456	Morc3	338467	7550.44	0.533407	0.0515942	10.3385	4.719e-25	1.04111e-23
ENSMUSG00000030659	Nucb2	53322	1814.88	-0.621898	0.060158	-10.3377	4.75641e-25	1.04811e-23
ENSMUSG00000046295	Ankle1	234396	99.5148	-2.83041	0.273814	-10.337	4.79484e-25	1.05532e-23
ENSMUSG00000000275	Trim25	217069	7156.67	0.769394	0.0744451	10.335	4.89203e-25	1.07543e-23
ENSMUSG00000015889	Lta4h	16993	2718.71	-0.598859	0.0579594	-10.3324	5.02902e-25	1.10423e-23
ENSMUSG00000039725	Trp53rka	381406	947.385	0.766413	0.0742383	10.3237	5.50706e-25	1.20776e-23
ENSMUSG00000036353	P2ry12	70839	1301.72	-0.944572	0.0915992	-10.312	6.21848e-25	1.36216e-23
ENSMUSG00000022265	Ank	11732	2491.42	-0.519474	0.0504354	-10.2998	7.06218e-25	1.54515e-23
ENSMUSG00000028494	Plin2	11520	40708.3	-0.348181	0.0338322	-10.2914	7.70367e-25	1.6835e-23
ENSMUSG00000032783	Troap	78733	89.7317	-2.46082	0.239221	-10.2868	8.08025e-25	1.76371e-23
ENSMUSG00000006782	Cnp	12799	4069.86	0.719798	0.0700209	10.2798	8.69517e-25	1.89569e-23
ENSMUSG00000026615	Eprs	107508	7011.03	0.391113	0.0380669	10.2744	9.19567e-25	2.00244e-23
ENSMUSG00000059108	Ifitm6	213002	323.469	-1.46552	0.142777	-10.2644	1.01942e-24	2.21727e-23
ENSMUSG00000036944	Tmem71	213068	559.298	-1.14365	0.111527	-10.2545	1.12959e-24	2.45401e-23
ENSMUSG00000026773	Pfkfb3	170768	2277.17	0.694788	0.0677946	10.2484	1.20278e-24	2.60994e-23
ENSMUSG00000022102	Dok2	13449	1719.31	-0.787812	0.0768969	-10.245	1.24565e-24	2.69979e-23
ENSMUSG00000025025	Mxi1	17859	2139.95	-0.853058	0.0832815	-10.2431	1.27134e-24	2.75224e-23
ENSMUSG00000036402	Gng12	14701	12014.1	0.451314	0.0440694	10.241	1.29934e-24	2.80955e-23
ENSMUSG00000044350	Lacc1	210808	3803.74	0.812405	0.0794093	10.2306	1.44617e-24	3.12338e-23
ENSMUSG00000039997	Ifi203	15950	3014.95	2.15447	0.210756	10.2226	1.57136e-24	3.38981e-23
ENSMUSG00000068328	Aup1	11993	5301.28	0.416645	0.0407973	10.2126	1.742e-24	3.75354e-23
ENSMUSG00000019951	Uhrf1bp1l	75089	6411.84	-0.475251	0.0465734	-10.2044	1.89583e-24	4.08023e-23
ENSMUSG00000018593	Sparc	20692	665.409	-1.22695	0.120295	-10.1996	1.99189e-24	4.28198e-23
ENSMUSG00000038866	Zcchc2	227449	2529.23	0.670559	0.0657465	10.1992	2.00002e-24	4.29446e-23
ENSMUSG00000062866	Phactr2	215789	1636.68	-0.612518	0.0600959	-10.1923	2.14535e-24	4.60116e-23
ENSMUSG00000021701	Plk2	20620	11499.5	0.378703	0.0371748	10.1871	2.26392e-24	4.84982e-23
ENSMUSG00000027660	Skil	20482	6190.46	0.503793	0.0494563	10.1866	2.27533e-24	4.86862e-23
ENSMUSG00000027087	Itgav	16410	18505.2	-0.490855	0.0481996	-10.1838	2.34245e-24	5.00644e-23
ENSMUSG00000096617	Gm5559	433921	7806.57	-0.454975	0.0446784	-10.1833	2.35382e-24	5.02492e-23
ENSMUSG00000029401	Rilpl2	80291	2990.2	0.471142	0.0462792	10.1804	2.42494e-24	5.17079e-23
ENSMUSG00000014599	Csf1	12977	1148.94	1.16704	0.114733	10.1718	2.65015e-24	5.63799e-23
ENSMUSG00000026222	Sp100	20684	5079.67	1.66448	0.163687	10.1687	2.73675e-24	5.81551e-23
ENSMUSG00000000386	Mx1	17857	1442.86	4.42118	0.435292	10.1568	3.08972e-24	6.55801e-23
ENSMUSG00000004069	Dnaja3	83945	3713.23	0.470783	0.0464358	10.1384	3.73325e-24	7.91484e-23
ENSMUSG00000004846	Plod3	26433	4964.63	0.472431	0.046613	10.1352	3.85671e-24	8.16721e-23
ENSMUSG00000023947	Nfkbie	18037	3125.83	0.86706	0.0855533	10.1347	3.87417e-24	8.19478e-23
ENSMUSG00000031391	L1cam	16728	137.674	-2.28904	0.226074	-10.1252	4.27184e-24	9.02561e-23
ENSMUSG00000039748	Exo1	26909	149.016	-2.19138	0.216553	-10.1193	4.53422e-24	9.56902e-23
ENSMUSG00000020476	Dbnl	13169	7318.54	0.569665	0.0563121	10.1162	4.68167e-24	9.86891e-23
ENSMUSG00000070730	Rmdn3	67809	1333.54	0.851253	0.0841509	10.1158	4.70195e-24	9.90037e-23
ENSMUSG00000031756	Cenpn	72155	144.186	-1.84852	0.182789	-10.1129	4.84239e-24	1.01845e-22
ENSMUSG00000045594	Glb1	12091	6182.53	-0.436728	0.0431915	-10.1114	4.91653e-24	1.03286e-22
ENSMUSG00000007613	Tgfbr1	21812	21913	0.600077	0.0594301	10.0972	5.68449e-24	1.19284e-22
ENSMUSG00000026088	Mitd1	69028	578.988	1.18644	0.117515	10.0961	5.74565e-24	1.2043e-22
ENSMUSG00000056498	Tmem154	320782	335.883	-1.39103	0.137888	-10.0881	6.23593e-24	1.30559e-22
ENSMUSG00000066151	Fkbp15	338355	7490.07	0.322141	0.0319456	10.084	6.49932e-24	1.35919e-22
ENSMUSG00000004099	Dnmt1	13433	4193.05	-0.555505	0.0550978	-10.0822	6.62551e-24	1.38401e-22
ENSMUSG00000037466	Tedc1	104732	296.537	-1.62521	0.161357	-10.0721	7.33611e-24	1.53072e-22
ENSMUSG00000031740	Mmp2	17390	438.468	-1.1263	0.111824	-10.072	7.34638e-24	1.53113e-22
ENSMUSG00000074151	Nlrc5	434341	2300.21	1.6273	0.161614	10.0691	7.56822e-24	1.57559e-22
ENSMUSG00000010453	Kansl3	226976	2647.78	0.519844	0.0516467	10.0654	7.85701e-24	1.63387e-22
ENSMUSG00000027115	Kif18a	228421	119.565	-2.2818	0.226911	-10.0559	8.65074e-24	1.7969e-22
ENSMUSG00000049932	H2afx	15270	727.948	-0.902657	0.0897683	-10.0554	8.69624e-24	1.80432e-22
ENSMUSG00000021556	Golm1	105348	3363.4	-0.606482	0.06033	-10.0527	8.93455e-24	1.85169e-22
ENSMUSG00000034459	Ifit1	15957	3825.19	4.53202	0.450873	10.0517	9.03393e-24	1.87018e-22
ENSMUSG00000069939	Gm12070	654472	3818.36	-0.487259	0.0485099	-10.0445	9.71164e-24	2.00823e-22
ENSMUSG00000004085	Map3k20	65964	1314.35	-0.910435	0.0907553	-10.0318	1.10527e-23	2.28299e-22
ENSMUSG00000024437	Gm8615	667410	1563.1	-0.654849	0.0652851	-10.0306	1.11823e-23	2.30717e-22
ENSMUSG00000052142	Rasal3	320484	3117.53	-0.547469	0.0545898	-10.0288	1.13907e-23	2.34755e-22
ENSMUSG00000058258	Idi1	319554	992.936	0.799768	0.0797908	10.0233	1.20415e-23	2.47892e-22
ENSMUSG00000020598	Nrcam	319504	2734.14	-0.692997	0.0691703	-10.0187	1.26144e-23	2.59396e-22
ENSMUSG00000018143	Mafk	17135	2331.56	0.760843	0.075953	10.0173	1.27973e-23	2.62864e-22
ENSMUSG00000031672	Got2	14719	4225.6	-0.407338	0.0406701	-10.0157	1.30086e-23	2.66907e-22
ENSMUSG00000050737	Ptges	64292	953.225	1.09873	0.109741	10.012	1.34991e-23	2.76664e-22
ENSMUSG00000038352	Arl5c	217151	1752.72	0.639816	0.0639447	10.0058	1.43776e-23	2.94343e-22
ENSMUSG00000037820	Tgm2	21817	2575.46	-0.77537	0.0775274	-10.0012	1.50504e-23	3.07775e-22
ENSMUSG00000021697	Depdc1b	218581	55.3365	-3.48151	0.348281	-9.99627	1.58245e-23	3.23246e-22
ENSMUSG00000046768	Rhoj	80837	226.592	-1.70074	0.170252	-9.98952	1.69392e-23	3.45635e-22
ENSMUSG00000045273	Cenph	26886	98.7015	-2.2999	0.230236	-9.98928	1.69811e-23	3.46106e-22
ENSMUSG00000084279	Gm13232	666351	319.731	-1.30298	0.130858	-9.95722	2.34527e-23	4.77484e-22
ENSMUSG00000026456	Cyb5r1	72017	5957.98	0.416901	0.0418803	9.95459	2.4082e-23	4.89217e-22
ENSMUSG00000042644	Itpr3	16440	1841.84	-0.740205	0.0743582	-9.95459	2.4082e-23	4.89217e-22
ENSMUSG00000036534	Slc38a7	234595	3524.07	0.524332	0.0527033	9.94875	2.55382e-23	5.18228e-22
ENSMUSG00000035164	Zc3h12c	244871	1128.01	0.978463	0.0983803	9.94572	2.63261e-23	5.33631e-22
ENSMUSG00000021175	Cdca7l	217946	541.117	-0.920857	0.0926002	-9.94444	2.66675e-23	5.39958e-22
ENSMUSG00000027944	Hax1	23897	3066.04	0.459206	0.0461925	9.94114	2.75653e-23	5.57525e-22
ENSMUSG00000031504	Rab20	19332	3609.84	0.651974	0.0656642	9.92891	3.11648e-23	6.29638e-22
ENSMUSG00000026672	Optn	71648	1400.64	0.648809	0.0653854	9.92284	3.31198e-23	6.68404e-22
ENSMUSG00000031613	Hpgd	15446	6804.45	-1.72008	0.173363	-9.92187	3.34419e-23	6.74167e-22
ENSMUSG00000071311	Gpr31b	436440	370.995	1.35217	0.136285	9.92161	3.35299e-23	6.75205e-22
ENSMUSG00000047534	Mis18bp1	217653	420.451	-1.34953	0.136054	-9.9191	3.43831e-23	6.91632e-22
ENSMUSG00000039187	Fanci	208836	174.868	-2.29837	0.231865	-9.91254	3.67208e-23	7.37852e-22
ENSMUSG00000032841	Prr5l	72446	732.538	1.14685	0.115739	9.90896	3.80596e-23	7.63923e-22
ENSMUSG00000070713	Gm10282	100042405	1158.68	-0.61339	0.0620226	-9.88977	4.61089e-23	9.2448e-22
ENSMUSG00000057666	Gapdh	14433	57196.5	-0.384102	0.0388818	-9.87871	5.14919e-23	1.03129e-21
ENSMUSG00000035024	Ncapd3	78658	877.517	-1.08568	0.109916	-9.87735	5.21931e-23	1.0442e-21
ENSMUSG00000004151	Etv1	14009	1909.53	-0.61003	0.0617673	-9.87626	5.27669e-23	1.05454e-21
ENSMUSG00000002602	Axl	26362	15959.5	0.51762	0.052436	9.87146	5.53553e-23	1.10507e-21
ENSMUSG00000023456	Tpi1	21991	22128.4	-0.412136	0.0417683	-9.8672	5.77555e-23	1.15174e-21
ENSMUSG00000073406	H2-Bl	14963	199.277	1.45597	0.147654	9.86068	6.16298e-23	1.22768e-21
ENSMUSG00000031016	Wee1	22390	539.14	-0.860962	0.087352	-9.85624	6.44135e-23	1.28175e-21
ENSMUSG00000037999	Arap2	212285	3246.43	-0.497501	0.0504868	-9.85409	6.58128e-23	1.30818e-21
ENSMUSG00000030142	Clec4e	56619	14627.1	0.767185	0.0778656	9.85268	6.6742e-23	1.32522e-21
ENSMUSG00000001741	Il16	16170	1176.88	-0.654318	0.0664228	-9.85081	6.79949e-23	1.34865e-21
ENSMUSG00000081671	Gm13167	666474	316.208	-1.31453	0.133538	-9.84387	7.28531e-23	1.44346e-21
ENSMUSG00000037849	Ifi206	102639543	876.948	4.89063	0.497157	9.83719	7.78586e-23	1.54098e-21
ENSMUSG00000042659	Arrdc4	66412	4193.29	0.623362	0.0634003	9.83217	8.18381e-23	1.61801e-21
ENSMUSG00000025950	Idh1	15926	10890	-0.582311	0.0592261	-9.832	8.19771e-23	1.61903e-21
ENSMUSG00000040710	St8sia4	20452	6876.36	-0.620096	0.0631408	-9.82086	9.15631e-23	1.80642e-21
ENSMUSG00000024140	Epas1	13819	3271.27	-0.803414	0.0818758	-9.8126	9.93749e-23	1.95844e-21
ENSMUSG00000027341	Tmem230	70612	2483.18	0.469079	0.0478317	9.80687	1.0518e-22	2.07064e-21
ENSMUSG00000029501	Ankle2	71782	4850.11	0.647122	0.0660419	9.79866	1.14089e-22	2.24364e-21
ENSMUSG00000027199	Gatm	67092	33701.5	0.444008	0.0453446	9.79186	1.22026e-22	2.39715e-21
ENSMUSG00000018986	Slfn3	20557	347.334	1.6678	0.170403	9.78737	1.27571e-22	2.50343e-21
ENSMUSG00000026315	Serpinb8	20725	2613.22	-0.679415	0.0694328	-9.78522	1.30311e-22	2.55447e-21
ENSMUSG00000028019	Pdgfc	54635	738.613	0.918919	0.0940178	9.77388	1.45765e-22	2.8544e-21
ENSMUSG00000071350	Setdb2	239122	701.016	0.801035	0.082008	9.76777	1.54824e-22	3.02859e-21
ENSMUSG00000029385	Ccng2	12452	3678.22	-0.646331	0.066173	-9.76729	1.55564e-22	3.03984e-21
ENSMUSG00000022533	Atp13a3	224088	5148.9	-0.594334	0.0608562	-9.7662	1.57238e-22	3.0693e-21
ENSMUSG00000029570	Lfng	16848	5418.51	0.555909	0.0569529	9.76085	1.65766e-22	3.23235e-21
ENSMUSG00000039055	Eme1	268465	92.6596	-2.1962	0.225213	-9.75164	1.81505e-22	3.53551e-21
ENSMUSG00000056268	Dennd1b	329260	2096.39	0.795187	0.0815503	9.75087	1.82888e-22	3.55871e-21
ENSMUSG00000042742	Bmt2	101148	3399.02	0.510279	0.0523573	9.74609	1.91711e-22	3.72647e-21
ENSMUSG00000027347	Rasgrp1	19419	114.593	2.87676	0.295241	9.74377	1.96134e-22	3.80842e-21
ENSMUSG00000069309	Hist1h2an	319170	96.8186	-2.25238	0.231356	-9.73554	2.1268e-22	4.12537e-21
ENSMUSG00000096802	Gm15433	100503433	115.749	3.02947	0.311381	9.72913	2.26515e-22	4.38911e-21
ENSMUSG00000070031	Sp140	434484	898.105	0.968901	0.0996142	9.72653	2.32374e-22	4.49792e-21
ENSMUSG00000002983	Relb	19698	4178.47	0.612009	0.0629797	9.71755	2.53805e-22	4.90702e-21
ENSMUSG00000024835	Coro1b	23789	17642.7	0.322367	0.033174	9.71746	2.5404e-22	4.90702e-21
ENSMUSG00000021039	Snw1	66354	2885.68	0.456502	0.04702	9.70868	2.76897e-22	5.34292e-21
ENSMUSG00000046245	Pilra	231805	2688.36	-0.626085	0.0645042	-9.70611	2.83975e-22	5.47378e-21
ENSMUSG00000021585	Cast	12380	3262.1	-0.542661	0.0559099	-9.706	2.84274e-22	5.47383e-21
ENSMUSG00000033487	Fndc3a	319448	6736.98	0.646209	0.0666392	9.69712	3.10119e-22	5.95905e-21
ENSMUSG00000031770	Herpud1	64209	2951	0.530429	0.0547661	9.68535	3.48009e-22	6.68018e-21
ENSMUSG00000020589	Fam49a	76820	1301.15	0.843201	0.0871579	9.67441	3.87305e-22	7.42676e-21
ENSMUSG00000033066	Gas7	14457	6965.53	0.570433	0.0589743	9.67257	3.94335e-22	7.55373e-21
ENSMUSG00000040713	Creg1	433375	72610.8	0.40795	0.0421878	9.66986	4.04927e-22	7.74858e-21
ENSMUSG00000004707	Ly9	17085	3798.05	0.427682	0.0442659	9.66164	4.38774e-22	8.38759e-21
ENSMUSG00000026003	Acadl	11363	3552.55	-0.431149	0.0446705	-9.65177	4.83132e-22	9.22598e-21
ENSMUSG00000039146	Ifi44l	15061	221.364	2.32655	0.241136	9.64831	4.99702e-22	9.53254e-21
ENSMUSG00000020097	Sgpl1	20397	48195.9	0.33054	0.0342622	9.64737	5.04345e-22	9.61117e-21
ENSMUSG00000022305	Lrp12	239393	6532.12	0.562839	0.0583839	9.6403	5.40317e-22	1.02861e-20
ENSMUSG00000006445	Epha2	13836	68.7615	-2.96598	0.307697	-9.63928	5.45695e-22	1.03671e-20
ENSMUSG00000036894	Rap2b	74012	1858.63	0.540989	0.0561228	9.63938	5.45147e-22	1.03671e-20
ENSMUSG00000024457	Trim26	22670	3210.14	0.557018	0.0578827	9.62323	6.37942e-22	1.21071e-20
ENSMUSG00000028811	Yars	107271	2357.42	0.521586	0.0542443	9.61551	6.87668e-22	1.30374e-20
ENSMUSG00000096472	Cdkn2d	12581	556.336	-0.819507	0.0853318	-9.60377	7.70727e-22	1.45972e-20
ENSMUSG00000042901	Aida	108909	1472.74	0.750372	0.0781702	9.59922	8.05551e-22	1.52411e-20
ENSMUSG00000022587	Ly6e	17069	9629.09	1.75302	0.182641	9.59816	8.13842e-22	1.53822e-20
ENSMUSG00000028614	Ndc1	72787	1762.53	-0.597348	0.06224	-9.5975	8.19067e-22	1.54651e-20
ENSMUSG00000042349	Ikbke	56489	9384.71	0.500454	0.0521467	9.59706	8.22595e-22	1.55159e-20
ENSMUSG00000038780	Smurf1	75788	3391.46	0.449067	0.0468065	9.59412	8.46401e-22	1.59486e-20
ENSMUSG00000074656	Eif2s2	67204	3594.87	0.477527	0.0497986	9.58917	8.87948e-22	1.67144e-20
ENSMUSG00000021185	Dglucy	217830	1652.88	-0.582392	0.0607458	-9.58737	9.03546e-22	1.69734e-20
ENSMUSG00000023010	Tmbim6	110213	26721.6	0.395085	0.0412086	9.58742	9.03111e-22	1.69734e-20
ENSMUSG00000009575	Cbx5	12419	1713.34	-0.812588	0.0848822	-9.57313	1.03719e-21	1.94443e-20
ENSMUSG00000030595	Nfkbib	18036	1633.84	0.743163	0.0776296	9.57319	1.03661e-21	1.94443e-20
ENSMUSG00000028538	St3gal3	20441	1261.19	0.733437	0.0766296	9.5712	1.05672e-21	1.97906e-20
ENSMUSG00000043323	Fbrsl1	381668	1121.15	0.969021	0.101299	9.56591	1.11219e-21	2.08083e-20
ENSMUSG00000029761	Cald1	109624	256.05	-1.29091	0.13498	-9.56373	1.13589e-21	2.12302e-20
ENSMUSG00000028238	Atp6v0d2	242341	3318.82	0.737336	0.0771542	9.55665	1.21625e-21	2.2709e-20
ENSMUSG00000041879	Ipo9	226432	6560.2	-0.368653	0.0386077	-9.54868	1.31354e-21	2.45009e-20
ENSMUSG00000039910	Cited2	17684	3173.37	0.633852	0.0664067	9.54499	1.36115e-21	2.53633e-20
ENSMUSG00000015950	Ncf1	17969	16348.1	0.410932	0.0430781	9.53921	1.43918e-21	2.67901e-20
ENSMUSG00000020638	Cmpk2	22169	5686.61	4.36491	0.457597	9.53877	1.44539e-21	2.68691e-20
ENSMUSG00000021703	Serinc5	218442	1655.21	-0.648982	0.0680367	-9.5387	1.44633e-21	2.68691e-20
ENSMUSG00000035678	Tnfsf9	21950	1008.57	-0.946378	0.0992991	-9.53058	1.56411e-21	2.90279e-20
ENSMUSG00000031712	Il15	16168	815.179	0.977366	0.102683	9.51829	1.76049e-21	3.26398e-20
ENSMUSG00000023021	Cers5	71949	2163.39	-0.550473	0.0578602	-9.51384	1.83759e-21	3.40009e-20
ENSMUSG00000024601	Isoc1	66307	3720.73	0.609153	0.0640278	9.51388	1.83672e-21	3.40009e-20
ENSMUSG00000028691	Prdx1	18477	228047	0.335294	0.0352549	9.51057	1.89623e-21	3.50508e-20
ENSMUSG00000019961	Tmpo	21917	3898.42	-0.685399	0.0721035	-9.50577	1.9858e-21	3.66698e-20
ENSMUSG00000023274	Cd4	12504	856.467	0.955276	0.100563	9.49928	2.11341e-21	3.89872e-20
ENSMUSG00000002799	Jag2	16450	119.003	-2.05314	0.216293	-9.49241	2.25762e-21	4.1606e-20
ENSMUSG00000000078	Klf6	23849	16279.8	0.297133	0.0313286	9.4844	2.43776e-21	4.48811e-20
ENSMUSG00000062585	Cnr2	12802	1168.71	-0.89847	0.0947708	-9.48046	2.53175e-21	4.65651e-20
ENSMUSG00000030657	Xylt1	233781	676.019	-1.12008	0.118184	-9.47743	2.60614e-21	4.78855e-20
ENSMUSG00000020034	Tcp11l2	216198	2749.31	-0.938225	0.0990043	-9.4766	2.627e-21	4.82209e-20
ENSMUSG00000044201	Cdc25c	12532	85.2283	-2.45788	0.259596	-9.46811	2.84947e-21	5.22525e-20
ENSMUSG00000022965	Ifngr2	15980	13363.4	0.37189	0.0392871	9.46595	2.90893e-21	5.32899e-20
ENSMUSG00000023045	Soat2	223920	90.2321	2.39708	0.253361	9.46114	3.04612e-21	5.57478e-20
ENSMUSG00000045092	S1pr1	13609	14624.7	-0.561695	0.0593905	-9.45765	3.14928e-21	5.75219e-20
ENSMUSG00000050912	Tmem123	71929	9608.26	0.450718	0.0476759	9.45377	3.26835e-21	5.96377e-20
ENSMUSG00000050914	Ankrd37	654824	195.279	-1.6104	0.170376	-9.45203	3.3231e-21	6.05769e-20
ENSMUSG00000003382	Etv3	27049	4634.23	0.378052	0.0400142	9.44793	3.45585e-21	6.29346e-20
ENSMUSG00000032113	Chek1	12649	125.551	-1.94582	0.205971	-9.44707	3.4844e-21	6.3392e-20
ENSMUSG00000029605	Oas1b	23961	183.689	2.51327	0.266758	9.42153	4.44544e-21	8.07968e-20
ENSMUSG00000054364	Rhob	11852	3106.22	-0.587866	0.0624044	-9.42026	4.49973e-21	8.17031e-20
ENSMUSG00000070737	Tmem35b	100039968	929.625	0.725926	0.0770894	9.41668	4.65569e-21	8.44518e-20
ENSMUSG00000006463	Zdhhc24	70605	883.195	0.67315	0.0714902	9.41598	4.6871e-21	8.49381e-20
ENSMUSG00000027882	Stxbp3	20912	3071.51	0.490899	0.0521641	9.41067	4.92978e-21	8.92484e-20
ENSMUSG00000032812	Arap1	69710	18097	0.302799	0.0321958	9.40492	5.20694e-21	9.41737e-20
ENSMUSG00000029475	Kdm2b	30841	2217.81	-0.488494	0.0519695	-9.39964	5.47517e-21	9.89281e-20
ENSMUSG00000022106	Rcbtb2	105670	7282.36	-0.681553	0.0725186	-9.39832	5.54431e-21	1.00079e-19
ENSMUSG00000023908	Pkmyt1	268930	177.216	-1.84786	0.196666	-9.39596	5.67008e-21	1.0225e-19
ENSMUSG00000024190	Dusp1	19252	821.83	-0.857651	0.0913092	-9.39281	5.84179e-21	1.05243e-19
ENSMUSG00000000290	Itgb2	16414	34314.8	-0.251578	0.0267847	-9.3926	5.85365e-21	1.05354e-19
ENSMUSG00000028184	Adgrl2	99633	3698.91	0.483715	0.0515164	9.38955	6.02561e-21	1.08344e-19
ENSMUSG00000061533	Cep128	75216	674.369	-0.96557	0.102933	-9.38054	6.56374e-21	1.17905e-19
ENSMUSG00000037628	Cdkn3	72391	111.245	-2.054	0.219142	-9.37295	7.05331e-21	1.26576e-19
ENSMUSG00000036667	Tcaf1	77574	767.607	-0.841489	0.089791	-9.37164	7.14146e-21	1.28033e-19
ENSMUSG00000020432	Tcn2	21452	12251.7	-0.373381	0.0398659	-9.36593	7.53824e-21	1.35016e-19
ENSMUSG00000024691	Fam111a	107373	3977.35	-0.485106	0.051808	-9.36353	7.71176e-21	1.3799e-19
ENSMUSG00000000594	Gm2a	14667	8470.87	-0.386589	0.0412917	-9.36239	7.79517e-21	1.39347e-19
ENSMUSG00000040451	Sgms1	208449	3787.87	-0.451849	0.048263	-9.36222	7.80793e-21	1.3944e-19
ENSMUSG00000030096	Slc6a6	21366	34866	0.368149	0.0393446	9.35703	8.20068e-21	1.46313e-19
ENSMUSG00000025790	Slco3a1	108116	227.521	1.79174	0.19154	9.3544	8.40759e-21	1.4986e-19
ENSMUSG00000022971	Ifnar2	15976	5662.13	0.388344	0.0415376	9.34922	8.82965e-21	1.57231e-19
ENSMUSG00000020709	Adap2	216991	4324.72	0.425282	0.0454926	9.34838	8.90028e-21	1.58336e-19
ENSMUSG00000072980	Oip5	70645	89	-2.28718	0.244788	-9.34348	9.32169e-21	1.65673e-19
ENSMUSG00000005611	Mrvi1	17540	69.8899	-3.6249	0.388134	-9.33929	9.69834e-21	1.72201e-19
ENSMUSG00000003308	Keap1	50868	2312.28	0.470189	0.0503657	9.3355	1.00517e-20	1.78305e-19
ENSMUSG00000034445	Cyb561a3	225912	1878.26	0.472001	0.0506002	9.32805	1.07834e-20	1.911e-19
ENSMUSG00000051413	Plagl2	54711	3711.88	0.540858	0.0579896	9.32682	1.0909e-20	1.93141e-19
ENSMUSG00000020437	Myo1g	246177	3126.67	-0.428245	0.045926	-9.32466	1.11339e-20	1.96934e-19
ENSMUSG00000038843	Gcnt1	14537	7636.78	-0.667367	0.0716275	-9.31719	1.19463e-20	2.11101e-19
ENSMUSG00000048234	Rnf149	67702	11851	0.416686	0.0447338	9.3148	1.22182e-20	2.157e-19
ENSMUSG00000027811	4930579G24Rik	75939	254.02	-1.26476	0.135821	-9.31195	1.25506e-20	2.21356e-19
ENSMUSG00000022978	Mis18a	66578	604.615	-0.805168	0.0864883	-9.30955	1.28372e-20	2.26195e-19
ENSMUSG00000038459	Abhd17c	70178	4727.5	0.402527	0.0432402	9.30908	1.28939e-20	2.26977e-19
ENSMUSG00000056724	Nbeal2	235627	2236.13	-0.716719	0.0770205	-9.30555	1.33297e-20	2.34425e-19
ENSMUSG00000032280	Tle3	21887	1040.06	-0.783662	0.0843314	-9.29265	1.50496e-20	2.6442e-19
ENSMUSG00000022967	Ifnar1	15975	13050.1	0.394319	0.0424351	9.29228	1.51013e-20	2.65076e-19
ENSMUSG00000041707	Tmem273	69069	2053.55	-0.569077	0.0612454	-9.29176	1.51763e-20	2.66141e-19
ENSMUSG00000028692	Akr1a1	58810	62854.9	0.288613	0.0310699	9.28916	1.55505e-20	2.72443e-19
ENSMUSG00000022391	Rangap1	19387	2216.67	-0.472398	0.0508882	-9.28305	1.64692e-20	2.88266e-19
ENSMUSG00000039126	Prune2	353211	3110.09	-0.585566	0.0630882	-9.28171	1.66785e-20	2.91653e-19
ENSMUSG00000027635	Dsn1	66934	308.773	-1.55008	0.167136	-9.27433	1.78734e-20	3.12253e-19
ENSMUSG00000031821	Gins2	272551	403.785	-1.18386	0.127656	-9.27386	1.79525e-20	3.13337e-19
ENSMUSG00000029816	Gpnmb	93695	287483	0.370939	0.0400063	9.27201	1.82674e-20	3.18231e-19
ENSMUSG00000022422	Dscc1	72107	84.9725	-2.39124	0.257909	-9.27165	1.83291e-20	3.19006e-19
ENSMUSG00000101878	Gm8203	666634	4622.64	-0.577231	0.0622729	-9.26939	1.87213e-20	3.25525e-19
ENSMUSG00000014075	Tctex1d2	66061	542.977	0.838645	0.0904801	9.26883	1.88202e-20	3.26937e-19
ENSMUSG00000042286	Stab1	192187	77064.6	-0.5201	0.0561166	-9.2682	1.89311e-20	3.28555e-19
ENSMUSG00000060131	Atp8b4	241633	1890.55	-0.709054	0.0765311	-9.26492	1.95227e-20	3.38503e-19
ENSMUSG00000079491	H2-T10	15024	214.928	1.75409	0.18941	9.26083	2.02853e-20	3.51397e-19
ENSMUSG00000020300	Cpeb4	67579	4488.16	0.509268	0.05501	9.25773	2.08831e-20	3.61413e-19
ENSMUSG00000090186	Gm7592	665338	164.73	2.50351	0.270699	9.24831	2.28062e-20	3.94326e-19
ENSMUSG00000024151	Msh2	17685	1346.23	-0.665289	0.0719768	-9.24309	2.39475e-20	4.13671e-19
ENSMUSG00000032220	Myo1e	71602	8784.74	0.389474	0.0421622	9.23753	2.52246e-20	4.35325e-19
ENSMUSG00000082088	Gm15753	624083	304.324	1.42345	0.154113	9.23641	2.54917e-20	4.39523e-19
ENSMUSG00000071713	Csf2rb	12983	19706.5	0.523295	0.0566719	9.23376	2.61285e-20	4.50082e-19
ENSMUSG00000075701	Selenos	109815	3419.27	0.432223	0.0468437	9.22693	2.78496e-20	4.79283e-19
ENSMUSG00000021266	Wars	22375	4379.47	0.430787	0.0467644	9.21185	3.20551e-20	5.51145e-19
ENSMUSG00000004070	Hmox2	15369	3216.34	0.546014	0.0592801	9.21074	3.23883e-20	5.55839e-19
ENSMUSG00000047810	Ccdc88b	78317	3478.7	0.727716	0.0790067	9.21081	3.23677e-20	5.55839e-19
ENSMUSG00000023973	Cnpy3	72029	4991.6	0.41254	0.0448263	9.20308	3.4783e-20	5.96381e-19
ENSMUSG00000041645	Ddx24	27225	5141.41	0.591464	0.0642977	9.19883	3.61857e-20	6.19856e-19
ENSMUSG00000001763	Tspan33	232670	862.288	0.696256	0.0758571	9.17852	4.37055e-20	7.47976e-19
ENSMUSG00000041801	Phlda3	27280	819.614	-0.819257	0.0892942	-9.1748	4.52394e-20	7.7351e-19
ENSMUSG00000050994	Adgb	215772	389.779	-1.08342	0.11809	-9.17454	4.53491e-20	7.74669e-19
ENSMUSG00000028680	Plk3	12795	1659.94	-0.596167	0.0650095	-9.17046	4.70986e-20	8.03811e-19
ENSMUSG00000056121	Fez2	225020	5042.16	0.417111	0.0454879	9.16973	4.74215e-20	8.08573e-19
ENSMUSG00000016528	Mapkapk2	17164	20787.1	0.411326	0.0448642	9.16824	4.8079e-20	8.19028e-19
ENSMUSG00000014226	Cacybp	12301	3858.01	0.385559	0.042077	9.16317	5.03936e-20	8.57666e-19
ENSMUSG00000038241	Cep250	16328	1343.54	-0.663365	0.0724077	-9.16152	5.1173e-20	8.7013e-19
ENSMUSG00000019970	Sgk1	20393	13060.1	0.367941	0.0401921	9.15457	5.45772e-20	9.2716e-19
ENSMUSG00000025059	Gk	14933	2228.31	-0.486463	0.0531683	-9.1495	5.71999e-20	9.70822e-19
ENSMUSG00000021250	Fos	14281	1473.82	-0.759485	0.0831139	-9.13787	6.36923e-20	1.08002e-18
ENSMUSG00000002068	Ccne1	12447	233.01	-1.68025	0.183985	-9.13256	6.68993e-20	1.13336e-18
ENSMUSG00000011148	Adssl1	11565	4716.5	-0.668735	0.0732285	-9.13217	6.71423e-20	1.13643e-18
ENSMUSG00000038587	Akap12	83397	245.018	-1.73742	0.190304	-9.12975	6.86574e-20	1.16101e-18
ENSMUSG00000062421	Arf2	11841	3249.73	0.446106	0.0489188	9.11932	7.55969e-20	1.27603e-18
ENSMUSG00000068739	Sars	20226	5907.72	0.481444	0.0527946	9.1192	7.56825e-20	1.2763e-18
ENSMUSG00000020898	Ctc1	68964	1968.78	-0.583046	0.0639441	-9.11806	7.64839e-20	1.28864e-18
ENSMUSG00000027995	Tlr2	24088	27560.2	0.555845	0.0609641	9.11758	7.68224e-20	1.29316e-18
ENSMUSG00000027398	Il1b	16176	3655.4	1.98075	0.217292	9.11563	7.82122e-20	1.31536e-18
ENSMUSG00000061852	Gm7582	665317	140.408	2.1158	0.232146	9.11409	7.93365e-20	1.33305e-18
ENSMUSG00000019866	Crybg1	11630	769.682	1.15474	0.126851	9.10315	8.77462e-20	1.47302e-18
ENSMUSG00000020532	Acaca	107476	1640.89	-1.00986	0.110985	-9.09906	9.11145e-20	1.52817e-18
ENSMUSG00000024404	Riok3	66878	9491.32	0.414824	0.0456008	9.09687	9.29718e-20	1.55791e-18
ENSMUSG00000024277	Mapre2	212307	8006.72	0.372653	0.0410037	9.08827	1.00631e-19	1.68473e-18
ENSMUSG00000030641	Ddias	74041	219.106	-1.64638	0.181397	-9.07614	1.12498e-19	1.87999e-18
ENSMUSG00000002227	Mov10	17454	2566.4	0.804804	0.0886873	9.07462	1.1407e-19	1.90453e-18
ENSMUSG00000032661	Oas3	246727	1930.5	4.39045	0.483894	9.07316	1.15612e-19	1.92854e-18
ENSMUSG00000016206	H2-M3	14991	2042.3	0.590748	0.065127	9.07071	1.18247e-19	1.97072e-18
ENSMUSG00000025757	Hspa4l	18415	1279.77	-0.54178	0.0597371	-9.06941	1.19661e-19	1.99248e-18
ENSMUSG00000073491	Ifi213	623121	310.607	4.76478	0.525447	9.06805	1.21165e-19	2.0157e-18
ENSMUSG00000004665	Cnn2	12798	1099.54	-0.744354	0.0821087	-9.06547	1.24063e-19	2.06206e-18
ENSMUSG00000022881	Rfc4	106344	343.75	-1.08534	0.119735	-9.06451	1.25168e-19	2.07855e-18
ENSMUSG00000041313	Slc7a1	11987	1138.08	0.874911	0.0965384	9.06283	1.27108e-19	2.10887e-18
ENSMUSG00000039740	Alg2	56737	2199.51	0.453628	0.0500663	9.06055	1.29792e-19	2.15148e-18
ENSMUSG00000015461	Atf6b	12915	4500.24	0.530773	0.0586195	9.05455	1.37136e-19	2.27116e-18
ENSMUSG00000026425	Srgap2	14270	10013.2	0.477231	0.0527221	9.05182	1.406e-19	2.32644e-18
ENSMUSG00000053819	Camk2d	108058	6319.41	0.332021	0.0367172	9.04266	1.52905e-19	2.5278e-18
ENSMUSG00000022797	Tfrc	22042	10785.2	0.560868	0.0620427	9.04003	1.56627e-19	2.587e-18
ENSMUSG00000027848	Olfml3	99543	2116.02	0.632933	0.070019	9.03945	1.57456e-19	2.59837e-18
ENSMUSG00000036611	Eepd1	67484	3932.36	0.426502	0.0472046	9.03518	1.63733e-19	2.69955e-18
ENSMUSG00000030095	Tmem43	74122	7441.07	-0.325272	0.036012	-9.03232	1.68077e-19	2.7687e-18
ENSMUSG00000024610	Cd74	16149	483.726	1.10782	0.122671	9.03079	1.70443e-19	2.80517e-18
ENSMUSG00000047843	Bri3	55950	1062.93	0.715688	0.0792877	9.02647	1.77293e-19	2.91531e-18
ENSMUSG00000037972	Snn	20621	378.405	1.0578	0.117199	9.02562	1.78676e-19	2.93543e-18
ENSMUSG00000010609	Psen2	19165	2862.35	0.388597	0.043061	9.02435	1.80767e-19	2.96714e-18
ENSMUSG00000055413	H2-Q5	15016	169.312	1.66746	0.184853	9.02045	1.87319e-19	3.07196e-18
ENSMUSG00000063245	Zfp993	100503000	979.038	0.680972	0.0755067	9.0187	1.90337e-19	3.11869e-18
ENSMUSG00000000326	Comt	12846	4750.24	-0.359424	0.0398596	-9.01725	1.92863e-19	3.15727e-18
ENSMUSG00000021371	Mcur1	76137	4597.68	0.536851	0.0595488	9.0153	1.96326e-19	3.21112e-18
ENSMUSG00000029780	Nt5c3	107569	992.494	0.916229	0.101758	9.00399	2.17659e-19	3.55689e-18
ENSMUSG00000029131	Dnajb6	23950	6022.08	0.498354	0.0553608	9.00193	2.2179e-19	3.62119e-18
ENSMUSG00000017631	Abr	109934	13173.9	0.314246	0.0349647	8.98753	2.52855e-19	4.12476e-18
ENSMUSG00000094708	Gm10359	100042349	6013.76	-0.430277	0.0478977	-8.98326	2.62862e-19	4.28422e-18
ENSMUSG00000074896	Ifit3	15959	8363.76	4.97132	0.553647	8.97921	2.72716e-19	4.44089e-18
ENSMUSG00000061833	Gm6311	622313	2549.26	-0.540871	0.0602677	-8.97447	2.84729e-19	4.63242e-18
ENSMUSG00000025351	Cd63	12512	54892	0.268294	0.0299088	8.97041	2.95407e-19	4.80193e-18
ENSMUSG00000050350	Gpr18	110168	122.855	1.956	0.218084	8.96901	2.99203e-19	4.85935e-18
ENSMUSG00000023094	Msrb2	76467	597.264	-0.765769	0.0853972	-8.96715	3.04299e-19	4.93777e-18
ENSMUSG00000053687	Dpep2	319446	2090.67	-0.537091	0.0599208	-8.96336	3.14938e-19	5.10592e-18
ENSMUSG00000060147	Serpinb6a	20719	9383.88	-0.459988	0.051359	-8.95633	3.35675e-19	5.43734e-18
ENSMUSG00000056673	Kdm5d	20592	339.657	-1.26792	0.14159	-8.95489	3.40064e-19	5.50361e-18
ENSMUSG00000034883	Lrr1	69706	45.5643	-3.10482	0.346852	-8.95144	3.50869e-19	5.6735e-18
ENSMUSG00000024613	Tcof1	21453	3332.21	0.632005	0.0706257	8.94865	3.59844e-19	5.81355e-18
ENSMUSG00000032375	Aph1b	208117	1262.35	-0.797383	0.0892072	-8.93855	3.94302e-19	6.36467e-18
ENSMUSG00000018012	Rac3	170758	519.021	0.772707	0.0864804	8.93506	4.06966e-19	6.56335e-18
ENSMUSG00000025591	Tma16	66282	1278.58	1.10065	0.123247	8.93048	4.24162e-19	6.8347e-18
ENSMUSG00000035365	Parpbp	75317	96.9339	-2.13247	0.238818	-8.92925	4.2891e-19	6.9052e-18
ENSMUSG00000057554	Lgals8	56048	4976.91	0.554615	0.062124	8.92755	4.35548e-19	7.00595e-18
ENSMUSG00000075266	Cenpw	66311	131.358	-1.63301	0.182935	-8.92675	4.38719e-19	7.05081e-18
ENSMUSG00000027122	Arl14ep	212772	1630.32	0.52244	0.0585588	8.92162	4.5951e-19	7.37853e-18
ENSMUSG00000010406	Mrpl52	68836	1382.95	0.766802	0.0859639	8.92004	4.6612e-19	7.47817e-18
ENSMUSG00000030088	Aldh1l1	107747	407.203	1.04584	0.117402	8.90818	5.18773e-19	8.31568e-18
ENSMUSG00000031502	Col4a1	12826	655.572	-1.17786	0.132245	-8.90667	5.2586e-19	8.42197e-18
ENSMUSG00000024055	Cyp4f13	170716	1034.71	0.734456	0.082577	8.89419	5.88488e-19	9.41683e-18
ENSMUSG00000026827	Gpd2	14571	1910.84	0.729857	0.082088	8.89115	6.04814e-19	9.6697e-18
ENSMUSG00000057219	Armc7	276905	914.644	0.668992	0.0752457	8.89077	6.06868e-19	9.69415e-18
ENSMUSG00000041633	Kctd12b	207474	806.51	-0.872345	0.0981613	-8.88684	6.28694e-19	1.00212e-17
ENSMUSG00000064267	Hvcn1	74096	8694.15	0.40131	0.0451581	8.88679	6.28971e-19	1.00212e-17
ENSMUSG00000073982	Rhog	56212	10167.1	0.40219	0.0452568	8.88683	6.28756e-19	1.00212e-17
ENSMUSG00000024014	Pim1	18712	395.172	1.36681	0.153879	8.88241	6.54278e-19	1.04154e-17
ENSMUSG00000072109	A530040E14Rik	621875	98.4194	2.18906	0.24647	8.88167	6.58646e-19	1.04759e-17
ENSMUSG00000019432	Ddx39b	53817	3724.96	0.370166	0.0416871	8.87962	6.70896e-19	1.06616e-17
ENSMUSG00000078566	Bnip3	12176	3306.58	-0.518315	0.0583858	-8.87741	6.84322e-19	1.08656e-17
ENSMUSG00000027984	Hadh	15107	2137.96	-0.44679	0.0503536	-8.87305	7.11665e-19	1.129e-17
ENSMUSG00000034206	Polq	77782	115.939	-2.06516	0.232842	-8.86934	7.35836e-19	1.16635e-17
ENSMUSG00000059743	Fdps	110196	1423.95	0.629297	0.0710102	8.86206	7.85516e-19	1.24402e-17
ENSMUSG00000030084	Plxna1	18844	9971.33	0.530403	0.0598634	8.86022	7.98547e-19	1.26358e-17
ENSMUSG00000079260	Tmppe	100504715	1754.41	0.499065	0.0563586	8.85517	8.35548e-19	1.32099e-17
ENSMUSG00000040466	Blvrb	233016	13203.1	0.360182	0.0406853	8.85289	8.52836e-19	1.34718e-17
ENSMUSG00000030474	Siglece	83382	2218	1.47914	0.167176	8.84779	8.92723e-19	1.40898e-17
ENSMUSG00000073403	Gm10499	69717	118.422	1.79416	0.202861	8.84426	9.21367e-19	1.45294e-17
ENSMUSG00000041406	BC055324	381306	258.432	-1.40413	0.158785	-8.84295	9.32277e-19	1.46889e-17
ENSMUSG00000066878	Gm10184	100043906	2349.44	-0.574778	0.065032	-8.83838	9.71198e-19	1.52891e-17
ENSMUSG00000026305	Lrrfip1	16978	5331.09	-0.4731	0.0535471	-8.83521	9.99087e-19	1.57148e-17
ENSMUSG00000029474	Rnf34	80751	1424.93	0.603422	0.0683433	8.82927	1.0536e-18	1.65581e-17
ENSMUSG00000015112	Slc25a13	50799	790.994	-0.805745	0.0913476	-8.82065	1.13796e-18	1.78687e-17
ENSMUSG00000031652	N4bp1	80750	2732.22	0.628903	0.0713179	8.8183	1.16211e-18	1.82324e-17
ENSMUSG00000035967	Ints6l	236790	2909.49	-0.609965	0.0693999	-8.78913	1.5072e-18	2.36264e-17
ENSMUSG00000035783	Acta2	11475	510.743	-1.52884	0.173965	-8.78818	1.52004e-18	2.38075e-17
ENSMUSG00000024121	Atp6v0c	11984	49748.7	0.273501	0.0311236	8.78759	1.52803e-18	2.39058e-17
ENSMUSG00000036622	Atp13a2	74772	21840	0.355556	0.0404614	8.78753	1.5289e-18	2.39058e-17
ENSMUSG00000021707	Dhfr	13361	299.493	-1.23144	0.140139	-8.78731	1.53181e-18	2.39309e-17
ENSMUSG00000032434	Cmtm6	67213	18754	0.42371	0.0482667	8.77853	1.65626e-18	2.58533e-17
ENSMUSG00000024981	Acsl5	433256	7971.97	0.401874	0.0458061	8.77338	1.73383e-18	2.70414e-17
ENSMUSG00000072235	Tuba1a	22142	11759.1	-0.412113	0.0470468	-8.75963	1.95884e-18	3.05249e-17
ENSMUSG00000024371	C2	12263	242.819	1.16909	0.133485	8.75822	1.98364e-18	3.08852e-17
ENSMUSG00000053113	Socs3	12702	3591.04	1.37253	0.156822	8.75212	2.09384e-18	3.25736e-17
ENSMUSG00000019210	Atp6v1e1	11973	11729.2	0.307786	0.03517	8.75138	2.10767e-18	3.27611e-17
ENSMUSG00000049866	Arl4c	320982	4417.87	-0.400141	0.0458185	-8.73317	2.47641e-18	3.84604e-17
ENSMUSG00000028907	Utp11	67205	2199.48	0.397969	0.0455784	8.73153	2.51261e-18	3.89899e-17
ENSMUSG00000033721	Vav3	57257	3121.87	-0.433346	0.0496389	-8.72997	2.54741e-18	3.94967e-17
ENSMUSG00000039236	Isg20	57444	278.966	3.23164	0.370183	8.72983	2.55052e-18	3.95117e-17
ENSMUSG00000038037	Socs1	12703	129.659	2.4648	0.282422	8.72739	2.60616e-18	4.03397e-17
ENSMUSG00000037742	Eef1a1	13627	73831.3	-0.441648	0.0506316	-8.72278	2.71456e-18	4.19825e-17
ENSMUSG00000091199	Gm2619	100040135	104.194	1.98243	0.22732	8.72088	2.76057e-18	4.26583e-17
ENSMUSG00000035824	Tk2	57813	3077.74	0.524477	0.0601446	8.72025	2.77576e-18	4.28572e-17
ENSMUSG00000025026	Add3	27360	984.306	-0.893187	0.102466	-8.71695	2.85805e-18	4.40909e-17
ENSMUSG00000072825	Cep170b	217882	845.293	-0.609838	0.0700773	-8.70236	3.2504e-18	5.01018e-17
ENSMUSG00000040883	Tmem205	235043	1193.41	0.600607	0.0690381	8.69965	3.3292e-18	5.12735e-17
ENSMUSG00000004891	Nes	18008	1052.16	-0.857436	0.0985627	-8.6994	3.33655e-18	5.1344e-17
ENSMUSG00000013089	Etv5	104156	6237.61	-0.406125	0.0466884	-8.69862	3.35943e-18	5.16328e-17
ENSMUSG00000023106	Denr	68184	2336.08	0.493286	0.0567089	8.69857	3.36091e-18	5.16328e-17
ENSMUSG00000026473	Glul	14645	3371.46	-0.37219	0.0428216	-8.69164	3.57241e-18	5.48363e-17
ENSMUSG00000042772	Smg7	226517	2473.69	0.480155	0.0553473	8.6753	4.12451e-18	6.32584e-17
ENSMUSG00000022529	Zfp263	74120	3816.36	0.461822	0.0532382	8.67464	4.14869e-18	6.35766e-17
ENSMUSG00000078606	Gm4070	100042856	8223.63	1.98981	0.229503	8.67006	4.3191e-18	6.6133e-17
ENSMUSG00000001552	Jup	16480	743.979	-1.09264	0.126181	-8.65933	4.74553e-18	7.26023e-17
ENSMUSG00000038058	Nod1	107607	1086.56	0.970816	0.112115	8.65907	4.75637e-18	7.27078e-17
ENSMUSG00000073647	Gm10557	383374	2066.7	0.453475	0.0524037	8.65348	4.99512e-18	7.62943e-17
ENSMUSG00000021583	Erap1	80898	4128.22	0.504928	0.0583565	8.65248	5.03905e-18	7.69018e-17
ENSMUSG00000027248	Pdia3	14827	36843.2	-0.274434	0.0317277	-8.64969	5.16414e-18	7.87456e-17
ENSMUSG00000027195	Hsd17b12	56348	5280.41	0.426209	0.0492854	8.64778	5.25128e-18	8.00083e-17
ENSMUSG00000019487	Trip10	106628	1391.26	0.582428	0.0673911	8.6425	5.49957e-18	8.37223e-17
ENSMUSG00000032089	Il10ra	16154	9860.42	0.411619	0.0476324	8.64159	5.54355e-18	8.43222e-17
ENSMUSG00000016541	Atxn10	54138	4901.83	-0.360891	0.0417974	-8.63429	5.90938e-18	8.98129e-17
ENSMUSG00000050029	Rap2c	72065	2479.66	0.548937	0.0635935	8.63197	6.03059e-18	9.15797e-17
ENSMUSG00000003623	Crot	74114	2130.56	-0.534403	0.0619688	-8.62375	6.47955e-18	9.83166e-17
ENSMUSG00000026080	Chst10	98388	1285.29	-0.884963	0.102663	-8.62011	6.68906e-18	1.01412e-16
ENSMUSG00000041057	Wdr43	72515	2313.81	0.499481	0.057982	8.61441	7.03028e-18	1.06498e-16
ENSMUSG00000045932	Ifit2	15958	15657.5	4.88676	0.567307	8.61395	7.05877e-18	1.06842e-16
ENSMUSG00000029777	Gars	353172	5126.94	0.343442	0.0398795	8.612	7.17967e-18	1.08583e-16
ENSMUSG00000046062	Ppp1r15b	108954	5897.87	0.384387	0.0446803	8.60304	7.76348e-18	1.17316e-16
ENSMUSG00000068749	Psma5	26442	4610.08	0.384878	0.0447528	8.60009	7.96552e-18	1.20271e-16
ENSMUSG00000041126	H2afv	77605	1508.37	-0.62153	0.0723826	-8.58673	8.94768e-18	1.3499e-16
ENSMUSG00000038539	Atf5	107503	272.51	1.19069	0.138684	8.58565	9.03225e-18	1.36155e-16
ENSMUSG00000042228	Lyn	17096	16242.3	0.390231	0.0454651	8.58308	9.23664e-18	1.39009e-16
ENSMUSG00000040018	Cox15	226139	2464.71	0.431497	0.0502824	8.58149	9.36538e-18	1.40832e-16
ENSMUSG00000026955	Sapcd2	72080	40.411	-3.19317	0.372396	-8.57464	9.93941e-18	1.49342e-16
ENSMUSG00000029552	Tes	21753	3719.78	-0.458776	0.0535076	-8.57403	9.9929e-18	1.50024e-16
ENSMUSG00000049488	Tmem67	329795	520.069	0.927119	0.10816	8.57175	1.01924e-17	1.52894e-16
ENSMUSG00000020707	Rnf135	71956	1156.06	0.606311	0.0707371	8.57133	1.02301e-17	1.53335e-16
ENSMUSG00000021559	Dapk1	69635	2706.96	-0.655016	0.0764568	-8.56713	1.06093e-17	1.5889e-16
ENSMUSG00000002111	Spi1	20375	15015.6	0.443029	0.0517251	8.56507	1.08008e-17	1.61626e-16
ENSMUSG00000020321	Mdh1	17449	8642.63	-0.346875	0.0405361	-8.55717	1.15673e-17	1.72878e-16
ENSMUSG00000068036	Afdn	17356	372.422	-1.30321	0.152295	-8.55713	1.15714e-17	1.72878e-16
ENSMUSG00000028066	Pmf1	67037	547.153	-0.765384	0.0896666	-8.53588	1.39088e-17	2.07631e-16
ENSMUSG00000095457	Gm8989	668128	187.745	1.81181	0.212273	8.53526	1.3984e-17	2.08586e-16
ENSMUSG00000026317	Cln8	26889	9152.64	0.379708	0.0444878	8.53511	1.4002e-17	2.08684e-16
ENSMUSG00000040528	Milr1	380732	2465.89	0.560803	0.0657207	8.53314	1.42431e-17	2.12107e-16
ENSMUSG00000026365	Cfh	12628	34860.3	-0.379363	0.0445334	-8.51862	1.6146e-17	2.40251e-16
ENSMUSG00000045868	Gvin1	74558	8838.74	1.97701	0.232092	8.51825	1.61987e-17	2.40842e-16
ENSMUSG00000078616	Trim30c	434219	202.21	3.7561	0.441164	8.51407	1.67933e-17	2.49482e-16
ENSMUSG00000027368	Dusp2	13537	188.568	1.96754	0.231099	8.51384	1.68262e-17	2.49769e-16
ENSMUSG00000025060	Slk	20874	5522.12	-0.364995	0.0429182	-8.50443	1.82486e-17	2.70666e-16
ENSMUSG00000026069	Il1rl1	17082	75.3177	-2.42912	0.285679	-8.50297	1.84798e-17	2.73875e-16
ENSMUSG00000026526	Fh1	14194	2413.6	-0.402344	0.0473426	-8.49857	1.91941e-17	2.84233e-16
ENSMUSG00000034994	Eef2	13629	22535.9	-0.33311	0.039226	-8.49207	2.02985e-17	3.00346e-16
ENSMUSG00000037826	Ppm1k	243382	549.447	0.766628	0.0902867	8.49105	2.04787e-17	3.0277e-16
ENSMUSG00000034088	Hdlbp	110611	11378.5	-0.285617	0.0336658	-8.48387	2.17816e-17	3.21776e-16
ENSMUSG00000030748	Il4ra	16190	9875.1	0.368528	0.0434618	8.47937	2.2642e-17	3.34219e-16
ENSMUSG00000032400	Zwilch	68014	119.972	-1.97703	0.233541	-8.46544	2.55182e-17	3.76373e-16
ENSMUSG00000049657	Zbtb5	230119	1026.43	0.699671	0.0827252	8.45777	2.72534e-17	4.01646e-16
ENSMUSG00000028560	Usp1	230484	1466.37	-0.484802	0.0573435	-8.45435	2.80654e-17	4.13281e-16
ENSMUSG00000078773	Rad54b	623474	86.9655	-2.07234	0.245314	-8.44771	2.97068e-17	4.37104e-16
ENSMUSG00000062488	Ifit3b	667370	3617.03	5.01801	0.594133	8.44594	3.01607e-17	4.4343e-16
ENSMUSG00000044468	Tent5c	74645	2837.87	0.528611	0.0625971	8.44465	3.04956e-17	4.47996e-16
ENSMUSG00000051339	2900026A02Rik	243219	712.714	-0.82259	0.0975473	-8.43274	3.3767e-17	4.95662e-16
ENSMUSG00000000253	Gmpr	66355	998.143	-0.591717	0.0701967	-8.42941	3.47409e-17	5.09551e-16
ENSMUSG00000044811	Cd300c2	140497	4373.82	0.392535	0.0466441	8.41553	3.91118e-17	5.73206e-16
ENSMUSG00000057244	Gm6139	108169072	1618.45	-0.510303	0.0606473	-8.41426	3.95372e-17	5.78981e-16
ENSMUSG00000026274	Pask	269224	111.626	-2.25538	0.268132	-8.41146	4.04939e-17	5.9252e-16
ENSMUSG00000022150	Dab2	13132	49138.1	-0.401977	0.0478173	-8.40652	4.22349e-17	6.17505e-16
ENSMUSG00000022801	Lrch3	70144	3160.81	0.491302	0.058464	8.4035	4.33378e-17	6.3313e-16
ENSMUSG00000056216	Cebpg	12611	4518.08	0.320437	0.0381337	8.40298	4.35296e-17	6.35429e-16
ENSMUSG00000031451	Gas6	14456	37120.8	-0.545371	0.0649333	-8.39894	4.50522e-17	6.57137e-16
ENSMUSG00000046591	Ticrr	77011	136.752	-1.96748	0.234409	-8.39335	4.72495e-17	6.88641e-16
ENSMUSG00000040918	Slc19a2	116914	883.741	-0.658244	0.0784729	-8.38816	4.93803e-17	7.1913e-16
ENSMUSG00000032815	Fanca	14087	215.057	-1.69751	0.202454	-8.38466	5.0873e-17	7.40284e-16
ENSMUSG00000026548	Slamf9	98365	1166.33	0.752561	0.0897707	8.38315	5.15315e-17	7.49276e-16
ENSMUSG00000007891	Ctsd	13033	1.20728e+06	-0.293344	0.0350307	-8.3739	5.57416e-17	8.09855e-16
ENSMUSG00000060073	Psma3	19167	6256.66	0.335626	0.0401014	8.36944	5.78926e-17	8.40443e-16
ENSMUSG00000028358	Zfp618	72701	174.664	-1.86665	0.223158	-8.36468	6.02798e-17	8.74413e-16
ENSMUSG00000022372	Sla	20491	3421.71	0.445975	0.0533194	8.36421	6.05206e-17	8.77216e-16
ENSMUSG00000052681	Rap1b	215449	25413.2	0.263006	0.03146	8.36	6.27205e-17	9.08389e-16
ENSMUSG00000029175	Slc35f6	74919	5755.03	0.350642	0.0419463	8.35931	6.30863e-17	9.12971e-16
ENSMUSG00000030605	Mfge8	17304	1693.38	-0.499203	0.0597464	-8.35536	6.52325e-17	9.43291e-16
ENSMUSG00000032788	Pdxk	216134	5859.76	0.477755	0.0571959	8.35295	6.65794e-17	9.62016e-16
ENSMUSG00000068040	Tm9sf4	99237	7982.07	0.37334	0.0447071	8.3508	6.7802e-17	9.78915e-16
ENSMUSG00000026249	Serpine2	20720	1384.01	-0.740056	0.0886365	-8.34933	6.86491e-17	9.9037e-16
ENSMUSG00000028970	Abcb1b	18669	2405.84	-0.474461	0.056855	-8.34511	7.11497e-17	1.02564e-15
ENSMUSG00000038305	Spats2l	67198	177.243	1.81787	0.217948	8.34088	7.37417e-17	1.06218e-15
ENSMUSG00000028041	Adam15	11490	10489.9	-0.430859	0.0516713	-8.33846	7.52627e-17	1.08324e-15
ENSMUSG00000024750	Zfand5	22682	9272.15	0.370646	0.0444526	8.338	7.55588e-17	1.08666e-15
ENSMUSG00000034271	Jdp2	81703	1022.2	0.654765	0.0785445	8.33624	7.6692e-17	1.1021e-15
ENSMUSG00000028893	Sesn2	230784	2299.75	0.586699	0.0703933	8.33458	7.77705e-17	1.11673e-15
ENSMUSG00000021591	Glrx	93692	9749.49	0.365144	0.0438668	8.32392	8.51001e-17	1.22102e-15
ENSMUSG00000039197	Adk	11534	1769.04	-0.468208	0.0562526	-8.32332	8.55302e-17	1.22624e-15
ENSMUSG00000031429	Psmd10	53380	2378.52	0.443331	0.0532887	8.31941	8.84016e-17	1.26643e-15
ENSMUSG00000043131	Mob1a	232157	20996.4	0.358359	0.0431483	8.30527	9.95919e-17	1.42563e-15
ENSMUSG00000020492	Ska2	66140	138.759	-1.53817	0.185244	-8.30348	1.01106e-16	1.44618e-15
ENSMUSG00000029119	Man2b2	17160	5866.46	-0.315313	0.0380099	-8.29554	1.08092e-16	1.54491e-15
ENSMUSG00000045210	Vcpip1	70675	4293.93	0.497788	0.0600239	8.29316	1.10283e-16	1.57501e-15
ENSMUSG00000025395	Prim1	19075	409.408	-0.903054	0.108923	-8.29075	1.12536e-16	1.60594e-15
ENSMUSG00000018395	Kif3a	16568	8141.87	-0.477199	0.0575985	-8.28492	1.18184e-16	1.68524e-15
ENSMUSG00000059791	Nrm	106582	398.704	-1.10157	0.133124	-8.27474	1.28734e-16	1.83425e-15
ENSMUSG00000030104	Edem1	192193	26679.6	-0.266682	0.0322397	-8.27184	1.31911e-16	1.87808e-15
ENSMUSG00000032690	Oas2	246728	1583.86	2.79839	0.339174	8.2506	1.57602e-16	2.24213e-15
ENSMUSG00000029998	Pcyox1	66881	14466.8	-0.375868	0.0455777	-8.24676	1.62742e-16	2.31346e-15
ENSMUSG00000079339	Ifit1bl1	667373	168.864	4.16657	0.505259	8.24641	1.63231e-16	2.31863e-15
ENSMUSG00000038774	Ascc3	77987	3029.42	0.715161	0.0867255	8.24625	1.63441e-16	2.31984e-15
ENSMUSG00000030047	Arhgap25	232201	7261.71	-0.433222	0.0525461	-8.2446	1.65714e-16	2.35028e-15
ENSMUSG00000069083	Gm10259	100039592	2121.2	-0.590451	0.0716236	-8.2438	1.66827e-16	2.36425e-15
ENSMUSG00000025178	Pi4k2a	84095	7831.99	0.382498	0.0463991	8.24365	1.67034e-16	2.36537e-15
ENSMUSG00000039450	Dcxr	67880	1239.01	0.523865	0.0636054	8.23617	1.7781e-16	2.51604e-15
ENSMUSG00000094530	Gm21399	100862012	10460.5	0.337383	0.0410157	8.2257	1.94057e-16	2.74385e-15
ENSMUSG00000020346	Mgat1	17308	5709.29	0.325653	0.039595	8.22461	1.95832e-16	2.76683e-15
ENSMUSG00000017561	Crlf3	54394	4110.2	0.394803	0.048039	8.21839	2.06257e-16	2.91188e-15
ENSMUSG00000022439	Parvg	64099	1259.49	-0.641647	0.0780955	-8.21619	2.10068e-16	2.96342e-15
ENSMUSG00000026623	Lpgat1	226856	3997.94	-0.469691	0.0571816	-8.21401	2.13918e-16	3.01542e-15
ENSMUSG00000031729	Ist1	71955	3954.66	0.343244	0.0417951	8.21254	2.16564e-16	3.0504e-15
ENSMUSG00000009621	Vav2	22325	3235.45	0.432994	0.0527862	8.20279	2.34879e-16	3.30584e-15
ENSMUSG00000094796	BC147527	625360	54.6819	3.26376	0.398014	8.2001	2.40178e-16	3.37785e-15
ENSMUSG00000052296	Ppp6r1	243819	14242.5	0.376566	0.0460159	8.18339	2.75975e-16	3.87836e-15
ENSMUSG00000020092	Pald1	27355	3133.14	-0.682022	0.083344	-8.18321	2.76377e-16	3.88105e-15
ENSMUSG00000036273	Lrrk2	66725	398.73	-1.28912	0.157544	-8.18266	2.77655e-16	3.89604e-15
ENSMUSG00000016559	H3f3b	15081	34024.4	0.340121	0.0416012	8.17575	2.94026e-16	4.12261e-15
ENSMUSG00000004562	Arhgef40	268739	414.38	-0.950036	0.116297	-8.16905	3.10818e-16	4.35475e-15
ENSMUSG00000030788	Rnf141	67150	6527.56	-0.316637	0.0387669	-8.16771	3.14288e-16	4.40003e-15
ENSMUSG00000082762	Gm12366	620559	1737.05	-0.509775	0.0624646	-8.16101	3.32238e-16	4.64782e-15
ENSMUSG00000053063	Clec12a	232413	8011.29	0.309557	0.0379331	8.1606	3.33352e-16	4.65986e-15
ENSMUSG00000044674	Fzd1	14362	609.263	0.952302	0.116713	8.15934	3.36853e-16	4.70524e-15
ENSMUSG00000036093	Arl5a	75423	6638.03	0.382533	0.0468952	8.15718	3.42937e-16	4.7866e-15
ENSMUSG00000026796	Fam129b	227737	10309.6	-0.361364	0.044304	-8.15647	3.44966e-16	4.81129e-15
ENSMUSG00000004446	Bid	12122	2212.14	0.536209	0.0657567	8.15443	3.50816e-16	4.88919e-15
ENSMUSG00000029330	Cds1	74596	1978.2	0.551454	0.0676441	8.15229	3.57105e-16	4.97308e-15
ENSMUSG00000020263	Appl2	216190	3577.36	-0.544587	0.0668726	-8.14365	3.83541e-16	5.3356e-15
ENSMUSG00000026357	Rgs18	64214	418.903	-0.78514	0.096412	-8.14359	3.83715e-16	5.3356e-15
ENSMUSG00000036067	Slc2a6	227659	5770.43	0.553071	0.0679287	8.14194	3.88992e-16	5.40491e-15
ENSMUSG00000068417	Pnp2	667034	529.276	1.01116	0.124246	8.13835	4.00712e-16	5.56357e-15
ENSMUSG00000033777	Tlr13	279572	22410.6	-0.430236	0.0529033	-8.13249	4.2055e-16	5.83462e-15
ENSMUSG00000032530	Lyzl4	69032	245.699	-1.35616	0.166784	-8.13121	4.2504e-16	5.89248e-15
ENSMUSG00000041836	Ptpre	19267	4208.42	-0.435846	0.0536358	-8.12603	4.43583e-16	6.14494e-15
ENSMUSG00000021728	Emb	13723	787.944	-0.683296	0.0840948	-8.12531	4.46209e-16	6.17205e-15
ENSMUSG00000029247	Paics	67054	5338.85	-0.376625	0.0463516	-8.1254	4.45905e-16	6.17205e-15
ENSMUSG00000044703	Phf11a	219131	491.095	2.1062	0.259291	8.12294	4.5502e-16	6.28922e-15
ENSMUSG00000036887	C1qa	12259	69244.6	0.331879	0.0408727	8.11982	4.66863e-16	6.44809e-15
ENSMUSG00000093880	Tmem181c-ps	100040525	678.763	-0.752874	0.0927359	-8.11847	4.72081e-16	6.51529e-15
ENSMUSG00000090222	Ifi203-ps	100504287	97.8703	2.34708	0.289258	8.11413	4.89294e-16	6.7478e-15
ENSMUSG00000024740	Ddb1	13194	15239.7	-0.31233	0.0385035	-8.11173	4.99029e-16	6.87692e-15
ENSMUSG00000006517	Mvd	192156	633.711	0.776104	0.0956864	8.1109	5.02449e-16	6.91889e-15
ENSMUSG00000082016	Pgam1-ps2	668045	13977.6	-0.330972	0.0408411	-8.1039	5.32266e-16	7.32402e-15
ENSMUSG00000037649	H2-DMa	14998	401.435	-0.846565	0.104535	-8.09842	5.56781e-16	7.65564e-15
ENSMUSG00000032377	Plscr4	235527	338.895	-1.05333	0.13009	-8.09691	5.63731e-16	7.74543e-15
ENSMUSG00000038467	Chmp4b	75608	999.655	0.76562	0.0945762	8.09528	5.71338e-16	7.8441e-15
ENSMUSG00000008496	Pou2f2	18987	1579.29	0.746824	0.0922762	8.09336	5.80397e-16	7.96256e-15
ENSMUSG00000059810	Rgs3	50780	806.029	0.63585	0.0785785	8.09191	5.87341e-16	8.05185e-15
ENSMUSG00000046687	Gm5424	432466	330.806	-0.932719	0.115293	-8.09	5.96628e-16	8.17309e-15
ENSMUSG00000047180	Neurl3	214854	6292.96	0.316893	0.0391766	8.08884	6.02375e-16	8.2457e-15
ENSMUSG00000003363	Pld3	18807	35111.2	0.226576	0.0280208	8.08599	6.16608e-16	8.43429e-15
ENSMUSG00000036678	Aaas	223921	943.398	-0.705562	0.0873051	-8.08156	6.39411e-16	8.73972e-15
ENSMUSG00000063234	Gpr84	80910	9112.35	0.562646	0.069682	8.07448	6.7766e-16	9.25567e-15
ENSMUSG00000044221	Grsf1	231413	3011.53	0.450844	0.0558404	8.0738	6.81452e-16	9.30058e-15
ENSMUSG00000055912	Tmem150a	232086	528.814	0.72562	0.0899741	8.06477	7.33739e-16	1.00068e-14
ENSMUSG00000039195	1110008P14Rik	73737	830.689	0.708808	0.0879657	8.05777	7.76964e-16	1.05885e-14
ENSMUSG00000026875	Traf1	22029	274.927	1.4851	0.184309	8.05768	7.77549e-16	1.05887e-14
ENSMUSG00000072789	Gm10420	108169197	1478.78	-0.528141	0.0655549	-8.05647	7.85288e-16	1.06862e-14
ENSMUSG00000037012	Hk1	15275	2991.63	-0.362633	0.0450189	-8.05513	7.93945e-16	1.0796e-14
ENSMUSG00000029455	Aldh2	11669	26605.6	-0.258738	0.0321229	-8.05464	7.97154e-16	1.08317e-14
ENSMUSG00000005610	Eif4g2	13690	57272.1	0.357048	0.0443292	8.05445	7.98373e-16	1.08403e-14
ENSMUSG00000036896	C1qc	12262	96736.6	0.304436	0.0378057	8.05265	8.10203e-16	1.09928e-14
ENSMUSG00000036928	Stag3	50878	93.5023	-2.11575	0.262889	-8.04807	8.41078e-16	1.14033e-14
ENSMUSG00000029705	Cux1	13047	5965.79	-0.363228	0.04518	-8.03958	9.01496e-16	1.22135e-14
ENSMUSG00000035248	Tut7	214290	4081.16	0.415448	0.0517262	8.03167	9.6154e-16	1.30174e-14
ENSMUSG00000084133	Gm12856	100415963	65.7128	-2.3149	0.288301	-8.02945	9.79105e-16	1.32455e-14
ENSMUSG00000019810	Fuca2	66848	6979.1	-0.343267	0.0427529	-8.0291	9.81899e-16	1.32639e-14
ENSMUSG00000024579	Pcyox1l	240334	379.889	-0.907379	0.113011	-8.0291	9.81874e-16	1.32639e-14
ENSMUSG00000040093	Bmf	171543	877.583	0.860289	0.107152	8.02866	9.85397e-16	1.33014e-14
ENSMUSG00000050732	Vamp8	22320	5085.7	0.342914	0.0427154	8.02789	9.91653e-16	1.33761e-14
ENSMUSG00000026039	Sgo2a	68549	70.4722	-1.89848	0.236721	-8.0199	1.05831e-15	1.42544e-14
ENSMUSG00000022177	Haus4	219072	763.271	-0.789437	0.0984801	-8.01621	1.0906e-15	1.46786e-14
ENSMUSG00000037331	Larp1	73158	5835.02	0.513559	0.064076	8.01485	1.10272e-15	1.48309e-14
ENSMUSG00000095427	Rps2-ps6	100043752	1311.96	-0.485563	0.060619	-8.01007	1.14641e-15	1.54072e-14
ENSMUSG00000028587	Orc1	18392	115.747	-1.60962	0.201013	-8.00754	1.17025e-15	1.57163e-14
ENSMUSG00000033159	Cnppd1	69171	3678.08	0.381426	0.0476433	8.00587	1.18627e-15	1.59198e-14
ENSMUSG00000041219	Arhgap11a	228482	1892.2	-0.599845	0.0749336	-8.00502	1.19448e-15	1.60183e-14
ENSMUSG00000035530	Eif1	20918	15607	0.245181	0.030656	7.99781	1.26649e-15	1.69717e-14
ENSMUSG00000038244	Mical2	320878	962.911	-0.809544	0.10128	-7.99316	1.31528e-15	1.76127e-14
ENSMUSG00000000787	Ddx3x	13205	12236	-0.29461	0.0368627	-7.99208	1.32685e-15	1.77549e-14
ENSMUSG00000041064	Pif1	208084	73.6015	-2.56561	0.321142	-7.98903	1.36008e-15	1.81862e-14
ENSMUSG00000096292	Gm2666	100040213	34.7794	3.20033	0.400658	7.98769	1.37489e-15	1.8371e-14
ENSMUSG00000046057	Gm15428	433368	39.7255	-3.07468	0.384969	-7.98683	1.38453e-15	1.84865e-14
ENSMUSG00000028337	Coro2a	107684	1290.63	0.719714	0.09014	7.98441	1.412e-15	1.88396e-14
ENSMUSG00000091549	Gm6548	625054	331.49	0.946247	0.118522	7.9837	1.42007e-15	1.89336e-14
ENSMUSG00000047423	AI837181	107242	1442.85	0.491911	0.0616443	7.97983	1.46533e-15	1.9523e-14
ENSMUSG00000010067	Rassf1	56289	697.845	0.722622	0.0905851	7.97727	1.49604e-15	1.99178e-14
ENSMUSG00000024833	Pola2	18969	1045.21	-0.554523	0.0695379	-7.9744	1.53124e-15	2.03716e-14
ENSMUSG00000022314	Rad21	19357	3174.42	-0.394248	0.0494494	-7.97276	1.55167e-15	2.06286e-14
ENSMUSG00000039048	Foxred1	235169	1301.5	0.632845	0.0794119	7.96915	1.59775e-15	2.12259e-14
ENSMUSG00000047875	Gpr157	269604	2998.58	0.636699	0.0799479	7.96392	1.66671e-15	2.21261e-14
ENSMUSG00000023206	Il15ra	16169	392.223	1.14544	0.14384	7.96329	1.67526e-15	2.22236e-14
ENSMUSG00000026739	Bmi1	12151	2309.2	0.414947	0.0521251	7.9606	1.71202e-15	2.2695e-14
ENSMUSG00000003484	Cyp4f18	72054	497.582	-0.899199	0.112987	-7.95843	1.74233e-15	2.30802e-14
ENSMUSG00000090942	F830016B08Rik	240328	89.4146	3.05192	0.383917	7.94942	1.87393e-15	2.48058e-14
ENSMUSG00000031987	Egln1	112405	3213.41	-0.398975	0.050199	-7.94788	1.89732e-15	2.50973e-14
ENSMUSG00000026134	Prim2	19076	438.063	-0.860588	0.108397	-7.93924	2.03425e-15	2.68893e-14
ENSMUSG00000058672	Tubb2a	22151	7925.21	0.278612	0.0351027	7.93705	2.07049e-15	2.73488e-14
ENSMUSG00000027787	Nmd3	97112	1956.33	0.442164	0.0557854	7.92616	2.26026e-15	2.98341e-14
ENSMUSG00000060568	Fam78b	226610	252.14	-1.18488	0.149609	-7.91984	2.37808e-15	3.13669e-14
ENSMUSG00000037465	Klf10	21847	2712.47	-0.441159	0.0558774	-7.89513	2.90007e-15	3.8143e-14
ENSMUSG00000098112	Bin2	668218	5255.43	-0.350105	0.0443717	-7.89027	3.01523e-15	3.96294e-14
ENSMUSG00000057143	Trim12c	319236	725.75	0.956431	0.121255	7.88777	3.07642e-15	4.04048e-14
ENSMUSG00000030020	Prickle2	243548	196.695	-1.44469	0.183273	-7.88272	3.2033e-15	4.20413e-14
ENSMUSG00000040940	Arhgef1	16801	7246.42	-0.345853	0.0439224	-7.87417	3.4302e-15	4.49872e-14
ENSMUSG00000004947	Dtx2	74198	879.733	0.563407	0.0715781	7.87122	3.51203e-15	4.60278e-14
ENSMUSG00000022214	Dcaf11	28199	3965.77	0.406984	0.0517177	7.86934	3.56526e-15	4.66923e-14
ENSMUSG00000037519	Ppfia1	233977	2626.16	0.410814	0.0522647	7.86025	3.83363e-15	5.01714e-14
ENSMUSG00000025534	Gusb	110006	38626.1	-0.300054	0.0381848	-7.85793	3.90536e-15	5.10739e-14
ENSMUSG00000027351	Spred1	114715	13425.3	0.389947	0.0496253	7.85783	3.90835e-15	5.10768e-14
ENSMUSG00000018339	Gpx3	14778	6164.13	0.404351	0.0515067	7.85045	4.14557e-15	5.41005e-14
ENSMUSG00000038508	Gdf15	23886	239.858	1.19553	0.152287	7.8505	4.14382e-15	5.41005e-14
ENSMUSG00000060950	Trmt61a	328162	410.572	0.800648	0.102025	7.84755	4.24232e-15	5.5324e-14
ENSMUSG00000039952	Dag1	13138	8575.59	-0.315694	0.0403167	-7.83037	4.86431e-15	6.32566e-14
ENSMUSG00000082536	Gm13456	666531	5828.31	-0.40049	0.0511606	-7.82808	4.95364e-15	6.4373e-14
ENSMUSG00000039621	Prex1	277360	20790.3	0.331823	0.0424137	7.82349	5.13786e-15	6.67199e-14
ENSMUSG00000050628	Ubald2	319370	1095.55	-0.676229	0.086445	-7.82265	5.17237e-15	6.71209e-14
ENSMUSG00000032388	Spg21	27965	8721.71	0.323174	0.0413303	7.8193	5.31171e-15	6.88806e-14
ENSMUSG00000095403	Gm21092	100861634	6811.13	0.337082	0.0431435	7.81305	5.58224e-15	7.2338e-14
ENSMUSG00000026688	Mgst3	66447	1035.92	-0.508893	0.065178	-7.80774	5.82239e-15	7.53971e-14
ENSMUSG00000078495	Zfp984	100041677	713.997	0.687536	0.0881106	7.80311	6.04022e-15	7.81084e-14
ENSMUSG00000026880	Stom	13830	13772.8	-0.221805	0.0284438	-7.79803	6.288e-15	8.12555e-14
ENSMUSG00000031365	Zfp275	27081	1009.11	0.498821	0.0640012	7.79393	6.49559e-15	8.38794e-14
ENSMUSG00000034413	Neurl1b	240055	58.7352	-2.52442	0.324597	-7.77709	7.42137e-15	9.57674e-14
ENSMUSG00000029007	Agtrap	11610	2918.83	0.395724	0.0508986	7.77475	7.55954e-15	9.74822e-14
ENSMUSG00000001415	Smg5	229512	2513.9	0.410802	0.0528912	7.76692	8.04189e-15	1.0363e-13
ENSMUSG00000094017	Gm13160	666514	142.82	-1.40567	0.181006	-7.76584	8.11057e-15	1.04442e-13
ENSMUSG00000018572	Phf23	78246	2281.51	0.425602	0.0548066	7.76552	8.13084e-15	1.0463e-13
ENSMUSG00000049723	Mmp12	17381	41996.8	-0.360727	0.0465145	-7.75516	8.82327e-15	1.13382e-13
ENSMUSG00000021895	Arhgef3	71704	5153.99	0.356146	0.0459285	7.75437	8.87812e-15	1.14008e-13
ENSMUSG00000027907	S100a11	20195	745.411	-0.812534	0.104788	-7.7541	8.89713e-15	1.14173e-13
ENSMUSG00000042331	Specc1	432572	4043.02	-0.417687	0.0539225	-7.74607	9.47772e-15	1.21539e-13
ENSMUSG00000039886	Tmem120a	215210	3149.58	0.355817	0.0459558	7.74259	9.74123e-15	1.24831e-13
ENSMUSG00000044258	Ctla2a	13024	1903.23	0.587818	0.0759681	7.73769	1.01242e-14	1.29648e-13
ENSMUSG00000020227	Irak3	73914	2570.97	0.542178	0.0700725	7.73738	1.01489e-14	1.29875e-13
ENSMUSG00000028037	Ifi44	99899	2343.8	2.51033	0.324507	7.73583	1.02727e-14	1.31368e-13
ENSMUSG00000026994	Galnt3	14425	140.724	-1.26961	0.164343	-7.7254	1.11503e-14	1.42492e-13
ENSMUSG00000026822	Lcn2	16819	304.096	2.82706	0.366184	7.72034	1.16021e-14	1.48164e-13
ENSMUSG00000057337	Chst3	53374	109.661	-1.95432	0.253266	-7.71645	1.19615e-14	1.52647e-13
ENSMUSG00000018774	Cd68	12514	73461.7	0.216996	0.0281267	7.71494	1.21041e-14	1.54361e-13
ENSMUSG00000037470	Uggt1	320011	8560.35	-0.403043	0.0522624	-7.7119	1.23955e-14	1.57968e-13
ENSMUSG00000025993	Slc40a1	53945	35927.5	-0.293152	0.0380165	-7.71118	1.2466e-14	1.58757e-13
ENSMUSG00000032232	Cgnl1	68178	349.054	-0.98822	0.128157	-7.71102	1.24817e-14	1.58847e-13
ENSMUSG00000096606	Tpbgl	100503386	987.214	-0.683259	0.088614	-7.71051	1.25321e-14	1.59378e-13
ENSMUSG00000032411	Tfdp2	211586	1009.06	-0.79713	0.103395	-7.70955	1.26258e-14	1.6046e-13
ENSMUSG00000041498	Kif14	381293	54.7613	-2.95972	0.383929	-7.70902	1.26792e-14	1.61028e-13
ENSMUSG00000028128	F3	14066	164.102	-1.46062	0.189576	-7.70466	1.31188e-14	1.66496e-13
ENSMUSG00000029366	Dck	13178	3590.9	1.10892	0.143947	7.70368	1.32204e-14	1.6767e-13
ENSMUSG00000028459	Cd72	12517	6508.42	0.471937	0.0612632	7.70344	1.32447e-14	1.67863e-13
ENSMUSG00000060038	Dhps	330817	1068.26	0.517826	0.0672739	7.69728	1.38996e-14	1.76043e-13
ENSMUSG00000020962	Gtf2a1	83602	5003.14	0.376885	0.048972	7.69592	1.40481e-14	1.77801e-13
ENSMUSG00000015247	Nipsnap3b	66536	4548.19	0.329752	0.0428681	7.69225	1.44567e-14	1.82848e-13
ENSMUSG00000079553	Kifc1	100502766	71.9091	-2.15534	0.280205	-7.69202	1.44826e-14	1.8305e-13
ENSMUSG00000020694	Tlk2	24086	1065.52	0.58213	0.0756878	7.6912	1.45765e-14	1.8411e-13
ENSMUSG00000090215	Trim34b	434218	133.509	1.6538	0.215136	7.68724	1.50343e-14	1.89763e-13
ENSMUSG00000021054	Sgpp1	81535	5116.04	-0.373409	0.048587	-7.68536	1.52563e-14	1.92433e-13
ENSMUSG00000052698	Tln2	70549	2531.16	-0.679073	0.0883677	-7.68464	1.53432e-14	1.93397e-13
ENSMUSG00000030766	Arhgap17	70497	5591.96	0.268726	0.0349871	7.68071	1.58206e-14	1.99279e-13
ENSMUSG00000034667	Xpot	73192	7079.36	0.349829	0.0455611	7.67823	1.61307e-14	2.03047e-13
ENSMUSG00000024507	Hsd17b4	15488	6137.18	-0.305246	0.0397599	-7.67724	1.62554e-14	2.04477e-13
ENSMUSG00000035373	Ccl7	20306	574.889	1.9484	0.253828	7.67605	1.6407e-14	2.06244e-13
ENSMUSG00000020010	Vnn3	26464	38.6938	2.87773	0.375122	7.67145	1.70058e-14	2.13625e-13
ENSMUSG00000040829	Zmynd15	574428	642.181	0.937042	0.122148	7.67136	1.70178e-14	2.13631e-13
ENSMUSG00000031109	Enox2	209224	1136.98	0.477299	0.0622245	7.6706	1.71187e-14	2.14752e-13
ENSMUSG00000035919	Bbs9	319845	670.726	-0.717525	0.0935955	-7.66624	1.77114e-14	2.22036e-13
ENSMUSG00000039841	Zfp800	627049	1325.35	0.599385	0.0782375	7.6611	1.84343e-14	2.30942e-13
ENSMUSG00000021423	Ly86	17084	14933.9	0.326966	0.0426848	7.66001	1.85926e-14	2.32766e-13
ENSMUSG00000020326	Ccng1	12450	10754.3	-0.384674	0.0503126	-7.64567	2.07857e-14	2.60047e-13
ENSMUSG00000023830	Igf2r	16004	812.216	-0.737121	0.0964388	-7.64341	2.11539e-14	2.64473e-13
ENSMUSG00000040774	Cept1	99712	5675.7	0.418729	0.054796	7.6416	2.14532e-14	2.68035e-13
ENSMUSG00000021725	Parp8	52552	872.716	0.631278	0.0827451	7.6292	2.36221e-14	2.94933e-13
ENSMUSG00000026471	Mr1	15064	1208.34	-0.781344	0.102431	-7.62799	2.38448e-14	2.97512e-13
ENSMUSG00000024911	Fibp	58249	2215.12	0.355103	0.0466024	7.61984	2.53984e-14	3.16468e-13
ENSMUSG00000027580	Helz2	229003	1068.86	2.21622	0.290849	7.61986	2.53957e-14	3.16468e-13
ENSMUSG00000045817	Zfp36l2	12193	9719.99	-0.296875	0.0389809	-7.61593	2.61804e-14	3.25992e-13
ENSMUSG00000031627	Irf2	16363	2157.55	0.427043	0.0560879	7.61381	2.66135e-14	3.31162e-13
ENSMUSG00000017491	Rarb	218772	232.107	-1.23763	0.162666	-7.6084	2.77502e-14	3.45074e-13
ENSMUSG00000044533	Rps2	16898	8362.27	-0.327273	0.0430176	-7.60789	2.78609e-14	3.46218e-13
ENSMUSG00000029999	Tgfa	21802	611.751	0.751378	0.0987724	7.60717	2.80169e-14	3.47922e-13
ENSMUSG00000054752	Fsd1l	319636	250.604	-1.04768	0.137745	-7.60596	2.82805e-14	3.50959e-13
ENSMUSG00000006930	Hap1	15114	100.278	1.71617	0.225883	7.59759	3.01699e-14	3.73904e-13
ENSMUSG00000036299	BC031181	407819	3376.39	0.297527	0.0392078	7.58845	3.23746e-14	4.00958e-13
ENSMUSG00000063889	Crem	12916	1094.83	-0.65647	0.0865109	-7.58829	3.24148e-14	4.01188e-13
ENSMUSG00000021176	Efcab11	78767	75.6148	-1.90705	0.251419	-7.58514	3.32139e-14	4.10802e-13
ENSMUSG00000020115	Tbk1	56480	5959.52	0.322759	0.0425628	7.58313	3.37327e-14	4.1694e-13
ENSMUSG00000041164	Zmiz2	52915	4530.29	0.366124	0.0483071	7.57909	3.47981e-14	4.2982e-13
ENSMUSG00000032047	Acat1	110446	2114.64	-0.375658	0.0495969	-7.57423	3.61252e-14	4.45616e-13
ENSMUSG00000028098	Rnf115	67845	5135.77	0.314632	0.0415857	7.56588	3.8524e-14	4.74889e-13
ENSMUSG00000050106	Tmc8	217356	118.257	-1.6083	0.212597	-7.56503	3.87787e-14	4.77711e-13
ENSMUSG00000030759	Far1	67420	4842.98	-0.350893	0.0463921	-7.56365	3.91919e-14	4.82479e-13
ENSMUSG00000040712	Camta2	216874	5052.2	0.385802	0.0510528	7.55692	4.12735e-14	5.07427e-13
ENSMUSG00000037266	Rsrp1	27981	22712.2	0.587812	0.0778013	7.55529	4.17928e-14	5.13357e-13
ENSMUSG00000061665	Cd2ap	12488	3006.23	0.44151	0.0584377	7.55523	4.18114e-14	5.13357e-13
ENSMUSG00000040964	Arhgef10l	72754	715.262	0.674751	0.0893115	7.55503	4.18765e-14	5.13815e-13
ENSMUSG00000056220	Pla2g4a	18783	2475.7	-0.415985	0.0550631	-7.55469	4.1985e-14	5.14805e-13
ENSMUSG00000013662	Atad1	67979	3225.68	0.337317	0.0446703	7.55126	4.31078e-14	5.28221e-13
ENSMUSG00000035158	Mitf	17342	3589.6	0.682777	0.0904829	7.54592	4.49111e-14	5.49952e-13
ENSMUSG00000038963	Slco4a1	108115	100.466	-1.77534	0.235445	-7.54038	4.68614e-14	5.73454e-13
ENSMUSG00000038976	Ppp1r9b	217124	1415.15	0.498346	0.0661044	7.53878	4.74402e-14	5.80153e-13
ENSMUSG00000015488	Cacfd1	381356	1205.01	0.579023	0.0768196	7.53744	4.79288e-14	5.8574e-13
ENSMUSG00000024659	Anxa1	16952	7777.64	-0.344352	0.0456992	-7.53518	4.87677e-14	5.95598e-13
ENSMUSG00000053398	Phgdh	236539	852.12	0.595044	0.0789724	7.53484	4.88934e-14	5.96738e-13
ENSMUSG00000056211	R3hdm1	226412	2657.91	-0.469799	0.0624131	-7.52725	5.18189e-14	6.32026e-13
ENSMUSG00000027883	Gpsm2	76123	420.949	-0.928185	0.123381	-7.52295	5.35552e-14	6.52773e-13
ENSMUSG00000082424	Gm13292	100040898	1895.23	-0.405271	0.0538957	-7.51953	5.49717e-14	6.69596e-13
ENSMUSG00000026276	2021-09-02	18000	11258.3	-0.270805	0.036014	-7.51943	5.50142e-14	6.69672e-13
ENSMUSG00000081833	Gm13669	623453	117.263	-1.48062	0.196925	-7.5187	5.53244e-14	6.73004e-13
ENSMUSG00000031995	St14	19143	363.103	-0.999545	0.133044	-7.51286	5.78475e-14	7.03234e-13
ENSMUSG00000019558	Slc6a8	102857	2115.88	0.473587	0.0630745	7.50837	5.98701e-14	7.27343e-13
ENSMUSG00000031480	Thsd1	56229	393.253	-0.972832	0.129701	-7.50058	6.35371e-14	7.71384e-13
ENSMUSG00000062300	Nectin2	19294	1187.36	0.482266	0.0643045	7.49973	6.39508e-14	7.75897e-13
ENSMUSG00000034663	Bmp2k	140780	6055.77	-0.318415	0.0424944	-7.49311	6.72594e-14	8.14969e-13
ENSMUSG00000067869	Tcea1-ps1	56645	804.772	0.603652	0.0805602	7.49318	6.72257e-14	8.14969e-13
ENSMUSG00000022272	Myo10	17909	4171.46	0.493436	0.0658581	7.49241	6.76196e-14	8.18796e-13
ENSMUSG00000008540	Mgst1	56615	9820.83	0.318391	0.0424984	7.49184	6.79159e-14	8.21845e-13
ENSMUSG00000040111	Gramd1b	235283	2223.72	-0.593036	0.0791782	-7.48989	6.89304e-14	8.33575e-13
ENSMUSG00000057329	Bcl2	12043	870.237	-0.542981	0.0725007	-7.48931	6.9234e-14	8.36699e-13
ENSMUSG00000017466	Timp2	21858	44066.5	-0.294534	0.0393358	-7.48769	7.00967e-14	8.4657e-13
ENSMUSG00000069303	Hist1h2br	665622	302.803	0.971707	0.129781	7.48728	7.0314e-14	8.4864e-13
ENSMUSG00000005142	Man2b1	17159	40786.9	-0.250523	0.0334662	-7.48584	7.10908e-14	8.56895e-13
ENSMUSG00000069307	Hist1h2bq	665596	302.399	0.971707	0.129805	7.48588	7.10687e-14	8.56895e-13
ENSMUSG00000027074	Slc43a3	58207	309.436	-1.06036	0.141684	-7.48398	7.21029e-14	8.68528e-13
ENSMUSG00000056592	Zfp658	210104	482.586	-0.847252	0.113211	-7.48382	7.21936e-14	8.69053e-13
ENSMUSG00000003458	Ncstn	59287	12452.8	0.23707	0.0317076	7.47675	7.61844e-14	9.16496e-13
ENSMUSG00000022142	Nup155	170762	1377.46	-0.62056	0.0830086	-7.47585	7.67087e-14	9.22202e-13
ENSMUSG00000057315	Arhgap24	231532	993.062	-0.648883	0.086828	-7.4732	7.82671e-14	9.40325e-13
ENSMUSG00000041957	Pkp2	67451	352.219	-0.793619	0.106397	-7.45901	8.71777e-14	1.0467e-12
ENSMUSG00000028954	Nub1	53312	1919.7	0.397198	0.0532955	7.45275	9.14154e-14	1.09687e-12
ENSMUSG00000023349	Clec4n	56620	16523.9	0.473689	0.0635693	7.45153	9.22644e-14	1.10633e-12
ENSMUSG00000030630	Fah	14085	133.115	-1.43826	0.193034	-7.45081	9.27654e-14	1.11162e-12
ENSMUSG00000053483	Usp21	30941	1989.63	0.456222	0.0612375	7.45005	9.33036e-14	1.11734e-12
ENSMUSG00000020415	Pttg1	30939	958.663	0.677207	0.0909932	7.44239	9.8881e-14	1.18337e-12
ENSMUSG00000046805	Mpeg1	17476	93986.4	-0.264264	0.0355472	-7.43416	1.05237e-13	1.25861e-12
ENSMUSG00000022831	Hcls1	15163	10659.2	0.325916	0.0438555	7.43159	1.07303e-13	1.28166e-12
ENSMUSG00000021236	Entpd5	12499	1665.65	-0.486542	0.0654737	-7.43111	1.07692e-13	1.28549e-12
ENSMUSG00000027454	Gins1	69270	194.753	-1.03724	0.139585	-7.43086	1.07894e-13	1.28706e-12
ENSMUSG00000020715	Ern1	78943	2412.67	0.578217	0.0779322	7.41949	1.17572e-13	1.4016e-12
ENSMUSG00000039158	Akna	100182	3876	0.542252	0.0730925	7.41872	1.18262e-13	1.40892e-12
ENSMUSG00000063019	Manbal	69161	1285.62	0.506575	0.0683019	7.41671	1.20067e-13	1.4295e-12
ENSMUSG00000036197	Gxylt1	223827	2490.67	-0.410001	0.0553028	-7.41374	1.22785e-13	1.46092e-12
ENSMUSG00000073676	Hspe1	15528	1780.41	0.419604	0.0566005	7.41343	1.23072e-13	1.4634e-12
ENSMUSG00000035914	Cd276	102657	138.701	-1.42407	0.192113	-7.41265	1.23797e-13	1.47107e-12
ENSMUSG00000039217	Il18	16173	409.647	1.20951	0.163188	7.41177	1.2462e-13	1.47989e-12
ENSMUSG00000040852	Plekhh2	213556	435.153	-1.01065	0.136384	-7.41037	1.25949e-13	1.49472e-12
ENSMUSG00000037110	Ralgapa2	241694	1434.43	-0.836478	0.112939	-7.40644	1.29734e-13	1.53864e-12
ENSMUSG00000035722	Abca7	27403	4061.15	-0.342873	0.0463149	-7.40308	1.33061e-13	1.57608e-12
ENSMUSG00000082319	Gm8822	667799	6012.89	0.331088	0.044725	7.40276	1.33387e-13	1.57893e-12
ENSMUSG00000072115	Ang	11727	197.067	-1.28376	0.173462	-7.40081	1.35357e-13	1.60122e-12
ENSMUSG00000061024	Rrs1	59014	1545.52	0.564456	0.0762759	7.40019	1.35995e-13	1.60773e-12
ENSMUSG00000022175	Lrp10	65107	10263	0.331693	0.0448474	7.39604	1.4031e-13	1.65768e-12
ENSMUSG00000031824	6430548M08Rik	234797	2654.36	-0.453938	0.061473	-7.38435	1.53204e-13	1.80886e-12
ENSMUSG00000024640	Psat1	107272	1612.43	-0.657397	0.0890967	-7.37847	1.60125e-13	1.88937e-12
ENSMUSG00000024236	Svil	225115	1947.55	-0.623467	0.0845084	-7.37757	1.61208e-13	1.90094e-12
ENSMUSG00000021714	Cenpk	60411	86.1364	-1.9895	0.269737	-7.37571	1.63472e-13	1.9264e-12
ENSMUSG00000031506	Ptpn7	320139	1899.18	-0.460211	0.0624234	-7.37242	1.67558e-13	1.9733e-12
ENSMUSG00000062588	Gm6104	619829	62.0739	-1.95196	0.26505	-7.36448	1.77844e-13	2.0931e-12
ENSMUSG00000031239	Itm2a	16431	156.554	-1.28513	0.174572	-7.3616	1.81719e-13	2.13733e-12
ENSMUSG00000050989	Selenon	74777	6300.53	-0.323649	0.0439736	-7.36006	1.83826e-13	2.16074e-12
ENSMUSG00000080242	Atp6v0c-ps2	100039636	27568.3	0.212256	0.0288439	7.35879	1.85584e-13	2.18002e-12
ENSMUSG00000032586	Traip	22036	139.189	-1.66668	0.226532	-7.35735	1.87591e-13	2.2022e-12
ENSMUSG00000062611	Rps3a2	100043780	4585.21	-0.438538	0.0596389	-7.35322	1.93486e-13	2.26995e-12
ENSMUSG00000064127	Med14	26896	1849.44	-0.471703	0.0641744	-7.35033	1.97715e-13	2.3181e-12
ENSMUSG00000020422	Tns3	319939	5088.23	0.512052	0.0696773	7.34891	1.99831e-13	2.34142e-12
ENSMUSG00000061242	Gm9104	668319	147.595	-1.22896	0.167538	-7.33537	2.21113e-13	2.58914e-12
ENSMUSG00000003955	Fam162a	70186	1091.01	-0.468856	0.0639227	-7.33473	2.22169e-13	2.59986e-12
ENSMUSG00000039294	Cybc1	217370	3818.02	0.36268	0.0494631	7.33234	2.26166e-13	2.64495e-12
ENSMUSG00000020387	Jade2	76901	1145.02	0.460994	0.0628967	7.32939	2.31208e-13	2.70221e-12
ENSMUSG00000033813	Tcea1	21399	2518.87	0.391422	0.0534464	7.32363	2.41348e-13	2.81894e-12
ENSMUSG00000031903	Pla2g15	192654	19033.1	0.280799	0.0383428	7.32338	2.41802e-13	2.82245e-12
ENSMUSG00000021948	Prkcd	18753	23222.3	0.307548	0.0420189	7.31928	2.49297e-13	2.90789e-12
ENSMUSG00000038291	Snx25	102141	1356.42	-0.531925	0.0726752	-7.31921	2.49437e-13	2.90789e-12
ENSMUSG00000103865	Gm37416	105244086	85.2994	-1.68003	0.229832	-7.3098	2.67535e-13	3.1169e-12
ENSMUSG00000019990	Pde7b	29863	106.551	2.45038	0.335296	7.30811	2.7092e-13	3.15436e-12
ENSMUSG00000066258	Trim12a	76681	378.158	0.928711	0.127154	7.30382	2.79711e-13	3.25261e-12
ENSMUSG00000032042	Srpr	67398	7099.58	0.288751	0.039551	7.30072	2.86232e-13	3.32635e-12
ENSMUSG00000079523	Tmsb10	19240	864.758	-0.811018	0.111123	-7.2984	2.91216e-13	3.38214e-12
ENSMUSG00000059456	Ptk2b	19229	8252.55	0.2197	0.0301061	7.29753	2.93109e-13	3.40198e-12
ENSMUSG00000020775	Mrpl38	60441	1297.88	0.476138	0.0653342	7.28772	3.15238e-13	3.65653e-12
ENSMUSG00000014606	Slc25a11	67863	6986.97	0.265363	0.0364291	7.28437	3.23177e-13	3.74626e-12
ENSMUSG00000030516	Tjp1	21872	713.347	-0.699516	0.0960665	-7.28158	3.2994e-13	3.82226e-12
ENSMUSG00000026581	Sell	20343	217.585	-1.79718	0.246855	-7.28029	3.33103e-13	3.85648e-12
ENSMUSG00000061175	Fnip2	329679	11470.8	0.395863	0.0544039	7.27636	3.42937e-13	3.96785e-12
ENSMUSG00000018076	Med13l	76199	2115.01	0.575388	0.07909	7.2751	3.4616e-13	4.00263e-12
ENSMUSG00000029417	Cxcl9	17329	21.0476	5.33066	0.732757	7.27481	3.46915e-13	4.00885e-12
ENSMUSG00000026321	Tnfrsf11a	21934	7203.79	0.314835	0.043324	7.267	3.67562e-13	4.24478e-12
ENSMUSG00000055202	Zfp811	240063	55.9946	2.89967	0.399176	7.26414	3.75415e-13	4.33276e-12
ENSMUSG00000008845	Cd163	93671	459.605	-1.30481	0.179659	-7.26271	3.79412e-13	4.37616e-12
ENSMUSG00000020644	Id2	15902	10387.8	0.272436	0.0375398	7.25726	3.95003e-13	4.55314e-12
ENSMUSG00000021196	Pfkp	56421	2596.69	-0.451426	0.062238	-7.25323	4.0696e-13	4.68804e-12
ENSMUSG00000039917	Rhbdd2	215160	1185.16	0.543112	0.0750095	7.24058	4.46755e-13	5.14005e-12
ENSMUSG00000040751	Lat2	56743	5783.29	-0.387343	0.0534993	-7.24016	4.4815e-13	5.15289e-12
ENSMUSG00000044026	Slc35g1	240660	718.659	0.571306	0.0789249	7.23861	4.53313e-13	5.20901e-12
ENSMUSG00000027860	Vangl1	229658	340.991	-0.890076	0.123233	-7.2227	5.0967e-13	5.84932e-12
ENSMUSG00000005803	Sqor	59010	5555.24	-0.268033	0.0371105	-7.22256	5.10179e-13	5.85153e-12
ENSMUSG00000018286	Psmb6	19175	9888.57	0.302059	0.0418331	7.22058	5.1766e-13	5.93365e-12
ENSMUSG00000034714	Ttyh2	117160	6550.34	0.352659	0.0488798	7.21481	5.40102e-13	6.18705e-12
ENSMUSG00000000194	Gpr107	277463	4822.91	0.313697	0.0434853	7.21387	5.43848e-13	6.2261e-12
ENSMUSG00000083287	Gm13502	207933	302.815	0.925663	0.128329	7.21321	5.46483e-13	6.25239e-12
ENSMUSG00000037922	Bank1	242248	134.381	-1.5677	0.217433	-7.21002	5.5945e-13	6.39678e-12
ENSMUSG00000036223	Ska1	66468	69.2953	-2.11761	0.293857	-7.20624	5.75165e-13	6.5724e-12
ENSMUSG00000029822	Osbpl3	71720	1047.57	0.65001	0.0902041	7.20599	5.76241e-13	6.58063e-12
ENSMUSG00000041308	Sntb2	20650	1780.2	-0.610315	0.0847196	-7.20394	5.84964e-13	6.67611e-12
ENSMUSG00000070476	Fam217b	71532	353.231	-0.859636	0.119404	-7.19939	6.04845e-13	6.89875e-12
ENSMUSG00000029283	Cdc7	12545	147.737	-1.48242	0.205938	-7.19835	6.09456e-13	6.94705e-12
ENSMUSG00000023078	Cxcl13	55985	33.4659	3.02938	0.421041	7.19498	6.24683e-13	7.11622e-12
ENSMUSG00000003813	Rad23a	19358	3028.85	0.352355	0.0490157	7.18863	6.54459e-13	7.44623e-12
ENSMUSG00000078349	AW011738	100382	50.9058	2.67785	0.372519	7.1885	6.55076e-13	7.44866e-12
ENSMUSG00000043059	Zfp513	101023	1176.42	0.497519	0.0692142	7.18812	6.56905e-13	7.46486e-12
ENSMUSG00000052825	Gm9892	100040220	1075.47	0.504554	0.0702516	7.18211	6.86461e-13	7.79593e-12
ENSMUSG00000092243	Gm7030	630294	182.193	1.25634	0.174989	7.17952	6.9956e-13	7.93981e-12
ENSMUSG00000031971	Ccsap	73420	144.638	-1.39855	0.194982	-7.17271	7.35252e-13	8.33466e-12
ENSMUSG00000071796	6820431F20Rik	547150	5585.31	0.33568	0.0468108	7.171	7.44541e-13	8.43479e-12
ENSMUSG00000022180	Slc7a8	50934	12615	0.398906	0.0556434	7.16897	7.55629e-13	8.55514e-12
ENSMUSG00000025358	Cdk2	12566	1673.47	-0.494443	0.0690847	-7.15706	8.24281e-13	9.31529e-12
ENSMUSG00000038848	Ythdf1	228994	3176.74	0.411053	0.0574327	7.15712	8.23908e-13	9.31529e-12
ENSMUSG00000001166	Oas1c	114643	199.694	1.23966	0.173261	7.15486	8.37591e-13	9.45991e-12
ENSMUSG00000033088	Triobp	110253	2988.13	0.437841	0.0612144	7.15258	8.51637e-13	9.61268e-12
ENSMUSG00000027555	Car13	71934	807.029	0.729324	0.101975	7.15198	8.55373e-13	9.64894e-12
ENSMUSG00000024983	Vti1a	53611	2314.28	0.42063	0.0588151	7.15173	8.56892e-13	9.66017e-12
ENSMUSG00000004296	Il12b	16160	47.1998	2.66748	0.373546	7.14099	9.26629e-13	1.044e-11
ENSMUSG00000054604	Cggbp1	106143	7517.57	0.255412	0.035768	7.1408	9.27907e-13	1.0448e-11
ENSMUSG00000052798	Nup107	103468	933.381	-0.674537	0.094466	-7.14053	9.29711e-13	1.04619e-11
ENSMUSG00000026579	F5	14067	157.615	-1.9467	0.272775	-7.13665	9.56311e-13	1.07489e-11
ENSMUSG00000039176	Polg	18975	2973.93	-0.352184	0.0493487	-7.13664	9.56374e-13	1.07489e-11
ENSMUSG00000030341	Tnfrsf1a	21937	5850.89	0.269538	0.0377763	7.13511	9.67132e-13	1.08632e-11
ENSMUSG00000028527	Ak4	11639	386.922	-0.932985	0.130798	-7.13304	9.81734e-13	1.10205e-11
ENSMUSG00000087153	Gm6483	624198	3645.54	0.345542	0.0484557	7.13109	9.95787e-13	1.11715e-11
ENSMUSG00000024521	Pmaip1	58801	1049.09	0.491076	0.0688913	7.12827	1.01636e-12	1.13953e-11
ENSMUSG00000020057	Dram1	71712	4507.23	0.436951	0.0613183	7.12594	1.03371e-12	1.15828e-11
ENSMUSG00000026102	Inpp1	16329	699.351	-0.652023	0.0915238	-7.12407	1.04783e-12	1.17307e-11
ENSMUSG00000026749	Nek6	59126	9202.31	0.367862	0.0516566	7.1213	1.06915e-12	1.19581e-11
ENSMUSG00000026727	Rsu1	20163	5472.38	-0.25414	0.0357077	-7.11723	1.1012e-12	1.23092e-11
ENSMUSG00000018923	Med11	66172	1078.43	0.483064	0.0678772	7.11673	1.10514e-12	1.23457e-11
ENSMUSG00000002058	Unc119	22248	1088.64	-0.496994	0.0698608	-7.11406	1.1268e-12	1.25801e-11
ENSMUSG00000073591	Pcdhb22	93893	196.089	1.09404	0.153811	7.11293	1.13608e-12	1.2676e-11
ENSMUSG00000031875	Cmtm3	68119	9896.87	0.238516	0.0335557	7.10807	1.17678e-12	1.31223e-11
ENSMUSG00000031012	Cask	12361	2007.04	0.505476	0.0712073	7.09866	1.25973e-12	1.40388e-11
ENSMUSG00000041143	Tmco4	77056	693.074	0.588249	0.0829443	7.09209	1.32104e-12	1.47131e-11
ENSMUSG00000033444	Specc1l	74392	4521.55	0.36167	0.0510053	7.09084	1.333e-12	1.48373e-11
ENSMUSG00000017707	Serinc3	26943	84504.9	-0.262619	0.0370718	-7.08405	1.4e-12	1.55737e-11
ENSMUSG00000006411	Nectin4	71740	255.433	1.35041	0.190646	7.08332	1.40744e-12	1.5647e-11
ENSMUSG00000021485	Mxd3	17121	29.9562	-3.00161	0.423979	-7.07962	1.44554e-12	1.60609e-11
ENSMUSG00000066487	Gm5786	544872	1156.04	-0.509534	0.0720095	-7.07594	1.48444e-12	1.64832e-11
ENSMUSG00000043192	Gm1840	669429	495.866	-0.706502	0.0999133	-7.07115	1.53658e-12	1.7052e-11
ENSMUSG00000090231	Cfb	14962	27.8959	2.7325	0.386462	7.07054	1.54335e-12	1.71169e-11
ENSMUSG00000074578	Zfas1	68949	251.263	1.15211	0.162983	7.06888	1.56191e-12	1.73122e-11
ENSMUSG00000036333	Kidins220	77480	6139.95	-0.327477	0.0463305	-7.06829	1.56856e-12	1.73755e-11
ENSMUSG00000025203	Scd2	20250	5748.47	-0.452577	0.0640323	-7.06795	1.57239e-12	1.74075e-11
ENSMUSG00000042476	Abcb4	18670	1377.68	-0.529957	0.0749909	-7.06695	1.5837e-12	1.75223e-11
ENSMUSG00000039232	Stx11	74732	683.409	0.81878	0.115872	7.06622	1.59206e-12	1.76042e-11
ENSMUSG00000037347	Chst7	60322	305.31	1.12858	0.159761	7.06416	1.61591e-12	1.78573e-11
ENSMUSG00000030930	Chst15	77590	1244.92	0.474619	0.0672593	7.05655	1.70689e-12	1.88513e-11
ENSMUSG00000034731	Dgkh	380921	787.674	0.897439	0.127182	7.05635	1.70931e-12	1.88668e-11
ENSMUSG00000035376	Hacd2	70757	2248.3	-0.374973	0.0531682	-7.05257	1.75648e-12	1.93758e-11
ENSMUSG00000023169	Slc38a1	105727	3437.13	-0.297579	0.0421983	-7.05191	1.76474e-12	1.94554e-11
ENSMUSG00000066877	Nck2	17974	491.412	0.800046	0.113484	7.04983	1.79135e-12	1.97369e-11
ENSMUSG00000047643	Gm5454	432800	576.359	-0.655204	0.0929441	-7.04944	1.79634e-12	1.97801e-11
ENSMUSG00000002297	Dbf4	27214	854.629	-0.574005	0.0814999	-7.04302	1.88124e-12	2.07026e-11
ENSMUSG00000058799	Nap1l1	53605	4397.71	-0.365593	0.0519266	-7.04058	1.91448e-12	2.10559e-11
ENSMUSG00000028945	Rheb	19744	4931.47	0.303487	0.0431364	7.03553	1.98501e-12	2.18185e-11
ENSMUSG00000032487	Ptgs2	19225	482.772	0.990756	0.140833	7.03498	1.99285e-12	2.18917e-11
ENSMUSG00000032898	Fbxo21	231670	2272.16	-0.471709	0.0670553	-7.03462	1.99803e-12	2.19242e-11
ENSMUSG00000039156	Stim2	116873	1978.32	0.439896	0.0625331	7.03461	1.99818e-12	2.19242e-11
ENSMUSG00000079492	Gm11127	100529082	161.282	1.20619	0.171507	7.03289	2.02302e-12	2.21835e-11
ENSMUSG00000003123	Lipe	16890	668.551	0.669302	0.0951954	7.03082	2.05323e-12	2.25014e-11
ENSMUSG00000017485	Top2b	21974	4037.53	-0.386232	0.0549404	-7.03003	2.06496e-12	2.26166e-11
ENSMUSG00000033762	Recql4	79456	70.8494	-1.99929	0.284721	-7.02192	2.1884e-12	2.39543e-11
ENSMUSG00000033379	Atp6v0b	114143	9992.65	0.244643	0.0348552	7.01883	2.2374e-12	2.44762e-11
ENSMUSG00000032422	Snx14	244962	1713.17	-0.445306	0.0634645	-7.01662	2.27305e-12	2.48515e-11
ENSMUSG00000015002	Efr3a	76740	8761.38	0.289381	0.0412598	7.01363	2.32211e-12	2.53728e-11
ENSMUSG00000043257	Pigv	230801	798.924	0.559219	0.0797428	7.01278	2.33626e-12	2.55124e-11
ENSMUSG00000024456	Diaph1	13367	1759.41	-0.482996	0.0688894	-7.01118	2.36317e-12	2.57909e-11
ENSMUSG00000041642	Kif21b	16565	1562.33	-0.780645	0.111404	-7.00736	2.42854e-12	2.64887e-11
ENSMUSG00000037860	Aim2	383619	1158.74	0.506546	0.0723206	7.00417	2.4845e-12	2.70831e-11
ENSMUSG00000021024	Psma6	26443	6945.16	0.287145	0.0410015	7.0033	2.50007e-12	2.72368e-11
ENSMUSG00000046546	Fam43a	224093	339.742	-0.841035	0.120159	-6.99934	2.5718e-12	2.80016e-11
ENSMUSG00000000958	Slc7a7	20540	3062.28	0.45001	0.0642999	6.99861	2.58516e-12	2.81306e-11
ENSMUSG00000081534	Slc48a1	67739	22417.7	0.268958	0.0384432	6.99625	2.62912e-12	2.85921e-11
ENSMUSG00000086513	9130208D14Rik	77700	1033.75	1.824	0.26078	6.9944	2.66401e-12	2.89544e-11
ENSMUSG00000078521	Aunip	69885	45.1355	-2.55723	0.365699	-6.99274	2.69567e-12	2.92813e-11
ENSMUSG00000037752	Xkr8	381560	553.053	0.850587	0.121658	6.99165	2.7168e-12	2.94935e-11
ENSMUSG00000029502	Golga3	269682	4444.49	0.513112	0.0734147	6.98922	2.76416e-12	2.999e-11
ENSMUSG00000020593	Lpin1	14245	1184.9	-0.52511	0.0751483	-6.98764	2.79546e-12	3.03117e-11
ENSMUSG00000052593	Adam17	11491	28070	0.261581	0.0374606	6.98283	2.89286e-12	3.13496e-11
ENSMUSG00000074677	Sirpb1c	100038947	451.575	-0.787581	0.11281	-6.98149	2.92072e-12	3.16328e-11
ENSMUSG00000021125	Arg2	11847	543.865	0.824713	0.118154	6.98001	2.95157e-12	3.19483e-11
ENSMUSG00000078485	Plekhn1	231002	378.43	1.04181	0.149312	6.97739	3.00706e-12	3.25298e-11
ENSMUSG00000029591	Ung	22256	112.68	-1.3934	0.199833	-6.97282	3.10655e-12	3.35864e-11
ENSMUSG00000029490	Mfsd7a	243197	251.128	0.956976	0.137417	6.96404	3.30644e-12	3.57266e-11
ENSMUSG00000030691	Fchsd2	207278	2924	0.512275	0.0735635	6.96371	3.31432e-12	3.57907e-11
ENSMUSG00000057406	Nsd2	107823	2115.46	-0.52131	0.0748783	-6.96209	3.35252e-12	3.61821e-11
ENSMUSG00000037344	Slc12a9	83704	2577	0.49334	0.0708911	6.95913	3.42384e-12	3.69303e-11
ENSMUSG00000034850	Tmem127	69470	7154.89	0.293887	0.0422721	6.95225	3.59498e-12	3.87535e-11
ENSMUSG00000079659	Tmem243	652925	966.062	0.632962	0.09105	6.95181	3.6063e-12	3.88529e-11
ENSMUSG00000009035	Tmem184b	223693	8481.03	0.440283	0.0633359	6.95156	3.6128e-12	3.89003e-11
ENSMUSG00000041040	Fam117b	72750	2704.62	-0.398141	0.0572923	-6.94929	3.67132e-12	3.95074e-11
ENSMUSG00000032518	Rpsa	16785	9284.3	-0.347784	0.0500558	-6.94793	3.7069e-12	3.9867e-11
ENSMUSG00000029178	Klf3	16599	4321.2	0.380995	0.0548406	6.94732	3.72303e-12	4.00172e-11
ENSMUSG00000026939	Tmem141	51875	1265.18	-0.411167	0.0591851	-6.94715	3.72743e-12	4.00228e-11
ENSMUSG00000027613	Eif6	16418	4174.18	0.385239	0.0554529	6.94713	3.72789e-12	4.00228e-11
ENSMUSG00000040855	Reps2	194590	4861.6	-0.618196	0.0890399	-6.94291	3.84115e-12	4.12148e-11
ENSMUSG00000019066	Rab3d	19340	2515.76	-0.436866	0.0629293	-6.94217	3.8611e-12	4.14048e-11
ENSMUSG00000036533	Cdc42ep3	260409	361.345	-0.939627	0.135366	-6.9414	3.88225e-12	4.16074e-11
ENSMUSG00000025825	Iscu	66383	3488.62	0.336427	0.0484884	6.9383	3.96842e-12	4.25063e-11
ENSMUSG00000031539	Ap3m2	64933	1380.22	0.458782	0.0661504	6.93543	4.0498e-12	4.33528e-11
ENSMUSG00000039671	Zmynd8	228880	2727.29	-0.339175	0.0489098	-6.9347	4.07081e-12	4.35525e-11
ENSMUSG00000004980	Hnrnpa2b1	53379	18230.7	-0.238118	0.0343703	-6.92802	4.2676e-12	4.56314e-11
ENSMUSG00000017760	Ctsa	19025	93934.5	0.205454	0.0296753	6.9234	4.40922e-12	4.71184e-11
ENSMUSG00000059089	Fcgr4	246256	1405.02	0.59094	0.0854446	6.91606	4.64376e-12	4.95962e-11
ENSMUSG00000031880	Rrad	56437	619.724	0.653693	0.0945208	6.91586	4.65019e-12	4.96361e-11
ENSMUSG00000019471	Cdc37	12539	7492.79	0.315976	0.0457307	6.90951	4.86342e-12	5.18821e-11
ENSMUSG00000048924	Ccdc125	76041	346.194	-0.850311	0.123079	-6.90869	4.89154e-12	5.21519e-11
ENSMUSG00000097194	9330175E14Rik	320377	155.759	1.54107	0.223144	6.90614	4.9803e-12	5.30676e-11
ENSMUSG00000022436	Sh3bp1	20401	3997.69	0.309224	0.0447998	6.90234	5.11535e-12	5.44753e-11
ENSMUSG00000037818	Abhd18	269423	251.634	-0.894618	0.129649	-6.90034	5.18795e-12	5.52166e-11
ENSMUSG00000058446	Znrf2	387524	7638.6	0.260673	0.0378061	6.895	5.38636e-12	5.72953e-11
ENSMUSG00000025451	Paip1	218693	2010.46	0.496485	0.072008	6.89486	5.39175e-12	5.73195e-11
ENSMUSG00000030402	Ppm1n	232941	70.6214	1.75157	0.254294	6.88795	5.66015e-12	6.01383e-11
ENSMUSG00000050144	Slc25a44	229517	2737.89	0.381747	0.0554443	6.88523	5.76959e-12	6.12658e-11
ENSMUSG00000079017	Ifi27l2a	76933	3379.53	1.42986	0.208028	6.87337	6.27009e-12	6.6504e-11
ENSMUSG00000019302	Atp6v0a1	11975	17714.3	-0.224456	0.0326562	-6.87329	6.27392e-12	6.65064e-11
ENSMUSG00000031779	Ccl22	20299	38.1899	3.14108	0.457025	6.87288	6.29169e-12	6.66565e-11
ENSMUSG00000042997	Nhlrc3	212114	3824.31	0.365655	0.0532555	6.86605	6.60034e-12	6.98864e-11
ENSMUSG00000046794	Ppp1r3b	244416	1538.58	-0.505751	0.0736839	-6.86379	6.70567e-12	7.09609e-11
ENSMUSG00000050390	C77080	97130	2752.86	0.482742	0.0703798	6.85911	6.9293e-12	7.32855e-11
ENSMUSG00000034902	Pip5k1c	18717	15170.2	0.243289	0.0354753	6.85799	6.98346e-12	7.38161e-11
ENSMUSG00000000204	Slfn4	20558	84.5506	2.02749	0.295653	6.85768	6.99876e-12	7.39354e-11
ENSMUSG00000022586	Ly6i	57248	23.0539	3.30076	0.481519	6.8549	7.13644e-12	7.53467e-11
ENSMUSG00000057193	Slc44a2	68682	4697.82	-0.302284	0.044117	-6.85187	7.28904e-12	7.69139e-11
ENSMUSG00000059552	Trp53	22059	2715.2	-0.297256	0.043394	-6.85016	7.37661e-12	7.77936e-11
ENSMUSG00000068744	Psrc1	56742	142.594	-1.28857	0.188154	-6.84847	7.46441e-12	7.86746e-11
ENSMUSG00000039850	Endov	338371	584.093	0.624987	0.0912955	6.84576	7.60707e-12	8.01325e-11
ENSMUSG00000033540	Idua	15932	3881.51	0.312395	0.0457233	6.83229	8.35693e-12	8.79812e-11
ENSMUSG00000002210	Smg9	71997	1268.86	0.527692	0.0772561	6.83043	8.4662e-12	8.90808e-11
ENSMUSG00000068220	Lgals1	16852	20237.5	-0.346914	0.0508329	-6.8246	8.81721e-12	9.27213e-11
ENSMUSG00000030157	Clec2d	93694	108.06	1.69012	0.247704	6.82316	8.90604e-12	9.36021e-11
ENSMUSG00000031659	Adcy7	11513	10932.8	-0.272258	0.0399134	-6.82121	9.0278e-12	9.48279e-11
ENSMUSG00000035954	Dock4	238130	2826.58	-0.383394	0.0562142	-6.82023	9.08932e-12	9.54197e-11
ENSMUSG00000046006	Gapt	238875	121.775	-1.34691	0.1975	-6.81979	9.11768e-12	9.56631e-11
ENSMUSG00000068101	Cenpm	66570	58.3391	-2.39612	0.351362	-6.81952	9.13483e-12	9.57886e-11
ENSMUSG00000050107	Haspin	14841	309.355	-0.834786	0.122495	-6.81484	9.43688e-12	9.88998e-11
ENSMUSG00000002944	Cd36	12491	51442.7	-0.328343	0.0482187	-6.80946	9.79658e-12	1.02553e-10
ENSMUSG00000044768	D1Ertd622e	52392	5746.01	0.335393	0.0492644	6.80802	9.8952e-12	1.03527e-10
ENSMUSG00000028672	Hmgcl	15356	3775.92	-0.277437	0.0407667	-6.80547	1.0072e-11	1.05317e-10
ENSMUSG00000078162	Gm2574	100040053	215.917	-1.02908	0.151231	-6.80471	1.01252e-11	1.05813e-10
ENSMUSG00000034974	Dapk3	13144	1672.36	0.461954	0.0679306	6.80038	1.04342e-11	1.08981e-10
ENSMUSG00000047414	Flrt2	399558	1694.79	0.55778	0.0820456	6.79841	1.05776e-11	1.10417e-10
ENSMUSG00000025134	Alyref	21681	2838.54	-0.28155	0.0414155	-6.79818	1.05945e-11	1.1053e-10
ENSMUSG00000027466	Rbck1	24105	3424.33	0.371837	0.05475	6.79154	1.10943e-11	1.15679e-10
ENSMUSG00000057069	Ero1lb	67475	1441.39	-0.485148	0.0714774	-6.78743	1.1415e-11	1.18955e-10
ENSMUSG00000042572	Ube2q1	70093	5194.26	0.263137	0.0387874	6.7841	1.16813e-11	1.21663e-10
ENSMUSG00000025366	Esyt1	23943	9249.1	-0.291035	0.0429073	-6.78287	1.17814e-11	1.22636e-10
ENSMUSG00000029767	Calu	12321	10065	-0.375863	0.055437	-6.78001	1.20169e-11	1.25017e-10
ENSMUSG00000029915	Clec5a	23845	4333.89	-0.427084	0.0629987	-6.77926	1.20795e-11	1.25597e-10
ENSMUSG00000029521	Chek2	50883	1082.24	-0.590491	0.0871444	-6.776	1.23548e-11	1.28341e-10
ENSMUSG00000029649	Pomp	66537	4969.81	0.362341	0.0534744	6.77597	1.23573e-11	1.28341e-10
ENSMUSG00000020178	Adora2a	11540	59.3583	1.85595	0.273981	6.774	1.2527e-11	1.3003e-10
ENSMUSG00000038619	Ensa	56205	5808.33	0.257332	0.0379998	6.77192	1.27084e-11	1.31839e-10
ENSMUSG00000028410	Dnaja1	15502	6795.18	0.301949	0.0445932	6.77118	1.27736e-11	1.32441e-10
ENSMUSG00000026626	Ppp2r5a	226849	6085.68	0.348668	0.0515294	6.76638	1.32048e-11	1.36834e-10
ENSMUSG00000039323	Igfbp2	16008	169.204	-1.26927	0.187589	-6.76625	1.32164e-11	1.36879e-10
ENSMUSG00000043091	Tuba1c	22146	21526.5	-0.245708	0.0363429	-6.76082	1.37214e-11	1.42029e-10
ENSMUSG00000021273	Fdft1	14137	603.924	0.740211	0.109531	6.75798	1.39926e-11	1.44754e-10
ENSMUSG00000053175	Bcl3	12051	1466	0.558016	0.082575	6.75769	1.40209e-11	1.44966e-10
ENSMUSG00000044906	4930503L19Rik	269033	603.833	-0.762569	0.112882	-6.75546	1.42384e-11	1.47133e-10
ENSMUSG00000028419	Chmp5	76959	4984.78	0.261435	0.0387102	6.75365	1.44174e-11	1.489e-10
ENSMUSG00000034613	Ppm1h	319468	2799.84	0.333918	0.0494535	6.75216	1.45656e-11	1.50346e-10
ENSMUSG00000013076	Amotl1	75723	610.155	-0.623372	0.0923516	-6.74998	1.47861e-11	1.52537e-10
ENSMUSG00000033392	Clasp2	76499	2977.32	-0.384286	0.0569652	-6.74598	1.51993e-11	1.56712e-10
ENSMUSG00000046722	Cdc42se1	57912	7028.68	-0.245783	0.0364347	-6.74584	1.52144e-11	1.56779e-10
ENSMUSG00000038116	Phf20	228829	3672.65	0.344283	0.0510444	6.74477	1.53273e-11	1.57855e-10
ENSMUSG00000079455	Gm16026	101056250	97.401	1.44129	0.213707	6.74424	1.53831e-11	1.58342e-10
ENSMUSG00000002992	Apoc2	11813	2665.37	-0.444046	0.0658441	-6.7439	1.54191e-11	1.58623e-10
ENSMUSG00000026893	Gca	227960	496.888	0.804773	0.119373	6.74167	1.56579e-11	1.60991e-10
ENSMUSG00000079139	Gm4204	100043064	1059.54	-0.455653	0.0676191	-6.73852	1.60004e-11	1.6442e-10
ENSMUSG00000047821	Trim16	94092	354.246	-0.912067	0.135409	-6.73564	1.63214e-11	1.67626e-10
ENSMUSG00000019194	Scn1b	20266	1900.59	0.350766	0.0521049	6.73193	1.67426e-11	1.71856e-10
ENSMUSG00000031295	Phka2	110094	1970.52	-0.487658	0.0724745	-6.72869	1.71202e-11	1.75635e-10
ENSMUSG00000015932	Dstn	56431	9287.89	-0.222621	0.0330903	-6.72769	1.72376e-11	1.76741e-10
ENSMUSG00000073144	4930599N23Rik	75379	130.831	1.69473	0.252072	6.72318	1.77797e-11	1.82198e-10
ENSMUSG00000001348	Acp5	11433	94.0404	1.50847	0.224478	6.71992	1.81826e-11	1.86223e-10
ENSMUSG00000014554	Dguok	27369	1274.68	0.406013	0.0604471	6.71684	1.85713e-11	1.90098e-10
ENSMUSG00000021624	Cd180	17079	2940.02	0.460688	0.0686139	6.71421	1.89087e-11	1.93445e-10
ENSMUSG00000066551	Hmgb1	15289	11368.8	-0.289557	0.0431316	-6.71333	1.90228e-11	1.94504e-10
ENSMUSG00000029397	Rchy1	68098	1113.19	-0.485945	0.0724116	-6.71087	1.93463e-11	1.97593e-10
ENSMUSG00000038991	Txndc5	105245	8250.01	-0.282501	0.0421016	-6.70998	1.94653e-11	1.98699e-10
ENSMUSG00000024222	Fkbp5	14229	1272.86	-0.773168	0.115228	-6.70988	1.94781e-11	1.98719e-10
ENSMUSG00000022237	Ankrd33b	67434	501.74	0.814601	0.121424	6.70872	1.96334e-11	2.00194e-10
ENSMUSG00000038668	Lpar1	14745	83.6585	1.90277	0.283704	6.70687	1.98849e-11	2.02646e-10
ENSMUSG00000019838	Slc16a10	72472	3190.07	0.373897	0.0557934	6.70147	2.06337e-11	2.10161e-10
ENSMUSG00000033732	Sf3b3	101943	5205.81	-0.292721	0.0436816	-6.70126	2.06635e-11	2.10349e-10
ENSMUSG00000034341	Wbp2	22378	9326.19	0.211656	0.0315876	6.7006	2.0756e-11	2.11173e-10
ENSMUSG00000040188	Scamp2	24044	11285.2	0.327897	0.0489415	6.69978	2.0873e-11	2.12247e-10
ENSMUSG00000055322	Tns1	21961	378.185	0.851207	0.127098	6.69724	2.12389e-11	2.15849e-10
ENSMUSG00000073725	Lmbrd1	68421	6791.86	0.265567	0.0396602	6.69607	2.141e-11	2.17468e-10
ENSMUSG00000040818	Dennd6a	211922	2387.07	0.430041	0.0642781	6.69032	2.2268e-11	2.26059e-10
ENSMUSG00000014932	Yes1	22612	93.779	-1.80168	0.269326	-6.68961	2.2376e-11	2.27031e-10
ENSMUSG00000025980	Hspd1	15510	7216.15	0.296801	0.0443764	6.68825	2.25855e-11	2.2903e-10
ENSMUSG00000028480	Glipr2	384009	194.425	-1.03869	0.155349	-6.68615	2.29123e-11	2.32162e-10
ENSMUSG00000054385	Ceacam2	26367	64.6555	-1.65807	0.247988	-6.6861	2.29194e-11	2.32162e-10
ENSMUSG00000029110	Rnf4	19822	7559.77	0.257658	0.0385472	6.68423	2.32147e-11	2.35024e-10
ENSMUSG00000032698	Lmo2	16909	9523.52	0.229376	0.0343493	6.67775	2.42636e-11	2.45507e-10
ENSMUSG00000021608	Lpcat1	210992	2985.69	-0.42702	0.0639744	-6.67486	2.47472e-11	2.50264e-10
ENSMUSG00000032322	Pstpip1	19200	1061.22	-0.462382	0.0692781	-6.67429	2.48436e-11	2.51102e-10
ENSMUSG00000036103	Colec12	140792	43847.9	-0.280735	0.0420779	-6.67179	2.52694e-11	2.55265e-10
ENSMUSG00000041797	Abca9	217262	6724.73	-0.475144	0.0712777	-6.6661	2.62692e-11	2.65219e-10
ENSMUSG00000026342	Slc35f5	74150	3712.43	0.294551	0.0441896	6.66562	2.63552e-11	2.65818e-10
ENSMUSG00000033105	Lss	16987	959.558	0.513189	0.0769906	6.66561	2.63572e-11	2.65818e-10
ENSMUSG00000031765	Mt1	17748	5650.25	-0.291778	0.043797	-6.66205	2.70033e-11	2.72185e-10
ENSMUSG00000030747	Dgat2	67800	129.001	1.33539	0.200544	6.65884	2.75997e-11	2.78045e-10
ENSMUSG00000028063	Lmna	16905	2885.15	-0.405385	0.0608978	-6.65681	2.79829e-11	2.81752e-10
ENSMUSG00000038437	Mllt6	246198	536.245	0.918143	0.137955	6.65536	2.82604e-11	2.8439e-10
ENSMUSG00000029428	Stx2	13852	6250.85	-0.285764	0.0429482	-6.6537	2.85812e-11	2.87462e-10
ENSMUSG00000001473	Tubb6	67951	6072.9	-0.28904	0.043443	-6.65331	2.86566e-11	2.88063e-10
ENSMUSG00000050777	Tmem37	170706	1678.77	-0.454976	0.0684584	-6.64602	3.01117e-11	3.02526e-10
ENSMUSG00000019189	Rnf145	74315	5549.36	-0.244016	0.0367271	-6.64403	3.05222e-11	3.06483e-10
ENSMUSG00000032750	Gab3	210710	612.909	-0.715674	0.107755	-6.64171	3.10074e-11	3.11187e-10
ENSMUSG00000039774	Galnt12	230145	808.79	-0.517925	0.0779942	-6.64056	3.12492e-11	3.13443e-10
ENSMUSG00000048852	Gm12185	620913	119.497	1.49358	0.224961	6.63928	3.15225e-11	3.16012e-10
ENSMUSG00000051235	Gen1	209334	77.0763	-1.68687	0.254182	-6.63646	3.213e-11	3.21928e-10
ENSMUSG00000025375	Aatk	11302	1153.63	-0.556803	0.0839356	-6.63368	3.2741e-11	3.27872e-10
ENSMUSG00000027605	Acss2	60525	502.516	0.812157	0.122492	6.63031	3.34981e-11	3.35272e-10
ENSMUSG00000079227	Ccr5	12774	3419.22	-0.342077	0.0516082	-6.62834	3.39484e-11	3.39594e-10
ENSMUSG00000057135	Scimp	327957	90.5404	1.83456	0.276818	6.62731	3.41849e-11	3.41775e-10
ENSMUSG00000038806	Sde2	208768	1887.14	0.379727	0.0573028	6.62668	3.43327e-11	3.43067e-10
ENSMUSG00000035901	Dennd5a	19347	8629.28	-0.263049	0.0397129	-6.62375	3.50196e-11	3.49742e-10
ENSMUSG00000060183	Cxcl11	56066	16.5453	5.26415	0.79497	6.62182	3.54798e-11	3.54146e-10
ENSMUSG00000037075	Rnf139	75841	3137.35	0.378251	0.0571762	6.61553	3.70228e-11	3.69348e-10
ENSMUSG00000028563	Tm2d1	94043	2060.47	0.360238	0.054456	6.61521	3.71017e-11	3.69935e-10
ENSMUSG00000028896	Rcc1	100088	927.793	-0.412257	0.0623409	-6.61294	3.76753e-11	3.75452e-10
ENSMUSG00000035027	Map2k2	26396	4376.66	0.322204	0.0487428	6.61028	3.83583e-11	3.82052e-10
ENSMUSG00000063286	Gm8995	668139	5949.12	1.11736	0.169059	6.6093	3.86151e-11	3.84402e-10
ENSMUSG00000027422	Rrbp1	81910	10713.2	0.391995	0.0593268	6.60738	3.9119e-11	3.89209e-10
ENSMUSG00000050043	Tmx2	66958	3359.28	0.291716	0.0441639	6.60531	3.96696e-11	3.94474e-10
ENSMUSG00000024472	Dcp2	70640	791.574	0.904613	0.137078	6.59927	4.13174e-11	4.10418e-10
ENSMUSG00000042834	Nrep	27528	242.286	-1.17516	0.178166	-6.59586	4.22795e-11	4.19749e-10
ENSMUSG00000022761	Lztr1	66863	2987.44	-0.298074	0.0451996	-6.59462	4.26359e-11	4.2306e-10
ENSMUSG00000018909	Arrb1	109689	4508.25	-0.342174	0.0519306	-6.58906	4.42624e-11	4.38963e-10
ENSMUSG00000042155	Klhl23	277396	63.0176	-2.71473	0.412116	-6.5873	4.47904e-11	4.43961e-10
ENSMUSG00000029016	Clcn6	26372	968.423	0.598815	0.0909222	6.58601	4.51793e-11	4.47575e-10
ENSMUSG00000017057	Il13ra1	16164	4319.11	0.395764	0.0600937	6.58578	4.52508e-11	4.48044e-10
ENSMUSG00000051498	Tlr6	21899	1092.39	0.515713	0.0783348	6.58345	4.59648e-11	4.54869e-10
ENSMUSG00000066677	Ifi208	100033459	74.8855	5.20256	0.790704	6.57966	4.7153e-11	4.66378e-10
ENSMUSG00000037455	Slc18b1	76306	318.472	-0.939936	0.142881	-6.57845	4.75368e-11	4.69923e-10
ENSMUSG00000001017	Chtop	66511	2862.1	0.359367	0.0546305	6.57813	4.76402e-11	4.70692e-10
ENSMUSG00000022419	Deptor	97998	578.158	-0.814421	0.123811	-6.57793	4.77027e-11	4.70915e-10
ENSMUSG00000028830	AU040320	100317	3306.61	0.340063	0.0516978	6.5779	4.77138e-11	4.70915e-10
ENSMUSG00000026399	Cd55	13136	84.4474	1.6729	0.25441	6.57563	4.84475e-11	4.77902e-10
ENSMUSG00000027222	Pex16	18633	693.682	0.513805	0.0781693	6.57297	4.93202e-11	4.8625e-10
ENSMUSG00000063193	Cd300lb	217304	6412.62	-0.417455	0.0635259	-6.57141	4.98413e-11	4.91125e-10
ENSMUSG00000032565	Nudt16	75686	1121.17	0.494953	0.0753209	6.57126	4.98914e-11	4.91357e-10
ENSMUSG00000027204	Fbn1	14118	139.675	-1.90655	0.290347	-6.56647	5.15223e-11	5.07149e-10
ENSMUSG00000046668	Cxxc5	67393	357.254	-0.875321	0.133341	-6.56451	5.2204e-11	5.13585e-10
ENSMUSG00000036853	Mcoln3	171166	175.002	-1.1411	0.173934	-6.56051	5.36226e-11	5.2726e-10
ENSMUSG00000061313	Ddhd2	72108	1599	-0.41053	0.0625873	-6.55931	5.40581e-11	5.31259e-10
ENSMUSG00000059588	Calcrl	54598	1291.23	-0.57039	0.0870057	-6.55578	5.53536e-11	5.43702e-10
ENSMUSG00000031393	Mecp2	17257	1169.14	0.515962	0.0787345	6.55319	5.63211e-11	5.52911e-10
ENSMUSG00000096780	Tmem181b-ps	547127	1377.14	-0.566571	0.0864763	-6.55174	5.68691e-11	5.57994e-10
ENSMUSG00000024070	Prkd3	75292	2870.88	-0.386879	0.0591113	-6.54493	5.95215e-11	5.83709e-10
ENSMUSG00000043391	2510009E07Rik	72190	15114.3	-0.269932	0.0412531	-6.54331	6.01735e-11	5.8979e-10
ENSMUSG00000017765	Slc12a4	20498	2979.11	0.356362	0.0544644	6.54303	6.02855e-11	5.90574e-10
ENSMUSG00000036606	Plxnb2	140570	29852.4	-0.216909	0.0331567	-6.54194	6.07239e-11	5.94554e-10
ENSMUSG00000005973	Rcn1	19672	611.555	0.669239	0.102337	6.5396	6.16855e-11	6.03648e-10
ENSMUSG00000043079	Synpo	104027	96.3079	-1.51401	0.23177	-6.5324	6.47242e-11	6.3305e-10
ENSMUSG00000039105	Atp6v1g1	66290	12750.1	0.234913	0.0359675	6.53126	6.52191e-11	6.37553e-10
ENSMUSG00000026113	Inpp4a	269180	2287.17	-0.398485	0.0610412	-6.52813	6.65937e-11	6.50645e-10
ENSMUSG00000021384	Susd3	66329	2196.83	-0.51864	0.0794586	-6.52718	6.70203e-11	6.54466e-10
ENSMUSG00000003680	Taf6l	225895	3887.51	0.262651	0.040264	6.52324	6.88064e-11	6.71553e-10
ENSMUSG00000003518	Dusp3	72349	3307.65	-0.294581	0.0451607	-6.52296	6.89332e-11	6.72435e-10
ENSMUSG00000026922	Agpat2	67512	2046.37	0.382105	0.0585995	6.52062	7.00168e-11	6.82645e-10
ENSMUSG00000037563	Rps16	20055	3019.8	-0.304162	0.0466671	-6.51769	7.13974e-11	6.95739e-10
ENSMUSG00000026094	Stk17b	98267	4094.48	-0.331577	0.0508894	-6.51564	7.23808e-11	7.0495e-10
ENSMUSG00000005514	Por	18984	10522	0.305055	0.0468293	6.51418	7.30897e-11	7.11103e-10
ENSMUSG00000062604	Srpk2	20817	1534.87	-0.408602	0.0627244	-6.51425	7.30516e-11	7.11103e-10
ENSMUSG00000020668	Kif3c	16570	1611.55	0.406522	0.0624479	6.50978	7.52603e-11	7.31447e-10
ENSMUSG00000043015	Nemp2	227094	323.455	-0.863512	0.13265	-6.5097	7.52995e-11	7.31447e-10
ENSMUSG00000070327	Rnf213	672511	5868.51	1.85342	0.284712	6.50983	7.5237e-11	7.31447e-10
ENSMUSG00000084013	Gm14270	20461	881.063	0.441939	0.0679025	6.50843	7.59406e-11	7.37287e-10
ENSMUSG00000021282	Eif5	217869	9618.05	0.319433	0.049081	6.50828	7.60138e-11	7.37609e-10
ENSMUSG00000025555	Farp1	223254	87.8273	-1.69467	0.260478	-6.50601	7.7173e-11	7.48465e-10
ENSMUSG00000097418	Mir155hg	100653389	49.7622	3.39877	0.522519	6.50459	7.79059e-11	7.55176e-10
ENSMUSG00000031728	Zfp821	75871	438.286	0.725672	0.111591	6.50298	7.87431e-11	7.62891e-10
ENSMUSG00000062980	Cped1	214642	158.334	-1.17866	0.181311	-6.50077	7.99117e-11	7.73806e-10
ENSMUSG00000040723	Rcsd1	226594	3070.91	-0.285612	0.0439372	-6.50045	8.0081e-11	7.7504e-10
ENSMUSG00000029512	Ulk1	22241	3226.44	-0.423276	0.065125	-6.49945	8.06158e-11	7.79807e-10
ENSMUSG00000031697	Orc6	56452	429.343	-0.724218	0.111436	-6.49893	8.08916e-11	7.82065e-10
ENSMUSG00000031355	Arhgap6	11856	893.43	-0.540756	0.0832324	-6.49694	8.19698e-11	7.92075e-10
ENSMUSG00000046516	Cox17	12856	172.195	1.14348	0.176289	6.48639	8.79193e-11	8.4912e-10
ENSMUSG00000068335	Dok1	13448	1800	0.344387	0.0530949	6.48624	8.80029e-11	8.49484e-10
ENSMUSG00000018293	Pfn1	18643	29750.4	0.305192	0.0470557	6.48577	8.82817e-11	8.51729e-10
ENSMUSG00000055239	Kcmf1	74287	3219.23	0.264355	0.0408036	6.47871	9.251e-11	8.92057e-10
ENSMUSG00000002289	Angptl4	57875	368	-1.09994	0.16996	-6.47175	9.68768e-11	9.33678e-10
ENSMUSG00000020212	Mdm1	17245	464.287	-0.738733	0.114238	-6.46664	1.00205e-10	9.64946e-10
ENSMUSG00000024782	Ak3	56248	4792.64	-0.286964	0.0443763	-6.46661	1.00226e-10	9.64946e-10
ENSMUSG00000030120	Mlf2	30853	8105.38	0.246375	0.0381	6.46653	1.00278e-10	9.64946e-10
ENSMUSG00000037410	Tbc1d2b	67016	4365.48	0.403413	0.062407	6.46424	1.01812e-10	9.79194e-10
ENSMUSG00000038811	Gngt2	14710	1937.54	-0.38391	0.0594145	-6.46156	1.0363e-10	9.96163e-10
ENSMUSG00000048537	Phldb1	102693	614.2	-0.709992	0.109921	-6.45912	1.05314e-10	1.01183e-09
ENSMUSG00000044934	Zfp367	238673	617.956	-0.800925	0.124029	-6.45758	1.06388e-10	1.02161e-09
ENSMUSG00000093798	Gm8355	666904	8033.49	0.293929	0.0455518	6.45264	1.09915e-10	1.05493e-09
ENSMUSG00000023044	Csad	246277	1019.32	0.491442	0.0761762	6.45138	1.10838e-10	1.06324e-09
ENSMUSG00000031015	Swap70	20947	6113.14	0.275758	0.0427788	6.44615	1.14728e-10	1.09942e-09
ENSMUSG00000028874	Fgr	14191	218.491	-0.934237	0.144997	-6.44313	1.17038e-10	1.12097e-09
ENSMUSG00000073418	C4b	12268	466.339	0.854761	0.132729	6.43987	1.19572e-10	1.14464e-09
ENSMUSG00000000278	Scpep1	74617	16092.9	0.218001	0.0338576	6.43874	1.20467e-10	1.15215e-09
ENSMUSG00000018559	Ctdnep1	67181	1863.74	0.361502	0.056145	6.43872	1.20481e-10	1.15215e-09
ENSMUSG00000060538	Tmem219	68742	553.295	0.764121	0.118767	6.43378	1.24468e-10	1.18966e-09
ENSMUSG00000041488	Stx3	20908	1547.32	-0.43352	0.0674017	-6.43189	1.26027e-10	1.20394e-09
ENSMUSG00000038388	Mpp6	56524	1667.51	-0.344983	0.0536751	-6.42725	1.29934e-10	1.24063e-09
ENSMUSG00000036478	Btg1	12226	8945.37	0.28883	0.0449408	6.4269	1.30232e-10	1.24283e-09
ENSMUSG00000042628	Zfyve1	217695	2135.24	-0.381145	0.0593294	-6.42422	1.32545e-10	1.26424e-09
ENSMUSG00000030805	Stx4a	20909	2669.36	0.31945	0.049736	6.42292	1.33682e-10	1.27443e-09
ENSMUSG00000083282	Ctsf	56464	2666.98	-0.351496	0.0547732	-6.41729	1.38717e-10	1.32175e-09
ENSMUSG00000031701	Dnaja2	56445	6205.27	0.266538	0.0415352	6.41716	1.38836e-10	1.3222e-09
ENSMUSG00000028693	Nasp	50927	996.352	-0.47152	0.0735145	-6.41397	1.41781e-10	1.34955e-09
ENSMUSG00000010663	Fads1	76267	7064.25	0.379814	0.0592392	6.41154	1.4406e-10	1.37054e-09
ENSMUSG00000032180	Tmed1	17083	1008.81	0.45879	0.0715808	6.4094	1.46093e-10	1.38917e-09
ENSMUSG00000025212	Sfxn3	94280	3132.88	-0.34113	0.0532767	-6.40299	1.52363e-10	1.44804e-09
ENSMUSG00000074622	Mafb	16658	14853.6	-0.35829	0.0560974	-6.38692	1.69259e-10	1.60778e-09
ENSMUSG00000052911	Lamb2	16779	2635.37	-0.47235	0.073986	-6.38431	1.72171e-10	1.6343e-09
ENSMUSG00000060450	Rnf14	56736	5496.72	0.311974	0.0488662	6.38426	1.72227e-10	1.6343e-09
ENSMUSG00000020691	Mettl2	52686	752.366	0.579237	0.0907658	6.38167	1.75172e-10	1.66139e-09
ENSMUSG00000032725	Folr2	14276	4049.1	-0.335589	0.0525879	-6.38149	1.75377e-10	1.66248e-09
ENSMUSG00000076431	Sox4	20677	1415.82	-0.733614	0.114972	-6.38084	1.76124e-10	1.6687e-09
ENSMUSG00000027433	Xrn2	24128	5321.33	0.363233	0.0569276	6.38061	1.76382e-10	1.67029e-09
ENSMUSG00000031381	Piga	18700	380.916	-0.696515	0.10923	-6.37661	1.81052e-10	1.71364e-09
ENSMUSG00000060036	Rpl3	27367	12450.1	-0.227741	0.03572	-6.37573	1.82098e-10	1.72266e-09
ENSMUSG00000043740	B430306N03Rik	320148	5538.53	0.361114	0.0566847	6.37057	1.88328e-10	1.78068e-09
ENSMUSG00000070436	Serpinh1	12406	367.344	-1.17377	0.184316	-6.36826	1.91185e-10	1.80676e-09
ENSMUSG00000022901	Cd86	12524	2359.68	0.417267	0.0655396	6.36664	1.93214e-10	1.82501e-09
ENSMUSG00000020053	Igf1	16000	57017.4	0.189271	0.0297342	6.36543	1.94743e-10	1.83851e-09
ENSMUSG00000033808	Tmem87a	211499	2277.81	0.375242	0.0589769	6.36253	1.98458e-10	1.87263e-09
ENSMUSG00000026873	Phf19	74016	83.9945	-1.32494	0.208279	-6.36138	1.9995e-10	1.88574e-09
ENSMUSG00000030269	Mtmr14	97287	4299.44	0.344692	0.0542027	6.35932	2.02653e-10	1.91025e-09
ENSMUSG00000047409	Ctdspl	69274	193.063	-1.01838	0.160175	-6.3579	2.04535e-10	1.92702e-09
ENSMUSG00000038497	Tmco3	234076	4208	0.243674	0.038345	6.35478	2.08728e-10	1.96551e-09
ENSMUSG00000033032	Afap1l1	106877	1114.3	-0.568067	0.0894028	-6.35402	2.09758e-10	1.9742e-09
ENSMUSG00000035314	Gdpd5	233552	2214.36	-0.474123	0.0746241	-6.35348	2.10491e-10	1.9801e-09
ENSMUSG00000019122	Ccl9	20308	12030.1	0.397399	0.0625637	6.3519	2.12666e-10	1.99954e-09
ENSMUSG00000027775	Mfsd1	66868	19435	0.227666	0.0358976	6.34211	2.26645e-10	2.12988e-09
ENSMUSG00000021000	Mia2	338320	5984.6	0.240138	0.0379099	6.33445	2.38191e-10	2.23725e-09
ENSMUSG00000041781	Cpsf2	51786	2838.64	0.34393	0.0543844	6.32406	2.54778e-10	2.39183e-09
ENSMUSG00000013236	Ptprs	19280	4929.2	-0.306172	0.0484472	-6.3197	2.62074e-10	2.45783e-09
ENSMUSG00000069833	Ahnak	66395	8058.86	-1.1342	0.179521	-6.31792	2.65115e-10	2.48509e-09
ENSMUSG00000006342	Susd2	71733	26.243	3.17057	0.501999	6.31589	2.68602e-10	2.5165e-09
ENSMUSG00000028152	Tspan5	56224	1053.23	-0.46457	0.073583	-6.31355	2.72698e-10	2.55357e-09
ENSMUSG00000022515	Anks3	72615	1309.69	0.380128	0.0602521	6.30896	2.80909e-10	2.62913e-09
ENSMUSG00000010054	Tusc2	80385	1457.28	0.358709	0.0568686	6.30768	2.83248e-10	2.64967e-09
ENSMUSG00000029772	Ahcyl2	74340	5389.63	-0.337507	0.0535112	-6.30722	2.84096e-10	2.65627e-09
ENSMUSG00000068397	Gm10240	100503563	1956.67	0.329469	0.0522423	6.30655	2.85331e-10	2.66646e-09
ENSMUSG00000027309	4930402H24Rik	228602	2445.45	-0.373583	0.059245	-6.30573	2.86831e-10	2.67912e-09
ENSMUSG00000038160	Atg5	11793	4916.49	0.315367	0.0500152	6.30543	2.87403e-10	2.6831e-09
ENSMUSG00000083668	Gm5648	434907	44.153	-2.15388	0.341644	-6.30447	2.89181e-10	2.69834e-09
ENSMUSG00000029708	Gcc1	74375	1180.62	0.406841	0.0645662	6.30114	2.95468e-10	2.75561e-09
ENSMUSG00000029038	Ssu72	68991	2885.68	0.28641	0.0454703	6.29883	2.99897e-10	2.79551e-09
ENSMUSG00000041895	Wipi1	52639	520.707	-0.575599	0.0914601	-6.29344	3.105e-10	2.89289e-09
ENSMUSG00000031628	Casp3	12367	827.248	-0.49784	0.0791308	-6.29135	3.14724e-10	2.93075e-09
ENSMUSG00000046324	Ermp1	226090	1747.55	-0.448913	0.0713812	-6.28895	3.19613e-10	2.97479e-09
ENSMUSG00000042747	Krtcap2	66059	2814.08	0.32895	0.0523492	6.28377	3.30462e-10	3.07422e-09
ENSMUSG00000015536	Mocs2	17434	1944.21	0.383479	0.061028	6.28366	3.30704e-10	3.07491e-09
ENSMUSG00000055994	Nod2	257632	202.428	1.07939	0.171809	6.28247	3.33229e-10	3.09683e-09
ENSMUSG00000027900	Dram2	67171	8150.41	0.237847	0.0378807	6.27885	3.41087e-10	3.16826e-09
ENSMUSG00000014633	Cmc2	66531	321.74	-0.774905	0.123478	-6.27564	3.48199e-10	3.2327e-09
ENSMUSG00000029569	Tmem168	101118	6488.6	0.337049	0.053716	6.27465	3.50413e-10	3.24999e-09
ENSMUSG00000041538	H2-Ob	15002	52.9266	-1.90984	0.304373	-6.27466	3.50409e-10	3.24999e-09
ENSMUSG00000015092	Edf1	59022	3359.52	0.324085	0.0516649	6.27282	3.54556e-10	3.28676e-09
ENSMUSG00000039041	Adrm1	56436	3343.02	0.307126	0.0489641	6.27247	3.55376e-10	3.29271e-09
ENSMUSG00000030220	Arhgdib	11857	20982.3	0.218194	0.0347939	6.27103	3.58664e-10	3.32151e-09
ENSMUSG00000074748	Atxn7l3b	382423	2291.76	0.317819	0.0506921	6.26959	3.62004e-10	3.35076e-09
ENSMUSG00000031862	Atp13a1	170759	4756.02	0.239246	0.0381605	6.26947	3.6229e-10	3.35173e-09
ENSMUSG00000073557	Ppp1r12b	329251	1158.26	-0.54203	0.0864677	-6.26858	3.64353e-10	3.36913e-09
ENSMUSG00000017607	Tns4	217169	196.676	-1.03218	0.164853	-6.26121	3.82002e-10	3.53056e-09
ENSMUSG00000038150	Ormdl3	66612	1423.83	0.355421	0.0567838	6.25921	3.86941e-10	3.57441e-09
ENSMUSG00000062054	Iah1	67732	1244.21	0.384097	0.0613762	6.25807	3.89765e-10	3.5987e-09
ENSMUSG00000023004	Tuba1b	22143	32916.2	-0.238492	0.0381154	-6.2571	3.92201e-10	3.61939e-09
ENSMUSG00000030282	Cmas	12764	3779.06	-0.306296	0.0489949	-6.25159	4.06284e-10	3.74748e-09
ENSMUSG00000035505	Cox18	231430	347.956	0.712579	0.114037	6.24869	4.13922e-10	3.81602e-09
ENSMUSG00000028756	Pink1	68943	2994.39	-0.355103	0.0568556	-6.24569	4.2193e-10	3.8879e-09
ENSMUSG00000038759	Nup205	70699	4048.69	-0.33569	0.0537602	-6.24422	4.25926e-10	3.92277e-09
ENSMUSG00000031629	Cenpu	71876	67.8538	-1.75228	0.28066	-6.24341	4.28122e-10	3.94102e-09
ENSMUSG00000075391	Gm13443	654354	1263.43	-0.365963	0.0586177	-6.24322	4.28663e-10	3.94404e-09
ENSMUSG00000070923	Klhl9	242521	3817.26	-0.345853	0.0554248	-6.24003	4.37479e-10	4.02315e-09
ENSMUSG00000021115	Vrk1	22367	1137.53	-0.405435	0.0649774	-6.23962	4.38626e-10	4.03169e-09
ENSMUSG00000022724	Riox2	67014	858.194	0.523597	0.0839253	6.23885	4.40813e-10	4.04978e-09
ENSMUSG00000085501	Gm11772	105246895	66.3458	1.99601	0.320006	6.23742	4.44854e-10	4.08487e-09
ENSMUSG00000066894	Vsig10	231668	269.908	-0.88951	0.142674	-6.23456	4.5304e-10	4.15797e-09
ENSMUSG00000021670	Hmgcr	15357	2503.6	0.424422	0.0680772	6.23443	4.53434e-10	4.15952e-09
ENSMUSG00000022108	Itm2b	16432	141474	0.242743	0.0389641	6.22992	4.66666e-10	4.27878e-09
ENSMUSG00000035790	Cep19	66994	551.046	-0.63873	0.102528	-6.22979	4.67049e-10	4.28017e-09
ENSMUSG00000038047	Haus6	230376	556.834	-0.680973	0.10938	-6.22576	4.79226e-10	4.38958e-09
ENSMUSG00000033596	Rfwd3	234736	3177.17	-0.328677	0.0528144	-6.22325	4.86964e-10	4.45824e-09
ENSMUSG00000066148	Prpf4	70052	1342.71	0.419938	0.0675076	6.2206	4.95256e-10	4.53191e-09
ENSMUSG00000028163	Nfkb1	18033	3215.38	0.410091	0.0659344	6.21968	4.98157e-10	4.5562e-09
ENSMUSG00000026944	Abca2	11305	2925.88	-0.440034	0.0707671	-6.21806	5.03342e-10	4.60134e-09
ENSMUSG00000022639	Dubr	68190	483.012	-0.615215	0.098967	-6.21637	5.08786e-10	4.64881e-09
ENSMUSG00000031129	Slc9a9	331004	4344.5	-0.377377	0.0607333	-6.21367	5.17622e-10	4.72721e-09
ENSMUSG00000018882	Mrpl45	67036	1700.96	0.369865	0.0595391	6.21213	5.22695e-10	4.77118e-09
ENSMUSG00000027962	Vcam1	22329	88.6339	1.91216	0.308087	6.20656	5.41568e-10	4.94101e-09
ENSMUSG00000042502	Cd2bp2	70233	1788.81	0.35133	0.0566073	6.20643	5.42005e-10	4.94225e-09
ENSMUSG00000056602	Fry	320365	466.222	-1.00499	0.161929	-6.20637	5.4224e-10	4.94225e-09
ENSMUSG00000038732	Mboat1	218121	89.3006	-1.56216	0.251879	-6.20204	5.57347e-10	5.07744e-09
ENSMUSG00000004633	Chn2	69993	858.141	-0.546609	0.088135	-6.20195	5.57686e-10	5.07802e-09
ENSMUSG00000051390	Zbtb22	81630	1255.9	0.443176	0.0714761	6.20035	5.63394e-10	5.12747e-09
ENSMUSG00000024429	Gnl1	14670	2072.53	0.318184	0.0513207	6.19991	5.6495e-10	5.1391e-09
ENSMUSG00000032085	Tagln	21345	312.191	-1.13407	0.18299	-6.19745	5.73837e-10	5.21736e-09
ENSMUSG00000091905	Gm6395	623123	1767.91	0.500309	0.0807626	6.19481	5.83571e-10	5.30325e-09
ENSMUSG00000028458	Tesk1	21754	2433.25	0.312046	0.0503895	6.19268	5.91485e-10	5.37253e-09
ENSMUSG00000044197	Gpr146	80290	2775.41	0.346837	0.056014	6.19196	5.94188e-10	5.39443e-09
ENSMUSG00000034312	Iqsec1	232227	2660.77	-0.405021	0.0654145	-6.1916	5.95566e-10	5.40428e-09
ENSMUSG00000023055	Calcoco1	67488	2705.77	-0.354718	0.0573047	-6.19003	6.01533e-10	5.45575e-09
ENSMUSG00000018932	Map2k3	26397	4253.47	-0.258248	0.0417332	-6.18806	6.09081e-10	5.5215e-09
ENSMUSG00000018654	Ikzf1	22778	3819.09	0.365513	0.0590856	6.18617	6.16453e-10	5.58285e-09
ENSMUSG00000079547	H2-DMb1	14999	930.925	-0.478322	0.0773343	-6.18512	6.20552e-10	5.61722e-09
ENSMUSG00000062822	4833420G17Rik	67392	868.531	-0.601345	0.097285	-6.18127	6.35897e-10	5.7533e-09
ENSMUSG00000015961	Adss	11566	3108.22	-0.350452	0.0567479	-6.17559	6.59149e-10	5.96075e-09
ENSMUSG00000082480	Gm11687	627160	630.072	-0.474007	0.0767979	-6.17213	6.7376e-10	6.08989e-09
[truncated: 30,572 more rows]
