# Supplementary material for: Microglia show differential transcriptomic response to Aβ peptide aggregates ex vivo and in vivo
Source: Life Sci Alliance. 2021 Jun 14;4(7):e202101108. doi: 10.26508/lsa.202101108 (PMC8321667; doi:10.26508/lsa.202101108)
Supplement: Supplementary file 17 [file LSA-2021-01108_TableS17.xlsx]

## Sheet: Sheet1
category	ontology	term	over_represented_pvalue	BHadjust	numDEInCat	numInCat	totalDEG	totalNum	enrichment
GO:0001730	MF	2'-5'-oligoadenylate synthetase activity	8.5144e-09	6.95987e-07	6	6	1075	21152	19.6763
GO:0062061	MF	TAP complex binding	1.47368e-13	2.90663e-11	9	9	1075	21152	19.6763
GO:0046977	MF	TAP binding	1.41686e-14	3.09302e-12	11	11	1075	21152	19.6763
GO:0030881	MF	beta-2-microglobulin binding	2.60123e-10	2.92444e-08	9	11	1075	21152	16.0988
GO:0042610	MF	CD8 receptor binding	2.21055e-10	2.52456e-08	9	11	1075	21152	16.0988
GO:0042605	MF	peptide antigen binding	5.8954e-19	2.00845e-16	21	35	1075	21152	11.8058
GO:0042608	MF	T cell receptor binding	2.51078e-08	1.83184e-06	9	16	1075	21152	11.0679
GO:0097677	MF	STAT family protein binding	0.000479386	0.0130654	4	9	1075	21152	8.74501
GO:0035325	MF	Toll-like receptor binding	6.59637e-05	0.00231387	6	14	1075	21152	8.43269
GO:0050700	MF	CARD domain binding	0.000198218	0.00611375	5	12	1075	21152	8.19845
GO:0003823	MF	antigen binding	5.13633e-16	1.28323e-13	23	57	1075	21152	7.93955
GO:0008009	MF	chemokine activity	4.8229e-10	5.09121e-08	15	39	1075	21152	7.5678
GO:0003950	MF	NAD+ ADP-ribosyltransferase activity	4.19059e-06	0.000195084	8	22	1075	21152	7.15501
GO:1990404	MF	protein ADP-ribosylase activity	0.000426574	0.0117399	5	14	1075	21152	7.02724
GO:0070566	MF	adenylyltransferase activity	7.09799e-06	0.00031856	9	28	1075	21152	6.32452
GO:0048020	MF	CCR chemokine receptor binding	8.36615e-07	4.48957e-05	12	42	1075	21152	5.62179
GO:0042288	MF	MHC class I protein binding	0.0018767	0.0414515	5	18	1075	21152	5.46563
GO:0042379	MF	chemokine receptor binding	7.94925e-09	6.61995e-07	17	62	1075	21152	5.39511
GO:0016763	MF	transferase activity, transferring pentosyl groups	9.28912e-06	0.000406057	11	45	1075	21152	4.80976
GO:0042287	MF	MHC protein binding	0.000363458	0.0102668	7	29	1075	21152	4.74945
GO:0003725	MF	double-stranded RNA binding	6.3314e-08	4.15048e-06	18	84	1075	21152	4.21635
GO:0042887	MF	amide transmembrane transporter activity	0.000557844	0.0150037	8	41	1075	21152	3.83927
GO:0005125	MF	cytokine activity	1.3387e-09	1.3062e-07	32	208	1075	21152	3.02712
GO:0140375	MF	immune receptor activity	0.000161884	0.0051412	16	112	1075	21152	2.8109
GO:0005126	MF	cytokine receptor binding	2.37922e-10	2.68828e-08	44	322	1075	21152	2.68868
GO:0042277	MF	peptide binding	7.09309e-08	4.5962e-06	37	289	1075	21152	2.51911
GO:0070851	MF	growth factor receptor binding	0.000346938	0.00986207	18	146	1075	21152	2.42584
GO:0003924	MF	GTPase activity	2.63346e-06	0.000128167	33	285	1075	21152	2.27831
GO:0001217	MF	DNA-binding transcription repressor activity	8.90176e-05	0.00302565	26	238	1075	21152	2.14951
GO:0001227	MF	DNA-binding transcription repressor activity, RNA polymerase II-specific	8.90176e-05	0.00302565	26	238	1075	21152	2.14951
GO:0033218	MF	amide binding	5.41499e-06	0.00024647	38	353	1075	21152	2.11813
GO:0001664	MF	G protein-coupled receptor binding	3.75071e-05	0.00140324	30	288	1075	21152	2.04961
GO:0046982	MF	protein heterodimerization activity	2.91692e-06	0.000140754	52	556	1075	21152	1.84023
GO:0044389	MF	ubiquitin-like protein ligase binding	0.00103412	0.0252194	29	319	1075	21152	1.78875
GO:0048018	MF	receptor ligand activity	2.86174e-05	0.00109432	43	474	1075	21152	1.78498
GO:0030546	MF	signaling receptor activator activity	4.02861e-05	0.00149725	43	480	1075	21152	1.76267
GO:0030545	MF	receptor regulator activity	3.58602e-05	0.00134386	45	507	1075	21152	1.74642
GO:0005102	MF	signaling receptor binding	3.71363e-11	5.0967e-09	134	1593	1075	21152	1.65513
GO:0000978	MF	RNA polymerase II cis-regulatory region sequence-specific DNA binding	0.000119995	0.00393306	47	567	1075	21152	1.63101
GO:0042802	MF	identical protein binding	3.37203e-11	4.68025e-09	153	1869	1075	21152	1.61074
GO:0000987	MF	cis-regulatory region sequence-specific DNA binding	0.000225906	0.0068197	47	582	1075	21152	1.58898
GO:0046983	MF	protein dimerization activity	1.28586e-07	7.8996e-06	109	1386	1075	21152	1.54741
GO:0042803	MF	protein homodimerization activity	0.000269101	0.00793019	70	936	1075	21152	1.47152
GO:0046914	MF	transition metal ion binding	0.00018245	0.00568987	70	944	1075	21152	1.45905
GO:0044877	MF	protein-containing complex binding	6.01021e-05	0.00213491	90	1232	1075	21152	1.43739
GO:0000981	MF	DNA-binding transcription factor activity, RNA polymerase II-specific	0.00221976	0.0476253	53	761	1075	21152	1.37036
GO:0098772	MF	molecular function regulator	5.21718e-05	0.00188296	116	1698	1075	21152	1.3442
GO:0016740	MF	transferase activity	0.000417737	0.0115533	141	2214	1075	21152	1.2531
GO:0097367	MF	carbohydrate derivative binding	0.00196359	0.0429906	129	2074	1075	21152	1.22384
GO:0043168	MF	anion binding	0.000581382	0.015507	163	2640	1075	21152	1.21486
GO:0005515	MF	protein binding	2.26737e-12	3.7213e-10	522	8687	1075	21152	1.18234
GO:0003824	MF	catalytic activity	9.80599e-05	0.00330071	320	5553	1075	21152	1.13388
GO:0043167	MF	ion binding	0.000301607	0.00872798	307	5374	1075	21152	1.12404
GO:0005488	MF	binding	2.66224e-11	3.76481e-09	701	12814	1075	21152	1.07641
