# Supplementary material for: Microglia show differential transcriptomic response to Aβ peptide aggregates ex vivo and in vivo
Source: Life Sci Alliance. 2021 Jun 14;4(7):e202101108. doi: 10.26508/lsa.202101108 (PMC8321667; doi:10.26508/lsa.202101108)
Supplement: Supplementary file 19 [file LSA-2021-01108_TableS19.xlsx]

## Sheet: Sheet1
category	pathway_name	over_represented_pvalue	BHadjust	numDEInCat	numInCat	totalDEG	totalNum	enrichment
5330	Allograft rejection	3.74995e-13	2.81246e-11	20	49	1075	6309	2.39544
5332	Graft-versus-host disease	3.04159e-13	2.81246e-11	20	51	1075	6309	2.3015
4940	Type I diabetes mellitus	9.55511e-12	5.37475e-10	20	56	1075	6309	2.09601
5143	African trypanosomiasis	1.61594e-06	2.01992e-05	11	31	1075	6309	2.08249
4612	Antigen processing and presentation	5.19755e-14	1.16945e-11	25	74	1075	6309	1.98272
100	Steroid biosynthesis	0.000862623	0.00669276	6	18	1075	6309	1.95628
5144	Malaria	5.99198e-08	9.62996e-07	15	45	1075	6309	1.95628
5140	Leishmaniasis	1.26099e-10	5.67446e-09	21	64	1075	6309	1.92571
4623	Cytosolic DNA-sensing pathway	1.51673e-08	2.84388e-07	16	55	1075	6309	1.7073
5320	Autoimmune thyroid disease	6.46274e-10	1.81764e-08	18	64	1075	6309	1.65061
5150	Staphylococcus aureus infection	8.35411e-07	1.1748e-05	14	50	1075	6309	1.64327
5416	Viral myocarditis	3.36049e-10	1.26018e-08	23	85	1075	6309	1.58804
4672	Intestinal immune network for IgA production	7.48582e-05	0.000701795	10	42	1075	6309	1.39734
5323	Rheumatoid arthritis	3.2199e-07	4.82985e-06	19	81	1075	6309	1.37664
4621	NOD-like receptor signaling pathway	3.1109e-05	0.000333311	13	56	1075	6309	1.36241
4620	Toll-like receptor signaling pathway	1.04562e-08	2.13876e-07	23	101	1075	6309	1.33647
4622	RIG-I-like receptor signaling pathway	5.62138e-06	6.65689e-05	15	69	1075	6309	1.27583
4380	Osteoclast differentiation	2.47439e-08	4.28261e-07	25	116	1075	6309	1.26484
4145	Phagosome	4.75538e-10	1.52851e-08	33	167	1075	6309	1.15971
4514	Cell adhesion molecules	8.65339e-09	1.94701e-07	28	145	1075	6309	1.13329
4210	Apoptosis	3.61015e-05	0.00036922	16	85	1075	6309	1.10472
