# Supplementary material for: Microglia show differential transcriptomic response to Aβ peptide aggregates ex vivo and in vivo
Source: Life Sci Alliance. 2021 Jun 14;4(7):e202101108. doi: 10.26508/lsa.202101108 (PMC8321667; doi:10.26508/lsa.202101108)
Supplement: Supplementary file 21 [file LSA-2021-01108_TableS21.xlsx]

## Sheet: 1_GO_categories
oAbeta, 12hr	fAbeta, 12hr	category	ontology	term	over_represented_pvalue	BHadjust	numDEInCat	numInCat	totalDEG	totalNum	enrichment
down	down	GO:0008430	MF	selenium binding	8.02709e-05	0.0240652	4	9	978	21152	9.61236
down	down	GO:0001846	MF	opsonin binding	4.07104e-05	0.0147641	6	15	978	21152	8.65112
down	down	GO:0001221	MF	transcription cofactor binding	0.000350641	0.0625727	10	50	978	21152	4.32556
down	down	GO:0005096	MF	GTPase activator activity	0.000523201	0.0805766	27	237	978	21152	2.46393
down	down	GO:0030695	MF	GTPase regulator activity	0.000626111	0.0922773	28	255	978	21152	2.37482
down	down	GO:0005539	MF	glycosaminoglycan binding	0.000200122	0.0439502	22	201	978	21152	2.36722
down	down	GO:0005543	MF	phospholipid binding	0.000167662	0.03968	39	414	978	21152	2.0374
down	down	GO:0008289	MF	lipid binding	2.95455e-05	0.0118631	59	736	978	21152	1.73375
down	down	GO:0003700	MF	DNA-binding transcription factor activity	0.000171179	0.03968	73	988	978	21152	1.59801
down	down	GO:0140110	MF	transcription regulator activity	0.000610261	0.0908723	91	1335	978	21152	1.47426
up	down	GO:0010997	MF	anaphase-promoting complex binding	1.44797e-07	1.92649e-05	4	7	163	21152	74.1525
up	down	GO:0043515	MF	kinetochore binding	0.000938515	0.0556795	2	6	163	21152	43.2556
up	down	GO:0035174	MF	histone serine kinase activity	0.000829175	0.0498503	2	6	163	21152	43.2556
up	down	GO:0017116	MF	single-stranded DNA helicase activity	1.10533e-06	0.00012811	5	20	163	21152	32.4417
up	down	GO:0035173	MF	histone kinase activity	1.41406e-05	0.00129776	4	17	163	21152	30.5334
up	down	GO:0008574	MF	ATP-dependent microtubule motor activity, plus-end-directed	3.19061e-06	0.000332134	5	26	163	21152	24.9552
up	down	GO:0003777	MF	microtubule motor activity	7.08947e-13	1.59407e-10	13	81	163	21152	20.8268
up	down	GO:1990939	MF	ATP-dependent microtubule motor activity	4.43164e-06	0.00044684	6	46	163	21152	16.9261
up	down	GO:0003678	MF	DNA helicase activity	1.87524e-05	0.00167321	6	60	163	21152	12.9767
up	down	GO:0003774	MF	motor activity	3.15331e-10	5.25202e-08	13	130	163	21152	12.9767
up	down	GO:0008017	MF	microtubule binding	2.97854e-16	1.13513e-13	22	237	163	21152	12.0459
up	down	GO:0016538	MF	cyclin-dependent protein serine/threonine kinase regulator activity	0.000417917	0.0270803	4	45	163	21152	11.5348
up	down	GO:0008094	MF	DNA-dependent ATPase activity	3.7086e-06	0.000377577	8	99	163	21152	10.4862
up	down	GO:0015631	MF	tubulin binding	1.53093e-14	4.84829e-12	23	333	163	21152	8.96288
up	down	GO:0140097	MF	catalytic activity, acting on DNA	7.22778e-07	8.73745e-05	11	187	163	21152	7.63335
up	down	GO:0016887	MF	ATPase activity	2.74008e-11	5.009e-09	22	407	163	21152	7.01443
up	down	GO:0017111	MF	nucleoside-triphosphatase activity	4.69226e-07	5.76533e-05	22	739	163	21152	3.86315
up	down	GO:0019901	MF	protein kinase binding	2.00731e-06	0.000221247	21	719	163	21152	3.79013
up	down	GO:0008092	MF	cytoskeletal protein binding	2.24791e-08	3.26092e-06	28	959	163	21152	3.78881
up	down	GO:0019900	MF	kinase binding	7.3636e-07	8.85404e-05	23	799	163	21152	3.73547
up	down	GO:0016462	MF	pyrophosphatase activity	1.17027e-06	0.000134252	22	790	163	21152	3.61376
up	down	GO:0016817	MF	hydrolase activity, acting on acid anhydrides	1.21202e-06	0.000137638	22	793	163	21152	3.60009
up	down	GO:0016818	MF	hydrolase activity, acting on acid anhydrides, in phosphorus-containing anhydrides	1.21202e-06	0.000137638	22	793	163	21152	3.60009
up	down	GO:0004672	MF	protein kinase activity	0.00014281	0.010292	16	595	163	21152	3.48953
up	down	GO:0005524	MF	ATP binding	9.51503e-09	1.44558e-06	36	1372	163	21152	3.40496
up	down	GO:0032559	MF	adenyl ribonucleotide binding	2.35682e-08	3.37536e-06	36	1433	163	21152	3.26002
up	down	GO:0030554	MF	adenyl nucleotide binding	2.70417e-08	3.82411e-06	36	1444	163	21152	3.23519
up	down	GO:0016773	MF	phosphotransferase activity, alcohol group as acceptor	0.000249345	0.0168364	17	693	163	21152	3.18331
up	down	GO:0016301	MF	kinase activity	0.000187794	0.0130566	18	752	163	21152	3.10612
up	down	GO:0008144	MF	drug binding	2.91273e-07	3.67936e-05	36	1617	163	21152	2.88906
up	down	GO:0035639	MF	purine ribonucleoside triphosphate binding	8.1276e-07	9.66926e-05	36	1689	163	21152	2.7659
up	down	GO:0016772	MF	transferase activity, transferring phosphorus-containing groups	0.000441836	0.0282812	19	902	163	21152	2.73345
up	down	GO:0032555	MF	purine ribonucleotide binding	1.87132e-06	0.000207274	36	1760	163	21152	2.65432
up	down	GO:0017076	MF	purine nucleotide binding	2.10968e-06	0.000231396	36	1772	163	21152	2.63635
up	down	GO:0032553	MF	ribonucleotide binding	2.27092e-06	0.000244314	36	1776	163	21152	2.63041
up	down	GO:0000166	MF	nucleotide binding	3.54053e-06	0.000363511	38	1999	163	21152	2.4668
up	down	GO:1901265	MF	nucleoside phosphate binding	3.54053e-06	0.000363511	38	1999	163	21152	2.4668
up	down	GO:0097367	MF	carbohydrate derivative binding	1.94002e-05	0.00172416	37	2074	163	21152	2.31503
up	down	GO:0019899	MF	enzyme binding	6.24672e-05	0.00498076	38	2293	163	21152	2.15052
up	down	GO:0036094	MF	small molecule binding	4.24485e-05	0.00354816	39	2376	163	21152	2.13001
up	down	GO:0043168	MF	anion binding	0.000573642	0.0358287	39	2640	163	21152	1.91701
up	down	GO:0005515	MF	protein binding	1.21389e-05	0.00112786	98	8689	163	21152	1.46359
up	down	GO:0005488	MF	binding	0.00108979	0.0639485	122	12816	163	21152	1.2353
down	up	GO:0030881	MF	beta-2-microglobulin binding	2.96003e-11	2.37701e-08	5	11	61	21152	157.615
down	up	GO:0062061	MF	TAP complex binding	3.76455e-09	1.96851e-06	4	9	61	21152	154.113
down	up	GO:0046977	MF	TAP binding	1.00959e-08	4.54012e-06	4	11	61	21152	126.092
down	up	GO:0042610	MF	CD8 receptor binding	9.46293e-09	4.34233e-06	4	11	61	21152	126.092
down	up	GO:0042608	MF	T cell receptor binding	2.93447e-10	1.92197e-07	5	16	61	21152	108.361
down	up	GO:0042605	MF	peptide antigen binding	0	0	8	35	61	21152	79.2581
down	up	GO:0003823	MF	antigen binding	0	0	8	57	61	21152	48.6672
down	up	GO:0042277	MF	peptide binding	2.35168e-08	9.97688e-06	9	289	61	21152	10.7986
down	up	GO:0033218	MF	amide binding	8.71711e-09	4.08342e-06	10	353	61	21152	9.82306
down	up	GO:0001217	MF	DNA-binding transcription repressor activity	0.000275076	0.0631132	5	238	61	21152	7.28475
down	up	GO:0001227	MF	DNA-binding transcription repressor activity, RNA polymerase II-specific	0.000275076	0.0631132	5	238	61	21152	7.28475
down	up	GO:0000978	MF	RNA polymerase II cis-regulatory region sequence-specific DNA binding	0.000431751	0.0915841	7	567	61	21152	4.28091
down	up	GO:0000981	MF	DNA-binding transcription factor activity, RNA polymerase II-specific	0.000465016	0.0968138	8	761	61	21152	3.64525
down	up	GO:0005102	MF	signaling receptor binding	0.000211301	0.051087	12	1594	61	21152	2.61044
up	up	GO:0030235	MF	nitric-oxide synthase regulator activity	0.000210152	0.00638549	4	8	1036	21152	10.2085
up	up	GO:0015037	MF	peptide disulfide oxidoreductase activity	5.04011e-07	3.21039e-05	7	14	1036	21152	10.2085
up	up	GO:0004298	MF	threonine-type endopeptidase activity	1.29621e-09	1.57542e-07	10	21	1036	21152	9.72238
up	up	GO:0070003	MF	threonine-type peptidase activity	1.29621e-09	1.57542e-07	10	21	1036	21152	9.72238
up	up	GO:0046935	MF	1-phosphatidylinositol-3-kinase regulator activity	1.04689e-05	0.000477471	6	13	1036	21152	9.42323
up	up	GO:0005384	MF	manganese ion transmembrane transporter activity	0.00274728	0.0509675	3	7	1036	21152	8.75014
up	up	GO:0005138	MF	interleukin-6 receptor binding	0.00239969	0.045765	3	7	1036	21152	8.75014
up	up	GO:0071723	MF	lipopeptide binding	0.00239417	0.0457178	3	7	1036	21152	8.75014
up	up	GO:0008009	MF	chemokine activity	7.69365e-14	2.79019e-11	16	40	1036	21152	8.1668
up	up	GO:0070008	MF	serine-type exopeptidase activity	0.00387178	0.0679072	3	8	1036	21152	7.65637
up	up	GO:0050786	MF	RAGE receptor binding	0.00117316	0.0260399	3	8	1036	21152	7.65637
up	up	GO:0004017	MF	adenylate kinase activity	0.00528198	0.0854427	3	9	1036	21152	6.80566
up	up	GO:0034987	MF	immunoglobulin receptor binding	0.00476419	0.0796187	3	9	1036	21152	6.80566
up	up	GO:0003756	MF	protein disulfide isomerase activity	0.000334061	0.00933087	5	15	1036	21152	6.80566
up	up	GO:0016864	MF	intramolecular oxidoreductase activity, transposing S-S bonds	0.000334061	0.00933087	5	15	1036	21152	6.80566
up	up	GO:0035014	MF	phosphatidylinositol 3-kinase regulator activity	9.33478e-05	0.00318501	6	18	1036	21152	6.80566
up	up	GO:0051920	MF	peroxiredoxin activity	0.00617947	0.095495	3	10	1036	21152	6.1251
up	up	GO:0016814	MF	hydrolase activity, acting on carbon-nitrogen (but not peptide) bonds, in cyclic amidines	1.18139e-05	0.000530209	8	27	1036	21152	6.04948
up	up	GO:0016646	MF	oxidoreductase activity, acting on the CH-NH group of donors, NAD or NADP as acceptor	0.000581428	0.0146892	5	17	1036	21152	6.005
up	up	GO:0071617	MF	lysophospholipid acyltransferase activity	0.00246789	0.0465135	4	14	1036	21152	5.83343
up	up	GO:0140318	MF	protein transporter activity	0.00182396	0.0372496	4	14	1036	21152	5.83343
up	up	GO:0008320	MF	protein transmembrane transporter activity	0.00182396	0.0372496	4	14	1036	21152	5.83343
up	up	GO:0042288	MF	MHC class I protein binding	0.000764358	0.0183226	5	18	1036	21152	5.67139
up	up	GO:0043024	MF	ribosomal small subunit binding	0.00310957	0.0565685	4	15	1036	21152	5.44453
up	up	GO:0015036	MF	disulfide oxidoreductase activity	2.96433e-06	0.00015683	10	39	1036	21152	5.23513
up	up	GO:0042379	MF	chemokine receptor binding	7.14726e-11	1.20832e-08	16	63	1036	21152	5.18527
up	up	GO:0030228	MF	lipoprotein particle receptor activity	0.00465439	0.0782753	4	16	1036	21152	5.10425
up	up	GO:0140272	MF	exogenous protein binding	0.00107918	0.0243437	5	20	1036	21152	5.10425
up	up	GO:0001618	MF	virus receptor activity	0.00107918	0.0243437	5	20	1036	21152	5.10425
up	up	GO:0005200	MF	structural constituent of cytoskeleton	4.84555e-08	4.03527e-06	15	63	1036	21152	4.86119
up	up	GO:0022884	MF	macromolecule transmembrane transporter activity	0.00426402	0.0729754	4	17	1036	21152	4.804
up	up	GO:1904680	MF	peptide transmembrane transporter activity	0.000773585	0.0184847	6	27	1036	21152	4.53711
up	up	GO:0030515	MF	snoRNA binding	0.00198192	0.0396716	5	23	1036	21152	4.43848
up	up	GO:0048020	MF	CCR chemokine receptor binding	2.61091e-06	0.00014011	9	43	1036	21152	4.27332
up	up	GO:0016667	MF	oxidoreductase activity, acting on a sulfur group of donors	1.15541e-05	0.000519767	11	54	1036	21152	4.15902
up	up	GO:0016879	MF	ligase activity, forming carbon-nitrogen bonds	0.000144158	0.00465716	9	46	1036	21152	3.99463
up	up	GO:0016860	MF	intramolecular oxidoreductase activity	0.000106799	0.00359488	9	46	1036	21152	3.99463
up	up	GO:0005537	MF	mannose binding	0.00374241	0.0662583	5	26	1036	21152	3.92634
up	up	GO:0016504	MF	peptidase activator activity	0.00213753	0.0416106	6	32	1036	21152	3.82819
up	up	GO:0016645	MF	oxidoreductase activity, acting on the CH-NH group of donors	0.00556169	0.0884403	5	27	1036	21152	3.78092
up	up	GO:0005164	MF	tumor necrosis factor receptor binding	0.00213671	0.0416106	6	33	1036	21152	3.71218
up	up	GO:0051082	MF	unfolded protein binding	3.43668e-07	2.29299e-05	17	94	1036	21152	3.69243
up	up	GO:0016776	MF	phosphotransferase activity, phosphate group as acceptor	0.000339626	0.0094511	8	45	1036	21152	3.62969
up	up	GO:0042887	MF	amide transmembrane transporter activity	0.0016579	0.0343892	7	41	1036	21152	3.48583
up	up	GO:0048029	MF	monosaccharide binding	1.30678e-05	0.00058069	14	85	1036	21152	3.3628
up	up	GO:0016830	MF	carbon-carbon lyase activity	0.00115745	0.0258097	8	50	1036	21152	3.26672
up	up	GO:0019205	MF	nucleobase-containing compound kinase activity	0.00429449	0.0732638	6	38	1036	21152	3.22374
up	up	GO:0032813	MF	tumor necrosis factor receptor superfamily binding	0.0024613	0.0464585	7	45	1036	21152	3.17598
up	up	GO:0005125	MF	cytokine activity	3.656e-12	9.55874e-10	32	209	1036	21152	3.12605
up	up	GO:0003743	MF	translation initiation factor activity	0.00364057	0.0647195	7	47	1036	21152	3.04083
up	up	GO:0016209	MF	antioxidant activity	0.000122284	0.00403752	11	79	1036	21152	2.84287
up	up	GO:0009055	MF	electron transfer activity	0.000485681	0.0127576	9	65	1036	21152	2.82697
up	up	GO:0001540	MF	amyloid-beta binding	0.00300198	0.0550567	8	58	1036	21152	2.81614
up	up	GO:0005126	MF	cytokine receptor binding	5.73238e-12	1.38594e-09	41	323	1036	21152	2.59163
up	up	GO:0015171	MF	amino acid transmembrane transporter activity	0.00430982	0.0734139	9	72	1036	21152	2.55212
up	up	GO:0043021	MF	ribonucleoprotein complex binding	4.25945e-05	0.00160694	18	144	1036	21152	2.55212
up	up	GO:0038024	MF	cargo receptor activity	0.00506034	0.0829456	9	74	1036	21152	2.48315
up	up	GO:0008135	MF	translation factor activity, RNA binding	0.00575349	0.0907612	9	77	1036	21152	2.3864
up	up	GO:0090079	MF	translation regulator activity, nucleic acid binding	0.00252199	0.0473742	11	95	1036	21152	2.36407
up	up	GO:0030246	MF	carbohydrate binding	2.84588e-07	1.95961e-05	31	268	1036	21152	2.36167
up	up	GO:0004222	MF	metalloendopeptidase activity	0.00467195	0.0785118	11	100	1036	21152	2.24587
up	up	GO:0001882	MF	nucleoside binding	4.77011e-07	3.06445e-05	38	366	1036	21152	2.1198
up	up	GO:0005525	MF	GTP binding	1.01127e-06	6.03143e-05	36	347	1036	21152	2.11819
up	up	GO:0031072	MF	heat shock protein binding	0.00237598	0.0454889	14	136	1036	21152	2.10175
up	up	GO:0016874	MF	ligase activity	0.00197633	0.0396716	15	146	1036	21152	2.09764
up	up	GO:0032550	MF	purine ribonucleoside binding	1.61325e-06	9.23001e-05	36	354	1036	21152	2.0763
up	up	GO:0016853	MF	isomerase activity	0.0013894	0.0299313	15	148	1036	21152	2.06929
up	up	GO:0032549	MF	ribonucleoside binding	1.98108e-06	0.000111084	36	357	1036	21152	2.05886
up	up	GO:0016810	MF	hydrolase activity, acting on carbon-nitrogen (but not peptide) bonds	0.00257978	0.0483386	13	129	1036	21152	2.05753
up	up	GO:0001883	MF	purine nucleoside binding	2.07578e-06	0.000115244	36	358	1036	21152	2.0531
up	up	GO:0001664	MF	G protein-coupled receptor binding	3.08107e-06	0.000161111	29	289	1036	21152	2.04876
up	up	GO:0002020	MF	protease binding	0.00289816	0.0533702	14	143	1036	21152	1.99887
up	up	GO:0016829	MF	lyase activity	0.000797862	0.018944	18	184	1036	21152	1.99731
up	up	GO:0019001	MF	guanyl nucleotide binding	4.35758e-06	0.000217251	36	369	1036	21152	1.9919
up	up	GO:0032561	MF	guanyl ribonucleotide binding	4.35758e-06	0.000217251	36	369	1036	21152	1.9919
up	up	GO:0070851	MF	growth factor receptor binding	0.00350823	0.0628546	14	146	1036	21152	1.95779
up	up	GO:0044325	MF	ion channel binding	0.00607347	0.0940017	13	136	1036	21152	1.95162
up	up	GO:0031625	MF	ubiquitin protein ligase binding	0.00010907	0.00365502	28	300	1036	21152	1.90559
up	up	GO:0019207	MF	kinase regulator activity	0.00242938	0.0461746	17	187	1036	21152	1.85609
up	up	GO:0044389	MF	ubiquitin-like protein ligase binding	0.000129095	0.00423482	29	319	1036	21152	1.85609
up	up	GO:0008514	MF	organic anion transmembrane transporter activity	0.00357506	0.0637977	18	202	1036	21152	1.81934
up	up	GO:0003924	MF	GTPase activity	0.000538452	0.013867	25	285	1036	21152	1.79096
up	up	GO:0048018	MF	receptor ligand activity	6.17413e-07	3.82439e-05	40	475	1036	21152	1.71933
up	up	GO:0030546	MF	signaling receptor activator activity	8.96212e-07	5.43162e-05	40	481	1036	21152	1.69788
up	up	GO:0042277	MF	peptide binding	0.00275563	0.0510602	23	289	1036	21152	1.62488
up	up	GO:0030545	MF	receptor regulator activity	4.24982e-06	0.000212822	40	508	1036	21152	1.60764
up	up	GO:0004175	MF	endopeptidase activity	0.000277333	0.0080152	34	437	1036	21152	1.58851
up	up	GO:0061134	MF	peptidase regulator activity	0.00410597	0.0706372	18	232	1036	21152	1.58408
up	up	GO:0033218	MF	amide binding	0.00217366	0.0421334	27	353	1036	21152	1.56164
up	up	GO:0042802	MF	identical protein binding	5.31877e-12	1.29992e-09	141	1869	1036	21152	1.54029
up	up	GO:0042803	MF	protein homodimerization activity	1.13289e-05	0.000512538	68	936	1036	21152	1.48329
up	up	GO:0005102	MF	signaling receptor binding	5.05555e-10	7.06049e-08	115	1594	1036	21152	1.47299
up	up	GO:0044877	MF	protein-containing complex binding	2.12373e-06	0.000117327	87	1232	1036	21152	1.44178
up	up	GO:0016491	MF	oxidoreductase activity	8.1624e-05	0.00283228	54	765	1036	21152	1.4412
up	up	GO:0030234	MF	enzyme regulator activity	4.47535e-05	0.00167714	65	943	1036	21152	1.40732
up	up	GO:0070011	MF	peptidase activity, acting on L-amino acid peptides	0.00160751	0.0336232	41	606	1036	21152	1.38135
up	up	GO:0008233	MF	peptidase activity	0.0020306	0.0399458	42	632	1036	21152	1.35683
up	up	GO:0046983	MF	protein dimerization activity	1.15581e-05	0.000519767	92	1386	1036	21152	1.35524
up	up	GO:0017111	MF	nucleoside-triphosphatase activity	0.00218569	0.0423301	49	739	1036	21152	1.35377
up	up	GO:0005509	MF	calcium ion binding	0.00377229	0.0666824	40	606	1036	21152	1.34766
up	up	GO:0098772	MF	molecular function regulator	5.93681e-08	4.78455e-06	112	1699	1036	21152	1.34591
up	up	GO:0019899	MF	enzyme binding	4.96219e-08	4.10202e-06	150	2293	1036	21152	1.33561
up	up	GO:0019900	MF	kinase binding	0.0028578	0.0527567	52	799	1036	21152	1.32877
up	up	GO:0097367	MF	carbohydrate derivative binding	1.13627e-06	6.65338e-05	134	2074	1036	21152	1.31913
up	up	GO:0016462	MF	pyrophosphatase activity	0.00286023	0.0527581	51	790	1036	21152	1.31806
up	up	GO:0036094	MF	small molecule binding	8.93863e-08	7.00296e-06	153	2376	1036	21152	1.31473
up	up	GO:0017076	MF	purine nucleotide binding	1.89299e-05	0.000797714	114	1772	1036	21152	1.31351
up	up	GO:0016817	MF	hydrolase activity, acting on acid anhydrides	0.00302614	0.0553643	51	793	1036	21152	1.31307
up	up	GO:0016818	MF	hydrolase activity, acting on acid anhydrides, in phosphorus-containing anhydrides	0.00302614	0.0553643	51	793	1036	21152	1.31307
up	up	GO:0032555	MF	purine ribonucleotide binding	2.29049e-05	0.000936394	113	1760	1036	21152	1.31086
up	up	GO:0032553	MF	ribonucleotide binding	2.1431e-05	0.000882559	114	1776	1036	21152	1.31055
up	up	GO:0000166	MF	nucleotide binding	5.0127e-06	0.000243962	128	1999	1036	21152	1.30734
up	up	GO:1901265	MF	nucleoside phosphate binding	5.0127e-06	0.000243962	128	1999	1036	21152	1.30734
up	up	GO:0035639	MF	purine ribonucleoside triphosphate binding	4.67372e-05	0.00174276	108	1689	1036	21152	1.30553
up	up	GO:0003723	MF	RNA binding	0.00103501	0.0236027	65	1037	1036	21152	1.27975
up	up	GO:0016787	MF	hydrolase activity	4.32038e-07	2.80762e-05	149	2403	1036	21152	1.26597
up	up	GO:0043168	MF	anion binding	5.64561e-06	0.000271242	160	2640	1036	21152	1.23739
up	up	GO:0030554	MF	adenyl nucleotide binding	0.00385633	0.0677894	85	1444	1036	21152	1.20183
up	up	GO:0032559	MF	adenyl ribonucleotide binding	0.00458989	0.0773641	84	1433	1036	21152	1.19681
up	up	GO:0003824	MF	catalytic activity	7.77391e-12	1.78364e-09	325	5553	1036	21152	1.19494
up	up	GO:0005515	MF	protein binding	9.82245e-16	5.4843e-13	481	8689	1036	21152	1.13023
up	up	GO:0043167	MF	ion binding	4.05899e-05	0.00154166	284	5374	1036	21152	1.07898
up	up	GO:1901363	MF	heterocyclic compound binding	0.00081769	0.0193738	249	4860	1036	21152	1.04606
up	up	GO:0097159	MF	organic cyclic compound binding	0.00145643	0.0310112	251	4960	1036	21152	1.0332
up	up	GO:0005488	MF	binding	1.52679e-13	5.12387e-11	640	12816	1036	21152	1.01957
