# Supplementary material for: Microglia show differential transcriptomic response to Aβ peptide aggregates ex vivo and in vivo
Source: Life Sci Alliance. 2021 Jun 14;4(7):e202101108. doi: 10.26508/lsa.202101108 (PMC8321667; doi:10.26508/lsa.202101108)
Supplement: Supplementary file 22 [file LSA-2021-01108_TableS22.xlsx]

## Sheet: Sheet1
oAbeta, 12hr	fAbeta, 12hr	category	pathway_name	over_represented_pvalue	BHadjust	numDEInCat	numInCat	totalDEG	totalNum	enrichment
up	down	3030	DNA replication	0.000173858	0.00782361	4	35	163	6309	4.42349
up	down	4110	Cell cycle	0	0	14	124	163	6309	4.36998
up	down	4114	Oocyte meiosis	7.76948e-11	8.74066e-09	12	111	163	6309	4.18438
up	down	4914	Progesterone-mediated oocyte maturation	7.81e-08	5.8575e-06	9	87	163	6309	4.00402
up	down	3410	Base excision repair	0.00234522	0.0753822	3	34	163	6309	3.41519
up	down	4115	p53 signaling pathway	1.64497e-05	0.000925298	6	68	163	6309	3.41519
up	down	5322	Systemic lupus erythematosus	0.000863915	0.0323968	4	85	163	6309	1.82144
down	up	5330	Allograft rejection	9.80259e-09	1.4291e-06	6	49	61	6309	12.6644
down	up	5332	Graft-versus-host disease	1.27031e-08	1.4291e-06	6	51	61	6309	12.1678
down	up	100	Steroid biosynthesis	0.0020292	0.045657	2	18	61	6309	11.4918
down	up	4940	Type I diabetes mellitus	2.43837e-08	1.82877e-06	6	56	61	6309	11.0814
down	up	5320	Autoimmune thyroid disease	3.45007e-08	1.94067e-06	6	64	61	6309	9.69621
down	up	4612	Antigen processing and presentation	1.5155e-07	6.81976e-06	6	74	61	6309	8.38591
down	up	5416	Viral myocarditis	4.07629e-07	1.52861e-05	6	85	61	6309	7.30068
down	up	4145	Phagosome	1.28073e-06	4.11662e-05	7	167	61	6309	4.33523
down	up	4514	Cell adhesion molecules	9.43063e-06	0.000235766	6	145	61	6309	4.27971
down	up	4144	Endocytosis	8.30129e-06	0.000233474	7	214	61	6309	3.3831
up	up	3050	Proteasome	4.81826e-06	0.000183826	12	44	1036	6309	1.66085
up	up	4621	NOD-like receptor signaling pathway	1.23734e-06	9.28008e-05	15	56	1036	6309	1.63119
up	up	5144	Malaria	8.98979e-06	0.000259718	12	45	1036	6309	1.62394
up	up	670	One carbon pool by folate	0.00623812	0.0539838	5	19	1036	6309	1.60257
up	up	30	Pentose phosphate pathway	0.00130715	0.0196073	7	28	1036	6309	1.52244
up	up	5140	Leishmaniasis	4.90202e-06	0.000183826	15	64	1036	6309	1.42729
up	up	5143	African trypanosomiasis	0.00178152	0.0235789	7	31	1036	6309	1.37511
up	up	5323	Rheumatoid arthritis	4.08311e-06	0.000183826	17	81	1036	6309	1.2781
up	up	10	Glycolysis / Gluconeogenesis	0.000852229	0.0159793	11	59	1036	6309	1.13538
up	up	480	Glutathione metabolism	0.000750014	0.0153412	10	54	1036	6309	1.12773
up	up	4380	Osteoclast differentiation	9.2344e-06	0.000259718	21	116	1036	6309	1.10246
up	up	5150	Staphylococcus aureus infection	0.00256022	0.0303183	9	50	1036	6309	1.09616
up	up	4145	Phagosome	5.68401e-08	1.2789e-05	30	167	1036	6309	1.09397
up	up	4620	Toll-like receptor signaling pathway	7.15003e-05	0.00178751	17	101	1036	6309	1.02501
up	up	330	Arginine and proline metabolism	0.00565458	0.0508912	9	54	1036	6309	1.01496
up	up	5416	Viral myocarditis	0.000578379	0.0130135	14	85	1036	6309	1.00302
