# Supplementary material for: Microglia show differential transcriptomic response to Aβ peptide aggregates ex vivo and in vivo
Source: Life Sci Alliance. 2021 Jun 14;4(7):e202101108. doi: 10.26508/lsa.202101108 (PMC8321667; doi:10.26508/lsa.202101108)
Supplement: Supplementary file 24 [file LSA-2021-01108_TableS24.xlsx]

## Sheet: Sheet1
oAbeta, 12hr	fAbeta, 1hr	category	pathway_name	over_represented_pvalue	BHadjust	numDEInCat	numInCat	totalDEG	totalNum	enrichment
up	down	4974	Protein digestion and absorption	8.46718e-06	0.000952558	5	78	77	6309	5.25225
up	down	4512	ECM-receptor interaction	2.64885e-05	0.00198663	5	86	77	6309	4.76367
up	down	4110	Cell cycle	4.28065e-06	0.000952558	6	124	77	6309	3.9646
up	down	4914	Progesterone-mediated oocyte maturation	0.000321961	0.0181103	4	87	77	6309	3.76713
up	down	4114	Oocyte meiosis	0.000649595	0.0250158	4	111	77	6309	2.95261
up	down	5146	Amoebiasis	0.000667088	0.0250158	4	114	77	6309	2.87491
up	down	4510	Focal adhesion	0.00107491	0.0345506	5	198	77	6309	2.06907
up	up	4621	NOD-like receptor signaling pathway	1.84878e-06	0.000131898	12	56	641	6309	2.10909
up	up	3030	DNA replication	0.000369202	0.00830705	7	35	641	6309	1.96849
up	up	5144	Malaria	0.000279836	0.00699589	8	45	641	6309	1.74977
up	up	5323	Rheumatoid arthritis	1.89658e-06	0.000131898	14	81	641	6309	1.70116
up	up	4640	Hematopoietic cell lineage	2.34485e-06	0.000131898	14	81	641	6309	1.70116
up	up	5140	Leishmaniasis	3.29746e-05	0.00123655	11	64	641	6309	1.69167
up	up	5020	Prion disease	0.00212135	0.0251212	6	35	641	6309	1.68727
up	up	5143	African trypanosomiasis	0.00565681	0.0606087	5	31	641	6309	1.58749
up	up	10	Glycolysis / Gluconeogenesis	0.000482954	0.00919251	9	59	641	6309	1.50139
up	up	4620	Toll-like receptor signaling pathway	4.96377e-06	0.00022337	15	101	641	6309	1.46175
up	up	5222	Small cell lung cancer	0.000168001	0.00472504	12	85	641	6309	1.38952
up	up	4623	Cytosolic DNA-sensing pathway	0.00268757	0.0302352	7	55	641	6309	1.25267
up	up	4110	Cell cycle	0.00014207	0.00456654	15	124	641	6309	1.19062
up	up	4060	Cytokine-cytokine receptor interaction	1.52922e-08	3.44075e-06	29	243	641	6309	1.17461
up	up	4380	Osteoclast differentiation	0.00078561	0.0126259	13	116	641	6309	1.10303
up	up	4210	Apoptosis	0.00718725	0.07031	9	85	641	6309	1.04214
up	up	5146	Amoebiasis	0.00197451	0.0246814	12	114	641	6309	1.03605
up	up	5145	Toxoplasmosis	0.00156728	0.0220399	13	126	641	6309	1.01549
