# Supplementary material for: Microglia show differential transcriptomic response to Aβ peptide aggregates ex vivo and in vivo
Source: Life Sci Alliance. 2021 Jun 14;4(7):e202101108. doi: 10.26508/lsa.202101108 (PMC8321667; doi:10.26508/lsa.202101108)
Supplement: Supplementary file 25 [file LSA-2021-01108_TableS25.xlsx]

## Sheet: 1_GO_categories
fAbeta, 12hr	fAbeta, 1hr	category	ontology	term	over_represented_pvalue	BHadjust	numDEInCat	numInCat	totalDEG	totalNum	enrichment
down	down	GO:0008574	MF	ATP-dependent microtubule motor activity, plus-end-directed	0.000216282	0.0558977	6	26	549	21152	8.89113
down	down	GO:0003777	MF	microtubule motor activity	4.59298e-06	0.00206546	15	81	549	21152	7.13486
down	down	GO:0003774	MF	motor activity	0.000150095	0.0416651	16	130	549	21152	4.74194
down	down	GO:0008017	MF	microtubule binding	5.01832e-07	0.000322391	25	237	549	21152	4.06416
down	down	GO:0015631	MF	tubulin binding	8.40326e-06	0.00356504	27	333	549	21152	3.12391
down	down	GO:0016887	MF	ATPase activity	3.99926e-05	0.0136247	31	407	549	21152	2.93458
down	down	GO:0008092	MF	cytoskeletal protein binding	0.000204483	0.0547358	52	959	549	21152	2.08912
up	down	GO:0001730	MF	2'-5'-oligoadenylate synthetase activity	6.44909e-09	5.80031e-06	4	6	111	21152	127.039
up	down	GO:0070566	MF	adenylyltransferase activity	1.10414e-05	0.00459751	4	28	111	21152	27.2227
up	down	GO:0003725	MF	double-stranded RNA binding	7.91798e-05	0.0241978	5	84	111	21152	11.3428
up	down	GO:0003924	MF	GTPase activity	8.16142e-10	8.73855e-07	13	285	111	21152	8.69214
up	down	GO:0017111	MF	nucleoside-triphosphatase activity	9.59612e-07	0.000490383	16	739	111	21152	4.12576
up	down	GO:0016462	MF	pyrophosphatase activity	4.01325e-07	0.000227558	17	790	111	21152	4.10063
up	down	GO:0016817	MF	hydrolase activity, acting on acid anhydrides	4.14939e-07	0.000227558	17	793	111	21152	4.08511
up	down	GO:0016818	MF	hydrolase activity, acting on acid anhydrides, in phosphorus-containing anhydrides	4.14939e-07	0.000227558	17	793	111	21152	4.08511
down	up	GO:0001849	MF	complement component C1q complex binding	0.000620708	0.0596437	2	8	99	21152	53.4141
down	up	GO:0017116	MF	single-stranded DNA helicase activity	0.000165897	0.0250649	3	20	99	21152	32.0485
down	up	GO:0003678	MF	DNA helicase activity	0.000305588	0.0367441	4	60	99	21152	14.2438
down	up	GO:0070888	MF	E-box binding	0.0011403	0.0905994	3	47	99	21152	13.6377
down	up	GO:0005178	MF	integrin binding	3.71051e-06	0.00286041	7	122	99	21152	12.259
down	up	GO:0008081	MF	phosphoric diester hydrolase activity	0.00115927	0.0911405	4	86	99	21152	9.93751
down	up	GO:0050839	MF	cell adhesion molecule binding	0.000337189	0.0388311	7	235	99	21152	6.36424
down	up	GO:0000987	MF	cis-regulatory region sequence-specific DNA binding	3.39905e-05	0.00868497	12	582	99	21152	4.40529
down	up	GO:0001228	MF	DNA-binding transcription activator activity, RNA polymerase II-specific	0.000366242	0.0409699	9	440	99	21152	4.37025
down	up	GO:0001216	MF	DNA-binding transcription activator activity	0.000372315	0.0414431	9	441	99	21152	4.36034
down	up	GO:0000977	MF	RNA polymerase II transcription regulatory region sequence-specific DNA binding	1.90796e-06	0.00241015	16	796	99	21152	4.2946
down	up	GO:0000978	MF	RNA polymerase II cis-regulatory region sequence-specific DNA binding	0.000126047	0.0209939	11	567	99	21152	4.14501
down	up	GO:1990837	MF	sequence-specific double-stranded DNA binding	1.76408e-06	0.00241015	17	884	99	21152	4.10878
down	up	GO:0000976	MF	transcription regulatory region sequence-specific DNA binding	4.23556e-06	0.00288596	16	842	99	21152	4.05998
down	up	GO:0001067	MF	regulatory region nucleic acid binding	4.5559e-06	0.00301292	16	846	99	21152	4.04079
down	up	GO:0003690	MF	double-stranded DNA binding	5.28504e-06	0.00330095	17	964	99	21152	3.7678
down	up	GO:0000981	MF	DNA-binding transcription factor activity, RNA polymerase II-specific	8.9182e-05	0.0164365	13	761	99	21152	3.64985
down	up	GO:0008134	MF	transcription factor binding	0.000867831	0.0747631	11	704	99	21152	3.33838
down	up	GO:0043565	MF	sequence-specific DNA binding	3.1409e-05	0.0085088	17	1112	99	21152	3.26633
down	up	GO:0003700	MF	DNA-binding transcription factor activity	9.84675e-05	0.0173424	15	988	99	21152	3.24377
down	up	GO:0046914	MF	transition metal ion binding	0.000680652	0.0629813	13	944	99	21152	2.9423
down	up	GO:0140110	MF	transcription regulator activity	0.000866075	0.0747631	16	1335	99	21152	2.56068
down	up	GO:0003677	MF	DNA binding	6.83934e-05	0.0137306	23	1946	99	21152	2.52523
down	up	GO:0005102	MF	signaling receptor binding	0.000560048	0.0562174	17	1594	99	21152	2.27865
down	up	GO:0043169	MF	cation binding	0.000935273	0.0791399	31	3538	99	21152	1.87206
up	up	GO:0071723	MF	lipopeptide binding	0.000493221	0.0126487	3	7	605	21152	14.9837
up	up	GO:0005041	MF	low-density lipoprotein particle receptor activity	8.47574e-05	0.00275003	4	10	605	21152	13.9848
up	up	GO:0050786	MF	RAGE receptor binding	0.000227937	0.00647118	3	8	605	21152	13.1107
up	up	GO:0008009	MF	chemokine activity	4.70249e-16	1.48852e-13	15	40	605	21152	13.1107
up	up	GO:0034987	MF	immunoglobulin receptor binding	0.00100018	0.0230184	3	9	605	21152	11.654
up	up	GO:0051920	MF	peroxiredoxin activity	0.00130798	0.0289184	3	10	605	21152	10.4886
up	up	GO:0042379	MF	chemokine receptor binding	1.68485e-14	3.94623e-12	16	63	605	21152	8.87923
up	up	GO:0030228	MF	lipoprotein particle receptor activity	0.000634194	0.015653	4	16	605	21152	8.7405
up	up	GO:0048020	MF	CCR chemokine receptor binding	1.27845e-09	1.1362e-07	10	43	605	21152	8.13069
up	up	GO:0046935	MF	1-phosphatidylinositol-3-kinase regulator activity	0.00414758	0.0726878	3	13	605	21152	8.06815
up	up	GO:0008195	MF	phosphatidate phosphatase activity	0.00368714	0.0664838	3	13	605	21152	8.06815
up	up	GO:0017017	MF	MAP kinase tyrosine/serine/threonine phosphatase activity	0.00353141	0.0643467	3	13	605	21152	8.06815
up	up	GO:0046703	MF	natural killer cell lectin-like receptor binding	0.00333128	0.0618033	3	13	605	21152	8.06815
up	up	GO:0042288	MF	MHC class I protein binding	0.000873795	0.0203388	4	18	605	21152	7.76933
up	up	GO:0035325	MF	Toll-like receptor binding	0.00354618	0.0644087	3	14	605	21152	7.49185
up	up	GO:0033549	MF	MAP kinase phosphatase activity	0.00552662	0.0919477	3	15	605	21152	6.9924
up	up	GO:0005164	MF	tumor necrosis factor receptor binding	0.000120573	0.0037446	6	33	605	21152	6.35672
up	up	GO:0032813	MF	tumor necrosis factor receptor superfamily binding	9.61649e-05	0.00307577	7	45	605	21152	5.43853
up	up	GO:0005125	MF	cytokine activity	8.53456e-19	4.25088e-16	32	209	605	21152	5.35303
up	up	GO:0042287	MF	MHC protein binding	0.00515757	0.0871284	4	29	605	21152	4.82234
up	up	GO:0001540	MF	amyloid-beta binding	8.38681e-05	0.00272511	8	58	605	21152	4.82234
up	up	GO:0038024	MF	cargo receptor activity	1.80849e-05	0.00069039	10	74	605	21152	4.72459
up	up	GO:0016879	MF	ligase activity, forming carbon-nitrogen bonds	0.0010331	0.0237032	6	46	605	21152	4.56026
up	up	GO:0005200	MF	structural constituent of cytoskeleton	0.000162954	0.00483279	8	63	605	21152	4.43962
up	up	GO:0005126	MF	cytokine receptor binding	4.6034e-20	3.0567e-17	41	323	605	21152	4.4379
up	up	GO:0016209	MF	antioxidant activity	5.55525e-06	0.000234793	10	79	605	21152	4.42557
up	up	GO:0005044	MF	scavenger receptor activity	0.00538	0.0898065	5	44	605	21152	3.97295
up	up	GO:0016538	MF	cyclin-dependent protein serine/threonine kinase regulator activity	0.00476768	0.0818955	5	45	605	21152	3.88466
up	up	GO:0015179	MF	L-amino acid transmembrane transporter activity	0.00297884	0.0563799	6	56	605	21152	3.74593
up	up	GO:0004896	MF	cytokine receptor activity	0.000722335	0.0173523	9	96	605	21152	3.27769
up	up	GO:0009055	MF	electron transfer activity	0.00219518	0.0437964	6	65	605	21152	3.22726
up	up	GO:0016835	MF	carbon-oxygen lyase activity	0.0055409	0.0920141	6	67	605	21152	3.13092
up	up	GO:0070851	MF	growth factor receptor binding	6.27139e-05	0.00212368	13	146	605	21152	3.11305
up	up	GO:0001664	MF	G protein-coupled receptor binding	9.79169e-09	7.05661e-07	25	289	605	21152	3.02439
up	up	GO:0140375	MF	immune receptor activity	0.00215382	0.0430957	9	113	605	21152	2.78458
up	up	GO:0048018	MF	receptor ligand activity	4.61733e-12	6.65517e-10	37	475	605	21152	2.72335
up	up	GO:0030546	MF	signaling receptor activator activity	7.09621e-12	9.97239e-10	37	481	605	21152	2.68938
up	up	GO:0016616	MF	oxidoreductase activity, acting on the CH-OH group of donors, NAD or NADP as acceptor	0.0013704	0.0300033	10	133	605	21152	2.62872
up	up	GO:0030545	MF	receptor regulator activity	4.2645e-11	5.10039e-09	37	508	605	21152	2.54644
up	up	GO:0016614	MF	oxidoreductase activity, acting on CH-OH group of donors	0.0022524	0.0448188	10	142	605	21152	2.46211
up	up	GO:0002020	MF	protease binding	0.00274178	0.0527817	10	143	605	21152	2.44489
up	up	GO:0016829	MF	lyase activity	0.00195402	0.0399784	12	184	605	21152	2.28013
up	up	GO:0019207	MF	kinase regulator activity	0.00223565	0.0445249	12	187	605	21152	2.24355
up	up	GO:0005525	MF	GTP binding	6.57048e-05	0.00221163	22	347	605	21152	2.21661
up	up	GO:0031625	MF	ubiquitin protein ligase binding	0.000213544	0.0061244	19	300	605	21152	2.21426
up	up	GO:0044389	MF	ubiquitin-like protein ligase binding	0.000165755	0.00489006	20	319	605	21152	2.19197
up	up	GO:0032550	MF	purine ribonucleoside binding	8.76384e-05	0.00283941	22	354	605	21152	2.17278
up	up	GO:0032549	MF	ribonucleoside binding	9.96139e-05	0.00315912	22	357	605	21152	2.15452
up	up	GO:0001883	MF	purine nucleoside binding	0.000102496	0.00324138	22	358	605	21152	2.1485
up	up	GO:0001882	MF	nucleoside binding	0.000139268	0.00422026	22	366	605	21152	2.10154
up	up	GO:0030246	MF	carbohydrate binding	0.000849317	0.019955	16	268	605	21152	2.08728
up	up	GO:0019001	MF	guanyl nucleotide binding	0.000163025	0.00483279	22	369	605	21152	2.08445
up	up	GO:0032561	MF	guanyl ribonucleotide binding	0.000163025	0.00483279	22	369	605	21152	2.08445
up	up	GO:0005102	MF	signaling receptor binding	1.67438e-17	6.84516e-15	95	1594	605	21152	2.08368
up	up	GO:0042277	MF	peptide binding	0.00524807	0.0878606	15	289	605	21152	1.81464
up	up	GO:0016491	MF	oxidoreductase activity	8.85271e-05	0.00286407	36	765	605	21152	1.64527
up	up	GO:0098772	MF	molecular function regulator	1.42313e-09	1.23073e-07	79	1699	605	21152	1.62566
up	up	GO:0019900	MF	kinase binding	0.000346617	0.00932259	37	799	605	21152	1.61902
up	up	GO:0019901	MF	protein kinase binding	0.000841592	0.0198697	33	719	605	21152	1.60465
up	up	GO:0019899	MF	enzyme binding	1.47225e-07	8.05436e-06	96	2293	605	21152	1.46374
up	up	GO:0044877	MF	protein-containing complex binding	0.000426772	0.0112102	50	1232	605	21152	1.41891
up	up	GO:0042802	MF	identical protein binding	6.19667e-05	0.00210472	73	1869	605	21152	1.36556
up	up	GO:0035639	MF	purine ribonucleoside triphosphate binding	0.00380318	0.0680306	61	1689	605	21152	1.26269
up	up	GO:0032555	MF	purine ribonucleotide binding	0.00380088	0.0680306	63	1760	605	21152	1.25148
up	up	GO:0017076	MF	purine nucleotide binding	0.00438576	0.0763856	63	1772	605	21152	1.24301
up	up	GO:0032553	MF	ribonucleotide binding	0.00464268	0.0802388	63	1776	605	21152	1.24021
up	up	GO:0097367	MF	carbohydrate derivative binding	0.00232519	0.0460341	73	2074	605	21152	1.23058
up	up	GO:0000166	MF	nucleotide binding	0.00351448	0.0641942	70	1999	605	21152	1.22428
up	up	GO:1901265	MF	nucleoside phosphate binding	0.00351448	0.0641942	70	1999	605	21152	1.22428
up	up	GO:0005515	MF	protein binding	3.15833e-15	8.45418e-13	299	8689	605	21152	1.20309
up	up	GO:0043168	MF	anion binding	0.00260383	0.0504716	89	2640	605	21152	1.17864
up	up	GO:0036094	MF	small molecule binding	0.0056237	0.0931141	79	2376	605	21152	1.16246
up	up	GO:0003824	MF	catalytic activity	0.000381494	0.0101875	172	5553	605	21152	1.08292
up	up	GO:0005488	MF	binding	9.38713e-09	6.78681e-07	372	12816	605	21152	1.01481
