# Supplementary material for: Microglia show differential transcriptomic response to Aβ peptide aggregates ex vivo and in vivo
Source: Life Sci Alliance. 2021 Jun 14;4(7):e202101108. doi: 10.26508/lsa.202101108 (PMC8321667; doi:10.26508/lsa.202101108)
Supplement: Supplementary file 26 [file LSA-2021-01108_TableS26.xlsx]

## Sheet: Sheet1
fAbeta, 12hr	fAbeta, 1hr	category	pathway_name	over_represented_pvalue	BHadjust	numDEInCat	numInCat	totalDEG	totalNum	enrichment
up	down	5160	Hepatitis C	1.29502e-05	0.0029138	6	137	111	6309	2.48925
down	up	4710	Circadian rhythm	0.000718761	0.0808606	3	22	99	6309	8.69008
down	up	230	Purine metabolism	0.000609156	0.0808606	6	162	99	6309	2.36027
up	up	4621	NOD-like receptor signaling pathway	1.50788e-08	1.69637e-06	14	56	605	6309	2.60702
up	up	100	Steroid biosynthesis	0.00459172	0.0469607	4	18	605	6309	2.31736
up	up	5144	Malaria	3.59472e-06	0.000134802	10	45	605	6309	2.31736
up	up	5140	Leishmaniasis	4.49733e-07	2.52975e-05	13	64	605	6309	2.11821
up	up	5143	African trypanosomiasis	0.00067067	0.00838338	6	31	605	6309	2.01834
up	up	5323	Rheumatoid arthritis	9.34254e-07	4.20414e-05	14	81	605	6309	1.80239
up	up	10	Glycolysis / Gluconeogenesis	5.85611e-05	0.00131762	10	59	605	6309	1.76747
up	up	4620	Toll-like receptor signaling pathway	4.39581e-07	2.52975e-05	16	101	605	6309	1.65198
up	up	4640	Hematopoietic cell lineage	3.50874e-05	0.000877184	12	81	605	6309	1.5449
up	up	4623	Cytosolic DNA-sensing pathway	0.00035725	0.00515949	8	55	605	6309	1.51681
up	up	5020	Prion disease	0.00866612	0.0812449	5	35	605	6309	1.48973
up	up	51	Fructose and mannose metabolism	0.00993802	0.0860021	5	36	605	6309	1.44835
up	up	4380	Osteoclast differentiation	7.50651e-06	0.000211121	16	116	605	6309	1.43836
up	up	4060	Cytokine-cytokine receptor interaction	6.67467e-12	1.5018e-09	33	243	605	6309	1.41616
up	up	4210	Apoptosis	0.000361888	0.00515949	11	85	605	6309	1.34952
up	up	5150	Staphylococcus aureus infection	0.00903795	0.0813415	6	50	605	6309	1.25137
up	up	5142	Chagas disease	0.000366897	0.00515949	12	100	605	6309	1.25137
up	up	4630	JAK-STAT signaling pathway	6.50107e-06	0.000208963	18	153	605	6309	1.22684
up	up	4622	RIG-I-like receptor signaling pathway	0.0023445	0.0251197	8	69	605	6309	1.20905
up	up	5146	Amoebiasis	0.000351458	0.00515949	13	114	605	6309	1.18917
up	up	4660	T cell receptor signaling pathway	0.000850506	0.0100718	12	108	605	6309	1.15868
up	up	5145	Toxoplasmosis	0.000276927	0.00515949	14	126	605	6309	1.15868
up	up	5222	Small cell lung cancer	0.00558656	0.0546511	9	85	605	6309	1.10415
up	up	4062	Chemokine signaling pathway	7.76018e-05	0.00158731	18	177	605	6309	1.06048
