# Supplementary material for: Microglia show differential transcriptomic response to Aβ peptide aggregates ex vivo and in vivo
Source: Life Sci Alliance. 2021 Jun 14;4(7):e202101108. doi: 10.26508/lsa.202101108 (PMC8321667; doi:10.26508/lsa.202101108)
Supplement: Supplementary file 27 [file LSA-2021-01108_TableS27.xlsx]

## Sheet: 1_gene list
gene	cluster.num
Sytl3	13
Dnah6	13
Nrk	13
Elobl	13
Shroom3	13
Misp	13
Cd209g	13
Lamc2	13
Tspan8	13
Osbp2	13
4930506C21Rik	13
Rab17	13
Crybb1	13
Gm5073	13
Adgrg5	13
C6	13
Ankmy1	13
Slc2a10	13
Kcnh4	13
Gli3	13
Map3k13	13
Arhgef37	13
Tnfrsf17	13
1700028K03Rik	13
4930581F22Rik	12
Epb41l4aos	12
Chic1	12
Gpr141	12
Syt5	12
Mgp	12
Zfhx4	12
Fgf11	12
Plin4	12
Adam19	12
Gstm1	12
Peli1	12
C2	12
Arid5a	12
Ms4a6b	12
Ifi207	12
Arel1	12
Akr1e1	12
Tmcc3	12
Ddit3	12
Irf9	12
Gbp9	12
Mthfr	12
H2-T23	12
Ankle2	12
Ms4a4b	12
Cutc	12
Nectin4	12
4930599N23Rik	12
Oas1b	12
Olfr56	12
Etnk1	12
Gbp8	12
H2-T24	12
Csprs	12
Gm4951	12
Vnn3	12
F830016B08Rik	12
Fer1l6	12
Dnhd1	12
Zfp37	12
Hesx1	12
Pbld2	12
Nova2	12
D930048N14Rik	12
Raver2	12
Zfp109	12
Trim17	12
Zfp39	12
BC049715	12
Bco2	12
Mill2	12
5830444B04Rik	12
Nr3c1	12
Rab39	12
Flrt2	12
Chst15	12
Maf	12
Slc29a3	12
Tent5a	12
Lipe	12
Gm12185	12
Gstt1	12
Kat6a	12
Arid5b	12
Xrn1	12
Mtfp1	12
Stamos	12
Fgf9	12
Rab9	12
Plekhm2	12
Polg2	12
St5	12
Tmem220	12
Sirt3	12
Bmp2	12
Tmem35b	12
Oaz3	12
Cd5l	12
Cd4	12
Fabp5	12
Fcgr4	12
Lratd2	12
Fgd2	12
Arhgap17	12
Arid4a	12
Bbc3	12
Xkr6	12
Zkscan4	12
Zfp773	12
Slc15a4	12
Hs1bp3	12
Gtpbp8	12
Tfeb	12
Exd1	12
Tmem67	12
Ccdc166	12
Tlr9	12
Paqr9	12
Ednrb	12
Mfsd12	12
Hist3h2a	12
Tmppe	12
LTO1	12
Aftph	12
Lrrc61	12
Ern1	12
Tmem87a	12
Gm13710	12
Apba1	12
6530402F18Rik	12
AU041133	12
Mtcp1	12
Adra1a	12
Card14	12
C130036L24Rik	12
Klf15	12
Bcl9	12
Stx16	12
Trim41	12
Pde7b	12
Ms4a14	12
Nlgn2	12
Zfas1	12
Tmem116	12
Ahrr	12
Nfkbil1	12
Tas1r1	12
Ppp1r26	12
Slc16a4	12
Man2c1os	12
Mier3	12
H2-Aa	12
Nfe2l3	12
Cd177	12
Ctnnd2	12
4430402I18Rik	12
Gm15787	12
Ccr3	12
Treml2	12
Edaradd	12
Hsd17b1	12
Hspa2	12
Zfp595	12
Hist1h4k	12
Snhg20	12
Ankrd12	12
Dleu2	12
Oxld1	12
Zmym6	12
Bace1	12
Capn15	12
Car11	12
Zfp120	12
3110056K07Rik	12
Grik4	12
Rad9b	12
Zfp112	12
Lekr1	12
Ngrn	12
Zfp994	12
Slc16a9	12
Iffo2	12
Asb11	12
Aqp11	12
Clgn	4
Baiap2l2	4
Entpd3	4
Sel1l3	4
Tmem121b	4
Gpr19	4
Prox1	4
Ier5l	4
Frs3	4
Tspyl4	4
Kcp	4
Myh15	4
Dedd	4
Plcd3	4
Zbtb11os1	4
Gapdhs	4
Zc3h6	4
Shf	4
Grcc10	4
Cacna1g	4
Zfp651	4
Mpg	4
Cdhr4	4
Notch4	4
Ppm1l	4
Fchsd1	4
Abca5	4
Prkn	4
Icos	4
Rc3h1	4
Atxn1	4
4931422A03Rik	4
Ptch1	4
Ppard	4
Tlr5	4
Grk4	4
Oplah	4
Slc27a6	4
Arhgef9	4
Reck	4
Iqcb1	4
Zscan2	4
Il1r2	4
Dhtkd1	4
Lurap1	4
Mapk15	4
Prss36	4
Zbtb39	4
Pcdhb4	4
Zkscan2	4
Zap70	4
Ttyh1	4
0610009L18Rik	4
Tgfbr3l	4
Fcho1	4
Klhl35	4
Treml1	4
Ankrd42	4
Gm20604	4
2810454H06Rik	4
Ablim2	4
Aasdh	4
Capn11	4
E130102H24Rik	4
Fam126b	4
Smim1	4
Itpka	4
Amotl2	4
Cdr2l	4
Pfn2	4
Card6	4
Eps8	4
Snx30	4
Cyb5d2	4
Nfatc1	4
Fbxo10	4
Kcnab3	4
Cenpv	4
Hnmt	4
1700020I14Rik	4
Lratd1	4
Zfp874b	4
Syt3	4
Kank2	4
Zfp217	4
Tcf24	4
Neil2	4
Zfp760	4
Zfp964	4
Vps39	4
Bicral	4
Lysmd1	4
Cfap126	4
Zfp174	4
Crebl2	4
Rtl8c	4
Dlg3	4
Slc18a1	4
Moxd1	4
Prrg1	4
2900076A07Rik	4
Ccdc191	4
Zfp759	4
Apc	4
Arl4d	4
Ino80d	4
Mfsd11	4
Fnip2	4
Itm2b	4
Nacc2	4
Tsc22d3	4
St3gal4	4
Pla2g15	4
Gpr146	4
Mblac2	4
Tmem140	4
B3gnt8	4
Cblb	4
Tgfa	4
Crim1	4
Irak4	4
Bbx	4
Sbf2	4
Kmo	4
Gpr176	4
Fgd6	4
Unc13b	4
Mir339	4
Natd1	4
Armc2	4
Gng2	4
Ezh1	4
Tox2	4
Adi1	4
Sft2d2	4
Cyp27a1	4
Flcn	4
Dchs1	4
Bag4	4
Fam161b	4
2810414N06Rik	4
Smim24	4
Fancc	4
Etfbkmt	4
Mdfi	4
Ubald1	4
Grtp1	4
Srd5a1	4
2021-03-06	4
Pcnt	4
Proser3	4
Map3k12	4
Dzank1	4
P2ry13	4
Dgka	4
Plxdc2	4
Rwdd2a	4
Tesk2	4
C2cd3	4
Col4a3bp	4
Mindy2	4
Pik3c3	4
Ankmy2	4
Tle1	4
Rttn	4
Zmat3	4
Mafb	4
Il16	4
AI467606	4
Ssbp3	4
Tec	4
Gyg	4
Klhl6	4
Cmah	4
Tmod1	4
Snx32	4
Ptpn21	4
Spata2l	4
Abhd15	4
Eml6	4
Zfp354c	4
Scn3b	4
Vamp1	4
Tmem81	4
Ralgps2	4
Rgl3	4
Gm19582	4
Nbl1	4
Gm5544	4
Scarf2	4
Card11	4
Krba1	4
4930522L14Rik	4
Arl11	4
B230354K17Rik	4
Tmem150b	4
Slx1b	4
Gm12258	4
Ccpg1	4
Ccdc152	4
D330041H03Rik	4
Pde4a	4
Pcnx2	4
Cdan1	4
N4bp2l1	4
Hacd4	4
Gpr160	4
Lrp6	4
Cd300a	4
Stard8	4
Sord	4
Il6ra	4
Zfp157	4
Irf4	4
Zkscan14	4
Eya1	4
Cnksr3	4
Pparg	4
Snx33	4
Dnajc28	4
Foxo1	4
Cntnap1	4
Trpv4	4
Thap3	4
Snrk	4
Rnf227	4
Lrrc9	4
Gm16861	4
Dnase1	4
Ppp4r4	4
Brwd3	4
Slc22a18	4
Col6a6	4
Zfp58	4
5430405H02Rik	4
Vmn2r29	4
Syde1	4
Zbtb14	4
Amigo1	4
Dcdc2b	4
Efna1	4
Gm15441	4
P3h2	4
Ccdc171	4
Zfp84	4
Zfp30	4
Wdr38	4
Ggt5	4
Tnks1bp1	4
Arhgap27	4
Dclre1c	4
Rsrp1	4
Hpse	4
Osgin1	4
Slc35f5	4
Fcrl1	4
Pdgfc	4
Nudt16	4
Hist1h2be	4
Zfp397	4
Slc6a6	4
Acrbp	4
4732440D04Rik	4
Zfp729a	4
AW549877	4
Nupr1l	4
Tsc1	4
Ppwd1	4
Syt8	4
Tnks	4
Letm2	4
Syn2	4
Sgtb	4
Zfp236	4
Spen	4
Ccdc189	4
Gm16023	4
Tmc4	4
Usp11	4
Bmpr2	4
Tet2	4
BC005561	4
Tet3	4
Lrig2	4
Zfp113	4
Ppfia4	4
Dnase1l3	4
Wwox	4
Sugct	4
Mfap1b	4
Mfap1a	4
Xpc	4
Fam234a	4
Gm14461	4
Sgce	4
Tspan7	4
Cryba4	4
Adam33	4
Rubcnl	4
Atg14	4
Tbc1d4	4
Dhrs3	4
Sgsh	4
Crebrf	4
Soat1	4
Hpgds	4
Ndrg1	4
Slc26a11	4
Gnpda1	4
Cd300ld4	4
Cd300ld3	4
Cd300ld5	4
Dhx40	4
Mier1	4
Zfp652	4
Bbs1	4
Rasa3	4
Nfil3	4
Gstt3	4
Acad10	4
Aldh6a1	4
Khk	4
Scarb2	4
Rnf144b	4
Mib2	4
Rubcn	4
Ehd4	4
Entpd1	4
Socs6	4
Map3k1	4
Eef2k	4
Gpx3	4
C77080	4
Sema6d	4
Hgsnat	4
Ly86	4
Slc9a7	4
2410006H16Rik	4
Pex6	4
Gas5	4
Plpp6	4
Vipr1	4
Zfp629	4
BC002059	4
Zfp955b	4
Osbpl8	4
Sec31b	4
Erbin	4
Avl9	4
4930481A15Rik	4
Hist1h4i	4
Pik3ip1	4
Zfp358	4
Foxn3	4
Wasl	4
Hist2h3c2	4
Paxx	4
Arsg	4
Notch1	4
Map1lc3a	4
Zfp579	4
Tspan9	4
Stard10	4
Gigyf1	4
Epm2aip1	4
Kdm6a	4
Tceal1	4
Fbxo44	4
Sdr39u1	4
Zfp606	4
Epb41l5	4
Gabarapl1	4
Cacna1d	4
Pithd1	4
Oxr1	4
Tut4	4
Ttyh3	4
Dbp	4
2810013P06Rik	4
Rab34	4
Fbxl12	4
Pcp4l1	4
Nceh1	4
Inpp5k	4
Slc22a23	4
Syf2	4
Tmem50a	4
Gpnmb	4
Usp30	4
Ift122	4
Myorg	4
Egfl7	4
Apoc1	4
Apoc4	4
Kif19a	4
Sipa1l1	4
Tbx6	4
Tmem216	4
Zfp280d	4
Srl	4
Pacrg	4
2210011C24Rik	4
Zscan18	4
Ccdc39	4
Armc9	4
Sirpb1a	4
Fndc10	4
Rcbtb2	4
Arhgap6	4
Plppr3	4
Npl	4
Tspan13	4
Zdhhc14	4
Daglb	4
Pink1	4
Slco2b1	4
Mef2c	4
Fbxo32	4
Cxcr4	4
Laptm4b	4
Cela1	4
Borcs6	4
Clstn1	4
Tbc1d22a	4
Heca	4
Ctse	4
Ypel2	4
Ctdsp2	4
Nbr1	4
Map1lc3b	4
Oscp1	4
Bckdha	4
C5ar2	4
Slc2a8	4
Chp2	4
Rnf150	4
Ccr2	4
Dcaf8	4
Cbx7	4
Clk1	4
Hdac5	4
Ypel3	4
Cdip1	4
Ophn1	4
Pmp22	4
Adcy3	4
Cadm1	4
Sft2d1	4
Bcl2l11	4
Abhd12	4
Rftn1	4
Paox	4
Rgs10	4
Snx5	4
Lgmn	4
Ramp1	4
Sat1	4
Tgfbr2	4
Cd93	4
Gna12	4
Galc	4
Plekhg5	4
Trem2	4
Klhl21	4
Tcf4	4
Qk	4
Cttnbp2nl	4
Mertk	4
Antxr2	4
Naga	4
Slc17a5	4
Rnf167	4
Khnyn	4
Kifc2	4
Clk4	4
Ahr	4
Jaml	4
Cfap43	4
Macrod1	4
Gprc5c	4
Trf	4
Arhgef4	4
Ptprk	4
Cgn	4
Ddb2	4
Tmem94	4
Crtc3	4
Ercc5	4
Peg10	4
Adcy6	4
Abcb9	4
Zdhhc23	4
Zfp354b	4
Card10	4
Gdf3	4
Lrrc56	4
Ccdc114	4
1810021B22Rik	4
Adam22	4
Mblac1	4
Zfp239	4
Lcorl	4
Plxna4	4
Mtss1	4
Kctd2	4
Zfyve28	4
Mthfs	4
Zbtb38	4
Tecpr1	4
Asb10	4
Klhl24	4
Zfp704	4
Kif13b	4
Kansl1	4
Fcho2	4
Ap1b1	4
Selenop	4
Plxnc1	4
Nrp1	4
Fcgrt	4
Tlr8	4
Naprt	4
Fnip1	4
Vxn	4
Nr3c2	4
Chd2	4
Lyl1	4
Zfp395	4
Ro60	4
Rmdn1	4
Ncoa1	4
Chd3	4
Bmyc	4
Phf1	4
Zfp945	4
Vmac	4
Zfp703	4
Zfyve21	4
Kiz	4
Mok	4
Gm1673	4
Zfp316	4
Usf2	4
Espn	4
Cdkn1c	4
Hey1	4
Dvl2	4
Hsd17b11	4
Zkscan5	4
Harbi1	4
Cage1	4
Nexn	4
Gm13238	4
Col4a3	4
Amy1	4
2810403D21Rik	4
Ccpg1os	4
Zc3h8	4
Mepce	4
Ggnbp1	4
Tmem240	4
Itgae	4
Pex11g	4
1700067K01Rik	4
Mir6374	4
Agbl3	4
A230050P20Rik	4
Zfp334	4
Zfp974	4
1500015A07Rik	4
2010001A14Rik	4
Amt	4
Zkscan7	4
Gm16124	4
Sfi1	4
9330151L19Rik	4
Gstt2	4
Evi2	4
Gprc5b	10
Rapgef6	10
Snhg15	10
Slc25a42	10
Rmnd1	10
Mrtfa	10
Atxn2	10
Prdm15	10
Mavs	10
Gon7	10
Slc40a1	10
Zfp710	10
Lpar5	10
Pik3r1	10
Usp32	10
Actr6	10
Heatr5b	10
L3mbtl3	10
Cavin2	10
Foxo3	10
Kantr	10
Rnf169	10
Fam120c	10
Phf8	10
Chmp4c	10
Herc1	10
Pkd1	10
Zzef1	10
Ash1l	10
Zfhx3	10
Ttbk2	10
Sipa1l3	10
Dync2h1	10
Gabpb2	10
Zfc3h1	10
Mast4	10
Dop1a	10
Ylpm1	10
Notch2	10
Bahcc1	10
Elmod3	10
Zfp638	10
C87436	10
Arhgap12	10
Kitl	10
Cd200r1	10
Frmd4b	10
Dzip3	10
Uhrf2	10
Sash3	10
Susd1	10
Zfp467	10
Tmem126b	10
4930589L23Rik	10
Scrn3	10
Esr1	10
Rnasel	10
Tnfaip8l2	10
Igfbp4	10
Cep68	10
D3Ertd751e	10
Tlr7	10
Rab3il1	10
Pld4	10
Fam222a	10
Tbc1d31	10
Zfyve26	10
Lmbrd2	10
Gga3	10
Srek1	10
Zfp583	10
Shroom2	10
Mrm2	10
Slc18a2	10
Timm10b	10
Fam117a	10
Pomgnt2	10
Mgme1	10
P2rx7	10
Atf7	10
Ncoa3	10
Pgap1	10
Rreb1	10
Ncoa6	10
Ep300	10
Fam53b	10
Hlx	10
Trmt1l	10
Fyco1	10
Thap11	10
Gapvd1	10
Trim65	10
Pip4k2a	10
Stard5	10
4931414P19Rik	10
Shld1	10
Rom1	10
Adat1	10
Fahd1	10
Zfhx2	10
Pex26	10
Zfp947	10
Osmr	10
Slc39a12	10
Mterf1b	10
Zfp963	10
Zfp346	10
Pkd2l2	10
Purg	10
Kcnn1	10
Upf2	10
Tgm4	10
Fam185a	10
Sfxn5	10
Mga	10
Nrg2	10
B130006D01Rik	10
Kcnq1ot1	10
Snapc3	10
Szt2	10
Sh3yl1	10
Napb	10
Ift172	10
C920021L13Rik	10
Parp4	10
Tnrc6b	10
Syne2	10
Helz	10
Trrap	10
Wdr7	10
Shprh	10
Atf7ip	10
Stard9	10
Slc16a7	10
Kmt2c	10
Atp8a1	10
Setdb1	10
Kdm4c	10
Insr	10
Fam193a	10
Ahnak2	10
Nipbl	10
Cltc	10
Zcchc14	10
A930005H10Rik	10
Rere	10
Gtf2i	10
3300002I08Rik	10
2700049A03Rik	10
Ppp1r3c	10
Phxr4	10
Chd6	10
Zbtb20	10
Nbeal1	10
Ubn2	10
Bod1l	10
Cep95	10
Jmjd1c	10
Cspp1	10
Zscan26	10
Zc3h11a	10
Lncpint	10
Inpp5j	10
Snx29	10
Ikzf2	10
Raph1	10
Kmt2a	10
Dnmbp	10
Bptf	10
4932438A13Rik	10
Ankhd1	10
Dmxl1	10
Setd1b	10
Kmt2d	10
Wdfy3	10
Wnk1	10
Celf3	10
4930480K23Rik	10
Tmem47	10
Dand5	10
Bicra	10
Ttll3	10
Olfr110	10
Tle2	10
Senp7	10
Ptpn18	10
Zfp444	10
Sh3pxd2a	10
Kcnip4	10
Phlpp2	10
Usf3	10
Dapp1	10
Plekhm1	10
Txnip	10
Pde2a	10
Aagab	10
Sesn1	10
Ubr2	10
Cul9	10
Nfatc2	10
Pias1	10
Dip2b	10
Kdm3b	10
Sorbs3	10
Tjp3	10
Phf21a	10
Rnase6	10
Ganc	10
Phc3	10
Rsf1	10
Slc5a3	10
4930405O22Rik	10
Tppp	10
Cdh10	10
Ipcef1	10
Car7	10
Rasgrp2	10
Atp8a2	10
Nrtn	10
Zswim5	10
Ppm1e	10
Abat	10
Prex2	10
Bex1	10
Cyp39a1	8
Dpysl3	8
Ptpn14	8
Fat1	8
Fam180a	8
Cyp26b1	8
Itga11	8
Prdm6	8
Efnb2	8
Acaca	8
Fbn1	8
Hyls1	8
Col6a1	8
Rcn3	8
Mrc2	8
Cdh11	8
Arhgap33	8
Rtkn2	8
Slco1c1	8
Slc35f1	8
Tmem98	8
Rbp1	8
Sox11	8
Ndrg2	8
Ptprf	8
Cxcl12	8
Islr	8
Efemp1	8
Igfbp6	8
Smtn	8
Alms1	8
Inka2	8
Ttll5	8
1700012D01Rik	8
Wwtr1	8
Aph1b	8
Hspb1	8
Cep19	8
Thbs2	8
Mmp16	8
Palb2	8
Abhd18	8
Ctdspl	8
Igfbp2	8
Msh2	8
Tmem71	8
Epha2	8
Nid2	8
Sort1	8
Nanos1	8
Stmn1	8
Ncapg2	8
Lsp1	8
Rassf5	8
Col14a1	8
Aldh9a1	8
Mis18a	8
Selplg	8
2810025M15Rik	8
Alox15	8
Atp1a3	8
Afap1l1	8
Qpct	8
Cep128	8
Unc5a	8
Neil3	8
Cd163	8
Msrb2	8
Farp1	8
4930579G24Rik	8
Depdc1b	8
Ncaph	8
Msh6	8
Adgre5	8
Cdkn2c	8
Ccdc34	8
Sall1	8
Kifc5b	8
Kif14	8
Ccdc18	8
Myo5b	8
Prrg4	8
Pdgfrb	8
Myl9	8
Ccdc15	8
Echdc2	8
Hist1h3d	8
Fam43a	8
Itgb3	8
Slco1a5	8
Ccn2	8
Ccn1	8
Slc19a2	8
Ccdc80	8
Cenpo	8
Rarb	8
1700025G04Rik	8
F630028O10Rik	8
Fbln5	8
Zfp286	8
Parva	8
Ncam1	8
Tinagl1	8
Dmd	8
Cxadr	8
Il1r1	8
Fancb	8
Ankrd29	8
Fhl1	8
Flnc	8
Zfp273	8
Rab19	8
Vgll3	8
Meis1	8
Clec10a	8
Apc2	8
Rab3a	8
Zfp169	8
Txlng	8
Wdcp	8
Zfp108	8
Ahdc1	8
Fgd4	8
Dennd4c	8
Hist2h4	8
E030030I06Rik	8
Mettl18	8
Abcg3	8
1810034E14Rik	8
Fv1	8
Zfp970	8
Macf1	8
Vps13c	8
Lama2	8
Hectd4	8
Phldb2	8
Insyn2b	8
Rpgrip1	8
Rassf7	8
Calhm2	8
Hykk	8
Derl3	8
Spry3	8
Qser1	8
Gpm6b	8
Rusc1	8
Bcas3os1	8
Paqr8	8
C030034L19Rik	8
Stxbp4	8
Wdr76	8
Tgfb1i1	8
Gria3	8
Mzf1	8
Shc4	8
6430550D23Rik	8
Bcl7a	8
4930533B01Rik	8
Tarsl2	8
Prkg1	8
Sptb	8
Gdf1	8
Pbx3	8
Rexo5	8
Mxra8	8
Minar1	8
Zfp398	8
Arvcf	8
Adgra2	8
Sell	8
C2cd5	8
Glul	8
Ephx1	8
Comt	8
Zmynd8	8
Rdh10	8
Suox	8
4930432K21Rik	8
Krt80	8
Nhsl2	8
Arhgap26	8
Adgrb2	8
Zfp101	8
Eya2	8
Iqgap2	8
Ripor1	8
Atg2b	8
Polk	8
Zhx3	8
Ccdc82	8
Cep97	8
Cdc42ep3	8
Nfam1	8
Angptl7	8
Uaca	8
Zfp772	8
Gm5150	8
Mfge8	8
Rhoh	8
Klhl42	8
Kcnj9	8
Spice1	8
Trp53bp1	8
Herc4	8
Clasp2	8
Cxcr3	8
Klhl9	8
Deptor	8
Slc12a6	8
Rnf141	8
Rps6ka5	8
Rbl2	8
Fhod3	8
B130034C11Rik	8
Dlc1	8
Gnai1	8
Nynrin	8
Zfp692	8
Cers4	8
Mtmr11	8
Zc3h12d	8
Brca2	8
Sesn3	2
Fndc4	2
Cep72	2
Gk5	2
Col24a1	2
Ambp	2
Fgd1	2
Bmp4	2
Gpr82	2
Tmie	2
Mpig6b	2
Tmtc1	2
Fam171a2	2
Gm19557	2
Stra6	2
Olfml1	2
Matn1	2
Foxp2	2
Npr3	2
Smoc2	2
Plcd4	2
Cd300lg	2
Itih2	2
C530008M17Rik	2
Clic6	2
Vat1l	2
Mybl1	2
Adgrl1	2
Srgap3	2
Ccdc102a	2
Myadml2	2
Rfx2	2
Afap1	2
Grik2	2
A430046D13Rik	2
Dnali1	2
Gcnt7	2
Il17rd	2
Ppm1j	2
Ager	2
Prr18	2
Srpk3	2
Efcab12	2
Prg4	2
Zscan25	2
B230216N24Rik	2
Cspg4	2
Zfp697	2
Sall3	2
Map4k1	2
Sdc2	2
Ppp1r13l	2
Syde2	2
Lrig3	2
Cgref1	2
Gm10825	2
1700003E16Rik	2
Lonrf2	2
Sema3a	2
Sema3d	2
Adamts5	2
Ildr2	2
Fmod	2
Galr2	2
Umodl1	2
Frat1	2
Nbea	2
Nim1k	2
Sigirr	2
Ptpn13	2
Slc36a2	2
Acot4	2
Aff3	2
Sytl2	2
Lum	2
Ablim1	2
Plcb1	2
Lrp2bp	2
Prr5	2
Abcb1a	2
Pik3c2b	2
Hist1h4m	2
2310034O05Rik	2
A430110L20Rik	2
Akr1c14	2
AU040972	2
Tslp	2
Prob1	2
Hook1	2
Snora43	2
Slc2a3	2
Tenm4	2
Sema4g	2
Fbxl16	2
Nav1	2
Plxnb3	2
Trerf1	2
Sptbn1	2
Lrp1	2
Adcy1	2
Lrrc4c	2
Cc2d2a	2
Thnsl2	2
Sall2	2
B630019K06Rik	2
Yes1	2
Samd14	2
Necab3	2
Bank1	2
Rad51b	2
Ccdc77	2
Ints6l	2
Mdm1	2
Mmp15	2
Tmem91	2
Gm16982	2
Igsf10	2
Hectd2os	2
Tmtc2	2
Tril	2
Dcun1d4	2
Tmem156	2
Fancm	2
Inhbb	2
Adamts12	2
Hormad2	2
Ccdc183	2
Fhdc1	2
Siglech	2
Kif21a	2
Vasn	2
Fkbp7	2
Asb4	2
Fry	2
Hist1h4n	2
Atp2b4	2
Col27a1	2
Ltbp4	2
Il18rap	2
Mutyh	2
Slc16a2	2
Gm11335	2
Ntn4	2
Ggact	2
Pcdhgc4	2
Patj	2
Bmp7	2
Csdc2	2
Aaas	2
Vsig10	2
2610035D17Rik	2
Srpx2	2
Nek5	2
Rcor2	2
Usp27x	2
Aspa	2
Rab44	2
Tns2	2
Hspb6	2
Fam161a	2
Mmgt2	2
Hdac8	2
Bcl2l14	2
Rab27a	2
2610044O15Rik8	2
Gpr137c	2
Lsr	2
Cntrob	2
Lbh	2
Prkag2	2
Mctp1	2
Hadh	2
Rassf3	2
Fyn	2
Maged1	2
Lyve1	2
Rnase4	2
Ccni	2
C5ar1	2
Rasal3	2
Prickle2	2
Cenpa	2
Map3k5	2
Adamts10	2
2900026A02Rik	2
Mical1	2
C130050O18Rik	2
Ccr1	2
Fuca1	2
Cdon	2
Fam171a1	2
Timp3	2
Nphp3	2
Wdr6	2
Hes1	2
Zfp608	2
Ppp1r3d	2
Mbd4	2
Rhebl1	2
Ubxn7	2
9430015G10Rik	2
Lpcat1	2
Serpine2	2
Arhgef6	2
Pros1	2
Crot	2
Kdm2b	2
Fkbp1b	2
Smpdl3a	2
Pcyox1	2
Dennd2c	2
Zfyve1	2
Idh1	2
Haus4	2
Glb1	2
Pde1c	2
Ak1	2
Vav3	2
Fbxo21	2
Mid1ip1	2
Tcaf1	2
Slc18b1	2
Hip1	2
Tmem154	2
Phka2	2
Helb	2
Svil	2
Ttc30b	2
Tfdp2	2
Prxl2c	2
Ppp1r3b	2
Eva1a	2
Tdp2	2
Cep44	2
Bhlhb9	2
Setd7	2
Zfp383	2
Dipk1b	2
Fgfr2	2
Lbx2	2
Wwc1	2
Lrg1	2
Rab11fip2	2
Zfp473	2
Rdm1	2
Adrb1	2
Nipal3	2
Vps37d	2
Acyp1	2
Ak8	2
Syne3	2
Fam189a2	2
Hid1	2
Sostdc1	2
F3	2
Tnfsf8	2
Klhl23	2
Sat2	2
Strbp	2
Plscr4	2
Crocc	2
Kcnma1	2
Gm15706	2
Inmt	2
Ctnnal1	2
Rapgefl1	2
Gm9733	2
Ndnf	2
Stat4	2
Ulk4	2
Abi3	2
Scai	2
Abca2	2
Bend4	2
Fat3	2
E330009J07Rik	2
Inpp1	2
Stab1	2
Specc1	2
Spint1	2
Fam221a	2
Ankrd34a	2
Zfp618	2
H2-DMa	2
Adarb1	2
Ica1	2
Fam20a	2
Fn1	2
Soga1	2
Pde4d	2
Plekhh2	2
Mlxipl	2
Zranb3	2
Tnfrsf23	2
Havcr2	2
Adam8	2
Pi16	2
Gpm6a	2
Zfp532	2
Rhoj	2
Cep170b	2
Jup	2
Ankrd37	2
Hdac9	2
Pear1	2
Htra3	2
Ptgs1	2
Acaa2	2
Mrvi1	2
Mfsd6	2
Il1rl1	2
Tifab	2
Tm6sf1	2
Cryl1	2
Fank1	2
Erich3	2
Aqp1	2
Lypd6	2
Casc1	2
Kbtbd11	2
Adamtsl3	2
Cpz	2
Ncam2	2
Efhb	2
Paqr4	2
Dennd5b	2
Stag3	2
Jag2	2
Lamc1	2
Tob1	2
Fbp1	2
Slc24a3	2
Cd34	2
Smad7	2
Asap3	2
Adam3	2
Mcam	2
Cyp4f18	2
Arsb	2
Il17ra	2
Thsd1	2
Fgf13	2
Mmd	2
Pxdc1	2
Cmtm8	2
F5	2
Nemp2	2
Tgfb3	2
Dmtn	2
Dock6	2
Dab2	2
Ypel1	2
Med23	2
Plcg1	2
Gramd1b	2
Dock4	2
Snx24	2
Emp1	2
Gcnt1	2
Mxi1	2
Tlr13	2
Lyzl4	2
Gpr183	2
Nrep	2
St3gal5	2
Cpeb2	2
Xylt1	2
Gcfc2	2
Peak1	2
Sardh	2
Nlrc3	2
Cbx2	2
Fam110a	2
Acot1	2
Rgs12	2
Dhrs9	2
Sfxn3	2
Mef2a	2
Ucp2	2
Npnt	2
Retreg1	2
Micall1	2
Chst10	2
Gdpd5	2
Rgs11	2
Klf9	2
Zfyve9	2
Mpzl1	2
Kif21b	2
Slc23a1	2
Snora28	2
Haao	2
Chst3	2
LOC102635948	2
Avpi1	2
Pxmp2	2
Snhg11	2
Pkd1l2	2
Mycbpap	2
Firre	2
Gpc2	2
Rilp	2
Dnajb13	2
Spred3	2
Map7	2
Klhl38	2
Ccdc17	2
Gabbr2	2
Prkab2	2
Tctn1	2
Fam160a2	2
Zfp182	2
Zfp791	2
P3h4	2
Hsf4	2
Tfap4	2
Pfkm	2
Nmb	2
Dusp18	2
Ankrd13b	2
Gm4788	2
Capn3	2
Kdsr	2
Magi3	2
Smim10l2a	2
Mid2	2
Slc9a3r2	2
L3hypdh	2
L2hgdh	2
Ggn	2
Gan	2
Hacl1	2
Dock9	2
Gm11992	2
Runx2	2
Bex3	2
Susd3	2
Kcnip3	2
Caprin2	2
Olfm1	2
Fgfrl1	2
Sema6c	2
Pnck	2
Lrrc39	2
Rtkn	2
Itgb7	2
Zfp949	2
Igf1r	2
Gab1	2
Tpcn1	2
Smyd3	2
Prtn3	2
A630072M18Rik	2
Arhgef25	2
Celsr2	2
Rbak	2
Zfp799	2
Dnmt3b	2
Clec2i	2
Cdk5r1	2
Sptbn5	2
Fap	2
Neurl1a	2
Wdr90	2
Ppox	2
Glis2	2
Tnik	2
Fbxl20	2
Atg16l2	2
Fam193b	2
Ssbp2	2
Jak3	2
Slc7a13	2
Tmem191c	2
Zfp219	2
Satb1	2
Rabl2	2
Kmt5c	2
Slc7a15	2
1600020E01Rik	2
Slc37a1	2
Rfx3	2
Tlcd1	2
Serhl	2
Abcc10	2
Bbs2	2
Pbx1	2
Uvssa	2
Il4	2
Slc25a27	2
Gm16206	2
Baz2b	2
Nav2	2
Gramd1c	2
Lmln	2
Fcrla	2
Mnt	2
Arl15	2
Bpifb4	2
Selenbp2	2
4933439C10Rik	2
Cercam	2
Ing3	2
Papolg	2
Mknk2	2
Pot1a	2
Leng8	2
Gm527	2
Lmbr1l	2
Polr3gl	2
Tal1	2
Lrrc27	2
Rhobtb1	2
Klhl3	2
Accs	2
Rnd2	2
Cldn12	2
Ddah2	2
Hgf	2
Fam117b	2
Smo	2
Irf2bpl	2
Htr2b	2
Rgs1	2
Ntpcr	2
Itgb5	2
Ccng2	2
Uhrf1bp1l	2
Spp1	2
Inpp5d	2
Ddx3x	2
Ank	2
S1pr1	2
Itgav	2
Bmp2k	2
Ivns1abp	2
Frmd6	2
Arl4c	2
Sox4	2
Irgq	2
Maml3	2
Paqr7	2
Tmem37	2
St6gal1	2
Enpp1	2
Klf11	2
Myom1	2
Mettl27	2
Inafm1	2
Izumo4	2
Smpd2	2
Nme4	2
Slc22a17	2
Ldb1	2
Ccdc163	2
Mfng	2
Glis3	2
Csnk1e	2
Syngr1	2
Tmem87b	2
Tbxas1	2
Nr1d1	2
Tcim	2
Ppcdc	2
Unkl	2
Dtx3	2
Auh	2
1110032A03Rik	2
Ttc28	2
Atg2a	2
Fcgr2b	2
Fbxo31	2
Pitpnc1	2
Gab2	2
Smim14	2
Hexb	2
Mef2d	2
Tpd52	2
1700017B05Rik	2
Fgf1	2
Rassf2	2
Acsf2	2
N4bp2	2
ND4	2
Ap4m1	2
Sgip1	2
Kat6b	2
Cpeb3	2
Ccp110	2
Cmbl	2
Zc3hav1l	2
Pou2f1	2
Camsap2	2
Lonrf3	2
Epb41	2
Thra	2
Wdr19	2
Cep120	2
Kdm3a	2
Wdpcp	2
Txndc16	2
Hbp1	2
Rap2a	2
Dyrk1b	2
Arhgap22	2
P2ry12	2
Acox3	2
Etl4	2
Sulf2	2
Itga6	2
Tcn2	2
F13a1	2
Slc7a4	2
Pde7a	2
Sbk2	2
Cdk19	2
Ube2h	2
Rab31	2
Tbc1d15	2
Hp1bp3	2
Tef	2
Colec12	2
Calcoco1	2
Vgll4	2
Peli2	2
Fcgr3	2
Enho	2
Gramd4	2
Pacs1	2
Pyroxd2	2
Ulk1	2
Tcp11l2	2
Reps2	2
Pdcd4	2
Ltc4s	2
Arap2	2
Tpbgl	2
Cbfa2t3	2
Irs2	2
Pqlc1	2
Fam214a	2
Rhod	2
Nphp4	2
Eda	2
Zfp2	2
2610008E11Rik	2
Il7r	2
Casp6	2
Mmp11	2
Eya4	2
Tnfsf12	2
Ino80dos	2
Scmh1	2
Lamb2	2
Rb1cc1	2
Lama3	2
Ssh2	2
Bbs9	2
Ppt1	2
Agmo	2
Ctc1	2
Abcd2	2
Slc39a8	2
H2afv	2
Cnr2	2
Tmem64	2
Mettl7a1	2
4833420G17Rik	2
Appl2	2
Ang	2
Mospd1	2
Lbp	2
Mr1	2
Arhgap25	2
Gpr34	2
Mtus1	2
Dennd5a	2
Paip2	2
Ahcyl2	2
Rmnd5a	2
Trp53inp1	2
Tcf12	2
Aatk	2
Iqsec1	2
Dhx32	2
Epas1	2
Man2b2	2
Rnf122	2
Svip	2
Rabgap1l	2
Abca6	2
Fer1l5	2
Fn3k	2
Stx17	2
Dclre1b	2
Rasgef1a	2
Gpr155	2
Engase	2
Otulinl	2
Fam110b	2
Casp2	2
Thbd	2
Rpain	2
Zfp354a	2
Dbndd2	2
Gab3	2
Plin2	2
Kctd12b	2
Angptl4	2
Cep131	2
Tctn3	2
Mrgpre	2
Nat8f1	2
Nadk2	2
Pank1	2
Fli1	2
Gas6	2
Serinc3	2
Ctsf	2
Man2b1	2
Hfe	2
Vsig4	2
Mamdc2	2
Myo5a	2
Abca9	2
Smarca2	2
Lpin1	2
Rab11fip5	2
Sh3bp5l	2
Rnf145	2
Man2a2	2
Hadhb	2
Sgpp1	2
Cfh	2
Lats2	2
Ago4	2
Nat8l	2
Ttc38	2
Zbtb16	2
Kynu	2
Tmlhe	2
Zfp12	2
Acad12	2
Unc119b	2
Rell1	2
Galnt9	2
Mindy4	2
Ston2	2
Bmpr1a	2
Vwf	2
Sfxn4	2
Zfand4	2
Kank3	2
4921507G05Rik	2
Pianp	2
4930473A02Rik	2
Tbc1d16	2
Plekhg3	2
Rfx1	2
Acvr2b	2
Phc1	2
Dedd2	2
Bcas3	2
Mxd4	2
Dgkd	2
Cxxc5	2
Sirpb1c	2
Arhgap18	2
Vsir	2
Arhgap45	2
Pan2	2
Abhd4	2
Sirpb1b	2
Serinc5	2
Wdr45	2
Nxpe5	2
Tln2	2
Ctsd	2
Hpgd	2
Serpinb6a	2
Tbl1xr1	2
Abl1	2
Ankrd44	2
Eif4ebp2	2
Zer1	2
Cd300lb	2
[truncated: 3,497 more rows]
