# Supplementary material for: Microglia show differential transcriptomic response to Aβ peptide aggregates ex vivo and in vivo
Source: Life Sci Alliance. 2021 Jun 14;4(7):e202101108. doi: 10.26508/lsa.202101108 (PMC8321667; doi:10.26508/lsa.202101108)
Supplement: Supplementary file 29 [file LSA-2021-01108_TableS29.xlsx]

## Sheet: Sheet1
cluster.number	category	pathway_name	over_represented_pvalue	BHadjust	numClusterGeneInCat	numInCat	numClusterGene	TotalGene	enrichment
1	3030	DNA replication	7.64583e-23	2.569e-20	19	36	463	1879	2.14189
1	3430	Mismatch repair	2.22782e-08	2.02793e-06	8	24	463	1879	1.35277
1	3440	Homologous recombination	8.82837e-08	7.38867e-06	8	28	463	1879	1.15952
1	4110	Cell cycle	1.45941e-24	5.46634e-22	31	124	463	1879	1.01458
3	3050	Proteasome	4.7951e-23	5.47792e-20	26	44	1106	1879	1.0039
5	785	Lipoic acid metabolism	0.0381916	0.872818	1	3	290	1879	2.15977
7	524	Butirosin and neomycin biosynthesis	0.00277338	0.0580277	2	4	491	1879	1.91344
9	533	Glycosaminoglycan biosynthesis - keratan sulfate	0.0113209	0.281765	2	15	243	1879	1.031
11	400	Phenylalanine, tyrosine and tryptophan biosynthesis	0.0041842	0.289699	2	6	374	1879	1.67469
11	100	Steroid biosynthesis	0.000206627	0.0531701	4	18	374	1879	1.11646
11	430	Taurine and hypotaurine metabolism	0.0114229	0.512352	2	10	374	1879	1.00481
13	5020	Prion diseases	0.0351322	1	1	35	24	1879	2.2369
13	4672	Intestinal immune network for IgA production	0.0439718	1	1	44	24	1879	1.77936
