# Supplementary material for: Microglia show differential transcriptomic response to Aβ peptide aggregates ex vivo and in vivo
Source: Life Sci Alliance. 2021 Jun 14;4(7):e202101108. doi: 10.26508/lsa.202101108 (PMC8321667; doi:10.26508/lsa.202101108)
Supplement: Supplementary file 30 [file LSA-2021-01108_TableS30.xlsx]

## Sheet: 1_Gene-Module Membership
ensembl	entrez	symbol	moduleColor	GS.fAβ.1hr	p.GS.fAβ.1hr	GS.fAβ.12hr	p.GS.fAβ.12hr	GS.oAβ.12hr	p.GS.OAβ.12hr
ENSMUSG00000035934	208076	Pknox2	antiquewhite4	0.670187	0.0170887	0.388934	0.211462	0.481866	0.112666
ENSMUSG00000025140	209027	Pycr1	antiquewhite4	0.808072	0.00147134	0.693232	0.0124267	0.775856	0.00301555
ENSMUSG00000029376	665563	Mthfd2l	antiquewhite4	0.81106	0.00136766	0.744572	0.00547243	0.696351	0.0118771
ENSMUSG00000022110	20916	Sucla2	antiquewhite4	0.868987	0.000242971	0.804309	0.00161044	0.768494	0.00349712
ENSMUSG00000017390	11676	Aldoc	antiquewhite4	0.974659	7.8877e-08	0.849431	0.000470669	0.855398	0.00038858
ENSMUSG00000032014	102644	Oaf	antiquewhite4	0.819797	0.0010964	0.755801	0.00446196	0.856372	0.000376316
ENSMUSG00000025192	93685	Entpd7	antiquewhite4	0.742409	0.00568541	0.693367	0.0124025	0.750507	0.00491902
ENSMUSG00000033554	69740	Dph5	antiquewhite4	0.913294	3.3318e-05	0.869225	0.00024087	0.895999	8.02837e-05
ENSMUSG00000039395	381269	Mreg	antiquewhite4	0.869327	0.000239981	0.985175	5.5004e-09	0.970532	1.66554e-07
ENSMUSG00000059734	225887	Ndufs8	antiquewhite4	0.994542	3.78102e-11	0.9533	1.61709e-06	0.985948	4.21457e-09
ENSMUSG00000001366	71538	Fbxo9	antiquewhite4	0.790096	0.00222872	0.733396	0.00664059	0.742545	0.00567182
ENSMUSG00000021022	59032	Ppp2r3c	antiquewhite4	0.828965	0.000858399	0.845437	0.000532711	0.853668	0.000411125
ENSMUSG00000051234	19823	Rnf7	antiquewhite4	0.851224	0.00044471	0.892361	9.47455e-05	0.793006	0.00208942
ENSMUSG00000031781	109006	Ciapin1	antiquewhite4	0.997024	1.8303e-12	0.950763	2.09766e-06	0.980041	2.41259e-08
ENSMUSG00000022905	16646	Kpna1	antiquewhite4	0.963379	4.87771e-07	0.907002	4.67822e-05	0.958372	9.17939e-07
ENSMUSG00000032349	68801	Elovl5	antiquewhite4	0.865155	0.000278765	0.83022	0.000829206	0.927252	1.41893e-05
ENSMUSG00000033272	67843	Slc35a4	antiquewhite4	0.94567	3.4019e-06	0.932202	1.00604e-05	0.923007	1.87051e-05
ENSMUSG00000024360	225363	Etf1	antiquewhite4	0.930471	1.13783e-05	0.958468	9.07509e-07	0.951097	2.02853e-06
ENSMUSG00000006315	69804	Tmem147	antiquewhite4	0.829966	0.000835046	0.850376	0.000456846	0.785228	0.00247747
ENSMUSG00000037993	64340	Dhx38	antiquewhite4	0.888636	0.000111589	0.927641	1.38226e-05	0.791452	0.00216296
ENSMUSG00000028322	66362	Exosc3	antiquewhite4	0.935506	7.88127e-06	0.922478	1.93386e-05	0.844632	0.00054595
ENSMUSG00000038683	68083	Pak1ip1	antiquewhite4	0.993356	1.00835e-10	0.963395	4.86686e-07	0.983828	8.47781e-09
ENSMUSG00000032932	110920	Hspa13	antiquewhite4	0.963716	4.66025e-07	0.907008	4.67682e-05	0.957221	1.05003e-06
ENSMUSG00000020358	15384	Hnrnpab	antiquewhite4	0.973815	9.27833e-08	0.965713	3.52284e-07	0.977639	4.24052e-08
ENSMUSG00000001134	22294	Uxt	antiquewhite4	0.959339	8.17513e-07	0.950225	2.21286e-06	0.842258	0.00058648
ENSMUSG00000043702	211948	Pde12	antiquewhite4	0.97229	1.22814e-07	0.93648	7.31585e-06	0.958075	9.50708e-07
ENSMUSG00000032593	320844	Amigo3	antiquewhite4	0.94824	2.68154e-06	0.946693	3.09869e-06	0.862344	0.000307538
ENSMUSG00000057363	67883	Uxs1	antiquewhite4	0.885299	0.000128591	0.87268	0.000211968	0.929469	1.22014e-05
ENSMUSG00000028430	230082	Nol6	antiquewhite4	0.912409	3.49999e-05	0.841644	0.000597345	0.878586	0.000168896
ENSMUSG00000014601	229707	Strip1	antiquewhite4	0.971802	1.33923e-07	0.940232	5.43026e-06	0.92172	2.02755e-05
ENSMUSG00000001666	13202	Ddt	antiquewhite4	0.824281	0.000974366	0.87091	0.000226421	0.885117	0.000129571
ENSMUSG00000030942	233802	Thumpd1	antiquewhite4	0.968097	2.46703e-07	0.951452	1.95716e-06	0.945403	3.48474e-06
ENSMUSG00000053007	231991	Creb5	antiquewhite4	0.974377	8.33161e-08	0.975113	7.21076e-08	0.992738	1.57089e-10
ENSMUSG00000031197	22327	Vbp1	antiquewhite4	0.901775	6.09405e-05	0.922375	1.94639e-05	0.96087	6.76534e-07
ENSMUSG00000022722	56297	Arl6	antiquewhite4	0.926611	1.48092e-05	0.913401	3.31193e-05	0.844509	0.000547998
ENSMUSG00000054855	223881	Rnd1	antiquewhite4	0.935518	7.87399e-06	0.98723	2.61832e-09	0.989557	9.61231e-10
ENSMUSG00000022674	70620	Ube2v2	antiquewhite4	0.939529	5.75034e-06	0.934925	8.23414e-06	0.910362	3.91473e-05
ENSMUSG00000016664	23970	Pacsin2	antiquewhite4	0.955575	1.26467e-06	0.946142	3.25931e-06	0.935476	7.89892e-06
ENSMUSG00000078572	208501	Ndufaf8	antiquewhite4	0.934241	8.66634e-06	0.955923	1.21661e-06	0.954691	1.39338e-06
ENSMUSG00000001910	66830	Nacc1	antiquewhite4	0.874941	0.000194578	0.900105	6.61089e-05	0.983443	9.53033e-09
ENSMUSG00000042759	171504	Apobr	antiquewhite4	0.931846	1.03212e-05	0.926327	1.50904e-05	0.960222	7.33598e-07
ENSMUSG00000023938	224805	Aars2	antiquewhite4	0.889377	0.000108065	0.930852	1.1077e-05	0.934187	8.70115e-06
ENSMUSG00000009654	18302	Oit3	antiquewhite4	0.924017	1.75397e-05	0.945256	3.53092e-06	0.965291	3.74278e-07
ENSMUSG00000037787	68020	Apopt1	antiquewhite4	0.824026	0.00098102	0.901432	6.19753e-05	0.929918	1.18266e-05
ENSMUSG00000032475	17973	Nck1	antiquewhite4	0.99797	2.70572e-13	0.987304	2.54355e-09	0.986601	3.32617e-09
ENSMUSG00000062825	11465	Actg1	antiquewhite4	0.999276	1.56257e-15	0.990687	5.43091e-10	0.995707	1.13967e-11
ENSMUSG00000036372	69038	Tmem258	antiquewhite4	0.976782	5.11067e-08	0.972256	1.23577e-07	0.909018	4.20737e-05
ENSMUSG00000021277	22031	Traf3	antiquewhite4	0.991333	3.79479e-10	0.994172	5.24188e-11	0.996685	3.13725e-12
ENSMUSG00000015335	66220	Zdhhc12	antiquewhite4	0.902822	5.78659e-05	0.929832	1.18982e-05	0.935193	8.06994e-06
ENSMUSG00000020088	20224	Sar1a	antiquewhite4	0.890061	0.000104886	0.929187	1.24407e-05	0.917695	2.58743e-05
ENSMUSG00000059119	17955	Nap1l4	antiquewhite4	0.980842	1.96824e-08	0.974169	8.67224e-08	0.977569	4.3069e-08
ENSMUSG00000023175	12215	Bsg	antiquewhite4	0.983774	8.62074e-09	0.992566	1.76536e-10	0.963099	5.06484e-07
ENSMUSG00000022570	22122	Tsta3	antiquewhite4	0.933409	9.21498e-06	0.953636	1.56056e-06	0.969658	1.92482e-07
ENSMUSG00000022285	22631	Ywhaz	antiquewhite4	0.988045	1.88487e-09	0.97876	3.28543e-08	0.993327	1.03032e-10
ENSMUSG00000042305	57439	Tmem183a	antiquewhite4	0.887658	0.000116375	0.844058	0.000555551	0.88006	0.000159302
ENSMUSG00000071172	20383	Srsf3	antiquewhite4	0.995293	1.80526e-11	0.997243	1.2478e-12	0.995692	1.16047e-11
ENSMUSG00000038181	100910	Chpf2	antiquewhite4	0.990023	7.65649e-10	0.981444	1.67945e-08	0.988454	1.58519e-09
ENSMUSG00000061244	105504	Exoc5	antiquewhite4	0.894265	8.69422e-05	0.935809	7.7018e-06	0.979908	2.49299e-08
ENSMUSG00000059796	13681	Eif4a1	antiquewhite4	0.976086	5.91733e-08	0.98689	2.98394e-09	0.97365	9.57196e-08
ENSMUSG00000022710	252870	Usp7	antiquewhite4	0.952736	1.71542e-06	0.958258	9.30433e-07	0.972236	1.24015e-07
ENSMUSG00000056201	12631	Cfl1	antiquewhite4	0.989632	9.27404e-10	0.994611	3.54864e-11	0.983607	9.07025e-09
ENSMUSG00000029580	11461	Actb	antiquewhite4	0.997651	5.61595e-13	0.992982	1.32502e-10	0.996697	3.07895e-12
ENSMUSG00000021710	75805	Nln	antiquewhite4	0.89306	9.18197e-05	0.943172	4.24123e-06	0.948009	2.74086e-06
ENSMUSG00000020361	15525	Hspa4	antiquewhite4	0.954468	1.42747e-06	0.969609	1.94021e-07	0.967153	2.84991e-07
ENSMUSG00000002881	17936	Nab1	antiquewhite4	0.972918	1.09638e-07	0.9921	2.39211e-10	0.984813	6.20284e-09
ENSMUSG00000029198	17713	Grpel1	antiquewhite4	0.982524	1.2466e-08	0.994534	3.80884e-11	0.990648	5.54552e-10
ENSMUSG00000024048	67268	Myl12a	antiquewhite4	0.976927	4.95395e-08	0.982647	1.20364e-08	0.978678	3.3486e-08
ENSMUSG00000035478	17192	Mbd3	antiquewhite4	0.924445	1.70644e-05	0.952649	1.73109e-06	0.981482	1.66236e-08
ENSMUSG00000032423	56403	Syncrip	antiquewhite4	0.993755	7.40391e-11	0.978933	3.15474e-08	0.99227	2.14605e-10
ENSMUSG00000036087	75991	Slain2	antiquewhite4	0.969188	2.07696e-07	0.99469	3.29625e-11	0.997782	4.20909e-13
ENSMUSG00000020650	12033	Bcap29	antiquewhite4	0.966659	3.06809e-07	0.921232	2.08983e-05	0.935498	7.88607e-06
ENSMUSG00000030591	57296	Psmd8	antiquewhite4	0.990504	5.98385e-10	0.986839	3.04154e-09	0.990546	5.8537e-10
ENSMUSG00000033307	17319	Mif	antiquewhite4	0.998736	2.53844e-14	0.990949	4.71106e-10	0.990594	5.70782e-10
ENSMUSG00000027671	56456	Actl6a	antiquewhite4	0.988526	1.53659e-09	0.994173	5.23978e-11	0.995277	1.83641e-11
ENSMUSG00000026229	70247	Psmd1	antiquewhite4	0.978278	3.67228e-08	0.98826	1.72217e-09	0.992926	1.37886e-10
ENSMUSG00000030144	17474	Clec4d	antiquewhite4	0.995565	1.34151e-11	0.996669	3.21328e-12	0.994069	5.72308e-11
ENSMUSG00000032802	76650	Srxn1	antiquewhite4	0.99514	2.11748e-11	0.990481	6.05894e-10	0.996295	5.46374e-12
ENSMUSG00000031278	50790	Acsl4	antiquewhite4	0.988071	1.86478e-09	0.987131	2.72076e-09	0.998503	5.90483e-14
ENSMUSG00000028792	11637	Ak2	antiquewhite4	0.989452	1.0103e-09	0.998673	3.23385e-14	0.993074	1.24103e-10
ENSMUSG00000001802	435965	Lrp3	bisque4	-0.470185	0.122951	-0.513139	0.0879789	-0.0151862	0.962639
ENSMUSG00000032050	19684	Rdx	bisque4	-0.603659	0.037673	-0.327423	0.298852	0.0770427	0.811895
ENSMUSG00000032251	65099	Irak1bp1	bisque4	-0.815886	0.00121213	-0.790926	0.00218827	-0.129151	0.68913
ENSMUSG00000033082	243653	Clec1a	bisque4	-0.84374	0.00056091	-0.392087	0.207458	-0.0887791	0.7838
ENSMUSG00000032334	16949	Loxl1	bisque4	-0.803772	0.00163109	-0.629763	0.0281914	-0.206959	0.518675
ENSMUSG00000042510	212439	AA986860	bisque4	-0.721338	0.00810106	-0.786601	0.00240526	0.160594	0.618066
ENSMUSG00000032925	223272	Itgbl1	bisque4	-0.589452	0.0436923	-0.630559	0.0279325	0.10545	0.744304
ENSMUSG00000025780	209378	Itih5	bisque4	-0.724853	0.00765269	-0.658406	0.0199148	-0.0825757	0.798623
ENSMUSG00000053931	71994	Cnn3	bisque4	-0.882496	0.000144378	-0.897703	7.41374e-05	0.17396	0.588705
ENSMUSG00000050627	333433	Gpd1l	bisque4	-0.530978	0.0756831	-0.524686	0.0798766	0.141263	0.661445
ENSMUSG00000038982	17828	Bloc1s5	bisque4	-0.436332	0.156165	-0.428517	0.164567	0.141495	0.660918
ENSMUSG00000020695	17534	Mrc2	bisque4	-0.792812	0.00209848	-0.682263	0.0145095	0.141818	0.660185
ENSMUSG00000089687	242681	Rab42	bisque4	-0.458399	0.133933	-0.29988	0.343641	0.0959993	0.766631
ENSMUSG00000041298	231912	Katnal1	bisque4	-0.767536	0.00356381	-0.391987	0.207585	-0.0275183	0.932348
ENSMUSG00000044461	219134	Shisa2	bisque4	-0.788343	0.002316	-0.714788	0.00898859	0.0958332	0.767025
ENSMUSG00000078896	100503949	Zfp965	bisque4	-0.966071	3.34496e-07	-0.871884	0.000218375	0.300167	0.343156
ENSMUSG00000048040	76976	Arxes2	bisque4	-0.52825	0.077482	-0.539029	0.0705398	0.16654	0.604938
ENSMUSG00000032368	22771	Zic1	bisque4	-0.731162	0.00689495	-0.506903	0.0925779	0.0608573	0.850971
ENSMUSG00000036356	234356	Csgalnact1	bisque4	-0.433243	0.159452	-0.171228	0.594664	0.0751454	0.816457
ENSMUSG00000037188	230824	Grhl3	bisque4	-0.620681	0.031268	-0.527014	0.0783067	0.143052	0.657389
ENSMUSG00000048332	108927	Lhfp	bisque4	-0.682166	0.0145289	-0.352085	0.261696	0.271842	0.392698
ENSMUSG00000051675	69807	Trim32	bisque4	-0.874878	0.000195046	-0.442567	0.149661	-0.0250995	0.938283
ENSMUSG00000078889	13999	Gm14288	bisque4	-0.975766	6.32022e-08	-0.888454	0.000112466	0.282757	0.373194
ENSMUSG00000052353	80982	Cemip	bisque4	-0.861508	0.000316522	-0.851641	0.000438831	0.237811	0.456706
ENSMUSG00000048402	14633	Gli2	bisque4	-0.661458	0.019152	-0.336756	0.28446	0.158906	0.621812
ENSMUSG00000018809	319822	Smyd4	bisque4	-0.66786	0.017622	-0.802972	0.00166222	0.341088	0.277916
ENSMUSG00000064181	216363	Rab3ip	bisque4	-0.503293	0.095313	-0.851668	0.000438449	0.465056	0.127655
ENSMUSG00000027651	70470	Rprd1b	bisque4	-0.799179	0.00181604	-0.49072	0.10526	0.141072	0.66188
ENSMUSG00000055320	21676	Tead1	bisque4	-0.862074	0.000310413	-0.430947	0.161924	0.134089	0.677798
ENSMUSG00000091264	108934	Smim13	bisque4	-0.935954	7.61704e-06	-0.890321	0.000103699	0.347677	0.268131
ENSMUSG00000091183	380850	Gm5141	bisque4	-0.589767	0.0435519	-0.598967	0.0395909	0.292541	0.35615
ENSMUSG00000024248	20463	Cox7a2l	bisque4	-0.906117	4.89764e-05	-0.899566	6.78492e-05	0.419624	0.174469
ENSMUSG00000026786	54519	Apbb1ip	bisque4	-0.814178	0.00126553	-0.685874	0.0137974	0.274837	0.387296
ENSMUSG00000037204	68118	Atg101	bisque4	-0.836031	0.000703931	-0.746421	0.00529524	0.26968	0.396622
ENSMUSG00000006369	14114	Fbln1	bisque4	-0.526741	0.0784894	-0.471418	0.121837	0.248485	0.43612
ENSMUSG00000035933	238123	Cog5	bisque4	-0.392923	0.206405	-0.139685	0.665031	0.182255	0.570761
ENSMUSG00000027695	18805	Pld1	bisque4	-0.86251	0.000305769	-0.680543	0.014858	0.569121	0.0534479
ENSMUSG00000078901	100503353	Gm14440	bisque4	-0.98438	7.13368e-09	-0.879114	0.000165408	0.46603	0.126753
ENSMUSG00000027230	26427	Creb3l1	bisque4	-0.534493	0.0734071	0.00646154	0.984099	0.118297	0.714243
ENSMUSG00000015094	18146	Npdc1	bisque4	-0.569963	0.053016	-0.35687	0.254814	0.201277	0.53047
ENSMUSG00000005397	18073	Nid1	bisque4	-0.981215	1.7853e-08	-0.963646	4.70426e-07	0.560969	0.0577554
ENSMUSG00000005357	20513	Slc1a6	bisque4	-0.792834	0.00209747	-0.802441	0.00168311	0.367321	0.240154
ENSMUSG00000078861	353208	Zfp931	bisque4	-0.871481	0.000221675	-0.581877	0.0471662	0.113979	0.724307
ENSMUSG00000027204	14118	Fbn1	bisque4	-0.828518	0.000868982	-0.836864	0.000687256	0.477723	0.116246
ENSMUSG00000000753	20317	Serpinf1	bisque4	-0.921858	2.0103e-05	-0.493532	0.102979	0.295443	0.351175
ENSMUSG00000024370	52563	Cdc23	bisque4	-0.812617	0.0013159	-0.558397	0.0591635	0.28168	0.375095
ENSMUSG00000048109	229700	Rbm15	bisque4	-0.835898	0.000706624	-0.690065	0.0130037	0.474337	0.119227
ENSMUSG00000029521	50883	Chek2	bisque4	-0.99038	6.3863e-10	-0.900126	6.60411e-05	0.85416	0.000404615
ENSMUSG00000036893	77683	Ehmt1	bisque4	-0.955344	1.2973e-06	-0.964997	3.90197e-07	0.722419	0.00796111
ENSMUSG00000039542	17967	Ncam1	bisque4	-0.903169	5.68752e-05	-0.929186	1.24421e-05	0.571134	0.0524197
ENSMUSG00000062563	12879	Cys1	bisque4	-0.447214	0.144928	-0.447214	0.144928	0.287731	0.364477
ENSMUSG00000032484	18054	Ngp	bisque4	-0.447214	0.144928	-0.447214	0.144928	0.287731	0.364477
ENSMUSG00000002900	16777	Lamb1	bisque4	-0.83161	0.000797794	-0.644588	0.0236475	0.539591	0.0701899
ENSMUSG00000037852	12876	Cpe	bisque4	-0.783402	0.00257607	-0.760267	0.00410205	0.447377	0.144763
ENSMUSG00000029056	269614	Pank4	bisque4	-0.574774	0.0505957	-0.355668	0.256533	0.248578	0.435944
ENSMUSG00000013539	27883	Tango2	bisque4	-0.838389	0.000657499	-0.72217	0.00799317	0.407651	0.18838
ENSMUSG00000046351	218100	Zfp322a	bisque4	-0.649043	0.0223929	-0.418695	0.175525	0.291021	0.358771
ENSMUSG00000050555	76832	Hyls1	bisque4	-0.894916	8.4394e-05	-0.809135	0.00143381	0.716941	0.00868917
ENSMUSG00000063415	232174	Cyp26b1	bisque4	-0.958536	9.0025e-07	-0.893332	9.06995e-05	0.538781	0.0706946
ENSMUSG00000051065	239796	Mb21d2	bisque4	-0.684658	0.0140343	-0.187788	0.558916	0.20801	0.516506
ENSMUSG00000043716	19989	Rpl7	bisque4	-0.82437	0.000972072	-0.651481	0.0217272	0.347249	0.26876
ENSMUSG00000063531	20349	Sema3e	bisque4	-0.750869	0.00488671	-0.280249	0.377631	0.269642	0.396691
ENSMUSG00000016262	214791	Sertad4	bisque4	-0.736936	0.0062521	-0.623315	0.0303523	0.328461	0.297232
ENSMUSG00000033059	110078	Pygb	bisque4	-0.987959	1.95333e-09	-0.958302	9.25508e-07	0.687877	0.0134136
ENSMUSG00000026526	14194	Fh1	bisque4	-0.97659	5.32445e-08	-0.986285	3.73531e-09	0.846492	0.000515738
ENSMUSG00000067818	98932	Myl9	bisque4	-0.885832	0.000125747	-0.862699	0.000303778	0.505318	0.0937722
ENSMUSG00000039405	76453	Prss23	bisque4	-0.889947	0.00010541	-0.807984	0.00147452	0.513707	0.087568
ENSMUSG00000029661	12843	Col1a2	bisque4	-0.93838	6.30566e-06	-0.750735	0.00489859	0.663497	0.0186545
ENSMUSG00000059430	11468	Actg2	bisque4	-0.961727	6.06503e-07	-0.601088	0.0387155	0.368113	0.239066
ENSMUSG00000004843	68942	Chmp2b	bisque4	-0.436639	0.15584	-0.194487	0.544712	0.306125	0.333185
ENSMUSG00000030789	16411	Itgax	bisque4	-0.973035	1.07316e-07	-0.917205	2.66309e-05	0.740527	0.00587573
ENSMUSG00000014355	17222	Anapc1	bisque4	-0.785401	0.00246826	-0.807158	0.00150426	0.537083	0.0717603
ENSMUSG00000036853	171166	Mcoln3	bisque4	-0.959239	8.27396e-07	-0.978074	3.84723e-08	0.693791	0.0123268
ENSMUSG00000004500	243834	Zfp324	bisque4	-0.958394	9.15551e-07	-0.874371	0.000198848	0.388538	0.211968
ENSMUSG00000050107	14841	Haspin	bisque4	-0.952544	1.74997e-06	-0.945952	3.31614e-06	0.734448	0.00652323
ENSMUSG00000036197	223827	Gxylt1	bisque4	-0.953424	1.59611e-06	-0.923963	1.76007e-05	0.794332	0.00202818
ENSMUSG00000031375	12111	Bgn	bisque4	-0.997085	1.64957e-12	-0.878947	0.000166506	0.560955	0.0577632
ENSMUSG00000028194	69219	Ddah1	bisque4	-0.864729	0.00028298	-0.740455	0.00588308	0.50054	0.0974347
ENSMUSG00000021390	18295	Ogn	bisque4	-0.941399	4.93047e-06	-0.849394	0.000471205	0.521201	0.0822658
ENSMUSG00000059588	54598	Calcrl	bisque4	-0.942051	4.66734e-06	-0.918506	2.46579e-05	0.771618	0.00328612
ENSMUSG00000026455	240756	Klhl12	bisque4	-0.981524	1.64388e-08	-0.654952	0.0208042	0.620459	0.0313461
ENSMUSG00000004044	19285	Cavin1	bisque4	-0.942142	4.63155e-06	-0.834964	0.000725762	0.703379	0.0107051
ENSMUSG00000030138	213895	Bms1	bisque4	-0.788001	0.00233333	-0.629317	0.0283372	0.668858	0.0173917
ENSMUSG00000031928	17535	Mre11a	bisque4	-0.944939	3.63247e-06	-0.877263	0.000177893	0.49745	0.099854
ENSMUSG00000026043	12825	Col3a1	bisque4	-0.956535	1.13565e-06	-0.743195	0.00560733	0.795946	0.00195555
ENSMUSG00000032085	21345	Tagln	bisque4	-0.972938	1.09233e-07	-0.89282	9.28159e-05	0.655777	0.0205892
ENSMUSG00000036959	320376	Bcorl1	bisque4	-0.732835	0.00670375	-0.187263	0.560036	0.396702	0.201683
ENSMUSG00000026709	226539	Dars2	bisque4	-0.746344	0.00530257	-0.542769	0.0682349	0.530753	0.07583
ENSMUSG00000038587	83397	Akap12	bisque4	-0.935192	8.07017e-06	-0.917461	2.62323e-05	0.721061	0.00813718
ENSMUSG00000018593	20692	Sparc	bisque4	-0.986138	3.93829e-09	-0.967418	2.73791e-07	0.883043	0.000141185
ENSMUSG00000040312	240084	Cchcr1	bisque4	-0.94938	2.40355e-06	-0.837485	0.000675009	0.774779	0.00308259
ENSMUSG00000029718	18542	Pcolce	bisque4	-0.938098	6.448e-06	-0.880232	0.00015821	0.772178	0.00324937
ENSMUSG00000057982	235047	Zfp809	bisque4	-0.872189	0.000215903	-0.498076	0.0993604	0.607996	0.0359594
ENSMUSG00000020326	12450	Ccng1	bisque4	-0.960953	6.69454e-07	-0.891622	9.79172e-05	0.856952	0.000369148
ENSMUSG00000034218	11920	Atm	bisque4	-0.764926	0.00375051	-0.328774	0.296745	0.366127	0.241804
ENSMUSG00000021760	69590	Gpx8	bisque4	-0.938882	6.05809e-06	-0.366124	0.241808	0.719259	0.00837529
ENSMUSG00000026604	19250	Ptpn14	bisque4	-0.882298	0.000145551	-0.519806	0.0832359	0.582406	0.0469172
ENSMUSG00000036006	193385	Ripor2	bisque4	-0.898088	7.28036e-05	-0.790408	0.00221347	0.622239	0.0307239
ENSMUSG00000024620	18596	Pdgfrb	bisque4	-0.759742	0.0041432	-0.688136	0.0133648	0.640255	0.0249162
ENSMUSG00000064080	14115	Fbln2	bisque4	-0.960556	7.0372e-07	-0.381017	0.221718	0.488908	0.106749
ENSMUSG00000035783	11475	Acta2	bisque4	-0.984738	6.35625e-09	-0.952592	1.7414e-06	0.74639	0.00529819
ENSMUSG00000026042	12832	Col5a2	bisque4	-0.929761	1.19564e-05	-0.835319	0.000718432	0.65354	0.021176
ENSMUSG00000028763	15530	Hspg2	bisque4	-0.918014	2.53902e-05	-0.645297	0.0234444	0.594116	0.0416465
ENSMUSG00000031478	23954	Nek3	bisque4	-0.893319	9.07546e-05	-0.867217	0.000259032	0.841825	0.000594115
ENSMUSG00000020844	18230	Nxn	bisque4	-0.804024	0.00162137	-0.234785	0.462624	0.658612	0.0198626
ENSMUSG00000002257	23853	Def6	bisque4	-0.863364	0.000296844	-0.68539	0.0138912	0.791837	0.00214456
ENSMUSG00000070436	12406	Serpinh1	bisque4	-0.946281	3.21823e-06	-0.928537	1.30082e-05	0.874413	0.000198531
ENSMUSG00000031803	72297	B3gnt3	bisque4	-0.907732	4.50313e-05	-0.950592	2.13363e-06	0.934795	8.31471e-06
ENSMUSG00000038065	68235	Mturn	bisque4	-0.897769	7.39086e-05	-0.251348	0.430676	0.595393	0.0410983
ENSMUSG00000028433	68926	Ubap2	bisque4	-0.946486	3.15816e-06	-0.858081	0.000355515	0.914877	3.0468e-05
ENSMUSG00000036256	29817	Igfbp7	bisque4	-0.872443	0.000213867	-0.786792	0.00239536	0.81398	0.00127184
ENSMUSG00000028464	22004	Tpm2	bisque4	-0.890771	0.000101671	-0.673937	0.0162544	0.860867	0.000323549
ENSMUSG00000019960	67603	Dusp6	bisque4	-0.983181	1.03059e-08	-0.94831	2.66373e-06	0.965437	3.66561e-07
ENSMUSG00000074519	626848	Zfp971	bisque4	-0.807231	0.00150161	-0.351112	0.263109	0.654572	0.0209037
ENSMUSG00000034205	94352	Loxl2	bisque4	-0.979642	2.66128e-08	-0.717178	0.00865662	0.850158	0.000460001
ENSMUSG00000022816	14314	Fstl1	bisque4	-0.905667	5.01238e-05	-0.583038	0.0466213	0.719649	0.00832335
ENSMUSG00000094526	100862072	Gm21451	bisque4	-0.995232	1.92612e-11	-0.831531	0.000799561	0.962663	5.3673e-07
ENSMUSG00000041219	228482	Arhgap11a	bisque4	-0.963018	5.11966e-07	-0.874131	0.000200672	0.866365	0.00026705
ENSMUSG00000046805	17476	Mpeg1	bisque4	-0.983093	1.0577e-08	-0.783693	0.00256016	0.937623	6.69385e-06
ENSMUSG00000031502	12826	Col4a1	bisque4	-0.983243	1.01186e-08	-0.877261	0.000177907	0.924687	1.67996e-05
ENSMUSG00000068205	72899	Macrod2	bisque4	-0.615832	0.033006	-0.108029	0.73824	0.857139	0.000366864
ENSMUSG00000046230	271564	Vps13a	bisque4	-0.793094	0.00208531	-0.301673	0.340622	0.858766	0.000347443
ENSMUSG00000049922	228368	Slc35c1	bisque4	-0.973587	9.68465e-08	-0.410703	0.18477	0.925779	1.56454e-05
ENSMUSG00000030868	59288	Dctn5	bisque4	-0.952955	1.67678e-06	-0.661174	0.0192221	0.962172	5.72455e-07
ENSMUSG00000030759	67420	Far1	bisque4	-0.96317	5.01672e-07	-0.819653	0.0011005	0.942257	4.58667e-06
ENSMUSG00000001506	12842	Col1a1	bisque4	-0.958633	8.8989e-07	-0.867116	0.00025997	0.981605	1.60823e-08
ENSMUSG00000032796	16772	Lama1	bisque4	-0.882068	0.000146919	-0.321699	0.307877	0.842086	0.000589517
ENSMUSG00000002332	52585	Dhrs1	bisque4	-0.903475	5.60111e-05	-0.422686	0.171019	0.926551	1.48682e-05
ENSMUSG00000026837	12831	Col5a1	bisque4	-0.918061	2.53187e-05	-0.456619	0.135646	0.819553	0.00110334
ENSMUSG00000068923	229521	Syt11	bisque4	-0.967601	2.66271e-07	-0.471005	0.122209	0.948284	2.67032e-06
ENSMUSG00000031503	12827	Col4a2	bisque4	-0.830701	0.000818221	-0.298917	0.345268	0.816698	0.00118736
ENSMUSG00000074039	75116	4930520O04Rik	black	-0.41764	0.176728	-0.685304	0.0139081	-0.555488	0.0607844
ENSMUSG00000024420	225207	Zfp521	black	-0.389275	0.211026	-0.56546	0.0553534	-0.351705	0.262247
ENSMUSG00000040282	399568	BC052040	black	-0.671847	0.0167157	-0.565334	0.0554201	-0.610813	0.034877
ENSMUSG00000071591	74715	4930521O11Rik	black	-0.365371	0.242851	-0.706311	0.0102425	-0.316008	0.316998
ENSMUSG00000023046	16012	Igfbp6	black	-0.457335	0.134955	-0.837992	0.000665152	-0.433907	0.158742
ENSMUSG00000021057	238276	Akap5	black	-0.496182	0.100858	-0.670585	0.0169986	-0.353343	0.259876
ENSMUSG00000047517	12945	Dmbt1	black	-0.341533	0.27725	-0.706957	0.0101426	-0.357364	0.25411
ENSMUSG00000072294	16597	Klf12	black	-0.428116	0.165006	-0.705001	0.0104473	-0.318815	0.312481
ENSMUSG00000056758	15364	Hmga2	black	-0.276807	0.383763	-0.627591	0.0289064	-0.406325	0.189961
ENSMUSG00000026705	226541	Klhl20	black	-0.477736	0.116234	-0.685158	0.0139365	-0.420539	0.173434
ENSMUSG00000096950	671336	Gm9530	black	-0.205871	0.520925	-0.683076	0.014347	-0.373927	0.231153
ENSMUSG00000070803	56222	Cited4	black	-0.331137	0.293077	-0.727947	0.00727362	-0.415256	0.179467
ENSMUSG00000084984	69295	Far1os	black	-0.379748	0.22339	-0.666457	0.0179493	-0.330618	0.29388
ENSMUSG00000067455	319159	Hist1h4j	black	-0.363004	0.246148	-0.932235	1.00362e-05	-0.35358	0.259535
ENSMUSG00000087579	668215	Hectd2os	black	-0.399573	0.198141	-0.768546	0.00349354	-0.318214	0.313446
ENSMUSG00000027875	15360	Hmgcs2	black	-0.365371	0.242851	-0.706311	0.0102425	-0.380505	0.222392
ENSMUSG00000015599	106763	Ttbk1	black	-0.506411	0.0929473	-0.869599	0.000237602	-0.420051	0.173986
ENSMUSG00000015812	14714	Gnrh1	black	-0.314869	0.318842	-0.882493	0.000144398	-0.590294	0.043318
ENSMUSG00000043487	217700	Acot6	black	-0.30006	0.343338	-0.641832	0.0244489	-0.506715	0.092719
ENSMUSG00000026575	171567	Nme7	black	-0.591832	0.0426396	-0.802705	0.00167269	-0.505677	0.0935005
ENSMUSG00000085236	72495	2610206C17Rik	black	-0.113206	0.726114	-0.625667	0.0295505	-0.361402	0.248394
ENSMUSG00000050050	320696	Ccdc158	black	-0.623578	0.0302618	-0.590411	0.0432662	-0.466074	0.126713
ENSMUSG00000026972	215705	Arrdc1	black	-0.361823	0.247803	-0.849052	0.000476292	-0.582617	0.0468185
ENSMUSG00000078451	73075	Ppil6	black	-0.77196	0.00326365	-0.916844	2.71995e-05	-0.446929	0.145215
ENSMUSG00000028164	110173	Manba	black	-0.693167	0.0124383	-0.770326	0.00337215	-0.618083	0.032191
ENSMUSG00000020716	18015	Nf1	black	-0.312868	0.322093	-0.84701	0.000507559	-0.443052	0.149161
ENSMUSG00000101223	75883	4930568A12Rik	black	-0.852987	0.000420286	-0.688576	0.0132816	-0.521166	0.08229
ENSMUSG00000056870	70676	Gulp1	black	-0.21989	0.492266	-0.710465	0.00961281	-0.528091	0.0775876
ENSMUSG00000069727	434179	Zfp975	black	-0.775638	0.00302902	-0.846745	0.000511738	-0.522481	0.0813827
ENSMUSG00000034968	16815	Lbx2	black	-0.723742	0.00779233	-0.823621	0.000991647	-0.591419	0.042821
ENSMUSG00000051483	12408	Cbr1	black	-0.67532	0.0159544	-0.96095	6.69702e-07	-0.45241	0.13975
ENSMUSG00000031385	140571	Plxnb3	black	-0.694417	0.0122156	-0.924031	1.75243e-05	-0.482298	0.112296
ENSMUSG00000091586	208285	Cyp4f17	black	-0.229216	0.473607	-0.625838	0.029493	-0.476788	0.117064
ENSMUSG00000026811	50935	St6galnac6	black	-0.418673	0.175551	-0.760998	0.00404532	-0.519871	0.0831907
ENSMUSG00000032782	216846	Cntrob	black	-0.704404	0.0105417	-0.839549	0.000635543	-0.641564	0.0245278
ENSMUSG00000040390	269881	Map3k10	black	-0.568726	0.0536512	-0.848332	0.000487147	-0.682741	0.0144137
ENSMUSG00000031486	78560	Adgra2	black	-0.743855	0.0055424	-0.90849	4.32681e-05	-0.65307	0.0213009
ENSMUSG00000053914	244694	Kdm4d	black	-0.521698	0.0819223	-0.749636	0.00499747	-0.497115	0.100118
ENSMUSG00000022914	93871	Brwd1	black	-0.254634	0.42447	-0.760893	0.00405346	-0.525657	0.0792189
ENSMUSG00000026158	70155	Ogfrl1	black	-0.333251	0.289818	-0.643169	0.0240578	-0.762349	0.00394202
ENSMUSG00000024593	70417	Megf10	black	-0.394418	0.204529	-0.762859	0.00390357	-0.474552	0.119037
ENSMUSG00000036186	56279	Dipk1b	black	-0.36779	0.239509	-0.921481	2.05789e-05	-0.578224	0.0489087
ENSMUSG00000062116	232853	Zfp954	black	-0.327218	0.299173	-0.66672	0.0178876	-0.439128	0.153225
ENSMUSG00000049907	68939	Rasl11b	black	-0.401331	0.19599	-0.793874	0.00204921	-0.58924	0.0437872
ENSMUSG00000063808	67471	Gpatch1	black	-0.497015	0.100198	-0.678441	0.0152923	-0.548137	0.0650177
ENSMUSG00000041187	101540	Prkd2	black	-0.516991	0.0852166	-0.83984	0.000630125	-0.530468	0.0760171
ENSMUSG00000057614	14677	Gnai1	black	-0.618082	0.0321914	-0.823791	0.000987163	-0.556423	0.0602603
ENSMUSG00000057421	76130	Las1l	black	-0.746795	0.00525989	-0.868118	0.000250751	-0.752803	0.00471666
ENSMUSG00000031592	18536	Pcm1	black	-0.722581	0.00794028	-0.917565	2.60723e-05	-0.766403	0.00364399
ENSMUSG00000008601	53868	Rab25	black	-0.752826	0.00471465	-0.94261	4.45061e-06	-0.551263	0.0631933
ENSMUSG00000086330	69320	1700007J10Rik	black	-0.463167	0.129416	-0.800195	0.00177378	-0.525724	0.079174
ENSMUSG00000041740	50849	Rnf10	black	-0.657053	0.0202599	-0.878507	0.000169427	-0.690199	0.0129789
ENSMUSG00000038473	70729	Nos1ap	black	-0.428586	0.164491	-0.752087	0.00477904	-0.641333	0.0245961
ENSMUSG00000031631	66756	Cfap97	black	-0.607178	0.0362784	-0.829325	0.000849943	-0.70429	0.0105597
ENSMUSG00000007950	64296	Abhd8	black	-0.647112	0.0229306	-0.884497	0.00013296	-0.859783	0.000335712
ENSMUSG00000029438	77045	Bcl7a	black	-0.596348	0.0406915	-0.884094	0.000135201	-0.707959	0.0099891
ENSMUSG00000086424	102638208	Gm15569	black	-0.498084	0.0993545	-0.71708	0.0086701	-0.779451	0.00279957
ENSMUSG00000043019	66967	Edem3	black	-0.711281	0.00949255	-0.934541	8.47427e-06	-0.883739	0.0001372
ENSMUSG00000032739	378460	Pram1	black	-0.57973	0.048185	-0.8095	0.00142108	-0.685812	0.0138093
ENSMUSG00000021835	12159	Bmp4	black	-0.759632	0.00415184	-0.907398	4.58259e-05	-0.689468	0.0131146
ENSMUSG00000033948	74464	Zswim5	black	-0.514666	0.0868768	-0.915612	2.92135e-05	-0.799034	0.00182209
ENSMUSG00000019820	22288	Utrn	black	-0.745942	0.00534072	-0.987575	2.28388e-09	-0.819701	0.00109912
ENSMUSG00000071074	28064	Yipf3	black	-0.352666	0.260855	-0.73631	0.00631946	-0.624801	0.029844
ENSMUSG00000035236	320271	Scai	black	-0.578525	0.0487635	-0.879622	0.000162107	-0.631964	0.0274799
ENSMUSG00000024293	77805	Esco1	black	-0.499022	0.0986184	-0.747758	0.00516983	-0.66052	0.0193842
ENSMUSG00000003379	12518	Cd79a	black	-0.473743	0.119755	-0.620821	0.0312189	-0.594735	0.0413799
ENSMUSG00000075576	100037262	Gm12359	black	-0.341927	0.27666	-0.77493	0.00307317	-0.614716	0.0334159
ENSMUSG00000027304	76246	Rtf1	black	-0.571393	0.0522883	-0.833732	0.000751609	-0.659204	0.0197131
ENSMUSG00000067567	70315	Hdac8	black	-0.724725	0.00766865	-0.883774	0.000137004	-0.6963	0.0118859
ENSMUSG00000021259	13116	Cyp46a1	black	-0.388668	0.211802	-0.764434	0.00378653	-0.636991	0.0259039
ENSMUSG00000033542	54324	Arhgef5	black	-0.571484	0.0522423	-0.833491	0.000756739	-0.58086	0.0476468
ENSMUSG00000035469	71330	Rcbtb1	black	-0.279974	0.378118	-0.645195	0.0234736	-0.624059	0.030097
ENSMUSG00000017376	18099	Nlk	black	-0.569005	0.0535071	-0.894412	8.63628e-05	-0.538294	0.0709991
ENSMUSG00000074505	270120	Fat3	black	-0.533232	0.0742182	-0.907267	4.61412e-05	-0.688176	0.0133571
ENSMUSG00000040389	99512	Wdr47	black	-0.614552	0.0334761	-0.820544	0.0010753	-0.617614	0.0323597
ENSMUSG00000036106	109270	Prr5	black	-0.593686	0.0418319	-0.86014	0.00033167	-0.722835	0.00790773
ENSMUSG00000006014	96875	Prg4	black	-0.461724	0.130773	-0.70932	0.00978342	-0.605322	0.037009
ENSMUSG00000071757	387609	Zhx2	black	-0.558537	0.0590863	-0.716839	0.00870313	-0.576231	0.0498786
ENSMUSG00000047793	208777	Sned1	black	-0.406375	0.189902	-0.952647	1.73139e-06	-0.859747	0.000336121
ENSMUSG00000046442	320472	Ppm1e	black	-0.553358	0.0619906	-0.809634	0.00141642	-0.799949	0.00178393
ENSMUSG00000085720	665934	Gm7854	black	-0.269507	0.396936	-0.692531	0.0125526	-0.621792	0.0308795
ENSMUSG00000038250	74841	Usp38	black	-0.421525	0.172323	-0.950377	2.1798e-06	-0.819147	0.00111501
ENSMUSG00000025170	217371	Rab40b	black	-0.542331	0.068502	-0.816521	0.00119271	-0.598634	0.0397297
ENSMUSG00000021461	14088	Fancc	black	-0.679995	0.0149705	-0.912355	3.51039e-05	-0.902027	6.01892e-05
ENSMUSG00000021311	238505	Mtr	black	-0.718975	0.00841324	-0.92524	1.62074e-05	-0.786325	0.00241967
ENSMUSG00000097585	319711	E230029C05Rik	black	-0.49023	0.105661	-0.759735	0.00414372	-0.688495	0.0132968
ENSMUSG00000033029	27660	1700088E04Rik	black	-0.431852	0.160947	-0.800251	0.00177151	-0.682384	0.0144852
ENSMUSG00000062762	13663	Ei24	black	-0.46972	0.123372	-0.817947	0.00115001	-0.703887	0.0106239
ENSMUSG00000054003	74691	Tdrd9	black	-0.425493	0.167893	-0.685819	0.013808	-0.566184	0.0549731
ENSMUSG00000026854	74270	Usp20	black	-0.468799	0.124211	-0.82834	0.000873215	-0.835915	0.000706269
ENSMUSG00000002781	70209	Tmem143	black	-0.631681	0.0275706	-0.876624	0.000182366	-0.755149	0.00451648
ENSMUSG00000025377	78777	Tepsin	black	-0.667266	0.01776	-0.833482	0.000756946	-0.749641	0.00499698
ENSMUSG00000022010	21807	Tsc22d1	black	-0.583456	0.0464264	-0.912233	3.53418e-05	-0.797908	0.00186994
ENSMUSG00000044715	66787	Gskip	black	-0.758836	0.00421488	-0.958924	8.59455e-07	-0.668339	0.0175111
ENSMUSG00000038002	57354	Cramp1l	black	-0.415844	0.17879	-0.77542	0.00304255	-0.579542	0.0482747
ENSMUSG00000078439	72273	Smim24	black	-0.709446	0.00976448	-0.948316	2.66236e-06	-0.870735	0.000227889
ENSMUSG00000038822	209462	Hace1	black	-0.680298	0.0149083	-0.886278	0.000123403	-0.716251	0.00878426
ENSMUSG00000022671	72083	Mzt2	black	-0.619383	0.031727	-0.887644	0.000116446	-0.900422	6.51027e-05
ENSMUSG00000051851	72865	Rtl8c	black	-0.769347	0.0034385	-0.898036	7.29814e-05	-0.698632	0.0114867
ENSMUSG00000030306	387314	Tmtc1	black	-0.655772	0.0205905	-0.905206	5.1318e-05	-0.740355	0.00589331
ENSMUSG00000030779	19647	Rbbp6	black	-0.414677	0.180136	-0.813187	0.00129733	-0.753932	0.00461949
ENSMUSG00000028139	66353	Riiad1	black	-0.363016	0.246131	-0.606421	0.0365752	-0.64124	0.0246237
ENSMUSG00000024998	74055	Plce1	black	-0.563922	0.056168	-0.745353	0.00539704	-0.729691	0.00706634
ENSMUSG00000057534	217066	Elobl	black	-0.557717	0.0595397	-0.822349	0.00102558	-0.729116	0.00713415
ENSMUSG00000007603	224907	Dus3l	black	-0.49608	0.100939	-0.780842	0.00271926	-0.759939	0.00412775
ENSMUSG00000101268	72131	2010310C07Rik	black	-0.297766	0.347219	-0.627001	0.0291028	-0.616941	0.0326029
ENSMUSG00000020220	230895	Vps13d	black	-0.661847	0.0190565	-0.955872	1.22345e-06	-0.814013	0.00127078
ENSMUSG00000078906	105244402	LOC105244402	black	-0.57986	0.0481226	-0.740062	0.00592341	-0.696927	0.0117777
ENSMUSG00000049013	368202	Prss48	black	-0.315482	0.317849	-0.706957	0.0101426	-0.706957	0.0101426
ENSMUSG00000086569	72218	Rab11fip4os2	black	-0.315482	0.317849	-0.706957	0.0101426	-0.706957	0.0101426
ENSMUSG00000035109	271849	Shc4	black	-0.652831	0.0213647	-0.87287	0.000210463	-0.745983	0.0053368
ENSMUSG00000022558	223658	Mroh1	black	-0.610632	0.0349457	-0.845438	0.000532688	-0.680507	0.0148654
ENSMUSG00000016386	77015	Mpped2	black	-0.377198	0.226771	-0.664133	0.0185014	-0.71818	0.00852031
ENSMUSG00000000402	54156	Egfl6	black	-0.399173	0.198632	-0.636521	0.0260483	-0.701368	0.0110313
ENSMUSG00000051504	233274	Siglech	black	-0.483174	0.11155	-0.930833	1.10919e-05	-0.725257	0.00760242
ENSMUSG00000021901	104416	Bap1	black	-0.686029	0.0137674	-0.869904	0.000234968	-0.740672	0.00586086
ENSMUSG00000049092	70713	Gpr137c	black	-0.44961	0.142525	-0.928738	1.28306e-05	-0.87013	0.000233024
ENSMUSG00000049036	69195	Tmem121	black	-0.581059	0.0475526	-0.899536	6.79446e-05	-0.900166	6.59124e-05
ENSMUSG00000028071	27371	Sh2d2a	black	-0.341533	0.27725	-0.706957	0.0101426	-0.706957	0.0101426
ENSMUSG00000099160	102466159	Mir6415	black	-0.397248	0.201007	-0.683578	0.0142471	-0.683578	0.0142471
ENSMUSG00000057163	22072	Prss2	black	-0.358218	0.252894	-0.705478	0.0103725	-0.705478	0.0103725
ENSMUSG00000027782	16649	Kpna4	black	-0.432174	0.1606	-0.823149	0.00100413	-0.888834	0.000110636
ENSMUSG00000032946	19395	Rasgrp2	black	-0.737996	0.00613914	-0.937556	6.72908e-06	-0.939763	5.64236e-06
ENSMUSG00000084885	75693	3010001F23Rik	black	-0.365371	0.242851	-0.706311	0.0102425	-0.706311	0.0102425
ENSMUSG00000027498	67337	Cstf1	black	-0.527915	0.0777051	-0.951862	1.87729e-06	-0.809698	0.00141422
ENSMUSG00000028999	72772	Rint1	black	-0.726035	0.00750621	-0.787607	0.00235341	-0.863045	0.000300157
ENSMUSG00000032652	232430	Crebl2	black	-0.585051	0.0456877	-0.834701	0.000731213	-0.68335	0.0142923
ENSMUSG00000098600	102465560	Mir6929	black	-0.371642	0.234244	-0.706311	0.0102425	-0.706311	0.0102425
ENSMUSG00000040631	114255	Dok4	black	-0.795576	0.001972	-0.904827	5.23185e-05	-0.894807	8.48158e-05
ENSMUSG00000041775	69546	Mapk1ip1	black	-0.907734	4.50279e-05	-0.923956	1.76083e-05	-0.877339	0.000177367
ENSMUSG00000030741	73658	Spns1	black	-0.711533	0.00945559	-0.796601	0.00192664	-0.712972	0.009247
ENSMUSG00000032604	97541	Qars	black	-0.450453	0.141686	-0.907189	4.63293e-05	-0.782518	0.00262484
ENSMUSG00000075592	277154	Nynrin	black	-0.72353	0.0078192	-0.946024	3.29434e-06	-0.778527	0.0028539
ENSMUSG00000025197	226143	Cyp2c23	black	-0.597047	0.0403957	-0.899836	6.69732e-05	-0.71289	0.00925881
ENSMUSG00000048012	243963	Zfp473	black	-0.907509	4.55619e-05	-0.927739	1.37323e-05	-0.775804	0.00301873
ENSMUSG00000021466	19206	Ptch1	black	-0.806308	0.00153535	-0.932001	1.02072e-05	-0.786911	0.00238921
ENSMUSG00000024654	66514	Asrgl1	black	-0.883838	0.000136643	-0.94913	2.46255e-06	-0.692768	0.01251
ENSMUSG00000058812	68386	0610039K10Rik	black	-0.667125	0.0177929	-0.825542	0.000942033	-0.68714	0.013554
ENSMUSG00000057551	244713	Zfp317	black	-0.72045	0.00821735	-0.876892	0.000180476	-0.865416	0.000276206
ENSMUSG00000039958	320204	Etfbkmt	black	-0.774434	0.00310436	-0.928708	1.28571e-05	-0.968315	2.38494e-07
ENSMUSG00000067071	55927	Hes6	black	-0.622438	0.0306549	-0.841411	0.000601496	-0.755561	0.00448199
ENSMUSG00000024908	52036	Ppp6r3	black	-0.400827	0.196605	-0.774401	0.00310646	-0.701124	0.0110714
ENSMUSG00000050890	230809	Pdik1l	black	-0.871989	0.000217521	-0.906897	4.70397e-05	-0.69439	0.0122204
ENSMUSG00000032417	69519	Rwdd2a	black	-0.890495	0.00010291	-0.963756	4.63439e-07	-0.861807	0.000313283
ENSMUSG00000017417	72324	Plxdc1	black	-0.812672	0.00131409	-0.961067	6.5988e-07	-0.969978	1.82649e-07
ENSMUSG00000029524	75387	Sirt4	black	-0.800409	0.00176498	-0.984598	6.6515e-09	-0.915413	2.95486e-05
ENSMUSG00000028467	230101	Gba2	black	-0.820148	0.00108642	-0.910929	3.79612e-05	-0.81762	0.0011597
ENSMUSG00000023072	72140	Cep89	black	-0.815019	0.00123901	-0.905823	4.97236e-05	-0.808473	0.0014571
ENSMUSG00000029166	100732	Mapre3	black	-0.403946	0.192819	-0.8465	0.000515616	-0.76556	0.00370452
ENSMUSG00000032281	94180	Acsbg1	black	-0.456926	0.135349	-0.878918	0.000166697	-0.96811	2.46198e-07
ENSMUSG00000031022	57355	BC051019	black	-0.550443	0.0636684	-0.850816	0.000450513	-0.827431	0.000895124
ENSMUSG00000048814	381338	Lonrf2	black	-0.427717	0.165443	-0.662276	0.0189512	-0.649443	0.0222827
ENSMUSG00000095247	100861978	LOC100861978	black	-0.822486	0.00102188	-0.933576	9.10319e-06	-0.708385	0.00992438
ENSMUSG00000030200	66813	Bcl2l14	black	-0.548652	0.0647147	-0.869341	0.000239853	-0.742162	0.00571011
ENSMUSG00000093606	414095	B130034C11Rik	black	-0.675194	0.0159816	-0.86979	0.000235952	-0.799472	0.00180376
ENSMUSG00000060166	27801	Zdhhc8	black	-0.84817	0.000489613	-0.895081	8.3758e-05	-0.904539	5.30878e-05
ENSMUSG00000040345	216445	Arhgap9	black	-0.870329	0.000231326	-0.944195	3.87965e-06	-0.874537	0.000197595
ENSMUSG00000097115	69086	1810019N24Rik	black	-0.722122	0.00799937	-0.914754	3.06824e-05	-0.728747	0.00717794
ENSMUSG00000049728	244219	Zfp668	black	-0.419125	0.175037	-0.852809	0.000422693	-0.842694	0.000578866
ENSMUSG00000052512	78286	Nav2	black	-0.580449	0.047842	-0.898579	7.11252e-05	-0.743773	0.00555043
ENSMUSG00000002250	19015	Ppard	black	-0.583059	0.0466115	-0.929762	1.19561e-05	-0.755281	0.00450544
ENSMUSG00000027272	22222	Ubr1	black	-0.852615	0.000425348	-0.994677	3.33576e-11	-0.855701	0.000384726
ENSMUSG00000040043	56516	Rbms2	black	-0.879003	0.000166141	-0.8968	7.73461e-05	-0.856214	0.000378284
ENSMUSG00000040717	171463	Il17rd	black	-0.379609	0.223574	-0.789643	0.002251	-0.706734	0.0101771
ENSMUSG00000047881	100532	Rell1	black	-0.869196	0.000241129	-0.934564	8.46021e-06	-0.878174	0.000171661
ENSMUSG00000078919	13480	Dpm1	black	-0.641498	0.0245473	-0.960998	6.65631e-07	-0.88863	0.000111618
ENSMUSG00000040584	18671	Abcb1a	black	-0.535904	0.0725064	-0.891897	9.67262e-05	-0.837531	0.000674113
ENSMUSG00000044080	20193	S100a1	black	-0.988204	1.76347e-09	-0.994812	2.93383e-11	-0.90144	6.1949e-05
ENSMUSG00000034799	382018	Unc13a	black	-0.760119	0.00411363	-0.811046	0.00136814	-0.820754	0.00106942
ENSMUSG00000097075	381922	Cdiptos	black	-0.473309	0.120142	-0.863473	0.000295712	-0.940428	5.34371e-06
ENSMUSG00000016984	68145	Etaa1	black	-0.737658	0.00617498	-0.889129	0.000109234	-0.807587	0.00148876
ENSMUSG00000042099	80880	Kank3	black	-0.738036	0.00613494	-0.975301	6.94483e-08	-0.818041	0.00114724
ENSMUSG00000084799	100380944	Ino80dos	black	-0.582356	0.0469407	-0.927878	1.36041e-05	-0.808531	0.00145504
ENSMUSG00000026009	54167	Icos	black	-0.399129	0.198686	-0.924611	1.68821e-05	-0.826968	0.000906467
ENSMUSG00000086348	75508	1700017J07Rik	black	-0.401513	0.195768	-0.933676	9.03584e-06	-0.915853	2.88106e-05
ENSMUSG00000027845	140917	Dclre1b	black	-0.862671	0.000304078	-0.911912	3.59735e-05	-0.89468	8.53131e-05
ENSMUSG00000032340	18007	Neo1	black	-0.683747	0.0142137	-0.968162	2.44214e-07	-0.944332	3.83297e-06
ENSMUSG00000030117	14562	Gdf3	black	-0.448512	0.143623	-0.822155	0.00103085	-0.810039	0.00140245
ENSMUSG00000054134	52020	Umodl1	black	-0.94413	3.90177e-06	-0.990831	5.02665e-10	-0.901268	6.24737e-05
ENSMUSG00000085016	100034675	Gm11335	black	-0.429239	0.163778	-0.79591	0.00195713	-0.742679	0.00565847
ENSMUSG00000021258	12454	Ccnk	black	-0.644492	0.023675	-0.884188	0.000134677	-0.812917	0.00130611
ENSMUSG00000031358	17692	Msl3	black	-0.619013	0.0318582	-0.869837	0.00023554	-0.804238	0.00161316
ENSMUSG00000086495	102632821	LOC102632821	black	-0.923419	1.82217e-05	-0.94371	4.04766e-06	-0.79386	0.00204984
ENSMUSG00000033763	244654	Mtss2	black	-0.561843	0.0572824	-0.84478	0.000543491	-0.794283	0.00203044
ENSMUSG00000052783	14772	Grk4	black	-0.715824	0.00884349	-0.873333	0.000206826	-0.807499	0.00149191
ENSMUSG00000022426	74158	Josd1	black	-0.661196	0.0192167	-0.903251	5.66411e-05	-0.847415	0.000501243
ENSMUSG00000019876	18768	Pkib	black	-0.898892	7.0072e-05	-0.969523	1.96757e-07	-0.9051	5.15964e-05
ENSMUSG00000073413	114654	Ly6g6d	black	-0.612181	0.0343597	-0.857436	0.000363259	-0.87384	0.000202903
ENSMUSG00000020628	217449	Trappc12	black	-0.914941	3.03579e-05	-0.964527	4.16737e-07	-0.849025	0.0004767
ENSMUSG00000085174	102632669	Gm16206	black	-0.613281	0.0339476	-0.865824	0.000272238	-0.772829	0.003207
ENSMUSG00000038022	330323	Mindy4	black	-0.81907	0.00111723	-0.937568	6.72285e-06	-0.948464	2.62503e-06
ENSMUSG00000092212	109280	Slc22a13b	black	-0.519086	0.0837397	-0.959673	7.84863e-07	-0.889015	0.000109773
ENSMUSG00000098415	102466767	Mir6928	black	-0.395267	0.203469	-0.718071	0.00853509	-0.750964	0.00487819
ENSMUSG00000022474	29858	Pmm1	black	-0.652458	0.0214645	-0.854819	0.000396012	-0.861451	0.000317146
ENSMUSG00000030134	70727	Rasgef1a	black	-0.761119	0.004036	-0.910139	3.96206e-05	-0.860335	0.000329469
ENSMUSG00000026096	72085	Osgepl1	black	-0.819766	0.00109727	-0.84565	0.000529243	-0.857986	0.000356654
ENSMUSG00000073877	100039863	Gm13306	black	-0.785122	0.00248312	-0.941325	4.96104e-06	-0.756706	0.00438718
ENSMUSG00000040929	19726	Rfx3	black	-0.571932	0.0520157	-0.886403	0.000122752	-0.805769	0.00155533
ENSMUSG00000017286	67201	Glod4	black	-0.642833	0.0241555	-0.819218	0.00111296	-0.806962	0.00151137
ENSMUSG00000097650	66709	4921507G05Rik	black	-0.660895	0.0192911	-0.895071	8.37952e-05	-0.83643	0.000695904
ENSMUSG00000051022	15476	Hs3st1	black	-0.683335	0.0142954	-0.782923	0.00260241	-0.88981	0.000106043
ENSMUSG00000052609	263406	Plekhg3	black	-0.880223	0.000158269	-0.950528	2.14736e-06	-0.916481	2.77812e-05
ENSMUSG00000021051	26932	Ppp2r5e	black	-0.832466	0.000778903	-0.86964	0.000237246	-0.821637	0.00104497
ENSMUSG00000047379	108902	B4gat1	black	-0.912811	3.42283e-05	-0.978522	3.47234e-08	-0.926176	1.5242e-05
ENSMUSG00000093828	100039939	Gm2506	black	-0.943132	4.25585e-06	-0.979022	3.08915e-08	-0.807535	0.00149063
ENSMUSG00000007021	20974	Syngr3	black	-0.84895	0.000477817	-0.855658	0.000385268	-0.89059	0.000102484
ENSMUSG00000003282	56711	Plag1	black	-0.546999	0.0656908	-0.821377	0.00105214	-0.814478	0.00125603
ENSMUSG00000007833	69748	Aldh16a1	black	-0.715514	0.0088867	-0.915701	2.90632e-05	-0.843737	0.00056097
ENSMUSG00000020451	16886	Limk2	black	-0.800555	0.001759	-0.891805	9.71224e-05	-0.858204	0.000354055
ENSMUSG00000026807	68870	Ak8	black	-0.884706	0.00013181	-0.930587	1.1286e-05	-0.836928	0.000685978
ENSMUSG00000013646	79566	Sh3bp5l	black	-0.930108	1.16712e-05	-0.992774	1.53278e-10	-0.980393	2.20804e-08
ENSMUSG00000059022	333088	Kcp	black	-0.570653	0.0526637	-0.80587	0.00155156	-0.765197	0.00373082
ENSMUSG00000023942	63959	Slc29a1	black	-0.757084	0.00435622	-0.88314	0.000140625	-0.86949	0.000238552
ENSMUSG00000061577	382045	Adgrg5	black	-0.585139	0.0456474	-0.787031	0.00238301	-0.820203	0.00108487
ENSMUSG00000041852	21411	Tcf20	black	-0.728001	0.00726715	-0.837774	0.000669367	-0.87759	0.000175636
ENSMUSG00000037395	214742	Rcor3	black	-0.851005	0.000447821	-0.877564	0.000175809	-0.914272	3.15345e-05
ENSMUSG00000018449	69723	Rpain	black	-0.914472	3.11789e-05	-0.959238	8.27548e-07	-0.96301	5.12494e-07
ENSMUSG00000036943	235442	Rab8b	black	-0.586801	0.0448869	-0.959128	8.38662e-07	-0.900868	6.37064e-05
ENSMUSG00000021796	12166	Bmpr1a	black	-0.841042	0.000608124	-0.959913	7.6213e-07	-0.945106	3.57869e-06
ENSMUSG00000068740	53883	Celsr2	black	-0.825506	0.000942935	-0.953663	1.55616e-06	-0.834443	0.000736606
ENSMUSG00000037703	241638	Lzts3	black	-0.669694	0.0172007	-0.913668	3.26263e-05	-0.809955	0.00140534
ENSMUSG00000053898	51798	Ech1	black	-0.951713	1.90603e-06	-0.983802	8.54709e-09	-0.908742	4.26957e-05
ENSMUSG00000031858	74549	Mau2	black	-0.955729	1.24316e-06	-0.974583	8.00506e-08	-0.874371	0.000198852
ENSMUSG00000072762	100041734	4930522L14Rik	black	-0.92695	1.44791e-05	-0.971264	1.47058e-07	-0.917362	2.63864e-05
ENSMUSG00000063698	94281	Sfxn4	black	-0.692982	0.0124715	-0.944008	3.94363e-06	-0.885992	0.000124901
ENSMUSG00000032246	75600	Calml4	black	-0.692093	0.0126319	-0.964798	4.01252e-07	-0.863548	0.000294941
ENSMUSG00000030876	59052	Mettl9	black	-0.926829	1.45955e-05	-0.958602	8.9319e-07	-0.937357	6.83482e-06
ENSMUSG00000031755	67378	Bbs2	black	-0.856538	0.000374247	-0.913601	3.27496e-05	-0.930507	1.13499e-05
ENSMUSG00000046562	106840	Unc119b	black	-0.916633	2.75355e-05	-0.951098	2.02836e-06	-0.943318	4.1879e-06
ENSMUSG00000054939	385674	Zfp174	black	-0.545318	0.066694	-0.884808	0.000131253	-0.78556	0.00245988
ENSMUSG00000003847	54446	Nfat5	black	-0.690355	0.01295	-0.937737	6.63435e-06	-0.843864	0.000558821
ENSMUSG00000038546	56705	Ranbp9	black	-0.8857	0.000126447	-0.922831	1.89141e-05	-0.940363	5.37252e-06
ENSMUSG00000026792	227738	Lrsam1	black	-0.8699	0.000234998	-0.894021	8.79124e-05	-0.899519	6.80021e-05
ENSMUSG00000026778	18761	Prkcq	black	-0.818997	0.00111935	-0.925287	1.61577e-05	-0.89499	8.41092e-05
ENSMUSG00000028559	100273	Osbpl9	black	-0.988634	1.46561e-09	-0.976127	5.8677e-08	-0.977373	4.49666e-08
ENSMUSG00000024096	19765	Ralbp1	black	-0.744476	0.00548175	-0.847847	0.000494553	-0.88132	0.000151439
ENSMUSG00000035601	69934	Trmt10b	black	-0.769511	0.00342736	-0.854585	0.000399055	-0.808004	0.00147377
ENSMUSG00000039262	227723	Prrc2b	black	-0.650318	0.0220428	-0.935881	7.65968e-06	-0.855761	0.000383966
ENSMUSG00000043510	100900	Hscb	black	-0.743485	0.00557871	-0.895775	8.11216e-05	-0.891755	9.73392e-05
ENSMUSG00000032121	66279	Tmem218	black	-0.644701	0.0236152	-0.946467	3.16379e-06	-0.842134	0.00058867
ENSMUSG00000053600	224691	Zfp472	black	-0.745542	0.00537892	-0.857613	0.000361117	-0.889056	0.000109578
ENSMUSG00000038954	109115	Supt3	black	-0.509869	0.0903713	-0.742439	0.00568245	-0.773495	0.00316408
ENSMUSG00000020091	13688	Eif4ebp2	black	-0.910676	3.8487e-05	-0.98141	1.69476e-08	-0.957848	9.76354e-07
ENSMUSG00000001930	22371	Vwf	black	-0.711302	0.00948944	-0.95542	1.28652e-06	-0.933941	8.86116e-06
ENSMUSG00000056493	17425	Foxk1	black	-0.883357	0.000139374	-0.82261	0.00101855	-0.937294	6.86864e-06
ENSMUSG00000025723	68039	Nmb	black	-0.621179	0.0310933	-0.887572	0.000116802	-0.779674	0.00278655
ENSMUSG00000029670	71777	Ing3	black	-0.664875	0.0183238	-0.944525	3.76822e-06	-0.866079	0.000269782
ENSMUSG00000002803	399566	Btbd6	black	-0.77918	0.00281542	-0.954091	1.48666e-06	-0.877765	0.000174437
ENSMUSG00000031969	66948	Acad8	black	-0.937464	6.77806e-06	-0.970513	1.67087e-07	-0.932798	9.63554e-06
ENSMUSG00000052861	330355	Dnah6	black	-0.579318	0.0483824	-0.822125	0.00103167	-0.767805	0.00354501
ENSMUSG00000052534	18514	Pbx1	black	-0.622907	0.0304926	-0.864244	0.000287851	-0.820665	0.00107191
ENSMUSG00000085438	66602	1700020I14Rik	black	-0.907534	4.55016e-05	-0.957734	9.89431e-07	-0.902129	5.98872e-05
ENSMUSG00000034235	78787	Usp54	black	-0.689429	0.0131218	-0.913503	3.29294e-05	-0.834932	0.000726422
ENSMUSG00000037221	68929	Mospd3	black	-0.719154	0.00838926	-0.944047	3.93027e-06	-0.863514	0.000295288
ENSMUSG00000037355	71101	Uvssa	black	-0.74549	0.00538393	-0.901545	6.16333e-05	-0.909534	4.09308e-05
ENSMUSG00000027630	81004	Tbl1xr1	black	-0.910585	3.8678e-05	-0.984701	6.43454e-09	-0.95044	2.16606e-06
ENSMUSG00000039357	73068	Fut11	black	-0.90982	4.03069e-05	-0.971253	1.47319e-07	-0.956889	1.09073e-06
ENSMUSG00000101731	320069	3830432H09Rik	black	-0.612212	0.0343481	-0.909168	4.17384e-05	-0.959171	8.34281e-07
ENSMUSG00000021054	81535	Sgpp1	black	-0.980318	2.2505e-08	-0.996244	5.84951e-12	-0.978147	3.78416e-08
ENSMUSG00000013419	270210	Zfp651	black	-0.565004	0.0555944	-0.870726	0.000227965	-0.832476	0.000778685
ENSMUSG00000034160	108155	Ogt	black	-0.584147	0.0461054	-0.884746	0.000131591	-0.817921	0.0011508
ENSMUSG00000069633	69129	Pex11g	black	-0.60576	0.0368357	-0.821661	0.00104432	-0.817444	0.00116495
ENSMUSG00000020776	217335	Fbf1	black	-0.724939	0.00764194	-0.958875	8.64555e-07	-0.901956	6.03993e-05
ENSMUSG00000026986	140483	Hnmt	black	-0.780739	0.00272514	-0.940947	5.11965e-06	-0.887835	0.000115497
ENSMUSG00000020600	328059	Slc7a15	black	-0.541803	0.0688253	-0.896038	8.014e-05	-0.877181	0.000178462
ENSMUSG00000066687	235320	Zbtb16	black	-0.86124	0.000319441	-0.935358	7.96982e-06	-0.891281	9.94081e-05
ENSMUSG00000021468	268656	Sptlc1	black	-0.864799	0.000282284	-0.984139	7.69799e-09	-0.921335	2.0766e-05
ENSMUSG00000038886	140481	Man2a2	black	-0.992538	1.79887e-10	-0.99879	2.03853e-14	-0.998843	1.6278e-14
ENSMUSG00000035944	239570	Ttc38	black	-0.902262	5.94936e-05	-0.977228	4.64161e-08	-0.895137	8.35411e-05
ENSMUSG00000043614	194309	Vps37d	black	-0.563449	0.0564206	-0.91377	3.24394e-05	-0.811746	0.00134468
ENSMUSG00000096233	236069	Gm13238	black	-0.676826	0.0156324	-0.811377	0.00135698	-0.818798	0.00112511
ENSMUSG00000034800	72180	Zfp661	black	-0.77367	0.00315289	-0.931277	1.07488e-05	-0.871101	0.000224827
ENSMUSG00000063193	217304	Cd300lb	black	-0.972784	1.1235e-07	-0.989423	1.024e-09	-0.996296	5.45866e-12
ENSMUSG00000022562	75475	Oplah	black	-0.61347	0.0338772	-0.914572	3.10017e-05	-0.894517	8.59475e-05
ENSMUSG00000047388	234776	Atmin	black	-0.652955	0.0213315	-0.911579	3.66369e-05	-0.851788	0.000436781
ENSMUSG00000030731	20981	Syt3	black	-0.820049	0.00108923	-0.953623	1.56279e-06	-0.889992	0.000105204
ENSMUSG00000039084	12643	Chad	black	-0.701612	0.0109913	-0.933606	9.08268e-06	-0.970912	1.56189e-07
ENSMUSG00000000266	23947	Mid2	black	-0.646085	0.0232204	-0.909638	4.07018e-05	-0.867763	0.00025399
ENSMUSG00000085975	102636022	Gm13572	black	-0.581907	0.0471518	-0.883001	0.00014143	-0.863457	0.000295878
ENSMUSG00000054499	67379	Dedd2	black	-0.633926	0.0268569	-0.975526	6.63761e-08	-0.951866	1.87656e-06
ENSMUSG00000025355	58223	Mmp19	black	-0.708593	0.00989289	-0.886557	0.000121956	-0.863769	0.000292673
ENSMUSG00000057706	108797	Mex3b	black	-0.752029	0.00478417	-0.965892	3.43288e-07	-0.932078	1.01503e-05
ENSMUSG00000060029	321014	4930473A02Rik	black	-0.927374	1.40739e-05	-0.937652	6.67876e-06	-0.967084	2.87948e-07
ENSMUSG00000004319	12725	Clcn3	black	-0.885478	0.000127626	-0.961332	6.3795e-07	-0.945249	3.53311e-06
ENSMUSG00000040189	211535	Ccdc114	black	-0.579383	0.0483509	-0.78263	0.00261859	-0.806202	0.00153928
ENSMUSG00000048200	213573	Cracr2b	black	-0.894321	8.67201e-05	-0.997643	5.70756e-13	-0.996772	2.74697e-12
ENSMUSG00000029621	56443	Arpc1a	black	-0.726838	0.00740789	-0.912514	3.47965e-05	-0.860664	0.000325803
ENSMUSG00000049287	216792	Iba57	black	-0.575806	0.0500867	-0.843075	0.000572285	-0.79041	0.00221335
ENSMUSG00000036769	72404	Wdr44	black	-0.940217	5.43695e-06	-0.991723	3.01739e-10	-0.947864	2.77865e-06
ENSMUSG00000073888	20301	Ccl27a	black	-0.881879	0.000148051	-0.949353	2.40995e-06	-0.886723	0.000121101
ENSMUSG00000059839	408067	Zfp874b	black	-0.912391	3.50358e-05	-0.947476	2.88169e-06	-0.935412	7.93762e-06
ENSMUSG00000029571	71900	Tmem106b	black	-0.763062	0.00388828	-0.92439	1.71248e-05	-0.922364	1.94773e-05
ENSMUSG00000092528	627984	Nlrp1c-ps	black	-0.765626	0.0036997	-0.947157	2.96862e-06	-0.907631	4.52722e-05
ENSMUSG00000000056	67608	Narf	black	-0.833811	0.000749925	-0.946767	3.07778e-06	-0.92313	1.85597e-05
ENSMUSG00000040423	381305	Rc3h1	black	-0.595175	0.0411911	-0.955967	1.21056e-06	-0.919975	2.2571e-05
ENSMUSG00000054008	15531	Ndst1	black	-0.894335	8.66651e-05	-0.968761	2.22315e-07	-0.934288	8.6361e-06
ENSMUSG00000018470	16499	Kcnab3	black	-0.900952	6.34469e-05	-0.994996	2.44951e-11	-0.911458	3.68814e-05
ENSMUSG00000029577	117146	Ube3b	black	-0.70371	0.0106521	-0.917885	2.55849e-05	-0.881235	0.000151961
ENSMUSG00000041607	17196	Mbp	black	-0.912379	3.50578e-05	-0.945031	3.60276e-06	-0.964797	4.01297e-07
ENSMUSG00000039382	54636	Wdr45	black	-0.8781	0.000172156	-0.976677	5.22671e-08	-0.953534	1.57764e-06
ENSMUSG00000035596	77582	Mboat7	black	-0.861445	0.000317211	-0.937872	6.56413e-06	-0.921035	2.11535e-05
ENSMUSG00000024197	66905	Plin3	black	-0.90716	4.63996e-05	-0.986559	3.37801e-09	-0.972687	1.14348e-07
ENSMUSG00000039354	54380	Smarcal1	black	-0.851688	0.00043818	-0.846312	0.000518613	-0.951717	1.90514e-06
ENSMUSG00000026842	11350	Abl1	black	-0.993612	8.28594e-11	-0.997489	7.83104e-13	-0.972839	1.1123e-07
ENSMUSG00000021514	170936	Zfp369	black	-0.909571	4.08483e-05	-0.959985	7.55427e-07	-0.929763	1.19553e-05
ENSMUSG00000021767	54169	Kat6b	black	-0.591982	0.0425738	-0.951271	1.99337e-06	-0.876073	0.000186297
ENSMUSG00000097048	72012	1600020E01Rik	black	-0.566236	0.0549456	-0.947368	2.91088e-06	-0.952658	1.72952e-06
ENSMUSG00000028088	14263	Fmo5	black	-0.959989	7.55039e-07	-0.993088	1.22776e-10	-0.988395	1.62555e-09
ENSMUSG00000021902	71838	Phf7	black	-0.487673	0.107771	-0.847344	0.000502348	-0.828041	0.000880385
ENSMUSG00000008730	15257	Hipk1	black	-0.928996	1.26059e-05	-0.98826	1.72245e-09	-0.97163	1.38008e-07
ENSMUSG00000046876	20238	Atxn1	black	-0.789073	0.00227931	-0.934413	8.5558e-06	-0.86011	0.000332008
ENSMUSG00000024163	30957	Mapk8ip3	black	-0.601102	0.0387097	-0.880608	0.000155842	-0.81637	0.00119732
ENSMUSG00000044749	76184	Abca6	black	-0.809739	0.00141279	-0.983054	1.06978e-08	-0.958931	8.58777e-07
ENSMUSG00000039686	227693	Zer1	black	-0.935708	7.76111e-06	-0.981276	1.75657e-08	-0.970925	1.55849e-07
ENSMUSG00000052331	329154	Ankrd44	black	-0.94826	2.67643e-06	-0.995662	1.20073e-11	-0.968178	2.43633e-07
ENSMUSG00000032842	224814	Abcc10	black	-0.687823	0.0134239	-0.945676	3.39998e-06	-0.959094	8.42105e-07
ENSMUSG00000003872	22342	Lin7b	black	-0.872681	0.000211963	-0.95397	1.50602e-06	-0.906724	4.74627e-05
ENSMUSG00000039976	207592	Tbc1d16	black	-0.912885	3.40866e-05	-0.966569	3.10912e-07	-0.97276	1.12838e-07
ENSMUSG00000030180	214899	Kdm5a	black	-0.741827	0.00574373	-0.954	1.50124e-06	-0.912644	3.45471e-05
ENSMUSG00000071042	240168	Rasgrp3	black	-0.985906	4.27724e-09	-0.987673	2.19591e-09	-0.992039	2.48517e-10
ENSMUSG00000045659	233765	Plekha7	black	-0.815806	0.00121459	-0.94766	2.83231e-06	-0.917936	2.55071e-05
ENSMUSG00000063870	107932	Chd4	black	-0.867528	0.000256145	-0.958229	9.33588e-07	-0.942403	4.52983e-06
ENSMUSG00000038515	66790	Grtp1	black	-0.825034	0.000954956	-0.921986	1.99432e-05	-0.906489	4.80457e-05
ENSMUSG00000061898	57782	Rbak	black	-0.6227	0.0305643	-0.935508	7.87975e-06	-0.880714	0.000155184
ENSMUSG00000040957	63955	Cables1	black	-0.905874	4.95936e-05	-0.988481	1.56682e-09	-0.966354	3.20935e-07
ENSMUSG00000068874	20341	Selenbp1	black	-0.940069	5.50321e-06	-0.974096	8.79502e-08	-0.966898	2.96092e-07
ENSMUSG00000055991	22757	Zkscan5	black	-0.709032	0.00982672	-0.828896	0.000860028	-0.828642	0.000866034
ENSMUSG00000040146	71746	Rgl3	black	-0.910108	3.96878e-05	-0.921403	2.06781e-05	-0.98126	1.76413e-08
ENSMUSG00000028211	60599	Trp53inp1	black	-0.930476	1.13747e-05	-0.984972	5.88706e-09	-0.976041	5.97239e-08
ENSMUSG00000061455	67727	Stx17	black	-0.938177	6.40786e-06	-0.95553	1.27097e-06	-0.981332	1.73035e-08
ENSMUSG00000038545	66515	Cul7	black	-0.978297	3.65683e-08	-0.988055	1.87739e-09	-0.977203	4.66701e-08
ENSMUSG00000026176	227292	Ctdsp1	black	-0.907686	4.51418e-05	-0.942584	4.46073e-06	-0.982684	1.19087e-08
ENSMUSG00000057777	23937	Mab21l2	black	-0.738828	0.0060516	-0.997798	4.06593e-13	-0.997798	4.06593e-13
ENSMUSG00000026365	12628	Cfh	black	-0.986137	3.94011e-09	-0.99876	2.29993e-14	-0.998663	3.355e-14
ENSMUSG00000083282	56464	Ctsf	black	-0.992851	1.45353e-10	-0.997373	9.80283e-13	-0.998442	7.21505e-14
ENSMUSG00000015542	66176	Nat9	black	-0.897126	7.61781e-05	-0.949234	2.43789e-06	-0.873965	0.000201939
ENSMUSG00000100153	434233	Ppp1ccb	black	-0.871046	0.000225284	-0.95891	8.60943e-07	-0.924751	1.67299e-05
ENSMUSG00000039219	94246	Arid4b	black	-0.831166	0.000807735	-0.946228	3.2337e-06	-0.936752	7.16364e-06
ENSMUSG00000005142	17159	Man2b1	black	-0.980563	2.11476e-08	-0.997664	5.45494e-13	-0.996265	5.69168e-12
ENSMUSG00000035666	269252	Gtf3c4	black	-0.734522	0.00651508	-0.946943	3.02811e-06	-0.962103	5.77587e-07
ENSMUSG00000023348	22051	Trip6	black	-0.634682	0.0266194	-0.911058	3.76951e-05	-0.923889	1.76839e-05
ENSMUSG00000016087	14247	Fli1	black	-0.998404	8.13725e-14	-0.995765	1.06556e-11	-0.991773	2.92777e-10
ENSMUSG00000049744	76117	Arhgap15	black	-0.86574	0.000273047	-0.994997	2.44753e-11	-0.988811	1.35565e-09
ENSMUSG00000024422	69192	Dhx16	black	-0.738081	0.00613016	-0.869823	0.000235666	-0.877335	0.000177394
ENSMUSG00000021703	218442	Serinc5	black	-0.979266	2.91477e-08	-0.998249	1.29214e-13	-0.995998	8.03193e-12
ENSMUSG00000035597	328110	Prpf39	black	-0.708663	0.00988229	-0.92986	1.18744e-05	-0.911942	3.5914e-05
ENSMUSG00000023923	72238	Tbc1d5	black	-0.703252	0.0107256	-0.913161	3.35672e-05	-0.882436	0.000144737
ENSMUSG00000040669	13619	Phc1	black	-0.663861	0.0185667	-0.954741	1.38596e-06	-0.919844	2.27513e-05
ENSMUSG00000024298	208292	Zfp871	black	-0.824868	0.000959212	-0.977799	4.09211e-08	-0.922086	1.98195e-05
ENSMUSG00000048965	244238	Mrgpre	black	-0.919771	2.28531e-05	-0.985424	5.05656e-09	-0.960433	7.14613e-07
ENSMUSG00000094441	77652	Zfp955a	black	-0.56968	0.0531608	-0.776692	0.00296423	-0.83139	0.000802705
ENSMUSG00000049285	330216	Mblac1	black	-0.833217	0.000762612	-0.918081	2.52887e-05	-0.888144	0.000113977
ENSMUSG00000024421	16774	Lama3	black	-0.943208	4.22788e-06	-0.982183	1.37245e-08	-0.97018	1.76644e-07
ENSMUSG00000014303	83396	Glis2	black	-0.629572	0.0282539	-0.916357	2.79814e-05	-0.884825	0.000131157
ENSMUSG00000024240	13831	Epc1	black	-0.624618	0.0299062	-0.94906	2.47928e-06	-0.920106	2.23924e-05
ENSMUSG00000034593	17918	Myo5a	black	-0.957184	1.05452e-06	-0.996656	3.27648e-12	-0.993407	9.69992e-11
ENSMUSG00000038967	18604	Pdk2	black	-0.953667	1.55547e-06	-0.992212	2.22655e-10	-0.983067	1.06574e-08
ENSMUSG00000025730	224624	Rab40c	black	-0.828488	0.000869685	-0.931419	1.06404e-05	-0.907244	4.61972e-05
ENSMUSG00000041849	239319	Card6	black	-0.88055	0.000156209	-0.947652	2.83448e-06	-0.924827	1.66476e-05
ENSMUSG00000039100	223455	2020-03-06	black	-0.963258	4.95764e-07	-0.955375	1.29291e-06	-0.981348	1.72297e-08
ENSMUSG00000017466	21858	Timp2	black	-0.971352	1.44833e-07	-0.99493	2.61554e-11	-0.992995	1.31309e-10
ENSMUSG00000099032	100039596	Tcf24	black	-0.700792	0.011126	-0.941204	5.01117e-06	-0.900598	6.45486e-05
ENSMUSG00000095253	240064	Zfp799	black	-0.747087	0.00523244	-0.944117	3.90621e-06	-0.912374	3.50687e-05
ENSMUSG00000020961	108800	Ston2	black	-0.803747	0.00163204	-0.978757	3.28771e-08	-0.971217	1.48237e-07
ENSMUSG00000030330	28019	Ing4	black	-0.966829	2.99149e-07	-0.995029	2.37125e-11	-0.995959	8.42585e-12
ENSMUSG00000033624	319518	Pdpr	black	-0.770169	0.00338276	-0.990646	5.5534e-10	-0.992784	1.52204e-10
ENSMUSG00000022253	68646	Nadk2	black	-0.937194	6.92194e-06	-0.990802	5.10449e-10	-0.996525	3.96895e-12
ENSMUSG00000028093	66659	Acp6	black	-0.931032	1.0937e-05	-0.970073	1.79791e-07	-0.948325	2.66003e-06
ENSMUSG00000032425	71640	Zfp949	black	-0.805493	0.00156563	-0.983475	9.43923e-09	-0.952639	1.73288e-06
ENSMUSG00000073437	654822	D330041H03Rik	black	-0.811818	0.00134225	-0.911069	3.76728e-05	-0.898217	7.23587e-05
ENSMUSG00000054723	106639	Vmac	black	-0.884243	0.000134368	-0.968421	2.3456e-07	-0.947796	2.79654e-06
ENSMUSG00000083140	278181	Gm5073	black	-0.695519	0.0120219	-0.904496	5.32047e-05	-0.898777	7.04576e-05
ENSMUSG00000026571	74106	Dcaf6	black	-0.96365	4.70212e-07	-0.974723	7.7889e-08	-0.981799	1.52569e-08
ENSMUSG00000036377	320827	C530008M17Rik	black	-0.634768	0.0265925	-0.890482	0.000102971	-0.974227	8.57767e-08
ENSMUSG00000034949	103406	Zfr2	black	-0.749937	0.00497028	-0.905141	5.14882e-05	-0.892543	9.39738e-05
ENSMUSG00000038533	12396	Cbfa2t2	black	-0.92967	1.20321e-05	-0.96298	5.14541e-07	-0.938466	6.2624e-06
ENSMUSG00000033898	545366	Cfhr2	black	-0.960193	7.36275e-07	-0.988227	1.74615e-09	-0.978803	3.25231e-08
ENSMUSG00000018800	217265	Abca5	black	-0.781402	0.00268743	-0.956974	1.08025e-06	-0.985038	5.75841e-09
ENSMUSG00000024913	16973	Lrp5	black	-0.899206	6.90284e-05	-0.937114	6.96538e-06	-0.938769	6.113e-06
ENSMUSG00000005580	11515	Adcy9	black	-0.923564	1.80544e-05	-0.959081	8.43339e-07	-0.938701	6.14644e-06
ENSMUSG00000015766	13860	Eps8	black	-0.986705	3.19951e-09	-0.970442	1.69089e-07	-0.988792	1.36723e-09
ENSMUSG00000016520	140887	Lnx2	black	-0.935926	7.63347e-06	-0.894991	8.41051e-05	-0.967474	2.71481e-07
ENSMUSG00000036450	319594	Hif1an	black	-0.952582	1.74316e-06	-0.937279	6.87653e-06	-0.982683	1.19128e-08
ENSMUSG00000038637	70552	Lrrc56	black	-0.659335	0.0196803	-0.939355	5.83206e-06	-0.904549	5.30622e-05
ENSMUSG00000029461	319604	Fam168a	black	-0.963061	5.09025e-07	-0.991468	3.51002e-10	-0.977629	4.25015e-08
ENSMUSG00000031613	15446	Hpgd	black	-0.989532	9.72775e-10	-0.99675	2.83998e-12	-0.99514	2.1187e-11
ENSMUSG00000033610	75735	Pank1	black	-0.977579	4.2974e-08	-0.9918	2.87969e-10	-0.995206	1.97913e-11
ENSMUSG00000024600	225579	Slc27a6	black	-0.828253	0.000875291	-0.958951	8.56694e-07	-0.965168	3.80874e-07
ENSMUSG00000078676	192160	Casc3	black	-0.815368	0.00122813	-0.895783	8.10907e-05	-0.887143	0.00011896
ENSMUSG00000070822	232875	Zscan18	black	-0.667201	0.0177752	-0.86717	0.000259471	-0.928424	1.31088e-05
ENSMUSG00000035173	213993	Ccdc186	black	-0.833198	0.000763018	-0.933888	8.89596e-06	-0.916347	2.79983e-05
ENSMUSG00000032194	235041	Kank2	black	-0.968311	2.38619e-07	-0.980224	2.30452e-08	-0.946929	3.03199e-06
ENSMUSG00000005034	18749	Prkacb	black	-0.943091	4.27064e-06	-0.980771	2.00493e-08	-0.970009	1.81714e-07
ENSMUSG00000033249	26386	Hsf4	black	-0.635008	0.0265176	-0.969658	1.92473e-07	-0.995532	1.39171e-11
ENSMUSG00000019467	52666	Arhgef25	black	-0.777282	0.00292838	-0.934865	8.27136e-06	-0.905956	4.93845e-05
ENSMUSG00000030711	20887	Sult1a1	black	-0.967632	2.65017e-07	-0.984725	6.3832e-09	-0.975319	6.91962e-08
ENSMUSG00000025217	12234	Btrc	black	-0.6863	0.0137151	-0.936272	7.43347e-06	-0.906708	4.75024e-05
ENSMUSG00000004455	19047	Ppp1cc	black	-0.962285	5.6404e-07	-0.984109	7.77079e-09	-0.975972	6.05853e-08
ENSMUSG00000071547	70021	Nt5dc2	black	-0.957334	1.03634e-06	-0.983593	9.10963e-09	-0.960366	7.20615e-07
ENSMUSG00000052056	228913	Zfp217	black	-0.715081	0.00894736	-0.94383	4.00551e-06	-0.940497	5.31328e-06
ENSMUSG00000079110	12335	Capn3	black	-0.662445	0.0189099	-0.947436	2.89232e-06	-0.922736	1.90273e-05
ENSMUSG00000046329	66972	Slc25a23	black	-0.975246	7.02184e-08	-0.992982	1.32526e-10	-0.989979	7.82558e-10
ENSMUSG00000022893	11504	Adamts1	black	-0.984847	6.13369e-09	-0.976275	5.68864e-08	-0.971488	1.41472e-07
ENSMUSG00000052698	70549	Tln2	black	-0.985292	5.28867e-09	-0.996452	4.3987e-12	-0.994088	5.63133e-11
ENSMUSG00000005893	22026	Nr2c2	black	-0.971782	1.34384e-07	-0.989798	8.55726e-10	-0.986797	3.09028e-09
ENSMUSG00000039477	231861	Tnrc18	black	-0.791501	0.00216061	-0.92319	1.84887e-05	-0.902629	5.84235e-05
ENSMUSG00000010110	56389	Stx5a	black	-0.797941	0.00186853	-0.971715	1.3596e-07	-0.954311	1.45189e-06
ENSMUSG00000027488	20648	Snta1	black	-0.733198	0.00666284	-0.83222	0.000784298	-0.876628	0.000182336
ENSMUSG00000018509	73139	Cenpv	black	-0.908224	4.38811e-05	-0.975594	6.54664e-08	-0.938413	6.28916e-06
ENSMUSG00000004798	29869	Ulk2	black	-0.978243	3.7016e-08	-0.99579	1.0341e-11	-0.988787	1.36972e-09
ENSMUSG00000026925	64436	Inpp5e	black	-0.969419	2.00088e-07	-0.919003	2.3936e-05	-0.941691	4.81109e-06
ENSMUSG00000066406	75547	Akap13	black	-0.865735	0.000273095	-0.990678	5.45923e-10	-0.986208	3.84099e-09
ENSMUSG00000032571	75669	Pik3r4	black	-0.896855	7.71501e-05	-0.995994	8.07415e-12	-0.995002	2.43471e-11
ENSMUSG00000036792	109241	Mbd5	black	-0.716843	0.00870257	-0.964342	4.27631e-07	-0.95031	2.19423e-06
ENSMUSG00000031618	110784	Nr3c2	black	-0.858348	0.000352353	-0.939914	5.57325e-06	-0.917038	2.68926e-05
ENSMUSG00000031834	18709	Pik3r2	black	-0.75137	0.00484219	-0.959956	7.58099e-07	-0.958998	8.51859e-07
ENSMUSG00000035121	382913	Neil2	black	-0.786048	0.00243417	-0.945344	3.50303e-06	-0.89919	6.90833e-05
ENSMUSG00000023912	74011	Slc25a27	black	-0.850391	0.000456617	-0.984859	6.11058e-09	-0.961911	5.92229e-07
ENSMUSG00000026634	52477	Angel2	black	-0.731286	0.00688064	-0.889198	0.000108908	-0.904689	5.26858e-05
ENSMUSG00000027676	51938	Ccdc39	black	-0.637318	0.0258038	-0.923361	1.82901e-05	-0.890319	0.000103708
ENSMUSG00000006676	71472	Usp19	black	-0.88357	0.000138162	-0.965888	3.43515e-07	-0.921584	2.04479e-05
ENSMUSG00000035891	223753	Cerk	black	-0.974056	8.86213e-08	-0.990017	7.67919e-10	-0.993553	8.67616e-11
ENSMUSG00000023826	50873	Prkn	black	-0.766076	0.00366736	-0.919779	2.28415e-05	-0.920008	2.25266e-05
ENSMUSG00000002625	54194	Akap8l	black	-0.884697	0.000131858	-0.967028	2.90377e-07	-0.975765	6.32184e-08
ENSMUSG00000040151	23908	Hs2st1	black	-0.968984	2.14567e-07	-0.982088	1.40906e-08	-0.949998	2.26282e-06
ENSMUSG00000027439	74533	Gzf1	black	-0.931989	1.02159e-05	-0.899074	6.94658e-05	-0.92339	1.82562e-05
ENSMUSG00000032238	19883	Rora	black	-0.908975	4.21706e-05	-0.997055	1.73675e-12	-0.989917	8.069e-10
ENSMUSG00000055137	192136	Sugct	black	-0.679347	0.015104	-0.896553	7.8244e-05	-0.918855	2.4149e-05
ENSMUSG00000028927	18600	Padi2	black	-0.935404	7.94235e-06	-0.992949	1.35603e-10	-0.988094	1.84671e-09
ENSMUSG00000041777	66935	Cir1	black	-0.952109	1.83027e-06	-0.982128	1.39368e-08	-0.969815	1.87602e-07
ENSMUSG00000027365	58800	Trpm7	black	-0.828729	0.00086397	-0.98349	9.39648e-09	-0.971944	1.30599e-07
ENSMUSG00000029765	243743	Plxna4	black	-0.8748	0.00019563	-0.945009	3.60964e-06	-0.933784	8.96476e-06
ENSMUSG00000002455	68879	Prpf6	black	-0.820689	0.00107122	-0.957984	9.6087e-07	-0.946265	3.22291e-06
ENSMUSG00000029647	72587	Pan3	black	-0.752983	0.00470107	-0.884919	0.000130648	-0.88985	0.000105862
ENSMUSG00000047592	381680	Nxpe5	black	-0.997166	1.43388e-12	-0.999231	2.11656e-15	-0.997889	3.28982e-13
ENSMUSG00000096910	100043468	Zfp955b	black	-0.786875	0.00239105	-0.953692	1.55138e-06	-0.927674	1.37923e-05
ENSMUSG00000018750	75580	Zbtb4	black	-0.844435	0.00054923	-0.995466	1.49723e-11	-0.994503	3.91803e-11
ENSMUSG00000002992	11813	Apoc2	black	-0.971961	1.30204e-07	-0.995032	2.36356e-11	-0.987095	2.75862e-09
ENSMUSG00000059142	240041	Zfp945	black	-0.81148	0.00135355	-0.915096	3.00898e-05	-0.928884	1.27026e-05
ENSMUSG00000020598	319504	Nrcam	black	-0.98102	1.87929e-08	-0.996874	2.33721e-12	-0.993998	6.07229e-11
ENSMUSG00000034216	228545	Vps18	black	-0.921831	2.01362e-05	-0.98454	6.77685e-09	-0.989239	1.11622e-09
ENSMUSG00000017858	245866	Ift52	black	-0.862942	0.000301227	-0.949945	2.27472e-06	-0.925598	1.58318e-05
ENSMUSG00000006611	15216	Hfe	black	-0.981118	1.83122e-08	-0.996868	2.3596e-12	-0.995768	1.06184e-11
ENSMUSG00000020647	17977	Ncoa1	black	-0.896108	7.98802e-05	-0.96795	2.5239e-07	-0.969753	1.89524e-07
ENSMUSG00000027291	269338	Vps39	black	-0.924094	1.74538e-05	-0.975552	6.60233e-08	-0.952957	1.67639e-06
ENSMUSG00000044795	327951	Cyb5d1	black	-0.847673	0.000497243	-0.909165	4.17445e-05	-0.955146	1.32584e-06
ENSMUSG00000045287	237847	Rtn4rl1	black	-0.982029	1.43236e-08	-0.991468	3.5097e-10	-0.992133	2.34242e-10
ENSMUSG00000022540	66049	Rogdi	black	-0.892197	9.54406e-05	-0.980267	2.27997e-08	-0.968742	2.2301e-07
ENSMUSG00000019734	353499	Tmc4	black	-0.636692	0.0259957	-0.875048	0.000193783	-0.904291	5.37574e-05
ENSMUSG00000028248	66625	Pnisr	black	-0.788349	0.00231566	-0.951001	2.04826e-06	-0.947734	2.81274e-06
ENSMUSG00000032827	243725	Ppp1r9a	black	-0.935935	7.62816e-06	-0.982183	1.37254e-08	-0.974183	8.64912e-08
ENSMUSG00000070858	381633	Gm1673	black	-0.956127	1.18909e-06	-0.988712	1.41601e-09	-0.977309	4.56095e-08
ENSMUSG00000085795	353310	Zfp703	black	-0.886778	0.00012082	-0.975331	6.90286e-08	-0.975402	6.80617e-08
ENSMUSG00000045757	233893	Zfp764	black	-0.933033	9.47253e-06	-0.936222	7.46252e-06	-0.982779	1.15885e-08
ENSMUSG00000068966	241311	Zbtb34	black	-0.785205	0.00247872	-0.970905	1.56387e-07	-0.969047	2.12419e-07
ENSMUSG00000026349	72949	Ccnt2	black	-0.803447	0.00164365	-0.923147	1.85392e-05	-0.918579	2.45512e-05
ENSMUSG00000036985	208884	Zdhhc9	black	-0.960321	7.24584e-07	-0.973339	1.01451e-07	-0.989772	8.6642e-10
ENSMUSG00000066306	101706	Numa1	black	-0.988665	1.44566e-09	-0.997649	5.63406e-13	-0.992739	1.57027e-10
ENSMUSG00000031925	270118	Maml2	black	-0.949355	2.40937e-06	-0.985978	4.16937e-09	-0.984718	6.39825e-09
ENSMUSG00000028445	69638	Enho	black	-0.94542	3.47918e-06	-0.998004	2.48693e-13	-0.990061	7.51216e-10
ENSMUSG00000030060	232210	Hmces	black	-0.962986	5.14139e-07	-0.99256	1.77322e-10	-0.985776	4.47726e-09
ENSMUSG00000048534	270152	Jaml	black	-0.831727	0.000795197	-0.969292	2.04255e-07	-0.968277	2.39885e-07
ENSMUSG00000040652	18247	Oaz2	black	-0.830375	0.000825668	-0.985356	5.17576e-09	-0.976507	5.41781e-08
ENSMUSG00000015882	209707	Lcorl	black	-0.812717	0.00131264	-0.911208	3.73894e-05	-0.911219	3.73661e-05
ENSMUSG00000020823	74136	Sec14l1	black	-0.915016	3.02281e-05	-0.984639	6.56548e-09	-0.981475	1.66558e-08
ENSMUSG00000029408	56325	Abcb9	black	-0.79391	0.00204752	-0.865743	0.000273018	-0.943181	4.23774e-06
ENSMUSG00000058729	72568	Lin9	black	-0.906398	4.82721e-05	-0.976994	4.8834e-08	-0.961095	6.57558e-07
ENSMUSG00000040710	20452	St8sia4	black	-0.992124	2.35565e-10	-0.997631	5.85041e-13	-0.997728	4.75356e-13
ENSMUSG00000036022	78755	Fam122b	black	-0.677262	0.01554	-0.941859	4.74368e-06	-0.946429	3.17487e-06
ENSMUSG00000022574	223646	Naprt	black	-0.868306	0.000249058	-0.902569	5.85981e-05	-0.941134	5.04075e-06
ENSMUSG00000057729	19152	Prtn3	black	-0.955427	1.28542e-06	-0.99655	3.82436e-12	-0.993744	7.47079e-11
ENSMUSG00000074217	70134	2210011C24Rik	black	-0.898651	7.08815e-05	-0.962919	5.18791e-07	-0.956634	1.12288e-06
ENSMUSG00000020485	20922	Supt4a	black	-0.97833	3.62946e-08	-0.990764	5.21064e-10	-0.967344	2.7688e-07
ENSMUSG00000032528	22354	Vipr1	black	-0.819173	0.00111425	-0.914611	3.09329e-05	-0.921743	2.02476e-05
ENSMUSG00000048720	209478	Tbc1d12	black	-0.66591	0.0180782	-0.929347	1.23046e-05	-0.949281	2.42684e-06
ENSMUSG00000051285	319263	Pcmtd1	black	-0.961044	6.61746e-07	-0.988309	1.68695e-09	-0.986819	3.06442e-09
ENSMUSG00000079227	12774	Ccr5	black	-0.990919	4.79006e-10	-0.996906	2.21987e-12	-0.995995	8.06372e-12
ENSMUSG00000021549	218397	Rasa1	black	-0.991168	4.1698e-10	-0.994641	3.44923e-11	-0.997256	1.21868e-12
ENSMUSG00000018126	207495	Baiap2l2	black	-0.96576	3.49932e-07	-0.986568	3.36685e-09	-0.966283	3.24265e-07
ENSMUSG00000031996	11804	Aplp2	black	-0.993355	1.00918e-10	-0.993538	8.77591e-11	-0.99693	2.13553e-12
ENSMUSG00000020453	56218	Patz1	black	-0.884879	0.000130862	-0.951289	1.98976e-06	-0.946812	3.06506e-06
ENSMUSG00000012640	69930	Zfp715	black	-0.953089	1.65328e-06	-0.994921	2.63966e-11	-0.994712	3.22714e-11
ENSMUSG00000033697	223666	Arhgap39	black	-0.922727	1.90374e-05	-0.980725	2.02883e-08	-0.970113	1.78621e-07
ENSMUSG00000049676	320225	Catsperg1	black	-0.92983	1.18992e-05	-0.883444	0.00013888	-0.992346	2.04202e-10
ENSMUSG00000060012	16554	Kif13b	black	-0.970909	1.56256e-07	-0.99812	1.84446e-13	-0.992356	2.02881e-10
ENSMUSG00000078429	52468	Ctdsp2	black	-0.971175	1.4933e-07	-0.990455	6.14112e-10	-0.989874	8.244e-10
ENSMUSG00000025184	52013	R3hcc1l	black	-0.758304	0.0042575	-0.954529	1.41821e-06	-0.987919	1.98649e-09
ENSMUSG00000034522	380912	Zfp395	black	-0.925135	1.63186e-05	-0.962362	5.58396e-07	-0.969315	2.03499e-07
ENSMUSG00000039967	30046	Zfp292	black	-0.79734	0.00189442	-0.954519	1.41968e-06	-0.962903	5.19878e-07
ENSMUSG00000001138	94218	Cnnm3	black	-0.937781	6.61136e-06	-0.984822	6.1845e-09	-0.983172	1.03315e-08
ENSMUSG00000031706	19724	Rfx1	black	-0.883762	0.000137068	-0.992832	1.4725e-10	-0.969545	1.96064e-07
ENSMUSG00000060510	77519	Zfp266	black	-0.962438	5.52841e-07	-0.989931	8.01591e-10	-0.956734	1.11022e-06
ENSMUSG00000022884	13682	Eif4a2	black	-0.986915	2.95537e-09	-0.990894	4.85679e-10	-0.994165	5.2746e-11
ENSMUSG00000021286	68520	Zfyve21	black	-0.950824	2.08496e-06	-0.994876	2.75668e-11	-0.99331	1.04361e-10
ENSMUSG00000030083	80283	Abtb1	black	-0.903081	5.71241e-05	-0.991013	4.5469e-10	-0.993122	1.19801e-10
ENSMUSG00000018395	16568	Kif3a	black	-0.996103	7.02799e-12	-0.998684	3.10719e-14	-0.998789	2.04842e-14
ENSMUSG00000004933	17179	Matk	black	-0.983731	8.73391e-09	-0.998887	1.3404e-14	-0.998942	1.04203e-14
ENSMUSG00000074749	228730	Kiz	black	-0.901417	6.2019e-05	-0.998262	1.24346e-13	-0.998531	5.37323e-14
ENSMUSG00000021271	72805	Zfp839	black	-0.723751	0.00779118	-0.916165	2.8295e-05	-0.919636	2.30404e-05
ENSMUSG00000060512	76261	0610040J01Rik	black	-0.923656	1.79494e-05	-0.983558	9.20767e-09	-0.978812	3.24557e-08
ENSMUSG00000034041	17095	Lyl1	black	-0.861362	0.000318111	-0.9485	2.61595e-06	-0.966812	2.9991e-07
ENSMUSG00000015357	270166	Clpx	black	-0.874037	0.000201393	-0.961786	6.01834e-07	-0.98072	2.03136e-08
ENSMUSG00000052407	320226	Ccdc171	black	-0.810601	0.0013832	-0.925245	1.62011e-05	-0.913957	3.20998e-05
ENSMUSG00000037936	20778	Scarb1	black	-0.946162	3.25313e-06	-0.980564	2.11455e-08	-0.978014	3.89926e-08
ENSMUSG00000028743	110198	Akr7a5	black	-0.682963	0.0143695	-0.93887	6.0639e-06	-0.952012	1.8486e-06
ENSMUSG00000013622	381629	Atraid	black	-0.941891	4.73079e-06	-0.987348	2.49971e-09	-0.988868	1.32156e-09
ENSMUSG00000048779	233571	P2ry6	black	-0.932068	1.01576e-05	-0.990959	4.68509e-10	-0.987226	2.62164e-09
ENSMUSG00000028943	56226	Espn	black	-0.832433	0.000779627	-0.947716	2.81754e-06	-0.946153	3.25609e-06
ENSMUSG00000091764	636741	Zfp964	black	-0.847125	0.000505756	-0.929651	1.2048e-05	-0.924195	1.73406e-05
ENSMUSG00000044629	380686	Cnrip1	black	-0.990797	5.11931e-10	-0.996206	6.15436e-12	-0.997467	8.17426e-13
ENSMUSG00000051043	70355	Gprc5c	black	-0.864837	0.000281906	-0.986812	3.07272e-09	-0.988394	1.6265e-09
ENSMUSG00000032594	27399	Ip6k1	black	-0.98273	1.1754e-08	-0.99059	5.71844e-10	-0.992983	1.32448e-10
ENSMUSG00000036278	107227	Macrod1	black	-0.936259	7.44094e-06	-0.993004	1.30472e-10	-0.996636	3.37146e-12
ENSMUSG00000053559	207818	Smagp	black	-0.981738	1.5514e-08	-0.992857	1.44677e-10	-0.993816	7.05072e-11
ENSMUSG00000044708	16513	Kcnj10	black	-0.991752	2.96477e-10	-0.995422	1.57072e-11	-0.995722	1.12042e-11
ENSMUSG00000029004	69188	Kmt2e	black	-0.941689	4.81215e-06	-0.98627	3.75522e-09	-0.986623	3.29924e-09
ENSMUSG00000021066	73991	Atl1	black	-0.915222	2.98745e-05	-0.983574	9.16209e-09	-0.973902	9.12704e-08
ENSMUSG00000006235	13857	Epor	black	-0.994314	4.63464e-11	-0.996827	2.51881e-12	-0.997603	6.20465e-13
ENSMUSG00000038025	18676	Phf2	black	-0.922193	1.96872e-05	-0.961404	6.32108e-07	-0.96055	7.04189e-07
ENSMUSG00000018427	77864	Ypel2	black	-0.973463	9.9127e-08	-0.989573	9.54086e-10	-0.996035	7.67116e-12
ENSMUSG00000053769	217779	Lysmd1	black	-0.924436	1.70742e-05	-0.965499	3.633e-07	-0.956552	1.13337e-06
ENSMUSG00000038520	233204	Tbc1d17	black	-0.996912	2.19856e-12	-0.992621	1.70165e-10	-0.987576	2.28338e-09
ENSMUSG00000025509	66853	Pnpla2	black	-0.994721	3.20131e-11	-0.997856	3.55651e-13	-0.997831	3.76554e-13
ENSMUSG00000036568	210982	Bicral	black	-0.983276	1.00185e-08	-0.998066	2.12572e-13	-0.975569	6.5797e-08
ENSMUSG00000001665	103140	Gstt3	black	-0.978857	3.21178e-08	-0.994374	4.39907e-11	-0.993446	9.42041e-11
ENSMUSG00000056458	26448	Mok	black	-0.922669	1.91077e-05	-0.987343	2.50496e-09	-0.982332	1.31621e-08
ENSMUSG00000004552	13034	Ctse	black	-0.977707	4.17712e-08	-0.995945	8.57556e-12	-0.996409	4.67217e-12
ENSMUSG00000067928	240034	Zfp760	black	-0.886074	0.000124472	-0.980353	2.23101e-08	-0.97167	1.37049e-07
ENSMUSG00000074212	70604	Dnajb14	black	-0.9593	8.21309e-07	-0.985454	5.0051e-09	-0.991755	2.96044e-10
ENSMUSG00000004056	11652	Akt2	black	-0.919937	2.26234e-05	-0.978922	3.16284e-08	-0.979404	2.81961e-08
ENSMUSG00000036438	12314	Calm2	black	-0.971111	1.50978e-07	-0.989225	1.12328e-09	-0.9946	3.58434e-11
ENSMUSG00000024180	60455	Tmem8	black	-0.98238	1.29871e-08	-0.993242	1.09754e-10	-0.992229	2.20362e-10
ENSMUSG00000037224	231125	Zfyve28	black	-0.991827	2.83207e-10	-0.988693	1.428e-09	-0.996731	2.92247e-12
ENSMUSG00000027435	17064	Cd93	black	-0.888659	0.000111478	-0.986167	3.89797e-09	-0.985759	4.50355e-09
ENSMUSG00000072946	77219	Ptgr2	black	-0.978507	3.48432e-08	-0.993802	7.13053e-11	-0.995589	1.30554e-11
ENSMUSG00000030865	70261	Chp2	black	-0.972813	1.11758e-07	-0.996205	6.15957e-12	-0.994865	2.78822e-11
ENSMUSG00000037503	214469	Fam168b	black	-0.990864	4.9351e-10	-0.992679	1.63591e-10	-0.991551	3.34235e-10
ENSMUSG00000024193	21652	Phf1	black	-0.866737	0.000263525	-0.967176	2.84003e-07	-0.972629	1.15552e-07
ENSMUSG00000074794	105171	Arrdc3	black	-0.985649	4.67967e-09	-0.996592	3.60134e-12	-0.996196	6.2313e-12
ENSMUSG00000038147	12523	Cd84	black	-0.949331	2.415e-06	-0.959222	8.29158e-07	-0.987526	2.32889e-09
ENSMUSG00000029162	16548	Khk	black	-0.94239	4.535e-06	-0.982689	1.18936e-08	-0.978876	3.19753e-08
ENSMUSG00000028278	52187	Rragd	black	-0.98258	1.22711e-08	-0.988111	1.83374e-09	-0.995325	1.7441e-11
ENSMUSG00000038286	68021	Bphl	black	-0.995456	1.51335e-11	-0.995487	1.4627e-11	-0.998654	3.4671e-14
ENSMUSG00000021690	57748	Jmy	black	-0.972269	1.23283e-07	-0.992455	1.90168e-10	-0.990449	6.16119e-10
ENSMUSG00000079293	56644	Clec7a	black	-0.962995	5.13526e-07	-0.98421	7.52932e-09	-0.991579	3.2886e-10
ENSMUSG00000066621	70381	Tecpr1	black	-0.982085	1.41032e-08	-0.992498	1.84783e-10	-0.993151	1.17375e-10
ENSMUSG00000030522	233315	Mtmr10	black	-0.968243	2.41177e-07	-0.98757	2.28856e-09	-0.990496	6.01031e-10
ENSMUSG00000015846	20181	Rxra	black	-0.975155	7.15151e-08	-0.985078	5.68349e-09	-0.991971	2.59326e-10
ENSMUSG00000021238	104776	Aldh6a1	black	-0.92433	1.71904e-05	-0.992139	2.33287e-10	-0.986535	3.40852e-09
ENSMUSG00000029456	71985	Acad10	black	-0.947989	2.74598e-06	-0.983312	9.91127e-09	-0.991251	3.97799e-10
ENSMUSG00000015149	64383	Sirt2	black	-0.942714	4.41134e-06	-0.991481	3.48348e-10	-0.991809	2.86445e-10
ENSMUSG00000049103	12772	Ccr2	black	-0.982572	1.22984e-08	-0.996471	4.28775e-12	-0.996706	3.038e-12
ENSMUSG00000034353	51801	Ramp1	black	-0.956685	1.11641e-06	-0.988756	1.38909e-09	-0.989394	1.03824e-09
ENSMUSG00000021003	14420	Galc	black	-0.981453	1.67539e-08	-0.997269	1.19017e-12	-0.99828	1.18132e-13
ENSMUSG00000036833	241274	Pnpla7	black	-0.986663	3.25037e-09	-0.995743	1.09285e-11	-0.996819	2.55088e-12
ENSMUSG00000029338	71914	Antxr2	black	-0.988883	1.31238e-09	-0.997555	6.85743e-13	-0.997606	6.16736e-13
ENSMUSG00000056749	18030	Nfil3	black	-0.970717	1.61439e-07	-0.98935	1.05969e-09	-0.987048	2.8086e-09
ENSMUSG00000050973	269952	Gdpgp1	blue	-0.811246	0.00136138	0.402708	0.194317	-0.495069	0.101744
ENSMUSG00000030088	107747	Aldh1l1	blue	0.849502	0.000469616	0.956137	1.18774e-06	-0.848009	0.000492079
ENSMUSG00000027080	381379	Med19	blue	-0.105331	0.744583	0.827245	0.000899682	-0.475653	0.118062
ENSMUSG00000023045	223920	Soat2	blue	0.504056	0.0947307	0.943185	4.23646e-06	-0.931033	1.09365e-05
ENSMUSG00000034639	74729	Setmar	blue	0.0383938	0.905701	0.733896	0.00658466	-0.470415	0.122742
ENSMUSG00000059842	228807	Zfp341	blue	-0.202154	0.528641	0.529919	0.076378	-0.271659	0.393028
ENSMUSG00000097571	70252	Jpx	blue	0.0676264	0.834586	0.434315	0.158306	-0.248848	0.435428
ENSMUSG00000046157	268567	Tmem229b	blue	-0.989185	1.1442e-09	0.942931	4.32993e-06	-0.961436	6.29528e-07
ENSMUSG00000025583	74370	Rptor	blue	0.874411	0.000198553	0.838609	0.000653281	-0.819708	0.00109892
ENSMUSG00000039105	66290	Atp6v1g1	blue	0.708143	0.00996113	0.951915	1.86704e-06	-0.510787	0.0896954
ENSMUSG00000027255	77038	Arfgap2	blue	0.157337	0.625302	0.943943	3.96626e-06	-0.537075	0.0717657
ENSMUSG00000081769	622459	Gm12216	blue	0.565661	0.0552475	0.943853	3.99751e-06	-0.858898	0.000345898
ENSMUSG00000020496	108660	Rnf187	blue	-0.579578	0.0482576	0.885317	0.000128494	-0.80524	0.00157511
ENSMUSG00000049969	71801	Plekhf2	blue	0.610776	0.0348911	0.980644	2.07117e-08	-0.839095	0.000644058
ENSMUSG00000060708	117197	Bloc1s4	blue	0.569141	0.0534374	0.795213	0.00198831	-0.579129	0.0484731
ENSMUSG00000071256	449521	Zfp213	blue	0.146476	0.649646	0.648025	0.0226753	-0.338117	0.282395
ENSMUSG00000079559	100502940	Colca2	blue	-0.505763	0.0934357	0.711254	0.00949644	-0.531435	0.075384
ENSMUSG00000006930	15114	Hap1	blue	0.637699	0.0256873	0.972345	1.21623e-07	-0.817419	0.0011657
ENSMUSG00000035048	69010	Anapc13	blue	-0.0061522	0.984861	0.486358	0.108867	-0.223014	0.485981
ENSMUSG00000026922	67512	Agpat2	blue	-0.807385	0.00149604	0.872602	0.000212593	-0.916994	2.69618e-05
ENSMUSG00000029551	66506	Psmg3	blue	-0.554264	0.0614756	0.83844	0.000656523	-0.548506	0.0648002
ENSMUSG00000027466	24105	Rbck1	blue	0.259414	0.41552	0.888243	0.000113492	-0.739708	0.00595995
ENSMUSG00000010755	27267	Cars	blue	-0.656379	0.0204332	0.986794	3.09436e-09	-0.991162	4.1834e-10
ENSMUSG00000024491	225432	Rbm27	blue	-0.128328	0.691026	0.637906	0.025624	-0.36387	0.24494
ENSMUSG00000038848	228994	Ythdf1	blue	-0.597473	0.0402162	0.960647	6.95747e-07	-0.85413	0.000405016
ENSMUSG00000038268	246257	Ovca2	blue	-0.0374904	0.907911	0.742505	0.00567584	-0.209785	0.512851
ENSMUSG00000002325	16391	Irf9	blue	-0.749433	0.00501588	0.980806	1.98663e-08	-0.938878	6.05983e-06
ENSMUSG00000041115	245666	Iqsec2	blue	-0.975383	6.83212e-08	0.983585	9.13011e-09	-0.819545	0.00110358
ENSMUSG00000072974	214321	Gm4787	blue	-0.488748	0.106881	0.393423	0.205777	-0.247399	0.438195
ENSMUSG00000036712	74256	Cyld	blue	-0.772862	0.00320485	0.767539	0.00356365	-0.939061	5.97182e-06
ENSMUSG00000029504	69663	Ddx51	blue	-0.0712536	0.825831	0.772206	0.00324752	-0.407533	0.18852
ENSMUSG00000027680	14359	Fxr1	blue	-0.589798	0.0435384	0.641388	0.0245798	-0.440018	0.152298
ENSMUSG00000041143	77056	Tmco4	blue	-0.211605	0.509116	0.975837	6.22939e-08	-0.690811	0.012866
ENSMUSG00000002396	77090	Ocel1	blue	0.505982	0.093271	0.828006	0.000881215	-0.241155	0.450209
ENSMUSG00000034154	68142	Ino80	blue	-0.0044616	0.989021	0.914635	3.08918e-05	-0.533962	0.0737478
ENSMUSG00000026820	96979	Ptges2	blue	0.60737	0.0362031	0.937006	7.02428e-06	-0.312016	0.323483
ENSMUSG00000023952	56055	Gtpbp2	blue	0.40256	0.194496	0.970256	1.74416e-07	-0.865121	0.000279097
ENSMUSG00000029084	12494	Cd38	blue	-0.357017	0.254604	0.830569	0.000821242	-0.447899	0.144237
ENSMUSG00000027808	28146	Serp1	blue	-0.950266	2.20378e-06	0.949538	2.36706e-06	-0.927528	1.39287e-05
ENSMUSG00000018076	76199	Med13l	blue	-0.754969	0.00453163	0.900279	6.55559e-05	-0.773884	0.00313926
ENSMUSG00000085492	68789	Trmt61b	blue	-0.179657	0.576359	0.879591	0.000162306	-0.528045	0.0776182
ENSMUSG00000020694	24086	Tlk2	blue	0.453469	0.13871	0.954258	1.46019e-06	-0.839821	0.000630475
ENSMUSG00000010609	19165	Psen2	blue	0.837334	0.000677963	0.984376	7.1432e-09	-0.838183	0.000661462
ENSMUSG00000067212	15040	H2-T23	blue	-0.910573	3.8703e-05	0.965581	3.59078e-07	-0.946379	3.18933e-06
ENSMUSG00000002015	27061	Bcap31	blue	0.433282	0.15941	0.866632	0.000264511	-0.571797	0.0520839
ENSMUSG00000024382	13872	Ercc3	blue	-0.566236	0.0549456	0.39214	0.207392	-0.479814	0.11443
ENSMUSG00000029009	17769	Mthfr	blue	-0.94109	5.05924e-06	0.924264	1.72644e-05	-0.978411	3.56259e-08
ENSMUSG00000063236	117171	1110038F14Rik	blue	-0.619055	0.0318434	0.846369	0.000517695	-0.599761	0.0392617
ENSMUSG00000022191	14000	Drosha	blue	0.274649	0.387633	0.716464	0.00875478	-0.656896	0.0203
ENSMUSG00000004285	66144	Atp6v1f	blue	0.933356	9.25121e-06	0.987403	2.44563e-09	-0.781585	0.00267706
ENSMUSG00000037519	233977	Ppfia1	blue	0.229463	0.473119	0.964675	4.08223e-07	-0.738427	0.0060937
ENSMUSG00000079419	73656	Ms4a6c	blue	-0.166058	0.605999	0.935918	7.63769e-06	-0.975794	6.28397e-08
ENSMUSG00000026956	227620	Uap1l1	blue	0.834698	0.000731277	0.988533	1.53189e-09	-0.965021	3.88862e-07
ENSMUSG00000054676	72244	1600014C10Rik	blue	0.66771	0.0176567	0.778329	0.00286564	-0.624745	0.029863
ENSMUSG00000059852	240444	Kcng2	blue	-0.381003	0.221737	0.224968	0.482066	-0.224109	0.483786
ENSMUSG00000037434	22782	Slc30a1	blue	0.758669	0.0042282	0.991424	3.60057e-10	-0.811218	0.00136233
ENSMUSG00000038539	107503	Atf5	blue	-0.895644	8.16132e-05	0.925724	1.57023e-05	-0.82131	0.00105397
ENSMUSG00000021263	70059	Degs2	blue	0.306727	0.332188	0.839987	0.000627396	-0.300663	0.342321
ENSMUSG00000097891	100042074	Gm3650	blue	-0.891025	0.000100539	0.573222	0.0513679	-0.788713	0.00229735
ENSMUSG00000015943	69168	Bola1	blue	-0.963833	4.58601e-07	0.898169	7.25227e-05	-0.743395	0.0055876
ENSMUSG00000022450	67130	Ndufa6	blue	-0.70478	0.0104821	0.79044	0.0022119	-0.488003	0.107498
ENSMUSG00000032333	69106	Stoml1	blue	0.876966	0.000179963	0.969811	1.87733e-07	-0.98782	2.06883e-09
ENSMUSG00000024960	18797	Plcb3	blue	-0.853938	0.000407541	0.849477	0.000469982	-0.895378	8.26216e-05
ENSMUSG00000062270	21761	Morf4l1	blue	0.285942	0.3676	0.791764	0.00214803	-0.199574	0.534027
ENSMUSG00000024797	68505	Vps51	blue	-0.171402	0.594282	0.392355	0.207121	-0.137821	0.669275
ENSMUSG00000070031	434484	Sp140	blue	-0.811669	0.00134723	0.886754	0.000120944	-0.91011	3.96835e-05
ENSMUSG00000073409	110557	H2-Q6	blue	0.878639	0.000168546	0.992772	1.5351e-10	-0.965841	3.45834e-07
ENSMUSG00000025485	101489	Ric8a	blue	-0.0523736	0.871582	0.842039	0.000590336	-0.700246	0.0112165
ENSMUSG00000073402	667977	Gm8909	blue	0.690745	0.012878	0.986638	3.28012e-09	-0.936245	7.44941e-06
ENSMUSG00000024906	71711	Mus81	blue	-0.379034	0.224333	0.724997	0.00763472	-0.557063	0.0599031
ENSMUSG00000056204	66522	Pgpep1	blue	-0.53613	0.0723633	0.862092	0.000310223	-0.638098	0.0255656
ENSMUSG00000036908	54445	Unc93b1	blue	-0.882249	0.00014584	0.983892	8.314e-09	-0.987203	2.64523e-09
ENSMUSG00000024238	21417	Zeb1	blue	0.112195	0.728477	0.743107	0.005616	-0.781191	0.00269938
ENSMUSG00000030216	60321	Wbp11	blue	0.148394	0.645323	0.914914	3.04048e-05	-0.478332	0.115715
ENSMUSG00000049232	68140	Tigd2	blue	-0.552708	0.0623622	0.578053	0.0489912	-0.410386	0.185143
ENSMUSG00000003923	21780	Tfam	blue	-0.15061	0.640342	0.776392	0.00298254	-0.809944	0.00140572
ENSMUSG00000024290	19877	Rock1	blue	-0.867172	0.000259448	0.739803	0.00595018	-0.649372	0.0223021
ENSMUSG00000033885	218699	Pxk	blue	0.204282	0.524218	0.963935	4.52294e-07	-0.679497	0.015073
ENSMUSG00000066149	66440	Cdc26	blue	-0.444191	0.147995	0.707287	0.0100919	-0.370515	0.235776
ENSMUSG00000044231	105193	Nhlrc1	blue	-0.973764	9.36727e-08	0.778566	0.00285162	-0.845247	0.000535808
ENSMUSG00000020682	118453	Mmp28	blue	-0.490005	0.105846	0.716707	0.00872137	-0.782984	0.00259903
ENSMUSG00000035278	78670	Plekhj1	blue	0.602632	0.0380867	0.949374	2.40491e-06	-0.584192	0.0460844
ENSMUSG00000061665	12488	Cd2ap	blue	-0.908054	4.42767e-05	0.970976	1.54505e-07	-0.889441	0.000107763
ENSMUSG00000054226	69786	Tprkb	blue	-0.680273	0.0149134	0.948843	2.53155e-06	-0.612254	0.0343321
ENSMUSG00000035849	268481	Krt222	blue	-0.189835	0.554559	0.621604	0.0309449	-0.390577	0.20937
ENSMUSG00000043257	230801	Pigv	blue	-0.951336	1.98034e-06	0.915203	2.9907e-05	-0.868171	0.000250277
ENSMUSG00000060550	15018	H2-Q7	blue	0.858467	0.000350949	0.979434	2.79945e-08	-0.961673	6.10724e-07
ENSMUSG00000064194	668620	Zfp936	blue	-0.548733	0.0646674	0.375135	0.229528	-0.454535	0.137669
ENSMUSG00000073758	66938	Sh3d21	blue	0.00294729	0.992747	0.771229	0.00331183	-0.542662	0.0682998
ENSMUSG00000004947	74198	Dtx2	blue	-0.548984	0.0645201	0.949422	2.39387e-06	-0.904074	5.43505e-05
ENSMUSG00000030157	93694	Clec2d	blue	0.746862	0.00525365	0.878828	0.000167295	-0.960526	7.06353e-07
ENSMUSG00000033781	142688	Asb13	blue	-0.606983	0.0363545	0.930853	1.10765e-05	-0.903646	5.55317e-05
ENSMUSG00000031109	209224	Enox2	blue	-0.893418	9.03475e-05	0.967418	2.73772e-07	-0.843369	0.000567229
ENSMUSG00000047786	66643	Lix1	blue	-0.716373	0.00876737	0.352228	0.261489	-0.577371	0.0493221
ENSMUSG00000001211	28169	Agpat3	blue	0.172981	0.590838	0.98868	1.4367e-09	-0.916913	2.70897e-05
ENSMUSG00000028249	53378	Sdcbp	blue	0.111082	0.731081	0.884704	0.000131824	-0.617354	0.0324534
ENSMUSG00000024780	67072	Cdc37l1	blue	-0.655452	0.0206737	0.596439	0.0406527	-0.410742	0.184725
ENSMUSG00000042350	68497	Arel1	blue	-0.759606	0.00415395	0.966164	3.29979e-07	-0.974429	8.24852e-08
ENSMUSG00000024862	16594	Klc2	blue	0.0261424	0.935724	0.635686	0.0263064	-0.287184	0.36543
ENSMUSG00000051147	17961	Nat2	blue	0.161785	0.615428	0.759369	0.00417258	-0.600703	0.0388732
ENSMUSG00000039497	212898	Dse	blue	-0.882844	0.000142339	0.836726	0.00068999	-0.662497	0.0188974
ENSMUSG00000022801	70144	Lrch3	blue	-0.96732	2.77878e-07	0.884802	0.000131287	-0.92394	1.76261e-05
ENSMUSG00000031712	16168	Il15	blue	-0.978407	3.5653e-08	0.829226	0.000852249	-0.949222	2.44062e-06
ENSMUSG00000025480	74075	Syce1	blue	0.320766	0.309362	0.77044	0.00336449	-0.308732	0.328872
ENSMUSG00000039450	67880	Dcxr	blue	-0.87279	0.000211099	0.949757	2.31697e-06	-0.965084	3.85421e-07
ENSMUSG00000025410	69654	Dctn2	blue	-0.0922028	0.775647	0.746042	0.00533124	-0.300096	0.343277
ENSMUSG00000031723	234723	Txnl4b	blue	-0.61695	0.0325993	0.846196	0.000520451	-0.452817	0.13935
ENSMUSG00000031849	12845	Comp	blue	0.0669147	0.836306	0.895815	8.09733e-05	-0.605118	0.0370901
ENSMUSG00000039048	235169	Foxred1	blue	-0.130384	0.686297	0.953082	1.65447e-06	-0.609314	0.03545
ENSMUSG00000030592	20190	Ryr1	blue	0.37783	0.22593	0.906829	4.72045e-05	-0.290607	0.359486
ENSMUSG00000034258	217721	Flvcr2	blue	-0.138572	0.667564	0.633488	0.0269949	-0.220384	0.491271
ENSMUSG00000020387	76901	Jade2	blue	-0.976332	5.62192e-08	0.958834	8.68795e-07	-0.867648	0.000255047
ENSMUSG00000032715	228775	Trib3	blue	0.977393	4.47751e-08	0.979419	2.80965e-08	-0.944787	3.68186e-06
ENSMUSG00000068606	225594	Gm4841	blue	-0.958938	8.5802e-07	0.725155	0.00761508	-0.954027	1.49696e-06
ENSMUSG00000097842	320950	9330104G04Rik	blue	-0.249075	0.434997	0.770721	0.0033457	-0.32136	0.308416
ENSMUSG00000090101	73474	Snhg9	blue	0.460663	0.131776	0.8106	0.00138324	-0.292472	0.356269
ENSMUSG00000029470	18438	P2rx4	blue	-0.992357	2.02734e-10	0.985944	4.22009e-09	-0.994794	2.98456e-11
ENSMUSG00000020459	76784	Mtif2	blue	-0.735491	0.00640855	0.740091	0.00592046	-0.516216	0.0857679
ENSMUSG00000057143	319236	Trim12c	blue	-0.92389	1.76828e-05	0.89359	8.96466e-05	-0.847998	0.000492237
ENSMUSG00000068114	76457	Ccdc134	blue	0.831484	0.000800606	0.880926	0.000153862	-0.173647	0.589387
ENSMUSG00000032091	214523	Tmprss4	blue	0.346889	0.269291	0.728593	0.00719635	-0.290613	0.359476
ENSMUSG00000074466	545539	Gm15417	blue	-0.769274	0.00344351	0.452924	0.139245	-0.454956	0.137258
ENSMUSG00000099974	12047	Bcl2a1d	blue	0.977996	3.91538e-08	0.942286	4.57516e-06	-0.826385	0.000920865
ENSMUSG00000029071	13542	Dvl1	blue	-0.487948	0.107543	0.75391	0.00462134	-0.449486	0.142649
ENSMUSG00000026659	80915	Dusp12	blue	0.211753	0.508813	0.605182	0.0370647	-0.397274	0.200975
ENSMUSG00000029640	22217	Usp12	blue	-0.676576	0.0156856	0.968219	2.42069e-07	-0.90262	5.84498e-05
ENSMUSG00000028893	230784	Sesn2	blue	-0.561279	0.0575873	0.908244	4.38354e-05	-0.907484	4.56202e-05
ENSMUSG00000039456	338467	Morc3	blue	-0.89291	9.24417e-05	0.96574	3.50943e-07	-0.856928	0.000369451
ENSMUSG00000028145	75778	Them4	blue	0.546542	0.0659626	0.951308	1.98586e-06	-0.259905	0.414607
ENSMUSG00000020928	75689	Higd1b	blue	0.713191	0.00921554	0.583216	0.0465386	-0.447214	0.144928
ENSMUSG00000056121	225020	Fez2	blue	-0.985877	4.32112e-09	0.886727	0.000121084	-0.972737	1.13319e-07
ENSMUSG00000082229	17954	Nap1l2	blue	0.0995764	0.75816	0.663419	0.0186734	-0.245449	0.44193
ENSMUSG00000085912	100504267	Trp53cor1	blue	-0.833871	0.000748646	0.829226	0.000852264	-0.655679	0.0206147
ENSMUSG00000007867	76411	Ift43	blue	0.781037	0.00270815	0.930347	1.14778e-05	-0.357929	0.253305
ENSMUSG00000075227	29805	Znhit2	blue	0.579588	0.0482529	0.897157	7.60668e-05	-0.190407	0.553345
ENSMUSG00000069631	72149	Strada	blue	-0.583986	0.0461802	0.889312	0.00010837	-0.655629	0.0206276
ENSMUSG00000036810	382030	Cnep1r1	blue	0.260908	0.412743	0.810861	0.00137439	-0.399395	0.19836
ENSMUSG00000042641	240816	Rgsl1	blue	-0.093804	0.771841	0.796921	0.00191262	-0.315334	0.318087
ENSMUSG00000040552	12267	C3ar1	blue	-0.910778	3.82738e-05	0.989333	1.0686e-09	-0.96331	4.92287e-07
ENSMUSG00000058163	432555	Gm5431	blue	-0.961597	6.16714e-07	0.94835	2.65376e-06	-0.929207	1.24242e-05
ENSMUSG00000025873	76577	Faf2	blue	0.322843	0.306061	0.881969	0.000147513	-0.209219	0.514016
ENSMUSG00000057895	22646	Zfp105	blue	-0.357829	0.253447	0.373377	0.231894	-0.402992	0.193973
ENSMUSG00000042772	226517	Smg7	blue	-0.415434	0.179262	0.973939	9.06303e-08	-0.787068	0.00238109
ENSMUSG00000039531	72580	Zup1	blue	-0.620997	0.0311573	0.968461	2.33106e-07	-0.914357	3.13831e-05
ENSMUSG00000071519	22073	Prss3	blue	-0.447214	0.144928	0.357917	0.253323	-0.447214	0.144928
ENSMUSG00000087543	100504191	Gm16576	blue	-0.279771	0.378478	0.484531	0.110402	-0.394313	0.204661
ENSMUSG00000075602	110454	Ly6a	blue	-0.398857	0.199021	0.448558	0.143576	-0.461127	0.131337
ENSMUSG00000078486	74183	Perm1	blue	0.31502	0.318597	0.811421	0.00135553	-0.45984	0.132558
ENSMUSG00000019359	71584	Gdpd2	blue	-0.651396	0.02175	0.687776	0.0134329	-0.713722	0.00913962
ENSMUSG00000015850	229595	Adamtsl4	blue	-0.850129	0.000460416	0.685639	0.0138429	-0.474089	0.119448
ENSMUSG00000030556	67867	Lrrc28	blue	-0.659415	0.0196602	0.246697	0.439536	-0.400502	0.197003
ENSMUSG00000004846	26433	Plod3	blue	-0.726486	0.0074508	0.956019	1.2036e-06	-0.919065	2.38461e-05
ENSMUSG00000029446	100678	Psph	blue	0.255143	0.423513	0.877482	0.000176378	-0.295903	0.350389
ENSMUSG00000030275	75320	Etnk1	blue	-0.981099	1.84044e-08	0.932633	9.75218e-06	-0.987512	2.34257e-09
ENSMUSG00000030122	69202	Ptms	blue	0.790427	0.00221253	0.947286	2.93308e-06	-0.709984	0.00968417
ENSMUSG00000055912	232086	Tmem150a	blue	0.736995	0.00624579	0.97008	1.79578e-07	-0.836682	0.000690858
ENSMUSG00000029032	230972	Arhgef16	blue	0.454745	0.137464	0.641622	0.0245108	-0.593598	0.0418702
ENSMUSG00000026858	108958	Miga2	blue	-0.491764	0.104409	0.759416	0.00416887	-0.352472	0.261135
ENSMUSG00000033174	23945	Mgll	blue	-0.972208	1.24633e-07	0.971689	1.36593e-07	-0.734686	0.00649699
ENSMUSG00000090145	394435	Ugt1a6b	blue	0.729666	0.00706928	0.860349	0.000329317	-0.167813	0.602142
ENSMUSG00000030979	22276	Uros	blue	-0.48758	0.107848	0.641582	0.0245224	-0.304976	0.335097
ENSMUSG00000019818	53599	Cd164	blue	-0.775441	0.00304125	0.793632	0.00206033	-0.528677	0.0771987
ENSMUSG00000031549	209176	Ido2	blue	0.0943691	0.770499	0.866036	0.000270195	-0.773554	0.00316028
ENSMUSG00000016344	66496	Ppdpf	blue	-0.15358	0.633685	0.848836	0.000479532	-0.596082	0.0408045
ENSMUSG00000040328	18356	Olfr56	blue	-0.882806	0.00014256	0.922249	1.9618e-05	-0.78534	0.00247151
ENSMUSG00000014075	66061	Tctex1d2	blue	0.743928	0.00553527	0.977466	4.40634e-08	-0.906258	4.86207e-05
ENSMUSG00000060843	216033	Ctnna3	blue	0.0199439	0.950945	0.588747	0.0440078	-0.447214	0.144928
ENSMUSG00000025408	13198	Ddit3	blue	-0.912913	3.40342e-05	0.960535	7.05519e-07	-0.981826	1.51457e-08
ENSMUSG00000039841	627049	Zfp800	blue	0.64955	0.0222532	0.976091	5.91153e-08	-0.740773	0.00585054
ENSMUSG00000049191	331474	Rtl5	blue	0.255737	0.422398	0.788475	0.00230935	-0.219786	0.492478
ENSMUSG00000020177	77397	9530003J23Rik	blue	-0.447214	0.144928	0.346904	0.269268	-0.447214	0.144928
ENSMUSG00000024457	22670	Trim26	blue	-0.907977	4.44564e-05	0.932269	1.00122e-05	-0.916189	2.8256e-05
ENSMUSG00000035234	70681	Abraxas1	blue	-0.11071	0.731953	0.704623	0.010507	-0.66647	0.0179462
ENSMUSG00000068580	72008	Zfyve19	blue	-0.68248	0.014466	0.491626	0.104522	-0.306118	0.333197
ENSMUSG00000024019	74157	Cmtr1	blue	-0.611267	0.0347047	0.427508	0.165672	-0.781687	0.00267135
ENSMUSG00000047098	268749	Rnf31	blue	-0.611555	0.0345956	0.934327	8.61071e-06	-0.764879	0.00375391
ENSMUSG00000041936	11603	Agrn	blue	-0.578165	0.048937	0.945666	3.40311e-06	-0.891552	9.82194e-05
ENSMUSG00000002661	66400	Alkbh7	blue	0.0353241	0.913214	0.95513	1.32819e-06	-0.585525	0.0454697
ENSMUSG00000060716	211945	Plekhh1	blue	-0.592076	0.0425328	0.412928	0.182167	-0.636324	0.0261092
ENSMUSG00000037731	230787	Themis2	blue	-0.987674	2.19478e-09	0.906529	4.79455e-05	-0.959817	7.71181e-07
ENSMUSG00000026848	30934	Tor1b	blue	0.608493	0.0357669	0.930533	1.1329e-05	-0.199647	0.533874
ENSMUSG00000020023	319880	Tmcc3	blue	-0.800252	0.00177146	0.942535	4.47946e-06	-0.956549	1.13386e-06
ENSMUSG00000051502	70240	Ufsp1	blue	0.684333	0.0140981	0.966999	2.91659e-07	-0.350835	0.263512
ENSMUSG00000078495	100041677	Zfp984	blue	-0.366214	0.241684	0.96561	3.57563e-07	-0.627069	0.0290803
ENSMUSG00000035585	66078	Tsen34	blue	-0.870843	0.000226977	0.906387	4.82989e-05	-0.839419	0.000637984
ENSMUSG00000066258	76681	Trim12a	blue	-0.966868	2.97421e-07	0.855773	0.00038382	-0.959101	8.41377e-07
ENSMUSG00000036873	66421	2410004B18Rik	blue	0.258571	0.417092	0.836757	0.000689375	-0.739256	0.00600689
ENSMUSG00000029298	236573	Gbp9	blue	-0.908365	4.35558e-05	0.929287	1.2356e-05	-0.96486	3.97767e-07
ENSMUSG00000079492	100529082	Gm11127	blue	0.185193	0.56446	0.972411	1.20178e-07	-0.805598	0.00156172
ENSMUSG00000049323	237782	Smcr8	blue	0.293722	0.35412	0.891172	9.98865e-05	-0.589376	0.0437263
ENSMUSG00000028496	70122	Mllt3	blue	-0.495396	0.101483	0.42211	0.171664	-0.316033	0.316958
ENSMUSG00000026466	208263	Tor1aip1	blue	-0.63091	0.0278192	0.964524	4.16963e-07	-0.925974	1.54464e-05
ENSMUSG00000090942	240328	F830016B08Rik	blue	-0.778833	0.0028358	0.928272	1.32451e-05	-0.751537	0.00482748
ENSMUSG00000050114	320769	Prdx6b	blue	-0.0397946	0.902275	0.346904	0.269268	-7.61427e-05	0.999813
ENSMUSG00000029502	269682	Golga3	blue	-0.946856	3.05263e-06	0.834166	0.000742425	-0.969958	1.8323e-07
ENSMUSG00000074151	434341	Nlrc5	blue	-0.519371	0.0835402	0.929202	1.2428e-05	-0.77234	0.00323873
ENSMUSG00000070697	65961	Utp3	blue	-0.364106	0.24461	0.911322	3.71568e-05	-0.388172	0.212436
ENSMUSG00000003410	15571	Elavl3	blue	-0.775419	0.00304262	0.632263	0.0273842	-0.651626	0.021688
ENSMUSG00000050896	269295	Rtn4rl2	blue	-0.222574	0.486864	0.431765	0.16104	-0.485297	0.109757
ENSMUSG00000029291	52822	Rufy3	blue	-0.909387	4.12532e-05	0.957427	1.02533e-06	-0.977767	4.12195e-08
ENSMUSG00000025602	80902	Zfp202	blue	-0.286585	0.366475	0.718689	0.00845164	-0.749683	0.00499324
ENSMUSG00000025386	18588	Pde6g	blue	-0.473864	0.119648	0.264602	0.405914	-0.393486	0.205698
ENSMUSG00000080712	382522	Hist3h2bb-ps	blue	-0.721819	0.0080386	0.708206	0.00995155	-0.354946	0.257569
ENSMUSG00000094874	102633783	LOC102633783	blue	-0.118927	0.712777	0.947849	2.78264e-06	-0.545511	0.066578
ENSMUSG00000006311	14008	Etv2	blue	0.447214	0.144928	0.706784	0.0101693	NA	NA
ENSMUSG00000053101	353346	Gpr141	blue	-0.666895	0.0178466	0.861195	0.000319938	-0.801997	0.00170075
ENSMUSG00000001750	27060	Tcirg1	blue	0.438522	0.15386	0.994073	5.70297e-11	-0.775295	0.00305036
ENSMUSG00000020010	26464	Vnn3	blue	-0.942546	4.47515e-06	0.966076	3.34264e-07	-0.887586	0.000116735
ENSMUSG00000030374	97387	Strn4	blue	-0.192663	0.548565	0.851649	0.000438717	-0.686199	0.0137347
ENSMUSG00000087175	622070	Gm15133	blue	0.192815	0.548242	0.848649	0.000482344	-0.518324	0.0842752
ENSMUSG00000021704	382793	Mtx3	blue	-0.135115	0.675451	0.608992	0.035574	-0.183613	0.567845
ENSMUSG00000001829	20480	Clpb	blue	-0.393746	0.205371	0.753148	0.0046868	-0.347747	0.268027
ENSMUSG00000024210	271424	Ip6k3	blue	-0.00751493	0.981508	0.885636	0.000126785	-0.794941	0.00200053
ENSMUSG00000026988	72137	Wdsub1	blue	-0.613274	0.0339503	0.744198	0.00550884	-0.705842	0.0103155
ENSMUSG00000029605	23961	Oas1b	blue	-0.833672	0.000752892	0.911069	3.76743e-05	-0.786582	0.00240624
ENSMUSG00000045410	56043	Akr1e1	blue	-0.50002	0.0978394	0.967093	2.87571e-07	-0.94551	3.45112e-06
ENSMUSG00000052749	244183	Trim30b	blue	-0.739926	0.00593744	0.850279	0.000458238	-0.744177	0.00551091
ENSMUSG00000057219	276905	Armc7	blue	-0.0525136	0.871241	0.9918	2.87942e-10	-0.951673	1.91386e-06
ENSMUSG00000031458	66423	Coprs	blue	-0.588926	0.0439279	0.676051	0.0157975	-0.593985	0.041703
ENSMUSG00000047067	67446	Dusp28	blue	-0.587366	0.0446306	0.758369	0.00425225	-0.683474	0.0142677
ENSMUSG00000009076	67178	Zmat5	blue	-0.950749	2.10053e-06	0.562605	0.0568725	-0.561611	0.0574078
ENSMUSG00000034438	76074	Gbp8	blue	-0.923917	1.76521e-05	0.865966	0.00027087	-0.915995	2.85741e-05
ENSMUSG00000031154	54644	Otud5	blue	-0.114886	0.722188	0.982515	1.24997e-08	-0.811415	0.00135572
ENSMUSG00000031012	12361	Cask	blue	-0.190406	0.553347	0.891257	9.95139e-05	-0.729436	0.00709641
ENSMUSG00000036887	12259	C1qa	blue	-0.886607	0.000121697	0.919758	2.28704e-05	-0.909464	4.10848e-05
ENSMUSG00000072761	100862203	Gm6712	blue	-0.316041	0.316944	0.842216	0.000587214	-0.85853	0.000350204
ENSMUSG00000090215	434218	Trim34b	blue	-0.581604	0.0472946	0.943175	4.24009e-06	-0.730702	0.00694817
ENSMUSG00000027639	56045	Samhd1	blue	-0.865693	0.000273502	0.928586	1.29647e-05	-0.960561	7.03281e-07
ENSMUSG00000040818	211922	Dennd6a	blue	-0.969287	2.04406e-07	0.92696	1.44694e-05	-0.838337	0.000658502
ENSMUSG00000072572	214922	Slc39a2	blue	0.555688	0.0606719	0.847192	0.000504715	-0.123432	0.702328
ENSMUSG00000056144	94094	Trim34a	blue	-0.779158	0.00281672	0.949268	2.42977e-06	-0.764538	0.00377888
ENSMUSG00000028015	229445	Ctso	blue	-0.0369736	0.909176	0.830821	0.000815519	-0.614746	0.0334047
ENSMUSG00000091803	66272	Cox16	blue	-0.154485	0.631663	0.261878	0.410945	-0.281429	0.375539
ENSMUSG00000042453	19699	Reln	blue	0.460287	0.132133	0.649346	0.0223093	0.0273097	0.932859
ENSMUSG00000049882	207965	Vcpkmt	blue	-0.33167	0.292253	0.914139	3.1773e-05	-0.380568	0.222309
ENSMUSG00000029196	231151	Tada2b	blue	-0.96078	6.84229e-07	0.953094	1.65248e-06	-0.799668	0.0017956
ENSMUSG00000044763	52575	Trmt10c	blue	-0.333398	0.289593	0.759756	0.0041421	-0.215275	0.501622
ENSMUSG00000088752	100316840	Mir1934	blue	-0.522207	0.0815714	0.235039	0.462126	-0.500169	0.0977233
ENSMUSG00000029433	66593	Diablo	blue	0.447768	0.14437	0.935489	7.8909e-06	-0.69546	0.0120321
ENSMUSG00000024327	14977	Slc39a7	blue	0.141267	0.661436	0.94002	5.52525e-06	-0.287876	0.364224
ENSMUSG00000062300	19294	Nectin2	blue	0.455331	0.136893	0.986384	3.60244e-09	-0.506671	0.092752
ENSMUSG00000020817	54189	Rabep1	blue	0.744491	0.00548036	0.961344	6.37015e-07	-0.206699	0.519212
ENSMUSG00000073481	67247	2020-03-02	blue	-0.545267	0.0667244	0.966628	3.08208e-07	-0.275726	0.3857
ENSMUSG00000092178	72716	2810047C21Rik1	blue	-0.791201	0.00217501	0.578094	0.0489715	-0.8069	0.00151364
ENSMUSG00000000078	23849	Klf6	blue	-0.961763	6.03638e-07	0.977069	4.80469e-08	-0.871692	0.000219944
ENSMUSG00000031257	237038	Nox1	blue	0.254485	0.424751	0.509488	0.0906523	-0.865963	0.000270898
ENSMUSG00000060509	23832	Xcr1	blue	-0.651089	0.0218332	0.782636	0.00261827	-0.384595	0.217046
ENSMUSG00000089844	381287	A530032D15Rik	blue	-0.61029	0.0350762	0.584169	0.0460952	-0.644389	0.0237048
ENSMUSG00000025877	212032	Hk3	blue	0.586888	0.0448474	0.995013	2.40823e-11	-0.969597	1.944e-07
ENSMUSG00000049939	192198	Lrrc4	blue	0.424173	0.169358	0.890242	0.000104059	-0.330553	0.29398
ENSMUSG00000022550	268822	Adck5	blue	0.243828	0.445046	0.855302	0.00038981	-0.65708	0.0202529
ENSMUSG00000096887	100463512	Gm20594	blue	-0.021561	0.946973	0.40598	0.190374	-0.351581	0.262427
ENSMUSG00000074746	107368	Pdzd8	blue	-0.166907	0.604131	0.60317	0.0378694	-0.615833	0.0330057
ENSMUSG00000030683	233878	Sez6l2	blue	-0.457161	0.135123	0.194383	0.54493	-0.391071	0.208744
ENSMUSG00000073489	15951	Ifi204	blue	-0.651616	0.0216906	0.951835	1.88246e-06	-0.849572	0.000468578
ENSMUSG00000004952	54153	Rasa4	blue	0.553975	0.0616397	0.982946	1.10404e-08	-0.755234	0.00450932
ENSMUSG00000027322	20612	Siglec1	blue	-0.289646	0.361149	0.721904	0.00802751	-0.287373	0.365101
ENSMUSG00000032712	67246	Resf1	blue	0.466559	0.126265	0.873865	0.000202709	-0.827605	0.000890918
ENSMUSG00000026650	104362	Meig1	blue	-0.0457392	0.887752	0.818877	0.00112282	-0.660854	0.0193013
ENSMUSG00000047495	244310	Dlgap2	blue	0.0114954	0.971715	0.595662	0.0409834	-0.0413794	0.8984
ENSMUSG00000049502	209200	Dtx3l	blue	-0.946582	3.13066e-06	0.966649	3.07257e-07	-0.936617	7.23875e-06
ENSMUSG00000032596	74153	Uba7	blue	-0.790952	0.00218704	0.957532	1.01295e-06	-0.913225	3.34467e-05
ENSMUSG00000028184	99633	Adgrl2	blue	-0.973469	9.90111e-08	0.957621	1.00253e-06	-0.905924	4.94647e-05
ENSMUSG00000020707	71956	Rnf135	blue	-0.473204	0.120236	0.968022	2.49585e-07	-0.762016	0.00396729
ENSMUSG00000026532	20739	Spta1	blue	-0.222376	0.487261	0.599572	0.0393398	-0.227616	0.476785
ENSMUSG00000027951	56417	Adar	blue	-0.747139	0.00522763	0.949209	2.44387e-06	-0.775855	0.0030156
ENSMUSG00000021758	13206	Ddx4	blue	0.204731	0.523286	0.89547	8.22734e-05	-0.164665	0.609066
ENSMUSG00000042642	319945	Flad1	blue	-0.203841	0.525133	0.774173	0.00312089	-0.213025	0.506211
ENSMUSG00000040040	21821	Ift88	blue	-0.0396035	0.902742	0.739088	0.00602447	-0.299605	0.344106
ENSMUSG00000024339	21355	Tap2	blue	-0.532922	0.0744184	0.959687	7.83513e-07	-0.882313	0.000145461
ENSMUSG00000052516	268902	Robo2	blue	-0.606877	0.0363961	0.299308	0.344607	-0.0359083	0.911784
ENSMUSG00000040428	69217	Plekha4	blue	-0.753713	0.00463826	0.786917	0.00238886	-0.554673	0.0612444
ENSMUSG00000050565	240832	Tor1aip2	blue	-0.430162	0.162775	0.959926	7.6091e-07	-0.754935	0.00453446
ENSMUSG00000032386	56404	Trip4	blue	-0.397868	0.200241	0.782297	0.00263713	-0.278701	0.380382
ENSMUSG00000036534	234595	Slc38a7	blue	0.720614	0.0081958	0.980603	2.09329e-08	-0.488525	0.107065
ENSMUSG00000056529	19204	Ptafr	blue	0.989639	9.24271e-10	0.997336	1.05209e-12	-0.378482	0.225065
ENSMUSG00000033066	14457	Gas7	blue	-0.867234	0.000258873	0.948279	2.67172e-06	-0.768121	0.00352296
ENSMUSG00000037447	214855	Arid5a	blue	-0.923148	1.8538e-05	0.837984	0.000665293	-0.982973	1.09534e-08
ENSMUSG00000004328	53417	Hif3a	blue	-0.650439	0.0220099	0.326715	0.299961	-0.650439	0.0220099
ENSMUSG00000019487	106628	Trip10	blue	0.374599	0.230248	0.960284	7.27989e-07	-0.719712	0.00831495
ENSMUSG00000030154	232408	Klrb1f	blue	-0.4054	0.191069	0.428476	0.164612	-0.623408	0.0303202
ENSMUSG00000049401	72075	Ogfr	blue	-0.639758	0.0250647	0.942827	4.36878e-06	-0.832353	0.000781375
ENSMUSG00000053835	15042	H2-T24	blue	-0.866969	0.000261343	0.957208	1.05151e-06	-0.874328	0.000199174
ENSMUSG00000035929	15015	H2-Q4	blue	0.532286	0.0748306	0.963156	5.0259e-07	-0.610328	0.0350616
ENSMUSG00000071661	75291	Zbtb3	blue	-0.393364	0.20585	0.705362	0.0103906	-0.548416	0.0648533
ENSMUSG00000028909	19273	Ptpru	blue	-0.539215	0.0704243	0.490793	0.105201	-0.527955	0.0776785
ENSMUSG00000021114	73834	Atp6v1d	blue	0.296894	0.348701	0.900315	6.54394e-05	-0.0934096	0.772778
ENSMUSG00000042726	231712	Trafd1	blue	-0.970766	1.60096e-07	0.966505	3.13892e-07	-0.951053	2.03755e-06
ENSMUSG00000044813	230126	Shb	blue	-0.786176	0.00242746	0.562899	0.0567146	-0.828536	0.000868553
ENSMUSG00000057948	70450	Unc13d	blue	-0.700271	0.0112122	0.82855	0.000868215	-0.358629	0.252312
ENSMUSG00000070427	16068	Il18bp	blue	0.978092	3.83139e-08	0.977694	4.18911e-08	-0.412527	0.182634
ENSMUSG00000018666	12412	Cbx1	blue	-0.506309	0.0930242	0.651287	0.0217794	-0.282093	0.374366
ENSMUSG00000045665	106073	Mfsd5	blue	-0.56659	0.0547604	0.886144	0.000124101	-0.707854	0.0100051
ENSMUSG00000023961	224794	Enpp4	blue	-0.93498	8.20029e-06	0.932279	1.00046e-05	-0.859453	0.000339483
ENSMUSG00000018167	59045	Stard3	blue	-0.859087	0.000343703	0.95032	2.19211e-06	-0.757555	0.00431789
ENSMUSG00000022469	223864	Rapgef3	blue	-0.707937	0.00999247	0.73189	0.00681126	-0.927394	1.40545e-05
ENSMUSG00000042190	14747	Cmklr1	blue	0.484533	0.1104	0.76215	0.0039571	-0.0538424	0.868008
ENSMUSG00000092243	630294	Gm7030	blue	-0.17361	0.589468	0.959561	7.95681e-07	-0.814462	0.00125653
ENSMUSG00000064264	232969	Zfp428	blue	-0.115539	0.720666	0.89585	8.08414e-05	-0.895236	8.31634e-05
ENSMUSG00000051048	320452	P4ha3	blue	-0.393962	0.2051	0.176275	0.583675	-0.489262	0.106457
ENSMUSG00000023452	320951	Pisd	blue	-0.189649	0.554955	0.900892	6.36315e-05	-0.747999	0.00514747
ENSMUSG00000026815	14582	Gfi1b	blue	0.447214	0.144928	0.703448	0.010694	NA	NA
ENSMUSG00000031774	102122	Fam192a	blue	-0.278754	0.380287	0.782229	0.00264092	-0.681936	0.0145754
ENSMUSG00000024277	212307	Mapre2	blue	-0.90522	5.12818e-05	0.949809	2.30523e-06	-0.754872	0.00453975
ENSMUSG00000052477	620078	C130026I21Rik	blue	-0.696907	0.0117811	0.882915	0.000141928	-0.635914	0.0262357
ENSMUSG00000007682	13371	Dio2	blue	-0.755538	0.00448387	0.609308	0.0354522	-0.852825	0.000422476
ENSMUSG00000073407	547347	Gm6034	blue	-0.434359	0.158259	0.383703	0.218205	-0.594517	0.0414737
ENSMUSG00000022204	68966	Ngdn	blue	0.198065	0.537187	0.76472	0.00376557	-0.0423091	0.896128
ENSMUSG00000070730	67809	Rmdn3	blue	0.761046	0.0040416	0.937952	6.52305e-06	-0.658523	0.019885
ENSMUSG00000023971	224823	Rrp36	blue	-0.799893	0.00178629	0.854276	0.000403089	-0.844512	0.00054795
ENSMUSG00000070034	109032	Sp110	blue	-0.636928	0.0259231	0.913825	3.23394e-05	-0.829959	0.000835225
ENSMUSG00000079003	666704	Samd1	blue	0.116257	0.718992	0.81154	0.00135152	-0.793019	0.00208881
ENSMUSG00000059436	17187	Max	blue	-0.786481	0.00241149	0.919323	2.3479e-05	-0.608645	0.0357081
ENSMUSG00000049686	109305	Orai1	blue	-0.539255	0.0703989	0.831989	0.000789378	-0.448382	0.143753
ENSMUSG00000006418	81018	Rnf114	blue	-0.899729	6.7319e-05	0.975182	7.11261e-08	-0.89068	0.000102077
ENSMUSG00000043668	244579	Tox3	blue	-0.0193244	0.952467	0.563055	0.0566311	-7.61427e-05	0.999813
ENSMUSG00000039910	17684	Cited2	blue	-0.271215	0.393833	0.938747	6.12406e-06	-0.874339	0.000199092
ENSMUSG00000035208	276950	Slfn8	blue	-0.718166	0.00852222	0.943071	4.2781e-06	-0.846765	0.00051141
ENSMUSG00000050002	75731	Idnk	blue	-0.914681	3.08101e-05	0.955506	1.27438e-06	-0.546953	0.0657182
ENSMUSG00000004446	12122	Bid	blue	-0.781323	0.00269192	0.958241	9.32206e-07	-0.556684	0.0601142
ENSMUSG00000092564	407803	BC051226	blue	-0.163096	0.61253	0.77103	0.00332505	-0.164511	0.609406
ENSMUSG00000060621	69547	Nkpd1	blue	0.372547	0.233016	0.490219	0.10567	-0.706311	0.0102425
ENSMUSG00000062783	114564	Csprs	blue	-0.807647	0.00148658	0.908687	4.28198e-05	-0.768818	0.00347478
ENSMUSG00000032643	14201	Fhl3	blue	0.938059	6.46809e-06	0.761254	0.00402563	0.0468468	0.88505
ENSMUSG00000065990	66077	Aurkaip1	blue	0.59414	0.0416358	0.883848	0.000136584	-0.00630518	0.984484
ENSMUSG00000014773	13388	Dll1	blue	0.276985	0.383444	0.938025	6.48532e-06	-0.494303	0.102358
ENSMUSG00000006411	71740	Nectin4	blue	-0.806632	0.00152344	0.752174	0.00477148	-0.84954	0.000469057
ENSMUSG00000030101	58911	Sumf1	blue	-0.735968	0.00635654	0.816632	0.00118934	-0.848891	0.000478712
ENSMUSG00000006010	226499	Odr4	blue	0.101901	0.752669	0.838898	0.000647788	-0.0613278	0.84983
ENSMUSG00000024672	109225	Ms4a7	blue	-0.987236	2.61131e-09	0.994129	5.43784e-11	-0.941018	5.08955e-06
ENSMUSG00000021725	52552	Parp8	blue	-0.943397	4.15946e-06	0.930519	1.13399e-05	-0.704494	0.0105275
ENSMUSG00000079017	76933	Ifi27l2a	blue	0.892278	9.50964e-05	0.89726	7.57009e-05	-0.112189	0.728491
ENSMUSG00000079507	15006	H2-Q1	blue	0.127489	0.692958	0.987206	2.64229e-09	-0.94379	4.01982e-06
ENSMUSG00000023025	207214	Larp4	blue	0.0331688	0.918493	0.949478	2.38086e-06	-0.23619	0.459872
ENSMUSG00000023913	27226	Pla2g7	blue	0.965595	3.58359e-07	0.995429	1.55962e-11	-0.470025	0.123096
ENSMUSG00000050505	219257	Pcdh20	blue	0.447214	0.144928	0.682001	0.0145621	NA	NA
ENSMUSG00000023010	110213	Tmbim6	blue	-0.234259	0.463655	0.968383	2.35947e-07	-0.429887	0.163073
ENSMUSG00000035949	30050	Fbxw2	blue	-0.622507	0.0306311	0.683238	0.0143147	-0.720104	0.00826301
ENSMUSG00000078490	544678	Cfap74	blue	0.18778	0.558933	0.888877	0.000110431	-0.154541	0.631537
ENSMUSG00000029500	72542	Pgam5	blue	0.453609	0.138573	0.739106	0.00602251	0.141056	0.661915
ENSMUSG00000038188	380713	Scarf1	blue	-0.143604	0.656137	0.989657	9.16114e-10	-0.728231	0.0072396
ENSMUSG00000015316	27218	Slamf1	blue	0.658839	0.0198051	0.958862	8.6587e-07	-0.0957423	0.76724
ENSMUSG00000039853	74735	Trim14	blue	-0.955424	1.28598e-06	0.925167	1.62842e-05	-0.812302	0.00132624
ENSMUSG00000015002	76740	Efr3a	blue	-0.796603	0.00192656	0.921699	2.03027e-05	-0.872529	0.000213179
ENSMUSG00000034116	22324	Vav1	blue	-0.64188	0.0244346	0.990185	7.05739e-10	-0.767427	0.00357146
ENSMUSG00000076444	791075	Mir761	blue	-0.0177989	0.956216	0.595462	0.0410687	0.00968971	0.976157
ENSMUSG00000068732	67495	Tmem167b	blue	0.3654	0.242811	0.698519	0.011506	-0.634203	0.0267696
ENSMUSG00000020962	83602	Gtf2a1	blue	0.708647	0.00988476	0.994339	4.53438e-11	-0.104517	0.746499
ENSMUSG00000011256	11492	Adam19	blue	-0.748733	0.00507975	0.822613	0.00101846	-0.885881	0.000125486
ENSMUSG00000042282	245650	Gucy2f	blue	0.447214	0.144928	0.686471	0.0136821	NA	NA
ENSMUSG00000025017	83490	Pik3ap1	blue	-0.307772	0.330457	0.984732	6.36829e-09	-0.89326	9.09966e-05
ENSMUSG00000015947	14129	Fcgr1	blue	-0.894252	8.69949e-05	0.943811	4.01241e-06	-0.852072	0.000432829
ENSMUSG00000062515	11770	Fabp4	blue	-0.171121	0.594896	0.980125	2.36207e-08	-0.783895	0.00254912
ENSMUSG00000038880	79044	Mrps34	blue	-0.203348	0.526156	0.708686	0.00987889	-0.623922	0.0301438
ENSMUSG00000072774	626391	Zfp951	blue	-0.129803	0.687631	0.660243	0.019453	-0.44243	0.149802
ENSMUSG00000090272	100040462	Mndal	blue	-0.864726	0.000283016	0.938996	6.0032e-06	-0.722526	0.00794737
ENSMUSG00000038179	75345	Slamf7	blue	-0.930939	1.10095e-05	0.96844	2.33852e-07	-0.898847	7.02241e-05
ENSMUSG00000024592	77422	C330018D20Rik	blue	-0.0902356	0.780329	0.817661	0.0011585	-0.124769	0.699235
ENSMUSG00000028962	20535	Slc4a2	blue	-0.0196247	0.95173	0.873869	0.000202675	-0.142518	0.658598
ENSMUSG00000030102	16438	Itpr1	blue	-0.88867	0.000111424	0.737309	0.00621217	-0.479715	0.114515
ENSMUSG00000085166	108169039	Gm15522	blue	0.18063	0.574261	0.709991	0.00968308	0.0390949	0.903986
ENSMUSG00000046718	69550	Bst2	blue	0.30939	0.32779	0.974273	8.50067e-08	-0.705515	0.0103665
ENSMUSG00000024472	70640	Dcp2	blue	-0.718237	0.00851266	0.857731	0.000359705	-0.425918	0.167424
ENSMUSG00000029581	14086	Fscn1	blue	0.896955	7.67898e-05	0.971827	1.33337e-07	-0.884069	0.000135345
ENSMUSG00000096727	16912	Psmb9	blue	-0.763188	0.00387884	0.963343	4.90112e-07	-0.901574	6.1546e-05
ENSMUSG00000006373	53328	Pgrmc1	blue	-0.585465	0.0454974	0.864833	0.000281944	-0.732819	0.00670559
ENSMUSG00000035852	78906	Misp	blue	-0.45563	0.136603	0.838713	0.000651306	-0.466493	0.126325
ENSMUSG00000058709	112406	Egln2	blue	0.195182	0.543246	0.771165	0.0033161	-0.62416	0.0300625
ENSMUSG00000039997	15950	Ifi203	blue	-0.87005	0.000233705	0.931603	1.05021e-05	-0.722215	0.00798741
ENSMUSG00000004070	15369	Hmox2	blue	-0.902637	5.84008e-05	0.82091	0.00106506	-0.923322	1.83354e-05
ENSMUSG00000054404	327978	Slfn5	blue	-0.473962	0.11956	0.956753	1.10777e-06	-0.791306	0.00216998
ENSMUSG00000020775	60441	Mrpl38	blue	0.112252	0.728344	0.976308	5.65019e-08	-0.29774	0.347264
ENSMUSG00000032180	17083	Tmed1	blue	0.857544	0.000361959	0.983361	9.76745e-09	-0.0190258	0.953201
ENSMUSG00000021752	71393	Kctd6	blue	0.614231	0.033595	0.646333	0.0231503	-0.82531	0.000947921
ENSMUSG00000022575	69146	Gsdmd	blue	0.270657	0.394846	0.988037	1.89108e-09	-0.768157	0.00352047
ENSMUSG00000079808	102638047	LOC102638047	blue	0.318504	0.31298	0.900125	6.60436e-05	-0.409304	0.18642
ENSMUSG00000073555	240327	Gm4951	blue	-0.801255	0.00173053	0.946577	3.13201e-06	-0.7745	0.00310015
ENSMUSG00000094796	625360	BC147527	blue	-0.789204	0.0022728	0.936526	7.28967e-06	-0.651868	0.0216227
ENSMUSG00000026770	16184	Il2ra	blue	-0.486973	0.108354	0.259456	0.415443	-0.582053	0.0470832
ENSMUSG00000027937	23922	Jtb	blue	0.506542	0.0928489	0.746734	0.0052657	-0.691205	0.0127937
ENSMUSG00000023143	27426	Nagpa	blue	-0.710112	0.0096652	0.787091	0.00237989	-0.298937	0.345235
ENSMUSG00000030341	21937	Tnfrsf1a	blue	-0.972291	1.22809e-07	0.952854	1.69452e-06	-0.851877	0.000435531
ENSMUSG00000041571	20364	Selenow	blue	0.461958	0.130553	0.974497	8.14084e-08	-0.433869	0.158782
ENSMUSG00000079457	665378	Gm7609	blue	-0.754396	0.00457998	0.931107	1.08792e-05	-0.672031	0.0166747
ENSMUSG00000040447	216892	Spns2	blue	0.210907	0.510548	0.50385	0.0948875	0.171855	0.593293
ENSMUSG00000040033	20847	Stat2	blue	-0.841061	0.000607777	0.938445	6.2731e-06	-0.798243	0.00185562
ENSMUSG00000026536	381308	Ifi211	blue	0.00863825	0.978744	0.96353	4.77892e-07	-0.739171	0.00601573
ENSMUSG00000025961	74426	4933402D24Rik	blue	-0.447214	0.144928	0.765483	0.00371004	-0.230447	0.47117
ENSMUSG00000002227	17454	Mov10	blue	-0.94181	4.76328e-06	0.908488	4.32742e-05	-0.661475	0.0191478
ENSMUSG00000030745	60504	Il21r	blue	-0.550543	0.0636102	0.659013	0.0197614	-0.140147	0.663982
ENSMUSG00000016206	14991	H2-M3	blue	-0.0359891	0.911586	0.968472	2.32683e-07	-0.349586	0.265333
ENSMUSG00000035517	100121	Tdrd7	blue	-0.879486	0.000162986	0.956171	1.18325e-06	-0.740272	0.00590187
ENSMUSG00000026739	12151	Bmi1	blue	-0.407924	0.188055	0.932292	9.99554e-06	-0.937947	6.52542e-06
ENSMUSG00000072844	654820	G530011O06Rik	blue	-0.451461	0.140687	0.864857	0.000281706	-0.360057	0.25029
ENSMUSG00000033444	74392	Specc1l	blue	-0.481748	0.112767	0.849971	0.000462724	-0.913228	3.34419e-05
ENSMUSG00000026535	26388	Ifi202b	blue	-0.839495	0.00063656	0.967026	2.90447e-07	-0.752835	0.0047139
ENSMUSG00000041645	27225	Ddx24	blue	-0.333677	0.289164	0.95843	9.11649e-07	-0.494286	0.102372
ENSMUSG00000067610	503550	Klri1	blue	-0.447214	0.144928	0.485177	0.109858	0.0215411	0.947021
ENSMUSG00000037321	21354	Tap1	blue	-0.660087	0.019492	0.948301	2.66617e-06	-0.776294	0.00298853
ENSMUSG00000070605	433791	Zfp992	blue	0.0134328	0.966951	0.967919	2.53592e-07	-0.981525	1.64324e-08
ENSMUSG00000063268	671535	Parp10	blue	-0.306581	0.33243	0.9582	9.36812e-07	-0.668402	0.0174967
ENSMUSG00000030610	76375	Det1	blue	-0.862248	0.000308555	0.938474	6.25845e-06	-0.470255	0.122888
ENSMUSG00000004902	71803	Slc25a18	blue	-0.541034	0.0692976	0.687359	0.0135121	-0.154494	0.631642
ENSMUSG00000037921	234311	Ddx60	blue	-0.361522	0.248226	0.95257	1.74531e-06	-0.702627	0.0108263
ENSMUSG00000049580	244152	Tsku	blue	-0.603195	0.0378595	0.923874	1.77016e-05	-0.332509	0.29096
ENSMUSG00000030966	20821	Trim21	blue	-0.954201	1.46918e-06	0.985399	5.09983e-09	-0.831563	0.000798844
ENSMUSG00000024677	69774	Ms4a6b	blue	-0.924059	1.74922e-05	0.829091	0.000855436	-0.973262	1.02904e-07
ENSMUSG00000024679	68774	Ms4a6d	blue	-0.591917	0.0426023	0.975894	6.15637e-08	-0.706068	0.0102802
ENSMUSG00000094514	102636558	LOC102636558	blue	-0.553614	0.0618449	0.936366	7.38033e-06	-0.50255	0.0958829
ENSMUSG00000002580	103742	Mien1	blue	-0.800234	0.00177219	0.904922	5.2067e-05	-0.184963	0.564951
ENSMUSG00000037525	75284	Bcdin3d	blue	-0.308794	0.328771	0.410019	0.185576	-0.669605	0.0172209
ENSMUSG00000030611	67994	Mrps11	blue	0.688237	0.0133456	0.89725	7.57337e-05	0.142107	0.659531
ENSMUSG00000022587	17069	Ly6e	blue	-0.630669	0.0278969	0.927921	1.35643e-05	-0.529866	0.0764129
ENSMUSG00000037965	106205	Zc3h7a	blue	-0.447788	0.144349	0.771324	0.00330554	-0.155313	0.629814
ENSMUSG00000035513	171171	Ntng2	blue	-0.624888	0.0298143	0.387823	0.212884	-0.597888	0.0400418
ENSMUSG00000037169	18109	Mycn	blue	0.652775	0.0213796	0.703483	0.0106885	0.447214	0.144928
ENSMUSG00000056268	329260	Dennd1b	blue	-0.864718	0.000283097	0.805029	0.00158306	-0.916534	2.76955e-05
ENSMUSG00000024308	21356	Tapbp	blue	-0.517111	0.0851321	0.988253	1.72693e-09	-0.806762	0.00151867
ENSMUSG00000006412	18637	Pfdn2	blue	-0.0852546	0.792214	0.900851	6.3758e-05	-0.0440285	0.891928
ENSMUSG00000024786	622554	Majin	blue	0.285644	0.368121	0.974616	7.95471e-08	-0.0510558	0.874791
ENSMUSG00000024132	13177	Eci1	blue	-0.746442	0.0052933	0.894803	8.48327e-05	-0.810073	0.00140125
ENSMUSG00000001166	114643	Oas1c	blue	0.301385	0.341106	0.942611	4.45028e-06	-0.364901	0.243504
ENSMUSG00000027434	18088	Nkx2-2	blue	NA	NA	0.705168	0.010421	NA	NA
ENSMUSG00000027833	20429	Shox2	blue	NA	NA	0.705168	0.010421	NA	NA
ENSMUSG00000030800	76560	Prss8	blue	NA	NA	0.705168	0.010421	NA	NA
ENSMUSG00000038311	675325	2410017I17Rik	blue	NA	NA	0.705168	0.010421	NA	NA
ENSMUSG00000070979	11470	Actl7a	blue	NA	NA	0.705168	0.010421	NA	NA
ENSMUSG00000086136	622167	Gm12718	blue	NA	NA	0.705168	0.010421	NA	NA
ENSMUSG00000098389	102466212	Mir6983	blue	NA	NA	0.705168	0.010421	NA	NA
ENSMUSG00000001508	20391	Sgca	blue	NA	NA	0.705168	0.010421	NA	NA
ENSMUSG00000060802	12010	B2m	blue	0.716386	0.00876559	0.983424	9.58611e-09	-0.397838	0.200277
ENSMUSG00000027189	80985	Trim44	blue	-0.812875	0.00130747	0.946405	3.18175e-06	-0.181097	0.573253
ENSMUSG00000041881	66416	Ndufa7	blue	-0.313732	0.320687	0.933855	8.91761e-06	-0.745348	0.00539753
ENSMUSG00000019505	22187	Ubb	blue	0.0957329	0.767263	0.886845	0.000120479	-0.0551264	0.864886
ENSMUSG00000094915	671917	LOC671917	blue	-0.712052	0.00937995	0.908649	4.29052e-05	-0.469699	0.123392
ENSMUSG00000006782	12799	Cnp	blue	-0.821535	0.00104777	0.939691	5.67552e-06	-0.574924	0.0505218
ENSMUSG00000020648	71916	Dus4l	blue	0.0756904	0.815146	0.845653	0.000529206	-0.056575	0.861365
ENSMUSG00000003863	76787	Ppfia3	blue	0.368736	0.23821	0.961014	6.64272e-07	-0.0183558	0.954848
ENSMUSG00000046031	215900	Calhm6	blue	-0.639123	0.0252557	0.950787	2.09252e-06	-0.741232	0.00580389
ENSMUSG00000041028	66092	Ghitm	blue	0.451791	0.140361	0.99043	6.22197e-10	-0.292864	0.355595
ENSMUSG00000030281	171095	Il17rc	blue	-0.260853	0.412846	0.811564	0.00135072	-0.0313731	0.922894
ENSMUSG00000032690	246728	Oas2	blue	-0.727895	0.00727992	0.956674	1.11778e-06	-0.527748	0.0778161
ENSMUSG00000042572	70093	Ube2q1	blue	-0.836339	0.000697731	0.987003	2.85808e-09	-0.594022	0.041687
ENSMUSG00000024245	68027	Tmem178	blue	-0.438448	0.153937	0.778042	0.00288274	-0.131854	0.682919
ENSMUSG00000026657	209630	Frmd4a	blue	-0.736149	0.00633693	0.957611	1.00365e-06	-0.691026	0.0128266
ENSMUSG00000051716	28194	Apon	blue	-0.447214	0.144928	0.624702	0.0298777	0.0215411	0.947021
ENSMUSG00000022365	67819	Derl1	blue	-0.599825	0.039235	0.804597	0.00159944	-0.776163	0.00299658
ENSMUSG00000072889	100978	Nfxl1	blue	-0.47316	0.120276	0.936197	7.47646e-06	-0.483439	0.111326
ENSMUSG00000039304	22035	Tnfsf10	blue	-0.580862	0.0476456	0.973919	9.09723e-08	-0.654416	0.0209449
ENSMUSG00000029561	23962	Oasl2	blue	-0.689054	0.013192	0.967624	2.65319e-07	-0.58612	0.0451971
ENSMUSG00000044221	231413	Grsf1	blue	0.0820509	0.799879	0.900258	6.56199e-05	-0.856324	0.000376912
ENSMUSG00000037075	75841	Rnf139	blue	-0.463846	0.128782	0.849857	0.000464389	-0.817672	0.00115817
ENSMUSG00000037296	67207	Lsm1	blue	-0.485402	0.109668	0.561277	0.0575884	-0.747015	0.00523928
ENSMUSG00000034974	13144	Dapk3	blue	-0.126163	0.696017	0.922339	1.95078e-05	-0.24577	0.441313
ENSMUSG00000039699	74481	Batf2	blue	-0.757576	0.00431621	0.939402	5.80967e-06	-0.687236	0.0135357
ENSMUSG00000017747	80860	Ghdc	blue	-0.792399	0.00211789	0.895812	8.09827e-05	-0.213848	0.50453
ENSMUSG00000032624	78798	Eml4	blue	-0.472892	0.120514	0.90245	5.89438e-05	-0.897736	7.40242e-05
ENSMUSG00000025264	69499	Tsr2	blue	0.636561	0.026036	0.976753	5.14251e-08	0.0727088	0.822323
ENSMUSG00000002307	13163	Daxx	blue	0.6254	0.029641	0.953516	1.58052e-06	-0.465726	0.127033
ENSMUSG00000038467	75608	Chmp4b	blue	0.220427	0.491184	0.957735	9.89292e-07	-0.130208	0.6867
ENSMUSG00000062007	209488	Hsh2d	blue	0.447214	0.144928	0.674373	0.0161594	0.447214	0.144928
ENSMUSG00000029826	78781	Zc3hav1	blue	-0.670705	0.0169715	0.963508	4.79366e-07	-0.498757	0.0988256
ENSMUSG00000057933	14858	Gsta2	blue	-0.0177989	0.956216	0.819498	0.00110493	0.00968971	0.976157
ENSMUSG00000026482	19731	Rgl1	blue	-0.973388	1.00532e-07	0.974885	7.54455e-08	-0.535719	0.0726242
ENSMUSG00000016496	60533	Cd274	blue	0.992641	1.67935e-10	0.965032	3.88239e-07	-0.499255	0.0984355
ENSMUSG00000022305	239393	Lrp12	blue	-0.114647	0.722748	0.991099	4.33502e-10	-0.177722	0.580539
ENSMUSG00000053469	21819	Tg	blue	0.466457	0.126359	0.876631	0.00018232	0.101548	0.753502
ENSMUSG00000072621	237887	Slfn10-ps	blue	0.952864	1.69264e-06	0.963788	4.61444e-07	0.289125	0.362053
ENSMUSG00000032661	246727	Oas3	blue	-0.593299	0.0419996	0.934752	8.34213e-06	-0.510178	0.090143
ENSMUSG00000033355	67775	Rtp4	blue	-0.718612	0.00846208	0.978241	3.70364e-08	-0.555554	0.0607472
ENSMUSG00000061232	14972	H2-K1	blue	0.932073	1.01544e-05	0.993686	7.81858e-11	-0.397238	0.201019
ENSMUSG00000034422	547253	Parp14	blue	-0.861522	0.000316366	0.971468	1.41956e-07	-0.66079	0.019317
ENSMUSG00000029798	67138	Herc6	blue	-0.867501	0.000256398	0.949792	2.30909e-06	-0.759312	0.00417714
ENSMUSG00000037849	102639543	Ifi206	blue	-0.641423	0.0245694	0.93534	7.98092e-06	-0.598339	0.0398529
ENSMUSG00000066900	71954	Suds3	blue	-0.0785917	0.808175	0.882952	0.000141711	-0.806766	0.00151853
ENSMUSG00000017830	80861	Dhx58	blue	-0.603774	0.0376267	0.95147	1.95367e-06	-0.533037	0.0743439
ENSMUSG00000094054	100503923	LOC100503923	blue	-0.491504	0.104621	0.956892	1.0904e-06	-0.344417	0.272947
ENSMUSG00000066677	100033459	Ifi208	blue	-0.379068	0.224289	0.932889	9.5725e-06	-0.454328	0.137871
ENSMUSG00000028042	22724	Zbtb7b	blue	-0.6442	0.0237592	0.934229	8.67383e-06	-0.403698	0.193118
ENSMUSG00000069844	52892	Sco1	blue	0.107431	0.739646	0.951077	2.03278e-06	-0.032067	0.921193
ENSMUSG00000061650	192191	Med9	blue	-0.705815	0.0103197	0.768136	0.00352191	-0.852874	0.000421813
ENSMUSG00000040528	380732	Milr1	blue	0.448979	0.143155	0.945179	3.55534e-06	-0.047942	0.882379
ENSMUSG00000024359	15526	Hspa9	blue	0.950102	2.23979e-06	0.996671	3.20084e-12	0.456404	0.135853
ENSMUSG00000024079	19106	Eif2ak2	blue	-0.471185	0.122047	0.960836	6.79427e-07	-0.467888	0.125044
ENSMUSG00000025353	66844	Ormdl2	blue	0.245198	0.442411	0.850252	0.000458631	-0.917223	2.6603e-05
ENSMUSG00000037997	101187	Parp11	blue	-0.964281	4.31237e-07	0.941851	4.74682e-06	-0.735221	0.0064381
ENSMUSG00000073144	75379	4930599N23Rik	blue	-0.687233	0.0135363	0.659944	0.0195277	-0.814237	0.00126365
ENSMUSG00000041481	20715	Serpina3g	blue	NA	NA	0.777579	0.00291052	0.447214	0.144928
ENSMUSG00000046879	15944	Irgm1	blue	-0.867566	0.000255798	0.965467	3.64952e-07	-0.600014	0.039157
ENSMUSG00000039899	14190	Fgl2	blue	-0.972533	1.17568e-07	0.976852	5.03475e-08	-0.945845	3.34833e-06
ENSMUSG00000023341	17858	Mx2	blue	-0.555592	0.0607261	0.960842	6.78846e-07	-0.607944	0.0359798
ENSMUSG00000043263	236312	Ifi209	blue	-0.647709	0.0227632	0.933958	8.84998e-06	-0.597354	0.0402664
ENSMUSG00000066861	23960	Oas1g	blue	-0.468651	0.124345	0.964693	4.07232e-07	-0.465683	0.127074
ENSMUSG00000039146	15061	Ifi44l	blue	-0.752352	0.00475593	0.969387	2.01144e-07	-0.388522	0.211989
ENSMUSG00000044309	108956	Apol7c	blue	NA	NA	0.821578	0.00104659	NA	NA
ENSMUSG00000035759	71769	Bbs10	blue	-0.761719	0.00398992	0.311687	0.324021	-0.662505	0.0188954
ENSMUSG00000038213	213233	Tapbpl	blue	-0.88666	0.000121424	0.980343	2.23616e-08	-0.724095	0.00774778
ENSMUSG00000040483	327959	Xaf1	blue	-0.77109	0.00332111	0.967418	2.73782e-07	-0.553955	0.0616514
ENSMUSG00000027078	56791	Ube2l6	blue	-0.751339	0.00484495	0.958833	8.68915e-07	-0.544158	0.0673921
ENSMUSG00000073491	623121	Ifi213	blue	-0.564217	0.0560112	0.957595	1.0055e-06	-0.505384	0.0937221
ENSMUSG00000026896	71586	Ifih1	blue	-0.746922	0.00524796	0.967066	2.88706e-07	-0.532569	0.0746469
ENSMUSG00000033880	19039	Lgals3bp	blue	-0.117246	0.716689	0.978142	3.78813e-08	-0.390077	0.210005
ENSMUSG00000035041	208677	Creb3l3	blue	-0.635382	0.0264011	0.757	0.00436313	-0.0893703	0.782391
ENSMUSG00000022702	15260	Hira	blue	0.264788	0.405573	0.464752	0.127937	0.229962	0.472129
ENSMUSG00000068015	380916	Lrch1	blue	-0.528656	0.0772127	0.425865	0.167481	-0.800969	0.00174212
ENSMUSG00000024675	64380	Ms4a4c	blue	-0.901871	6.06532e-05	0.910269	3.93453e-05	-0.543485	0.0677993
ENSMUSG00000070501	545384	Ifi214	blue	-0.483397	0.111361	0.94232	4.56193e-06	-0.380709	0.222123
ENSMUSG00000050212	230752	Eva1b	blue	-0.789388	0.00226363	0.876538	0.000182973	-0.384734	0.216866
ENSMUSG00000067297	112419	Ifit1bl2	blue	-0.370869	0.235295	0.952247	1.80449e-06	-0.434224	0.158403
ENSMUSG00000052776	246730	Oas1a	blue	-0.531228	0.0755195	0.965441	3.66322e-07	-0.37238	0.233242
ENSMUSG00000068040	99237	Tm9sf4	blue	-0.587436	0.0445986	0.95363	1.56155e-06	-0.242821	0.446988
ENSMUSG00000079491	15024	H2-T10	blue	-0.645991	0.0232471	0.945559	3.43607e-06	-0.383664	0.218256
ENSMUSG00000069874	54396	Irgm2	blue	-0.848709	0.000481446	0.969541	1.96171e-07	-0.567683	0.0541904
ENSMUSG00000009035	223693	Tmem184b	blue	0.915043	3.01814e-05	0.920213	2.22473e-05	0.743052	0.00562149
ENSMUSG00000054203	226695	Ifi205	blue	0.638624	0.0254062	0.969139	2.09324e-07	-0.467708	0.125208
ENSMUSG00000039410	70673	Prdm16	blue	-0.0923819	0.775221	0.501339	0.0968154	-0.636232	0.0261374
ENSMUSG00000029152	68095	Ociad1	blue	-0.10125	0.754204	0.630093	0.0280839	-0.628205	0.0287032
ENSMUSG00000032897	18046	Nfyc	blue	0.175174	0.586067	0.886118	0.000124241	0.119973	0.710347
ENSMUSG00000051455	268491	Meioc	blue	-0.341508	0.277286	0.449018	0.143116	-0.629085	0.0284132
ENSMUSG00000039735	214459	Fnbp1l	blue	0.538156	0.0710855	0.999532	1.76775e-16	-0.253327	0.426934
ENSMUSG00000029815	75593	Malsu1	blue	0.299073	0.345005	0.910004	3.99113e-05	0.0846614	0.793632
ENSMUSG00000079222	664787	LOC664787	blue	-0.147684	0.646923	0.560379	0.0580767	-0.620655	0.0312775
ENSMUSG00000026222	20684	Sp100	blue	-0.793061	0.00208685	0.94903	2.48642e-06	-0.386026	0.215196
ENSMUSG00000032042	67398	Srpr	blue	0.729914	0.00704016	0.961458	6.27826e-07	0.192601	0.548695
ENSMUSG00000027514	58203	Zbp1	blue	-0.512626	0.0883517	0.948644	2.58027e-06	-0.414204	0.180684
ENSMUSG00000057596	209387	Trim30d	blue	-0.82803	0.000880657	0.946553	3.13885e-06	-0.544321	0.0672937
ENSMUSG00000030149	27007	Klrk1	blue	-0.878505	0.00016944	0.92948	1.21922e-05	-0.439976	0.152341
ENSMUSG00000055850	66510	Rnf181	blue	-0.747507	0.00519324	0.857822	0.000358613	-0.88424	0.000134388
ENSMUSG00000036381	140795	P2ry14	blue	-0.905912	4.94971e-05	0.889173	0.000109026	-0.489218	0.106493
ENSMUSG00000030107	24110	Usp18	blue	-0.722456	0.00795632	0.958185	9.38429e-07	-0.478663	0.115427
ENSMUSG00000026104	20846	Stat1	blue	-0.766636	0.00362738	0.964976	3.91316e-07	-0.465671	0.127085
ENSMUSG00000002981	56457	Clptm1	blue	0.874481	0.000198024	0.949329	2.41548e-06	0.393369	0.205845
ENSMUSG00000034220	14733	Gpc1	blue	0.466908	0.125943	0.899913	6.67235e-05	0.190633	0.552865
ENSMUSG00000000386	17857	Mx1	blue	-0.366433	0.241381	0.940459	5.33006e-06	-0.325968	0.301132
ENSMUSG00000090125	18991	Pou3f1	blue	-0.692818	0.012501	0.861309	0.000318692	-0.0979631	0.761977
ENSMUSG00000066148	70052	Prpf4	blue	0.437385	0.155053	0.951096	2.02879e-06	0.191994	0.54998
ENSMUSG00000028457	320571	Atp8b5	blue	-0.45052	0.141619	0.834079	0.000744248	-0.89623	7.94305e-05
ENSMUSG00000078763	20555	Slfn1	blue	-0.637789	0.0256598	0.942856	4.358e-06	-0.284265	0.370539
ENSMUSG00000029752	27053	Asns	blue	0.978318	3.63865e-08	0.997698	5.06761e-13	0.403825	0.192964
ENSMUSG00000078853	16145	Igtp	blue	-0.922588	1.92057e-05	0.953469	1.58851e-06	-0.633176	0.0270937
ENSMUSG00000068246	71898	Apol9b	blue	-0.0193244	0.952467	0.918254	2.50306e-05	-0.0177263	0.956395
ENSMUSG00000038507	243771	Parp12	blue	-0.790053	0.00223082	0.957342	1.03545e-06	-0.35093	0.263373
ENSMUSG00000030327	67602	Necap1	blue	0.901609	6.14385e-05	0.991443	3.56168e-10	0.249101	0.434946
ENSMUSG00000078810	243816	Gp6	blue	NA	NA	0.916442	2.78442e-05	NA	NA
ENSMUSG00000074896	15959	Ifit3	blue	-0.62264	0.0305849	0.948904	2.51673e-06	-0.334457	0.287968
ENSMUSG00000039501	98999	Znfx1	blue	-0.901915	6.05217e-05	0.954667	1.39713e-06	-0.461524	0.130961
ENSMUSG00000068739	20226	Sars	blue	-0.786708	0.0023997	0.964412	4.2347e-07	-0.278083	0.381483
ENSMUSG00000025498	54123	Irf7	blue	-0.45619	0.13606	0.950418	2.17089e-06	-0.205103	0.522514
ENSMUSG00000078920	15953	Ifi47	blue	-0.760766	0.00406325	0.95719	1.05377e-06	-0.33279	0.290528
ENSMUSG00000045932	15958	Ifit2	blue	-0.62124	0.0310721	0.937592	6.71025e-06	-0.232825	0.466475
ENSMUSG00000054072	60440	Iigp1	blue	-0.651114	0.0218264	0.9649	3.95565e-07	-0.534121	0.0736458
ENSMUSG00000019927	216080	Ube2d1	blue	-0.157348	0.625277	0.312859	0.322108	-0.490664	0.105306
ENSMUSG00000030921	20128	Trim30a	blue	-0.845519	0.000531382	0.975206	7.07802e-08	-0.393365	0.205849
ENSMUSG00000062488	667370	Ifit3b	blue	-0.610628	0.0349473	0.9495	2.37573e-06	-0.239892	0.452658
ENSMUSG00000000194	277463	Gpr107	blue	-0.994539	3.79082e-11	0.953445	1.59253e-06	-0.486538	0.108717
ENSMUSG00000051906	69142	Cd209f	blue	-0.857078	0.000367617	0.988101	1.84166e-09	-0.867353	0.000257763
ENSMUSG00000029474	80751	Rnf34	blue	-0.601947	0.0383648	0.917881	2.559e-05	-0.969325	2.03145e-07
ENSMUSG00000070327	672511	Rnf213	blue	-0.837475	0.000675209	0.905959	4.93775e-05	-0.216148	0.499846
ENSMUSG00000079363	17472	Gbp4	blue	-0.888038	0.000114495	0.944871	3.65454e-06	-0.194149	0.545424
ENSMUSG00000028233	116940	Tgs1	blue	-0.989629	9.28502e-10	0.992043	2.47824e-10	-0.890164	0.000104418
ENSMUSG00000079168	70192	Cd209g	blue	-0.34995	0.264801	0.983174	1.03261e-08	-0.470485	0.122679
ENSMUSG00000078921	100039796	Tgtp2	blue	-0.911611	3.65741e-05	0.938721	6.13645e-06	-0.194716	0.544227
ENSMUSG00000092021	634650	Gbp11	blue	-0.447214	0.144928	0.953259	1.62409e-06	-0.0135532	0.966654
ENSMUSG00000062310	14659	Glrp1	blue	0.792076	0.00213319	0.979296	2.89367e-08	0.293032	0.355306
ENSMUSG00000031780	20295	Ccl17	blue	NA	NA	0.960814	6.81286e-07	NA	NA
ENSMUSG00000041827	231655	Oasl1	blue	0.454849	0.137362	0.949028	2.48685e-06	0.195651	0.542257
ENSMUSG00000035692	100038882	Isg15	blue	-0.524185	0.0802169	0.9404	5.35605e-06	0.0446841	0.890327
ENSMUSG00000078922	21822	Tgtp1	blue	-0.853352	0.000415351	0.938086	6.45409e-06	-0.0860431	0.79033
ENSMUSG00000049598	240916	Vsig8	blue	0.0331591	0.918517	0.890902	0.000101085	0.0585884	0.856475
ENSMUSG00000037902	19261	Sirpa	blue	-0.875425	0.000191002	0.988239	1.73732e-09	-0.303617	0.337364
ENSMUSG00000043323	381668	Fbrsl1	blue	0.843699	0.00056162	0.947242	2.94534e-06	0.432624	0.160116
ENSMUSG00000068245	219132	Phf11d	blue	-0.554353	0.0614251	0.958546	8.99177e-07	-0.0901623	0.780504
ENSMUSG00000020142	55963	Slc1a4	blue	0.319953	0.310659	0.957672	9.96563e-07	0.169847	0.597684
ENSMUSG00000024338	16913	Psmb8	blue	-0.665066	0.0182783	0.977373	4.49727e-08	-0.156414	0.627358
ENSMUSG00000034575	210106	Tent4a	blue	0.417286	0.177133	0.969563	1.95484e-07	0.161955	0.615052
ENSMUSG00000048330	320360	Ric3	blue	-0.0566751	0.861122	0.921033	2.11563e-05	0.0989382	0.759669
ENSMUSG00000021624	17079	Cd180	blue	-0.87055	0.000229452	0.907078	4.65978e-05	-0.205197	0.522319
ENSMUSG00000024851	18739	Pitpnm1	blue	-0.124964	0.698785	0.945258	3.53026e-06	-0.746145	0.00532143
ENSMUSG00000037443	70012	Cep85	blue	0.975273	6.9839e-08	0.999061	5.73263e-15	0.755745	0.00446661
ENSMUSG00000056116	15039	H2-T22	blue	-0.790766	0.00219605	0.961441	6.29179e-07	-0.0101548	0.975013
ENSMUSG00000029784	75647	Ssmem1	blue	NA	NA	0.995074	2.2664e-11	NA	NA
ENSMUSG00000078606	100042856	Gm4070	blue	-0.773542	0.00316107	0.933737	8.99547e-06	-0.103701	0.748422
ENSMUSG00000037816	109082	Fbxw17	blue	-0.163492	0.611656	0.961548	6.20602e-07	0.043086	0.89423
ENSMUSG00000039217	16173	Il18	blue	-0.225601	0.480801	0.865508	0.000275304	0.347722	0.268065
ENSMUSG00000029530	12769	Ccr9	blue	0.746436	0.00529378	0.83276	0.000772493	0.642973	0.0241149
ENSMUSG00000078908	270096	Mon1b	blue	-0.593927	0.0417279	0.913067	3.37424e-05	-0.0402562	0.901146
ENSMUSG00000045868	74558	Gvin1	blue	-0.774072	0.00312727	0.933051	9.46013e-06	-0.0962039	0.766146
ENSMUSG00000022906	80285	Parp9	blue	-0.862607	0.000304745	0.956684	1.1166e-06	-0.221735	0.48855
ENSMUSG00000034459	15957	Ifit1	blue	-0.635806	0.0262694	0.959743	7.78217e-07	0.157822	0.624222
ENSMUSG00000036402	14701	Gng12	blue	-0.164481	0.609473	0.996158	6.54944e-12	0.0187909	0.953779
ENSMUSG00000028331	74753	Trmo	blue	0.0669628	0.83619	0.571205	0.0523836	-0.615342	0.0331856
ENSMUSG00000020641	58185	Rsad2	blue	-0.187322	0.559911	0.954109	1.4838e-06	0.635288	0.0264304
ENSMUSG00000030790	11535	Adm	blue	0.547935	0.0651368	0.946286	3.21666e-06	0.315938	0.317112
ENSMUSG00000025962	75619	Fastkd2	blue	0.568174	0.0539363	0.918164	2.51645e-05	0.181221	0.572986
ENSMUSG00000066151	338355	Fkbp15	blue	-0.987445	2.40524e-09	0.991436	3.57721e-10	-0.557082	0.0598924
ENSMUSG00000035042	20304	Ccl5	blue	0.953606	1.56563e-06	0.928293	1.32261e-05	0.960129	7.42127e-07
ENSMUSG00000066363	238393	Serpina3f	blue	NA	NA	0.828684	0.000865044	0.596919	0.0404495
ENSMUSG00000040296	230073	Ddx58	blue	-0.788884	0.00228879	0.967946	2.52514e-07	-0.0351536	0.913632
ENSMUSG00000020225	68212	Tmbim4	blue	0.348296	0.267221	0.984046	7.92602e-09	0.14944	0.64297
ENSMUSG00000020572	59027	Nampt	blue	-0.296459	0.349443	0.988127	1.82131e-09	0.051135	0.874598
ENSMUSG00000028692	58810	Akr1a1	blue	0.420596	0.173369	0.986311	3.69971e-09	0.194585	0.544503
ENSMUSG00000020638	22169	Cmpk2	blue	-0.492743	0.103615	0.9568	1.10193e-06	0.543872	0.0675647
ENSMUSG00000073490	226691	Ifi207	blue	-0.846771	0.000511316	0.855306	0.000389757	-0.959471	8.04451e-07
ENSMUSG00000039725	381406	Trp53rka	blue	0.964491	4.18878e-07	0.989628	9.29166e-10	0.628724	0.0285319
ENSMUSG00000023307	69104	2020-03-05	blue	0.889436	0.000107788	0.955923	1.2165e-06	0.598005	0.039993
ENSMUSG00000040354	216443	Mars	blue	0.792677	0.00210483	0.994651	3.41754e-11	0.1778	0.580371
ENSMUSG00000075330	68162	A930003A15Rik	blue	-0.705478	0.0103725	0.972639	1.1535e-07	0.0100676	0.975228
ENSMUSG00000040264	14468	Gbp2b	blue	0.872065	0.000216907	0.94762	2.84316e-06	0.990501	5.99498e-10
ENSMUSG00000030738	56347	Eif3c	blue	0.654376	0.0209555	0.990825	5.0433e-10	0.386102	0.215097
ENSMUSG00000025010	240665	Ccnj	blue	0.845799	0.000526844	0.959438	8.0767e-07	0.458431	0.133903
ENSMUSG00000029782	72649	Tmem209	blue	-0.866211	0.000268513	0.969421	2.00023e-07	-0.132694	0.680994
ENSMUSG00000039236	57444	Isg20	blue	-0.35571	0.256472	0.921968	1.99648e-05	0.466834	0.126011
ENSMUSG00000078954	73167	Arhgap8	blue	-0.447214	0.144928	0.823764	0.000987873	0.208488	0.515521
ENSMUSG00000038390	14788	Gpr162	blue	-0.944917	3.63965e-06	0.99012	7.2942e-10	-0.505098	0.0939386
ENSMUSG00000047843	55950	Bri3	blue	-0.447796	0.144341	0.913613	3.27272e-05	-0.912527	3.47727e-05
ENSMUSG00000025793	15239	Hgs	blue	-0.706014	0.0102886	0.846341	0.000518137	-0.934155	8.72153e-06
ENSMUSG00000051319	67885	Mtln	blue	0.812257	0.00132773	0.955917	1.21733e-06	0.253877	0.425896
ENSMUSG00000018986	20557	Slfn3	blue	0.584151	0.0461034	0.90597	4.93485e-05	0.556819	0.0600393
ENSMUSG00000024613	21453	Tcof1	blue	-0.958288	9.27045e-07	0.938726	6.13439e-06	-0.122589	0.704279
ENSMUSG00000019977	56422	Hbs1l	blue	-0.0182167	0.95519	0.886611	0.000121676	0.0872644	0.787413
ENSMUSG00000028037	99899	Ifi44	blue	-0.610695	0.0349218	0.963248	4.96469e-07	0.0611568	0.850245
ENSMUSG00000060183	56066	Cxcl11	blue	0.647312	0.0228745	0.964255	4.32813e-07	0.927594	1.38672e-05
ENSMUSG00000079339	667373	Ifit1bl1	blue	-0.564807	0.0556984	0.968833	2.19805e-07	0.704669	0.0104997
ENSMUSG00000079190	100041057	LOC100041057	blue	-0.855233	0.000390681	0.912809	3.42314e-05	-0.0433142	0.893673
ENSMUSG00000027360	15186	Hdc	blue	0.447214	0.144928	0.9118	3.61954e-05	0.866836	0.000262594
ENSMUSG00000040351	70797	Ankib1	blue	-0.127014	0.694052	0.98014	2.35352e-08	0.486319	0.108899
ENSMUSG00000004069	83945	Dnaja3	blue	-0.489371	0.106367	0.982481	1.26214e-08	0.101349	0.753972
ENSMUSG00000029417	17329	Cxcl9	blue	0.693163	0.0124389	0.998755	2.35038e-14	0.534848	0.0731796
ENSMUSG00000067642	381628	Adgrf3	blue	-0.797122	0.00190389	0.885041	0.000129984	0.0433029	0.8937
ENSMUSG00000000791	16161	Il12rb1	blue	0.203231	0.526401	0.923789	1.7798e-05	0.350196	0.264442
ENSMUSG00000063800	230596	Prpf38a	blue	0.978925	3.16082e-08	0.879465	0.000163125	0.876873	0.000180609
ENSMUSG00000074227	20733	Spint2	blue	0.707909	0.00999678	0.91934	2.34556e-05	0.459339	0.133035
ENSMUSG00000042766	360213	Trim46	blue	-0.0994588	0.758438	0.810656	0.00138134	0.119379	0.711728
ENSMUSG00000028538	20441	St3gal3	blue	0.00601417	0.9852	0.980386	2.21221e-08	0.311182	0.324848
ENSMUSG00000027534	74718	Snx16	blue	-0.378047	0.225642	0.799785	0.00179073	0.0997586	0.757729
ENSMUSG00000052852	52250	Reep1	blue	0.0935873	0.772356	0.806808	0.00151701	0.491354	0.104743
ENSMUSG00000010358	70110	Ifi35	blue	-0.415531	0.17915	0.966661	3.06725e-07	0.34002	0.279522
ENSMUSG00000025193	66388	Cutc	blue	-0.794667	0.00201295	0.706581	0.0102007	-0.946331	3.20357e-06
ENSMUSG00000031960	234734	Aars	blue	0.906243	4.86605e-05	0.986685	3.22267e-09	0.811419	0.00135559
ENSMUSG00000008438	56622	Adam21	blue	-0.179799	0.576052	0.196325	0.540839	-0.610944	0.0348271
ENSMUSG00000028458	21754	Tesk1	blue	-0.126311	0.695674	0.966548	3.11876e-07	0.172057	0.592853
ENSMUSG00000035530	20918	Eif1	blue	0.840582	0.000616483	0.997433	8.74237e-13	0.728969	0.00715162
ENSMUSG00000025792	27376	Slc25a10	blue	0.848875	0.000478948	0.996734	2.91188e-12	0.672602	0.0165479
ENSMUSG00000024789	16452	Jak2	blue	0.981117	1.83205e-08	0.991821	2.84296e-10	0.757596	0.00431457
ENSMUSG00000068735	277414	Trp53i11	blue	0.107388	0.739747	0.953282	1.62005e-06	0.583251	0.046522
ENSMUSG00000022014	108670	Epsti1	blue	-0.107636	0.739165	0.970876	1.57152e-07	0.412792	0.182326
ENSMUSG00000053820	12046	Bcl2a1c	blue	0.767902	0.0035382	0.927965	1.35241e-05	0.685401	0.0138892
ENSMUSG00000058835	11308	Abi1	blue	0.578991	0.0485394	0.975012	7.35713e-08	0.30564	0.333992
ENSMUSG00000028268	55932	Gbp3	blue	-0.62502	0.0297696	0.941702	4.80666e-06	0.889933	0.000105475
ENSMUSG00000032175	54721	Tyk2	blue	-0.974985	7.39676e-08	0.964663	4.08901e-07	-0.0946631	0.769801
ENSMUSG00000048031	329693	Fcrl5	blue	-0.624366	0.029992	0.918326	2.49236e-05	0.401424	0.195877
ENSMUSG00000073412	16988	Lst1	blue	-0.9614	6.32473e-07	0.992004	2.54032e-10	0.635906	0.0262383
ENSMUSG00000057346	223672	Apol9a	blue	NA	NA	0.914279	3.1521e-05	0.55713	0.0598658
ENSMUSG00000029490	243197	Mfsd7a	blue	-0.760113	0.00411408	0.979045	3.07198e-08	0.0709859	0.826476
ENSMUSG00000031155	18715	Pim2	blue	0.909893	4.0149e-05	0.998534	5.31596e-14	0.626135	0.0293929
ENSMUSG00000073411	14964	H2-D1	blue	-0.631872	0.0275096	0.989435	1.01859e-09	0.283347	0.372154
ENSMUSG00000028270	14469	Gbp2	blue	-0.151158	0.639112	0.972567	1.16867e-07	0.978392	3.57749e-08
ENSMUSG00000023206	16169	Il15ra	blue	-0.947537	2.86528e-06	0.912378	3.50607e-05	0.165983	0.606165
ENSMUSG00000040253	229900	Gbp7	blue	-0.966415	3.18048e-07	0.93537	7.96259e-06	0.609601	0.0353398
ENSMUSG00000091144	628705	Phf11c	blue	-0.825512	0.000942787	0.971897	1.31688e-07	0.464589	0.128089
ENSMUSG00000038058	107607	Nod1	blue	-0.963211	4.98941e-07	0.919157	2.3716e-05	-0.0114959	0.971714
ENSMUSG00000041782	16763	Lad1	blue	0.896348	7.89941e-05	0.998034	2.30515e-13	0.82893	0.000859219
ENSMUSG00000030651	11872	Art2b	blue	0.753966	0.00461659	0.919899	2.26753e-05	0.535608	0.0726947
ENSMUSG00000034855	15945	Cxcl10	blue	0.967861	2.5585e-07	0.951465	1.95467e-06	0.962621	5.39719e-07
ENSMUSG00000036160	20935	Surf6	blue	0.485385	0.109682	0.899269	6.88203e-05	0.280916	0.376448
ENSMUSG00000059639	474145	Clec4a4	blue	-0.945422	3.47877e-06	0.915957	2.86378e-05	0.123542	0.702074
ENSMUSG00000027580	229003	Helz2	blue	-0.440245	0.152061	0.934593	8.44198e-06	0.491714	0.10445
ENSMUSG00000099241	100417829	Gm18852	blue	-0.774597	0.00309405	0.909805	4.03397e-05	0.369925	0.236582
ENSMUSG00000036986	18854	Pml	blue	-0.933893	8.89235e-06	0.93145	1.06172e-05	0.289714	0.361032
ENSMUSG00000018459	114644	Slc13a3	blue	-0.709595	0.00974223	0.986134	3.9436e-09	0.978584	3.42256e-08
ENSMUSG00000046096	233812	Mosmo	blue	-0.203145	0.526578	0.738111	0.00612698	-0.742393	0.00568696
ENSMUSG00000001123	16859	Lgals9	blue	0.487983	0.107514	0.955399	1.28944e-06	0.596402	0.0406684
ENSMUSG00000004591	109333	Pkn2	blue	-0.0754516	0.81572	0.908669	4.28607e-05	0.24679	0.43936
ENSMUSG00000031897	19171	Psmb10	blue	-0.66978	0.0171811	0.979194	2.96517e-08	0.614761	0.0333991
ENSMUSG00000021366	110521	Hivep1	blue	0.440864	0.151419	0.958877	8.64318e-07	0.215037	0.502107
ENSMUSG00000024824	19367	Rad9a	blue	-0.90741	4.5799e-05	0.892656	9.35004e-05	0.119193	0.71216
ENSMUSG00000019990	29863	Pde7b	blue	-0.761836	0.00398104	0.508262	0.091562	-0.861262	0.000319209
ENSMUSG00000091649	236451	Phf11b	blue	-0.448198	0.143937	0.947463	2.88512e-06	0.806719	0.00152026
ENSMUSG00000024170	71718	Telo2	blue	-0.91006	3.97903e-05	0.928736	1.28322e-05	0.0701489	0.828496
ENSMUSG00000020415	30939	Pttg1	blue	-0.317411	0.314736	0.941404	4.92837e-06	0.368666	0.238306
ENSMUSG00000098540	102465641	Mir7059	blue	-0.60615	0.0366816	0.233182	0.465772	-0.782756	0.00261164
ENSMUSG00000055447	16423	Cd47	blue	-0.779433	0.00280063	0.950582	2.13578e-06	0.344701	0.272526
ENSMUSG00000030697	56420	Ppp4c	blue	0.325444	0.301955	0.966491	3.14505e-07	0.347645	0.268178
ENSMUSG00000098934	100417831	Gm18853	blue	-0.716523	0.00874671	0.913451	3.30261e-05	0.477866	0.116121
ENSMUSG00000040888	11692	Gfer	blue	-0.228864	0.474306	0.787929	0.00233696	0.187176	0.560221
ENSMUSG00000019738	69920	Polr2i	blue	0.577245	0.0493832	0.851352	0.000442899	0.263521	0.407907
ENSMUSG00000030036	57377	Mogs	blue	-0.717227	0.00864996	0.971341	1.45101e-07	0.109529	0.734721
ENSMUSG00000047735	209086	Samd9l	blue	-0.115246	0.721349	0.974534	8.08178e-08	0.876654	0.000182156
ENSMUSG00000090881	628693	Phf11-ps	blue	-0.8494	0.000471127	0.952283	1.79794e-06	0.599879	0.0392127
ENSMUSG00000008193	272382	Spib	blue	NA	NA	0.886573	0.000121872	0.864866	0.000281618
ENSMUSG00000026425	14270	Srgap2	blue	-0.947753	2.80777e-06	0.968209	2.42455e-07	0.129653	0.687976
ENSMUSG00000069515	17110	Lyz1	blue	0.183108	0.568929	0.795566	0.00197245	0.199154	0.534904
ENSMUSG00000075010	107350	AW112010	blue	0.923861	1.77157e-05	0.987296	2.55137e-09	0.974134	8.73077e-08
ENSMUSG00000031327	12212	Chic1	blue	0.214173	0.503867	0.955282	1.30625e-06	0.267861	0.399939
ENSMUSG00000038046	67390	Mrm3	blue	0.634735	0.0266028	0.978536	3.46122e-08	0.276142	0.384953
ENSMUSG00000028796	54383	Phc2	blue	-0.125281	0.698053	0.843938	0.000557572	0.315516	0.317794
ENSMUSG00000056290	60361	Ms4a4b	blue	-0.85486	0.000395484	0.33079	0.293614	-0.911792	3.62121e-05
ENSMUSG00000007987	67286	Ift22	blue	0.0892224	0.782743	0.927158	1.42792e-05	0.223346	0.485313
ENSMUSG00000019866	11630	Crybg1	blue	-0.758008	0.00428124	0.961061	6.60396e-07	0.303188	0.338081
ENSMUSG00000036636	26373	Clcn7	blue	0.64136	0.0245882	0.993932	6.41475e-11	0.885297	0.000128597
ENSMUSG00000029319	71883	Coq2	blue	-0.393603	0.205551	0.951719	1.9048e-06	0.418473	0.175777
ENSMUSG00000028419	76959	Chmp5	blue	0.559206	0.0587181	0.985052	5.73292e-09	0.516027	0.0859022
ENSMUSG00000090000	66191	Ier3ip1	blue	-0.00764635	0.981184	0.952198	1.81364e-06	0.393639	0.205505
ENSMUSG00000020107	52717	Anapc16	blue	-0.130419	0.686215	0.905624	5.02329e-05	0.241232	0.450059
ENSMUSG00000022216	19186	Psme1	blue	0.640129	0.0249539	0.987132	2.71979e-09	0.59816	0.0399278
ENSMUSG00000057530	230857	Ece1	blue	0.226697	0.478615	0.931814	1.03451e-05	0.269406	0.39712
ENSMUSG00000034731	380921	Dgkh	blue	-0.869274	0.000240439	0.922121	1.97755e-05	0.239888	0.452664
ENSMUSG00000044477	21769	Zfand3	blue	0.316129	0.316802	0.906265	4.8604e-05	0.314684	0.31914
ENSMUSG00000027959	72776	Sass6	blue	-0.8263	0.000922997	0.868477	0.000247515	0.32159	0.30805
ENSMUSG00000026088	69028	Mitd1	blue	-0.881886	0.000148007	0.952539	1.75084e-06	0.659892	0.0195406
ENSMUSG00000026829	227671	Gbgt1	blue	0.481065	0.113352	0.944915	3.6402e-06	0.496493	0.100611
ENSMUSG00000038774	77987	Ascc3	blue	-0.910051	3.98097e-05	0.926102	1.53166e-05	0.332915	0.290334
ENSMUSG00000000204	20558	Slfn4	blue	0.482311	0.112285	0.919585	2.31112e-05	0.921776	2.02054e-05
ENSMUSG00000028773	14077	Fabp3	blue	0.957532	1.01296e-06	0.987445	2.40517e-09	0.926245	1.51724e-05
ENSMUSG00000056692	224647	Ilrun	blue	0.966936	2.94409e-07	0.97555	6.60422e-08	0.84075	0.000613412
ENSMUSG00000022586	57248	Ly6i	blue	0.384113	0.217673	0.971012	1.53557e-07	0.856424	0.000375664
ENSMUSG00000085184	71319	4933439K11Rik	blue	-0.483308	0.111436	0.943673	4.06074e-06	0.183084	0.56898
ENSMUSG00000078153	621823	Psme2b	blue	-0.983564	9.18969e-09	0.991745	2.97678e-10	0.647794	0.0227395
ENSMUSG00000037148	78514	Arhgap10	blue	-0.818051	0.00114695	0.947643	2.837e-06	0.480075	0.114205
ENSMUSG00000033538	12363	Casp4	blue	0.921931	2.0012e-05	0.988168	1.79075e-09	0.891802	9.71338e-05
ENSMUSG00000053390	240067	Zfp952	blue	-0.772236	0.00324558	0.193008	0.547834	-0.811294	0.00135976
ENSMUSG00000024983	53611	Vti1a	blue	0.754472	0.00457354	0.961819	5.99313e-07	0.571481	0.0522435
ENSMUSG00000036199	67184	Ndufa13	blue	-0.0205587	0.949435	0.977305	4.56488e-08	0.230496	0.471072
ENSMUSG00000017652	21939	Cd40	blue	0.992851	1.45342e-10	0.972398	1.20462e-07	0.99499	2.46563e-11
ENSMUSG00000039682	66988	Lap3	blue	0.108411	0.737344	0.928728	1.28392e-05	0.344899	0.272232
ENSMUSG00000006342	71733	Susd2	blue	0.884575	0.000132529	0.955833	1.22884e-06	0.802862	0.00166652
ENSMUSG00000031639	142980	Tlr3	blue	-0.796436	0.0019339	0.973775	9.34825e-08	0.729451	0.00709459
ENSMUSG00000023078	55985	Cxcl13	blue	0.834709	0.000731055	0.974687	7.84427e-08	0.83236	0.000781225
ENSMUSG00000071350	239122	Setdb2	blue	0.927769	1.37039e-05	0.98387	8.36968e-09	0.928948	1.2647e-05
ENSMUSG00000102037	12044	Bcl2a1a	blue	0.989579	9.51111e-10	0.964969	3.91739e-07	0.905706	5.00239e-05
ENSMUSG00000027646	20779	Src	blue	0.968321	2.3826e-07	0.984049	7.91679e-09	0.798841	0.00183023
ENSMUSG00000088015	100316690	Mir1932	blue	-0.36969	0.236903	0.846638	0.000513424	0.40868	0.187158
ENSMUSG00000097534	100503498	Gm16675	blue	0.197974	0.537377	0.983651	8.94956e-09	0.313387	0.321248
ENSMUSG00000060938	19941	Rpl26	blue	-0.453555	0.138626	0.883824	0.00013672	0.185238	0.564363
ENSMUSG00000068329	64704	Htra2	blue	0.582077	0.047072	0.940346	5.37982e-06	0.400925	0.196485
ENSMUSG00000031792	101985	Usb1	blue	0.943073	4.27736e-06	0.977561	4.31436e-08	0.86914	0.000241623
ENSMUSG00000044703	219131	Phf11a	blue	0.0107133	0.973639	0.934125	8.74091e-06	0.835523	0.000714264
ENSMUSG00000026942	22030	Traf2	blue	0.935586	7.83331e-06	0.98883	1.34383e-09	0.831414	0.000802159
ENSMUSG00000020211	20222	Sf3a2	blue	-0.369447	0.237235	0.864353	0.000286753	0.196793	0.539857
ENSMUSG00000020477	64660	Mrps24	blue	-0.216748	0.498628	0.933384	9.23223e-06	0.274099	0.388622
ENSMUSG00000034118	22021	Tpst1	blue	-0.898081	7.28257e-05	0.955767	1.23789e-06	0.827469	0.0008942
ENSMUSG00000037216	623661	Lipt1	blue	-0.0903038	0.780167	0.781817	0.002664	0.303819	0.337026
ENSMUSG00000031779	20299	Ccl22	blue	0.875139	0.000193107	0.968583	2.28646e-07	0.762572	0.00392519
ENSMUSG00000015568	16956	Lpl	blue	-0.983095	1.05684e-08	0.9939	6.58464e-11	0.7406	0.00586823
ENSMUSG00000000247	16870	Lhx2	blue	-0.500816	0.097221	0.923786	1.78008e-05	0.475426	0.118263
ENSMUSG00000031778	20312	Cx3cl1	blue	0.125817	0.696816	0.983734	8.72605e-09	0.494918	0.101866
ENSMUSG00000031839	68196	Hsbp1	blue	-0.730702	0.00694817	0.952276	1.7991e-06	0.216495	0.499142
ENSMUSG00000058715	14127	Fcer1g	blue	-0.416237	0.178337	0.992131	2.34504e-10	0.56001	0.0582779
ENSMUSG00000038037	12703	Socs1	blue	-0.313812	0.320557	0.906611	4.77424e-05	0.966769	3.01846e-07
ENSMUSG00000030990	233575	Pgap2	blue	0.634431	0.0266981	0.993212	1.1223e-10	0.928098	1.34023e-05
ENSMUSG00000055202	240063	Zfp811	blue	0.0359946	0.911572	0.990971	4.6545e-10	0.770365	0.00336955
ENSMUSG00000030905	12971	Crym	blue	-0.768406	0.00350323	0.974191	8.63559e-08	0.271281	0.393714
ENSMUSG00000020078	30930	Vps26a	blue	-0.612307	0.0343122	0.95389	1.51897e-06	0.224023	0.483957
ENSMUSG00000028788	19244	Ptp4a2	blue	0.312586	0.322553	0.931603	1.05021e-05	0.434358	0.15826
ENSMUSG00000021816	19056	Ppp3cb	blue	0.221154	0.489718	0.930092	1.16841e-05	0.379078	0.224275
ENSMUSG00000026946	64685	Nmi	blue	0.211778	0.508763	0.963159	5.02376e-07	0.915741	2.89961e-05
ENSMUSG00000028907	67205	Utp11	blue	0.320288	0.310125	0.994932	2.6106e-11	0.718694	0.00845104
ENSMUSG00000042742	101148	Bmt2	blue	-0.754341	0.0045847	0.989066	1.2082e-09	0.536212	0.0723112
ENSMUSG00000031758	75796	Cdyl2	blue	-0.616889	0.0326215	0.92151	2.05427e-05	0.216219	0.499702
ENSMUSG00000039158	100182	Akna	blue	0.876225	0.000185208	0.96079	6.83344e-07	0.675453	0.0159258
ENSMUSG00000021065	53618	Fut8	blue	-0.83525	0.000719847	0.954647	1.40013e-06	0.265178	0.404856
ENSMUSG00000025538	67902	Sumf2	blue	-0.452103	0.140053	0.918057	2.5325e-05	0.501674	0.0965568
ENSMUSG00000043832	73149	Clec4a3	blue	-0.992852	1.45245e-10	0.995802	1.01924e-11	0.64976	0.0221956
ENSMUSG00000028232	72098	Tmem68	blue	-0.942701	4.4163e-06	0.989987	7.79566e-10	0.816985	0.00117871
ENSMUSG00000086860	382255	Gm1720	blue	-0.447214	0.144928	0.884073	0.000135319	0.454739	0.137469
ENSMUSG00000036890	227835	Gtdc1	blue	0.447187	0.144954	0.953638	1.56029e-06	0.460262	0.132157
ENSMUSG00000019082	68267	Slc25a22	blue	-0.251778	0.429863	0.956074	1.19611e-06	0.964052	4.45094e-07
ENSMUSG00000032065	66654	Tex12	blue	-0.398717	0.199193	0.888474	0.000112371	0.281929	0.374656
ENSMUSG00000050043	66958	Tmx2	blue	-0.773027	0.00319418	0.98234	1.3135e-08	0.584459	0.0459612
ENSMUSG00000003617	12870	Cp	blue	-0.88534	0.000128367	0.986695	3.21067e-09	0.861684	0.000314617
ENSMUSG00000042719	231713	Naa25	blue	-0.632642	0.0272635	0.978054	3.86468e-08	0.736451	0.00630432
ENSMUSG00000027347	19419	Rasgrp1	blue	0.876471	0.00018345	0.931072	1.09058e-05	0.96901	2.13708e-07
ENSMUSG00000057135	327957	Scimp	blue	0.88938	0.00010805	0.955435	1.28436e-06	0.835411	0.000716548
ENSMUSG00000002108	22259	Nr1h3	blue	0.167585	0.602641	0.998887	1.33962e-14	0.914693	3.07888e-05
ENSMUSG00000022160	56335	Mettl3	blue	-0.678841	0.015209	0.887289	0.000118223	0.332049	0.291668
ENSMUSG00000033581	319765	Igf2bp2	blue	-0.0954301	0.767981	0.992056	2.45902e-10	0.905227	5.12632e-05
ENSMUSG00000033088	110253	Triobp	blue	-0.99376	7.37197e-11	0.930418	1.14206e-05	0.828923	0.000859384
ENSMUSG00000047719	71707	Ubiad1	blue	-0.567611	0.0542281	0.877313	0.000177543	0.859729	0.000336323
ENSMUSG00000031660	26992	Brd7	blue	-0.643761	0.023886	0.8632	0.000298537	0.20881	0.514858
ENSMUSG00000050549	70617	Fam241a	blue	0.983205	1.02312e-08	0.993376	9.92998e-11	0.92066	2.16474e-05
ENSMUSG00000015461	12915	Atf6b	blue	0.8936	8.96084e-05	0.964441	4.21761e-07	0.899572	6.78281e-05
ENSMUSG00000050578	17386	Mmp13	blue	0.95949	8.0263e-07	0.982132	1.3919e-08	0.96049	7.09505e-07
ENSMUSG00000090231	14962	Cfb	blue	0.977238	4.63234e-08	0.990977	4.64064e-10	0.947344	2.91724e-06
ENSMUSG00000022867	30940	Usp25	blue	-0.248981	0.435175	0.968507	2.31407e-07	0.87821	0.000171417
ENSMUSG00000003402	19089	Prkcsh	blue	-0.485994	0.109172	0.837288	0.000678872	0.548201	0.0649802
ENSMUSG00000032508	17874	Myd88	blue	0.9763	5.6588e-08	0.961319	6.39073e-07	0.921784	2.01952e-05
ENSMUSG00000069793	237886	Slfn9	blue	-0.868383	0.000248362	0.89263	9.36106e-05	0.778187	0.00287411
ENSMUSG00000045629	225608	Sh3tc2	blue	0.447214	0.144928	0.848554	0.000483774	0.447214	0.144928
ENSMUSG00000026822	16819	Lcn2	blue	0.783201	0.00258707	0.981765	1.54011e-08	0.946472	3.16225e-06
ENSMUSG00000026640	18845	Plxna2	blue	-0.85322	0.000417137	0.918952	2.40087e-05	0.528521	0.077302
ENSMUSG00000027366	66552	Sppl2a	blue	0.756629	0.00439351	0.995452	1.52066e-11	0.925333	1.61093e-05
ENSMUSG00000033216	65967	Eefsec	blue	0.332659	0.290729	0.964431	4.22381e-07	0.416267	0.178303
ENSMUSG00000052296	243819	Ppp6r1	blue	0.437987	0.15442	0.962019	5.83994e-07	0.742285	0.00569775
ENSMUSG00000063286	668139	Gm8995	blue	-0.823801	0.0009869	0.935982	7.60043e-06	0.716519	0.00874732
ENSMUSG00000038866	227449	Zcchc2	blue	-0.908566	4.3095e-05	0.975023	7.34083e-08	0.836382	0.000696867
ENSMUSG00000024312	57315	Wdr46	blue	0.54963	0.0641417	0.911536	3.67235e-05	0.676693	0.0156607
ENSMUSG00000044827	21897	Tlr1	blue	0.633066	0.0271287	0.997652	5.59534e-13	0.940073	5.50151e-06
ENSMUSG00000025533	109900	Asl	blue	0.236555	0.459158	0.897801	7.37961e-05	0.385729	0.215579
ENSMUSG00000030662	70572	Ipo5	blue	0.363861	0.244952	0.981863	1.49948e-08	0.682164	0.0145295
ENSMUSG00000067577	403202	A430093F15Rik	blue	0.702628	0.0108261	0.899927	6.66782e-05	0.814871	0.00124364
ENSMUSG00000050029	72065	Rap2c	blue	0.84667	0.00051292	0.967059	2.89011e-07	0.78581	0.00244665
ENSMUSG00000024610	16149	Cd74	blue	0.73597	0.00635635	0.986259	3.7699e-09	0.72063	0.00819366
ENSMUSG00000018567	56486	Gabarap	blue	0.555476	0.0607912	0.980936	1.92097e-08	0.478845	0.115269
ENSMUSG00000021200	65256	Asb2	blue	-0.914662	3.08435e-05	0.915413	2.95479e-05	0.70816	0.00995845
ENSMUSG00000071311	436440	Gpr31b	blue	0.930653	1.12335e-05	0.976079	5.92642e-08	0.917534	2.61201e-05
ENSMUSG00000014301	66449	Pam16	blue	0.397329	0.200906	0.910758	3.83161e-05	0.541583	0.0689601
ENSMUSG00000039163	67899	Cmc1	blue	0.357091	0.254499	0.957654	9.98675e-07	0.638267	0.0255144
ENSMUSG00000022538	224092	Lsg1	blue	0.356531	0.255298	0.917718	2.58392e-05	0.448743	0.143391
ENSMUSG00000052469	100041352	Tcp10c	blue	0.469687	0.123402	0.963707	4.66552e-07	0.662772	0.0188303
ENSMUSG00000020476	13169	Dbnl	blue	0.939583	5.72547e-06	0.96864	2.26635e-07	0.974043	8.88465e-08
ENSMUSG00000008496	18987	Pou2f2	blue	-0.908733	4.27145e-05	0.958369	9.18291e-07	0.513402	0.0877884
ENSMUSG00000027962	22329	Vcam1	blue	0.782145	0.0026456	0.892768	9.30327e-05	0.880002	0.000159671
ENSMUSG00000047454	268566	Gphn	blue	0.321295	0.308519	0.998742	2.48025e-14	0.892608	9.37006e-05
ENSMUSG00000001348	11433	Acp5	blue	0.827378	0.000896425	0.990077	7.45346e-10	0.866164	0.000268969
ENSMUSG00000029227	66899	Fip1l1	blue	0.329984	0.294863	0.930914	1.1029e-05	0.600604	0.0389141
ENSMUSG00000000320	11684	Alox12	blue	0.0775002	0.810796	0.811074	0.00136719	0.84173	0.000595816
ENSMUSG00000038615	18023	Nfe2l1	blue	0.982082	1.41145e-08	0.991359	3.73859e-10	0.971824	1.33403e-07
ENSMUSG00000039285	27215	Azi2	blue	0.795087	0.00199398	0.979899	2.49906e-08	0.915043	3.01811e-05
ENSMUSG00000026615	107508	Eprs	blue	0.917978	2.54445e-05	0.995389	1.62806e-11	0.982386	1.29648e-08
ENSMUSG00000026426	68724	Arl8a	blue	0.421652	0.172179	0.94324	4.21611e-06	0.466826	0.126019
ENSMUSG00000029409	57425	U90926	blue	NA	NA	0.749075	0.00504848	0.642059	0.0243823
ENSMUSG00000025324	11982	Atp10a	blue	-0.214636	0.502924	0.904655	5.27764e-05	0.785272	0.00247515
ENSMUSG00000020826	18126	Nos2	blue	0.447214	0.144928	0.99696	2.03546e-12	0.733995	0.00657365
ENSMUSG00000060519	30935	Tor3a	blue	0.152081	0.637041	0.974859	7.5832e-08	0.952131	1.82631e-06
ENSMUSG00000032344	214763	Cgas	blue	0.74266	0.00566035	0.975424	6.77481e-08	0.910671	3.84975e-05
ENSMUSG00000005667	17768	Mthfd2	blue	0.996762	2.78813e-12	0.98969	9.01529e-10	0.996877	2.32862e-12
ENSMUSG00000017561	54394	Crlf3	blue	-0.512947	0.0881184	0.98852	1.54071e-09	0.716943	0.00868891
ENSMUSG00000039263	228961	Npepl1	blue	0.360481	0.249692	0.936688	7.19945e-06	0.648964	0.0224147
ENSMUSG00000005823	78308	Gpr108	blue	0.590041	0.0434302	0.978165	3.76856e-08	0.637836	0.0256454
ENSMUSG00000016283	14990	H2-M2	blue	0.988894	1.30613e-09	0.994691	3.29075e-11	0.988197	1.76839e-09
ENSMUSG00000027422	81910	Rrbp1	blue	0.557056	0.0599071	0.937507	6.7552e-06	0.727814	0.00728964
ENSMUSG00000060538	68742	Tmem219	blue	0.684515	0.0140624	0.931637	1.04766e-05	0.895747	8.12272e-05
ENSMUSG00000036398	76497	Ppp1r11	blue	0.212852	0.506564	0.990582	5.7439e-10	0.439316	0.15303
ENSMUSG00000050350	110168	Gpr18	blue	0.924849	1.66236e-05	0.999631	5.39917e-17	0.902534	5.86993e-05
ENSMUSG00000004730	13733	Adgre1	blue	-0.768133	0.00352214	0.999421	5.13374e-16	0.992768	1.53871e-10
ENSMUSG00000014850	17686	Msh3	blue	0.158268	0.62323	0.821806	0.00104035	0.508689	0.0912447
ENSMUSG00000055602	21462	Tcp10b	blue	0.865787	0.000272599	0.908613	4.29893e-05	0.82707	0.000903957
ENSMUSG00000024397	11629	Aif1	blue	0.843288	0.000568627	0.993615	8.26973e-11	0.972763	1.12789e-07
ENSMUSG00000020464	71701	Pnpt1	blue	-0.049807	0.877833	0.979276	2.90773e-08	0.907957	4.45023e-05
ENSMUSG00000011114	21376	Tbrg1	blue	-0.732689	0.00672029	0.897287	7.56022e-05	0.452018	0.140137
ENSMUSG00000047344	236285	Lancl3	blue	-0.222376	0.487261	0.93576	7.73054e-06	0.466855	0.125992
ENSMUSG00000025888	12362	Casp1	blue	-0.89395	8.81958e-05	0.989174	1.15028e-09	0.874984	0.000194253
ENSMUSG00000067722	214489	BC003965	blue	-0.0723058	0.823294	0.86266	0.000304192	0.576185	0.0499011
ENSMUSG00000034266	53314	Batf	blue	-0.533098	0.0743043	0.988212	1.75784e-09	0.955306	1.30281e-06
ENSMUSG00000066150	20529	Slc31a1	blue	0.590017	0.0434409	0.998793	2.00934e-14	0.880471	0.000156705
ENSMUSG00000031311	53610	Nono	blue	-0.539177	0.0704474	0.82923	0.000852172	0.589019	0.0438858
ENSMUSG00000036180	234366	Gatad2a	blue	0.721616	0.00806492	0.988018	1.90604e-09	0.921841	2.01246e-05
ENSMUSG00000027215	12521	Cd82	blue	-0.900417	6.51171e-05	0.998927	1.11771e-14	0.926147	1.52707e-05
ENSMUSG00000079197	19188	Psme2	blue	0.947217	2.95203e-06	0.992866	1.43826e-10	0.988514	1.5446e-09
ENSMUSG00000028337	107684	Coro2a	blue	-0.972729	1.13468e-07	0.955796	1.23391e-06	0.925813	1.56107e-05
ENSMUSG00000021457	20963	Syk	blue	-0.880452	0.000156825	0.995309	1.77494e-11	0.98847	1.57391e-09
ENSMUSG00000027944	23897	Hax1	blue	0.9497	2.32985e-06	0.99453	3.82188e-11	0.928652	1.29066e-05
ENSMUSG00000025790	108116	Slco3a1	blue	-0.766773	0.00361762	0.957299	1.04064e-06	0.970771	1.59983e-07
ENSMUSG00000024164	12266	C3	blue	0.787721	0.00234759	0.987159	2.69059e-09	0.997848	3.62074e-13
ENSMUSG00000029780	107569	Nt5c3	blue	0.558517	0.0590971	0.95793	9.66974e-07	0.906642	4.76647e-05
ENSMUSG00000026141	12823	Col19a1	blue	0.710177	0.00965541	0.910364	3.91424e-05	0.701456	0.0110168
ENSMUSG00000022255	67154	Mtdh	blue	0.849607	0.000468071	0.985265	5.33636e-09	0.857483	0.000362692
ENSMUSG00000024732	108673	Ccdc86	blue	0.958396	9.15264e-07	0.960984	6.66853e-07	0.978577	3.42816e-08
ENSMUSG00000012519	74568	Mlkl	blue	0.540776	0.0694565	0.978684	3.34439e-08	0.991193	4.11211e-10
ENSMUSG00000102697	353237	Pcdhac2	blue	-0.00917613	0.977421	0.878286	0.000170906	0.797723	0.00187789
ENSMUSG00000020903	55943	Stx8	blue	0.15405	0.632635	0.940042	5.51535e-06	0.509095	0.0909433
ENSMUSG00000053318	74748	Slamf8	blue	0.760659	0.0040716	0.988982	1.25549e-09	0.985192	5.46969e-09
ENSMUSG00000026399	13136	Cd55	blue	0.0958991	0.766868	0.945661	3.40463e-06	0.945466	3.46502e-06
ENSMUSG00000029366	13178	Dck	blue	-0.678062	0.0153718	0.955351	1.2963e-06	0.927049	1.43832e-05
ENSMUSG00000035373	20306	Ccl7	blue	0.959294	8.21911e-07	0.929264	1.23756e-05	0.998234	1.34712e-13
ENSMUSG00000018930	20303	Ccl4	blue	0.994787	3.00483e-11	0.978111	3.81465e-08	0.977524	4.35007e-08
ENSMUSG00000023367	66058	Tmem176a	blue	-0.90074	6.41051e-05	0.999669	3.12615e-17	0.994784	3.01422e-11
ENSMUSG00000015733	12343	Capza2	blue	0.845581	0.000530368	0.990306	6.63369e-10	0.951751	1.89863e-06
ENSMUSG00000013846	20442	St3gal1	blue	0.43841	0.153977	0.990877	4.90129e-10	0.93396	8.84843e-06
ENSMUSG00000074656	67204	Eif2s2	blue	0.678496	0.0152809	0.988465	1.57756e-09	0.900178	6.58756e-05
ENSMUSG00000040850	103554	Psme4	blue	0.275652	0.385831	0.90827	4.37742e-05	0.808372	0.00146068
ENSMUSG00000037752	381560	Xkr8	blue	-0.0606032	0.851587	0.983245	1.01102e-08	0.725584	0.00756177
ENSMUSG00000031862	170759	Atp13a1	blue	0.716529	0.00874583	0.979714	2.61483e-08	0.91714	2.67328e-05
ENSMUSG00000055239	74287	Kcmf1	blue	0.964956	3.92431e-07	0.987971	1.94415e-09	0.939513	5.75801e-06
ENSMUSG00000016498	58205	Pdcd1lg2	blue	0.319953	0.31066	0.911043	3.7726e-05	0.641974	0.024407
ENSMUSG00000039195	73737	1110008P14Rik	blue	0.412491	0.182676	0.984628	6.58687e-09	0.855055	0.000392967
ENSMUSG00000002980	57278	Bcam	blue	0.873117	0.000208519	0.977588	4.28919e-08	0.847967	0.000492712
ENSMUSG00000010936	234729	Vac14	blue	0.841548	0.000599048	0.947249	2.94324e-06	0.751071	0.00486873
ENSMUSG00000025492	66141	Ifitm3	blue	-0.0561863	0.862309	0.949519	2.37143e-06	0.860309	0.000329761
ENSMUSG00000050732	22320	Vamp8	blue	0.46544	0.127298	0.986674	3.237e-09	0.915768	2.89513e-05
ENSMUSG00000003308	50868	Keap1	blue	-0.217008	0.498099	0.986116	3.96943e-09	0.988648	1.45679e-09
ENSMUSG00000094724	68195	Rnaset2b	blue	0.807801	0.00148106	0.991891	2.72359e-10	0.952266	1.80094e-06
ENSMUSG00000049037	269799	Clec4a1	blue	-0.960669	6.93841e-07	0.997794	4.10046e-13	0.995375	1.65327e-11
ENSMUSG00000039697	211329	Ncoa7	blue	0.0224037	0.944903	0.955416	1.28711e-06	0.799092	0.00181967
ENSMUSG00000053819	108058	Camk2d	blue	0.942972	4.3148e-06	0.990865	4.93242e-10	0.968846	2.19361e-07
ENSMUSG00000029275	14581	Gfi1	blue	0.685158	0.0139366	0.847295	0.00050311	0.949424	2.39331e-06
ENSMUSG00000075701	109815	Selenos	blue	0.907919	4.45918e-05	0.992071	2.43523e-10	0.901852	6.07088e-05
ENSMUSG00000024601	66307	Isoc1	blue	-0.60426	0.0374318	0.979928	2.48119e-08	0.930607	1.12704e-05
ENSMUSG00000020671	19325	Rab10	blue	0.95149	1.94963e-06	0.997868	3.45922e-13	0.975669	6.44722e-08
ENSMUSG00000026112	76178	Coa5	blue	-0.133861	0.678321	0.987898	2.00358e-09	0.950453	2.16329e-06
ENSMUSG00000040026	20210	Saa3	blue	0.99537	1.66187e-11	0.996557	3.78583e-12	0.983609	9.06538e-09
ENSMUSG00000039678	70296	Tbc1d13	blue	0.578697	0.0486806	0.989288	1.09085e-09	0.913112	3.3658e-05
ENSMUSG00000025915	170755	Sgk3	blue	0.869484	0.000238609	0.992019	2.51545e-10	0.973783	9.33514e-08
ENSMUSG00000095687	100037283	Rnaset2a	blue	0.824757	0.000962061	0.991211	4.06879e-10	0.967815	2.57687e-07
ENSMUSG00000068417	667034	Pnp2	blue	0.856841	0.00037052	0.956511	1.13874e-06	0.968459	2.33171e-07
ENSMUSG00000038357	12796	Camp	blue	0.590273	0.0433275	0.838531	0.000654782	0.8113	0.00135958
ENSMUSG00000029810	65963	Tmem176b	blue	-0.971645	1.37654e-07	0.999498	2.49755e-16	0.988642	1.46086e-09
ENSMUSG00000030148	26888	Clec4a2	blue	-0.939815	5.61869e-06	0.993181	1.14823e-10	0.991981	2.57635e-10
ENSMUSG00000030401	20167	Rtn2	blue	-0.416953	0.177515	0.971883	1.32015e-07	0.961973	5.87507e-07
ENSMUSG00000037347	60322	Chst7	blue	-0.788416	0.00231231	0.961201	6.48684e-07	0.973653	9.56663e-08
ENSMUSG00000095567	57741	Noc2l	blue	0.910997	3.78222e-05	0.996424	4.57694e-12	0.969167	2.0838e-07
ENSMUSG00000007036	193742	Abhd16a	blue	0.811643	0.00134809	0.894224	8.71057e-05	0.942388	4.53559e-06
ENSMUSG00000066152	20530	Slc31a2	blue	0.964122	4.40815e-07	0.996387	4.82074e-12	0.991581	3.28387e-10
ENSMUSG00000020901	320207	Pik3r5	blue	0.987404	2.44511e-09	0.997776	4.26637e-13	0.994534	3.80829e-11
ENSMUSG00000037331	73158	Larp1	blue	0.458939	0.133417	0.960914	6.72791e-07	0.969447	1.99185e-07
ENSMUSG00000035505	231430	Cox18	blue	0.781927	0.00265783	0.970867	1.5739e-07	0.958979	8.53824e-07
ENSMUSG00000029330	74596	Cds1	blue	0.639695	0.0250838	0.970172	1.76861e-07	0.984377	7.14118e-09
ENSMUSG00000002103	11432	Acp2	blue	0.912051	3.56992e-05	0.999642	4.64762e-17	0.995003	2.43296e-11
ENSMUSG00000042901	108909	Aida	blue	0.452629	0.139535	0.979678	2.63845e-08	0.976271	5.69376e-08
ENSMUSG00000028811	107271	Yars	blue	0.686051	0.0137632	0.996606	3.52896e-12	0.959267	8.24639e-07
ENSMUSG00000003206	50498	Ebi3	blue	-0.06089	0.850892	0.991515	3.41383e-10	0.98591	4.27198e-09
ENSMUSG00000026341	74117	Actr3	blue	0.957654	9.98694e-07	0.986537	3.40552e-09	0.986223	3.82024e-09
ENSMUSG00000018796	14081	Acsl1	blue	0.923684	1.79178e-05	0.989808	8.51276e-10	0.991355	3.74884e-10
ENSMUSG00000023030	18174	Slc11a2	blue	0.993703	7.71512e-11	0.999412	5.5109e-16	0.999545	1.53283e-16
ENSMUSG00000021451	20354	Sema4d	blue	0.858375	0.000352035	0.99703	1.80951e-12	0.976752	5.14381e-08
ENSMUSG00000040699	67803	Limd2	blue	0.592099	0.0425226	0.991091	4.35357e-10	0.986044	4.07356e-09
ENSMUSG00000030474	83382	Siglece	blue	0.852658	0.000424762	0.995627	1.2508e-11	0.99942	5.17092e-16
ENSMUSG00000038803	67695	Ost4	brown	0.207774	0.516993	0.540343	0.0697243	0.395979	0.202581
ENSMUSG00000031601	18983	Cnot7	brown	-0.00976277	0.975977	0.464868	0.12783	0.549008	0.0645059
ENSMUSG00000004931	57267	Apba3	brown	0.254875	0.424016	0.601168	0.0386829	0.558014	0.0593751
ENSMUSG00000038965	22195	Ube2l3	brown	0.164414	0.60962	0.842793	0.00057716	0.513648	0.0876107
ENSMUSG00000051650	53625	B3gnt2	brown	0.0350809	0.91381	0.535282	0.0729026	0.457921	0.134392
ENSMUSG00000034171	14073	Faah	brown	0.388337	0.212225	0.665575	0.0181575	0.677049	0.0155851
ENSMUSG00000076439	17441	Mog	brown	-0.0315846	0.922376	0.565578	0.0552911	0.549426	0.064261
ENSMUSG00000031976	382038	Urb2	brown	0.422805	0.170886	0.694319	0.0122329	0.495204	0.101637
ENSMUSG00000046818	73284	Ddit4l	brown	-0.278397	0.380923	0.334851	0.287365	0.522436	0.0814136
ENSMUSG00000027206	12848	Cops2	brown	0.361826	0.247799	0.719787	0.00830492	0.513081	0.0880215
ENSMUSG00000020566	68775	Atp6v1c2	brown	-0.120661	0.70875	0.45396	0.138229	0.68256	0.0144499
ENSMUSG00000044667	229791	Plppr4	brown	-0.0969041	0.764486	0.349552	0.265382	0.656933	0.0202904
ENSMUSG00000055745	223732	Rtl6	brown	0.422637	0.171073	0.651053	0.0218429	0.552134	0.0626913
ENSMUSG00000063594	14709	Gng8	brown	-0.0149366	0.963253	0.497827	0.0995562	0.705431	0.0103798
ENSMUSG00000079092	18811	Prl2c2	brown	-0.0185109	0.954467	0.771968	0.0032631	0.494951	0.101839
ENSMUSG00000059901	237360	Adamts14	brown	0.0397472	0.90239	0.619929	0.0315334	0.623078	0.0304337
ENSMUSG00000067919	100043034	Rex2	brown	-0.103145	0.749733	0.679642	0.0150432	0.513692	0.0875788
ENSMUSG00000030722	18020	Nfatc2ip	brown	0.311537	0.324266	0.840381	0.000620152	0.676099	0.0157871
ENSMUSG00000090258	211151	Churc1	brown	-0.160173	0.619	0.424684	0.16879	0.555303	0.0608888
ENSMUSG00000062997	66489	Rpl35	brown	-0.0381497	0.906298	0.704555	0.0105177	0.493655	0.102879
ENSMUSG00000050423	76487	Ppp1r3g	brown	0.707077	0.0101242	0.674851	0.0160557	0.78693	0.00238821
ENSMUSG00000082260	664969	Gm7429	brown	0.454087	0.138106	0.695567	0.0120136	0.709095	0.00981715
ENSMUSG00000050961	278676	AY358078	brown	0.164057	0.610407	0.798238	0.00185584	0.91086	3.81038e-05
ENSMUSG00000027233	67578	Patl2	brown	0.0603391	0.852228	0.679123	0.0151504	0.650275	0.0220547
ENSMUSG00000013418	14422	B4galnt2	brown	-0.507587	0.0920655	0.574117	0.0509218	0.55213	0.0626938
ENSMUSG00000031994	30806	Adamts8	brown	-0.13806	0.66873	0.532751	0.0745289	0.638534	0.0254335
ENSMUSG00000070661	66825	Rnf186	brown	0.406012	0.190335	0.829812	0.000838611	0.610409	0.0350307
ENSMUSG00000038086	69253	Hspb2	brown	0.41619	0.178391	0.635355	0.0264095	0.602175	0.038272
ENSMUSG00000059301	432649	Gm5434	brown	0.612216	0.0343464	0.844746	0.000544066	0.567077	0.0545059
ENSMUSG00000023243	16529	Kcnk5	brown	-0.152779	0.635478	0.529285	0.076796	0.831069	0.000809915
ENSMUSG00000024076	74199	Vit	brown	-0.447214	0.144928	0.563055	0.0566311	0.634562	0.0266571
ENSMUSG00000060636	57808	Rpl35a	brown	0.000186377	0.999541	0.974892	7.5341e-08	0.580757	0.0476957
ENSMUSG00000075254	77446	Heg1	brown	0.362642	0.246654	0.653814	0.0211036	0.814571	0.00125309
ENSMUSG00000055733	54561	Nap1l3	brown	0.147829	0.646596	0.493998	0.102603	0.785982	0.00243763
ENSMUSG00000074183	14857	Gsta1	brown	0.0798485	0.805159	0.618583	0.0320118	0.807445	0.00149385
ENSMUSG00000061603	238161	Akap6	brown	-0.0220962	0.945658	0.749538	0.00500631	0.701273	0.0110469
ENSMUSG00000090273	100504446	Prr22	brown	-0.000630606	0.998448	0.635355	0.0264095	0.681917	0.0145792
ENSMUSG00000063558	11761	Aox1	brown	0.195884	0.541769	0.776649	0.00296681	0.616024	0.032936
ENSMUSG00000030754	70349	Copb1	brown	0.266843	0.4018	0.745041	0.00542712	0.738936	0.00604027
ENSMUSG00000029482	78894	Aacs	brown	0.272347	0.391785	0.679948	0.0149801	0.640101	0.0249623
ENSMUSG00000020576	71169	Nbas	brown	-0.154982	0.630552	0.707123	0.010117	0.923712	1.78859e-05
ENSMUSG00000005465	50931	Il27ra	brown	0.748703	0.00508258	0.940296	5.40211e-06	0.675787	0.015854
ENSMUSG00000027349	68215	Fam98b	brown	0.1044	0.746776	0.89088	0.000101182	0.776822	0.00295631
ENSMUSG00000031575	23808	Ash2l	brown	0.289638	0.361163	0.788439	0.00231115	0.772203	0.00324773
ENSMUSG00000045509	238725	Gpr150	brown	-0.337176	0.283822	0.524255	0.0801694	0.755741	0.00446695
ENSMUSG00000026558	80914	Uck2	brown	-0.417857	0.176481	0.779497	0.00279688	0.675504	0.0159149
ENSMUSG00000000532	11479	Acvr1b	brown	0.647634	0.0227842	0.864737	0.000282906	0.715769	0.00885123
ENSMUSG00000036743	73677	Psma8	brown	-0.0380772	0.906475	0.661902	0.0190429	0.658881	0.0197946
ENSMUSG00000026150	75734	Mff	brown	0.312051	0.323426	0.801046	0.001739	0.757544	0.00431878
ENSMUSG00000036309	21402	Skp1a	brown	0.0422115	0.896367	0.60619	0.0366659	0.64062	0.0248074
ENSMUSG00000059278	78304	Naa38	brown	0.561354	0.0575472	0.770648	0.00335057	0.711285	0.00949198
ENSMUSG00000040822	58248	1700123O20Rik	brown	0.726106	0.00749745	0.711061	0.00952489	0.871279	0.000223345
ENSMUSG00000051747	22138	Ttn	brown	0.206394	0.519843	0.946275	3.21979e-06	0.713334	0.00919504
ENSMUSG00000018861	14149	Fdxr	brown	0.570937	0.0525197	0.620343	0.031387	0.887719	0.000116073
ENSMUSG00000029003	71890	Mad2l2	brown	0.798488	0.00184519	0.755068	0.00452326	0.791456	0.00216274
ENSMUSG00000014980	66637	Tsen15	brown	0.17974	0.57618	0.872897	0.000210247	0.764428	0.00378698
ENSMUSG00000031432	19139	Prps1	brown	0.138743	0.667174	0.793814	0.00205195	0.759843	0.00413523
ENSMUSG00000073568	381142	Arl14epl	brown	0.447214	0.144928	0.552605	0.062421	0.981179	1.802e-08
ENSMUSG00000047880	12145	Cxcr5	brown	0.383019	0.219098	0.88379	0.000136915	0.964811	4.00523e-07
ENSMUSG00000029775	76788	Klhdc10	brown	0.207124	0.518335	0.864497	0.000285299	0.724464	0.00770138
ENSMUSG00000015501	15273	Hivep2	brown	0.636579	0.0260305	0.827301	0.000898309	0.887013	0.000119621
ENSMUSG00000034786	106512	Gpsm3	brown	0.687949	0.0134	0.865298	0.000277357	0.717351	0.00863301
ENSMUSG00000093674	67945	Rpl41	brown	0.732893	0.00669718	0.923766	1.78233e-05	0.705394	0.0103856
ENSMUSG00000020798	77577	Spns3	brown	0.719467	0.00834748	0.85688	0.000370034	0.752721	0.00472376
ENSMUSG00000052549	74448	Arl13a	brown	0.447214	0.144928	0.838399	0.000657306	0.704589	0.0105123
ENSMUSG00000004127	108943	Trmt10a	brown	-0.16309	0.612543	0.802519	0.00168002	0.67666	0.0156677
ENSMUSG00000028990	69151	Lzic	brown	0.285873	0.36772	0.815932	0.0012107	0.762616	0.00392183
ENSMUSG00000079478	56390	Sssca1	brown	0.243972	0.444768	0.742427	0.00568359	0.746116	0.00532414
ENSMUSG00000026502	78825	Desi2	brown	0.157822	0.624222	0.812918	0.00130606	0.834704	0.000731153
ENSMUSG00000068184	75597	Ndufaf2	brown	-0.289559	0.361299	0.969333	2.02886e-07	0.672767	0.0165113
ENSMUSG00000027281	74243	Slx4ip	brown	0.0606199	0.851547	0.643284	0.0240242	0.815234	0.0012323
ENSMUSG00000048029	226265	Eno4	brown	-0.0462743	0.886446	0.975941	6.09763e-08	0.768151	0.00352091
ENSMUSG00000021448	20418	Shc3	brown	0.00808887	0.980096	0.637633	0.0257073	0.896479	7.85153e-05
ENSMUSG00000034333	223773	Zbed4	brown	0.421794	0.17202	0.790335	0.00221701	0.957311	1.03913e-06
ENSMUSG00000047434	268880	Xxylt1	brown	0.70336	0.0107082	0.75101	0.0048741	0.770714	0.00334612
ENSMUSG00000014776	78688	Nol3	brown	0.693504	0.0123779	0.909911	4.01114e-05	0.898589	7.10925e-05
ENSMUSG00000079700	14294	Fpr3	brown	NA	NA	0.94209	4.65182e-06	0.68463	0.0140398
ENSMUSG00000054814	69727	Usp46	brown	0.415416	0.179282	0.754981	0.00453058	0.70685	0.0101591
ENSMUSG00000022983	224432	Scaf4	brown	-0.0518942	0.872749	0.616757	0.0326695	0.819349	0.00110919
ENSMUSG00000020902	18208	Ntn1	brown	0.714853	0.00897933	0.961381	6.34031e-07	0.716461	0.00875523
ENSMUSG00000022772	320213	Senp5	brown	0.996541	3.87556e-12	0.9985	5.96476e-14	0.765247	0.00372714
ENSMUSG00000027086	320720	Fastkd1	brown	0.143794	0.655708	0.825821	0.000934998	0.852293	0.000429762
ENSMUSG00000032409	245000	Atr	brown	0.578166	0.0489368	0.850324	0.000457592	0.961764	6.03548e-07
ENSMUSG00000002524	67959	Puf60	brown	0.510338	0.0900249	0.771028	0.00332518	0.810299	0.00139352
ENSMUSG00000039221	68028	Rpl22l1	brown	0.727874	0.00728244	0.810159	0.0013983	0.775698	0.0030253
ENSMUSG00000031878	234664	Nae1	brown	0.239486	0.453445	0.904223	5.39423e-05	0.883635	0.000137793
ENSMUSG00000040824	107686	Snrpd2	brown	0.711321	0.00948666	0.967176	2.83991e-07	0.856816	0.000370825
ENSMUSG00000044367	69309	Slc16a13	brown	0.248232	0.436604	0.859385	0.000340262	0.900623	6.44699e-05
ENSMUSG00000020843	56322	Timm22	brown	0.535797	0.0725748	0.844109	0.000554694	0.842683	0.000579054
ENSMUSG00000020549	68626	Elac2	brown	0.74693	0.00524719	0.836869	0.000687156	0.942861	4.35606e-06
ENSMUSG00000027327	67326	1700037H04Rik	brown	0.850333	0.000457469	0.81514	0.00123523	0.884088	0.000135233
ENSMUSG00000026035	70225	Ppil3	brown	-0.953093	1.65258e-06	0.857701	0.000360065	0.897927	7.33601e-05
ENSMUSG00000025208	94067	Mrpl43	brown	0.618773	0.0319441	0.898581	7.1118e-05	0.870491	0.000229945
ENSMUSG00000013822	66126	Elof1	brown	0.316602	0.316039	0.806501	0.00152827	0.784696	0.00250591
ENSMUSG00000057278	68011	Snrpg	brown	0.575308	0.0503322	0.874475	0.000198065	0.774937	0.00307272
ENSMUSG00000034211	66258	Mrps17	brown	0.608335	0.0358281	0.91391	3.21858e-05	0.844062	0.000555476
ENSMUSG00000024594	73137	Prrc1	brown	-0.0130411	0.967914	0.894543	8.58477e-05	0.863492	0.00029552
ENSMUSG00000020471	18972	Pold2	brown	0.342442	0.275889	0.885443	0.000127814	0.933297	9.29132e-06
ENSMUSG00000020821	16562	Kif1c	brown	0.568334	0.0538532	0.898799	7.03849e-05	0.877598	0.000175578
ENSMUSG00000001445	107732	Mrpl10	brown	0.293266	0.354904	0.691494	0.0127409	0.856399	0.000375971
ENSMUSG00000030086	66098	Chchd6	brown	0.563186	0.0565609	0.910863	3.80978e-05	0.88683	0.000120552
ENSMUSG00000022770	13383	Dlg1	brown	-0.165261	0.607753	0.797609	0.00188279	0.832594	0.000776102
ENSMUSG00000038212	66631	Mfsd14b	brown	-0.0783353	0.80879	0.82099	0.00106284	0.809333	0.00142688
ENSMUSG00000029185	68303	Fam114a1	brown	0.796129	0.00194745	0.990318	6.59173e-10	0.910034	3.98469e-05
ENSMUSG00000032562	14678	Gnai2	brown	0.098135	0.76157	0.922722	1.90436e-05	0.869816	0.000235725
ENSMUSG00000021693	16563	Kif2a	brown	-0.132871	0.680588	0.817292	0.00116948	0.923075	1.86246e-05
ENSMUSG00000035443	77862	Thyn1	brown	-0.297128	0.348303	0.980217	2.30871e-08	0.842098	0.000589301
ENSMUSG00000026784	56075	Pdss1	brown	0.691023	0.0128271	0.942884	4.34734e-06	0.883537	0.000138349
ENSMUSG00000019986	52906	Ahi1	brown	0.553127	0.0621227	0.890804	0.000101523	0.830135	0.000831151
ENSMUSG00000032078	22687	Zpr1	brown	0.0128317	0.968429	0.848215	0.000488927	0.899644	6.75938e-05
ENSMUSG00000047867	231931	Gimap6	brown	0.973934	9.07115e-08	0.828921	0.000859426	0.90056	6.46674e-05
ENSMUSG00000026511	27058	Srp9	brown	0.543429	0.0678334	0.951453	1.95709e-06	0.867623	0.000255279
ENSMUSG00000049960	66242	Mrps16	brown	0.320413	0.309925	0.801111	0.00173639	0.940625	5.25785e-06
ENSMUSG00000063171	66184	Rps4l	brown	0.689027	0.0131969	0.945023	3.60529e-06	0.951452	1.95712e-06
ENSMUSG00000020687	217232	Cdc27	brown	0.710679	0.0095812	0.876675	0.000182008	0.863067	0.000299925
ENSMUSG00000018293	18643	Pfn1	brown	0.988523	1.53844e-09	0.994118	5.49124e-11	0.988192	1.77241e-09
ENSMUSG00000031562	320685	Dctd	brown	0.365027	0.243329	0.756031	0.00444287	0.799428	0.00180562
ENSMUSG00000040599	67139	Mis12	brown	0.655525	0.0206547	0.979265	2.91547e-08	0.908181	4.39817e-05
ENSMUSG00000031818	12857	Cox4i1	brown	0.353305	0.259931	0.943636	4.07413e-06	0.780262	0.00275254
ENSMUSG00000056888	73690	Glipr1	brown	0.882914	0.000141933	0.989973	7.84791e-10	0.986551	3.38854e-09
ENSMUSG00000021810	70601	Ecd	brown	0.552042	0.0627445	0.858	0.000356482	0.856737	0.000371799
ENSMUSG00000039128	98828	Cdc123	brown	0.0451918	0.889088	0.724679	0.00767439	0.851028	0.000447481
ENSMUSG00000056209	18150	Npm3	brown	0.531444	0.0753783	0.836231	0.0006999	0.884899	0.000130754
ENSMUSG00000017404	19921	Rpl19	brown	0.782004	0.00265353	0.98553	4.87651e-09	0.968505	2.31502e-07
ENSMUSG00000017756	20499	Slc12a7	brown	-0.578247	0.0488975	0.876874	0.000180602	0.965643	3.55894e-07
ENSMUSG00000022706	18100	Mrpl40	brown	0.850671	0.000452586	0.942256	4.5868e-06	0.858518	0.000350344
ENSMUSG00000040620	216877	Dhx33	brown	0.8614	0.000317692	0.872326	0.000214798	0.940266	5.41524e-06
ENSMUSG00000053838	209586	Nudcd3	brown	0.937185	6.92702e-06	0.965943	3.40776e-07	0.939997	5.53595e-06
ENSMUSG00000036737	108737	Oxsr1	brown	-0.201065	0.530911	0.839138	0.000643258	0.931305	1.07272e-05
ENSMUSG00000024287	225160	Thoc1	brown	0.676195	0.0157668	0.933077	9.44181e-06	0.947364	2.91178e-06
ENSMUSG00000033356	78895	Pus7l	brown	0.148829	0.644345	0.95276	1.71111e-06	0.852452	0.000427573
ENSMUSG00000024493	107045	Lars	brown	0.697583	0.0116651	0.980708	2.03758e-08	0.975772	6.31332e-08
ENSMUSG00000021807	68045	Rtraf	brown	0.440996	0.151282	0.950723	2.10608e-06	0.928771	1.28021e-05
ENSMUSG00000010376	18002	Nedd8	brown	0.582319	0.0469581	0.993877	6.71075e-11	0.938564	6.21415e-06
ENSMUSG00000027593	19383	Raly	brown	0.212903	0.50646	0.864298	0.0002873	0.843321	0.000568056
ENSMUSG00000021759	19012	Plpp1	brown	0.921567	2.04702e-05	0.999175	3.00336e-15	0.992243	2.18294e-10
ENSMUSG00000019863	76563	Qrsl1	brown	0.351589	0.262416	0.950637	2.12422e-06	0.852177	0.000431375
ENSMUSG00000028062	83409	Lamtor2	brown	-0.454127	0.138067	0.877914	0.000173422	0.886941	0.000119989
ENSMUSG00000002797	110175	Ggct	brown	0.695973	0.0119427	0.973045	1.07112e-07	0.988467	1.57641e-09
ENSMUSG00000017307	170789	Acot8	brown	0.420798	0.173142	0.871202	0.000223986	0.941907	4.72423e-06
ENSMUSG00000028617	77809	Lrrc42	brown	0.00135329	0.99667	0.90998	3.99619e-05	0.867832	0.000253355
ENSMUSG00000042229	98710	Rabif	brown	-0.426685	0.166577	0.936472	7.32029e-06	0.952512	1.75585e-06
ENSMUSG00000062345	18788	Serpinb2	brown	0.959118	8.39606e-07	0.96993	1.84103e-07	0.99389	6.63637e-11
ENSMUSG00000025508	67186	Rplp2	brown	0.642971	0.0241155	0.939327	5.84509e-06	0.858611	0.000349256
ENSMUSG00000021993	70478	Mipep	brown	0.333412	0.289571	0.942365	4.54464e-06	0.907671	4.5176e-05
ENSMUSG00000033793	108664	Atp6v1h	brown	0.679537	0.0150648	0.978488	3.49985e-08	0.952977	1.67293e-06
ENSMUSG00000035274	21983	Tpbg	brown	0.322158	0.307147	0.869053	0.000242393	0.833501	0.000756536
ENSMUSG00000032301	26441	Psma4	brown	0.977906	3.99545e-08	0.995982	8.18898e-12	0.987611	2.2512e-09
ENSMUSG00000091537	66167	Tma7	brown	0.855926	0.000381889	0.987507	2.34721e-09	0.859537	0.000338517
ENSMUSG00000050493	230766	Fam167b	brown	-0.327758	0.298328	0.939234	5.88938e-06	0.954147	1.47782e-06
ENSMUSG00000025204	67264	Ndufb8	brown	0.670383	0.0170443	0.978895	3.18307e-08	0.931221	1.07912e-05
ENSMUSG00000035242	18245	Oaz1	brown	0.535106	0.0730148	0.87702	0.000179583	0.853549	0.000412711
ENSMUSG00000031557	83436	Plekha2	brown	0.693431	0.0123911	0.987057	2.79899e-09	0.974298	8.46101e-08
ENSMUSG00000024446	67676	Rpp21	brown	-0.0106782	0.973726	0.860688	0.000325535	0.974334	8.40249e-08
ENSMUSG00000002603	21803	Tgfb1	brown	0.877868	0.000173736	0.987265	2.5818e-09	0.993908	6.54302e-11
ENSMUSG00000024621	12978	Csf1r	brown	0.264957	0.405261	0.962022	5.83771e-07	0.947921	2.76376e-06
ENSMUSG00000066009	626316	Zfp987	brown	0.867578	0.000255692	0.877534	0.000176022	0.904857	5.22383e-05
ENSMUSG00000030960	72096	Eef1akmt2	brown	0.0214072	0.94735	0.856496	0.000374777	0.919587	2.31077e-05
ENSMUSG00000038489	66491	Polr2l	brown	0.76345	0.00385935	0.982346	1.31099e-08	0.958048	9.5364e-07
ENSMUSG00000032330	12866	Cox7a2	brown	0.85883	0.000346693	0.983691	8.84139e-09	0.913666	3.26307e-05
ENSMUSG00000020514	216767	Mrpl22	brown	0.793396	0.00207128	0.92065	2.16608e-05	0.956056	1.19866e-06
ENSMUSG00000045136	73710	Tubb2b	brown	0.782482	0.00262684	0.990632	5.59494e-10	0.991421	3.60731e-10
ENSMUSG00000041079	53858	Rwdd2b	brown	0.585582	0.0454439	0.876688	0.000181912	0.824353	0.000972496
ENSMUSG00000028327	74152	Stra6l	brown	0.127439	0.693072	0.941753	4.78632e-06	0.885587	0.000127047
ENSMUSG00000029622	11867	Arpc1b	brown	0.94366	4.06562e-06	0.990902	4.83423e-10	0.990324	6.57083e-10
ENSMUSG00000055334	66069	Snupn	brown	0.485339	0.109721	0.906025	4.92089e-05	0.909911	4.01117e-05
ENSMUSG00000020238	103425	Ncln	brown	0.968475	2.3259e-07	0.985875	4.32415e-09	0.992742	1.56682e-10
ENSMUSG00000029674	16885	Limk1	brown	0.576403	0.0497943	0.82478	0.000961464	0.852816	0.000422606
ENSMUSG00000029066	66448	Mrpl20	brown	0.905437	5.0716e-05	0.996163	6.50847e-12	0.977021	4.85484e-08
ENSMUSG00000046032	55988	Snx12	brown	0.789019	0.00228204	0.884163	0.000134816	0.880176	0.000158562
ENSMUSG00000024735	28000	Prpf19	brown	-0.207015	0.518559	0.908901	4.23357e-05	0.903568	5.57506e-05
ENSMUSG00000037697	114874	Ddhd1	brown	0.461031	0.131428	0.971838	1.33072e-07	0.967021	2.90667e-07
ENSMUSG00000024966	20867	Stip1	brown	0.95217	1.81888e-06	0.985085	5.66982e-09	0.98481	6.20799e-09
ENSMUSG00000000001	14679	Gnai3	brown	0.765364	0.0037187	0.96893	2.16432e-07	0.899056	6.95274e-05
ENSMUSG00000037373	13016	Ctbp1	brown	0.880776	0.000154797	0.929219	1.24132e-05	0.905412	5.07818e-05
ENSMUSG00000062963	66155	Ufc1	brown	0.750088	0.00495666	0.955907	1.21873e-06	0.913989	3.20418e-05
ENSMUSG00000021952	57258	Xpo4	brown	0.355457	0.256835	0.93071	1.11886e-05	0.970742	1.60765e-07
ENSMUSG00000034203	72170	Chchd4	brown	0.784321	0.00252609	0.98678	3.11066e-09	0.994435	4.16374e-11
ENSMUSG00000035107	73379	Dcbld2	brown	0.974234	8.56485e-08	0.993983	6.1506e-11	0.993105	1.21318e-10
ENSMUSG00000057375	230584	Yipf1	brown	0.747337	0.00520904	0.875389	0.000191266	0.901944	6.04353e-05
ENSMUSG00000005575	22192	Ube2m	brown	0.746738	0.0052653	0.980446	2.17895e-08	0.945347	3.50237e-06
ENSMUSG00000052337	76614	Immt	brown	0.95755	1.01077e-06	0.995361	1.6795e-11	0.995974	8.27859e-12
ENSMUSG00000073616	66915	Cops9	brown	0.745078	0.00542357	0.963609	4.72811e-07	0.923905	1.7666e-05
ENSMUSG00000039067	17463	Psmd7	brown	0.977098	4.77519e-08	0.987725	2.15029e-09	0.998312	1.07625e-13
ENSMUSG00000045763	70350	Basp1	brown	0.851395	0.000442291	0.908479	4.32954e-05	0.94413	3.9017e-06
ENSMUSG00000041459	230908	Tardbp	brown	0.329964	0.294895	0.86444	0.000285874	0.976641	5.26626e-08
ENSMUSG00000030714	75565	Sgf29	brown	0.110329	0.732846	0.983501	9.36574e-09	0.899725	6.73294e-05
ENSMUSG00000003099	19060	Ppp5c	brown	-0.407608	0.188431	0.940487	5.31785e-06	0.962551	5.44693e-07
ENSMUSG00000004356	70683	Utp20	brown	-0.129042	0.68938	0.886291	0.000123334	0.945666	3.40292e-06
ENSMUSG00000028745	12345	Capzb	brown	-0.389514	0.210722	0.846337	0.000518213	0.912611	3.461e-05
ENSMUSG00000020608	67241	Smc6	brown	-0.1158	0.720058	0.851626	0.000439037	0.912448	3.49247e-05
ENSMUSG00000035725	19108	Prkx	brown	0.696112	0.0119186	0.975856	6.20462e-08	0.997709	4.94623e-13
ENSMUSG00000028032	23971	Papss1	brown	0.575203	0.0503837	0.925802	1.56215e-05	0.934952	8.21769e-06
ENSMUSG00000055762	66656	Eef1d	brown	-0.0640531	0.843229	0.905558	5.04039e-05	0.933222	9.34221e-06
ENSMUSG00000026895	68375	Ndufa8	brown	0.456404	0.135853	0.998433	7.42605e-14	0.965358	3.70685e-07
ENSMUSG00000049751	66483	Rpl36al	brown	0.932554	9.80772e-06	0.995492	1.45447e-11	0.959912	7.62191e-07
ENSMUSG00000041891	70361	Lman1	brown	0.839884	0.000629306	0.97639	5.55359e-08	0.979203	2.9591e-08
ENSMUSG00000022407	11564	Adsl	brown	0.797632	0.0018818	0.982133	1.39168e-08	0.972761	1.12814e-07
ENSMUSG00000027170	98221	Eif3m	brown	0.373291	0.23201	0.93506	8.15137e-06	0.887793	0.000115707
ENSMUSG00000003037	17274	Rab8a	brown	0.893898	8.84051e-05	0.988901	1.3022e-09	0.984405	7.07734e-09
ENSMUSG00000004610	110826	Etfb	brown	-0.124993	0.698719	0.936104	7.52988e-06	0.979177	2.97751e-08
ENSMUSG00000036138	113868	Acaa1a	brown	0.815046	0.00123818	0.985531	4.87392e-09	0.993169	1.15834e-10
ENSMUSG00000027394	69737	Ttl	brown	0.429165	0.163859	0.740264	0.00590263	0.935368	7.96409e-06
ENSMUSG00000041697	12861	Cox6a1	brown	0.598211	0.0399064	0.980686	2.04935e-08	0.935563	7.84725e-06
ENSMUSG00000057541	78697	Pus7	brown	0.34138	0.277478	0.862504	0.000305842	0.855696	0.000384792
ENSMUSG00000042670	66541	Immp1l	brown	0.517649	0.0847507	0.938336	6.32774e-06	0.869768	0.00023614
ENSMUSG00000054720	100604	Lrrc8c	brown	0.721392	0.00809395	0.960912	6.72896e-07	0.985432	5.04249e-09
ENSMUSG00000020368	12330	Canx	brown	-0.172073	0.592818	0.882486	0.000144441	0.908315	4.36721e-05
ENSMUSG00000081534	67739	Slc48a1	brown	0.990079	7.44325e-10	0.995988	8.12876e-12	0.998979	8.70363e-15
ENSMUSG00000068882	20823	Ssb	brown	0.781244	0.00269638	0.958027	9.56061e-07	0.929163	1.24618e-05
ENSMUSG00000028691	18477	Prdx1	brown	0.994676	3.33894e-11	0.998239	1.3305e-13	0.999463	3.50441e-16
ENSMUSG00000030471	243983	Zdhhc13	brown	0.905402	5.08078e-05	0.992951	1.3545e-10	0.935073	8.14313e-06
ENSMUSG00000059323	72749	Tonsl	brown	0.956082	1.19504e-06	0.996677	3.17181e-12	0.982803	1.15096e-08
ENSMUSG00000017715	74451	Pgs1	brown	0.404014	0.192737	0.9519	1.87002e-06	0.956525	1.13691e-06
ENSMUSG00000021018	245841	Polr2h	brown	0.587241	0.0446872	0.940276	5.411e-06	0.924233	1.72978e-05
ENSMUSG00000025102	67290	3110040N11Rik	brown	-0.0844185	0.794213	0.826585	0.00091591	0.872184	0.000215942
ENSMUSG00000022831	15163	Hcls1	brown	0.996713	3.00687e-12	0.995432	1.55382e-11	0.99943	4.71778e-16
ENSMUSG00000095115	319622	Itpripl2	brown	0.951459	1.9558e-06	0.970423	1.69632e-07	0.986242	3.79397e-09
ENSMUSG00000062661	14299	Ncs1	brown	0.546192	0.0661707	0.854994	0.000393755	0.833012	0.000767032
ENSMUSG00000029715	74097	Pop7	brown	0.824053	0.000980327	0.970335	1.72142e-07	0.921807	2.01672e-05
ENSMUSG00000087303	101055671	Lipo2	brown	0.755859	0.00445714	0.911889	3.60199e-05	0.887134	0.000119004
ENSMUSG00000032575	74840	Manf	brown	0.78146	0.00268417	0.987112	2.74065e-09	0.984929	5.96989e-09
ENSMUSG00000030061	22200	Uba3	brown	-0.0505104	0.876119	0.935447	7.91618e-06	0.972308	1.2243e-07
ENSMUSG00000022557	12181	Bop1	brown	0.964026	4.46661e-07	0.988102	1.84099e-09	0.998068	2.11295e-13
ENSMUSG00000031826	22224	Usp10	brown	0.864561	0.00028466	0.990715	5.35191e-10	0.985058	5.72144e-09
ENSMUSG00000020841	12874	Cpd	brown	0.960741	6.87573e-07	0.993019	1.29037e-10	0.999102	4.58023e-15
ENSMUSG00000039191	19664	Rbpj	brown	0.986376	3.61261e-09	0.992013	2.52554e-10	0.996112	6.94798e-12
ENSMUSG00000025762	214048	Larp1b	brown	0.0736717	0.820004	0.942135	4.63415e-06	0.943424	4.14976e-06
ENSMUSG00000009207	69605	Lnpk	brown	0.162643	0.613532	0.923381	1.82667e-05	0.912003	3.57941e-05
ENSMUSG00000071041	100042069	Impdh2-ps	brown	0.872018	0.00021729	0.949818	2.30303e-06	0.897724	7.40667e-05
ENSMUSG00000001424	56463	Snd1	brown	0.347333	0.268637	0.985355	5.17657e-09	0.992995	1.31272e-10
ENSMUSG00000026177	18173	Slc11a1	brown	0.961076	6.5907e-07	0.996154	6.5855e-12	0.996027	7.74038e-12
ENSMUSG00000051695	23983	Pcbp1	brown	0.143094	0.657293	0.973464	9.91121e-08	0.951931	1.86404e-06
ENSMUSG00000024537	107047	Psmg2	brown	0.332926	0.290318	0.917408	2.63147e-05	0.919429	2.33294e-05
ENSMUSG00000013698	18611	Pea15a	brown	0.963725	4.65419e-07	0.99638	4.86555e-12	0.982967	1.09744e-08
ENSMUSG00000054836	72341	Elp6	brown	0.865727	0.000273174	0.972463	1.19073e-07	0.941967	4.70065e-06
ENSMUSG00000031467	52123	Agpat5	brown	0.800795	0.00174921	0.988371	1.64276e-09	0.979393	2.82738e-08
ENSMUSG00000026377	67949	Nifk	brown	0.869668	0.000237007	0.982419	1.28437e-08	0.977274	4.59553e-08
ENSMUSG00000008373	68988	Prpf31	brown	0.961341	6.37222e-07	0.98675	3.14607e-09	0.989957	7.91347e-10
ENSMUSG00000042426	218629	Dhx29	brown	0.588189	0.0442585	0.985707	4.58608e-09	0.973598	9.666e-08
ENSMUSG00000022799	12549	Arhgap31	brown	0.944781	3.68387e-06	0.966763	3.02083e-07	0.989587	9.47545e-10
ENSMUSG00000033075	223870	Senp1	brown	0.617137	0.0325318	0.906055	4.91324e-05	0.954314	1.45142e-06
ENSMUSG00000044018	28028	Mrpl50	brown	0.136474	0.672349	0.986292	3.7254e-09	0.982238	1.35154e-08
ENSMUSG00000020573	30955	Pik3cg	brown	0.454154	0.13804	0.946776	3.07528e-06	0.965609	3.57604e-07
ENSMUSG00000045438	68033	Cox19	brown	0.466981	0.125876	0.870896	0.000226535	0.8795	0.000162893
ENSMUSG00000045752	56844	Tssc4	brown	0.363887	0.244915	0.807176	0.00150359	0.988413	1.61331e-09
ENSMUSG00000023249	235587	Parp3	brown	0.625218	0.0297026	0.931763	1.03825e-05	0.945753	3.37625e-06
ENSMUSG00000041360	52874	Pum3	brown	0.806872	0.00151466	0.974838	7.61554e-08	0.973093	1.06166e-07
ENSMUSG00000022858	20462	Tra2b	brown	0.955369	1.29373e-06	0.977983	3.92678e-08	0.993546	8.72404e-11
ENSMUSG00000029404	65105	Arl6ip4	brown	0.751276	0.00485051	0.977198	4.67233e-08	0.977756	4.13152e-08
ENSMUSG00000062937	66902	Mtap	brown	0.721199	0.00811915	0.970382	1.70789e-07	0.962915	5.19082e-07
ENSMUSG00000055172	50909	C1ra	brown	0.851957	0.000434416	0.991932	2.65668e-10	0.982678	1.19319e-08
ENSMUSG00000027823	229363	Gmps	brown	0.56656	0.054776	0.892069	9.59887e-05	0.860796	0.000324341
ENSMUSG00000063273	74838	Naa15	brown	0.523503	0.0806823	0.991321	3.82181e-10	0.984973	5.88538e-09
ENSMUSG00000030704	19346	Rab6a	brown	0.794319	0.00202878	0.9736	9.66125e-08	0.947232	2.94808e-06
ENSMUSG00000061315	17938	Naca	brown	0.372852	0.232603	0.97384	9.23403e-08	0.954188	1.47132e-06
ENSMUSG00000043336	78749	Filip1l	brown	0.976105	5.89403e-08	0.976915	4.96717e-08	0.992457	1.89843e-10
ENSMUSG00000024844	23825	Banf1	brown	0.919996	2.25423e-05	0.983483	9.41691e-09	0.950242	2.20913e-06
ENSMUSG00000029146	266781	Snx17	brown	0.826439	0.00091952	0.976474	5.45615e-08	0.97311	1.05837e-07
ENSMUSG00000028800	433759	Hdac1	brown	0.97196	1.30237e-07	0.986021	4.10726e-09	0.995718	1.12529e-11
ENSMUSG00000028741	69902	Mrto4	brown	0.857306	0.000364837	0.932474	9.86518e-06	0.936783	7.14664e-06
ENSMUSG00000025995	73674	Wdr75	brown	0.792646	0.00210629	0.947622	2.84262e-06	0.951937	1.8629e-06
ENSMUSG00000028886	14050	Eya3	brown	0.831512	0.000799972	0.897323	7.54754e-05	0.956955	1.08254e-06
ENSMUSG00000058183	27390	Mmel1	brown	0.601672	0.0384771	0.904861	5.22285e-05	0.943997	3.94772e-06
ENSMUSG00000025290	20088	Rps24	brown	0.806668	0.00152212	0.977372	4.49843e-08	0.924994	1.64686e-05
ENSMUSG00000037772	19935	Mrpl23	brown	0.875238	0.000192379	0.989043	1.22107e-09	0.942368	4.54351e-06
ENSMUSG00000024726	67383	Carnmt1	brown	0.295487	0.351099	0.926041	1.53786e-05	0.919298	2.35156e-05
ENSMUSG00000022947	109857	Cbr3	brown	0.254132	0.425416	0.920044	2.24767e-05	0.922691	1.90806e-05
ENSMUSG00000032557	66663	Uba5	brown	0.968819	2.20289e-07	0.986439	3.53082e-09	0.980378	2.21661e-08
ENSMUSG00000036751	110323	Cox6b1	brown	0.81498	0.00124023	0.975113	7.2108e-08	0.890643	0.000102245
ENSMUSG00000026869	66998	Psmd5	brown	-0.373512	0.231713	0.961372	6.34761e-07	0.941493	4.89181e-06
ENSMUSG00000033938	66916	Ndufb7	brown	0.6334	0.027023	0.972236	1.24006e-07	0.90691	4.70078e-05
ENSMUSG00000072582	217057	Ptrh2	brown	-0.0351472	0.913647	0.923477	1.8155e-05	0.981577	1.62068e-08
ENSMUSG00000025155	68730	Dus1l	brown	0.682359	0.0144903	0.963165	5.01988e-07	0.979869	2.51732e-08
ENSMUSG00000038975	19352	Rabggtb	brown	0.78626	0.00242307	0.973843	9.22899e-08	0.936536	7.28421e-06
ENSMUSG00000020022	66414	Ndufa12	brown	0.758901	0.00420978	0.961465	6.27241e-07	0.942655	4.43346e-06
ENSMUSG00000026005	66646	Rpe	brown	0.795565	0.00197251	0.978261	3.68695e-08	0.975138	7.17526e-08
ENSMUSG00000038127	67501	Ccdc50	brown	0.669741	0.01719	0.990415	6.27123e-10	0.984494	6.87788e-09
ENSMUSG00000027384	69487	Ndufaf5	brown	0.188793	0.556777	0.953762	1.53981e-06	0.980012	2.42974e-08
ENSMUSG00000028622	56280	Mrpl37	brown	0.789464	0.00225989	0.961782	6.02169e-07	0.971775	1.34553e-07
ENSMUSG00000004460	67838	Dnajb11	brown	0.981801	1.52486e-08	0.995475	1.48199e-11	0.998655	3.45864e-14
ENSMUSG00000035890	70294	Rnf126	brown	0.924067	1.74836e-05	0.959258	8.25563e-07	0.935742	7.74103e-06
ENSMUSG00000025439	12729	Clns1a	brown	0.941957	4.7047e-06	0.943634	4.07476e-06	0.934855	8.27762e-06
ENSMUSG00000036977	68999	Anapc10	brown	0.603551	0.0377161	0.972547	1.17275e-07	0.899446	6.82401e-05
ENSMUSG00000022337	66736	Emc2	brown	0.847066	0.000506685	0.988716	1.41361e-09	0.980683	2.05077e-08
ENSMUSG00000032553	20818	Srprb	brown	0.887608	0.000116624	0.987075	2.77994e-09	0.976237	5.73453e-08
ENSMUSG00000025934	14859	Gsta3	brown	0.952708	1.72047e-06	0.989063	1.20993e-09	0.987075	2.78029e-09
ENSMUSG00000029610	231872	Aimp2	brown	0.552834	0.0622902	0.936432	7.34269e-06	0.912058	3.56847e-05
ENSMUSG00000028149	229877	Rap1gds1	brown	-0.423928	0.169632	0.992547	1.78859e-10	0.972938	1.09239e-07
ENSMUSG00000036613	380752	Eipr1	brown	0.832651	0.000774873	0.945395	3.48704e-06	0.977852	4.04409e-08
ENSMUSG00000064120	56738	Mocs1	brown	0.983554	9.21879e-09	0.978575	3.42974e-08	0.997384	9.6013e-13
ENSMUSG00000062867	23918	Impdh2	brown	0.960732	6.88337e-07	0.939526	5.75176e-06	0.940686	5.2314e-06
ENSMUSG00000014313	12864	Cox6c	brown	0.96425	4.33086e-07	0.966153	3.30507e-07	0.919229	2.36131e-05
ENSMUSG00000005312	56085	Ubqln1	brown	0.828554	0.000868114	0.990615	5.64438e-10	0.97269	1.14292e-07
ENSMUSG00000041319	386612	Thoc6	brown	0.870853	0.000226892	0.992242	2.18471e-10	0.974335	8.39992e-08
ENSMUSG00000060791	63986	Gmfg	brown	0.955517	1.27272e-06	0.993842	6.90207e-11	0.981651	1.58844e-08
ENSMUSG00000063694	13063	Cycs	brown	0.992592	1.73548e-10	0.99302	1.28962e-10	0.998374	8.93436e-14
ENSMUSG00000030493	101831	Faap24	brown	0.980807	1.98597e-08	0.938543	6.22427e-06	0.953796	1.53425e-06
ENSMUSG00000020180	67332	Snrpd3	brown	0.859727	0.000336352	0.991557	3.33045e-10	0.984937	5.95562e-09
ENSMUSG00000030615	66271	Tmem126a	brown	0.282589	0.37349	0.974206	8.61087e-08	0.957583	1.00698e-06
ENSMUSG00000027879	20333	Sec22b	brown	0.456269	0.135984	0.931108	1.08786e-05	0.92814	1.33645e-05
ENSMUSG00000026603	226830	Smyd2	brown	0.640306	0.024901	0.930029	1.17361e-05	0.91739	2.63426e-05
ENSMUSG00000012422	66074	Tmem167	brown	0.913912	3.21809e-05	0.987012	2.84772e-09	0.967446	2.72634e-07
ENSMUSG00000022350	223593	Washc5	brown	0.0298988	0.926509	0.990675	5.4667e-10	0.993103	1.21501e-10
ENSMUSG00000024146	56724	Cript	brown	0.913596	3.27589e-05	0.977806	4.08584e-08	0.936154	7.50108e-06
ENSMUSG00000025132	192662	Arhgdia	brown	0.919902	2.26718e-05	0.990718	5.34103e-10	0.988749	1.39326e-09
ENSMUSG00000057322	67671	Rpl38	brown	0.853435	0.000414238	0.975222	7.05575e-08	0.886052	0.000124589
ENSMUSG00000017421	22680	Zfp207	brown	-0.603195	0.0378594	0.958482	9.0601e-07	0.974125	8.74573e-08
ENSMUSG00000020388	30794	Pdlim4	brown	0.916567	2.76425e-05	0.993003	1.30559e-10	0.991049	4.45704e-10
ENSMUSG00000022962	14450	Gart	brown	0.831861	0.000792223	0.988481	1.5664e-09	0.976077	5.9282e-08
ENSMUSG00000001924	22201	Uba1	brown	-0.0837432	0.795828	0.889638	0.000106844	0.952433	1.77032e-06
ENSMUSG00000016308	22209	Ube2a	brown	0.919981	2.25626e-05	0.982632	1.20899e-08	0.981772	1.53704e-08
ENSMUSG00000084957	100503572	Bbip1	brown	0.933356	9.25092e-06	0.97622	5.75433e-08	0.989905	8.11979e-10
ENSMUSG00000062014	63985	Gmfb	brown	0.780389	0.00274521	0.930189	1.1605e-05	0.912079	3.56439e-05
ENSMUSG00000078713	68512	Tomm5	brown	0.0469799	0.884725	0.98562	4.72761e-09	0.978262	3.68631e-08
[truncated: 15,802 more rows]
