# Supplementary material for: Microglia show differential transcriptomic response to Aβ peptide aggregates ex vivo and in vivo
Source: Life Sci Alliance. 2021 Jun 14;4(7):e202101108. doi: 10.26508/lsa.202101108 (PMC8321667; doi:10.26508/lsa.202101108)
Supplement: Supplementary file 31 [file LSA-2021-01108_TableS31.xlsx]

## Sheet: Sheet1
module.name	category	ontology	term	over_represented_pvalue	BHadjust	numDEInCat	numInCat	totalDEG	totalNum	enrichment
antiquewhite4	GO:1990825	MF	sequence-specific mRNA binding	0.00112559	1	2	11	79	16762	38.5777
antiquewhite4	GO:0019788	MF	NEDD8 transferase activity	0.0281717	1	1	6	79	16762	35.3629
antiquewhite4	GO:0031956	MF	medium-chain fatty acid-CoA ligase activity	0.0273343	1	1	6	79	16762	35.3629
antiquewhite4	GO:0102391	MF	decanoate-CoA ligase activity	0.0273343	1	1	6	79	16762	35.3629
antiquewhite4	GO:0003747	MF	translation release factor activity	0.0315304	1	1	7	79	16762	30.311
antiquewhite4	GO:0008079	MF	translation termination factor activity	0.0315304	1	1	7	79	16762	30.311
antiquewhite4	GO:0009922	MF	fatty acid elongase activity	0.0326437	1	1	7	79	16762	30.311
antiquewhite4	GO:0102336	MF	3-oxo-arachidoyl-CoA synthase activity	0.0326437	1	1	7	79	16762	30.311
antiquewhite4	GO:0102337	MF	3-oxo-cerotoyl-CoA synthase activity	0.0326437	1	1	7	79	16762	30.311
antiquewhite4	GO:0102338	MF	3-oxo-lignoceronyl-CoA synthase activity	0.0326437	1	1	7	79	16762	30.311
antiquewhite4	GO:0031957	MF	very long-chain fatty acid-CoA ligase activity	0.0367002	1	1	8	79	16762	26.5222
antiquewhite4	GO:0034987	MF	immunoglobulin receptor binding	0.0370369	1	1	8	79	16762	26.5222
antiquewhite4	GO:0016646	MF	oxidoreductase activity, acting on the CH-NH group of donors, NAD or NADP as acceptor	0.00286878	1	2	17	79	16762	24.962
antiquewhite4	GO:0000774	MF	adenyl-nucleotide exchange factor activity	0.0420619	1	1	9	79	16762	23.5752
antiquewhite4	GO:0004017	MF	adenylate kinase activity	0.041294	1	1	9	79	16762	23.5752
antiquewhite4	GO:0030957	MF	Tat protein binding	0.040527	1	1	9	79	16762	23.5752
antiquewhite4	GO:0099186	MF	structural constituent of postsynapse	0.00351106	1	2	19	79	16762	22.3344
antiquewhite4	GO:0004312	MF	fatty acid synthase activity	0.0463905	1	1	10	79	16762	21.2177
antiquewhite4	GO:0031996	MF	thioesterase binding	0.0461626	1	1	10	79	16762	21.2177
antiquewhite4	GO:0016878	MF	acid-thiol ligase activity	0.00388445	1	2	20	79	16762	21.2177
antiquewhite4	GO:0004467	MF	long-chain fatty acid-CoA ligase activity	0.0495266	1	1	11	79	16762	19.2888
antiquewhite4	GO:0016645	MF	oxidoreductase activity, acting on the CH-NH group of donors	0.00669777	1	2	26	79	16762	16.3213
antiquewhite4	GO:0098918	MF	structural constituent of synapse	0.00808691	1	2	29	79	16762	14.6329
antiquewhite4	GO:0016877	MF	ligase activity, forming carbon-sulfur bonds	0.0092105	1	2	31	79	16762	13.6889
antiquewhite4	GO:0016831	MF	carboxy-lyase activity	0.00926539	1	2	31	79	16762	13.6889
antiquewhite4	GO:0016830	MF	carbon-carbon lyase activity	0.00149746	1	3	48	79	16762	13.2611
antiquewhite4	GO:0051539	MF	4 iron, 4 sulfur cluster binding	0.0144971	1	2	39	79	16762	10.8809
antiquewhite4	GO:0016860	MF	intramolecular oxidoreductase activity	0.0168224	1	2	42	79	16762	10.1037
antiquewhite4	GO:0005200	MF	structural constituent of cytoskeleton	0.0316052	1	2	59	79	16762	7.19245
antiquewhite4	GO:0051540	MF	metal cluster binding	0.0345793	1	2	62	79	16762	6.84443
antiquewhite4	GO:0051536	MF	iron-sulfur cluster binding	0.0345793	1	2	62	79	16762	6.84443
antiquewhite4	GO:0003724	MF	RNA helicase activity	0.0357541	1	2	63	79	16762	6.73578
antiquewhite4	GO:0004527	MF	exonuclease activity	0.0456849	1	2	72	79	16762	5.89381
antiquewhite4	GO:0008135	MF	translation factor activity, RNA binding	0.0499278	1	2	76	79	16762	5.58361
antiquewhite4	GO:0016874	MF	ligase activity	0.0258747	1	3	135	79	16762	4.71505
antiquewhite4	GO:0016853	MF	isomerase activity	0.0301453	1	3	143	79	16762	4.45127
antiquewhite4	GO:0031625	MF	ubiquitin protein ligase binding	0.0112563	1	5	286	79	16762	3.70939
antiquewhite4	GO:0016829	MF	lyase activity	0.0483204	1	3	173	79	16762	3.67937
antiquewhite4	GO:0044389	MF	ubiquitin-like protein ligase binding	0.0143079	1	5	304	79	16762	3.48976
antiquewhite4	GO:0003723	MF	RNA binding	0.0190016	1	10	1002	79	16762	2.11754
antiquewhite4	GO:0000166	MF	nucleotide binding	0.0144879	1	16	1899	79	16762	1.7877
antiquewhite4	GO:1901265	MF	nucleoside phosphate binding	0.0144879	1	16	1899	79	16762	1.7877
antiquewhite4	GO:0017076	MF	purine nucleotide binding	0.0249331	1	14	1687	79	16762	1.76081
antiquewhite4	GO:0035639	MF	purine ribonucleoside triphosphate binding	0.0379984	1	13	1616	79	16762	1.70687
antiquewhite4	GO:0032555	MF	purine ribonucleotide binding	0.048596	1	13	1676	79	16762	1.64577
antiquewhite4	GO:0036094	MF	small molecule binding	0.0254122	1	17	2199	79	16762	1.6403
antiquewhite4	GO:0005488	MF	binding	0.0135678	1	62	11141	79	16762	1.18077
bisque4	GO:0048407	MF	platelet-derived growth factor binding	1.44364e-10	3.97325e-07	6	12	131	16762	63.9771
bisque4	GO:0030021	MF	extracellular matrix structural constituent conferring compression resistance	0.000124299	0.0570168	3	13	131	16762	29.5279
bisque4	GO:0043208	MF	glycosphingolipid binding	0.00256142	0.440604	2	10	131	16762	25.5908
bisque4	GO:0030020	MF	extracellular matrix structural constituent conferring tensile strength	1.08013e-08	1.82941e-05	7	37	131	16762	24.2076
bisque4	GO:0004791	MF	thioredoxin-disulfide reductase activity	0.0447945	1	1	6	131	16762	21.3257
bisque4	GO:0070051	MF	fibrinogen binding	0.0458015	1	1	6	131	16762	21.3257
bisque4	GO:0034511	MF	U3 snoRNA binding	0.0467064	1	1	6	131	16762	21.3257
bisque4	GO:0097642	MF	calcitonin family receptor activity	0.0448173	1	1	6	131	16762	21.3257
bisque4	GO:0005201	MF	extracellular matrix structural constituent	6.33771e-18	1.39544e-13	18	131	131	16762	17.5815
bisque4	GO:0016641	MF	oxidoreductase activity, acting on the CH-NH2 group of donors, oxygen as acceptor	0.00839452	0.855697	2	18	131	16762	14.2171
bisque4	GO:0051861	MF	glycolipid binding	0.00918962	0.876664	2	19	131	16762	13.4689
bisque4	GO:0016638	MF	oxidoreductase activity, acting on the CH-NH2 group of donors	0.0112201	0.972611	2	21	131	16762	12.1861
bisque4	GO:0046625	MF	sphingolipid binding	0.0153615	1	2	25	131	16762	10.2363
bisque4	GO:0005518	MF	collagen binding	0.000137458	0.058203	5	65	131	16762	9.84263
bisque4	GO:0050840	MF	extracellular matrix binding	0.000736043	0.186278	4	54	131	16762	9.47809
bisque4	GO:0016504	MF	peptidase activator activity	0.0233632	1	2	31	131	16762	8.25511
bisque4	GO:0043394	MF	proteoglycan binding	0.0284395	1	2	34	131	16762	7.52672
bisque4	GO:0031369	MF	translation initiation factor binding	0.0310731	1	2	36	131	16762	7.10857
bisque4	GO:0008376	MF	acetylgalactosaminyltransferase activity	0.0343969	1	2	38	131	16762	6.73443
bisque4	GO:0019838	MF	growth factor binding	9.1604e-05	0.0456981	7	138	131	16762	6.49043
bisque4	GO:0046332	MF	SMAD binding	0.00355268	0.583752	4	82	131	16762	6.24167
bisque4	GO:0004867	MF	serine-type endopeptidase inhibitor activity	0.0155358	1	3	68	131	16762	5.64504
bisque4	GO:0005178	MF	integrin binding	0.00239046	0.421066	5	121	131	16762	5.28736
bisque4	GO:0005198	MF	structural molecule activity	1.07887e-09	2.37545e-06	20	495	131	16762	5.16987
bisque4	GO:0005539	MF	glycosaminoglycan binding	0.000493085	0.154207	7	182	131	16762	4.92132
bisque4	GO:0008201	MF	heparin binding	0.00384836	0.61849	5	136	131	16762	4.7042
bisque4	GO:0061134	MF	peptidase regulator activity	0.00182003	0.333944	6	167	131	16762	4.59716
bisque4	GO:0004866	MF	endopeptidase inhibitor activity	0.017511	1	4	129	131	16762	3.96757
bisque4	GO:0002020	MF	protease binding	0.0181849	1	4	131	131	16762	3.907
bisque4	GO:0061135	MF	endopeptidase regulator activity	0.0207834	1	4	136	131	16762	3.76336
bisque4	GO:0030414	MF	peptidase inhibitor activity	0.0212448	1	4	137	131	16762	3.73589
bisque4	GO:0050839	MF	cell adhesion molecule binding	0.006874	0.824743	6	219	131	16762	3.50559
bisque4	GO:1901681	MF	sulfur compound binding	0.026017	1	5	218	131	16762	2.93473
bisque4	GO:0005509	MF	calcium ion binding	0.0207399	1	9	532	131	16762	2.16464
bisque4	GO:0042802	MF	identical protein binding	0.00604262	0.824743	23	1735	131	16762	1.69622
bisque4	GO:0044877	MF	protein-containing complex binding	0.037386	1	15	1189	131	16762	1.61422
bisque4	GO:0097367	MF	carbohydrate derivative binding	0.0409341	1	22	1957	131	16762	1.43842
bisque4	GO:0005515	MF	protein binding	0.0160295	1	73	7916	131	16762	1.17997
black	GO:0001849	MF	complement component C1q complex binding	0.0140358	1	2	6	557	16762	10.0311
black	GO:0004690	MF	cyclic nucleotide-dependent protein kinase activity	0.0138367	1	2	6	557	16762	10.0311
black	GO:0004691	MF	cAMP-dependent protein kinase activity	0.0138367	1	2	6	557	16762	10.0311
black	GO:0008420	MF	RNA polymerase II CTD heptapeptide repeat phosphatase activity	0.0133255	1	2	6	557	16762	10.0311
black	GO:0039706	MF	co-receptor binding	0.00323867	1	3	10	557	16762	9.02801
black	GO:0015923	MF	mannosidase activity	0.00095757	1	4	15	557	16762	8.0249
black	GO:0031957	MF	very long-chain fatty acid-CoA ligase activity	0.0233565	1	2	8	557	16762	7.52334
black	GO:0034483	MF	heparan sulfate sulfotransferase activity	0.00542941	1	3	12	557	16762	7.52334
black	GO:0001846	MF	opsonin binding	0.00702277	1	3	13	557	16762	6.94462
black	GO:0070097	MF	delta-catenin binding	0.0311466	1	2	9	557	16762	6.68741
black	GO:0004169	MF	dolichyl-phosphate-mannose-protein mannosyltransferase activity	0.031186	1	2	9	557	16762	6.68741
black	GO:0005078	MF	MAP-kinase scaffold activity	0.0302358	1	2	9	557	16762	6.68741
black	GO:0015924	MF	mannosyl-oligosaccharide mannosidase activity	0.0301269	1	2	9	557	16762	6.68741
black	GO:0005521	MF	lamin binding	0.00810054	1	3	14	557	16762	6.44858
black	GO:0004559	MF	alpha-mannosidase activity	0.00854125	1	3	14	557	16762	6.44858
black	GO:0070403	MF	NAD+ binding	0.00843376	1	3	14	557	16762	6.44858
black	GO:0004955	MF	prostaglandin receptor activity	0.0380708	1	2	10	557	16762	6.01867
black	GO:0061575	MF	cyclin-dependent protein serine/threonine kinase activator activity	0.0369157	1	2	10	557	16762	6.01867
black	GO:0034237	MF	protein kinase A regulatory subunit binding	0.0037346	1	4	21	557	16762	5.73207
black	GO:0034979	MF	NAD-dependent protein deacetylase activity	0.012518	1	3	16	557	16762	5.6425
black	GO:0004467	MF	long-chain fatty acid-CoA ligase activity	0.0423279	1	2	11	557	16762	5.47152
black	GO:0004954	MF	prostanoid receptor activity	0.0456762	1	2	11	557	16762	5.47152
black	GO:0005537	MF	mannose binding	0.0176708	1	3	18	557	16762	5.01556
black	GO:0001848	MF	complement binding	0.023518	1	3	20	557	16762	4.514
black	GO:0050998	MF	nitric-oxide synthase binding	0.0229891	1	3	20	557	16762	4.514
black	GO:0019213	MF	deacetylase activity	0.00697781	1	5	39	557	16762	3.85812
black	GO:0005112	MF	Notch binding	0.0384136	1	3	24	557	16762	3.76167
black	GO:0061733	MF	peptide-lysine-N-acetyltransferase activity	0.000886826	1	8	65	557	16762	3.7038
black	GO:0035064	MF	methylated histone binding	0.0022898	1	7	59	557	16762	3.5704
black	GO:0140034	MF	methylation-dependent protein binding	0.0022898	1	7	59	557	16762	3.5704
black	GO:0140457	MF	protein demethylase activity	0.0466346	1	3	26	557	16762	3.47231
black	GO:0032452	MF	histone demethylase activity	0.0466346	1	3	26	557	16762	3.47231
black	GO:0003707	MF	steroid hormone receptor activity	0.0115317	1	5	44	557	16762	3.4197
black	GO:0004402	MF	histone acetyltransferase activity	0.0033505	1	7	63	557	16762	3.34371
black	GO:0034212	MF	peptide N-acetyltransferase activity	0.0019038	1	8	73	557	16762	3.2979
black	GO:0008146	MF	sulfotransferase activity	0.0288992	1	4	38	557	16762	3.16772
black	GO:0051018	MF	protein kinase A binding	0.0178809	1	5	49	557	16762	3.07075
black	GO:0016782	MF	transferase activity, transferring sulfur-containing groups	0.0259609	1	5	54	557	16762	2.78642
black	GO:0045309	MF	protein phosphorylated amino acid binding	0.0258711	1	5	54	557	16762	2.78642
black	GO:0008080	MF	N-acetyltransferase activity	0.00614111	1	8	88	557	16762	2.73576
black	GO:0036459	MF	thiol-dependent ubiquitinyl hydrolase activity	0.0212858	1	7	89	557	16762	2.36689
black	GO:0101005	MF	ubiquitinyl hydrolase activity	0.0224413	1	7	90	557	16762	2.34059
black	GO:0016410	MF	N-acyltransferase activity	0.0168168	1	8	105	557	16762	2.29283
black	GO:0016407	MF	acetyltransferase activity	0.0204666	1	8	109	557	16762	2.20869
black	GO:0016798	MF	hydrolase activity, acting on glycosyl bonds	0.0223018	1	8	110	557	16762	2.18861
black	GO:0005088	MF	Ras guanyl-nucleotide exchange factor activity	0.0154289	1	9	124	557	16762	2.1842
black	GO:0047485	MF	protein N-terminus binding	0.0175356	1	9	127	557	16762	2.1326
black	GO:0019783	MF	ubiquitin-like protein-specific protease activity	0.0352293	1	7	99	557	16762	2.12781
black	GO:0016747	MF	transferase activity, transferring acyl groups other than amino-acyl groups	0.00656844	1	14	211	557	16762	1.99672
black	GO:0017137	MF	Rab GTPase binding	0.0289351	1	10	160	557	16762	1.88083
black	GO:0016746	MF	transferase activity, transferring acyl groups	0.00887505	1	15	241	557	16762	1.87303
black	GO:0005096	MF	GTPase activator activity	0.0141469	1	14	231	557	16762	1.82384
black	GO:0001217	MF	DNA-binding transcription repressor activity	0.017408	1	13	215	557	16762	1.8196
black	GO:0001227	MF	DNA-binding transcription repressor activity, RNA polymerase II-specific	0.017408	1	13	215	557	16762	1.8196
black	GO:0008234	MF	cysteine-type peptidase activity	0.044447	1	9	149	557	16762	1.81772
black	GO:0005085	MF	guanyl-nucleotide exchange factor activity	0.0399464	1	11	193	557	16762	1.71517
black	GO:0008047	MF	enzyme activator activity	0.0040567	1	24	426	557	16762	1.6954
black	GO:0030695	MF	GTPase regulator activity	0.0251694	1	14	249	557	16762	1.692
black	GO:0017016	MF	Ras GTPase binding	0.00773999	1	22	401	557	16762	1.65101
black	GO:0031267	MF	small GTPase binding	0.0114375	1	22	416	557	16762	1.59148
black	GO:0060589	MF	nucleoside-triphosphatase regulator activity	0.0372237	1	15	287	557	16762	1.57282
black	GO:0051020	MF	GTPase binding	0.00977146	1	26	509	557	16762	1.53719
black	GO:0003700	MF	DNA-binding transcription factor activity	0.0014625	1	42	833	557	16762	1.51731
black	GO:0140110	MF	transcription regulator activity	0.000884287	1	56	1171	557	16762	1.43914
black	GO:0003712	MF	transcription coregulator activity	0.0498166	1	20	430	557	16762	1.39969
black	GO:0000981	MF	DNA-binding transcription factor activity, RNA polymerase II-specific	0.0388105	1	28	633	557	16762	1.33114
black	GO:0003677	MF	DNA binding	0.0165637	1	70	1747	557	16762	1.2058
black	GO:0046872	MF	metal ion binding	0.00588327	1	122	3167	557	16762	1.15926
black	GO:0019899	MF	enzyme binding	0.0262632	1	84	2196	557	16762	1.15111
black	GO:0043169	MF	cation binding	0.00918126	1	123	3241	557	16762	1.14208
black	GO:0043167	MF	ion binding	0.0239031	1	176	4969	557	16762	1.06589
blue	GO:0001730	MF	2'-5'-oligoadenylate synthetase activity	2.11705e-08	4.31604e-06	6	6	917	16762	18.2792
blue	GO:0046977	MF	TAP binding	1.51656e-10	4.28097e-08	9	11	917	16762	14.9557
blue	GO:0062061	MF	TAP complex binding	3.6362e-08	7.08512e-06	7	9	917	16762	14.2171
blue	GO:0015183	MF	L-aspartate transmembrane transporter activity	0.000105818	0.00999959	4	6	917	16762	12.1861
blue	GO:0030881	MF	beta-2-microglobulin binding	3.03564e-07	4.95102e-05	7	11	917	16762	11.6322
blue	GO:0042610	MF	CD8 receptor binding	3.03563e-07	4.95102e-05	7	11	917	16762	11.6322
blue	GO:0042605	MF	peptide antigen binding	1.95118e-15	1.07403e-12	17	28	917	16762	11.0981
blue	GO:0045236	MF	CXCR chemokine receptor binding	0.00259269	0.144888	3	6	917	16762	9.13959
blue	GO:0042608	MF	T cell receptor binding	4.91105e-06	0.000639832	7	15	917	16762	8.53028
blue	GO:0031730	MF	CCR5 chemokine receptor binding	0.00435975	0.205554	3	7	917	16762	7.83393
blue	GO:0015556	MF	C4-dicarboxylate transmembrane transporter activity	0.000234071	0.0195821	5	12	917	16762	7.61632
blue	GO:0003823	MF	antigen binding	6.88783e-13	2.75739e-10	19	47	917	16762	7.38945
blue	GO:0042288	MF	MHC class I protein binding	2.11209e-05	0.00233688	7	18	917	16762	7.10857
blue	GO:0035325	MF	Toll-like receptor binding	0.000363885	0.0286143	5	13	917	16762	7.03045
blue	GO:0003950	MF	NAD+ ADP-ribosyltransferase activity	9.56164e-06	0.00115675	8	22	917	16762	6.64697
blue	GO:1990404	MF	protein ADP-ribosylase activity	0.000541561	0.0400138	5	14	917	16762	6.52828
blue	GO:0043546	MF	molybdopterin cofactor binding	0.0361631	0.826836	2	6	917	16762	6.09306
blue	GO:0015141	MF	succinate transmembrane transporter activity	0.0361632	0.826836	2	6	917	16762	6.09306
blue	GO:0019763	MF	immunoglobulin receptor activity	0.0361629	0.826836	2	6	917	16762	6.09306
blue	GO:0019864	MF	IgG binding	0.0361631	0.826836	2	6	917	16762	6.09306
blue	GO:0042500	MF	aspartic endopeptidase activity, intramembrane cleaving	0.0361629	0.826836	2	6	917	16762	6.09306
blue	GO:0097199	MF	cysteine-type endopeptidase activity involved in apoptotic signaling pathway	0.0361632	0.826836	2	6	917	16762	6.09306
blue	GO:0042301	MF	phosphate ion binding	0.00966429	0.358883	3	9	917	16762	6.09306
blue	GO:0050700	MF	CARD domain binding	0.00270499	0.145307	4	12	917	16762	6.09306
blue	GO:0070566	MF	adenylyltransferase activity	1.5881e-05	0.00179317	9	30	917	16762	5.48375
blue	GO:0016661	MF	oxidoreductase activity, acting on other nitrogenous compounds as donors	0.0488842	0.860145	2	7	917	16762	5.22262
blue	GO:1904047	MF	S-adenosyl-L-methionine binding	0.0488844	0.860145	2	7	917	16762	5.22262
blue	GO:0015180	MF	L-alanine transmembrane transporter activity	0.0488844	0.860145	2	7	917	16762	5.22262
blue	GO:0022858	MF	alanine transmembrane transporter activity	0.0488844	0.860145	2	7	917	16762	5.22262
blue	GO:0031702	MF	type 1 angiotensin receptor binding	0.0488845	0.860145	2	7	917	16762	5.22262
blue	GO:0061133	MF	endopeptidase activator activity	0.0488845	0.860145	2	7	917	16762	5.22262
blue	GO:0015172	MF	acidic amino acid transmembrane transporter activity	0.00502707	0.224064	4	14	917	16762	5.22262
blue	GO:0042287	MF	MHC protein binding	7.00529e-05	0.00679482	8	28	917	16762	5.22262
blue	GO:0008174	MF	mRNA methyltransferase activity	0.0175419	0.524071	3	11	917	16762	4.98523
blue	GO:0008009	MF	chemokine activity	1.49756e-05	0.00170846	10	37	917	16762	4.94032
blue	GO:0048020	MF	CCR chemokine receptor binding	0.000120086	0.0112994	8	30	917	16762	4.87445
blue	GO:0033130	MF	acetylcholine receptor binding	0.0224876	0.636169	3	12	917	16762	4.56979
blue	GO:0016646	MF	oxidoreductase activity, acting on the CH-NH group of donors, NAD or NADP as acceptor	0.0105369	0.380364	4	17	917	16762	4.30098
blue	GO:0005313	MF	L-glutamate transmembrane transporter activity	0.02811	0.710601	3	13	917	16762	4.21827
blue	GO:0042379	MF	chemokine receptor binding	3.79536e-05	0.00385098	11	49	917	16762	4.10349
blue	GO:0003725	MF	double-stranded RNA binding	1.64464e-07	2.85607e-05	18	81	917	16762	4.06204
blue	GO:0016763	MF	transferase activity, transferring pentosyl groups	0.000165965	0.0146755	10	48	917	16762	3.80816
blue	GO:0051400	MF	BH domain binding	0.041364	0.860145	3	15	917	16762	3.65583
blue	GO:0044183	MF	protein folding chaperone	0.0189248	0.557069	4	20	917	16762	3.65583
blue	GO:0008200	MF	ion channel inhibitor activity	0.00422683	0.201879	6	30	917	16762	3.65583
blue	GO:0016248	MF	channel inhibitor activity	0.00501171	0.224064	6	31	917	16762	3.5379
blue	GO:0015035	MF	protein disulfide oxidoreductase activity	0.0489701	0.860145	3	16	917	16762	3.42734
blue	GO:0048027	MF	mRNA 5'-UTR binding	0.0351655	0.826836	4	24	917	16762	3.04653
blue	GO:0005310	MF	dicarboxylic acid transmembrane transporter activity	0.0248506	0.663594	5	32	917	16762	2.85612
blue	GO:0016645	MF	oxidoreductase activity, acting on the CH-NH group of donors	0.045565	0.860145	4	26	917	16762	2.81218
blue	GO:0046915	MF	transition metal ion transmembrane transporter activity	0.0280572	0.710601	5	33	917	16762	2.76957
blue	GO:0016875	MF	ligase activity, forming carbon-oxygen bonds	0.019617	0.573609	6	41	917	16762	2.675
blue	GO:0004812	MF	aminoacyl-tRNA ligase activity	0.019617	0.573609	6	41	917	16762	2.675
blue	GO:0000049	MF	tRNA binding	0.0107086	0.383386	8	58	917	16762	2.52126
blue	GO:0008173	MF	RNA methyltransferase activity	0.0143372	0.472571	8	61	917	16762	2.39727
blue	GO:0140375	MF	immune receptor activity	0.00270071	0.145307	13	102	917	16762	2.3297
blue	GO:0016779	MF	nucleotidyltransferase activity	0.00190058	0.113714	15	122	917	16762	2.24744
blue	GO:0005507	MF	copper ion binding	0.0466936	0.860145	6	50	917	16762	2.1935
blue	GO:0004540	MF	ribonuclease activity	0.0140659	0.466855	11	98	917	16762	2.05174
blue	GO:0003924	MF	GTPase activity	0.000132833	0.0123929	30	275	917	16762	1.99409
blue	GO:0051117	MF	ATPase binding	0.0347955	0.826459	9	85	917	16762	1.93544
blue	GO:0004896	MF	cytokine receptor activity	0.0420881	0.860145	9	88	917	16762	1.86946
blue	GO:0044389	MF	ubiquitin-like protein ligase binding	0.000346179	0.0276166	31	304	917	16762	1.86399
blue	GO:0005126	MF	cytokine receptor binding	0.0027768	0.145307	24	246	917	16762	1.78333
blue	GO:0140101	MF	catalytic activity, acting on a tRNA	0.0361279	0.826836	11	113	917	16762	1.77939
blue	GO:0005125	MF	cytokine activity	0.0170198	0.517599	15	155	917	16762	1.76895
blue	GO:0019955	MF	cytokine binding	0.0424759	0.860145	11	116	917	16762	1.73337
blue	GO:0140098	MF	catalytic activity, acting on RNA	0.00217241	0.127213	31	340	917	16762	1.66663
blue	GO:0031625	MF	ubiquitin protein ligase binding	0.00930286	0.350737	25	286	917	16762	1.59783
blue	GO:0042277	MF	peptide binding	0.0213669	0.620656	21	247	917	16762	1.5541
blue	GO:0000978	MF	RNA polymerase II cis-regulatory region sequence-specific DNA binding	0.00446338	0.209095	39	477	917	16762	1.49452
blue	GO:0001664	MF	G protein-coupled receptor binding	0.0352414	0.826836	20	245	917	16762	1.49218
blue	GO:0000987	MF	cis-regulatory region sequence-specific DNA binding	0.00715379	0.294415	39	491	917	16762	1.45191
blue	GO:0004842	MF	ubiquitin-protein transferase activity	0.0244314	0.663594	28	358	917	16762	1.42966
blue	GO:0003723	MF	RNA binding	0.00129977	0.0829517	75	1002	917	16762	1.3682
blue	GO:0042802	MF	identical protein binding	2.99461e-05	0.00323213	129	1735	917	16762	1.35909
blue	GO:0019787	MF	ubiquitin-like protein transferase activity	0.0442858	0.860145	28	378	917	16762	1.35401
blue	GO:0017111	MF	nucleoside-triphosphatase activity	0.00790703	0.314536	53	716	917	16762	1.35307
blue	GO:0042803	MF	protein homodimerization activity	0.00453365	0.210595	63	856	917	16762	1.34531
blue	GO:0003712	MF	transcription coregulator activity	0.0484732	0.860145	31	430	917	16762	1.3178
blue	GO:0016462	MF	pyrophosphatase activity	0.0119958	0.419244	55	765	917	16762	1.31419
blue	GO:0016817	MF	hydrolase activity, acting on acid anhydrides	0.0128889	0.441348	55	768	917	16762	1.30906
blue	GO:0016818	MF	hydrolase activity, acting on acid anhydrides, in phosphorus-containing anhydrides	0.0128889	0.441348	55	768	917	16762	1.30906
blue	GO:0046914	MF	transition metal ion binding	0.0407144	0.860145	56	839	917	16762	1.22006
blue	GO:0046983	MF	protein dimerization activity	0.0282011	0.712078	82	1263	917	16762	1.18677
blue	GO:0005102	MF	signaling receptor binding	0.0283383	0.714722	88	1367	917	16762	1.17671
blue	GO:0035639	MF	purine ribonucleoside triphosphate binding	0.0496515	0.860145	100	1616	917	16762	1.13114
blue	GO:0016787	MF	hydrolase activity	0.0288101	0.724134	134	2176	917	16762	1.12565
blue	GO:0097367	MF	carbohydrate derivative binding	0.0418459	0.860145	120	1957	917	16762	1.12085
blue	GO:0003824	MF	catalytic activity	0.0146686	0.480614	297	5069	917	16762	1.071
blue	GO:0005515	MF	protein binding	0.0133724	0.448832	450	7916	917	16762	1.03911
blue	GO:0005488	MF	binding	0.00252308	0.144888	626	11141	917	16762	1.02709
brown	GO:0070990	MF	snRNP binding	0.000302263	0.0279631	4	10	616	16762	10.8844
brown	GO:0004298	MF	threonine-type endopeptidase activity	2.45063e-07	6.27417e-05	8	20	616	16762	10.8844
brown	GO:0070003	MF	threonine-type peptidase activity	2.45063e-07	6.27417e-05	8	20	616	16762	10.8844
brown	GO:0050815	MF	phosphoserine residue binding	0.0023199	0.135131	3	8	616	16762	10.2041
brown	GO:1990446	MF	U1 snRNP binding	0.0023199	0.135131	3	8	616	16762	10.2041
brown	GO:0008641	MF	ubiquitin-like modifier activating enzyme activity	0.000461388	0.0389227	4	11	616	16762	9.89492
brown	GO:0046933	MF	proton-transporting ATP synthase activity, rotational mechanism	9.41577e-05	0.0105774	5	14	616	16762	9.71823
brown	GO:0008379	MF	thioredoxin peroxidase activity	0.01788	0.634969	2	6	616	16762	9.07035
brown	GO:0003720	MF	telomerase activity	0.01788	0.634969	2	6	616	16762	9.07035
brown	GO:0003964	MF	RNA-directed DNA polymerase activity	0.01788	0.634969	2	6	616	16762	9.07035
brown	GO:0015038	MF	glutathione disulfide oxidoreductase activity	0.01788	0.634969	2	6	616	16762	9.07035
brown	GO:0019788	MF	NEDD8 transferase activity	0.01788	0.634969	2	6	616	16762	9.07035
brown	GO:0015252	MF	proton channel activity	0.000193396	0.0190098	5	16	616	16762	8.50345
brown	GO:0051920	MF	peroxiredoxin activity	0.00470832	0.238317	3	10	616	16762	8.16331
brown	GO:0005049	MF	nuclear export signal receptor activity	0.00470832	0.238317	3	10	616	16762	8.16331
brown	GO:0016679	MF	oxidoreductase activity, acting on diphenols and related substances as donors	0.024436	0.78316	2	7	616	16762	7.77458
brown	GO:0032552	MF	deoxyribonucleotide binding	0.024436	0.78316	2	7	616	16762	7.77458
brown	GO:0008121	MF	ubiquinol-cytochrome-c reductase activity	0.024436	0.78316	2	7	616	16762	7.77458
brown	GO:0016681	MF	oxidoreductase activity, acting on diphenols and related substances as donors, cytochrome as acceptor	0.024436	0.78316	2	7	616	16762	7.77458
brown	GO:0016842	MF	amidine-lyase activity	0.024436	0.78316	2	7	616	16762	7.77458
brown	GO:0031821	MF	G protein-coupled serotonin receptor binding	0.024436	0.78316	2	7	616	16762	7.77458
brown	GO:0015037	MF	peptide disulfide oxidoreductase activity	0.00128305	0.0873809	4	14	616	16762	7.77458
brown	GO:0015002	MF	heme-copper terminal oxidase activity	7.56423e-05	0.00890637	6	21	616	16762	7.77458
brown	GO:0004129	MF	cytochrome-c oxidase activity	7.56423e-05	0.00890637	6	21	616	16762	7.77458
brown	GO:0016676	MF	oxidoreductase activity, acting on a heme group of donors, oxygen as acceptor	7.56423e-05	0.00890637	6	21	616	16762	7.77458
brown	GO:0016675	MF	oxidoreductase activity, acting on a heme group of donors	0.000100836	0.0112132	6	22	616	16762	7.42119
brown	GO:0030235	MF	nitric-oxide synthase regulator activity	0.031808	0.809168	2	8	616	16762	6.80276
brown	GO:0016884	MF	carbon-nitrogen ligase activity, with glutamine as amido-N-donor	0.031808	0.809168	2	8	616	16762	6.80276
brown	GO:0004549	MF	tRNA-specific ribonuclease activity	0.00220191	0.133884	4	16	616	16762	6.80276
brown	GO:0015035	MF	protein disulfide oxidoreductase activity	0.00220191	0.133884	4	16	616	16762	6.80276
brown	GO:0003954	MF	NADH dehydrogenase activity	4.85832e-05	0.00629238	7	28	616	16762	6.80276
brown	GO:0008137	MF	NADH dehydrogenase (ubiquinone) activity	0.000218132	0.021065	6	25	616	16762	6.53065
brown	GO:0050136	MF	NADH dehydrogenase (quinone) activity	0.000218132	0.021065	6	25	616	16762	6.53065
brown	GO:0140318	MF	protein transporter activity	0.0103472	0.438971	3	13	616	16762	6.27947
brown	GO:0008320	MF	protein transmembrane transporter activity	0.0103472	0.438971	3	13	616	16762	6.27947
brown	GO:0009982	MF	pseudouridine synthase activity	0.0103472	0.438971	3	13	616	16762	6.27947
brown	GO:0009055	MF	electron transfer activity	1.00782e-08	4.10928e-06	15	66	616	16762	6.18433
brown	GO:0001055	MF	RNA polymerase II activity	0.0399284	0.857701	2	9	616	16762	6.0469
brown	GO:0003988	MF	acetyl-CoA C-acyltransferase activity	0.0399284	0.857701	2	9	616	16762	6.0469
brown	GO:0102991	MF	myristoyl-CoA hydrolase activity	0.0399284	0.857701	2	9	616	16762	6.0469
brown	GO:0042288	MF	MHC class I protein binding	0.0034949	0.19432	4	18	616	16762	6.0469
brown	GO:0015036	MF	disulfide oxidoreductase activity	3.52194e-05	0.00513551	8	36	616	16762	6.0469
brown	GO:0140142	MF	nucleocytoplasmic carrier activity	0.000517144	0.042646	6	29	616	16762	5.62987
brown	GO:0071933	MF	Arp2/3 complex binding	0.0487334	0.984062	2	10	616	16762	5.44221
brown	GO:0016668	MF	oxidoreductase activity, acting on a sulfur group of donors, NAD(P) as acceptor	0.0487334	0.984062	2	10	616	16762	5.44221
brown	GO:0033204	MF	ribonuclease P RNA binding	0.0487334	0.984062	2	10	616	16762	5.44221
brown	GO:0061578	MF	Lys63-specific deubiquitinase activity	0.0487334	0.984062	2	10	616	16762	5.44221
brown	GO:0005092	MF	GDP-dissociation inhibitor activity	0.0155992	0.598367	3	15	616	16762	5.44221
brown	GO:0016877	MF	ligase activity, forming carbon-sulfur bonds	0.000753704	0.0568324	6	31	616	16762	5.26665
brown	GO:0022884	MF	macromolecule transmembrane transporter activity	0.0186909	0.656356	3	16	616	16762	5.10207
brown	GO:0043422	MF	protein kinase B binding	0.0220966	0.743917	3	17	616	16762	4.80195
brown	GO:0003743	MF	translation initiation factor activity	0.000220686	0.0211866	8	46	616	16762	4.73235
brown	GO:0009678	MF	pyrophosphate hydrolysis-driven proton transmembrane transporter activity	0.00356071	0.195999	5	29	616	16762	4.69156
brown	GO:0016655	MF	oxidoreductase activity, acting on NAD(P)H, quinone or similar compound as acceptor	0.00146944	0.0965797	6	35	616	16762	4.66475
brown	GO:0003735	MF	structural constituent of ribosome	7.60799e-11	6.4428e-08	25	146	616	16762	4.65942
brown	GO:0003746	MF	translation elongation factor activity	0.0258169	0.806293	3	18	616	16762	4.53517
brown	GO:0008553	MF	proton-exporting ATPase activity, phosphorylative mechanism	0.0258169	0.806293	3	18	616	16762	4.53517
brown	GO:0070182	MF	DNA polymerase binding	0.0258169	0.806293	3	18	616	16762	4.53517
brown	GO:1904680	MF	peptide transmembrane transporter activity	0.0102198	0.438971	4	24	616	16762	4.53517
brown	GO:0031369	MF	translation initiation factor binding	0.00171008	0.108509	6	36	616	16762	4.53517
brown	GO:0051082	MF	unfolded protein binding	1.02855e-06	0.000213647	15	92	616	16762	4.43658
brown	GO:0061608	MF	nuclear import signal receptor activity	0.029851	0.809168	3	19	616	16762	4.29648
brown	GO:0034458	MF	3'-5' RNA helicase activity	0.029851	0.809168	3	19	616	16762	4.29648
brown	GO:0016667	MF	oxidoreductase activity, acting on a sulfur group of donors	0.000459337	0.0389227	8	51	616	16762	4.2684
brown	GO:0016776	MF	phosphotransferase activity, phosphate group as acceptor	0.00109159	0.077531	7	45	616	16762	4.23283
brown	GO:0015078	MF	proton transmembrane transporter activity	8.85085e-07	0.000189202	16	103	616	16762	4.22696
brown	GO:0032794	MF	GTPase activating protein binding	0.0341969	0.809168	3	20	616	16762	4.08166
brown	GO:0044769	MF	ATPase activity, coupled to transmembrane movement of ions, rotational mechanism	0.0341969	0.809168	3	20	616	16762	4.08166
brown	GO:0046961	MF	proton-transporting ATPase activity, rotational mechanism	0.0341969	0.809168	3	20	616	16762	4.08166
brown	GO:0003755	MF	peptidyl-prolyl cis-trans isomerase activity	0.00719114	0.344205	5	34	616	16762	4.00162
brown	GO:0008135	MF	translation factor activity, RNA binding	8.7875e-05	0.01013	11	76	616	16762	3.93844
brown	GO:0048156	MF	tau protein binding	0.0388511	0.854568	3	21	616	16762	3.88729
brown	GO:0042287	MF	MHC protein binding	0.0175744	0.634969	4	28	616	16762	3.88729
brown	GO:0008536	MF	Ran GTPase binding	0.00814475	0.365201	5	35	616	16762	3.88729
brown	GO:0061631	MF	ubiquitin conjugating enzyme activity	0.00814475	0.365201	5	35	616	16762	3.88729
brown	GO:0016874	MF	ligase activity	4.15831e-07	9.74017e-05	19	135	616	16762	3.8297
brown	GO:0016859	MF	cis-trans isomerase activity	0.0103081	0.438971	5	37	616	16762	3.67717
brown	GO:0061650	MF	ubiquitin-like protein conjugating enzyme activity	0.0103081	0.438971	5	37	616	16762	3.67717
brown	GO:0043021	MF	ribonucleoprotein complex binding	1.02424e-06	0.000213647	19	143	616	16762	3.61545
brown	GO:0140101	MF	catalytic activity, acting on a tRNA	1.40765e-05	0.00229583	15	113	616	16762	3.61208
brown	GO:0016651	MF	oxidoreductase activity, acting on NAD(P)H	0.000404424	0.036051	10	76	616	16762	3.5804
brown	GO:0090079	MF	translation regulator activity, nucleic acid binding	0.000147023	0.0154888	12	94	616	16762	3.47375
brown	GO:0016875	MF	ligase activity, forming carbon-oxygen bonds	0.0157502	0.599981	5	41	616	16762	3.31842
brown	GO:0016879	MF	ligase activity, forming carbon-nitrogen bonds	0.0157502	0.599981	5	41	616	16762	3.31842
brown	GO:0004812	MF	aminoacyl-tRNA ligase activity	0.0157502	0.599981	5	41	616	16762	3.31842
brown	GO:0000993	MF	RNA polymerase II complex binding	0.0403497	0.865905	4	36	616	16762	3.02345
brown	GO:0019829	MF	ATPase-coupled cation transmembrane transporter activity	0.0228331	0.765206	5	45	616	16762	3.02345
brown	GO:0042887	MF	amide transmembrane transporter activity	0.0439911	0.923351	4	37	616	16762	2.94173
brown	GO:0043531	MF	ADP binding	0.0439911	0.923351	4	37	616	16762	2.94173
brown	GO:0042625	MF	ATPase-coupled ion transmembrane transporter activity	0.0270381	0.809168	5	47	616	16762	2.89479
brown	GO:0045182	MF	translation regulator activity	0.000613422	0.0485839	13	125	616	16762	2.82995
brown	GO:0016765	MF	transferase activity, transferring alkyl or aryl (other than methyl) groups	0.0182136	0.645775	6	58	616	16762	2.81494
brown	GO:0019003	MF	GDP binding	0.0142889	0.564834	7	71	616	16762	2.68278
brown	GO:0051540	MF	metal cluster binding	0.0245306	0.783911	6	62	616	16762	2.63333
brown	GO:0051536	MF	iron-sulfur cluster binding	0.0245306	0.783911	6	62	616	16762	2.63333
brown	GO:0004222	MF	metalloendopeptidase activity	0.0135697	0.540783	8	87	616	16762	2.50216
brown	GO:0004521	MF	endoribonuclease activity	0.0485891	0.984062	5	55	616	16762	2.47373
brown	GO:0016278	MF	lysine N-methyltransferase activity	0.0485891	0.984062	5	55	616	16762	2.47373
brown	GO:0016279	MF	protein-lysine N-methyltransferase activity	0.0485891	0.984062	5	55	616	16762	2.47373
brown	GO:0016209	MF	antioxidant activity	0.0321647	0.809168	6	66	616	16762	2.47373
brown	GO:0070491	MF	repressing transcription factor binding	0.0365019	0.812637	6	68	616	16762	2.40097
brown	GO:0002039	MF	p53 binding	0.0411969	0.878947	6	70	616	16762	2.33237
brown	GO:0016853	MF	isomerase activity	0.00590295	0.290114	12	143	616	16762	2.28344
brown	GO:0004540	MF	ribonuclease activity	0.0259684	0.806448	8	98	616	16762	2.22131
brown	GO:0019783	MF	ubiquitin-like protein-specific protease activity	0.0273906	0.809168	8	99	616	16762	2.19887
brown	GO:0005198	MF	structural molecule activity	1.96306e-06	0.000385917	40	495	616	16762	2.19887
brown	GO:0003727	MF	single-stranded RNA binding	0.0405932	0.870284	7	88	616	16762	2.16451
brown	GO:0140098	MF	catalytic activity, acting on RNA	0.00012253	0.0130965	27	340	616	16762	2.16088
brown	GO:0008237	MF	metallopeptidase activity	0.00944415	0.413402	12	152	616	16762	2.14824
brown	GO:0004175	MF	endopeptidase activity	0.000420432	0.0372533	25	329	616	16762	2.06771
brown	GO:0031072	MF	heat shock protein binding	0.0219858	0.743917	10	132	616	16762	2.06144
brown	GO:0019903	MF	protein phosphatase binding	0.013195	0.531127	12	159	616	16762	2.05366
brown	GO:0000287	MF	magnesium ion binding	0.0168375	0.632641	13	184	616	16762	1.92252
brown	GO:0008233	MF	peptidase activity	0.000121607	0.0130611	36	512	616	16762	1.91328
brown	GO:0031625	MF	ubiquitin protein ligase binding	0.00399937	0.208668	20	286	616	16762	1.90287
brown	GO:0019902	MF	phosphatase binding	0.0175893	0.634969	14	205	616	16762	1.85831
brown	GO:0070011	MF	peptidase activity, acting on L-amino acid peptides	0.00043208	0.0379025	33	486	616	16762	1.84766
brown	GO:0016491	MF	oxidoreductase activity	5.55111e-05	0.00701193	44	651	616	16762	1.83915
brown	GO:0003723	MF	RNA binding	4.49609e-07	0.00010312	67	1002	616	16762	1.8195
brown	GO:0044389	MF	ubiquitin-like protein ligase binding	0.00775372	0.354194	20	304	616	16762	1.7902
brown	GO:0015077	MF	monovalent inorganic cation transmembrane transporter activity	0.0236862	0.78316	18	297	616	16762	1.64915
brown	GO:0032550	MF	purine ribonucleoside binding	0.0236018	0.78316	20	340	616	16762	1.60065
brown	GO:0001883	MF	purine nucleoside binding	0.0256092	0.806293	20	343	616	16762	1.58665
brown	GO:0032549	MF	ribonucleoside binding	0.0256092	0.806293	20	343	616	16762	1.58665
brown	GO:0001882	MF	nucleoside binding	0.0315976	0.809168	20	351	616	16762	1.55049
brown	GO:0019001	MF	guanyl nucleotide binding	0.0324142	0.809168	20	352	616	16762	1.54608
brown	GO:0032561	MF	guanyl ribonucleotide binding	0.0324142	0.809168	20	352	616	16762	1.54608
brown	GO:0000166	MF	nucleotide binding	7.28509e-05	0.0087652	100	1899	616	16762	1.43291
brown	GO:1901265	MF	nucleoside phosphate binding	7.28509e-05	0.0087652	100	1899	616	16762	1.43291
brown	GO:0005524	MF	ATP binding	0.00275529	0.158811	67	1313	616	16762	1.38853
brown	GO:0030554	MF	adenyl nucleotide binding	0.0023948	0.139126	70	1376	616	16762	1.38428
brown	GO:0016787	MF	hydrolase activity	0.000158221	0.0163611	110	2176	616	16762	1.37556
brown	GO:0032559	MF	adenyl ribonucleotide binding	0.00305519	0.174272	69	1366	616	16762	1.3745
brown	GO:0019904	MF	protein domain specific binding	0.0251432	0.801161	38	753	616	16762	1.3732
brown	GO:0017076	MF	purine nucleotide binding	0.00108226	0.0771168	85	1687	616	16762	1.37104
brown	GO:0003824	MF	catalytic activity	1.33699e-10	1.0452e-07	255	5069	616	16762	1.36887
brown	GO:0035639	MF	purine ribonucleoside triphosphate binding	0.00165364	0.105536	81	1616	616	16762	1.36392
brown	GO:0032555	MF	purine ribonucleotide binding	0.00135391	0.0897901	84	1676	616	16762	1.3638
brown	GO:0032553	MF	ribonucleotide binding	0.00172002	0.108826	84	1690	616	16762	1.3525
brown	GO:0036094	MF	small molecule binding	0.000361727	0.0330477	109	2199	616	16762	1.3488
brown	GO:0044877	MF	protein-containing complex binding	0.0185583	0.655886	57	1189	616	16762	1.30448
brown	GO:0140096	MF	catalytic activity, acting on a protein	0.00436485	0.224545	92	1944	616	16762	1.28777
brown	GO:0008144	MF	drug binding	0.0175749	0.634969	70	1503	616	16762	1.26731
brown	GO:0097367	MF	carbohydrate derivative binding	0.0139844	0.55379	89	1957	616	16762	1.2375
brown	GO:0019899	MF	enzyme binding	0.0162781	0.614772	98	2196	616	16762	1.21434
brown	GO:0042802	MF	identical protein binding	0.0468893	0.976734	76	1735	616	16762	1.19195
brown	GO:0043168	MF	anion binding	0.0473982	0.98084	105	2480	616	16762	1.15208
brown	GO:1901363	MF	heterocyclic compound binding	0.0337087	0.809168	182	4460	616	16762	1.11041
brown	GO:0097159	MF	organic cyclic compound binding	0.0376905	0.83404	184	4528	616	16762	1.10575
brown4	GO:0005247	MF	voltage-gated chloride channel activity	0.0035726	1	2	11	144	16762	21.1641
brown4	GO:0015245	MF	fatty acid transmembrane transporter activity	0.0489791	1	1	6	144	16762	19.4005
brown4	GO:0071253	MF	connexin binding	0.0479926	1	1	6	144	16762	19.4005
brown4	GO:0070051	MF	fibrinogen binding	0.0497796	1	1	6	144	16762	19.4005
brown4	GO:0004749	MF	ribose phosphate diphosphokinase activity	0.0494718	1	1	6	144	16762	19.4005
brown4	GO:0019958	MF	C-X-C chemokine binding	0.0494818	1	1	6	144	16762	19.4005
brown4	GO:0038064	MF	collagen receptor activity	0.0489742	1	1	6	144	16762	19.4005
brown4	GO:0038132	MF	neuregulin binding	0.0491016	1	1	6	144	16762	19.4005
brown4	GO:0047631	MF	ADP-ribose diphosphatase activity	0.0489182	1	1	6	144	16762	19.4005
brown4	GO:0008308	MF	voltage-gated anion channel activity	0.00672399	1	2	15	144	16762	15.5204
brown4	GO:0005520	MF	insulin-like growth factor binding	0.00143545	1	3	27	144	16762	12.9336
brown4	GO:0140303	MF	intramembrane lipid transporter activity	0.0130981	1	2	21	144	16762	11.086
brown4	GO:0001530	MF	lipopolysaccharide binding	0.0155057	1	2	23	144	16762	10.122
brown4	GO:0001968	MF	fibronectin binding	0.022391	1	2	28	144	16762	8.31448
brown4	GO:0030291	MF	protein serine/threonine kinase inhibitor activity	0.0242414	1	2	29	144	16762	8.02778
brown4	GO:0019956	MF	chemokine binding	0.0261681	1	2	30	144	16762	7.76019
brown4	GO:0030507	MF	spectrin binding	0.0272856	1	2	31	144	16762	7.50986
brown4	GO:0035035	MF	histone acetyltransferase binding	0.0274058	1	2	31	144	16762	7.50986
brown4	GO:0008536	MF	Ran GTPase binding	0.0347529	1	2	35	144	16762	6.65159
brown4	GO:0019905	MF	syntaxin binding	0.00390718	1	4	77	144	16762	6.0469
brown4	GO:0005080	MF	protein kinase C binding	0.0137436	1	3	60	144	16762	5.82014
brown4	GO:0016860	MF	intramolecular oxidoreductase activity	0.0476147	1	2	42	144	16762	5.54299
brown4	GO:0048029	MF	monosaccharide binding	0.0215879	1	3	71	144	16762	4.91843
brown4	GO:0000149	MF	SNARE binding	0.0157512	1	4	115	144	16762	4.04879
brown4	GO:0005319	MF	lipid transporter activity	0.0163912	1	4	116	144	16762	4.01389
brown4	GO:0042626	MF	ATPase-coupled transmembrane transporter activity	0.0408106	1	3	91	144	16762	3.83745
brown4	GO:0015399	MF	primary active transmembrane transporter activity	0.0477787	1	3	97	144	16762	3.60009
brown4	GO:0019887	MF	protein kinase regulator activity	0.0403656	1	4	154	144	16762	3.02345
brown4	GO:0030246	MF	carbohydrate binding	0.0421283	1	5	227	144	16762	2.56394
brown4	GO:0005509	MF	calcium ion binding	0.0137926	1	10	532	144	16762	2.18802
brown4	GO:0046872	MF	metal ion binding	0.0281341	1	36	3167	144	16762	1.32318
brown4	GO:0043169	MF	cation binding	0.0383512	1	36	3241	144	16762	1.29297
brown4	GO:0043167	MF	ion binding	0.0494135	1	51	4969	144	16762	1.19472
coral1	GO:0000182	MF	rDNA binding	0.0288325	1	1	6	84	16762	33.2579
coral1	GO:0001016	MF	RNA polymerase III transcription regulatory region sequence-specific DNA binding	0.0325531	1	1	7	84	16762	28.5068
coral1	GO:0016175	MF	superoxide-generating NADPH oxidase activity	0.0329433	1	1	7	84	16762	28.5068
coral1	GO:0016176	MF	superoxide-generating NADPH oxidase activator activity	0.0344741	1	1	7	84	16762	28.5068
coral1	GO:0035673	MF	oligopeptide transmembrane transporter activity	0.0296946	1	1	7	84	16762	28.5068
coral1	GO:0038036	MF	sphingosine-1-phosphate receptor activity	0.0314753	1	1	7	84	16762	28.5068
coral1	GO:0001055	MF	RNA polymerase II activity	0.0426982	1	1	9	84	16762	22.172
coral1	GO:0016670	MF	oxidoreductase activity, acting on a sulfur group of donors, oxygen as acceptor	0.0444234	1	1	9	84	16762	22.172
coral1	GO:0052650	MF	NADP-retinol dehydrogenase activity	0.0426534	1	1	9	84	16762	22.172
coral1	GO:0072542	MF	protein phosphatase activator activity	0.0423414	1	1	9	84	16762	22.172
coral1	GO:0098599	MF	palmitoyl hydrolase activity	0.0468238	1	1	10	84	16762	19.9548
coral1	GO:0008474	MF	palmitoyl-(protein) hydrolase activity	0.0468238	1	1	10	84	16762	19.9548
coral1	GO:0004955	MF	prostaglandin receptor activity	0.0476121	1	1	10	84	16762	19.9548
coral1	GO:0017070	MF	U6 snRNA binding	0.0498524	1	1	10	84	16762	19.9548
coral1	GO:0048495	MF	Roundabout binding	0.0475461	1	1	10	84	16762	19.9548
coral1	GO:0008106	MF	alcohol dehydrogenase (NADP+) activity	0.00398058	1	2	20	84	16762	19.9548
coral1	GO:0043008	MF	ATP-dependent protein binding	0.0499316	1	1	11	84	16762	18.1407
coral1	GO:0004033	MF	aldo-keto reductase (NADP) activity	0.00477086	1	2	22	84	16762	18.1407
coral1	GO:0061631	MF	ubiquitin conjugating enzyme activity	0.0123851	1	2	35	84	16762	11.4027
coral1	GO:0061650	MF	ubiquitin-like protein conjugating enzyme activity	0.013786	1	2	37	84	16762	10.7864
coral1	GO:0004177	MF	aminopeptidase activity	0.0159189	1	2	40	84	16762	9.97738
coral1	GO:0003724	MF	RNA helicase activity	0.0366181	1	2	63	84	16762	6.33485
coral1	GO:0019843	MF	rRNA binding	0.0458966	1	2	70	84	16762	5.70136
coral1	GO:0019003	MF	GDP binding	0.0453666	1	2	71	84	16762	5.62106
coral1	GO:0005525	MF	GTP binding	0.00105282	1	7	333	84	16762	4.19469
coral1	GO:0043021	MF	ribonucleoprotein complex binding	0.032032	1	3	143	84	16762	4.18631
coral1	GO:0032550	MF	purine ribonucleoside binding	0.00118316	1	7	340	84	16762	4.10833
coral1	GO:0001883	MF	purine nucleoside binding	0.0012432	1	7	343	84	16762	4.0724
coral1	GO:0032549	MF	ribonucleoside binding	0.00124295	1	7	343	84	16762	4.0724
coral1	GO:0001882	MF	nucleoside binding	0.00142544	1	7	351	84	16762	3.97958
coral1	GO:0019001	MF	guanyl nucleotide binding	0.0014527	1	7	352	84	16762	3.96828
coral1	GO:0032561	MF	guanyl ribonucleotide binding	0.0014527	1	7	352	84	16762	3.96828
coral1	GO:0003924	MF	GTPase activity	0.0432676	1	4	275	84	16762	2.90251
coral1	GO:0008047	MF	enzyme activator activity	0.0162324	1	6	426	84	16762	2.81053
coral1	GO:0030234	MF	enzyme regulator activity	0.0494709	1	8	850	84	16762	1.8781
coral1	GO:0035639	MF	purine ribonucleoside triphosphate binding	0.00861057	1	15	1616	84	16762	1.85224
coral1	GO:0003723	MF	RNA binding	0.0496549	1	9	1002	84	16762	1.79234
coral1	GO:0032555	MF	purine ribonucleotide binding	0.0118368	1	15	1676	84	16762	1.78593
coral1	GO:0017076	MF	purine nucleotide binding	0.0125676	1	15	1687	84	16762	1.77428
coral1	GO:0032553	MF	ribonucleotide binding	0.0127187	1	15	1690	84	16762	1.77113
coral1	GO:0098772	MF	molecular function regulator	0.0432919	1	12	1460	84	16762	1.64012
coral1	GO:0097367	MF	carbohydrate derivative binding	0.0210053	1	16	1957	84	16762	1.63146
coral1	GO:0000166	MF	nucleotide binding	0.0330304	1	15	1899	84	16762	1.57621
coral1	GO:1901265	MF	nucleoside phosphate binding	0.0330304	1	15	1899	84	16762	1.57621
coral1	GO:0043168	MF	anion binding	0.0416894	1	18	2480	84	16762	1.44833
coral1	GO:1901363	MF	heterocyclic compound binding	0.0207481	1	30	4460	84	16762	1.34225
coral1	GO:0097159	MF	organic cyclic compound binding	0.0254033	1	30	4528	84	16762	1.32209
coral2	GO:0015616	MF	DNA translocase activity	0.0274609	1	1	6	78	16762	35.8162
coral2	GO:0008312	MF	7S RNA binding	0.0262398	1	1	6	78	16762	35.8162
coral2	GO:0089720	MF	caspase binding	0.0275058	1	1	6	78	16762	35.8162
coral2	GO:0008499	MF	UDP-galactose:beta-N-acetylglucosamine beta-1,3-galactosyltransferase activity	0.0317052	1	1	7	78	16762	30.6996
coral2	GO:0016861	MF	intramolecular oxidoreductase activity, interconverting aldoses and ketoses	0.0320028	1	1	7	78	16762	30.6996
coral2	GO:0030619	MF	U1 snRNA binding	0.0311372	1	1	7	78	16762	30.6996
coral2	GO:0031702	MF	type 1 angiotensin receptor binding	0.0318303	1	1	7	78	16762	30.6996
coral2	GO:0031730	MF	CCR5 chemokine receptor binding	0.0318067	1	1	7	78	16762	30.6996
coral2	GO:0035184	MF	histone threonine kinase activity	0.0318912	1	1	7	78	16762	30.6996
coral2	GO:0038036	MF	sphingosine-1-phosphate receptor activity	0.0317278	1	1	7	78	16762	30.6996
coral2	GO:0070006	MF	metalloaminopeptidase activity	0.00186511	1	2	14	78	16762	30.6996
coral2	GO:0008242	MF	omega peptidase activity	0.0409705	1	1	9	78	16762	23.8775
coral2	GO:0015651	MF	quaternary ammonium group transmembrane transporter activity	0.0394928	1	1	9	78	16762	23.8775
coral2	GO:0031701	MF	angiotensin receptor binding	0.0407848	1	1	9	78	16762	23.8775
coral2	GO:0047429	MF	nucleoside-triphosphate diphosphatase activity	0.0410076	1	1	9	78	16762	23.8775
coral2	GO:0048531	MF	beta-1,3-galactosyltransferase activity	0.0406762	1	1	9	78	16762	23.8775
coral2	GO:0086080	MF	protein binding involved in heterotypic cell-cell adhesion	0.0402376	1	1	9	78	16762	23.8775
coral2	GO:0004303	MF	estradiol 17-beta-dehydrogenase activity	0.0452201	1	1	10	78	16762	21.4897
coral2	GO:0008417	MF	fucosyltransferase activity	0.0453194	1	1	10	78	16762	21.4897
coral2	GO:0034452	MF	dynactin binding	0.0453329	1	1	10	78	16762	21.4897
coral2	GO:0050897	MF	cobalt ion binding	0.0454606	1	1	10	78	16762	21.4897
coral2	GO:0045125	MF	bioactive lipid receptor activity	0.0495725	1	1	11	78	16762	19.5361
coral2	GO:0030515	MF	snoRNA binding	0.00576695	1	2	25	78	16762	17.1918
coral2	GO:0017112	MF	Rab guanyl-nucleotide exchange factor activity	0.0118608	1	2	36	78	16762	11.9387
coral2	GO:0003899	MF	DNA-directed 5'-3' RNA polymerase activity	0.012573	1	2	37	78	16762	11.6161
coral2	GO:0097747	MF	RNA polymerase activity	0.0139151	1	2	39	78	16762	11.0204
coral2	GO:0034062	MF	5'-3' RNA polymerase activity	0.0139151	1	2	39	78	16762	11.0204
coral2	GO:0004177	MF	aminopeptidase activity	0.0146982	1	2	40	78	16762	10.7449
coral2	GO:0008235	MF	metalloexopeptidase activity	0.019239	1	2	46	78	16762	9.34337
coral2	GO:0043022	MF	ribosome binding	0.0331251	1	2	62	78	16762	6.93218
coral2	GO:0008238	MF	exopeptidase activity	0.00917496	1	3	93	78	16762	6.93218
coral2	GO:0005088	MF	Ras guanyl-nucleotide exchange factor activity	0.00253308	1	4	124	78	16762	6.93218
coral2	GO:0004722	MF	protein serine/threonine phosphatase activity	0.0361202	1	2	65	78	16762	6.61223
coral2	GO:0005089	MF	Rho guanyl-nucleotide exchange factor activity	0.0389592	1	2	68	78	16762	6.32051
coral2	GO:0005085	MF	guanyl-nucleotide exchange factor activity	0.0120014	1	4	193	78	16762	4.45383
coral2	GO:0017137	MF	Rab GTPase binding	0.0377098	1	3	160	78	16762	4.02933
coral2	GO:0051427	MF	hormone receptor binding	0.0386041	1	3	162	78	16762	3.97958
coral2	GO:0017048	MF	Rho GTPase binding	0.0392431	1	3	163	78	16762	3.95517
coral2	GO:0003729	MF	mRNA binding	0.0261245	1	4	244	78	16762	3.52291
coral2	GO:0017016	MF	Ras GTPase binding	0.0103262	1	6	401	78	16762	3.21542
coral2	GO:0031267	MF	small GTPase binding	0.0121519	1	6	416	78	16762	3.09948
coral2	GO:0004674	MF	protein serine/threonine kinase activity	0.0457117	1	5	424	78	16762	2.53417
coral2	GO:0051020	MF	GTPase binding	0.0295304	1	6	509	78	16762	2.53317
coral2	GO:0004672	MF	protein kinase activity	0.0462642	1	6	567	78	16762	2.27405
coral2	GO:0003723	MF	RNA binding	0.016089	1	10	1002	78	16762	2.14468
coral2	GO:0017111	MF	nucleoside-triphosphatase activity	0.0456881	1	7	716	78	16762	2.10095
coral2	GO:0140096	MF	catalytic activity, acting on a protein	0.00264659	1	18	1944	78	16762	1.98979
coral2	GO:0016772	MF	transferase activity, transferring phosphorus-containing groups	0.0463291	1	8	872	78	16762	1.97154
coral2	GO:0016740	MF	transferase activity	0.01229	1	17	2082	78	16762	1.75469
coral2	GO:0016787	MF	hydrolase activity	0.036734	1	16	2176	78	16762	1.58013
coral2	GO:0046872	MF	metal ion binding	0.0133546	1	23	3167	78	16762	1.56067
coral2	GO:0043169	MF	cation binding	0.0173884	1	23	3241	78	16762	1.52504
coral2	GO:0003824	MF	catalytic activity	0.00340569	1	35	5069	78	16762	1.48381
cyan	GO:0032795	MF	heterotrimeric G-protein binding	0.000279059	0.186191	3	7	390	16762	18.4198
cyan	GO:0015271	MF	outward rectifier potassium channel activity	0.000114226	0.114319	4	13	390	16762	13.2245
cyan	GO:0005113	MF	patched binding	0.0084647	1	2	7	390	16762	12.2799
cyan	GO:0051378	MF	serotonin binding	0.0100877	1	2	8	390	16762	10.7449
cyan	GO:0008503	MF	benzodiazepine receptor activity	0.011217	1	2	8	390	16762	10.7449
cyan	GO:0031402	MF	sodium ion binding	0.00159898	0.488978	3	12	390	16762	10.7449
cyan	GO:0004383	MF	guanylate cyclase activity	0.015122	1	2	9	390	16762	9.551
cyan	GO:0031432	MF	titin binding	0.0141882	1	2	9	390	16762	9.551
cyan	GO:0043176	MF	amine binding	0.0158952	1	2	10	390	16762	8.5959
cyan	GO:0022851	MF	GABA-gated chloride ion channel activity	0.0166038	1	2	10	390	16762	8.5959
cyan	GO:0004993	MF	G protein-coupled serotonin receptor activity	0.00403846	0.798378	3	16	390	16762	8.05865
cyan	GO:0099589	MF	serotonin receptor activity	0.00403846	0.798378	3	16	390	16762	8.05865
cyan	GO:0005237	MF	inhibitory extracellular ligand-gated ion channel activity	0.0202675	1	2	11	390	16762	7.81445
cyan	GO:0022841	MF	potassium ion leak channel activity	0.0220885	1	2	11	390	16762	7.81445
cyan	GO:0001162	MF	RNA polymerase II intronic transcription regulatory region sequence-specific DNA binding	0.0219793	1	2	12	390	16762	7.16325
cyan	GO:0099626	MF	voltage-gated calcium channel activity involved in regulation of presynaptic cytosolic calcium levels	0.0248772	1	2	12	390	16762	7.16325
cyan	GO:0031420	MF	alkali metal ion binding	0.00645033	1	3	19	390	16762	6.78623
cyan	GO:0004890	MF	GABA-A receptor activity	0.0276056	1	2	13	390	16762	6.61223
cyan	GO:0022840	MF	leak channel activity	0.0308473	1	2	13	390	16762	6.61223
cyan	GO:0022842	MF	narrow pore channel activity	0.0308473	1	2	13	390	16762	6.61223
cyan	GO:0099511	MF	voltage-gated calcium channel activity involved in regulation of cytosolic calcium levels	0.0293464	1	2	13	390	16762	6.61223
cyan	GO:0008227	MF	G protein-coupled amine receptor activity	0.00193923	0.554518	4	26	390	16762	6.61223
cyan	GO:0016500	MF	protein-hormone receptor activity	0.0331885	1	2	14	390	16762	6.13993
cyan	GO:0001161	MF	intronic transcription regulatory region sequence-specific DNA binding	0.029966	1	2	14	390	16762	6.13993
cyan	GO:0004806	MF	triglyceride lipase activity	0.0363876	1	2	14	390	16762	6.13993
cyan	GO:0005003	MF	ephrin receptor activity	0.033153	1	2	14	390	16762	6.13993
cyan	GO:0008191	MF	metalloendopeptidase inhibitor activity	0.0331898	1	2	14	390	16762	6.13993
cyan	GO:0099528	MF	G protein-coupled neurotransmitter receptor activity	0.00891107	1	3	21	390	16762	6.13993
cyan	GO:0099095	MF	ligand-gated anion channel activity	0.0359963	1	2	15	390	16762	5.7306
cyan	GO:0008307	MF	structural constituent of muscle	0.011874	1	3	23	390	16762	5.60602
cyan	GO:0016917	MF	GABA receptor activity	0.040565	1	2	16	390	16762	5.37244
cyan	GO:0005249	MF	voltage-gated potassium channel activity	0.000381155	0.233119	7	65	390	16762	4.62856
cyan	GO:0015459	MF	potassium channel regulator activity	0.00954125	1	4	40	390	16762	4.29795
cyan	GO:0022843	MF	voltage-gated cation channel activity	2.36715e-05	0.057911	11	114	390	16762	4.14714
cyan	GO:0005267	MF	potassium channel activity	0.000203593	0.144604	9	98	390	16762	3.9471
cyan	GO:0042165	MF	neurotransmitter binding	0.012819	1	4	45	390	16762	3.8204
cyan	GO:0005244	MF	voltage-gated ion channel activity	6.01651e-06	0.0441572	14	160	390	16762	3.76071
cyan	GO:0022832	MF	voltage-gated channel activity	6.01651e-06	0.0441572	14	160	390	16762	3.76071
cyan	GO:0030594	MF	neurotransmitter receptor activity	0.00359573	0.78387	6	72	390	16762	3.58162
cyan	GO:0008146	MF	sulfotransferase activity	0.0411091	1	3	38	390	16762	3.39312
cyan	GO:0019212	MF	phosphatase inhibitor activity	0.0451143	1	3	38	390	16762	3.39312
cyan	GO:0015079	MF	potassium ion transmembrane transporter activity	0.000350823	0.220697	10	129	390	16762	3.33174
cyan	GO:1904315	MF	transmitter-gated ion channel activity involved in regulation of postsynaptic membrane potential	0.0467176	1	3	40	390	16762	3.22346
cyan	GO:0004714	MF	transmembrane receptor protein tyrosine kinase activity	0.0281908	1	4	55	390	16762	3.12578
cyan	GO:0098960	MF	postsynaptic neurotransmitter receptor activity	0.0260984	1	4	55	390	16762	3.12578
cyan	GO:0022836	MF	gated channel activity	1.1513e-05	0.0490038	18	267	390	16762	2.89749
cyan	GO:0005261	MF	cation channel activity	0.000145589	0.127563	16	268	390	16762	2.56594
cyan	GO:0005216	MF	ion channel activity	8.06945e-05	0.0987073	19	338	390	16762	2.41601
cyan	GO:0022803	MF	passive transmembrane transporter activity	7.52255e-05	0.0987073	20	365	390	16762	2.35504
cyan	GO:0015267	MF	channel activity	7.52255e-05	0.0987073	20	365	390	16762	2.35504
cyan	GO:0046873	MF	metal ion transmembrane transporter activity	0.000422758	0.244955	18	355	390	16762	2.17924
cyan	GO:0015077	MF	monovalent inorganic cation transmembrane transporter activity	0.00138116	0.453887	15	297	390	16762	2.17068
cyan	GO:0004713	MF	protein tyrosine kinase activity	0.0422098	1	6	122	390	16762	2.11375
cyan	GO:0005509	MF	calcium ion binding	0.000133362	0.122349	25	532	390	16762	2.01971
cyan	GO:0008237	MF	metallopeptidase activity	0.0428203	1	7	152	390	16762	1.97932
cyan	GO:0004930	MF	G protein-coupled receptor activity	0.0063025	0.992235	14	314	390	16762	1.91628
cyan	GO:0022890	MF	inorganic cation transmembrane transporter activity	0.00216861	0.596855	20	476	390	16762	1.80586
cyan	GO:0008324	MF	cation transmembrane transporter activity	0.0024843	0.645145	21	516	390	16762	1.74917
cyan	GO:0015318	MF	inorganic molecular entity transmembrane transporter activity	0.00107498	0.422661	26	651	390	16762	1.71654
cyan	GO:0060089	MF	molecular transducer activity	0.000481216	0.258425	32	823	390	16762	1.67113
cyan	GO:0038023	MF	signaling receptor activity	0.000481216	0.258425	32	823	390	16762	1.67113
cyan	GO:0015075	MF	ion transmembrane transporter activity	0.00126368	0.445312	27	695	390	16762	1.66971
cyan	GO:0004888	MF	transmembrane signaling receptor activity	0.00387868	0.798378	25	677	390	16762	1.58713
cyan	GO:0022857	MF	transmembrane transporter activity	0.00477188	0.840538	29	839	390	16762	1.48558
cyan	GO:0005215	MF	transporter activity	0.0137595	1	30	949	390	16762	1.35868
darkgreen	GO:0005229	MF	intracellular calcium activated chloride channel activity	0.00704976	1	2	8	313	16762	13.3882
darkgreen	GO:0061778	MF	intracellular chloride channel activity	0.00704976	1	2	8	313	16762	13.3882
darkgreen	GO:0019841	MF	retinol binding	0.000872683	1	3	12	313	16762	13.3882
darkgreen	GO:0004181	MF	metallocarboxypeptidase activity	0.000347215	0.849443	4	21	313	16762	10.2005
darkgreen	GO:0023023	MF	MHC protein complex binding	0.0134279	1	2	11	313	16762	9.73686
darkgreen	GO:0032036	MF	myosin heavy chain binding	0.0158884	1	2	12	313	16762	8.92545
darkgreen	GO:0070700	MF	BMP receptor binding	0.0159694	1	2	12	313	16762	8.92545
darkgreen	GO:0016918	MF	retinal binding	0.0186573	1	2	13	313	16762	8.23888
darkgreen	GO:0042043	MF	neurexin family protein binding	0.0186771	1	2	13	313	16762	8.23888
darkgreen	GO:0005243	MF	gap junction channel activity	0.0215602	1	2	14	313	16762	7.65039
darkgreen	GO:0005184	MF	neuropeptide hormone activity	0.0313188	1	2	17	313	16762	6.30032
darkgreen	GO:0004970	MF	ionotropic glutamate receptor activity	0.0346299	1	2	18	313	16762	5.9503
darkgreen	GO:0008569	MF	ATP-dependent microtubule motor activity, minus-end-directed	0.0347292	1	2	18	313	16762	5.9503
darkgreen	GO:0070696	MF	transmembrane receptor protein serine/threonine kinase binding	0.0347444	1	2	18	313	16762	5.9503
darkgreen	GO:0005501	MF	retinoid binding	0.00960873	1	3	27	313	16762	5.9503
darkgreen	GO:0004180	MF	carboxypeptidase activity	0.00342903	1	4	38	313	16762	5.63713
darkgreen	GO:0005104	MF	fibroblast growth factor receptor binding	0.0422033	1	2	20	313	16762	5.35527
darkgreen	GO:0008373	MF	sialyltransferase activity	0.0421937	1	2	20	313	16762	5.35527
darkgreen	GO:0019840	MF	isoprenoid binding	0.0153176	1	3	32	313	16762	5.02057
darkgreen	GO:0008235	MF	metalloexopeptidase activity	0.00685934	1	4	46	313	16762	4.65676
darkgreen	GO:0003707	MF	steroid hormone receptor activity	0.0356095	1	3	44	313	16762	3.65132
darkgreen	GO:0022824	MF	transmitter-gated ion channel activity	0.0354923	1	3	44	313	16762	3.65132
darkgreen	GO:0022835	MF	transmitter-gated channel activity	0.0354923	1	3	44	313	16762	3.65132
darkgreen	GO:0042165	MF	neurotransmitter binding	0.037555	1	3	45	313	16762	3.57018
darkgreen	GO:0004984	MF	olfactory receptor activity	0.00788088	1	5	75	313	16762	3.57018
darkgreen	GO:0005254	MF	chloride channel activity	0.0490743	1	3	50	313	16762	3.21316
darkgreen	GO:0015108	MF	chloride transmembrane transporter activity	0.0269819	1	4	69	313	16762	3.10451
darkgreen	GO:0008528	MF	G protein-coupled peptide receptor activity	0.0203252	1	5	95	313	16762	2.81856
darkgreen	GO:0001653	MF	peptide receptor activity	0.0257043	1	5	101	313	16762	2.65112
darkgreen	GO:0008237	MF	metallopeptidase activity	0.013108	1	7	152	313	16762	2.46624
darkgreen	GO:0004930	MF	G protein-coupled receptor activity	0.00073902	1	14	314	313	16762	2.3877
darkgreen	GO:0004252	MF	serine-type endopeptidase activity	0.0415155	1	5	115	313	16762	2.32838
darkgreen	GO:0004888	MF	transmembrane signaling receptor activity	5.62146e-05	0.309433	26	677	313	16762	2.05668
darkgreen	GO:0060089	MF	molecular transducer activity	3.91191e-05	0.287108	30	823	313	16762	1.9521
darkgreen	GO:0038023	MF	signaling receptor activity	3.91191e-05	0.287108	30	823	313	16762	1.9521
darkgreen	GO:0030545	MF	receptor regulator activity	0.0235502	1	12	379	313	16762	1.6956
darkgreen	GO:0048018	MF	receptor ligand activity	0.0302622	1	11	349	313	16762	1.68791
darkgreen	GO:0030546	MF	signaling receptor activator activity	0.0336346	1	11	355	313	16762	1.65938
darkgreen	GO:0005509	MF	calcium ion binding	0.0307063	1	15	532	313	16762	1.50994
darkgreen	GO:0005102	MF	signaling receptor binding	0.00598265	1	35	1367	313	16762	1.37114
darkgrey	GO:0008401	MF	retinoic acid 4-hydroxylase activity	0.00011764	0.25902	3	7	294	16762	24.4344
darkgrey	GO:0101020	MF	estrogen 16-alpha-hydroxylase activity	0.00337971	1	2	6	294	16762	19.0045
darkgrey	GO:0042289	MF	MHC class II protein binding	0.00435485	1	2	7	294	16762	16.2896
darkgrey	GO:0015250	MF	water channel activity	0.00756474	1	2	9	294	16762	12.6697
darkgrey	GO:0005372	MF	water transmembrane transporter activity	0.00934883	1	2	10	294	16762	11.4027
darkgrey	GO:0035197	MF	siRNA binding	0.00879538	1	2	10	294	16762	11.4027
darkgrey	GO:0005237	MF	inhibitory extracellular ligand-gated ion channel activity	0.0106951	1	2	11	294	16762	10.3661
darkgrey	GO:0004016	MF	adenylate cyclase activity	0.0138243	1	2	12	294	16762	9.50227
darkgrey	GO:0019841	MF	retinol binding	0.0134309	1	2	12	294	16762	9.50227
darkgrey	GO:0070330	MF	aromatase activity	0.0137505	1	2	12	294	16762	9.50227
darkgrey	GO:0008188	MF	neuropeptide receptor activity	0.000393301	0.481094	4	24	294	16762	9.50227
darkgrey	GO:0015269	MF	calcium-activated potassium channel activity	0.0154037	1	2	13	294	16762	8.77132
darkgrey	GO:0016918	MF	retinal binding	0.0149442	1	2	13	294	16762	8.77132
darkgrey	GO:0016881	MF	acid-amino acid ligase activity	0.0183756	1	2	14	294	16762	8.1448
darkgrey	GO:0099095	MF	ligand-gated anion channel activity	0.0195214	1	2	15	294	16762	7.60181
darkgrey	GO:0005212	MF	structural constituent of eye lens	0.0230184	1	2	16	294	16762	7.1267
darkgrey	GO:0005402	MF	carbohydrate:cation symporter activity	0.0235738	1	2	16	294	16762	7.1267
darkgrey	GO:0008179	MF	adenylate cyclase binding	0.021628	1	2	16	294	16762	7.1267
darkgrey	GO:0005501	MF	retinoid binding	0.00690618	1	3	27	294	16762	6.33485
darkgrey	GO:0042287	MF	MHC protein binding	0.00791321	1	3	28	294	16762	6.1086
darkgrey	GO:0008395	MF	steroid hydroxylase activity	0.00928984	1	3	29	294	16762	5.89796
darkgrey	GO:0005355	MF	glucose transmembrane transporter activity	0.0354687	1	2	20	294	16762	5.70136
darkgrey	GO:0015149	MF	hexose transmembrane transporter activity	0.0354687	1	2	20	294	16762	5.70136
darkgrey	GO:0019840	MF	isoprenoid binding	0.0108517	1	3	32	294	16762	5.34503
darkgrey	GO:0015145	MF	monosaccharide transmembrane transporter activity	0.04263	1	2	22	294	16762	5.18306
darkgrey	GO:0009975	MF	cyclase activity	0.0464744	1	2	23	294	16762	4.9577
darkgrey	GO:0016849	MF	phosphorus-oxygen lyase activity	0.0471992	1	2	23	294	16762	4.9577
darkgrey	GO:0016712	MF	oxidoreductase activity, acting on paired donors, with incorporation or reduction of molecular oxygen, reduced flavin or flavoprotein as one donor, and incorporation of one atom of oxygen	0.0463994	1	2	23	294	16762	4.9577
darkgrey	GO:0051119	MF	sugar transmembrane transporter activity	0.0462131	1	2	23	294	16762	4.9577
darkgrey	GO:0005227	MF	calcium activated cation channel activity	0.0491041	1	2	24	294	16762	4.75113
darkgrey	GO:0032451	MF	demethylase activity	0.0176871	1	3	37	294	16762	4.62272
darkgrey	GO:0061980	MF	regulatory RNA binding	0.0167846	1	3	37	294	16762	4.62272
darkgrey	GO:1904315	MF	transmitter-gated ion channel activity involved in regulation of postsynaptic membrane potential	0.0201111	1	3	40	294	16762	4.27602
darkgrey	GO:0098960	MF	postsynaptic neurotransmitter receptor activity	0.00863609	1	4	55	294	16762	4.14644
darkgrey	GO:0099529	MF	neurotransmitter receptor activity involved in regulation of postsynaptic membrane potential	0.024654	1	3	43	294	16762	3.97769
darkgrey	GO:0005179	MF	hormone activity	0.0048371	1	5	73	294	16762	3.90504
darkgrey	GO:0022824	MF	transmitter-gated ion channel activity	0.0260641	1	3	44	294	16762	3.88729
darkgrey	GO:0022835	MF	transmitter-gated channel activity	0.0260641	1	3	44	294	16762	3.88729
darkgrey	GO:0004497	MF	monooxygenase activity	0.00485217	1	5	74	294	16762	3.85227
darkgrey	GO:0016763	MF	transferase activity, transferring pentosyl groups	0.0345256	1	3	48	294	16762	3.56335
darkgrey	GO:0020037	MF	heme binding	0.00310999	1	6	96	294	16762	3.56335
darkgrey	GO:0005544	MF	calcium-dependent phospholipid binding	0.0334962	1	3	49	294	16762	3.49063
darkgrey	GO:0005506	MF	iron ion binding	0.00215864	1	7	120	294	16762	3.32579
darkgrey	GO:0046906	MF	tetrapyrrole binding	0.00485745	1	6	105	294	16762	3.25792
darkgrey	GO:0005230	MF	extracellular ligand-gated ion channel activity	0.0448022	1	3	54	294	16762	3.16742
darkgrey	GO:0030594	MF	neurotransmitter receptor activity	0.0216468	1	4	72	294	16762	3.16742
darkgrey	GO:0004984	MF	olfactory receptor activity	0.0251688	1	4	75	294	16762	3.04073
darkgrey	GO:0008528	MF	G protein-coupled peptide receptor activity	0.0138084	1	5	95	294	16762	3.00072
darkgrey	GO:0016705	MF	oxidoreductase activity, acting on paired donors, with incorporation or reduction of molecular oxygen	0.00408643	1	7	135	294	16762	2.95626
darkgrey	GO:0005267	MF	potassium channel activity	0.0157903	1	5	98	294	16762	2.90886
darkgrey	GO:0001653	MF	peptide receptor activity	0.0176605	1	5	101	294	16762	2.82246
darkgrey	GO:0051117	MF	ATPase binding	0.0387521	1	4	85	294	16762	2.68299
darkgrey	GO:0015079	MF	potassium ion transmembrane transporter activity	0.0127181	1	6	129	294	16762	2.6518
darkgrey	GO:0004930	MF	G protein-coupled receptor activity	0.000270319	0.371993	14	314	294	16762	2.54201
darkgrey	GO:0004888	MF	transmembrane signaling receptor activity	0.000194121	0.356181	23	677	294	16762	1.93695
darkgrey	GO:0022803	MF	passive transmembrane transporter activity	0.0203857	1	11	365	294	16762	1.71822
darkgrey	GO:0015267	MF	channel activity	0.0203857	1	11	365	294	16762	1.71822
darkgrey	GO:0022836	MF	gated channel activity	0.0455341	1	8	267	294	16762	1.70827
darkgrey	GO:0060089	MF	molecular transducer activity	0.00270983	1	23	823	294	16762	1.59333
darkgrey	GO:0038023	MF	signaling receptor activity	0.00270983	1	23	823	294	16762	1.59333
darkgrey	GO:0015318	MF	inorganic molecular entity transmembrane transporter activity	0.0333322	1	16	651	294	16762	1.40126
darkmagenta	GO:0046975	MF	histone methyltransferase activity (H3-K36 specific)	0.00269997	1	2	7	205	16762	23.3617
darkmagenta	GO:1990763	MF	arrestin family protein binding	0.00467757	1	2	9	205	16762	18.1702
darkmagenta	GO:0004706	MF	JUN kinase kinase kinase activity	0.00547816	1	2	10	205	16762	16.3532
darkmagenta	GO:0035251	MF	UDP-glucosyltransferase activity	0.00574541	1	2	10	205	16762	16.3532
darkmagenta	GO:0046974	MF	histone methyltransferase activity (H3-K9 specific)	0.0067907	1	2	11	205	16762	14.8665
darkmagenta	GO:0032454	MF	histone demethylase activity (H3-K9 specific)	0.00822752	1	2	12	205	16762	13.6276
darkmagenta	GO:0042800	MF	histone methyltransferase activity (H3-K4 specific)	0.0111745	1	2	14	205	16762	11.6808
darkmagenta	GO:0046527	MF	glucosyltransferase activity	0.0149379	1	2	16	205	16762	10.2207
darkmagenta	GO:0030506	MF	ankyrin binding	0.016205	1	2	17	205	16762	9.61951
darkmagenta	GO:0070577	MF	lysine-acetylated histone binding	0.0158748	1	2	17	205	16762	9.61951
darkmagenta	GO:0140033	MF	acetylation-dependent protein binding	0.0158748	1	2	17	205	16762	9.61951
darkmagenta	GO:0018024	MF	histone-lysine N-methyltransferase activity	0.00158028	1	4	43	205	16762	7.60613
darkmagenta	GO:0070530	MF	K63-linked polyubiquitin modification-dependent protein binding	0.0272268	1	2	22	205	16762	7.43326
darkmagenta	GO:0140457	MF	protein demethylase activity	0.0373019	1	2	26	205	16762	6.28968
darkmagenta	GO:0004709	MF	MAP kinase kinase kinase activity	0.0363574	1	2	26	205	16762	6.28968
darkmagenta	GO:0032452	MF	histone demethylase activity	0.0373019	1	2	26	205	16762	6.28968
darkmagenta	GO:0042054	MF	histone methyltransferase activity	0.00316899	1	4	52	205	16762	6.28968
darkmagenta	GO:0016278	MF	lysine N-methyltransferase activity	0.00395883	1	4	55	205	16762	5.94661
darkmagenta	GO:0016279	MF	protein-lysine N-methyltransferase activity	0.00395883	1	4	55	205	16762	5.94661
darkmagenta	GO:0008276	MF	protein methyltransferase activity	0.0140658	1	4	79	205	16762	4.14004
darkmagenta	GO:0008170	MF	N-methyltransferase activity	0.0165936	1	4	83	205	16762	3.94052
darkmagenta	GO:0001085	MF	RNA polymerase II transcription factor binding	0.0423088	1	3	67	205	16762	3.66116
darkmagenta	GO:0070491	MF	repressing transcription factor binding	0.0447766	1	3	68	205	16762	3.60732
darkmagenta	GO:0140030	MF	modification-dependent protein binding	0.00540633	1	6	137	205	16762	3.58099
darkmagenta	GO:0042393	MF	histone binding	0.00145301	1	8	184	205	16762	3.55504
darkmagenta	GO:0003682	MF	chromatin binding	0.00058272	0.933492	16	536	205	16762	2.44077
darkmagenta	GO:0008270	MF	zinc ion binding	0.0146591	1	14	621	205	16762	1.84335
darkmagenta	GO:0008134	MF	transcription factor binding	0.0114286	1	15	666	205	16762	1.84157
darkmagenta	GO:0016740	MF	transferase activity	0.0270668	1	34	2082	205	16762	1.33527
darkmagenta	GO:0005515	MF	protein binding	0.0227713	1	107	7916	205	16762	1.10522
darkolivegreen	GO:0003988	MF	acetyl-CoA C-acyltransferase activity	2.46401e-06	0.00452104	4	9	206	16762	36.164
darkolivegreen	GO:0016406	MF	carnitine O-acyltransferase activity	0.00215103	0.974165	2	6	206	16762	27.123
darkolivegreen	GO:0003857	MF	3-hydroxyacyl-CoA dehydrogenase activity	0.00390398	1	2	8	206	16762	20.3422
darkolivegreen	GO:0004300	MF	enoyl-CoA hydratase activity	0.00392567	1	2	8	206	16762	20.3422
darkolivegreen	GO:0016408	MF	C-acyltransferase activity	3.44776e-05	0.0420793	4	16	206	16762	20.3422
darkolivegreen	GO:0035612	MF	AP-2 adaptor complex binding	0.00608452	1	2	10	206	16762	16.2738
darkolivegreen	GO:0003995	MF	acyl-CoA dehydrogenase activity	0.00631077	1	2	10	206	16762	16.2738
darkolivegreen	GO:0098505	MF	G-rich strand telomeric DNA binding	0.00623182	1	2	10	206	16762	16.2738
darkolivegreen	GO:0000062	MF	fatty-acyl-CoA binding	1.08385e-05	0.0149151	5	25	206	16762	16.2738
darkolivegreen	GO:0043047	MF	single-stranded telomeric DNA binding	0.00900253	1	2	12	206	16762	13.5615
darkolivegreen	GO:0016289	MF	CoA hydrolase activity	0.00149595	0.803361	3	19	206	16762	12.8477
darkolivegreen	GO:1901567	MF	fatty acid derivative binding	3.82226e-05	0.0420793	5	32	206	16762	12.7139
darkolivegreen	GO:0098847	MF	sequence-specific single stranded DNA binding	0.0121997	1	2	14	206	16762	11.6241
darkolivegreen	GO:0015095	MF	magnesium ion transmembrane transporter activity	0.0151597	1	2	16	206	16762	10.1711
darkolivegreen	GO:0047617	MF	acyl-CoA hydrolase activity	0.0177982	1	2	17	206	16762	9.57282
darkolivegreen	GO:0031418	MF	L-ascorbic acid binding	0.0194477	1	2	18	206	16762	9.04099
darkolivegreen	GO:0008198	MF	ferrous iron binding	0.0287287	1	2	22	206	16762	7.39718
darkolivegreen	GO:0051287	MF	NAD binding	0.0007945	0.546666	5	60	206	16762	6.78074
darkolivegreen	GO:0016790	MF	thiolester hydrolase activity	0.0101804	1	3	37	206	16762	6.59748
darkolivegreen	GO:0004683	MF	calmodulin-dependent protein kinase activity	0.0393377	1	2	26	206	16762	6.25915
darkolivegreen	GO:0043236	MF	laminin binding	0.0428445	1	2	27	206	16762	6.02733
darkolivegreen	GO:0004407	MF	histone deacetylase activity	0.0445145	1	2	28	206	16762	5.81207
darkolivegreen	GO:0030551	MF	cyclic nucleotide binding	0.0451046	1	2	28	206	16762	5.81207
darkolivegreen	GO:0043325	MF	phosphatidylinositol-3,4-bisphosphate binding	0.0451706	1	2	28	206	16762	5.81207
darkolivegreen	GO:0033558	MF	protein deacetylase activity	0.047504	1	2	29	206	16762	5.61165
darkolivegreen	GO:0016706	MF	2-oxoglutarate-dependent dioxygenase activity	0.0161563	1	3	44	206	16762	5.54788
darkolivegreen	GO:0016705	MF	oxidoreductase activity, acting on paired donors, with incorporation or reduction of molecular oxygen	0.00129002	0.788991	7	135	206	16762	4.21913
darkolivegreen	GO:0008081	MF	phosphoric diester hydrolase activity	0.0189764	1	4	84	206	16762	3.87471
darkolivegreen	GO:0051213	MF	dioxygenase activity	0.0220635	1	4	88	206	16762	3.69859
darkolivegreen	GO:0042626	MF	ATPase-coupled transmembrane transporter activity	0.0246157	1	4	91	206	16762	3.57666
darkolivegreen	GO:0015399	MF	primary active transmembrane transporter activity	0.0302087	1	4	97	206	16762	3.35542
darkolivegreen	GO:0050662	MF	coenzyme binding	0.000440944	0.326058	11	268	206	16762	3.33977
darkolivegreen	GO:0003697	MF	single-stranded DNA binding	0.0438424	1	4	109	206	16762	2.98602
darkolivegreen	GO:1901681	MF	sulfur compound binding	0.017067	1	7	218	206	16762	2.61276
darkolivegreen	GO:0017137	MF	Rab GTPase binding	0.0455763	1	5	160	206	16762	2.54278
darkolivegreen	GO:0048037	MF	cofactor binding	0.0012662	0.788991	14	452	206	16762	2.52028
darkolivegreen	GO:0016747	MF	transferase activity, transferring acyl groups other than amino-acyl groups	0.0437189	1	6	211	206	16762	2.31381
darkolivegreen	GO:0003779	MF	actin binding	0.00892023	1	11	395	206	16762	2.26597
darkolivegreen	GO:0016491	MF	oxidoreductase activity	0.00589256	1	16	651	206	16762	1.99985
darkolivegreen	GO:0016788	MF	hydrolase activity, acting on ester bonds	0.00588623	1	16	652	206	16762	1.99678
darkolivegreen	GO:0042578	MF	phosphoric ester hydrolase activity	0.0485019	1	8	331	206	16762	1.96662
darkolivegreen	GO:0042803	MF	protein homodimerization activity	0.03093	1	17	856	206	16762	1.61597
darkolivegreen	GO:0032559	MF	adenyl ribonucleotide binding	0.00772974	1	27	1366	206	16762	1.60832
darkolivegreen	GO:0030554	MF	adenyl nucleotide binding	0.00849302	1	27	1376	206	16762	1.59663
darkolivegreen	GO:0008092	MF	cytoskeletal protein binding	0.0476276	1	17	903	206	16762	1.53186
darkolivegreen	GO:0000166	MF	nucleotide binding	0.0124763	1	34	1899	206	16762	1.45684
darkolivegreen	GO:1901265	MF	nucleoside phosphate binding	0.0124763	1	34	1899	206	16762	1.45684
darkolivegreen	GO:0140096	MF	catalytic activity, acting on a protein	0.0175967	1	34	1944	206	16762	1.42312
darkolivegreen	GO:0032555	MF	purine ribonucleotide binding	0.0308971	1	29	1676	206	16762	1.40793
darkolivegreen	GO:0017076	MF	purine nucleotide binding	0.0333145	1	29	1687	206	16762	1.39875
darkolivegreen	GO:0032553	MF	ribonucleotide binding	0.0339669	1	29	1690	206	16762	1.39627
darkolivegreen	GO:0036094	MF	small molecule binding	0.0227164	1	37	2199	206	16762	1.3691
darkolivegreen	GO:0003824	MF	catalytic activity	0.000767922	0.545423	83	5069	206	16762	1.33234
darkolivegreen	GO:0097367	MF	carbohydrate derivative binding	0.0469954	1	32	1957	206	16762	1.33051
darkolivegreen	GO:0016787	MF	hydrolase activity	0.0474738	1	35	2176	206	16762	1.30878
darkolivegreen	GO:0043168	MF	anion binding	0.0491116	1	39	2480	206	16762	1.27959
darkolivegreen	GO:0043167	MF	ion binding	0.0298248	1	73	4969	206	16762	1.1954
darkolivegreen	GO:0005488	MF	binding	0.0133505	1	150	11141	206	16762	1.09553
darkorange	GO:1990948	MF	ubiquitin ligase inhibitor activity	4.72036e-05	0.0288702	3	6	239	16762	35.0669
darkorange	GO:0055105	MF	ubiquitin-protein transferase inhibitor activity	8.21921e-05	0.0411297	3	7	239	16762	30.0574
darkorange	GO:0004576	MF	oligosaccharyl transferase activity	0.000169958	0.0701725	3	9	239	16762	23.378
darkorange	GO:0004579	MF	dolichyl-diphosphooligosaccharide-protein glycotransferase activity	0.000169958	0.0701725	3	9	239	16762	23.378
darkorange	GO:0008097	MF	5S rRNA binding	0.000652251	0.168956	3	13	239	16762	16.1847
darkorange	GO:0070180	MF	large ribosomal subunit rRNA binding	0.00558592	0.675774	2	9	239	16762	15.5853
darkorange	GO:0003735	MF	structural constituent of ribosome	5.75556e-26	3.16815e-22	29	146	239	16762	13.9307
darkorange	GO:0016505	MF	peptidase activator activity involved in apoptotic process	0.00914052	0.827595	2	11	239	16762	12.7516
darkorange	GO:0070181	MF	small ribosomal subunit rRNA binding	0.0090366	0.822181	2	11	239	16762	12.7516
darkorange	GO:0043422	MF	protein kinase B binding	0.00143998	0.323524	3	17	239	16762	12.3766
darkorange	GO:0019843	MF	rRNA binding	1.08763e-10	1.2604e-07	12	70	239	16762	12.023
darkorange	GO:0055106	MF	ubiquitin-protein transferase regulator activity	0.00175203	0.358893	3	18	239	16762	11.689
darkorange	GO:0003756	MF	protein disulfide isomerase activity	0.014052	0.861645	2	14	239	16762	10.0191
darkorange	GO:0015037	MF	peptide disulfide oxidoreductase activity	0.0147398	0.891594	2	14	239	16762	10.0191
darkorange	GO:0016864	MF	intramolecular oxidoreductase activity, transposing S-S bonds	0.014052	0.861645	2	14	239	16762	10.0191
darkorange	GO:0004697	MF	protein kinase C activity	0.0173277	0.978259	2	15	239	16762	9.35119
darkorange	GO:0043024	MF	ribosomal small subunit binding	0.016554	0.949183	2	15	239	16762	9.35119
darkorange	GO:0042288	MF	MHC class I protein binding	0.0237234	1	2	18	239	16762	7.79265
darkorange	GO:0017056	MF	structural constituent of nuclear pore	0.0267882	1	2	19	239	16762	7.38251
darkorange	GO:0031434	MF	mitogen-activated protein kinase kinase binding	0.0268636	1	2	19	239	16762	7.38251
darkorange	GO:0004860	MF	protein kinase inhibitor activity	0.000606292	0.163911	5	51	239	16762	6.87587
darkorange	GO:0016831	MF	carboxy-lyase activity	0.00795967	0.756358	3	31	239	16762	6.78715
darkorange	GO:0004033	MF	aldo-keto reductase (NADP) activity	0.034737	1	2	22	239	16762	6.37581
darkorange	GO:0019210	MF	kinase inhibitor activity	0.000925285	0.228909	5	56	239	16762	6.26195
darkorange	GO:0003755	MF	peptidyl-prolyl cis-trans isomerase activity	0.0104047	0.856053	3	34	239	16762	6.18828
darkorange	GO:0003743	MF	translation initiation factor activity	0.00325557	0.515086	4	46	239	16762	6.0986
darkorange	GO:0048027	MF	mRNA 5'-UTR binding	0.0409622	1	2	24	239	16762	5.84449
darkorange	GO:0016859	MF	cis-trans isomerase activity	0.0131985	0.856053	3	37	239	16762	5.68653
darkorange	GO:0030742	MF	GTP-dependent protein binding	0.0483131	1	2	26	239	16762	5.39491
darkorange	GO:0043236	MF	laminin binding	0.0483058	1	2	27	239	16762	5.1951
darkorange	GO:0048487	MF	beta-tubulin binding	0.0174325	0.979154	3	41	239	16762	5.13175
darkorange	GO:0005198	MF	structural molecule activity	6.54014e-17	1.80001e-13	36	495	239	16762	5.10065
darkorange	GO:0030544	MF	Hsp70 protein binding	0.0230585	1	3	46	239	16762	4.57395
darkorange	GO:0051082	MF	unfolded protein binding	0.00143886	0.323524	6	92	239	16762	4.57395
darkorange	GO:0016830	MF	carbon-carbon lyase activity	0.0255168	1	3	48	239	16762	4.38337
darkorange	GO:0003729	MF	mRNA binding	5.23053e-06	0.00411306	14	244	239	16762	4.02408
darkorange	GO:0048029	MF	monosaccharide binding	0.0143649	0.87131	4	71	239	16762	3.95121
darkorange	GO:0050840	MF	extracellular matrix binding	0.0353771	1	3	54	239	16762	3.89633
darkorange	GO:0004521	MF	endoribonuclease activity	0.0380753	1	3	55	239	16762	3.82548
darkorange	GO:0008135	MF	translation factor activity, RNA binding	0.0185872	1	4	76	239	16762	3.69126
darkorange	GO:0016765	MF	transferase activity, transferring alkyl or aryl (other than methyl) groups	0.0417508	1	3	58	239	16762	3.62762
darkorange	GO:0003678	MF	DNA helicase activity	0.0496968	1	3	61	239	16762	3.44921
darkorange	GO:0044325	MF	ion channel binding	0.00650254	0.694277	6	123	239	16762	3.42117
darkorange	GO:0004519	MF	endonuclease activity	0.01729	0.978259	5	112	239	16762	3.13098
darkorange	GO:0003723	MF	RNA binding	1.36556e-12	2.14764e-09	44	1002	239	16762	3.07973
darkorange	GO:0016810	MF	hydrolase activity, acting on carbon-nitrogen (but not peptide) bonds	0.0201256	1	5	117	239	16762	2.99717
darkorange	GO:0090079	MF	translation regulator activity, nucleic acid binding	0.0368407	1	4	94	239	16762	2.98442
darkorange	GO:0004540	MF	ribonuclease activity	0.0431108	1	4	98	239	16762	2.86261
darkorange	GO:0008094	MF	DNA-dependent ATPase activity	0.0465455	1	4	100	239	16762	2.80536
darkorange	GO:0031072	MF	heat shock protein binding	0.0322618	1	5	132	239	16762	2.65659
darkorange	GO:0008201	MF	heparin binding	0.0355156	1	5	136	239	16762	2.57845
darkorange	GO:0016853	MF	isomerase activity	0.0436639	1	5	143	239	16762	2.45223
darkorange	GO:0043021	MF	ribonucleoprotein complex binding	0.0415679	1	5	143	239	16762	2.45223
darkorange	GO:0004857	MF	enzyme inhibitor activity	0.00704965	0.708764	10	297	239	16762	2.36141
darkorange	GO:1901681	MF	sulfur compound binding	0.0268711	1	7	218	239	16762	2.25201
darkorange	GO:0031625	MF	ubiquitin protein ligase binding	0.0155493	0.92531	9	286	239	16762	2.20701
darkorange	GO:0044389	MF	ubiquitin-like protein ligase binding	0.0221646	1	9	304	239	16762	2.07633
darkorange	GO:0019899	MF	enzyme binding	2.35834e-05	0.0167503	52	2196	239	16762	1.66073
darkorange	GO:0019901	MF	protein kinase binding	0.0267376	1	16	701	239	16762	1.60077
darkorange	GO:0019900	MF	kinase binding	0.0319936	1	17	776	239	16762	1.53644
darkorange	GO:0003676	MF	nucleic acid binding	7.94685e-05	0.0406916	59	2727	239	16762	1.51738
darkorange	GO:0044877	MF	protein-containing complex binding	0.0280803	1	24	1189	239	16762	1.41565
darkorange	GO:1901363	MF	heterocyclic compound binding	0.000369501	0.121428	83	4460	239	16762	1.30518
darkorange	GO:0097159	MF	organic cyclic compound binding	0.000614878	0.163911	83	4528	239	16762	1.28558
darkorange	GO:0005488	MF	binding	0.0117803	0.856053	165	11141	239	16762	1.03869
darkorange2	GO:0005114	MF	type II transforming growth factor beta receptor binding	0.00147746	1	2	7	149	16762	32.1419
darkorange2	GO:0072349	MF	modified amino acid transmembrane transporter activity	0.00465812	1	2	11	149	16762	20.4539
darkorange2	GO:0001224	MF	RNA polymerase II transcription cofactor binding	0.0489704	1	1	6	149	16762	18.7494
darkorange2	GO:0004568	MF	chitinase activity	0.0431531	1	1	6	149	16762	18.7494
darkorange2	GO:0008970	MF	phospholipase A1 activity	0.0455383	1	1	6	149	16762	18.7494
darkorange2	GO:0046912	MF	transferase activity, transferring acyl groups, acyl groups converted into alkyl on transfer	0.0484459	1	1	6	149	16762	18.7494
darkorange2	GO:0048273	MF	mitogen-activated protein kinase p38 binding	0.0490635	1	1	6	149	16762	18.7494
darkorange2	GO:0051185	MF	coenzyme transmembrane transporter activity	0.0448699	1	1	6	149	16762	18.7494
darkorange2	GO:0071532	MF	ankyrin repeat binding	0.0462449	1	1	6	149	16762	18.7494
darkorange2	GO:0004652	MF	polynucleotide adenylyltransferase activity	0.00566283	1	2	12	149	16762	18.7494
darkorange2	GO:0008432	MF	JUN kinase binding	0.00626662	1	2	14	149	16762	16.0709
darkorange2	GO:0051184	MF	cofactor transmembrane transporter activity	0.00855763	1	2	17	149	16762	13.2349
darkorange2	GO:0015101	MF	organic cation transmembrane transporter activity	0.00945669	1	2	17	149	16762	13.2349
darkorange2	GO:0005343	MF	organic acid:sodium symporter activity	0.01236	1	2	20	149	16762	11.2497
darkorange2	GO:0016709	MF	oxidoreductase activity, acting on paired donors, with incorporation or reduction of molecular oxygen, NAD(P)H as one donor, and incorporation of one atom of oxygen	0.0260438	1	2	29	149	16762	7.75839
darkorange2	GO:0070566	MF	adenylyltransferase activity	0.0307986	1	2	30	149	16762	7.49978
darkorange2	GO:0051059	MF	NF-kappaB binding	0.0309857	1	2	32	149	16762	7.03104
darkorange2	GO:0016836	MF	hydro-lyase activity	0.0109817	1	3	52	149	16762	6.49019
darkorange2	GO:0004896	MF	cytokine receptor activity	0.000975146	1	5	88	149	16762	6.39185
darkorange2	GO:0017112	MF	Rab guanyl-nucleotide exchange factor activity	0.039579	1	2	36	149	16762	6.24981
darkorange2	GO:0030145	MF	manganese ion binding	0.0129768	1	3	57	149	16762	5.92088
darkorange2	GO:0140375	MF	immune receptor activity	0.00181707	1	5	102	149	16762	5.51454
darkorange2	GO:0008028	MF	monocarboxylic acid transmembrane transporter activity	0.0496301	1	2	41	149	16762	5.48764
darkorange2	GO:0016835	MF	carbon-oxygen lyase activity	0.0187946	1	3	63	149	16762	5.35698
darkorange2	GO:0019955	MF	cytokine binding	0.00342439	1	5	116	149	16762	4.84899
darkorange2	GO:0008013	MF	beta-catenin binding	0.0323529	1	3	81	149	16762	4.16654
darkorange2	GO:0046332	MF	SMAD binding	0.0334105	1	3	82	149	16762	4.11573
darkorange2	GO:0033613	MF	activating transcription factor binding	0.0351928	1	3	82	149	16762	4.11573
darkorange2	GO:0005342	MF	organic acid transmembrane transporter activity	0.0213923	1	4	121	149	16762	3.7189
darkorange2	GO:0046943	MF	carboxylic acid transmembrane transporter activity	0.0213923	1	4	121	149	16762	3.7189
darkorange2	GO:0019838	MF	growth factor binding	0.0304178	1	4	138	149	16762	3.26077
darkorange2	GO:0031625	MF	ubiquitin protein ligase binding	0.0124838	1	7	286	149	16762	2.75341
darkorange2	GO:0044389	MF	ubiquitin-like protein ligase binding	0.0171958	1	7	304	149	16762	2.59038
darkorange2	GO:0061630	MF	ubiquitin protein ligase activity	0.0385108	1	5	221	149	16762	2.54517
darkorange2	GO:0061659	MF	ubiquitin-like protein ligase activity	0.0441929	1	5	229	149	16762	2.45626
darkorange2	GO:0004674	MF	protein serine/threonine kinase activity	0.02968	1	8	424	149	16762	2.12258
darkorange2	GO:0019901	MF	protein kinase binding	0.0381962	1	11	701	149	16762	1.76528
darkorange2	GO:0019900	MF	kinase binding	0.0345021	1	12	776	149	16762	1.73964
darkorange2	GO:0016740	MF	transferase activity	0.00495575	1	29	2082	149	16762	1.56696
darkorange2	GO:0046983	MF	protein dimerization activity	0.0438944	1	17	1263	149	16762	1.51421
darkorange2	GO:0019899	MF	enzyme binding	0.0330554	1	27	2196	149	16762	1.38316
darkred	GO:0140161	MF	monocarboxylate:sodium symporter activity	0.00031523	0.733622	3	8	314	16762	20.0183
darkred	GO:0070697	MF	activin receptor binding	0.0047475	1	2	6	314	16762	17.7941
darkred	GO:0005283	MF	amino acid:sodium symporter activity	0.000466467	0.733622	3	9	314	16762	17.7941
darkred	GO:0015355	MF	secondary active monocarboxylate transmembrane transporter activity	0.000466468	0.733622	3	9	314	16762	17.7941
darkred	GO:0005416	MF	amino acid:cation symporter activity	0.0015044	1	3	13	314	16762	12.319
darkred	GO:0071933	MF	Arp2/3 complex binding	0.0135654	1	2	10	314	16762	10.6764
darkred	GO:0033204	MF	ribonuclease P RNA binding	0.01357	1	2	10	314	16762	10.6764
darkred	GO:0005343	MF	organic acid:sodium symporter activity	0.000418891	0.733622	4	20	314	16762	10.6764
darkred	GO:0004549	MF	tRNA-specific ribonuclease activity	0.00282853	1	3	16	314	16762	10.0092
darkred	GO:0004526	MF	ribonuclease P activity	0.0163875	1	2	11	314	16762	9.70585
darkred	GO:0017154	MF	semaphorin receptor activity	0.0194316	1	2	12	314	16762	8.89703
darkred	GO:0005328	MF	neurotransmitter:sodium symporter activity	0.00401201	1	3	18	314	16762	8.89703
darkred	GO:0010181	MF	FMN binding	0.0261586	1	2	14	314	16762	7.62602
darkred	GO:0070006	MF	metalloaminopeptidase activity	0.026159	1	2	14	314	16762	7.62602
darkred	GO:0030275	MF	LRR domain binding	0.029825	1	2	15	314	16762	7.11762
darkred	GO:0016722	MF	oxidoreductase activity, oxidizing metal ions	0.0336814	1	2	16	314	16762	6.67277
darkred	GO:0004715	MF	non-membrane spanning protein tyrosine kinase activity	0.000959834	0.895427	5	42	314	16762	6.35502
darkred	GO:0015299	MF	solute:proton antiporter activity	0.0377208	1	2	17	314	16762	6.28025
darkred	GO:0016405	MF	CoA-ligase activity	0.0377142	1	2	17	314	16762	6.28025
darkred	GO:0004683	MF	calmodulin-dependent protein kinase activity	0.011482	1	3	26	314	16762	6.15948
darkred	GO:0070696	MF	transmembrane receptor protein serine/threonine kinase binding	0.041934	1	2	18	314	16762	5.93135
darkred	GO:0015020	MF	glucuronosyltransferase activity	0.0463144	1	2	19	314	16762	5.61918
darkred	GO:0005326	MF	neurotransmitter transmembrane transporter activity	0.00593529	1	4	40	314	16762	5.33822
darkred	GO:0005164	MF	tumor necrosis factor receptor binding	0.0169972	1	3	30	314	16762	5.33822
darkred	GO:0016875	MF	ligase activity, forming carbon-oxygen bonds	0.00648474	1	4	41	314	16762	5.20802
darkred	GO:0004812	MF	aminoacyl-tRNA ligase activity	0.00648474	1	4	41	314	16762	5.20802
darkred	GO:0008378	MF	galactosyltransferase activity	0.0202193	1	3	32	314	16762	5.00458
darkred	GO:0015370	MF	solute:sodium symporter activity	0.0129772	1	4	50	314	16762	4.27057
darkred	GO:0008028	MF	monocarboxylic acid transmembrane transporter activity	0.0385743	1	3	41	314	16762	3.90601
darkred	GO:0032813	MF	tumor necrosis factor receptor superfamily binding	0.0409993	1	3	42	314	16762	3.81301
darkred	GO:0140101	MF	catalytic activity, acting on a tRNA	0.00109803	0.895427	8	113	314	16762	3.77927
darkred	GO:0004222	MF	metalloendopeptidase activity	0.00516792	1	6	87	314	16762	3.68153
darkred	GO:0051087	MF	chaperone binding	0.00788592	1	6	95	314	16762	3.37151
darkred	GO:0017124	MF	SH3 domain binding	0.00840926	1	7	126	314	16762	2.96568
darkred	GO:0051082	MF	unfolded protein binding	0.0266341	1	5	92	314	16762	2.9012
darkred	GO:0015294	MF	solute:cation symporter activity	0.0499468	1	4	76	314	16762	2.80959
darkred	GO:0005125	MF	cytokine activity	0.00767678	1	8	155	314	16762	2.75521
darkred	GO:0004713	MF	protein tyrosine kinase activity	0.0244974	1	6	122	314	16762	2.62535
darkred	GO:0008237	MF	metallopeptidase activity	0.0216843	1	7	152	314	16762	2.45839
darkred	GO:0005126	MF	cytokine receptor binding	0.00567819	1	11	246	314	16762	2.38701
darkred	GO:0016874	MF	ligase activity	0.0375503	1	6	135	314	16762	2.37254
darkred	GO:0008236	MF	serine-type peptidase activity	0.0387061	1	6	136	314	16762	2.3551
darkred	GO:0017048	MF	Rho GTPase binding	0.0302321	1	7	163	314	16762	2.29249
darkred	GO:0016825	MF	hydrolase activity, acting on acid phosphorus-nitrogen bonds	0.0435607	1	6	140	314	16762	2.28781
darkred	GO:0017171	MF	serine hydrolase activity	0.0435607	1	6	140	314	16762	2.28781
darkred	GO:0016758	MF	transferase activity, transferring hexosyl groups	0.0440661	1	7	177	314	16762	2.11116
darkred	GO:0022853	MF	active ion transmembrane transporter activity	0.0496571	1	7	182	314	16762	2.05316
darkred	GO:0015077	MF	monovalent inorganic cation transmembrane transporter activity	0.0208624	1	11	297	314	16762	1.97712
darkred	GO:0070011	MF	peptidase activity, acting on L-amino acid peptides	0.00369667	1	18	486	314	16762	1.97712
darkred	GO:0004175	MF	endopeptidase activity	0.0181379	1	12	329	314	16762	1.94707
darkred	GO:0008047	MF	enzyme activator activity	0.0119199	1	15	426	314	16762	1.87965
darkred	GO:0008233	MF	peptidase activity	0.00628624	1	18	512	314	16762	1.87672
darkred	GO:0008324	MF	cation transmembrane transporter activity	0.0141349	1	17	516	314	16762	1.75871
darkred	GO:0022890	MF	inorganic cation transmembrane transporter activity	0.0288869	1	15	476	314	16762	1.68221
darkred	GO:0030234	MF	enzyme regulator activity	0.0229997	1	24	850	314	16762	1.50726
darkred	GO:0098772	MF	molecular function regulator	0.0259241	1	37	1460	314	16762	1.35284
darkred	GO:0019899	MF	enzyme binding	0.0286286	1	52	2196	314	16762	1.26406
darkred	GO:0140096	MF	catalytic activity, acting on a protein	0.0392	1	46	1944	314	16762	1.26316
darkred	GO:0016787	MF	hydrolase activity	0.0499546	1	50	2176	314	16762	1.22661
darkred	GO:0003824	MF	catalytic activity	0.0129709	1	111	5069	314	16762	1.16895
darkseagreen4	GO:0003680	MF	AT DNA binding	0.00103699	0.524769	2	9	87	16762	42.8148
darkseagreen4	GO:0051575	MF	5'-deoxyribose-5-phosphate lyase activity	0.031179	1	1	6	87	16762	32.1111
darkseagreen4	GO:0042979	MF	ornithine decarboxylase regulator activity	0.0295274	1	1	6	87	16762	32.1111
darkseagreen4	GO:0004726	MF	non-membrane spanning protein tyrosine phosphatase activity	0.0296719	1	1	6	87	16762	32.1111
darkseagreen4	GO:0019784	MF	NEDD8-specific protease activity	0.0287106	1	1	6	87	16762	32.1111
darkseagreen4	GO:0031956	MF	medium-chain fatty acid-CoA ligase activity	0.0334557	1	1	6	87	16762	32.1111
darkseagreen4	GO:0042500	MF	aspartic endopeptidase activity, intramembrane cleaving	0.0348272	1	1	6	87	16762	32.1111
darkseagreen4	GO:0050733	MF	RS domain binding	0.0295809	1	1	6	87	16762	32.1111
darkseagreen4	GO:0089720	MF	caspase binding	0.0281119	1	1	6	87	16762	32.1111
darkseagreen4	GO:0102391	MF	decanoate-CoA ligase activity	0.0334557	1	1	6	87	16762	32.1111
darkseagreen4	GO:0005159	MF	insulin-like growth factor receptor binding	0.00202598	0.544001	2	13	87	16762	29.641
darkseagreen4	GO:0071723	MF	lipopeptide binding	0.0378606	1	1	7	87	16762	27.5238
darkseagreen4	GO:0030274	MF	LIM domain binding	0.0325791	1	1	7	87	16762	27.5238
darkseagreen4	GO:0030628	MF	pre-mRNA 3'-splice site binding	0.0365126	1	1	7	87	16762	27.5238
darkseagreen4	GO:0031685	MF	adenosine receptor binding	0.0353628	1	1	7	87	16762	27.5238
darkseagreen4	GO:0005149	MF	interleukin-1 receptor binding	0.00241778	0.582054	2	14	87	16762	27.5238
darkseagreen4	GO:0097677	MF	STAT family protein binding	0.040658	1	1	8	87	16762	24.0833
darkseagreen4	GO:0004439	MF	phosphatidylinositol-4,5-bisphosphate 5-phosphatase activity	0.0428842	1	1	8	87	16762	24.0833
darkseagreen4	GO:0016803	MF	ether hydrolase activity	0.0368922	1	1	8	87	16762	24.0833
darkseagreen4	GO:0034595	MF	phosphatidylinositol phosphate 5-phosphatase activity	0.0428842	1	1	8	87	16762	24.0833
darkseagreen4	GO:0042834	MF	peptidoglycan binding	0.0425464	1	1	8	87	16762	24.0833
darkseagreen4	GO:0051379	MF	epinephrine binding	0.0400419	1	1	8	87	16762	24.0833
darkseagreen4	GO:0097602	MF	cullin family protein binding	0.00301708	0.59368	2	17	87	16762	22.6667
darkseagreen4	GO:0016801	MF	hydrolase activity, acting on ether bonds	0.0412416	1	1	9	87	16762	21.4074
darkseagreen4	GO:0004303	MF	estradiol 17-beta-dehydrogenase activity	0.0482333	1	1	10	87	16762	19.2667
darkseagreen4	GO:0015279	MF	store-operated calcium channel activity	0.0481115	1	1	10	87	16762	19.2667
darkseagreen4	GO:0005484	MF	SNAP receptor activity	0.0110968	0.817153	2	31	87	16762	12.4301
darkseagreen4	GO:0042169	MF	SH2 domain binding	0.0141736	0.864473	2	37	87	16762	10.4144
darkseagreen4	GO:0035064	MF	methylated histone binding	0.0366648	1	2	59	87	16762	6.53107
darkseagreen4	GO:0140034	MF	methylation-dependent protein binding	0.0366648	1	2	59	87	16762	6.53107
darkseagreen4	GO:0005080	MF	protein kinase C binding	0.0367041	1	2	60	87	16762	6.42222
darkseagreen4	GO:0051287	MF	NAD binding	0.0369477	1	2	60	87	16762	6.42222
darkseagreen4	GO:0032182	MF	ubiquitin-like protein binding	0.0110251	0.814603	3	93	87	16762	6.21505
darkseagreen4	GO:1990782	MF	protein tyrosine kinase binding	0.0127108	0.851307	3	95	87	16762	6.08421
darkseagreen4	GO:0030971	MF	receptor tyrosine kinase binding	0.0473401	1	2	68	87	16762	5.66667
darkseagreen4	GO:0043130	MF	ubiquitin binding	0.0485246	1	2	72	87	16762	5.35185
darkseagreen4	GO:0000149	MF	SNARE binding	0.0203075	0.987046	3	115	87	16762	5.02609
darkseagreen4	GO:0140030	MF	modification-dependent protein binding	0.0331733	1	3	137	87	16762	4.21898
darkseagreen4	GO:0008168	MF	methyltransferase activity	0.0136599	0.858924	4	184	87	16762	4.18841
darkseagreen4	GO:0008757	MF	S-adenosylmethionine-dependent methyltransferase activity	0.0337659	1	3	140	87	16762	4.12857
darkseagreen4	GO:0016741	MF	transferase activity, transferring one-carbon groups	0.0161998	0.9076	4	194	87	16762	3.97251
darkseagreen4	GO:0003924	MF	GTPase activity	0.0129089	0.853828	5	275	87	16762	3.50303
darkseagreen4	GO:0005525	MF	GTP binding	0.00705498	0.712553	6	333	87	16762	3.47147
darkseagreen4	GO:0032550	MF	purine ribonucleoside binding	0.00782416	0.758909	6	340	87	16762	3.4
darkseagreen4	GO:0001883	MF	purine nucleoside binding	0.0081471	0.770052	6	343	87	16762	3.37026
darkseagreen4	GO:0032549	MF	ribonucleoside binding	0.00813284	0.770052	6	343	87	16762	3.37026
darkseagreen4	GO:0001882	MF	nucleoside binding	0.0090108	0.770052	6	351	87	16762	3.29345
darkseagreen4	GO:0019001	MF	guanyl nucleotide binding	0.00913049	0.770052	6	352	87	16762	3.28409
darkseagreen4	GO:0032561	MF	guanyl ribonucleotide binding	0.00913049	0.770052	6	352	87	16762	3.28409
darkseagreen4	GO:0019901	MF	protein kinase binding	0.0254618	1	8	701	87	16762	2.19876
darkseagreen4	GO:0019900	MF	kinase binding	0.0430699	1	8	776	87	16762	1.98625
darkseagreen4	GO:0005102	MF	signaling receptor binding	0.0202308	0.985853	13	1367	87	16762	1.83224
darkseagreen4	GO:0000166	MF	nucleotide binding	0.0296272	1	16	1899	87	16762	1.62331
darkseagreen4	GO:1901265	MF	nucleoside phosphate binding	0.0296272	1	16	1899	87	16762	1.62331
darkseagreen4	GO:0003824	MF	catalytic activity	0.0346161	1	34	5069	87	16762	1.2923
darkslateblue	GO:0097027	MF	ubiquitin-protein transferase activator activity	0.00157207	1	2	8	129	16762	32.4845
darkslateblue	GO:0062061	MF	TAP complex binding	0.00201114	1	2	9	129	16762	28.8751
darkslateblue	GO:0071933	MF	Arp2/3 complex binding	0.00250138	1	2	10	129	16762	25.9876
darkslateblue	GO:0030881	MF	beta-2-microglobulin binding	0.00304199	1	2	11	129	16762	23.6251
darkslateblue	GO:0046977	MF	TAP binding	0.00304199	1	2	11	129	16762	23.6251
darkslateblue	GO:0042610	MF	CD8 receptor binding	0.00304199	1	2	11	129	16762	23.6251
darkslateblue	GO:0015038	MF	glutathione disulfide oxidoreductase activity	0.0449587	1	1	6	129	16762	21.6563
darkslateblue	GO:0047391	MF	alkylglycerophosphoethanolamine phosphodiesterase activity	0.0449587	1	1	6	129	16762	21.6563
darkslateblue	GO:0047631	MF	ADP-ribose diphosphatase activity	0.0449587	1	1	6	129	16762	21.6563
darkslateblue	GO:0062105	MF	RNA 2'-O-methyltransferase activity	0.0449587	1	1	6	129	16762	21.6563
darkslateblue	GO:0070568	MF	guanylyltransferase activity	0.0449587	1	1	6	129	16762	21.6563
darkslateblue	GO:0042608	MF	T cell receptor binding	0.00569259	1	2	15	129	16762	17.3251
darkslateblue	GO:0055106	MF	ubiquitin-protein transferase regulator activity	0.00817184	1	2	18	129	16762	14.4376
darkslateblue	GO:0042605	MF	peptide antigen binding	0.00123927	1	3	28	129	16762	13.9219
darkslateblue	GO:0003823	MF	antigen binding	0.00552052	1	3	47	129	16762	8.29391
darkslateblue	GO:0061980	MF	regulatory RNA binding	0.0323787	1	2	37	129	16762	7.02367
darkslateblue	GO:0003725	MF	double-stranded RNA binding	0.00342976	1	4	81	129	16762	6.41669
darkslateblue	GO:0140296	MF	general transcription initiation factor binding	0.0426261	1	2	43	129	16762	6.04363
darkslateblue	GO:0061630	MF	ubiquitin protein ligase activity	0.027336	1	5	221	129	16762	2.93977
darkslateblue	GO:0061659	MF	ubiquitin-like protein ligase activity	0.0311932	1	5	229	129	16762	2.83707
darkslateblue	GO:0005525	MF	GTP binding	0.0425901	1	6	333	129	16762	2.34122
darkslateblue	GO:0032550	MF	purine ribonucleoside binding	0.0463028	1	6	340	129	16762	2.29302
darkslateblue	GO:0001883	MF	purine nucleoside binding	0.0479539	1	6	343	129	16762	2.27297
darkslateblue	GO:0032549	MF	ribonucleoside binding	0.0479539	1	6	343	129	16762	2.27297
darkturquoise	GO:0035240	MF	dopamine binding	0.0038992	1	2	6	313	16762	17.8509
darkturquoise	GO:0008970	MF	phospholipase A1 activity	0.00389348	1	2	6	313	16762	17.8509
darkturquoise	GO:0003810	MF	protein-glutamine gamma-glutamyltransferase activity	0.00563852	1	2	7	313	16762	15.3008
darkturquoise	GO:0022841	MF	potassium ion leak channel activity	0.000660466	0.765376	3	11	313	16762	14.6053
darkturquoise	GO:0016755	MF	transferase activity, transferring amino-acyl groups	0.00110513	0.839063	3	13	313	16762	12.3583
darkturquoise	GO:0022840	MF	leak channel activity	0.0010973	0.839063	3	13	313	16762	12.3583
darkturquoise	GO:0022842	MF	narrow pore channel activity	0.0010973	0.839063	3	13	313	16762	12.3583
darkturquoise	GO:0047498	MF	calcium-dependent phospholipase A2 activity	0.0117952	1	2	10	313	16762	10.7105
darkturquoise	GO:1901338	MF	catecholamine binding	0.0136352	1	2	11	313	16762	9.73686
darkturquoise	GO:0001054	MF	RNA polymerase I activity	0.0186992	1	2	13	313	16762	8.23888
darkturquoise	GO:0004806	MF	triglyceride lipase activity	0.0210338	1	2	14	313	16762	7.65039
darkturquoise	GO:0051428	MF	peptide hormone receptor binding	0.0243665	1	2	15	313	16762	7.14036
darkturquoise	GO:0140272	MF	exogenous protein binding	0.0356595	1	2	18	313	16762	5.9503
darkturquoise	GO:0001618	MF	virus receptor activity	0.0356595	1	2	18	313	16762	5.9503
darkturquoise	GO:0005179	MF	hormone activity	0.000189422	0.472796	7	73	313	16762	5.13519
darkturquoise	GO:0005267	MF	potassium channel activity	0.00022491	0.495207	8	98	313	16762	4.37165
darkturquoise	GO:0005249	MF	voltage-gated potassium channel activity	0.00454342	1	5	65	313	16762	4.11944
darkturquoise	GO:0015459	MF	potassium channel regulator activity	0.0274051	1	3	40	313	16762	4.01645
darkturquoise	GO:0035255	MF	ionotropic glutamate receptor binding	0.0308209	1	3	41	313	16762	3.91849
darkturquoise	GO:0050661	MF	NADP binding	0.036483	1	3	44	313	16762	3.65132
darkturquoise	GO:0005546	MF	phosphatidylinositol-4,5-bisphosphate binding	0.00809814	1	5	75	313	16762	3.57018
darkturquoise	GO:0015079	MF	potassium ion transmembrane transporter activity	0.00142423	0.929096	8	129	313	16762	3.3211
darkturquoise	GO:0004869	MF	cysteine-type endopeptidase inhibitor activity	0.0477794	1	3	49	313	16762	3.27874
darkturquoise	GO:0005507	MF	copper ion binding	0.0487873	1	3	50	313	16762	3.21316
darkturquoise	GO:0005244	MF	voltage-gated ion channel activity	0.00143423	0.929096	9	160	313	16762	3.01234
darkturquoise	GO:0022832	MF	voltage-gated channel activity	0.00143423	0.929096	9	160	313	16762	3.01234
darkturquoise	GO:0099106	MF	ion channel regulator activity	0.0195478	1	5	94	313	16762	2.84855
darkturquoise	GO:0022843	MF	voltage-gated cation channel activity	0.012137	1	6	114	313	16762	2.81856
darkturquoise	GO:0052689	MF	carboxylic ester hydrolase activity	0.0117502	1	6	114	313	16762	2.81856
darkturquoise	GO:0016298	MF	lipase activity	0.0240845	1	5	98	313	16762	2.73228
darkturquoise	GO:0016247	MF	channel regulator activity	0.013824	1	6	118	313	16762	2.72302
darkturquoise	GO:0004620	MF	phospholipase activity	0.0430719	1	4	79	313	16762	2.71153
darkturquoise	GO:0033613	MF	activating transcription factor binding	0.0477991	1	4	82	313	16762	2.61233
darkturquoise	GO:0044325	MF	ion channel binding	0.0169388	1	6	123	313	16762	2.61233
darkturquoise	GO:1902936	MF	phosphatidylinositol bisphosphate binding	0.0301422	1	5	105	313	16762	2.55013
darkturquoise	GO:0004866	MF	endopeptidase inhibitor activity	0.0209407	1	6	129	313	16762	2.49082
darkturquoise	GO:0061135	MF	endopeptidase regulator activity	0.0261997	1	6	136	313	16762	2.36262
darkturquoise	GO:0030414	MF	peptidase inhibitor activity	0.0270041	1	6	137	313	16762	2.34537
darkturquoise	GO:0000149	MF	SNARE binding	0.0418339	1	5	115	313	16762	2.32838
darkturquoise	GO:0022836	MF	gated channel activity	0.01408	1	10	267	313	16762	2.00572
darkturquoise	GO:0005261	MF	cation channel activity	0.014604	1	10	268	313	16762	1.99824
darkturquoise	GO:0022803	MF	passive transmembrane transporter activity	0.00823633	1	13	365	313	16762	1.90736
darkturquoise	GO:0015267	MF	channel activity	0.00823633	1	13	365	313	16762	1.90736
darkturquoise	GO:0005216	MF	ion channel activity	0.0112166	1	12	338	313	16762	1.90128
darkturquoise	GO:0004930	MF	G protein-coupled receptor activity	0.0156193	1	11	314	313	16762	1.87605
darkturquoise	GO:0005509	MF	calcium ion binding	0.00730881	1	17	532	313	16762	1.71127
darkturquoise	GO:0048018	MF	receptor ligand activity	0.0317514	1	11	349	313	16762	1.68791
darkturquoise	GO:0030546	MF	signaling receptor activator activity	0.0351954	1	11	355	313	16762	1.65938
darkturquoise	GO:0004175	MF	endopeptidase activity	0.0469325	1	10	329	313	16762	1.62774
floralwhite	GO:0004528	MF	phosphodiesterase I activity	0.0491623	1	1	6	151	16762	18.5011
floralwhite	GO:0043426	MF	MRF binding	0.0495876	1	1	6	151	16762	18.5011
floralwhite	GO:0051010	MF	microtubule plus-end binding	0.00809282	1	2	16	151	16762	13.8758
floralwhite	GO:0008409	MF	5'-3' exonuclease activity	0.00917031	1	2	17	151	16762	13.0596
floralwhite	GO:0015026	MF	coreceptor activity	0.0141636	1	2	21	151	16762	10.5721
floralwhite	GO:0042974	MF	retinoic acid receptor binding	0.00279566	1	3	33	151	16762	10.0915
floralwhite	GO:0046965	MF	retinoid X receptor binding	0.0166542	1	2	23	151	16762	9.65275
floralwhite	GO:0031683	MF	G-protein beta/gamma-subunit complex binding	0.0178585	1	2	24	151	16762	9.25055
floralwhite	GO:0046966	MF	thyroid hormone receptor binding	0.0192234	1	2	25	151	16762	8.88053
floralwhite	GO:0071889	MF	14-3-3 protein binding	0.0251059	1	2	29	151	16762	7.65563
floralwhite	GO:0043014	MF	alpha-tubulin binding	0.0359549	1	2	35	151	16762	6.34324
floralwhite	GO:0000993	MF	RNA polymerase II complex binding	0.0376347	1	2	36	151	16762	6.16703
floralwhite	GO:0004520	MF	endodeoxyribonuclease activity	0.0398745	1	2	37	151	16762	6.00036
floralwhite	GO:0042169	MF	SH2 domain binding	0.0399066	1	2	37	151	16762	6.00036
floralwhite	GO:0016684	MF	oxidoreductase activity, acting on peroxide as acceptor	0.0463112	1	2	40	151	16762	5.55033
floralwhite	GO:0043175	MF	RNA polymerase core enzyme binding	0.0478296	1	2	41	151	16762	5.41496
floralwhite	GO:0070851	MF	growth factor receptor binding	0.00533422	1	5	130	151	16762	4.26949
floralwhite	GO:0004843	MF	thiol-dependent ubiquitin-specific protease activity	0.0328988	1	3	81	151	16762	4.11136
floralwhite	GO:0036459	MF	thiol-dependent ubiquitinyl hydrolase activity	0.0415709	1	3	89	151	16762	3.7418
floralwhite	GO:0101005	MF	ubiquitinyl hydrolase activity	0.0428027	1	3	90	151	16762	3.70022
floralwhite	GO:0008083	MF	growth factor activity	0.020703	1	4	121	151	16762	3.66964
floralwhite	GO:0005088	MF	Ras guanyl-nucleotide exchange factor activity	0.022411	1	4	124	151	16762	3.58086
floralwhite	GO:0017124	MF	SH3 domain binding	0.0231967	1	4	126	151	16762	3.52402
floralwhite	GO:0030234	MF	enzyme regulator activity	0.0314263	1	13	850	151	16762	1.69775
floralwhite	GO:0098772	MF	molecular function regulator	0.0250069	1	20	1460	151	16762	1.52064
floralwhite	GO:0005515	MF	protein binding	0.0270009	1	80	7916	151	16762	1.12185
floralwhite	GO:0005488	MF	binding	0.0393295	1	106	11141	151	16762	1.05616
green	GO:0004565	MF	beta-galactosidase activity	0.0135798	1	2	6	590	16762	9.47006
green	GO:0005432	MF	calcium:sodium antiporter activity	0.0249257	1	2	8	590	16762	7.10254
green	GO:0015925	MF	galactosidase activity	0.0242483	1	2	8	590	16762	7.10254
green	GO:0045159	MF	myosin II binding	0.0248686	1	2	8	590	16762	7.10254
green	GO:0030247	MF	polysaccharide binding	0.00165242	1	4	17	590	16762	6.68475
green	GO:0005313	MF	L-glutamate transmembrane transporter activity	0.00708219	1	3	13	590	16762	6.55619
green	GO:0015368	MF	calcium:cation antiporter activity	0.0312061	1	2	9	590	16762	6.31337
green	GO:0086080	MF	protein binding involved in heterotypic cell-cell adhesion	0.0310055	1	2	9	590	16762	6.31337
green	GO:0015172	MF	acidic amino acid transmembrane transporter activity	0.00879536	1	3	14	590	16762	6.08789
green	GO:0015278	MF	calcium-release channel activity	0.00268698	1	4	19	590	16762	5.98109
green	GO:0005550	MF	pheromone binding	0.045659	1	2	11	590	16762	5.16549
green	GO:0004954	MF	prostanoid receptor activity	0.0448276	1	2	11	590	16762	5.16549
green	GO:0005184	MF	neuropeptide hormone activity	0.0151041	1	3	17	590	16762	5.01356
green	GO:0008143	MF	poly(A) binding	0.00538497	1	4	23	590	16762	4.9409
green	GO:0099604	MF	ligand-gated calcium channel activity	0.00653844	1	4	24	590	16762	4.73503
green	GO:0005217	MF	intracellular ligand-gated ion channel activity	0.0086507	1	4	26	590	16762	4.3708
green	GO:0030020	MF	extracellular matrix structural constituent conferring tensile strength	0.00580152	1	5	37	590	16762	3.83921
green	GO:0070717	MF	poly-purine tract binding	0.0158746	1	4	31	590	16762	3.66583
green	GO:0005227	MF	calcium activated cation channel activity	0.0386538	1	3	24	590	16762	3.55127
green	GO:0005245	MF	voltage-gated calcium channel activity	0.0100092	1	5	42	590	16762	3.38216
green	GO:0071949	MF	FAD binding	0.0215003	1	4	34	590	16762	3.34237
green	GO:0008227	MF	G protein-coupled amine receptor activity	0.0473974	1	3	26	590	16762	3.2781
green	GO:0005262	MF	calcium channel activity	0.000109345	0.601888	12	104	590	16762	3.2781
green	GO:0072509	MF	divalent inorganic cation transmembrane transporter activity	0.023784	1	4	35	590	16762	3.24688
green	GO:0015085	MF	calcium ion transmembrane transporter activity	0.000100733	0.601888	13	119	590	16762	3.10363
green	GO:0005549	MF	odorant binding	0.031476	1	4	38	590	16762	2.99054
green	GO:0005326	MF	neurotransmitter transmembrane transporter activity	0.0368541	1	4	40	590	16762	2.84102
green	GO:0015179	MF	L-amino acid transmembrane transporter activity	0.0208227	1	5	50	590	16762	2.84102
green	GO:0005179	MF	hormone activity	0.00799398	1	7	73	590	16762	2.72426
green	GO:0050840	MF	extracellular matrix binding	0.0270404	1	5	54	590	16762	2.63057
green	GO:0005518	MF	collagen binding	0.0164735	1	6	65	590	16762	2.62248
green	GO:0099094	MF	ligand-gated cation channel activity	0.0110171	1	7	77	590	16762	2.58274
green	GO:0033293	MF	monocarboxylic acid binding	0.0360093	1	5	58	590	16762	2.44915
green	GO:0015171	MF	amino acid transmembrane transporter activity	0.0442489	1	5	61	590	16762	2.3287
green	GO:0015276	MF	ligand-gated ion channel activity	0.0141007	1	8	100	590	16762	2.27281
green	GO:0022834	MF	ligand-gated channel activity	0.0165892	1	8	103	590	16762	2.20662
green	GO:0022843	MF	voltage-gated cation channel activity	0.0281799	1	8	114	590	16762	1.9937
green	GO:0005201	MF	extracellular matrix structural constituent	0.0230869	1	9	131	590	16762	1.95184
green	GO:0022803	MF	passive transmembrane transporter activity	0.000255312	0.660122	25	365	590	16762	1.9459
green	GO:0015267	MF	channel activity	0.000255312	0.660122	25	365	590	16762	1.9459
green	GO:0022836	MF	gated channel activity	0.00214818	1	18	267	590	16762	1.91529
green	GO:0005261	MF	cation channel activity	0.00224119	1	18	268	590	16762	1.90815
green	GO:0008201	MF	heparin binding	0.0283963	1	9	136	590	16762	1.88008
green	GO:0005216	MF	ion channel activity	0.00115188	1	22	338	590	16762	1.84918
green	GO:0004930	MF	G protein-coupled receptor activity	0.00240475	1	20	314	590	16762	1.80956
green	GO:0046873	MF	metal ion transmembrane transporter activity	0.00214885	1	22	355	590	16762	1.76063
green	GO:0005539	MF	glycosaminoglycan binding	0.0297635	1	11	182	590	16762	1.7171
green	GO:0004888	MF	transmembrane signaling receptor activity	0.000449252	0.726816	38	677	590	16762	1.59466
green	GO:0015318	MF	inorganic molecular entity transmembrane transporter activity	0.00158578	1	35	651	590	16762	1.52743
green	GO:0030546	MF	signaling receptor activator activity	0.0180854	1	19	355	590	16762	1.52054
green	GO:0060089	MF	molecular transducer activity	0.000845402	0.930687	43	823	590	16762	1.48437
green	GO:0038023	MF	signaling receptor activity	0.000845402	0.930687	43	823	590	16762	1.48437
green	GO:0048018	MF	receptor ligand activity	0.0290195	1	18	349	590	16762	1.46528
green	GO:0022890	MF	inorganic cation transmembrane transporter activity	0.016962	1	24	476	590	16762	1.43245
green	GO:0030545	MF	receptor regulator activity	0.0325416	1	19	379	590	16762	1.42426
green	GO:0022857	MF	transmembrane transporter activity	0.00219194	1	42	839	590	16762	1.4222
green	GO:0015075	MF	ion transmembrane transporter activity	0.00790857	1	34	695	590	16762	1.38985
green	GO:0008324	MF	cation transmembrane transporter activity	0.0232544	1	25	516	590	16762	1.37646
green	GO:0005215	MF	transporter activity	0.00428294	1	45	949	590	16762	1.34716
green	GO:0005509	MF	calcium ion binding	0.0313466	1	25	532	590	16762	1.33506
greenyellow	GO:0003997	MF	acyl-CoA oxidase activity	0.0092965	1	2	6	436	16762	12.815
greenyellow	GO:0015114	MF	phosphate ion transmembrane transporter activity	0.00897668	1	2	6	436	16762	12.815
greenyellow	GO:0016421	MF	CoA carboxylase activity	0.00876632	1	2	6	436	16762	12.815
greenyellow	GO:0019763	MF	immunoglobulin receptor activity	0.00918331	1	2	6	436	16762	12.815
greenyellow	GO:0019864	MF	IgG binding	0.00901982	1	2	6	436	16762	12.815
greenyellow	GO:0048039	MF	ubiquinone binding	0.00962932	1	2	6	436	16762	12.815
greenyellow	GO:0016634	MF	oxidoreductase activity, acting on the CH-CH group of donors, oxygen as acceptor	0.00126595	1	3	9	436	16762	12.815
greenyellow	GO:0016885	MF	ligase activity, forming carbon-carbon bonds	0.0121043	1	2	7	436	16762	10.9843
greenyellow	GO:0017151	MF	DEAD/H-box RNA helicase binding	0.016656	1	2	8	436	16762	9.61124
greenyellow	GO:0004143	MF	diacylglycerol kinase activity	0.0259499	1	2	10	436	16762	7.68899
greenyellow	GO:0010857	MF	calcium-dependent protein kinase activity	0.0254004	1	2	10	436	16762	7.68899
greenyellow	GO:0016846	MF	carbon-sulfur lyase activity	0.0314428	1	2	11	436	16762	6.98999
greenyellow	GO:0043008	MF	ATP-dependent protein binding	0.0301047	1	2	11	436	16762	6.98999
greenyellow	GO:0043560	MF	insulin receptor substrate binding	0.031177	1	2	11	436	16762	6.98999
greenyellow	GO:0031994	MF	insulin-like growth factor I binding	0.0314932	1	2	11	436	16762	6.98999
greenyellow	GO:0051011	MF	microtubule minus-end binding	0.037713	1	2	12	436	16762	6.40749
greenyellow	GO:0008574	MF	ATP-dependent microtubule motor activity, plus-end-directed	0.00345909	1	4	25	436	16762	6.15119
greenyellow	GO:0045504	MF	dynein heavy chain binding	0.0492335	1	2	14	436	16762	5.49214
greenyellow	GO:0015605	MF	organophosphate ester transmembrane transporter activity	0.0179832	1	3	22	436	16762	5.24249
greenyellow	GO:0005272	MF	sodium channel activity	0.0104044	1	4	34	436	16762	4.52294
greenyellow	GO:0004364	MF	glutathione transferase activity	0.0402905	1	3	30	436	16762	3.8445
greenyellow	GO:0030507	MF	spectrin binding	0.0445545	1	3	31	436	16762	3.72048
greenyellow	GO:0030332	MF	cyclin binding	0.0482415	1	3	32	436	16762	3.60421
greenyellow	GO:0016409	MF	palmitoyltransferase activity	0.0480388	1	3	32	436	16762	3.60421
greenyellow	GO:1990939	MF	ATP-dependent microtubule motor activity	0.0235797	1	4	43	436	16762	3.57627
greenyellow	GO:0001046	MF	core promoter sequence-specific DNA binding	0.0311947	1	4	47	436	16762	3.27191
greenyellow	GO:0003777	MF	microtubule motor activity	0.0121138	1	6	75	436	16762	3.0756
greenyellow	GO:0003774	MF	motor activity	0.00304692	1	9	117	436	16762	2.9573
greenyellow	GO:0004713	MF	protein tyrosine kinase activity	0.0374638	1	7	122	436	16762	2.20586
greenyellow	GO:0030695	MF	GTPase regulator activity	0.0051264	1	14	249	436	16762	2.16156
greenyellow	GO:0005096	MF	GTPase activator activity	0.0164033	1	12	231	436	16762	1.99714
greenyellow	GO:0060589	MF	nucleoside-triphosphatase regulator activity	0.0167537	1	14	287	436	16762	1.87536
greenyellow	GO:0042277	MF	peptide binding	0.0262869	1	12	247	436	16762	1.86777
greenyellow	GO:0016773	MF	phosphotransferase activity, alcohol group as acceptor	0.00183365	1	30	662	436	16762	1.74222
greenyellow	GO:0004674	MF	protein serine/threonine kinase activity	0.0133301	1	19	424	436	16762	1.72277
greenyellow	GO:0016772	MF	transferase activity, transferring phosphorus-containing groups	0.000959257	1	38	872	436	16762	1.67535
greenyellow	GO:0004672	MF	protein kinase activity	0.0114052	1	24	567	436	16762	1.6273
greenyellow	GO:0016301	MF	kinase activity	0.00579283	1	30	717	436	16762	1.60858
greenyellow	GO:0008047	MF	enzyme activator activity	0.0482699	1	17	426	436	16762	1.53419
greenyellow	GO:0003700	MF	DNA-binding transcription factor activity	0.036911	1	30	833	436	16762	1.38457
greenyellow	GO:0016740	MF	transferase activity	0.0142462	1	69	2082	436	16762	1.27411
greenyellow	GO:0003824	MF	catalytic activity	0.0062724	1	154	5069	436	16762	1.16799
grey60	GO:0010851	MF	cyclase regulator activity	0.00573402	1	2	6	382	16762	14.6265
grey60	GO:0016907	MF	G protein-coupled acetylcholine receptor activity	0.00512664	1	2	6	382	16762	14.6265
grey60	GO:0062105	MF	RNA 2'-O-methyltransferase activity	0.0061221	1	2	6	382	16762	14.6265
grey60	GO:0047498	MF	calcium-dependent phospholipase A2 activity	0.0175302	1	2	10	382	16762	8.77592
grey60	GO:0030553	MF	cGMP binding	0.0184206	1	2	11	382	16762	7.97811
grey60	GO:0016840	MF	carbon-nitrogen lyase activity	0.0242256	1	2	12	382	16762	7.31326
grey60	GO:0005522	MF	profilin binding	0.0241521	1	2	12	382	16762	7.31326
grey60	GO:0015271	MF	outward rectifier potassium channel activity	0.0274912	1	2	13	382	16762	6.7507
grey60	GO:0030296	MF	protein tyrosine kinase activator activity	0.0357395	1	2	15	382	16762	5.85061
grey60	GO:0005251	MF	delayed rectifier potassium channel activity	0.00990185	1	3	23	382	16762	5.72342
grey60	GO:0004993	MF	G protein-coupled serotonin receptor activity	0.0403944	1	2	16	382	16762	5.48495
grey60	GO:0099589	MF	serotonin receptor activity	0.0403944	1	2	16	382	16762	5.48495
grey60	GO:0015464	MF	acetylcholine receptor activity	0.0456233	1	2	17	382	16762	5.1623
grey60	GO:0030506	MF	ankyrin binding	0.0448096	1	2	17	382	16762	5.1623
grey60	GO:0030551	MF	cyclic nucleotide binding	0.0181221	1	3	28	382	16762	4.70138
grey60	GO:0005109	MF	frizzled binding	0.00780847	1	4	38	382	16762	4.6189
grey60	GO:0098960	MF	postsynaptic neurotransmitter receptor activity	0.0254861	1	4	55	382	16762	3.19124
grey60	GO:0004252	MF	serine-type endopeptidase activity	0.00241759	0.886679	8	115	382	16762	3.05249
grey60	GO:0005179	MF	hormone activity	0.0151369	1	5	73	382	16762	3.00545
grey60	GO:0008236	MF	serine-type peptidase activity	0.00657734	1	8	136	382	16762	2.58115
grey60	GO:0016825	MF	hydrolase activity, acting on acid phosphorus-nitrogen bonds	0.00763641	1	8	140	382	16762	2.5074
grey60	GO:0017171	MF	serine hydrolase activity	0.00763641	1	8	140	382	16762	2.5074
grey60	GO:0048018	MF	receptor ligand activity	0.000824394	0.698135	17	349	382	16762	2.1374
grey60	GO:0030546	MF	signaling receptor activator activity	0.000997337	0.724374	17	355	382	16762	2.10128
grey60	GO:0030545	MF	receptor regulator activity	0.000783147	0.689734	18	379	382	16762	2.08399
grey60	GO:0005125	MF	cytokine activity	0.0392836	1	7	155	382	16762	1.98166
grey60	GO:0000981	MF	DNA-binding transcription factor activity, RNA polymerase II-specific	0.00551655	1	23	633	382	16762	1.59436
grey60	GO:0001228	MF	DNA-binding transcription activator activity, RNA polymerase II-specific	0.0333084	1	13	359	382	16762	1.58895
grey60	GO:0001216	MF	DNA-binding transcription activator activity	0.0339073	1	13	360	382	16762	1.58454
grey60	GO:0000977	MF	RNA polymerase II transcription regulatory region sequence-specific DNA binding	0.0103888	1	23	669	382	16762	1.50857
grey60	GO:0003700	MF	DNA-binding transcription factor activity	0.0064102	1	28	833	382	16762	1.47494
grey60	GO:0004888	MF	transmembrane signaling receptor activity	0.0199253	1	22	677	382	16762	1.42592
grey60	GO:0000976	MF	transcription regulatory region sequence-specific DNA binding	0.0200319	1	23	712	382	16762	1.41746
grey60	GO:0001067	MF	regulatory region nucleic acid binding	0.021258	1	23	716	382	16762	1.40954
grey60	GO:0060089	MF	molecular transducer activity	0.0166409	1	26	823	382	16762	1.38623
grey60	GO:0038023	MF	signaling receptor activity	0.0166409	1	26	823	382	16762	1.38623
grey60	GO:1990837	MF	sequence-specific double-stranded DNA binding	0.0354989	1	23	754	382	16762	1.3385
grey60	GO:0140110	MF	transcription regulator activity	0.0226409	1	34	1171	382	16762	1.27404
honeydew1	GO:0051575	MF	5'-deoxyribose-5-phosphate lyase activity	0.034055	1	1	6	91	16762	30.6996
honeydew1	GO:0004128	MF	cytochrome-b5 reductase activity, acting on NAD(P)H	0.0341644	1	1	6	91	16762	30.6996
honeydew1	GO:0008312	MF	7S RNA binding	0.0294523	1	1	6	91	16762	30.6996
honeydew1	GO:0016453	MF	C-acetyltransferase activity	0.0288358	1	1	6	91	16762	30.6996
honeydew1	GO:0019966	MF	interleukin-1 binding	0.034088	1	1	6	91	16762	30.6996
honeydew1	GO:0047499	MF	calcium-independent phospholipase A2 activity	0.0325572	1	1	6	91	16762	30.6996
honeydew1	GO:0031730	MF	CCR5 chemokine receptor binding	0.0365307	1	1	7	91	16762	26.314
honeydew1	GO:0050291	MF	sphingosine N-acyltransferase activity	0.0371508	1	1	7	91	16762	26.314
honeydew1	GO:0097322	MF	7SK snRNA binding	0.0340883	1	1	7	91	16762	26.314
honeydew1	GO:1990459	MF	transferrin receptor binding	0.0376272	1	1	7	91	16762	26.314
honeydew1	GO:0016624	MF	oxidoreductase activity, acting on the aldehyde or oxo group of donors, disulfide as acceptor	0.0413964	1	1	8	91	16762	23.0247
honeydew1	GO:0031698	MF	beta-2 adrenergic receptor binding	0.0454243	1	1	8	91	16762	23.0247
honeydew1	GO:0003988	MF	acetyl-CoA C-acyltransferase activity	0.0471687	1	1	9	91	16762	20.4664
honeydew1	GO:0009931	MF	calcium-dependent protein serine/threonine kinase activity	0.0496806	1	1	9	91	16762	20.4664
honeydew1	GO:0035252	MF	UDP-xylosyltransferase activity	0.0496648	1	1	9	91	16762	20.4664
honeydew1	GO:0031386	MF	protein tag	0.0499434	1	1	10	91	16762	18.4198
honeydew1	GO:0017025	MF	TBP-class protein binding	0.00669301	1	2	23	91	16762	16.0172
honeydew1	GO:0046965	MF	retinoid X receptor binding	0.0069443	1	2	23	91	16762	16.0172
honeydew1	GO:0003743	MF	translation initiation factor activity	0.000101228	0.44577	4	46	91	16762	16.0172
honeydew1	GO:0030515	MF	snoRNA binding	0.00648602	1	2	25	91	16762	14.7358
honeydew1	GO:0140296	MF	general transcription initiation factor binding	0.00158902	1	3	43	91	16762	12.851
honeydew1	GO:0005154	MF	epidermal growth factor receptor binding	0.0135879	1	2	32	91	16762	11.5124
honeydew1	GO:0042974	MF	retinoic acid receptor binding	0.0133955	1	2	33	91	16762	11.1635
honeydew1	GO:0008135	MF	translation factor activity, RNA binding	0.000678039	1	4	76	91	16762	9.69462
honeydew1	GO:0090079	MF	translation regulator activity, nucleic acid binding	0.00150537	1	4	94	91	16762	7.8382
honeydew1	GO:0003725	MF	double-stranded RNA binding	0.00899529	1	3	81	91	16762	6.82214
honeydew1	GO:0001098	MF	basal transcription machinery binding	0.0325415	1	2	55	91	16762	6.6981
honeydew1	GO:0001099	MF	basal RNA polymerase II transcription machinery binding	0.0325415	1	2	55	91	16762	6.6981
honeydew1	GO:0045182	MF	translation regulator activity	0.00434639	1	4	125	91	16762	5.89433
honeydew1	GO:0003724	MF	RNA helicase activity	0.0433502	1	2	63	91	16762	5.84755
honeydew1	GO:0070851	MF	growth factor receptor binding	0.0332525	1	3	130	91	16762	4.25072
honeydew1	GO:0043021	MF	ribonucleoprotein complex binding	0.0374937	1	3	143	91	16762	3.86429
honeydew1	GO:0004386	MF	helicase activity	0.0495535	1	3	154	91	16762	3.58827
honeydew1	GO:0140098	MF	catalytic activity, acting on RNA	0.0360685	1	5	340	91	16762	2.70879
honeydew1	GO:0003723	MF	RNA binding	0.000740158	1	14	1002	91	16762	2.57362
honeydew1	GO:0032553	MF	ribonucleotide binding	0.00306646	1	18	1690	91	16762	1.96187
honeydew1	GO:0032555	MF	purine ribonucleotide binding	0.00660937	1	17	1676	91	16762	1.86835
honeydew1	GO:0017076	MF	purine nucleotide binding	0.00698099	1	17	1687	91	16762	1.85617
honeydew1	GO:0035639	MF	purine ribonucleoside triphosphate binding	0.0106136	1	16	1616	91	16762	1.82374
honeydew1	GO:0032559	MF	adenyl ribonucleotide binding	0.0283726	1	13	1366	91	16762	1.75298
honeydew1	GO:0000166	MF	nucleotide binding	0.0101619	1	18	1899	91	16762	1.74595
honeydew1	GO:1901265	MF	nucleoside phosphate binding	0.0101619	1	18	1899	91	16762	1.74595
honeydew1	GO:0030554	MF	adenyl nucleotide binding	0.0296145	1	13	1376	91	16762	1.74024
honeydew1	GO:0008144	MF	drug binding	0.0265687	1	14	1503	91	16762	1.71575
honeydew1	GO:0097367	MF	carbohydrate derivative binding	0.013309	1	18	1957	91	16762	1.69421
honeydew1	GO:0005524	MF	ATP binding	0.0452216	1	12	1313	91	16762	1.68345
honeydew1	GO:0036094	MF	small molecule binding	0.0202723	1	19	2199	91	16762	1.59152
honeydew1	GO:0003676	MF	nucleic acid binding	0.0144261	1	23	2727	91	16762	1.55356
honeydew1	GO:1901363	MF	heterocyclic compound binding	0.00317494	1	36	4460	91	16762	1.4868
honeydew1	GO:0043168	MF	anion binding	0.0339338	1	20	2480	91	16762	1.48547
honeydew1	GO:0097159	MF	organic cyclic compound binding	0.00414853	1	36	4528	91	16762	1.46447
ivory	GO:0005041	MF	low-density lipoprotein particle receptor activity	0.00325779	1	2	10	152	16762	22.0553
ivory	GO:0034450	MF	ubiquitin-ubiquitin ligase activity	0.00415549	1	2	11	152	16762	20.0502
ivory	GO:0030228	MF	lipoprotein particle receptor activity	0.00860509	1	2	16	152	16762	13.7845
ivory	GO:0070577	MF	lysine-acetylated histone binding	0.0101337	1	2	17	152	16762	12.9737
ivory	GO:0140033	MF	acetylation-dependent protein binding	0.0101337	1	2	17	152	16762	12.9737
ivory	GO:0004860	MF	protein kinase inhibitor activity	0.00118427	1	4	51	152	16762	8.64912
ivory	GO:0019210	MF	kinase inhibitor activity	0.00165364	1	4	56	152	16762	7.87688
ivory	GO:0005048	MF	signal sequence binding	0.03895	1	2	35	152	16762	6.3015
ivory	GO:0051087	MF	chaperone binding	0.00168167	1	5	95	152	16762	5.80402
ivory	GO:0051539	MF	4 iron, 4 sulfur cluster binding	0.0467238	1	2	39	152	16762	5.6552
ivory	GO:0003724	MF	RNA helicase activity	0.01902	1	3	63	152	16762	5.25125
ivory	GO:0060090	MF	molecular adaptor activity	0.00417486	1	7	224	152	16762	3.44613
ivory	GO:0140030	MF	modification-dependent protein binding	0.0347887	1	4	137	152	16762	3.21975
ivory	GO:0043021	MF	ribonucleoprotein complex binding	0.0385747	1	4	143	152	16762	3.08465
ivory	GO:0030674	MF	protein-macromolecule adaptor activity	0.0226796	1	5	179	152	16762	3.08034
ivory	GO:0004857	MF	enzyme inhibitor activity	0.0178178	1	7	297	152	16762	2.59911
ivory	GO:0003723	MF	RNA binding	0.00357498	1	18	1002	152	16762	1.98101
ivory	GO:0030234	MF	enzyme regulator activity	0.00924003	1	15	850	152	16762	1.94605
ivory	GO:0098772	MF	molecular function regulator	0.0365811	1	20	1460	152	16762	1.51063
ivory	GO:0042802	MF	identical protein binding	0.0364773	1	23	1735	152	16762	1.46188
lavenderblush3	GO:0005536	MF	glucose binding	0.00129615	0.52956	2	10	94	16762	35.6638
lavenderblush3	GO:0016868	MF	intramolecular transferase activity, phosphotransferases	0.00131056	0.52956	2	10	94	16762	35.6638
lavenderblush3	GO:0008379	MF	thioredoxin peroxidase activity	0.0324747	1	1	6	94	16762	29.7199
lavenderblush3	GO:0004128	MF	cytochrome-b5 reductase activity, acting on NAD(P)H	0.0326624	1	1	6	94	16762	29.7199
lavenderblush3	GO:0004726	MF	non-membrane spanning protein tyrosine phosphatase activity	0.0324693	1	1	6	94	16762	29.7199
lavenderblush3	GO:0004908	MF	interleukin-1 receptor activity	0.0319935	1	1	6	94	16762	29.7199
lavenderblush3	GO:0046912	MF	transferase activity, transferring acyl groups, acyl groups converted into alkyl on transfer	0.0322756	1	1	6	94	16762	29.7199
lavenderblush3	GO:0099635	MF	voltage-gated calcium channel activity involved in positive regulation of presynaptic cytosolic calcium levels	0.0324994	1	1	6	94	16762	29.7199
lavenderblush3	GO:0016832	MF	aldehyde-lyase activity	0.0022065	0.669792	2	13	94	16762	27.4337
lavenderblush3	GO:0008443	MF	phosphofructokinase activity	0.0379279	1	1	7	94	16762	25.4742
lavenderblush3	GO:0070569	MF	uridylyltransferase activity	0.0377502	1	1	7	94	16762	25.4742
lavenderblush3	GO:0008430	MF	selenium binding	0.0425626	1	1	8	94	16762	22.2899
lavenderblush3	GO:0051021	MF	GDP-dissociation inhibitor binding	0.0430316	1	1	8	94	16762	22.2899
lavenderblush3	GO:0001163	MF	RNA polymerase I transcription regulatory region sequence-specific DNA binding	0.0439922	1	1	8	94	16762	22.2899
lavenderblush3	GO:0001164	MF	RNA polymerase I core promoter sequence-specific DNA binding	0.0439922	1	1	8	94	16762	22.2899
lavenderblush3	GO:0001758	MF	retinal dehydrogenase activity	0.0426558	1	1	8	94	16762	22.2899
lavenderblush3	GO:0003958	MF	NADPH-hemoprotein reductase activity	0.0427802	1	1	8	94	16762	22.2899
lavenderblush3	GO:0030898	MF	actin-dependent ATPase activity	0.0438945	1	1	8	94	16762	22.2899
lavenderblush3	GO:0042609	MF	CD4 receptor binding	0.0437159	1	1	8	94	16762	22.2899
lavenderblush3	GO:0140327	MF	flippase activity	0.0446118	1	1	8	94	16762	22.2899
lavenderblush3	GO:1990446	MF	U1 snRNP binding	0.0432651	1	1	8	94	16762	22.2899
lavenderblush3	GO:0016208	MF	AMP binding	0.00382916	0.799707	2	17	94	16762	20.9787
lavenderblush3	GO:0003993	MF	acid phosphatase activity	0.0492358	1	1	9	94	16762	19.8132
lavenderblush3	GO:0004865	MF	protein serine/threonine phosphatase inhibitor activity	0.0477258	1	1	9	94	16762	19.8132
lavenderblush3	GO:0019531	MF	oxalate transmembrane transporter activity	0.0478598	1	1	9	94	16762	19.8132
lavenderblush3	GO:0042301	MF	phosphate ion binding	0.0479547	1	1	9	94	16762	19.8132
lavenderblush3	GO:0052650	MF	NADP-retinol dehydrogenase activity	0.0481099	1	1	9	94	16762	19.8132
lavenderblush3	GO:0140303	MF	intramembrane lipid transporter activity	0.00584075	0.799707	2	21	94	16762	16.9828
lavenderblush3	GO:0016866	MF	intramolecular transferase activity	0.00909678	0.943936	2	26	94	16762	13.7169
lavenderblush3	GO:0048029	MF	monosaccharide binding	4.37196e-05	0.120327	5	71	94	16762	12.5577
lavenderblush3	GO:0016830	MF	carbon-carbon lyase activity	0.00228152	0.669792	3	48	94	16762	11.1449
lavenderblush3	GO:0004601	MF	peroxidase activity	0.0168048	1	2	36	94	16762	9.90662
lavenderblush3	GO:0016651	MF	oxidoreductase activity, acting on NAD(P)H	0.000794913	0.43756	4	76	94	16762	9.38522
lavenderblush3	GO:0016684	MF	oxidoreductase activity, acting on peroxide as acceptor	0.0204413	1	2	40	94	16762	8.91596
lavenderblush3	GO:0015932	MF	nucleobase-containing compound transmembrane transporter activity	0.0209753	1	2	41	94	16762	8.6985
lavenderblush3	GO:0016209	MF	antioxidant activity	0.00574097	0.799707	3	66	94	16762	8.10542
lavenderblush3	GO:0005548	MF	phospholipid transporter activity	0.0284966	1	2	48	94	16762	7.42996
lavenderblush3	GO:0005254	MF	chloride channel activity	0.0309156	1	2	50	94	16762	7.13277
lavenderblush3	GO:0004896	MF	cytokine receptor activity	0.012631	1	3	88	94	16762	6.07906
lavenderblush3	GO:0005253	MF	anion channel activity	0.0430325	1	2	60	94	16762	5.94397
lavenderblush3	GO:0017124	MF	SH3 domain binding	0.00500635	0.799707	4	126	94	16762	5.66093
lavenderblush3	GO:0140375	MF	immune receptor activity	0.0186459	1	3	102	94	16762	5.24468
lavenderblush3	GO:0016829	MF	lyase activity	0.0026191	0.691153	5	173	94	16762	5.15373
lavenderblush3	GO:0030246	MF	carbohydrate binding	0.00157636	0.550198	6	227	94	16762	4.71328
lavenderblush3	GO:0016491	MF	oxidoreductase activity	0.0262968	1	8	651	94	16762	2.19133
lavenderblush3	GO:0016740	MF	transferase activity	0.032654	1	18	2082	94	16762	1.54166
lavenderblush3	GO:0036094	MF	small molecule binding	0.0288617	1	19	2199	94	16762	1.54073
lavenderblush3	GO:0003824	MF	catalytic activity	0.00251468	0.691153	41	5069	94	16762	1.44231
lightcoral	GO:0004768	MF	stearoyl-CoA 9-desaturase activity	0.0146537	1	1	6	45	16762	62.0815
lightcoral	GO:0004859	MF	phospholipase inhibitor activity	0.0181058	1	1	6	45	16762	62.0815
lightcoral	GO:0047631	MF	ADP-ribose diphosphatase activity	0.01503	1	1	6	45	16762	62.0815
lightcoral	GO:0016215	MF	acyl-CoA desaturase activity	0.0170131	1	1	7	45	16762	53.2127
lightcoral	GO:0008568	MF	microtubule-severing ATPase activity	0.0201158	1	1	8	45	16762	46.5611
lightcoral	GO:0016717	MF	oxidoreductase activity, acting on paired donors, with oxidation of a pair of donors resulting in the reduction of molecular oxygen to two molecules of water	0.0191151	1	1	8	45	16762	46.5611
lightcoral	GO:0005225	MF	volume-sensitive anion channel activity	0.0237106	1	1	9	45	16762	41.3877
lightcoral	GO:0005391	MF	sodium:potassium-exchanging ATPase activity	0.0244497	1	1	9	45	16762	41.3877
lightcoral	GO:0008554	MF	sodium transmembrane transporter activity, phosphorylative mechanism	0.0244497	1	1	9	45	16762	41.3877
lightcoral	GO:0008556	MF	potassium transmembrane transporter activity, phosphorylative mechanism	0.0244497	1	1	9	45	16762	41.3877
lightcoral	GO:0055102	MF	lipase inhibitor activity	0.0255518	1	1	9	45	16762	41.3877
lightcoral	GO:0070513	MF	death domain binding	0.0213154	1	1	9	45	16762	41.3877
lightcoral	GO:0030955	MF	potassium ion binding	0.0257243	1	1	10	45	16762	37.2489
lightcoral	GO:0005522	MF	profilin binding	0.0301818	1	1	12	45	16762	31.0407
lightcoral	GO:0000340	MF	RNA 7-methylguanosine cap binding	0.0295205	1	1	12	45	16762	31.0407
lightcoral	GO:0004115	MF	3',5'-cyclic-AMP phosphodiesterase activity	0.0319095	1	1	12	45	16762	31.0407
lightcoral	GO:0031402	MF	sodium ion binding	0.0312974	1	1	12	45	16762	31.0407
lightcoral	GO:0051011	MF	microtubule minus-end binding	0.0273557	1	1	12	45	16762	31.0407
lightcoral	GO:0008301	MF	DNA binding, bending	0.0393767	1	1	14	45	16762	26.6063
lightcoral	GO:0052742	MF	phosphatidylinositol kinase activity	0.0335949	1	1	14	45	16762	26.6063
lightcoral	GO:0000339	MF	RNA cap binding	0.036347	1	1	15	45	16762	24.8326
lightcoral	GO:0031005	MF	filamin binding	0.0358907	1	1	15	45	16762	24.8326
lightcoral	GO:0051400	MF	BH domain binding	0.0365079	1	1	15	45	16762	24.8326
lightcoral	GO:0030506	MF	ankyrin binding	0.0440035	1	1	17	45	16762	21.9111
lightcoral	GO:0031420	MF	alkali metal ion binding	0.0485342	1	1	19	45	16762	19.6047
lightcoral	GO:0047555	MF	3',5'-cyclic-GMP phosphodiesterase activity	0.0452985	1	1	19	45	16762	19.6047
lightcoral	GO:0009055	MF	electron transfer activity	0.0118771	1	2	66	45	16762	11.2875
lightcoral	GO:0008081	MF	phosphoric diester hydrolase activity	0.019719	1	2	84	45	16762	8.86878
lightcoral	GO:0051087	MF	chaperone binding	0.0246346	1	2	95	45	16762	7.84187
lightcoral	GO:0008017	MF	microtubule binding	0.00276154	1	4	229	45	16762	6.50636
lightcoral	GO:0015631	MF	tubulin binding	0.00127255	1	5	318	45	16762	5.85674
lightcoral	GO:0016705	MF	oxidoreductase activity, acting on paired donors, with incorporation or reduction of molecular oxygen	0.0470935	1	2	135	45	16762	5.51835
lightcoral	GO:0042578	MF	phosphoric ester hydrolase activity	0.0104169	1	4	331	45	16762	4.50138
lightcoral	GO:0008092	MF	cytoskeletal protein binding	0.0003969	1	9	903	45	16762	3.71251
lightcoral	GO:0005515	MF	protein binding	0.00581104	1	29	7916	45	16762	1.3646
lightcoral	GO:0005488	MF	binding	0.0240053	1	35	11141	45	16762	1.17019
lightcyan	GO:0089720	MF	caspase binding	0.00740316	0.931444	2	6	385	16762	14.5126
lightcyan	GO:0003747	MF	translation release factor activity	0.00943215	1	2	7	385	16762	12.4393
lightcyan	GO:0005138	MF	interleukin-6 receptor binding	0.00997417	1	2	7	385	16762	12.4393
lightcyan	GO:0008079	MF	translation termination factor activity	0.00943215	1	2	7	385	16762	12.4393
lightcyan	GO:0008469	MF	histone-arginine N-methyltransferase activity	0.00931823	1	2	7	385	16762	12.4393
lightcyan	GO:0016723	MF	oxidoreductase activity, oxidizing metal ions, NAD or NADP as acceptor	0.0121276	1	2	8	385	16762	10.8844
lightcyan	GO:0031748	MF	D1 dopamine receptor binding	0.00212725	0.418194	3	12	385	16762	10.8844
lightcyan	GO:0016273	MF	arginine N-methyltransferase activity	0.0159136	1	2	9	385	16762	9.67504
lightcyan	GO:0016274	MF	protein-arginine N-methyltransferase activity	0.0159136	1	2	9	385	16762	9.67504
lightcyan	GO:0033204	MF	ribonuclease P RNA binding	0.0202311	1	2	10	385	16762	8.70753
lightcyan	GO:0016722	MF	oxidoreductase activity, oxidizing metal ions	0.00488188	0.693479	3	16	385	16762	8.16331
lightcyan	GO:0001094	MF	TFIID-class transcription factor complex binding	0.0256118	1	2	11	385	16762	7.91594
lightcyan	GO:0004438	MF	phosphatidylinositol-3-phosphatase activity	0.0249477	1	2	11	385	16762	7.91594
lightcyan	GO:0004526	MF	ribonuclease P activity	0.0241441	1	2	11	385	16762	7.91594
lightcyan	GO:0019211	MF	phosphatase activator activity	0.023914	1	2	11	385	16762	7.91594
lightcyan	GO:0034450	MF	ubiquitin-ubiquitin ligase activity	0.024247	1	2	11	385	16762	7.91594
lightcyan	GO:0000030	MF	mannosyltransferase activity	0.00226508	0.437479	4	25	385	16762	6.96603
lightcyan	GO:0052744	MF	phosphatidylinositol monophosphate phosphatase activity	0.0337067	1	2	13	385	16762	6.6981
lightcyan	GO:0004298	MF	threonine-type endopeptidase activity	0.00979377	1	3	20	385	16762	6.53065
lightcyan	GO:0070003	MF	threonine-type peptidase activity	0.00979377	1	3	20	385	16762	6.53065
lightcyan	GO:0016875	MF	ligase activity, forming carbon-oxygen bonds	0.000307263	0.0914233	6	41	385	16762	6.37137
lightcyan	GO:0004812	MF	aminoacyl-tRNA ligase activity	0.000307263	0.0914233	6	41	385	16762	6.37137
lightcyan	GO:0050780	MF	dopamine receptor binding	0.0123483	1	3	22	385	16762	5.93695
lightcyan	GO:0005123	MF	death receptor binding	0.0450669	1	2	15	385	16762	5.80502
lightcyan	GO:0016628	MF	oxidoreductase activity, acting on the CH-CH group of donors, NAD or NADP as acceptor	0.0143879	1	3	23	385	16762	5.67883
lightcyan	GO:0004549	MF	tRNA-specific ribonuclease activity	0.0479648	1	2	16	385	16762	5.44221
lightcyan	GO:0051059	MF	NF-kappaB binding	0.00545376	0.750505	4	32	385	16762	5.44221
lightcyan	GO:0070888	MF	E-box binding	0.0106876	1	4	39	385	16762	4.4654
lightcyan	GO:0005164	MF	tumor necrosis factor receptor binding	0.0291102	1	3	30	385	16762	4.35377
lightcyan	GO:0004722	MF	protein serine/threonine phosphatase activity	0.0031084	0.510753	6	65	385	16762	4.01886
lightcyan	GO:0009055	MF	electron transfer activity	0.00376218	0.58335	6	66	385	16762	3.95797
lightcyan	GO:0140101	MF	catalytic activity, acting on a tRNA	0.000231013	0.0716399	10	113	385	16762	3.85289
lightcyan	GO:0000049	MF	tRNA binding	0.009725	1	5	58	385	16762	3.75325
lightcyan	GO:0008009	MF	chemokine activity	0.0490687	1	3	37	385	16762	3.53008
lightcyan	GO:0019208	MF	phosphatase regulator activity	0.00800167	0.981217	6	78	385	16762	3.34905
lightcyan	GO:0019888	MF	protein phosphatase regulator activity	0.0160869	1	5	66	385	16762	3.29831
lightcyan	GO:0016627	MF	oxidoreductase activity, acting on the CH-CH group of donors	0.0337286	1	4	54	385	16762	3.22501
lightcyan	GO:0004521	MF	endoribonuclease activity	0.0341202	1	4	55	385	16762	3.16638
lightcyan	GO:0019843	MF	rRNA binding	0.0214488	1	5	70	385	16762	3.10983
lightcyan	GO:0051082	MF	unfolded protein binding	0.0171402	1	6	92	385	16762	2.83941
lightcyan	GO:0004721	MF	phosphoprotein phosphatase activity	0.00332125	0.533775	10	161	385	16762	2.7042
lightcyan	GO:0003735	MF	structural constituent of ribosome	0.00596454	0.810662	9	146	385	16762	2.68383
lightcyan	GO:0016874	MF	ligase activity	0.0341245	1	7	135	385	16762	2.25751
lightcyan	GO:0016791	MF	phosphatase activity	0.021562	1	11	244	385	16762	1.96276
lightcyan	GO:0140098	MF	catalytic activity, acting on RNA	0.0443679	1	13	340	385	16762	1.66468
lightcyan	GO:0032550	MF	purine ribonucleoside binding	0.0442186	1	13	340	385	16762	1.66468
lightcyan	GO:0001883	MF	purine nucleoside binding	0.0467873	1	13	343	385	16762	1.65012
lightcyan	GO:0032549	MF	ribonucleoside binding	0.0467782	1	13	343	385	16762	1.65012
lightcyan	GO:0016491	MF	oxidoreductase activity	0.0128782	1	24	651	385	16762	1.60508
lightcyan	GO:0003723	MF	RNA binding	0.00390523	0.59712	36	1002	385	16762	1.56423
lightcyan	GO:0003824	MF	catalytic activity	0.0191354	1	133	5069	385	16762	1.14234
lightcyan1	GO:0003756	MF	protein disulfide isomerase activity	5.38446e-06	0.0183662	4	14	152	16762	31.5075
lightcyan1	GO:0016864	MF	intramolecular oxidoreductase activity, transposing S-S bonds	5.38446e-06	0.0183662	4	14	152	16762	31.5075
lightcyan1	GO:0016670	MF	oxidoreductase activity, acting on a sulfur group of donors, oxygen as acceptor	0.00233149	0.523946	2	9	152	16762	24.5058
lightcyan1	GO:0046933	MF	proton-transporting ATP synthase activity, rotational mechanism	0.000212616	0.111462	3	14	152	16762	23.6306
lightcyan1	GO:0015252	MF	proton channel activity	0.000329675	0.140799	3	16	152	16762	20.6768
lightcyan1	GO:0004711	MF	ribosomal protein S6 kinase activity	0.0474876	1	1	6	152	16762	18.3794
lightcyan1	GO:0019784	MF	NEDD8-specific protease activity	0.0498066	1	1	6	152	16762	18.3794
lightcyan1	GO:0015037	MF	peptide disulfide oxidoreductase activity	0.00689555	1	2	14	152	16762	15.7538
lightcyan1	GO:0016814	MF	hydrolase activity, acting on carbon-nitrogen (but not peptide) bonds, in cyclic amidines	0.00150638	0.386979	3	26	152	16762	12.7242
lightcyan1	GO:0016667	MF	oxidoreductase activity, acting on a sulfur group of donors	8.77258e-05	0.0704171	5	51	152	16762	10.8114
lightcyan1	GO:0016860	MF	intramolecular oxidoreductase activity	0.000472245	0.167708	4	42	152	16762	10.5025
lightcyan1	GO:0016879	MF	ligase activity, forming carbon-nitrogen bonds	0.00527096	0.928448	3	41	152	16762	8.069
lightcyan1	GO:0016776	MF	phosphotransferase activity, phosphate group as acceptor	0.00757486	1	3	45	152	16762	7.35175
lightcyan1	GO:0015370	MF	solute:sodium symporter activity	0.00970426	1	3	50	152	16762	6.61658
lightcyan1	GO:0043394	MF	proteoglycan binding	0.039419	1	2	34	152	16762	6.48684
lightcyan1	GO:0043028	MF	cysteine-type endopeptidase regulator activity involved in apoptotic process	0.0438185	1	2	36	152	16762	6.12646
lightcyan1	GO:0015036	MF	disulfide oxidoreductase activity	0.042263	1	2	36	152	16762	6.12646
lightcyan1	GO:0015294	MF	solute:cation symporter activity	0.00507704	0.908831	4	76	152	16762	5.80402
lightcyan1	GO:0090079	MF	translation regulator activity, nucleic acid binding	0.00960574	1	4	94	152	16762	4.69261
lightcyan1	GO:0008135	MF	translation factor activity, RNA binding	0.0295658	1	3	76	152	16762	4.35301
lightcyan1	GO:0015078	MF	proton transmembrane transporter activity	0.0132424	1	4	103	152	16762	4.28258
lightcyan1	GO:0000287	MF	magnesium ion binding	0.00121679	0.326724	7	184	152	16762	4.19529
lightcyan1	GO:0008514	MF	organic anion transmembrane transporter activity	0.00480942	0.889864	6	172	152	16762	3.84685
lightcyan1	GO:0004222	MF	metalloendopeptidase activity	0.0397543	1	3	87	152	16762	3.80263
lightcyan1	GO:0015293	MF	symporter activity	0.0221016	1	4	117	152	16762	3.77013
lightcyan1	GO:0005342	MF	organic acid transmembrane transporter activity	0.0241453	1	4	121	152	16762	3.6455
lightcyan1	GO:0046943	MF	carboxylic acid transmembrane transporter activity	0.0241453	1	4	121	152	16762	3.6455
lightcyan1	GO:0022853	MF	active ion transmembrane transporter activity	0.00599982	1	6	182	152	16762	3.63548
lightcyan1	GO:0045182	MF	translation regulator activity	0.0246253	1	4	125	152	16762	3.52884
lightcyan1	GO:0015291	MF	secondary active transmembrane transporter activity	0.00789309	1	6	193	152	16762	3.42828
lightcyan1	GO:0016874	MF	ligase activity	0.030888	1	4	135	152	16762	3.26745
lightcyan1	GO:0016853	MF	isomerase activity	0.0374669	1	4	143	152	16762	3.08465
lightcyan1	GO:0022804	MF	active transmembrane transporter activity	0.00455581	0.854165	8	290	152	16762	3.04211
lightcyan1	GO:0003735	MF	structural constituent of ribosome	0.0393197	1	4	146	152	16762	3.02127
lightcyan1	GO:0005198	MF	structural molecule activity	0.000450037	0.162441	13	495	152	16762	2.89615
lightcyan1	GO:0003924	MF	GTPase activity	0.0110439	1	7	275	152	16762	2.80703
lightcyan1	GO:0015077	MF	monovalent inorganic cation transmembrane transporter activity	0.0172747	1	7	297	152	16762	2.59911
lightcyan1	GO:0032549	MF	ribonucleoside binding	0.0115034	1	8	343	152	16762	2.57204
lightcyan1	GO:0008509	MF	anion transmembrane transporter activity	0.029583	1	6	259	152	16762	2.55466
lightcyan1	GO:0001882	MF	nucleoside binding	0.0129927	1	8	351	152	16762	2.51342
lightcyan1	GO:0005525	MF	GTP binding	0.0289111	1	7	333	152	16762	2.31812
lightcyan1	GO:0022890	MF	inorganic cation transmembrane transporter activity	0.0108303	1	10	476	152	16762	2.31673
lightcyan1	GO:0032550	MF	purine ribonucleoside binding	0.0320301	1	7	340	152	16762	2.27039
lightcyan1	GO:0001883	MF	purine nucleoside binding	0.0333404	1	7	343	152	16762	2.25054
lightcyan1	GO:0019001	MF	guanyl nucleotide binding	0.0372809	1	7	352	152	16762	2.19299
lightcyan1	GO:0032561	MF	guanyl ribonucleotide binding	0.0372809	1	7	352	152	16762	2.19299
lightcyan1	GO:0008324	MF	cation transmembrane transporter activity	0.0181767	1	10	516	152	16762	2.13714
lightcyan1	GO:0015075	MF	ion transmembrane transporter activity	0.0223723	1	12	695	152	16762	1.90405
lightcyan1	GO:0015318	MF	inorganic molecular entity transmembrane transporter activity	0.0317075	1	11	651	152	16762	1.86335
lightcyan1	GO:0016817	MF	hydrolase activity, acting on acid anhydrides	0.0408874	1	12	768	152	16762	1.72307
lightcyan1	GO:0016818	MF	hydrolase activity, acting on acid anhydrides, in phosphorus-containing anhydrides	0.0408874	1	12	768	152	16762	1.72307
lightcyan1	GO:0016787	MF	hydrolase activity	0.00233203	0.523946	32	2176	152	16762	1.62171
lightcyan1	GO:0003824	MF	catalytic activity	0.018737	1	57	5069	152	16762	1.24004
lightgreen	GO:0098882	MF	structural constituent of presynaptic active zone	0.00799436	0.343789	2	7	354	16762	13.5287
lightgreen	GO:0030628	MF	pre-mRNA 3'-splice site binding	0.00768472	0.337729	2	7	354	16762	13.5287
lightgreen	GO:0017017	MF	MAP kinase tyrosine/serine/threonine phosphatase activity	0.00154186	0.118808	3	12	354	16762	11.8376
lightgreen	GO:0034046	MF	poly(G) binding	0.0126622	0.470938	2	9	354	16762	10.5223
lightgreen	GO:0033549	MF	MAP kinase phosphatase activity	0.00247981	0.162987	3	14	354	16762	10.1465
lightgreen	GO:0035259	MF	glucocorticoid receptor binding	0.000735224	0.0782037	4	21	354	16762	9.0191
lightgreen	GO:0048407	MF	platelet-derived growth factor binding	0.0234814	0.611128	2	12	354	16762	7.89171
lightgreen	GO:0008266	MF	poly(U) RNA binding	0.0016438	0.122689	4	26	354	16762	7.28466
lightgreen	GO:0005104	MF	fibroblast growth factor receptor binding	0.00700884	0.318187	3	20	354	16762	7.10254
lightgreen	GO:0005161	MF	platelet-derived growth factor receptor binding	0.0309834	0.738303	2	14	354	16762	6.76433
lightgreen	GO:0016881	MF	acid-amino acid ligase activity	0.0317587	0.742087	2	14	354	16762	6.76433
lightgreen	GO:0001223	MF	transcription coactivator binding	0.00924404	0.385484	3	22	354	16762	6.45686
lightgreen	GO:0008009	MF	chemokine activity	0.000773271	0.0810756	5	37	354	16762	6.39869
lightgreen	GO:0008187	MF	poly-pyrimidine tract binding	0.00283516	0.178867	4	30	354	16762	6.31337
lightgreen	GO:0008143	MF	poly(A) binding	0.0105123	0.421308	3	23	354	16762	6.17612
lightgreen	GO:0070717	MF	poly-purine tract binding	0.00317191	0.195628	4	31	354	16762	6.10971
lightgreen	GO:0042379	MF	chemokine receptor binding	0.00040417	0.052252	6	49	354	16762	5.79799
lightgreen	GO:0004622	MF	lysophospholipase activity	0.0445085	0.807905	2	17	354	16762	5.57062
lightgreen	GO:0008138	MF	protein tyrosine/serine/threonine phosphatase activity	0.00561582	0.281021	4	36	354	16762	5.26114
lightgreen	GO:0019956	MF	chemokine binding	0.0214564	0.577761	3	30	354	16762	4.73503
lightgreen	GO:0001221	MF	transcription cofactor binding	0.00309952	0.193329	5	50	354	16762	4.73503
lightgreen	GO:0004532	MF	exoribonuclease activity	0.023651	0.613367	3	31	354	16762	4.58229
lightgreen	GO:0035035	MF	histone acetyltransferase binding	0.023796	0.616401	3	31	354	16762	4.58229
lightgreen	GO:0098531	MF	ligand-activated transcription factor activity	0.0281834	0.690071	3	33	354	16762	4.30457
lightgreen	GO:0004879	MF	nuclear receptor activity	0.0281834	0.690071	3	33	354	16762	4.30457
lightgreen	GO:0001046	MF	core promoter sequence-specific DNA binding	0.0141589	0.502824	4	47	354	16762	4.02981
lightgreen	GO:0000979	MF	RNA polymerase II core promoter sequence-specific DNA binding	0.0349958	0.759735	3	36	354	16762	3.94586
lightgreen	GO:0032451	MF	demethylase activity	0.0379892	0.759735	3	37	354	16762	3.83921
lightgreen	GO:0004402	MF	histone acetyltransferase activity	0.00850837	0.360264	5	63	354	16762	3.75796
lightgreen	GO:0008146	MF	sulfotransferase activity	0.0393397	0.759735	3	38	354	16762	3.73818
lightgreen	GO:0061733	MF	peptide-lysine-N-acetyltransferase activity	0.00965741	0.401202	5	65	354	16762	3.64233
lightgreen	GO:0035258	MF	steroid hormone receptor binding	0.00530833	0.271811	6	80	354	16762	3.55127
lightgreen	GO:0016922	MF	nuclear receptor binding	0.00139566	0.113439	8	107	354	16762	3.54021
lightgreen	GO:0016782	MF	transferase activity, transferring sulfur-containing groups	0.0227376	0.602452	4	54	354	16762	3.50743
lightgreen	GO:0005125	MF	cytokine activity	0.000290026	0.0417616	11	155	354	16762	3.36034
lightgreen	GO:0034212	MF	peptide N-acetyltransferase activity	0.015449	0.535033	5	73	354	16762	3.24317
lightgreen	GO:0003727	MF	single-stranded RNA binding	0.00837798	0.355427	6	88	354	16762	3.22843
lightgreen	GO:0001228	MF	DNA-binding transcription activator activity, RNA polymerase II-specific	2.601e-07	0.000168437	24	359	354	16762	3.16548
lightgreen	GO:0001216	MF	DNA-binding transcription activator activity	2.73956e-07	0.00017107	24	360	354	16762	3.15669
lightgreen	GO:0035257	MF	nuclear hormone receptor binding	0.00207124	0.144844	9	140	354	16762	3.04395
lightgreen	GO:0030374	MF	nuclear receptor transcription coactivator activity	0.0376234	0.759735	4	63	354	16762	3.00637
lightgreen	GO:0019888	MF	protein phosphatase regulator activity	0.0435368	0.798398	4	66	354	16762	2.86971
lightgreen	GO:0001085	MF	RNA polymerase II transcription factor binding	0.0444361	0.807905	4	67	354	16762	2.82688
lightgreen	GO:0000987	MF	cis-regulatory region sequence-specific DNA binding	2.06533e-07	0.000151582	29	491	354	16762	2.79666
lightgreen	GO:0004867	MF	serine-type endopeptidase inhibitor activity	0.0467493	0.830771	4	68	354	16762	2.78531
lightgreen	GO:0003730	MF	mRNA 3'-UTR binding	0.0294984	0.713732	5	86	354	16762	2.75292
lightgreen	GO:0008080	MF	N-acetyltransferase activity	0.03187	0.74304	5	88	354	16762	2.69036
lightgreen	GO:0000978	MF	RNA polymerase II cis-regulatory region sequence-specific DNA binding	1.25895e-06	0.000554391	27	477	354	16762	2.6802
lightgreen	GO:0004725	MF	protein tyrosine phosphatase activity	0.0346156	0.759735	5	90	354	16762	2.63057
lightgreen	GO:0051427	MF	hormone receptor binding	0.00549304	0.278677	9	162	354	16762	2.63057
lightgreen	GO:0048018	MF	receptor ligand activity	8.29699e-05	0.0173578	19	349	354	16762	2.57781
lightgreen	GO:0030546	MF	signaling receptor activator activity	0.000103911	0.0200694	19	355	354	16762	2.53424
lightgreen	GO:1990837	MF	sequence-specific double-stranded DNA binding	1.24915e-08	3.43797e-05	40	754	354	16762	2.51195
lightgreen	GO:0005126	MF	cytokine receptor binding	0.00141161	0.113439	13	246	354	16762	2.50225
lightgreen	GO:0030545	MF	receptor regulator activity	8.35644e-05	0.0173578	20	379	354	16762	2.4987
lightgreen	GO:0000976	MF	transcription regulatory region sequence-specific DNA binding	1.07382e-07	8.44408e-05	37	712	354	16762	2.46062
lightgreen	GO:0001067	MF	regulatory region nucleic acid binding	1.23556e-07	9.38089e-05	37	716	354	16762	2.44687
lightgreen	GO:0000977	MF	RNA polymerase II transcription regulatory region sequence-specific DNA binding	6.22717e-07	0.000311613	34	669	354	16762	2.40644
lightgreen	GO:0140297	MF	DNA-binding transcription factor binding	0.000557924	0.0643601	17	342	354	16762	2.35367
lightgreen	GO:0003700	MF	DNA-binding transcription factor activity	8.38674e-08	7.37302e-05	41	833	354	16762	2.33057
lightgreen	GO:0000981	MF	DNA-binding transcription factor activity, RNA polymerase II-specific	4.14975e-06	0.00149786	31	633	354	16762	2.31889
lightgreen	GO:0043565	MF	sequence-specific DNA binding	2.85662e-08	4.84748e-05	45	938	354	16762	2.2716
lightgreen	GO:0003690	MF	double-stranded DNA binding	2.91079e-07	0.000173216	40	837	354	16762	2.26286
lightgreen	GO:0070851	MF	growth factor receptor binding	0.046947	0.831601	6	130	354	16762	2.1854
lightgreen	GO:0008134	MF	transcription factor binding	3.08074e-05	0.00753686	30	666	354	16762	2.1329
lightgreen	GO:0061629	MF	RNA polymerase II-specific DNA-binding transcription factor binding	0.00776579	0.339935	12	267	354	16762	2.1281
lightgreen	GO:0001217	MF	DNA-binding transcription repressor activity	0.0294607	0.713732	9	215	354	16762	1.9821
lightgreen	GO:0001227	MF	DNA-binding transcription repressor activity, RNA polymerase II-specific	0.0294607	0.713732	9	215	354	16762	1.9821
lightgreen	GO:0140110	MF	transcription regulator activity	5.73632e-07	0.000293726	49	1171	354	16762	1.98135
lightgreen	GO:0005102	MF	signaling receptor binding	4.7254e-05	0.0108248	49	1367	354	16762	1.69727
lightgreen	GO:0003682	MF	chromatin binding	0.0121087	0.458038	19	536	354	16762	1.67846
lightgreen	GO:0003677	MF	DNA binding	1.03761e-05	0.00317305	61	1747	354	16762	1.65333
lightgreen	GO:0098772	MF	molecular function regulator	0.00686124	0.316048	43	1460	354	16762	1.39456
lightgreen	GO:0003676	MF	nucleic acid binding	0.000331657	0.0453566	79	2727	354	16762	1.37172
lightgreen	GO:1901363	MF	heterocyclic compound binding	0.0175162	0.566679	107	4460	354	16762	1.13598
lightgreen	GO:0097159	MF	organic cyclic compound binding	0.0264966	0.666945	107	4528	354	16762	1.11892
lightgreen	GO:0005515	MF	protein binding	0.0320123	0.744989	176	7916	354	16762	1.05276
lightgreen	GO:0005488	MF	binding	0.0213592	0.577039	241	11141	354	16762	1.02427
lightpink4	GO:0042809	MF	vitamin D receptor binding	0.000885969	1	2	8	98	16762	42.7602
lightpink4	GO:0004128	MF	cytochrome-b5 reductase activity, acting on NAD(P)H	0.0324278	1	1	6	98	16762	28.5068
lightpink4	GO:0004936	MF	alpha-adrenergic receptor activity	0.033283	1	1	6	98	16762	28.5068
lightpink4	GO:0005021	MF	vascular endothelial growth factor-activated receptor activity	0.0355977	1	1	6	98	16762	28.5068
lightpink4	GO:0017169	MF	CDP-alcohol phosphatidyltransferase activity	0.0318525	1	1	6	98	16762	28.5068
lightpink4	GO:0042500	MF	aspartic endopeptidase activity, intramembrane cleaving	0.032259	1	1	6	98	16762	28.5068
lightpink4	GO:0038036	MF	sphingosine-1-phosphate receptor activity	0.0373358	1	1	7	98	16762	24.4344
lightpink4	GO:0038085	MF	vascular endothelial growth factor binding	0.041396	1	1	7	98	16762	24.4344
lightpink4	GO:0046975	MF	histone methyltransferase activity (H3-K36 specific)	0.0382624	1	1	7	98	16762	24.4344
lightpink4	GO:0046976	MF	histone methyltransferase activity (H3-K27 specific)	0.04018	1	1	7	98	16762	24.4344
lightpink4	GO:0070569	MF	uridylyltransferase activity	0.0383878	1	1	7	98	16762	24.4344
lightpink4	GO:0005229	MF	intracellular calcium activated chloride channel activity	0.0429585	1	1	8	98	16762	21.3801
lightpink4	GO:0042609	MF	CD4 receptor binding	0.0433201	1	1	8	98	16762	21.3801
lightpink4	GO:0061778	MF	intracellular chloride channel activity	0.0429585	1	1	8	98	16762	21.3801
lightpink4	GO:0005225	MF	volume-sensitive anion channel activity	0.0494657	1	1	9	98	16762	19.0045
lightpink4	GO:0009931	MF	calcium-dependent protein serine/threonine kinase activity	0.0487389	1	1	9	98	16762	19.0045
lightpink4	GO:0052650	MF	NADP-retinol dehydrogenase activity	0.0497958	1	1	9	98	16762	19.0045
lightpink4	GO:0030332	MF	cyclin binding	0.0139241	1	2	32	98	16762	10.6901
lightpink4	GO:0005504	MF	fatty acid binding	0.0173807	1	2	36	98	16762	9.50227
lightpink4	GO:0051721	MF	protein phosphatase 2A binding	0.0177063	1	2	36	98	16762	9.50227
lightpink4	GO:0061980	MF	regulatory RNA binding	0.0179035	1	2	37	98	16762	9.24545
lightpink4	GO:0047485	MF	protein N-terminus binding	7.67628e-05	1	6	127	98	16762	8.08067
lightpink4	GO:0005254	MF	chloride channel activity	0.031495	1	2	50	98	16762	6.84163
lightpink4	GO:0033293	MF	monocarboxylic acid binding	0.0412894	1	2	58	98	16762	5.89796
lightpink4	GO:0005253	MF	anion channel activity	0.0442083	1	2	60	98	16762	5.70136
lightpink4	GO:0016407	MF	acetyltransferase activity	0.0230607	1	3	109	98	16762	4.70755
lightpink4	GO:0003713	MF	transcription coactivator activity	0.011997	1	5	244	98	16762	3.50493
lightpink4	GO:0019902	MF	phosphatase binding	0.0275105	1	4	205	98	16762	3.33738
lightpink4	GO:0016747	MF	transferase activity, transferring acyl groups other than amino-acyl groups	0.0308357	1	4	211	98	16762	3.24248
lightpink4	GO:0016746	MF	transferase activity, transferring acyl groups	0.0465609	1	4	241	98	16762	2.83885
lightpink4	GO:0048037	MF	cofactor binding	0.0138416	1	7	452	98	16762	2.64886
lightpink4	GO:0003712	MF	transcription coregulator activity	0.0336098	1	6	430	98	16762	2.38662
lightpink4	GO:0140110	MF	transcription regulator activity	0.00539602	1	14	1171	98	16762	2.04489
lightsteelblue	GO:0016160	MF	amylase activity	6.1671e-10	6.78936e-06	4	6	47	16762	237.759
lightsteelblue	GO:0003997	MF	acyl-CoA oxidase activity	0.0156499	1	1	6	47	16762	59.4397
lightsteelblue	GO:0004563	MF	beta-N-acetylhexosaminidase activity	0.0156482	1	1	6	47	16762	59.4397
lightsteelblue	GO:0004568	MF	chitinase activity	0.0156517	1	1	6	47	16762	59.4397
lightsteelblue	GO:0005168	MF	neurotrophin TRKA receptor binding	0.015648	1	1	6	47	16762	59.4397
lightsteelblue	GO:0031493	MF	nucleosomal histone binding	0.0156488	1	1	6	47	16762	59.4397
lightsteelblue	GO:0005035	MF	death receptor activity	0.0182325	1	1	7	47	16762	50.9483
lightsteelblue	GO:0048406	MF	nerve growth factor binding	0.0182325	1	1	7	47	16762	50.9483
lightsteelblue	GO:0005242	MF	inward rectifier potassium channel activity	0.00069192	1	2	15	47	16762	47.5518
lightsteelblue	GO:0008061	MF	chitin binding	0.0208154	1	1	8	47	16762	44.5798
lightsteelblue	GO:0005167	MF	neurotrophin TRK receptor binding	0.0208107	1	1	8	47	16762	44.5798
lightsteelblue	GO:0016884	MF	carbon-nitrogen ligase activity, with glutamine as amido-N-donor	0.0208138	1	1	8	47	16762	44.5798
lightsteelblue	GO:0070492	MF	oligosaccharide binding	0.0233823	1	1	9	47	16762	39.6265
lightsteelblue	GO:0033691	MF	sialic acid binding	0.0233839	1	1	9	47	16762	39.6265
lightsteelblue	GO:0005391	MF	sodium:potassium-exchanging ATPase activity	0.023382	1	1	9	47	16762	39.6265
lightsteelblue	GO:0008554	MF	sodium transmembrane transporter activity, phosphorylative mechanism	0.023382	1	1	9	47	16762	39.6265
lightsteelblue	GO:0008556	MF	potassium transmembrane transporter activity, phosphorylative mechanism	0.023382	1	1	9	47	16762	39.6265
lightsteelblue	GO:0016634	MF	oxidoreductase activity, acting on the CH-CH group of donors, oxygen as acceptor	0.0233839	1	1	9	47	16762	39.6265
lightsteelblue	GO:0004706	MF	JUN kinase kinase kinase activity	0.0259476	1	1	10	47	16762	35.6638
lightsteelblue	GO:0043121	MF	neurotrophin binding	0.0259477	1	1	10	47	16762	35.6638
lightsteelblue	GO:0045295	MF	gamma-catenin binding	0.0285066	1	1	11	47	16762	32.4217
lightsteelblue	GO:0000014	MF	single-stranded DNA endodeoxyribonuclease activity	0.0285066	1	1	11	47	16762	32.4217
lightsteelblue	GO:0022841	MF	potassium ion leak channel activity	0.0285104	1	1	11	47	16762	32.4217
lightsteelblue	GO:0047372	MF	acylglycerol lipase activity	0.02851	1	1	11	47	16762	32.4217
lightsteelblue	GO:0016725	MF	oxidoreductase activity, acting on CH or CH2 groups	0.0310602	1	1	12	47	16762	29.7199
lightsteelblue	GO:0045294	MF	alpha-catenin binding	0.0310571	1	1	12	47	16762	29.7199
lightsteelblue	GO:0051011	MF	microtubule minus-end binding	0.031061	1	1	12	47	16762	29.7199
lightsteelblue	GO:0022840	MF	leak channel activity	0.0336078	1	1	13	47	16762	27.4337
lightsteelblue	GO:0022842	MF	narrow pore channel activity	0.0336078	1	1	13	47	16762	27.4337
lightsteelblue	GO:0005165	MF	neurotrophin receptor binding	0.0361415	1	1	14	47	16762	25.4742
lightsteelblue	GO:0008191	MF	metalloendopeptidase inhibitor activity	0.0361427	1	1	14	47	16762	25.4742
lightsteelblue	GO:0015929	MF	hexosaminidase activity	0.0361423	1	1	14	47	16762	25.4742
lightsteelblue	GO:0048019	MF	receptor antagonist activity	0.0361421	1	1	14	47	16762	25.4742
lightsteelblue	GO:0046875	MF	ephrin receptor binding	0.00298343	1	2	31	47	16762	23.0089
lightsteelblue	GO:0030676	MF	Rac guanyl-nucleotide exchange factor activity	0.0411986	1	1	16	47	16762	22.2899
lightsteelblue	GO:0030506	MF	ankyrin binding	0.0437207	1	1	17	47	16762	20.9787
lightsteelblue	GO:0004553	MF	hydrolase activity, hydrolyzing O-glycosyl compounds	2.93302e-06	0.0215264	5	86	47	16762	20.7348
lightsteelblue	GO:0008553	MF	proton-exporting ATPase activity, phosphorylative mechanism	0.0462322	1	1	18	47	16762	19.8132
lightsteelblue	GO:0008157	MF	protein phosphatase 1 binding	0.0487368	1	1	19	47	16762	18.7704
lightsteelblue	GO:0016798	MF	hydrolase activity, acting on glycosyl bonds	9.83867e-06	0.054157	5	110	47	16762	16.2108
lightsteelblue	GO:0045296	MF	cadherin binding	0.0115244	1	2	62	47	16762	11.5045
lightsteelblue	GO:0005249	MF	voltage-gated potassium channel activity	0.0126146	1	2	65	47	16762	10.9735
lightsteelblue	GO:0004527	MF	exonuclease activity	0.0153217	1	2	72	47	16762	9.90662
lightsteelblue	GO:0099094	MF	ligand-gated cation channel activity	0.0173956	1	2	77	47	16762	9.26333
lightsteelblue	GO:0015079	MF	potassium ion transmembrane transporter activity	0.00468522	1	3	129	47	16762	8.29391
lightsteelblue	GO:0005267	MF	potassium channel activity	0.027298	1	2	98	47	16762	7.27833
lightsteelblue	GO:0015276	MF	ligand-gated ion channel activity	0.0283337	1	2	100	47	16762	7.13277
lightsteelblue	GO:0022834	MF	ligand-gated channel activity	0.0299201	1	2	103	47	16762	6.92502
lightsteelblue	GO:0005516	MF	calmodulin binding	0.00969362	1	3	168	47	16762	6.36854
lightsteelblue	GO:0015081	MF	sodium ion transmembrane transporter activity	0.0354575	1	2	113	47	16762	6.31218
lightsteelblue	GO:0022843	MF	voltage-gated cation channel activity	0.0360325	1	2	114	47	16762	6.25681
lightsteelblue	GO:0031406	MF	carboxylic acid binding	0.0116812	1	3	180	47	16762	5.94397
lightsteelblue	GO:0043177	MF	organic acid binding	0.0123919	1	3	184	47	16762	5.81475
lightsteelblue	GO:0015077	MF	monovalent inorganic cation transmembrane transporter activity	0.0427895	1	3	297	47	16762	3.60241
lightsteelblue	GO:0016787	MF	hydrolase activity	0.0222835	1	11	2176	47	16762	1.80286
lightsteelblue1	GO:0015181	MF	arginine transmembrane transporter activity	0.0489421	1	1	6	156	16762	17.9081
lightsteelblue1	GO:0032183	MF	SUMO binding	0.0113762	1	2	17	156	16762	12.641
lightsteelblue1	GO:0051721	MF	protein phosphatase 2A binding	0.00440506	0.854601	3	36	156	16762	8.95406
lightsteelblue1	GO:0032182	MF	ubiquitin-like protein binding	2.74351e-05	0.205942	7	93	156	16762	8.08754
lightsteelblue1	GO:0043130	MF	ubiquitin binding	0.000590988	0.458145	5	72	156	16762	7.46172
lightsteelblue1	GO:0005154	MF	epidermal growth factor receptor binding	0.0383306	1	2	32	156	16762	6.71554
lightsteelblue1	GO:0031624	MF	ubiquitin conjugating enzyme binding	0.0367675	1	2	33	156	16762	6.51204
lightsteelblue1	GO:0044390	MF	ubiquitin-like protein conjugating enzyme binding	0.0475722	1	2	38	156	16762	5.6552
lightsteelblue1	GO:0030145	MF	manganese ion binding	0.0156326	1	3	57	156	16762	5.6552
lightsteelblue1	GO:0008173	MF	RNA methyltransferase activity	0.0201142	1	3	61	156	16762	5.28436
lightsteelblue1	GO:0004197	MF	cysteine-type endopeptidase activity	0.0382324	1	3	78	156	16762	4.13264
lightsteelblue1	GO:0008168	MF	methyltransferase activity	0.00157178	0.624205	7	184	156	16762	4.08772
lightsteelblue1	GO:0008276	MF	protein methyltransferase activity	0.0360202	1	3	79	156	16762	4.08033
lightsteelblue1	GO:0016922	MF	nuclear receptor binding	0.0182643	1	4	107	156	16762	4.01677
lightsteelblue1	GO:0008170	MF	N-methyltransferase activity	0.0417581	1	3	83	156	16762	3.88369
lightsteelblue1	GO:0016741	MF	transferase activity, transferring one-carbon groups	0.00214678	0.638754	7	194	156	16762	3.87702
lightsteelblue1	GO:0005125	MF	cytokine activity	0.0150837	1	5	155	156	16762	3.46609
lightsteelblue1	GO:0070851	MF	growth factor receptor binding	0.0348161	1	4	130	156	16762	3.30611
lightsteelblue1	GO:0008757	MF	S-adenosylmethionine-dependent methyltransferase activity	0.0423679	1	4	140	156	16762	3.06996
lightsteelblue1	GO:0035257	MF	nuclear hormone receptor binding	0.0428222	1	4	140	156	16762	3.06996
lightsteelblue1	GO:0005126	MF	cytokine receptor binding	0.00917393	0.940705	7	246	156	16762	3.05748
lightsteelblue1	GO:0061629	MF	RNA polymerase II-specific DNA-binding transcription factor binding	0.0128007	1	7	267	156	16762	2.81701
lightsteelblue1	GO:0004674	MF	protein serine/threonine kinase activity	0.0192433	1	9	424	156	16762	2.28075
lightsteelblue1	GO:0140297	MF	DNA-binding transcription factor binding	0.0429093	1	7	342	156	16762	2.19924
lightsteelblue1	GO:0004842	MF	ubiquitin-protein transferase activity	0.0495496	1	7	358	156	16762	2.10095
lightsteelblue1	GO:0016773	MF	phosphotransferase activity, alcohol group as acceptor	0.0220353	1	12	662	156	16762	1.94771
lightsteelblue1	GO:0016301	MF	kinase activity	0.0371357	1	12	717	156	16762	1.7983
lightsteelblue1	GO:0008134	MF	transcription factor binding	0.0499999	1	11	666	156	16762	1.77468
lightsteelblue1	GO:0016740	MF	transferase activity	0.00142015	0.601325	33	2082	156	16762	1.70308
lightsteelblue1	GO:0140096	MF	catalytic activity, acting on a protein	0.0130332	1	28	1944	156	16762	1.54762
lightsteelblue1	GO:1901363	MF	heterocyclic compound binding	0.0378209	1	52	4460	156	16762	1.25277
lightsteelblue1	GO:0003824	MF	catalytic activity	0.0251763	1	59	5069	156	16762	1.25064
lightsteelblue1	GO:0097159	MF	organic cyclic compound binding	0.0484363	1	52	4528	156	16762	1.23395
lightyellow	GO:0004028	MF	3-chloroallyl aldehyde dehydrogenase activity	0.00908478	1	2	8	343	16762	12.2172
lightyellow	GO:0050072	MF	m7G(5')pppN diphosphatase activity	0.00845898	1	2	8	343	16762	12.2172
lightyellow	GO:1901612	MF	cardiolipin binding	0.0124345	1	2	9	343	16762	10.8597
lightyellow	GO:1901611	MF	phosphatidylglycerol binding	0.017987	1	2	11	343	16762	8.88524
lightyellow	GO:0005005	MF	transmembrane-ephrin receptor activity	0.0237848	1	2	13	343	16762	7.51828
lightyellow	GO:0042923	MF	neuropeptide binding	0.0256313	1	2	13	343	16762	7.51828
lightyellow	GO:0005003	MF	ephrin receptor activity	0.0272333	1	2	14	343	16762	6.98126
lightyellow	GO:0120020	MF	cholesterol transfer activity	0.0338151	1	2	16	343	16762	6.1086
lightyellow	GO:0004029	MF	aldehyde dehydrogenase (NAD+) activity	0.0393467	1	2	17	343	16762	5.74927
lightyellow	GO:0120015	MF	sterol transfer activity	0.0386778	1	2	17	343	16762	5.74927
lightyellow	GO:0008353	MF	RNA polymerase II CTD heptapeptide repeat kinase activity	0.0433704	1	2	18	343	16762	5.42987
lightyellow	GO:0070696	MF	transmembrane receptor protein serine/threonine kinase binding	0.0429716	1	2	18	343	16762	5.42987
lightyellow	GO:0004030	MF	aldehyde dehydrogenase [NAD(P)+] activity	0.0489162	1	2	19	343	16762	5.14408
lightyellow	GO:0008528	MF	G protein-coupled peptide receptor activity	0.0331516	1	5	95	343	16762	2.57204
lightyellow	GO:0001653	MF	peptide receptor activity	0.0414729	1	5	101	343	16762	2.41925
lightyellow	GO:0008236	MF	serine-type peptidase activity	0.0407686	1	6	136	343	16762	2.15598
lightyellow	GO:0016825	MF	hydrolase activity, acting on acid phosphorus-nitrogen bonds	0.0463652	1	6	140	343	16762	2.09438
lightyellow	GO:0017171	MF	serine hydrolase activity	0.0463652	1	6	140	343	16762	2.09438
lightyellow	GO:0004930	MF	G protein-coupled receptor activity	0.00598855	1	13	314	343	16762	2.02323
lightyellow	GO:0004888	MF	transmembrane signaling receptor activity	0.000369647	1	26	677	343	16762	1.87679
lightyellow	GO:0060089	MF	molecular transducer activity	0.00068821	1	29	823	343	16762	1.72199
lightyellow	GO:0038023	MF	signaling receptor activity	0.00068821	1	29	823	343	16762	1.72199
magenta	GO:0010340	MF	carboxyl-O-methyltransferase activity	0.0147076	1	2	7	497	16762	9.6361
magenta	GO:0016778	MF	diphosphotransferase activity	0.0147669	1	2	7	497	16762	9.6361
magenta	GO:0019871	MF	sodium channel inhibitor activity	0.0149386	1	2	7	497	16762	9.6361
magenta	GO:0031995	MF	insulin-like growth factor II binding	0.0144996	1	2	7	497	16762	9.6361
magenta	GO:0046976	MF	histone methyltransferase activity (H3-K27 specific)	0.0141083	1	2	7	497	16762	9.6361
magenta	GO:0051998	MF	protein carboxyl O-methyltransferase activity	0.0147076	1	2	7	497	16762	9.6361
magenta	GO:0031628	MF	opioid receptor binding	0.0195891	1	2	8	497	16762	8.43159
magenta	GO:0003691	MF	double-stranded telomeric DNA binding	0.024133	1	2	9	497	16762	7.49475
magenta	GO:0015386	MF	potassium:proton antiporter activity	0.0237098	1	2	9	497	16762	7.49475
magenta	GO:0015924	MF	mannosyl-oligosaccharide mannosidase activity	0.0254047	1	2	9	497	16762	7.49475
magenta	GO:0015385	MF	sodium:proton antiporter activity	0.0291649	1	2	10	497	16762	6.74527
magenta	GO:0016888	MF	endodeoxyribonuclease activity, producing 5'-phosphomonoesters	0.00772559	1	3	15	497	16762	6.74527
magenta	GO:0005451	MF	monovalent cation:proton antiporter activity	0.0344766	1	2	11	497	16762	6.13207
magenta	GO:0031994	MF	insulin-like growth factor I binding	0.035203	1	2	11	497	16762	6.13207
magenta	GO:0017154	MF	semaphorin receptor activity	0.0433466	1	2	12	497	16762	5.62106
magenta	GO:0050700	MF	CARD domain binding	0.0407111	1	2	12	497	16762	5.62106
magenta	GO:0051139	MF	metal ion:proton antiporter activity	0.0406748	1	2	12	497	16762	5.62106
magenta	GO:0046935	MF	1-phosphatidylinositol-3-kinase regulator activity	0.0465119	1	2	13	497	16762	5.18867
magenta	GO:0034237	MF	protein kinase A regulatory subunit binding	0.0199042	1	3	21	497	16762	4.81805
magenta	GO:0008574	MF	ATP-dependent microtubule motor activity, plus-end-directed	0.0319493	1	3	25	497	16762	4.04716
magenta	GO:0046966	MF	thyroid hormone receptor binding	0.0309526	1	3	25	497	16762	4.04716
magenta	GO:0050699	MF	WW domain binding	0.0352544	1	3	26	497	16762	3.8915
magenta	GO:0016893	MF	endonuclease activity, active with either ribo- or deoxyribonucleic acids and producing 5'-phosphomonoesters	0.0231291	1	4	39	497	16762	3.45911
magenta	GO:0015459	MF	potassium channel regulator activity	0.0246535	1	4	40	497	16762	3.37264
magenta	GO:0001221	MF	transcription cofactor binding	0.0126236	1	5	50	497	16762	3.37264
magenta	GO:0004553	MF	hydrolase activity, hydrolyzing O-glycosyl compounds	0.00985384	1	7	86	497	16762	2.74517
magenta	GO:0030374	MF	nuclear receptor transcription coactivator activity	0.0310503	1	5	63	497	16762	2.6767
magenta	GO:0099106	MF	ion channel regulator activity	0.0159335	1	7	94	497	16762	2.51154
magenta	GO:0030971	MF	receptor tyrosine kinase binding	0.0417712	1	5	68	497	16762	2.47988
magenta	GO:0016798	MF	hydrolase activity, acting on glycosyl bonds	0.0333379	1	7	110	497	16762	2.14622
magenta	GO:0016247	MF	channel regulator activity	0.04774	1	7	118	497	16762	2.00072
magenta	GO:0061659	MF	ubiquitin-like protein ligase activity	0.0266492	1	12	229	497	16762	1.76732
magenta	GO:0061630	MF	ubiquitin protein ligase activity	0.0449275	1	11	221	497	16762	1.67869
magenta	GO:0003677	MF	DNA binding	0.0391504	1	61	1747	497	16762	1.17762
magenta	GO:0046872	MF	metal ion binding	0.0280826	1	105	3167	497	16762	1.11818
magenta	GO:0043169	MF	cation binding	0.0380998	1	106	3241	497	16762	1.10305
maroon	GO:0003857	MF	3-hydroxyacyl-CoA dehydrogenase activity	0.000907171	1	2	8	101	16762	41.4901
maroon	GO:0003995	MF	acyl-CoA dehydrogenase activity	0.00144688	1	2	10	101	16762	33.1921
maroon	GO:0030023	MF	extracellular matrix constituent conferring elasticity	0.0342264	1	1	6	101	16762	27.6601
maroon	GO:0004565	MF	beta-galactosidase activity	0.0342255	1	1	6	101	16762	27.6601
maroon	GO:0008510	MF	sodium:bicarbonate symporter activity	0.0342557	1	1	6	101	16762	27.6601
maroon	GO:0023026	MF	MHC class II protein complex binding	0.0342255	1	1	6	101	16762	27.6601
maroon	GO:0031802	MF	type 5 metabotropic glutamate receptor binding	0.0342255	1	1	6	101	16762	27.6601
maroon	GO:0140410	MF	solute:bicarbonate symporter activity	0.0342557	1	1	6	101	16762	27.6601
maroon	GO:0097493	MF	structural molecule activity conferring elasticity	0.0398168	1	1	7	101	16762	23.7086
maroon	GO:0003747	MF	translation release factor activity	0.0398276	1	1	7	101	16762	23.7086
maroon	GO:0004571	MF	mannosyl-oligosaccharide 1,2-alpha-mannosidase activity	0.039816	1	1	7	101	16762	23.7086
maroon	GO:0004679	MF	AMP-activated protein kinase activity	0.0398171	1	1	7	101	16762	23.7086
maroon	GO:0008079	MF	translation termination factor activity	0.0398276	1	1	7	101	16762	23.7086
maroon	GO:0050693	MF	LBD domain binding	0.0398159	1	1	7	101	16762	23.7086
maroon	GO:0061676	MF	importin-alpha family protein binding	0.0453744	1	1	8	101	16762	20.745
maroon	GO:0004300	MF	enoyl-CoA hydratase activity	0.0453751	1	1	8	101	16762	20.745
maroon	GO:0004862	MF	cAMP-dependent protein kinase inhibitor activity	0.0453753	1	1	8	101	16762	20.745
maroon	GO:0005452	MF	inorganic anion exchanger activity	0.0454045	1	1	8	101	16762	20.745
maroon	GO:0015925	MF	galactosidase activity	0.0453744	1	1	8	101	16762	20.745
maroon	GO:0042609	MF	CD4 receptor binding	0.045381	1	1	8	101	16762	20.745
maroon	GO:0048156	MF	tau protein binding	0.0064783	1	2	21	101	16762	15.8058
maroon	GO:0000062	MF	fatty-acyl-CoA binding	0.00911758	1	2	25	101	16762	13.2768
maroon	GO:1901567	MF	fatty acid derivative binding	0.0146845	1	2	32	101	16762	10.3725
maroon	GO:0032266	MF	phosphatidylinositol-3-phosphate binding	0.0224142	1	2	40	101	16762	8.29802
maroon	GO:0031491	MF	nucleosome binding	0.0339153	1	2	50	101	16762	6.63842
maroon	GO:0008375	MF	acetylglucosaminyltransferase activity	0.0339151	1	2	50	101	16762	6.63842
maroon	GO:0016627	MF	oxidoreductase activity, acting on the CH-CH group of donors	0.0390365	1	2	54	101	16762	6.14668
maroon	GO:0070063	MF	RNA polymerase binding	0.0417025	1	2	56	101	16762	5.92716
maroon	GO:0003727	MF	single-stranded RNA binding	0.0144591	1	3	88	101	16762	5.65774
maroon	GO:0051287	MF	NAD binding	0.0472256	1	2	60	101	16762	5.53201
maroon	GO:0051087	MF	chaperone binding	0.0177181	1	3	95	101	16762	5.24085
maroon	GO:0016616	MF	oxidoreductase activity, acting on the CH-OH group of donors, NAD or NADP as acceptor	0.0247748	1	3	108	101	16762	4.61001
maroon	GO:0016614	MF	oxidoreductase activity, acting on CH-OH group of donors	0.0297653	1	3	116	101	16762	4.29208
maroon	GO:0008194	MF	UDP-glycosyltransferase activity	0.0352451	1	3	124	101	16762	4.01517
maroon	GO:0045182	MF	translation regulator activity	0.0359684	1	3	125	101	16762	3.98305
maroon	GO:0002020	MF	protease binding	0.0404422	1	3	131	101	16762	3.80062
maroon	GO:0003779	MF	actin binding	0.0271156	1	6	395	101	16762	2.52092
maroon	GO:0008047	MF	enzyme activator activity	0.0371763	1	6	426	101	16762	2.33747
maroon	GO:0044877	MF	protein-containing complex binding	0.0414037	1	12	1189	101	16762	1.67496
maroon	GO:0005515	MF	protein binding	0.0145958	1	57	7916	101	16762	1.19502
mediumorchid	GO:0004128	MF	cytochrome-b5 reductase activity, acting on NAD(P)H	0.0263459	1	1	6	77	16762	36.2814
mediumorchid	GO:0004563	MF	beta-N-acetylhexosaminidase activity	0.0265602	1	1	6	77	16762	36.2814
mediumorchid	GO:0004908	MF	interleukin-1 receptor activity	0.0269792	1	1	6	77	16762	36.2814
mediumorchid	GO:0008970	MF	phospholipase A1 activity	0.0268432	1	1	6	77	16762	36.2814
mediumorchid	GO:0032407	MF	MutSalpha complex binding	0.0262576	1	1	6	77	16762	36.2814
mediumorchid	GO:0003916	MF	DNA topoisomerase activity	0.0312544	1	1	7	77	16762	31.0983
mediumorchid	GO:0048406	MF	nerve growth factor binding	0.028688	1	1	7	77	16762	31.0983
mediumorchid	GO:0003857	MF	3-hydroxyacyl-CoA dehydrogenase activity	0.0353471	1	1	8	77	16762	27.211
mediumorchid	GO:0016723	MF	oxidoreductase activity, oxidizing metal ions, NAD or NADP as acceptor	0.0349899	1	1	8	77	16762	27.211
mediumorchid	GO:1990226	MF	histone methyltransferase binding	0.0354193	1	1	8	77	16762	27.211
mediumorchid	GO:0035374	MF	chondroitin sulfate binding	0.0396022	1	1	9	77	16762	24.1876
mediumorchid	GO:0016670	MF	oxidoreductase activity, acting on a sulfur group of donors, oxygen as acceptor	0.0404709	1	1	9	77	16762	24.1876
mediumorchid	GO:0032357	MF	oxidized purine DNA binding	0.0397757	1	1	9	77	16762	24.1876
mediumorchid	GO:0043176	MF	amine binding	0.042815	1	1	10	77	16762	21.7688
mediumorchid	GO:0032404	MF	mismatch repair complex binding	0.0438243	1	1	10	77	16762	21.7688
mediumorchid	GO:0032356	MF	oxidized DNA binding	0.0441235	1	1	10	77	16762	21.7688
mediumorchid	GO:0043121	MF	neurotrophin binding	0.0419032	1	1	10	77	16762	21.7688
mediumorchid	GO:0043208	MF	glycosphingolipid binding	0.0434233	1	1	10	77	16762	21.7688
mediumorchid	GO:0045295	MF	gamma-catenin binding	0.0461937	1	1	11	77	16762	19.7898
mediumorchid	GO:0008641	MF	ubiquitin-like modifier activating enzyme activity	0.0480143	1	1	11	77	16762	19.7898
mediumorchid	GO:0030983	MF	mismatched DNA binding	0.0482953	1	1	11	77	16762	19.7898
mediumorchid	GO:0047372	MF	acylglycerol lipase activity	0.0487366	1	1	11	77	16762	19.7898
mediumorchid	GO:0035064	MF	methylated histone binding	0.0285451	1	2	59	77	16762	7.37926
mediumorchid	GO:0140034	MF	methylation-dependent protein binding	0.0285451	1	2	59	77	16762	7.37926
mediumorchid	GO:0051287	MF	NAD binding	0.029715	1	2	60	77	16762	7.25628
mediumorchid	GO:0016798	MF	hydrolase activity, acting on glycosyl bonds	0.0133517	1	3	110	77	16762	5.93695
mediumorchid	GO:0005201	MF	extracellular matrix structural constituent	0.0209047	1	3	131	77	16762	4.98523
mediumorchid	GO:0019838	MF	growth factor binding	0.0239026	1	3	138	77	16762	4.73235
mediumorchid	GO:0051015	MF	actin filament binding	0.0497766	1	3	184	77	16762	3.54927
mediumorchid	GO:0003779	MF	actin binding	0.0320443	1	5	395	77	16762	2.75555
mediumorchid	GO:0019899	MF	enzyme binding	0.0315194	1	16	2196	77	16762	1.58607
mediumpurple2	GO:0015141	MF	succinate transmembrane transporter activity	0.0163791	1	1	6	47	16762	59.4397
mediumpurple2	GO:0015277	MF	kainate selective glutamate receptor activity	0.0165124	1	1	6	47	16762	59.4397
mediumpurple2	GO:0023026	MF	MHC class II protein complex binding	0.0163464	1	1	6	47	16762	59.4397
mediumpurple2	GO:0051185	MF	coenzyme transmembrane transporter activity	0.0166038	1	1	6	47	16762	59.4397
mediumpurple2	GO:0008381	MF	mechanosensitive ion channel activity	0.000657778	0.883963	2	14	47	16762	50.9483
mediumpurple2	GO:0031957	MF	very long-chain fatty acid-CoA ligase activity	0.021634	1	1	8	47	16762	44.5798
mediumpurple2	GO:0005347	MF	ATP transmembrane transporter activity	0.0272177	1	1	10	47	16762	35.6638
mediumpurple2	GO:0023023	MF	MHC protein complex binding	0.0296439	1	1	11	47	16762	32.4217
mediumpurple2	GO:0070679	MF	inositol 1,4,5 trisphosphate binding	0.0297033	1	1	11	47	16762	32.4217
mediumpurple2	GO:0140326	MF	ATPase-coupled intramembrane lipid transporter activity	0.02984	1	1	11	47	16762	32.4217
mediumpurple2	GO:0008525	MF	phosphatidylcholine transporter activity	0.0326161	1	1	12	47	16762	29.7199
mediumpurple2	GO:0015556	MF	C4-dicarboxylate transmembrane transporter activity	0.032377	1	1	12	47	16762	29.7199
mediumpurple2	GO:0015643	MF	toxic substance binding	0.0347371	1	1	13	47	16762	27.4337
mediumpurple2	GO:0015116	MF	sulfate transmembrane transporter activity	0.035249	1	1	13	47	16762	27.4337
mediumpurple2	GO:0000295	MF	adenine nucleotide transmembrane transporter activity	0.037784	1	1	14	47	16762	25.4742
mediumpurple2	GO:0005346	MF	purine ribonucleotide transmembrane transporter activity	0.037784	1	1	14	47	16762	25.4742
mediumpurple2	GO:0015216	MF	purine nucleotide transmembrane transporter activity	0.037784	1	1	14	47	16762	25.4742
mediumpurple2	GO:0015645	MF	fatty acid ligase activity	0.0376403	1	1	14	47	16762	25.4742
mediumpurple2	GO:0004653	MF	polypeptide N-acetylgalactosaminyltransferase activity	0.040283	1	1	15	47	16762	23.7759
mediumpurple2	GO:0051184	MF	cofactor transmembrane transporter activity	0.0457936	1	1	17	47	16762	20.9787
mediumpurple2	GO:0015101	MF	organic cation transmembrane transporter activity	0.0456615	1	1	17	47	16762	20.9787
mediumpurple2	GO:0015215	MF	nucleotide transmembrane transporter activity	0.0457282	1	1	17	47	16762	20.9787
mediumpurple2	GO:0016405	MF	CoA-ligase activity	0.0456785	1	1	17	47	16762	20.9787
mediumpurple2	GO:0004970	MF	ionotropic glutamate receptor activity	0.0482908	1	1	18	47	16762	19.8132
mediumpurple2	GO:0070402	MF	NADPH binding	0.0482181	1	1	18	47	16762	19.8132
mediumpurple2	GO:0099094	MF	ligand-gated cation channel activity	0.0187593	1	2	77	47	16762	9.26333
mediumpurple2	GO:0004222	MF	metalloendopeptidase activity	0.0238577	1	2	87	47	16762	8.19858
mediumpurple2	GO:0051087	MF	chaperone binding	0.0279129	1	2	95	47	16762	7.50817
mediumpurple2	GO:0015276	MF	ligand-gated ion channel activity	0.0304944	1	2	100	47	16762	7.13277
mediumpurple2	GO:0022834	MF	ligand-gated channel activity	0.0322053	1	2	103	47	16762	6.92502
mediumpurple2	GO:0030165	MF	PDZ domain binding	0.0377537	1	2	112	47	16762	6.36854
mediumpurple2	GO:0005178	MF	integrin binding	0.0434879	1	2	121	47	16762	5.89485
mediumpurple2	GO:0004713	MF	protein tyrosine kinase activity	0.0442191	1	2	122	47	16762	5.84653
mediumpurple2	GO:0022836	MF	gated channel activity	0.00606384	1	4	267	47	16762	5.3429
mediumpurple2	GO:0005216	MF	ion channel activity	0.0135857	1	4	338	47	16762	4.22057
mediumpurple2	GO:0022803	MF	passive transmembrane transporter activity	0.017537	1	4	365	47	16762	3.90836
mediumpurple2	GO:0015267	MF	channel activity	0.017537	1	4	365	47	16762	3.90836
mediumpurple2	GO:0015075	MF	ion transmembrane transporter activity	0.0112923	1	6	695	47	16762	3.07889
mediumpurple2	GO:0022857	MF	transmembrane transporter activity	0.00742435	1	7	839	47	16762	2.97553
mediumpurple2	GO:0015318	MF	inorganic molecular entity transmembrane transporter activity	0.032048	1	5	651	47	16762	2.73916
mediumpurple2	GO:0005215	MF	transporter activity	0.0140731	1	7	949	47	16762	2.63063
mediumpurple2	GO:0017111	MF	nucleoside-triphosphatase activity	0.0453982	1	5	716	47	16762	2.49049
mediumpurple2	GO:0042802	MF	identical protein binding	0.0173356	1	10	1735	47	16762	2.05555
mediumpurple2	GO:0043167	MF	ion binding	0.0318976	1	20	4969	47	16762	1.43545
mediumpurple2	GO:0005488	MF	binding	0.0120215	1	38	11141	47	16762	1.21643
mediumpurple3	GO:0030306	MF	ADP-ribosylation factor binding	0.00224535	0.474426	2	8	158	16762	26.5222
mediumpurple3	GO:0070016	MF	armadillo repeat domain binding	0.00357081	0.649769	2	10	158	16762	21.2177
mediumpurple3	GO:0000014	MF	single-stranded DNA endodeoxyribonuclease activity	0.00440029	0.733429	2	11	158	16762	19.2888
mediumpurple3	GO:0004529	MF	exodeoxyribonuclease activity	0.00122816	0.388319	3	23	158	16762	13.8376
mediumpurple3	GO:0000400	MF	four-way junction DNA binding	0.00914768	0.863307	2	16	158	16762	13.2611
mediumpurple3	GO:0017160	MF	Ral GTPase binding	0.00950281	0.863307	2	16	158	16762	13.2611
mediumpurple3	GO:0016895	MF	exodeoxyribonuclease activity, producing 5'-phosphomonoesters	0.0162152	1	2	21	158	16762	10.1037
mediumpurple3	GO:0008175	MF	tRNA methyltransferase activity	0.00314675	0.592182	3	32	158	16762	9.94581
mediumpurple3	GO:0001530	MF	lipopolysaccharide binding	0.0193935	1	2	23	158	16762	9.2251
mediumpurple3	GO:0000217	MF	DNA secondary structure binding	0.0187482	1	2	23	158	16762	9.2251
mediumpurple3	GO:0046966	MF	thyroid hormone receptor binding	0.0221118	1	2	25	158	16762	8.48709
mediumpurple3	GO:0005158	MF	insulin receptor binding	0.0240136	1	2	26	158	16762	8.16066
mediumpurple3	GO:0004536	MF	deoxyribonuclease activity	0.00157364	0.427759	4	54	158	16762	7.85842
mediumpurple3	GO:0004527	MF	exonuclease activity	0.000533561	0.272726	5	72	158	16762	7.36726
mediumpurple3	GO:0051959	MF	dynein light intermediate chain binding	0.0294792	1	2	29	158	16762	7.31646
mediumpurple3	GO:0030331	MF	estrogen receptor binding	0.00772975	0.863307	3	44	158	16762	7.23331
mediumpurple3	GO:0008173	MF	RNA methyltransferase activity	0.00241521	0.492389	4	61	158	16762	6.95663
mediumpurple3	GO:0008408	MF	3'-5' exonuclease activity	0.00929966	0.863307	3	47	158	16762	6.77161
mediumpurple3	GO:0016796	MF	exonuclease activity, active with either ribo- or deoxyribonucleic acids and producing 5'-phosphomonoesters	0.0105248	0.89611	3	49	158	16762	6.49522
mediumpurple3	GO:0017046	MF	peptide hormone binding	0.0368651	1	2	33	158	16762	6.42961
mediumpurple3	GO:0042974	MF	retinoic acid receptor binding	0.0371601	1	2	33	158	16762	6.42961
mediumpurple3	GO:0008536	MF	Ran GTPase binding	0.0410778	1	2	35	158	16762	6.06221
mediumpurple3	GO:0042162	MF	telomeric DNA binding	0.0411349	1	2	35	158	16762	6.06221
mediumpurple3	GO:0017112	MF	Rab guanyl-nucleotide exchange factor activity	0.0431664	1	2	36	158	16762	5.89381
mediumpurple3	GO:0004521	MF	endoribonuclease activity	0.0141704	1	3	55	158	16762	5.78665
mediumpurple3	GO:0008168	MF	methyltransferase activity	8.41266e-06	0.0264614	10	184	158	16762	5.76569
mediumpurple3	GO:0004520	MF	endodeoxyribonuclease activity	0.0460157	1	2	37	158	16762	5.73452
mediumpurple3	GO:0016741	MF	transferase activity, transferring one-carbon groups	1.33364e-05	0.0326268	10	194	158	16762	5.46848
mediumpurple3	GO:0008757	MF	S-adenosylmethionine-dependent methyltransferase activity	0.000323859	0.203735	7	140	158	16762	5.30443
mediumpurple3	GO:0017137	MF	Rab GTPase binding	0.000119773	0.119871	8	160	158	16762	5.30443
mediumpurple3	GO:0140101	MF	catalytic activity, acting on a tRNA	0.00395337	0.694564	5	113	158	16762	4.69419
mediumpurple3	GO:0035257	MF	nuclear hormone receptor binding	0.00191371	0.463294	6	140	158	16762	4.54665
mediumpurple3	GO:0004540	MF	ribonuclease activity	0.0128903	0.995269	4	98	158	16762	4.33015
mediumpurple3	GO:0004518	MF	nuclease activity	0.00125344	0.388319	7	176	158	16762	4.21943
mediumpurple3	GO:0015294	MF	solute:cation symporter activity	0.0329298	1	3	76	158	16762	4.18771
mediumpurple3	GO:0005096	MF	GTPase activator activity	0.000302745	0.201995	9	231	158	16762	4.13332
mediumpurple3	GO:0035258	MF	steroid hormone receptor binding	0.0378497	1	3	80	158	16762	3.97832
mediumpurple3	GO:0016922	MF	nuclear receptor binding	0.0173291	1	4	107	158	16762	3.96593
mediumpurple3	GO:0051427	MF	hormone receptor binding	0.00397471	0.694564	6	162	158	16762	3.92921
mediumpurple3	GO:0005085	MF	guanyl-nucleotide exchange factor activity	0.00212128	0.474426	7	193	158	16762	3.84777
mediumpurple3	GO:0008170	MF	N-methyltransferase activity	0.0417734	1	3	83	158	16762	3.83453
mediumpurple3	GO:0030695	MF	GTPase regulator activity	0.000521657	0.272726	9	249	158	16762	3.83453
mediumpurple3	GO:0031267	MF	small GTPase binding	7.25566e-06	0.0264614	15	416	158	16762	3.82531
mediumpurple3	GO:0004519	MF	endonuclease activity	0.020234	1	4	112	158	16762	3.78888
mediumpurple3	GO:0017016	MF	Ras GTPase binding	2.12663e-05	0.0408906	14	401	158	16762	3.70384
mediumpurple3	GO:0051020	MF	GTPase binding	4.84412e-06	0.0239461	17	509	158	16762	3.54323
mediumpurple3	GO:0140097	MF	catalytic activity, acting on DNA	0.0074272	0.863307	6	185	158	16762	3.44071
mediumpurple3	GO:0060589	MF	nucleoside-triphosphatase regulator activity	0.00143631	0.410709	9	287	158	16762	3.32682
mediumpurple3	GO:0140098	MF	catalytic activity, acting on RNA	0.00125127	0.388319	10	340	158	16762	3.12025
mediumpurple3	GO:0003714	MF	transcription corepressor activity	0.0241081	1	5	177	158	16762	2.99685
mediumpurple3	GO:0008022	MF	protein C-terminus binding	0.0178815	1	6	224	158	16762	2.84166
mediumpurple3	GO:0061629	MF	RNA polymerase II-specific DNA-binding transcription factor binding	0.0378273	1	6	267	158	16762	2.38401
mediumpurple3	GO:0003682	MF	chromatin binding	0.0041577	0.715189	12	536	158	16762	2.37512
mediumpurple3	GO:0019787	MF	ubiquitin-like protein transferase activity	0.0245052	1	8	378	158	16762	2.24526
mediumpurple3	GO:0008047	MF	enzyme activator activity	0.0177142	1	9	426	158	16762	2.24131
mediumpurple3	GO:0140297	MF	DNA-binding transcription factor binding	0.0396272	1	7	342	158	16762	2.1714
mediumpurple3	GO:0004842	MF	ubiquitin-protein transferase activity	0.0490547	1	7	358	158	16762	2.07436
mediumpurple3	GO:0008134	MF	transcription factor binding	0.0088366	0.863307	13	666	158	16762	2.0708
mediumpurple3	GO:0016740	MF	transferase activity	0.000614273	0.287767	34	2082	158	16762	1.73247
mediumpurple3	GO:0005524	MF	ATP binding	0.0340712	1	19	1313	158	16762	1.53517
mediumpurple3	GO:0008144	MF	drug binding	0.0368496	1	21	1503	158	16762	1.48228
mediumpurple3	GO:0032559	MF	adenyl ribonucleotide binding	0.047688	1	19	1366	158	16762	1.47561
mediumpurple3	GO:0003677	MF	DNA binding	0.0306681	1	24	1747	158	16762	1.45743
mediumpurple3	GO:0019899	MF	enzyme binding	0.0289356	1	29	2196	158	16762	1.40099
mediumpurple3	GO:0003676	MF	nucleic acid binding	0.0244051	1	35	2727	158	16762	1.36161
mediumpurple3	GO:0097159	MF	organic cyclic compound binding	0.0122761	0.979327	55	4528	158	16762	1.28862
mediumpurple3	GO:1901363	MF	heterocyclic compound binding	0.0141318	1	54	4460	158	16762	1.28448
mediumpurple3	GO:0003824	MF	catalytic activity	0.0221926	1	59	5069	158	16762	1.23481
mediumpurple3	GO:0043167	MF	ion binding	0.0327129	1	57	4969	158	16762	1.21696
midnightblue	GO:0017162	MF	aryl hydrocarbon receptor binding	0.00108879	1	3	10	388	16762	12.9603
midnightblue	GO:0004143	MF	diacylglycerol kinase activity	0.0183239	1	2	10	388	16762	8.64021
midnightblue	GO:0003951	MF	NAD+ kinase activity	0.0269683	1	2	12	388	16762	7.20017
midnightblue	GO:0034713	MF	type I transforming growth factor beta receptor binding	0.0270801	1	2	12	388	16762	7.20017
midnightblue	GO:0004535	MF	poly(A)-specific ribonuclease activity	0.0308301	1	2	13	388	16762	6.64631
midnightblue	GO:0001091	MF	RNA polymerase II general transcription initiation factor binding	0.00811819	1	3	20	388	16762	6.48015
midnightblue	GO:0043274	MF	phospholipase binding	0.00870491	1	3	20	388	16762	6.48015
midnightblue	GO:1990404	MF	protein ADP-ribosylase activity	0.0351995	1	2	14	388	16762	6.17158
midnightblue	GO:0005024	MF	transforming growth factor beta-activated receptor activity	0.0359103	1	2	14	388	16762	6.17158
midnightblue	GO:0050811	MF	GABA receptor binding	0.0349456	1	2	14	388	16762	6.17158
midnightblue	GO:0050780	MF	dopamine receptor binding	0.0117544	1	3	22	388	16762	5.89105
midnightblue	GO:0004712	MF	protein serine/threonine/tyrosine kinase activity	0.00138418	1	5	38	388	16762	5.68435
midnightblue	GO:0044390	MF	ubiquitin-like protein conjugating enzyme binding	0.00117724	1	5	38	388	16762	5.68435
midnightblue	GO:0004675	MF	transmembrane receptor protein serine/threonine kinase activity	0.0457889	1	2	16	388	16762	5.40013
midnightblue	GO:0098531	MF	ligand-activated transcription factor activity	0.0332791	1	3	33	388	16762	3.92737
midnightblue	GO:0004879	MF	nuclear receptor activity	0.0332791	1	3	33	388	16762	3.92737
midnightblue	GO:0031624	MF	ubiquitin conjugating enzyme binding	0.0322992	1	3	33	388	16762	3.92737
midnightblue	GO:0001098	MF	basal transcription machinery binding	0.00643861	1	5	55	388	16762	3.92737
midnightblue	GO:0001099	MF	basal RNA polymerase II transcription machinery binding	0.00643861	1	5	55	388	16762	3.92737
midnightblue	GO:0070063	MF	RNA polymerase binding	0.00712924	1	5	56	388	16762	3.85723
midnightblue	GO:0043014	MF	alpha-tubulin binding	0.0390372	1	3	35	388	16762	3.70295
midnightblue	GO:0017069	MF	snRNA binding	0.0453164	1	3	37	388	16762	3.50279
midnightblue	GO:0043621	MF	protein self-association	0.0340317	1	4	57	388	16762	3.03165
midnightblue	GO:0004713	MF	protein tyrosine kinase activity	0.0168497	1	7	122	388	16762	2.47875
midnightblue	GO:0015631	MF	tubulin binding	0.0449128	1	12	318	388	16762	1.63023
navajowhite2	GO:0050291	MF	sphingosine N-acyltransferase activity	0.000886276	1	2	7	122	16762	39.2553
navajowhite2	GO:0046790	MF	virion binding	0.0399266	1	1	6	122	16762	22.8989
navajowhite2	GO:0015616	MF	DNA translocase activity	0.0404838	1	1	6	122	16762	22.8989
navajowhite2	GO:1901474	MF	azole transmembrane transporter activity	0.0329014	1	1	6	122	16762	22.8989
navajowhite2	GO:0035240	MF	dopamine binding	0.0404067	1	1	6	122	16762	22.8989
navajowhite2	GO:0043546	MF	molybdopterin cofactor binding	0.0413289	1	1	6	122	16762	22.8989
navajowhite2	GO:0016936	MF	galactoside binding	0.0410109	1	1	6	122	16762	22.8989
navajowhite2	GO:0030151	MF	molybdenum ion binding	0.0416071	1	1	6	122	16762	22.8989
navajowhite2	GO:0047184	MF	1-acylglycerophosphocholine O-acyltransferase activity	0.0389945	1	1	6	122	16762	22.8989
navajowhite2	GO:0120170	MF	intraciliary transport particle B binding	0.0462906	1	1	7	122	16762	19.6276
navajowhite2	GO:0004767	MF	sphingomyelin phosphodiesterase activity	0.046127	1	1	7	122	16762	19.6276
navajowhite2	GO:0015180	MF	L-alanine transmembrane transporter activity	0.0459565	1	1	7	122	16762	19.6276
navajowhite2	GO:0015187	MF	glycine transmembrane transporter activity	0.0476318	1	1	7	122	16762	19.6276
navajowhite2	GO:0015193	MF	L-proline transmembrane transporter activity	0.0473259	1	1	7	122	16762	19.6276
navajowhite2	GO:0016413	MF	O-acetyltransferase activity	0.0445506	1	1	7	122	16762	19.6276
navajowhite2	GO:0016503	MF	pheromone receptor activity	0.0450215	1	1	7	122	16762	19.6276
navajowhite2	GO:0022858	MF	alanine transmembrane transporter activity	0.0459565	1	1	7	122	16762	19.6276
navajowhite2	GO:0032050	MF	clathrin heavy chain binding	0.0461568	1	1	7	122	16762	19.6276
navajowhite2	GO:0070883	MF	pre-miRNA binding	0.0479903	1	1	7	122	16762	19.6276
navajowhite2	GO:0017110	MF	nucleoside-diphosphatase activity	0.00399307	1	2	14	122	16762	19.6276
navajowhite2	GO:0070577	MF	lysine-acetylated histone binding	0.00558714	1	2	17	122	16762	16.1639
navajowhite2	GO:0140033	MF	acetylation-dependent protein binding	0.00558714	1	2	17	122	16762	16.1639
navajowhite2	GO:0090482	MF	vitamin transmembrane transporter activity	0.00722926	1	2	19	122	16762	14.4625
navajowhite2	GO:0043015	MF	gamma-tubulin binding	0.0169826	1	2	29	122	16762	9.47541
navajowhite2	GO:0031369	MF	translation initiation factor binding	0.0245179	1	2	36	122	16762	7.63297
navajowhite2	GO:0003743	MF	translation initiation factor activity	0.0392339	1	2	46	122	16762	5.97363
navajowhite2	GO:0001102	MF	RNA polymerase II activating transcription factor binding	0.0418331	1	2	48	122	16762	5.72473
navajowhite2	GO:0005546	MF	phosphatidylinositol-4,5-bisphosphate binding	0.0143675	1	3	75	122	16762	5.49574
[truncated: 1,472 more rows]
