# Supplementary material for: Microglia show differential transcriptomic response to Aβ peptide aggregates ex vivo and in vivo
Source: Life Sci Alliance. 2021 Jun 14;4(7):e202101108. doi: 10.26508/lsa.202101108 (PMC8321667; doi:10.26508/lsa.202101108)
Supplement: Supplementary file 35 [file LSA-2021-01108_TableS35.xlsx]

## Sheet: 1_DEGs_Tg_vs_nTg_3mon
GeneStableID	symbol	entrezid	baseMean	log2FoldChange	lfcSE	stat	pvalue	padj
ENSMUSG00000030505	Prmt3	71974	656.357	-0.718566	0.0649873	-11.057	2.02705e-28	5.68992e-24
ENSMUSG00000022892	App	11820	71150.5	0.735909	0.080074	9.19036	3.91546e-20	5.49535e-16
ENSMUSG00000067642	Adgrf3	381628	21.3567	5.67318	0.819061	6.92645	4.31527e-12	3.48428e-08
ENSMUSG00000081229	Lamr1-ps1	79234	4.51719	-25.5795	3.70364	-6.90657	4.96514e-12	3.48428e-08
ENSMUSG00000068129	Cst7	13011	213.32	1.91245	0.309434	6.18047	6.3911e-10	3.58796e-06
ENSMUSG00000021364	Elovl2	54326	621.479	-0.282745	0.0487898	-5.79516	6.82579e-09	2.73714e-05
ENSMUSG00000050370	Ch25h	12642	23.6917	2.43948	0.419504	5.81517	6.05734e-09	2.73714e-05
ENSMUSG00000021342	Prl	19109	150.193	-8.14569	1.43214	-5.6878	1.2869e-08	4.51542e-05
ENSMUSG00000028362	Tnfsf8	21949	17.5562	3.12844	0.556256	5.62411	1.86472e-08	5.81585e-05
ENSMUSG00000021273	Fdft1	14137	3581.47	0.376471	0.0679717	5.53864	3.0483e-08	8.55659e-05
ENSMUSG00000007682	Dio2	13371	2154.02	-0.467648	0.0898	-5.20766	1.91237e-07	0.000488002
ENSMUSG00000024378	Stard4	170459	1850.47	0.39055	0.0757926	5.15287	2.56527e-07	0.000600058
ENSMUSG00000039728	Slc6a5	104245	183.604	2.67495	0.527861	5.06752	4.03037e-07	0.00087025
ENSMUSG00000059743	Fdps	110196	2222.96	0.368706	0.0730881	5.04468	4.54283e-07	0.000910838
ENSMUSG00000031349	Nsdhl	18194	1019.34	0.337684	0.0684276	4.93491	8.01868e-07	0.00150056
ENSMUSG00000039323	Igfbp2	16008	1079.69	-0.534446	0.109687	-4.87246	1.1022e-06	0.00193367
ENSMUSG00000031283	Chrdl1	83453	616.804	-0.490462	0.10367	-4.73097	2.23445e-06	0.00368947
ENSMUSG00000053175	Bcl3	12051	31.965	1.2364	0.262541	4.70935	2.48507e-06	0.00387533
ENSMUSG00000017724	Etv4	18612	397.361	-0.431644	0.0918868	-4.69757	2.63279e-06	0.0038896
ENSMUSG00000032193	Ldlr	16835	1252.99	0.392022	0.086772	4.51785	6.24721e-06	0.00876796
ENSMUSG00000018740	Slc25a35	71998	214.824	-0.226267	0.0510773	-4.42989	9.42831e-06	0.0126025
ENSMUSG00000022351	Sqle	20775	2842.86	0.316766	0.0729748	4.34077	1.41987e-05	0.0181163
ENSMUSG00000037405	Icam1	15894	84.4401	1.20596	0.278542	4.32955	1.49415e-05	0.0182352
ENSMUSG00000051439	Cd14	12475	110.968	0.942044	0.219664	4.28857	1.79829e-05	0.0210325
ENSMUSG00000066363	Serpina3f	238393	3.75677	3.41227	0.820201	4.16028	3.17856e-05	0.0356889
ENSMUSG00000023832	Acat2	110460	1398.32	0.244034	0.0591829	4.12339	3.7334e-05	0.0388136
ENSMUSG00000037406	Htra4	330723	23.8268	0.767342	0.185739	4.1313	3.60722e-05	0.0388136
ENSMUSG00000020805	Slc13a5	237831	418.153	-0.27346	0.0665856	-4.1069	4.01011e-05	0.0402014
ENSMUSG00000026822	Lcn2	16819	29.3736	2.36938	0.592136	4.00141	6.29649e-05	0.0593402
ENSMUSG00000038295	Atg9b	213948	277.431	0.313777	0.07845	3.99971	6.34202e-05	0.0593402
ENSMUSG00000068428	Gmnc	239789	54.0832	-0.545041	0.136919	-3.98074	6.87011e-05	0.0622078
ENSMUSG00000045502	Hcar2	80885	20.5842	1.84847	0.466186	3.9651	7.33654e-05	0.0643552
ENSMUSG00000003541	Ier3	15937	281.124	0.3882	0.0999685	3.88323	0.00010308	0.0782014
ENSMUSG00000020713	Gh	14599	28.7725	-5.76293	1.48083	-3.89168	9.95515e-05	0.0782014
ENSMUSG00000048148	Nwd1	319555	3020.56	-0.26704	0.0682924	-3.91025	9.22014e-05	0.0782014
ENSMUSG00000090610	Gm3571	100041907	189.609	0.397837	0.101958	3.90196	9.54171e-05	0.0782014
ENSMUSG00000098943	Rnu3b1	19858	33.994	-2.55646	0.657887	-3.88587	0.000101965	0.0782014
ENSMUSG00000083218	Gm16425	670326	5.08142	1.48266	0.38345	3.86663	0.000110351	0.0815146
ENSMUSG00000058741	Prr19	623131	3.71753	1.78084	0.46593	3.82212	0.000132308	0.0952278
ENSMUSG00000018927	Ccl6	20305	91.6746	0.925217	0.243237	3.80377	0.000142511	0.0991539
ENSMUSG00000025488	Cox8b	12869	20.0145	-0.825865	0.223684	-3.6921	0.000222412	0.148645
ENSMUSG00000056054	S100a8	20201	45.243	1.90485	0.519301	3.66811	0.000244348	0.159508
ENSMUSG00000038572	Bpifb5	228802	3.40011	2.23846	0.612436	3.655	0.000257178	0.164068
ENSMUSG00000000982	Ccl3	20302	32.2799	1.14005	0.313546	3.63599	0.00027692	0.169562
ENSMUSG00000024421	Lama3	16774	371.735	-0.349885	0.0968157	-3.61393	0.000301589	0.169562
ENSMUSG00000035818	Plekhs1	226245	32.4642	-0.474032	0.131182	-3.61355	0.000302035	0.169562
ENSMUSG00000037712	Fermt2	218952	2898.24	-0.176243	0.0486327	-3.62395	0.000290138	0.169562
ENSMUSG00000086544	Chn1os3	329427	195.395	-0.24784	0.0682886	-3.6293	0.000284193	0.169562
ENSMUSG00000037010	Apln	30878	813.684	-0.335433	0.0933601	-3.5929	0.000327018	0.179988
ENSMUSG00000025533	Asl	109900	685.52	0.223942	0.062649	3.57455	0.000350826	0.182365
ENSMUSG00000040557	Mettl27	79565	342.805	0.27732	0.0773942	3.58321	0.000339393	0.182365
ENSMUSG00000084946	Dlx1as	111970	138.832	-0.408382	0.114096	-3.57929	0.000344525	0.182365
ENSMUSG00000060735	Rxfp3	239336	173.487	0.353734	0.100359	3.5247	0.000423955	0.212508
ENSMUSG00000086996	4933416E14Rik	102640864	9.75362	-1.04188	0.295411	-3.52688	0.000420493	0.212508
ENSMUSG00000039672	Kcne2	246133	53.1599	-1.07734	0.307182	-3.50718	0.000452882	0.214249
ENSMUSG00000040026	Saa3	20210	2.27236	3.47773	0.989948	3.51304	0.000443007	0.214249
ENSMUSG00000040046	Tph1	21990	13.6032	-1.52389	0.433569	-3.51476	0.000440145	0.214249
ENSMUSG00000084938	BB557941	767815	12.2131	-0.886107	0.252869	-3.50421	0.00045796	0.214249
ENSMUSG00000045868	Gvin1	74558	2.08567	2.47743	0.710656	3.48612	0.00049009	0.225522
ENSMUSG00000030592	Ryr1	20190	1470.62	-0.402631	0.116567	-3.45407	0.000552201	0.250005
ENSMUSG00000031932	Gpr83	14608	1347.75	-0.176025	0.0511638	-3.44043	0.000580789	0.258774
ENSMUSG00000060961	Slc4a4	54403	8243.09	-0.197564	0.0575065	-3.4355	0.000591464	0.259412
ENSMUSG00000000889	Dbh	13166	11.8574	-0.942133	0.276614	-3.40595	0.000659343	0.2768
ENSMUSG00000026579	F5	14067	96.3263	-1.13863	0.334361	-3.40539	0.000660691	0.2768
ENSMUSG00000041481	Serpina3g	20715	40.804	0.790339	0.231789	3.40973	0.000650277	0.2768
ENSMUSG00000025950	Idh1	15926	1820.49	0.232943	0.069022	3.37491	0.000738408	0.304399
ENSMUSG00000061132	Blnk	17060	302.998	0.378199	0.112183	3.37126	0.000748256	0.304399
ENSMUSG00000059089	Fcgr4	246256	16.9495	1.57154	0.467085	3.36458	0.000766605	0.307409
ENSMUSG00000053113	Socs3	12702	139.48	0.40349	0.120735	3.34196	0.00083189	0.328889
ENSMUSG00000030862	Cpxm2	55987	117.291	-0.286143	0.0858905	-3.33148	0.000863843	0.336779
ENSMUSG00000059108	Ifitm6	213002	10.2512	1.22113	0.367148	3.32599	0.00088105	0.338782
ENSMUSG00000031430	Vsig1	78789	0.992413	2.4608	0.744893	3.30356	0.000954671	0.3526
ENSMUSG00000048572	Tmem252	226040	79.8396	0.785988	0.237883	3.3041	0.00095281	0.3526
ENSMUSG00000030095	Tmem43	74122	1436.42	0.14032	0.0426206	3.29231	0.000993664	0.362236
ENSMUSG00000001588	Acap1	216859	24.3195	-0.6991	0.213983	-3.26709	0.00108659	0.379922
ENSMUSG00000038587	Akap12	83397	1882.25	0.34152	0.104577	3.26572	0.00109185	0.379922
ENSMUSG00000040935	Padi6	242726	11.7269	0.672633	0.206106	3.26352	0.00110036	0.379922
ENSMUSG00000046818	Ddit4l	73284	741.901	-0.347628	0.106409	-3.2669	0.00108734	0.379922
ENSMUSG00000101344	Gm29183	102633781	3.30759	-1.31656	0.403718	-3.26109	0.00110985	0.379922
ENSMUSG00000005357	Slc1a6	20513	465.034	0.227718	0.0705952	3.22569	0.0012567	0.394943
ENSMUSG00000021318	Gli3	14634	451.89	-0.168624	0.0523621	-3.22034	0.00128037	0.394943
ENSMUSG00000022463	Srebf2	20788	9267.25	0.186309	0.0578072	3.22294	0.00126883	0.394943
ENSMUSG00000022759	Lrrc74b	74685	58.9364	-0.489358	0.150887	-3.2432	0.00118195	0.394943
ENSMUSG00000031342	Gpm6b	14758	33301.1	-0.190048	0.0587777	-3.23333	0.00122355	0.394943
ENSMUSG00000031659	Adcy7	11513	702.892	0.265611	0.0818306	3.24586	0.00117096	0.394943
ENSMUSG00000043020	Wdr63	242253	39.7595	-0.972848	0.30199	-3.22146	0.00127539	0.394943
ENSMUSG00000056394	Lig1	16881	580.914	0.219446	0.0680978	3.22251	0.00127072	0.394943
ENSMUSG00000073988	Ttpa	50500	152.336	-0.321768	0.0995003	-3.23384	0.00122139	0.394943
ENSMUSG00000020581	Agr2	23795	3.70881	1.3028	0.405045	3.21644	0.00129789	0.395999
ENSMUSG00000047686	Rtl3	213436	12.6505	-0.846264	0.263638	-3.20994	0.00132761	0.397687
ENSMUSG00000097789	Gm2115	100039239	361.765	-0.355625	0.11082	-3.20905	0.00133176	0.397687
ENSMUSG00000035245	Eogt	101351	1069.25	-0.17291	0.0539608	-3.20436	0.00135361	0.399957
ENSMUSG00000041205	Map6d1	208158	1953.73	-0.168703	0.052873	-3.19071	0.00141921	0.414972
ENSMUSG00000020399	Havcr2	171285	149.394	0.331036	0.104917	3.15521	0.00160381	0.44054
ENSMUSG00000028011	Tdo2	56720	47.6268	-0.480796	0.151983	-3.16348	0.00155897	0.44054
ENSMUSG00000044772	Sntn	218739	13.06	-0.883338	0.279271	-3.16301	0.00156146	0.44054
ENSMUSG00000046687	Gm5424	432466	651.549	0.232334	0.0738204	3.14729	0.00164791	0.44054
ENSMUSG00000062210	Tnfaip8	106869	398.352	-0.201429	0.0638881	-3.15284	0.00161688	0.44054
ENSMUSG00000070777	Ceacam20	71601	3.74548	1.46335	0.462843	3.16165	0.00156878	0.44054
ENSMUSG00000097487	Ptges3l	73635	52.8469	-0.300158	0.095137	-3.15501	0.00160494	0.44054
ENSMUSG00000097792	Gm27042	102636239	196.58	-0.189106	0.0598727	-3.15847	0.00158602	0.44054
ENSMUSG00000028807	Zbtb8a	73680	172.177	-0.187571	0.0597324	-3.14019	0.00168838	0.447102
ENSMUSG00000039050	Osbpl2	228983	2514.53	0.0854447	0.0272459	3.13605	0.00171238	0.449219
ENSMUSG00000026500	Cox20	66359	11.6101	-0.628515	0.200594	-3.13328	0.00172867	0.449293
ENSMUSG00000034110	Kctd7	212919	718.948	0.136518	0.0436358	3.12858	0.00175653	0.452346
ENSMUSG00000029380	Cxcl1	14825	3.59097	2.22423	0.715234	3.1098	0.00187216	0.47774
ENSMUSG00000057457	Phex	18675	40.5147	-0.459141	0.148497	-3.09191	0.00198872	0.498422
ENSMUSG00000079293	Clec7a	56644	92.1886	0.992953	0.32089	3.09437	0.00197229	0.498422
ENSMUSG00000034210	Efcab14	230648	2361.87	-0.127926	0.0414242	-3.0882	0.00201376	0.500232
ENSMUSG00000027160	Ccdc34	68201	447.912	-0.176919	0.057878	-3.05676	0.00223744	0.510748
ENSMUSG00000030748	Il4ra	16190	284.353	0.308778	0.10069	3.06664	0.00216481	0.510748
ENSMUSG00000032802	Srxn1	76650	4144.76	0.155723	0.0507161	3.07049	0.00213709	0.510748
ENSMUSG00000034926	Dhcr24	74754	4247.98	0.246964	0.0805872	3.06455	0.00217997	0.510748
ENSMUSG00000035129	Gm6781	627717	110.598	0.351405	0.115019	3.0552	0.00224913	0.510748
ENSMUSG00000036437	Npy1r	18166	980.561	-0.16787	0.0546376	-3.07242	0.00212332	0.510748
ENSMUSG00000037086	Prr32	68800	20.5233	-1.15997	0.379431	-3.05713	0.00223471	0.510748
ENSMUSG00000038943	Prc1	233406	358.806	-0.338403	0.110344	-3.06681	0.00216355	0.510748
ENSMUSG00000056071	S100a9	20202	62.2454	1.53252	0.500331	3.06302	0.00219115	0.510748
ENSMUSG00000074268	Amy2a5	109959	7.26894	0.966005	0.316147	3.05556	0.0022464	0.510748
ENSMUSG00000097863	1010001B22Rik	75403	12.7737	0.710302	0.232562	3.05425	0.00225624	0.510748
ENSMUSG00000091443	Gm17023	108167522	58.7593	-0.278838	0.0913871	-3.05118	0.00227944	0.511871
ENSMUSG00000030344	Akap3	11642	10.2341	-0.797012	0.261537	-3.04742	0.00230819	0.514213
ENSMUSG00000096001	2610528A11Rik	70045	11.6443	0.779174	0.255887	3.04499	0.00232685	0.514289
ENSMUSG00000029658	Wdr95	381693	44.6873	-0.330891	0.108902	-3.03844	0.00237809	0.517739
ENSMUSG00000037974	Muc5ac	17833	1.51637	1.87443	0.616938	3.03828	0.00237935	0.517739
ENSMUSG00000001700	Gramd3	107022	577.65	-0.187867	0.0626151	-3.00034	0.00269679	0.525688
ENSMUSG00000005360	Slc1a3	20512	17965.2	-0.145681	0.0484838	-3.00474	0.00265812	0.525688
ENSMUSG00000020932	Gfap	14580	18197.9	0.538157	0.178876	3.00856	0.00262492	0.525688
ENSMUSG00000021091	Serpina3n	20716	1353.06	0.546013	0.180975	3.01707	0.00255234	0.525688
ENSMUSG00000027115	Kif18a	228421	60.3071	-0.340521	0.112626	-3.02346	0.00249902	0.525688
ENSMUSG00000028859	Csf3r	12986	424.479	0.312087	0.103538	3.01424	0.00257627	0.525688
ENSMUSG00000031297	Slc7a3	11989	513.368	0.284506	0.094238	3.01902	0.00253594	0.525688
ENSMUSG00000031662	Snx20	71607	49.5975	0.381978	0.126106	3.02903	0.00245341	0.525688
ENSMUSG00000036249	Rbm43	71684	713.398	0.180675	0.060059	3.00829	0.00262724	0.525688
ENSMUSG00000039830	Olig2	50913	952.624	-0.218623	0.0721977	-3.02811	0.00246089	0.525688
ENSMUSG00000053110	Yap1	22601	1018.62	-0.140669	0.0468843	-3.00034	0.00269675	0.525688
ENSMUSG00000055172	C1ra	50909	112.849	0.506257	0.168286	3.00832	0.002627	0.525688
ENSMUSG00000074981	Dcdc5	329482	23.7288	-0.636546	0.211306	-3.01243	0.00259164	0.525688
ENSMUSG00000030708	Dnajb13	69387	27.6636	-0.503391	0.168312	-2.99083	0.00278223	0.533237
ENSMUSG00000040424	Hipk4	233020	3372.13	-0.212316	0.0709474	-2.99259	0.00276622	0.533237
ENSMUSG00000051497	Kcnj16	16517	942.023	-0.195117	0.0652631	-2.9897	0.00279251	0.533237
ENSMUSG00000017466	Timp2	21858	14376.9	0.200848	0.0673251	2.98325	0.00285201	0.537289
ENSMUSG00000071713	Csf2rb	12983	85.5545	0.491434	0.164641	2.98488	0.00283692	0.537289
ENSMUSG00000000202	Btbd17	72014	672.919	-0.252888	0.0848461	-2.98055	0.00287731	0.537989
ENSMUSG00000031360	Ctps2	55936	1928.33	0.113615	0.0381416	2.97877	0.00289407	0.537989
ENSMUSG00000037446	Tulp1	22157	5.11779	-1.55933	0.524117	-2.97516	0.00292836	0.540784
ENSMUSG00000024140	Epas1	13819	4486.92	-0.165911	0.0561033	-2.95723	0.00310414	0.542951
ENSMUSG00000024526	Cidea	12683	130.745	0.267733	0.0909391	2.94409	0.00323904	0.542951
ENSMUSG00000027381	Bcl2l11	12125	286.194	0.198211	0.0667994	2.96726	0.00300469	0.542951
ENSMUSG00000031938	4931406C07Rik	70984	1036.06	-0.12576	0.0425172	-2.95785	0.00309791	0.542951
ENSMUSG00000032595	Cdhr4	69398	24.9881	-0.561412	0.190752	-2.94315	0.00324888	0.542951
ENSMUSG00000032737	Inppl1	16332	1483.23	-0.138723	0.0471351	-2.94309	0.00324958	0.542951
ENSMUSG00000037754	Ppp1r16b	228852	6104.78	-0.144949	0.049152	-2.949	0.00318802	0.542951
ENSMUSG00000043051	Disc1	244667	89.8805	-0.260351	0.0879211	-2.96118	0.0030646	0.542951
ENSMUSG00000043366	Olfr78	170639	47.627	-0.503029	0.170668	-2.94742	0.00320441	0.542951
ENSMUSG00000047067	Dusp28	67446	675.728	0.176839	0.0599801	2.94829	0.00319532	0.542951
ENSMUSG00000060508	Nlrp9b	243874	1.13252	2.24345	0.761081	2.94771	0.00320136	0.542951
ENSMUSG00000066705	Fxyd6	59095	4707.78	0.232461	0.0788967	2.9464	0.00321496	0.542951
ENSMUSG00000091002	Tcerg1l	70571	476.91	0.198104	0.0667008	2.97004	0.00297762	0.542951
ENSMUSG00000023978	Prph2	19133	3.90445	-1.05428	0.358827	-2.93813	0.003302	0.545438
ENSMUSG00000031134	Rbmx	19655	2363.13	-0.10174	0.0346505	-2.93618	0.00332276	0.545438
ENSMUSG00000040809	Chil3	12655	9.55638	1.4761	0.502555	2.93719	0.00331197	0.545438
ENSMUSG00000087672	Gm15122	103232	114.391	-0.29334	0.100047	-2.93203	0.00336756	0.549577
ENSMUSG00000002043	Trappc6a	67091	292.568	0.409619	0.141022	2.90463	0.00367682	0.551884
ENSMUSG00000005089	Slc1a2	20511	108257	-0.180191	0.0617688	-2.91718	0.00353209	0.551884
ENSMUSG00000006649	Nphs1	54631	58.1004	-0.36946	0.127344	-2.90126	0.00371662	0.551884
ENSMUSG00000020864	Ankrd40	71452	5329.57	-0.0914351	0.0315234	-2.90055	0.00372513	0.551884
ENSMUSG00000020904	Cfap52	71860	39.5863	-0.446857	0.154106	-2.89967	0.00373559	0.551884
ENSMUSG00000033577	Myo6	17920	5347.81	-0.130774	0.0449982	-2.90621	0.00365839	0.551884
ENSMUSG00000037016	Frem2	242022	153.765	-0.308011	0.106106	-2.90285	0.00369783	0.551884
ENSMUSG00000037493	Cib2	56506	787.728	0.178088	0.0610023	2.91936	0.00350752	0.551884
ENSMUSG00000039037	St6galnac5	26938	3046.53	-0.10451	0.0358131	-2.91821	0.00352052	0.551884
ENSMUSG00000042622	Maff	17133	75.1615	0.504985	0.173929	2.90339	0.00369142	0.551884
ENSMUSG00000046585	Cfap58	381229	17.9261	-0.51224	0.175673	-2.91587	0.00354696	0.551884
ENSMUSG00000063065	Mapk3	26417	5850.91	0.203625	0.0696532	2.92341	0.00346217	0.551884
ENSMUSG00000085938	Gm14371	620189	1.74408	-1.7167	0.588694	-2.91612	0.00354415	0.551884
ENSMUSG00000093930	Hmgcs1	208715	11513.7	0.223706	0.0769613	2.90673	0.00365226	0.551884
ENSMUSG00000086290	Snhg12	100039864	597.378	0.20976	0.0723965	2.89738	0.00376297	0.553018
ENSMUSG00000019189	Rnf145	74315	3988.8	-0.110998	0.0383944	-2.89099	0.00384035	0.55973
ENSMUSG00000022314	Rad21	19357	5250.99	0.128965	0.0446196	2.89032	0.00384852	0.55973
ENSMUSG00000018819	Lsp1	16985	268.523	0.294756	0.102235	2.88313	0.00393748	0.569717
ENSMUSG00000022449	Adamts20	223838	704.003	-0.170206	0.0591456	-2.87774	0.00400529	0.570704
ENSMUSG00000033059	Pygb	110078	8675.24	0.119194	0.0414121	2.87823	0.00399915	0.570704
ENSMUSG00000056966	Gjc3	118446	2187.47	-0.247153	0.0858228	-2.87981	0.0039792	0.570704
ENSMUSG00000030495	Slc7a10	53896	849.074	-0.195471	0.0679829	-2.87529	0.00403655	0.572252
ENSMUSG00000010064	Slc38a3	76257	2818.34	-0.193076	0.0673477	-2.86685	0.00414586	0.584795
ENSMUSG00000026582	Sele	20339	2.15928	2.54228	0.887749	2.86374	0.00418671	0.587605
ENSMUSG00000030942	Thumpd1	233802	1896.48	0.1415	0.0495233	2.85724	0.00427346	0.596765
ENSMUSG00000074283	Zfp109	56869	179.931	-0.30808	0.107966	-2.8535	0.00432412	0.596765
ENSMUSG00000015942	Gtf2ird2	114674	820.268	0.110993	0.038983	2.84721	0.00441049	0.59808
ENSMUSG00000023027	Atf1	11908	535.368	-0.116613	0.0409553	-2.84733	0.00440883	0.59808
ENSMUSG00000073682	Gm10563	100038426	10.0084	-0.693776	0.243502	-2.84915	0.00438358	0.59808
ENSMUSG00000090063	Dlx6os1	320038	812.693	-0.336133	0.118202	-2.84373	0.00445886	0.601732
ENSMUSG00000074358	Ccdc61	232933	278.994	-0.358059	0.126094	-2.83962	0.00451666	0.603727
ENSMUSG00000018415	Gid4	66771	2781.92	-0.104469	0.0368937	-2.83162	0.00463127	0.610327
ENSMUSG00000019923	Zwint	52696	37919.6	0.170717	0.0602455	2.83368	0.00460149	0.610327
ENSMUSG00000074277	Phldb3	232970	5.75582	0.905247	0.319578	2.83263	0.00461669	0.610327
ENSMUSG00000034209	Rasl10a	75668	939.866	0.297876	0.105337	2.82785	0.00468615	0.614674
ENSMUSG00000053475	Tnfaip6	21930	343.159	-0.302025	0.106864	-2.82625	0.00470969	0.614888
ENSMUSG00000054320	Lrrc36	270091	42.998	-0.469599	0.166319	-2.82349	0.00475045	0.617339
ENSMUSG00000024900	Cpt1a	12894	986.765	-0.171716	0.0609185	-2.81878	0.00482068	0.621426
ENSMUSG00000031639	Tlr3	142980	545.184	-0.221588	0.0786215	-2.81841	0.00482618	0.621426
ENSMUSG00000046805	Mpeg1	17476	1487.98	0.391967	0.139548	2.80884	0.00497204	0.634387
ENSMUSG00000027803	Wwtr1	97064	582.348	-0.192863	0.0688426	-2.8015	0.00508657	0.643153
ENSMUSG00000048583	Igf2	16002	2714.2	-0.442283	0.15784	-2.8021	0.00507716	0.643153
ENSMUSG00000012396	Nanog	71950	4.77119	-0.924991	0.330349	-2.80004	0.00510965	0.643174
ENSMUSG00000045655	Fam216b	219170	34.7275	-0.713242	0.254892	-2.79821	0.00513873	0.643947
ENSMUSG00000046387	Pcdhb17	93888	605.672	-0.202157	0.0724864	-2.78889	0.00528885	0.659813
ENSMUSG00000029695	Aass	30956	203.306	-0.245482	0.0882967	-2.7802	0.00543257	0.661079
ENSMUSG00000030917	Tmem159	233806	322.139	0.376553	0.135309	2.7829	0.00538749	0.661079
ENSMUSG00000045662	Henmt1	66715	32.4055	0.565168	0.203271	2.78037	0.00542971	0.661079
ENSMUSG00000052684	Jun	16476	1826.65	0.177223	0.0637479	2.78006	0.00543481	0.661079
ENSMUSG00000055882	Abhd16b	241850	2.3101	1.34733	0.483988	2.78381	0.00537237	0.661079
ENSMUSG00000097387	4930563E18Rik	75370	4.63466	-0.915835	0.32963	-2.77838	0.00546313	0.661079
ENSMUSG00000030380	Mzf1	109889	615.17	-0.146892	0.0530038	-2.77134	0.0055826	0.664166
ENSMUSG00000032246	Calml4	75600	60.5604	-0.563194	0.203028	-2.77397	0.00553774	0.664166
ENSMUSG00000097797	Gm26901	102632124	85.1237	-0.280969	0.101382	-2.77138	0.005582	0.664166
ENSMUSG00000038642	Ctss	13040	2766.14	0.271401	0.0981036	2.76648	0.00566654	0.666618
ENSMUSG00000052253	Zfp622	52521	1480.83	0.151605	0.0548115	2.76594	0.00567587	0.666618
ENSMUSG00000031428	Zcchc18	66995	12581.8	0.121865	0.0440851	2.7643	0.00570448	0.667187
ENSMUSG00000037820	Tgm2	21817	351.095	0.397345	0.144003	2.75927	0.00579298	0.671098
ENSMUSG00000038521	C1s1	50908	45.1512	0.532624	0.193096	2.75834	0.00580964	0.671098
ENSMUSG00000024593	Megf10	70417	1279.31	-0.152866	0.0554471	-2.75696	0.00583416	0.671167
ENSMUSG00000010154	Spire2	234857	794.304	0.189962	0.0689847	2.75368	0.00589289	0.671919
ENSMUSG00000024424	Ttc39c	72747	1002.08	0.12358	0.0448544	2.75514	0.00586676	0.671919
ENSMUSG00000081429	Rps27-ps1	100462728	2.3619	1.33947	0.48662	2.75259	0.0059125	0.671919
ENSMUSG00000020953	Coch	12810	1201.64	-0.224888	0.0818408	-2.74787	0.00599834	0.673835
ENSMUSG00000026126	Ptpn18	19253	35.7544	0.406891	0.148226	2.74507	0.00604979	0.673835
ENSMUSG00000028238	Atp6v0d2	242341	6.00372	2.20589	0.803958	2.74379	0.0060734	0.673835
ENSMUSG00000029186	Pi4k2b	67073	104.354	-0.287072	0.104524	-2.74648	0.00602384	0.673835
ENSMUSG00000047591	Mafa	378435	21.7708	-0.463133	0.168546	-2.74782	0.00599935	0.673835
ENSMUSG00000062524	Ncr1	17086	2.21715	1.3032	0.474743	2.74507	0.00604978	0.673835
ENSMUSG00000022758	P2rx6	18440	271.602	0.167953	0.0614923	2.73128	0.00630882	0.676609
ENSMUSG00000027562	Car2	12349	6346.29	-0.235027	0.0857459	-2.74097	0.00612575	0.676609
ENSMUSG00000029155	Spata18	73472	21.1322	-0.825442	0.301715	-2.73584	0.00622221	0.676609
ENSMUSG00000029761	Cald1	109624	1153.4	-0.20666	0.0754955	-2.73738	0.00619311	0.676609
ENSMUSG00000030789	Itgax	16411	154.676	0.786989	0.287886	2.73369	0.00626297	0.676609
ENSMUSG00000038932	Tcfl5	277353	24.5584	-0.516965	0.189368	-2.72995	0.00633431	0.676609
ENSMUSG00000045659	Plekha7	233765	1700.99	-0.168927	0.061858	-2.73088	0.00631659	0.676609
ENSMUSG00000061068	Mcpt4	17227	0.745127	-2.98911	1.09554	-2.72844	0.00636355	0.676609
ENSMUSG00000083822	Hmgb1-ps5	100043312	12.8615	0.495034	0.181432	2.72849	0.00636259	0.676609
ENSMUSG00000084370	Gm15442	100041691	81.7996	0.549327	0.201124	2.73128	0.00630882	0.676609
ENSMUSG00000085167	Gm12063	100042256	62.9328	-0.268079	0.0983027	-2.72708	0.00638975	0.676831
ENSMUSG00000037318	Traf3ip3	215243	45.4995	0.360661	0.132346	2.72515	0.00642729	0.678248
ENSMUSG00000037278	Tmem97	69071	526.661	0.194678	0.0714773	2.72364	0.00645676	0.678806
ENSMUSG00000084050	Gm14439	108168824	9.95484	0.580673	0.213386	2.72123	0.00650385	0.681206
ENSMUSG00000104190	Gm10472	100038444	18.7162	-0.477397	0.175525	-2.71982	0.00653182	0.681592
ENSMUSG00000029771	Irf5	27056	179.213	0.23712	0.0873321	2.71515	0.00662453	0.688705
ENSMUSG00000022711	Pmm2	54128	892.652	-0.110487	0.0407231	-2.71313	0.00666511	0.690367
ENSMUSG00000021506	Pitx1	18740	7.13178	0.742708	0.27395	2.71111	0.0067059	0.692039
ENSMUSG00000026672	Optn	71648	915.838	0.110593	0.0408499	2.70731	0.00678305	0.692365
ENSMUSG00000029123	Stk32b	64293	197.251	0.267721	0.0988491	2.70838	0.00676125	0.692365
ENSMUSG00000074250	Gm10653	677044	8.23339	-0.68636	0.253436	-2.70822	0.00676446	0.692365
ENSMUSG00000031147	Magix	54634	22.1237	-0.442898	0.163851	-2.70305	0.00687067	0.69374
ENSMUSG00000075602	Ly6a	110454	391.088	0.70915	0.262345	2.70312	0.00686911	0.69374
ENSMUSG00000093651	Gm5873	545826	10.6382	0.575386	0.212812	2.70373	0.00685668	0.69374
ENSMUSG00000025759	Mfsd8	72175	660.517	-0.167914	0.0621587	-2.70138	0.00690533	0.69474
ENSMUSG00000020227	Irak3	73914	57.3714	0.348505	0.129174	2.69796	0.00697659	0.699403
ENSMUSG00000041044	Lrit1	239037	0.959081	-2.53902	0.941992	-2.69538	0.00703086	0.702336
ENSMUSG00000000682	Cd52	23833	100.454	0.545475	0.202981	2.68733	0.00720268	0.709401
ENSMUSG00000029575	Mmab	77697	1252.13	0.12941	0.04814	2.68821	0.00718369	0.709401
ENSMUSG00000054910	4931415C17Rik	70966	84.1756	-0.243406	0.0905615	-2.68774	0.00719363	0.709401
ENSMUSG00000098771	Mir6538	102466676	1.31509	-1.46414	0.544552	-2.68871	0.00717296	0.709401
ENSMUSG00000059049	Frem1	329872	233.579	-0.198334	0.0738581	-2.68534	0.00724555	0.711128
ENSMUSG00000037686	Aspg	104816	338.4	0.442212	0.164912	2.68151	0.00732902	0.716814
ENSMUSG00000020363	Gfpt2	14584	330.832	-0.225685	0.0842379	-2.67914	0.00738106	0.716908
ENSMUSG00000028635	Edn2	13615	2.75429	-1.1946	0.445874	-2.67924	0.00737898	0.716908
ENSMUSG00000038290	Smg6	103677	2262.19	0.0990721	0.0370268	2.67569	0.00745763	0.721847
ENSMUSG00000098383	Gm27197	102639358	21.0566	-0.427044	0.159677	-2.67442	0.00748588	0.722091
ENSMUSG00000020268	Lyrm7	75530	326.532	-0.496691	0.186101	-2.66893	0.00760938	0.728995
ENSMUSG00000066441	Rdh11	17252	1159.82	0.154799	0.0581276	2.66309	0.00774256	0.738376
ENSMUSG00000001076	C1ql4	239659	19.4564	0.846828	0.318759	2.65664	0.00789228	0.744617
ENSMUSG00000031927	1700012B09Rik	69325	21.3505	-0.619133	0.233099	-2.6561	0.00790509	0.744617
ENSMUSG00000072944	Nup62cl	279706	11.0185	-0.632952	0.238188	-2.65736	0.00787543	0.744617
ENSMUSG00000013338	Fer1l4	74562	3.29707	-1.0409	0.392128	-2.6545	0.00794259	0.745647
ENSMUSG00000086447	Gm13522	108168754	0.890967	2.10511	0.793904	2.65159	0.00801126	0.749587
ENSMUSG00000021703	Serinc5	218442	3424.91	-0.140393	0.052987	-2.64958	0.00805931	0.750905
ENSMUSG00000022425	Enpp2	18606	10344.5	-0.367532	0.138775	-2.6484	0.00808743	0.750905
ENSMUSG00000033538	Casp4	12363	19.9381	0.652704	0.246523	2.64764	0.0081056	0.750905
ENSMUSG00000047230	Cldn2	12738	49.7453	-0.721297	0.27263	-2.6457	0.00815229	0.752746
ENSMUSG00000020155	Kcnmb1	16533	36.3609	-0.463173	0.175609	-2.63752	0.00835144	0.766095
ENSMUSG00000095841	Gm8532	667238	1.72524	1.48545	0.563946	2.63403	0.0084379	0.771504
ENSMUSG00000015749	Anp32e	66471	4317.29	-0.127285	0.0483462	-2.63279	0.00846863	0.7718
ENSMUSG00000002012	Pnck	93843	3496.85	0.189894	0.0723349	2.62521	0.00865954	0.775613
ENSMUSG00000019853	Hebp2	56016	125.901	0.244029	0.0929617	2.62505	0.00866355	0.775613
ENSMUSG00000027293	Ehd4	98878	726.994	0.158091	0.0602588	2.62354	0.00870203	0.775613
ENSMUSG00000027709	Mccc1	72039	880.017	-0.170451	0.0649342	-2.62498	0.00866549	0.775613
ENSMUSG00000027713	1810062G17Rik	72282	3.85659	-0.994142	0.378127	-2.62912	0.00856061	0.775613
ENSMUSG00000030235	Slco1c1	58807	1432.77	-0.275095	0.104859	-2.62347	0.00870389	0.775613
ENSMUSG00000040250	Ints13	71177	1086.64	-0.124285	0.047313	-2.62686	0.00861757	0.775613
ENSMUSG00000085389	1700003M07Rik	72225	219.822	-0.156681	0.0597616	-2.62177	0.00874738	0.777022
ENSMUSG00000096544	Gm4617	100043740	10.7873	-0.58914	0.225206	-2.616	0.00889659	0.783823
ENSMUSG00000085713	Gm15736	102637521	1.5453	1.68102	0.643598	2.61191	0.00900367	0.78733
ENSMUSG00000030994	D7Ertd443e	71007	150.168	-0.248868	0.0953276	-2.61066	0.00903678	0.787771
ENSMUSG00000051041	Olfml1	244198	472.4	-0.322882	0.123737	-2.60942	0.0090696	0.788185
ENSMUSG00000012705	Retn	57264	30.7529	0.431818	0.165557	2.60828	0.00909993	0.788379
ENSMUSG00000050122	Vwa3b	70853	70.9699	-0.293596	0.112663	-2.60598	0.00916125	0.79125
ENSMUSG00000000204	Slfn4	20558	6.98911	1.41585	0.545475	2.59563	0.00944185	0.798285
ENSMUSG00000001783	Rtcb	28088	3793.7	0.106413	0.0417543	2.54856	0.0108168	0.798285
ENSMUSG00000002459	Rgs20	58175	1082.02	-0.164429	0.0643677	-2.55452	0.0106333	0.798285
ENSMUSG00000003227	Edar	13608	10.9001	-0.494923	0.191493	-2.58454	0.00975079	0.798285
ENSMUSG00000003348	Mob3a	208228	107.914	0.215691	0.0839061	2.57062	0.0101515	0.798285
ENSMUSG00000009092	Derl3	70377	66.1544	-0.283468	0.108957	-2.60165	0.00927761	0.798285
ENSMUSG00000020521	Rnft1	76892	837.143	-0.149157	0.0582481	-2.56072	0.0104454	0.798285
ENSMUSG00000020532	Acaca	107476	4122.65	0.128003	0.0500728	2.55633	0.0105781	0.798285
ENSMUSG00000020593	Lpin1	14245	1540.57	0.135643	0.0524798	2.58468	0.00974707	0.798285
ENSMUSG00000022358	Fbxo32	67731	1236.71	-0.191162	0.0738809	-2.58743	0.00966943	0.798285
ENSMUSG00000022753	Tmem30c	71027	43.3066	0.479545	0.18663	2.56949	0.0101849	0.798285
ENSMUSG00000024331	Dsc2	13506	45.865	0.347004	0.13583	2.55469	0.0106283	0.798285
ENSMUSG00000024899	Papss2	23972	617.242	-0.169498	0.0658599	-2.57361	0.0100643	0.798285
ENSMUSG00000026301	Iqca	74918	35.8421	-0.44891	0.176159	-2.54832	0.0108243	0.798285
ENSMUSG00000026430	Rassf5	54354	1124.45	0.147023	0.056757	2.59039	0.00958664	0.798285
ENSMUSG00000026988	Wdsub1	72137	439.74	0.0908676	0.0354512	2.56317	0.0103721	0.798285
ENSMUSG00000027199	Gatm	67092	4487.83	-0.157199	0.0613284	-2.56324	0.0103701	0.798285
ENSMUSG00000027253	Lrp4	228357	1733.73	-0.159368	0.0618816	-2.57537	0.0100133	0.798285
ENSMUSG00000027276	Jag1	16449	309.049	-0.223737	0.0876074	-2.55386	0.0106535	0.798285
ENSMUSG00000027397	Slc20a1	20515	5507.19	0.0732006	0.0286518	2.55484	0.0106238	0.798285
ENSMUSG00000028165	Cisd2	67006	2391.22	-0.0705957	0.0275069	-2.56647	0.0102739	0.798285
ENSMUSG00000028803	Nipal3	74552	5139.35	0.128572	0.050047	2.56903	0.0101985	0.798285
ENSMUSG00000028955	Vamp3	22319	1318.51	-0.101024	0.0393654	-2.56631	0.0102786	0.798285
ENSMUSG00000030424	Zfp939	233147	302.109	-0.198827	0.077814	-2.55516	0.010614	0.798285
ENSMUSG00000033715	Akr1c14	105387	40.9068	-0.415594	0.162229	-2.56177	0.0104141	0.798285
ENSMUSG00000034098	Fstl5	213262	1078.67	0.268817	0.104466	2.57325	0.0100749	0.798285
ENSMUSG00000035403	Crb2	241324	269.095	-0.184764	0.0715687	-2.58164	0.00983326	0.798285
ENSMUSG00000036975	Tmem177	66343	375.8	0.123791	0.0480206	2.57788	0.00994078	0.798285
ENSMUSG00000039155	Cdh26	381409	15.4828	-0.63643	0.247869	-2.56761	0.0102404	0.798285
ENSMUSG00000040564	Apoc1	11812	64.3932	0.558919	0.217999	2.56386	0.0103516	0.798285
ENSMUSG00000040918	Slc19a2	116914	792.748	0.121166	0.0473845	2.55708	0.0105555	0.798285
ENSMUSG00000042489	Clspn	269582	72.542	-0.45257	0.177569	-2.5487	0.0108124	0.798285
ENSMUSG00000042761	Mrap2	244958	471.404	0.270476	0.105157	2.57212	0.0101077	0.798285
ENSMUSG00000048108	Tmem72	319776	53.1309	-0.821731	0.316087	-2.5997	0.00933052	0.798285
ENSMUSG00000052212	Cd177	68891	4.28655	1.72943	0.673238	2.56882	0.0102045	0.798285
ENSMUSG00000054408	Spcs3	76687	3891.56	-0.132849	0.0518813	-2.56064	0.0104479	0.798285
ENSMUSG00000054889	Dsp	109620	248.306	-0.581879	0.228218	-2.54966	0.0107828	0.798285
ENSMUSG00000055972	2810407A14Rik	100039901	30.5922	-0.440534	0.171273	-2.57211	0.0101081	0.798285
ENSMUSG00000059430	Actg2	11468	4.93495	-0.835358	0.32605	-2.56206	0.0104053	0.798285
ENSMUSG00000060063	Alox5ap	11690	123.203	0.264277	0.103712	2.54819	0.0108283	0.798285
ENSMUSG00000062585	Cnr2	12802	17.0815	0.55556	0.216834	2.56214	0.0104028	0.798285
ENSMUSG00000063821	Dupd1	435391	3.41583	-0.975006	0.381449	-2.55605	0.0105866	0.798285
ENSMUSG00000068323	Slc4a5	232156	67.4777	-0.784901	0.306662	-2.5595	0.0104824	0.798285
ENSMUSG00000070366	Plpp4	381925	180.06	0.256595	0.0999628	2.5669	0.0102611	0.798285
ENSMUSG00000074465	Gm10701	100038418	11.0132	-0.558591	0.216103	-2.58483	0.00974259	0.798285
ENSMUSG00000078865	Gm14406	100504328	11.3648	0.622312	0.243909	2.55141	0.0107287	0.798285
ENSMUSG00000078905	Gm14393	664987	19.2406	-0.432982	0.169093	-2.56062	0.0104485	0.798285
ENSMUSG00000089669	Tnfsf13	69583	29.6602	-0.372215	0.14461	-2.57393	0.0100551	0.798285
ENSMUSG00000089762	Ier5l	72500	552.688	0.252995	0.0973973	2.59756	0.00938892	0.798285
ENSMUSG00000096943	Gm26721	105243235	101.063	-0.325123	0.127601	-2.54797	0.0108353	0.798285
ENSMUSG00000097123	Gm6297	622208	80.4927	-0.232931	0.0902656	-2.58051	0.00986546	0.798285
ENSMUSG00000097603	A430010J10Rik	319665	14.9073	0.463216	0.180967	2.55967	0.0104772	0.798285
ENSMUSG00000001520	Nrip2	60345	1026.39	0.168979	0.0664927	2.54132	0.0110434	0.800254
ENSMUSG00000002475	Abhd3	106861	1944.26	-0.146402	0.057764	-2.53449	0.0112611	0.800254
ENSMUSG00000003974	Grm3	108069	1906.66	-0.207897	0.0818424	-2.54021	0.0110787	0.800254
ENSMUSG00000025991	Cps1	227231	19.9041	-0.555712	0.21915	-2.53576	0.0112203	0.800254
ENSMUSG00000047181	Samd14	217125	2207.73	0.208652	0.0819666	2.54557	0.0109098	0.800254
ENSMUSG00000073998	Olfr520	259066	1.54295	-2.04123	0.80202	-2.54511	0.0109243	0.800254
ENSMUSG00000082860	Gm13204	100043151	95.5774	-0.254515	0.10029	-2.53779	0.0111556	0.800254
ENSMUSG00000085622	3110056K07Rik	73204	315.124	-0.176675	0.0696639	-2.5361	0.0112094	0.800254
ENSMUSG00000086732	Gm6117	105242621	12.8325	-0.527088	0.207659	-2.53823	0.0111413	0.800254
ENSMUSG00000091387	Gcnt4	218476	542.67	-0.208863	0.0821483	-2.54251	0.011006	0.800254
ENSMUSG00000097156	Gm3764	100042277	5056.21	-0.207628	0.081864	-2.53625	0.0112046	0.800254
ENSMUSG00000097277	2900076A07Rik	100504421	228.854	-0.161807	0.0638373	-2.53468	0.011255	0.800254
ENSMUSG00000097720	Gm26849	105243448	1.85709	-1.46277	0.576323	-2.53811	0.0111453	0.800254
ENSMUSG00000103293	Gm5842	545506	18.2722	0.412865	0.162787	2.53622	0.0112056	0.800254
ENSMUSG00000010538	Tsacc	76927	36.5046	-0.323819	0.127985	-2.53014	0.0114018	0.801354
ENSMUSG00000019301	Hsd17b1	15485	14.0277	-0.475845	0.187985	-2.53129	0.0113643	0.801354
ENSMUSG00000020170	Frs2	327826	2505.3	0.13437	0.0531037	2.53034	0.0113953	0.801354
ENSMUSG00000039391	Ccdc81	70884	82.8969	-0.326207	0.129015	-2.52845	0.0114568	0.801354
ENSMUSG00000062078	Qk	19317	13406.4	-0.170807	0.0675686	-2.5279	0.0114748	0.801354
ENSMUSG00000082475	Gm7206	101056029	3.73803	0.963642	0.381256	2.52754	0.0114864	0.801354
ENSMUSG00000087150	BC064078	408064	45.7639	-0.310449	0.122571	-2.53281	0.0113153	0.801354
ENSMUSG00000074968	Ano3	228432	4114.15	-0.378247	0.149779	-2.52536	0.0115579	0.802968
ENSMUSG00000006389	Mpl	17480	17.6632	-0.440333	0.174502	-2.52338	0.0116234	0.803619
ENSMUSG00000007457	2310003L06Rik	74248	0.669008	2.73672	1.08659	2.51862	0.0117815	0.804637
ENSMUSG00000028415	Spink4	20731	3.75425	-0.896963	0.356101	-2.51885	0.0117739	0.804637
ENSMUSG00000029866	Kel	23925	1.45707	-1.88289	0.747408	-2.51923	0.0117613	0.804637
ENSMUSG00000039231	Suv39h1	20937	826.989	0.119647	0.0474432	2.5219	0.0116722	0.804637
ENSMUSG00000086600	C030005K06Rik	102635912	26.6365	-0.850429	0.337881	-2.51695	0.0118376	0.806508
ENSMUSG00000000732	Icosl	50723	247.121	0.265468	0.106043	2.5034	0.0123005	0.808812
ENSMUSG00000002957	Ap2a2	11772	8724.18	0.124403	0.0496953	2.50331	0.0123036	0.808812
ENSMUSG00000024497	Pou4f3	18998	2.75378	1.50004	0.599189	2.50346	0.0122986	0.808812
ENSMUSG00000025742	Prps2	110639	1417.93	-0.110657	0.0441033	-2.50905	0.0121057	0.808812
ENSMUSG00000025776	Crispld1	83691	215.231	-0.23467	0.0934798	-2.51038	0.0120601	0.808812
ENSMUSG00000027852	Nras	18176	1859.68	-0.0898457	0.0358522	-2.50601	0.0122104	0.808812
ENSMUSG00000031681	Smad1	17125	1038.73	0.0975148	0.0388176	2.51213	0.0120006	0.808812
ENSMUSG00000034957	Cebpa	12606	413.079	0.218868	0.0873858	2.50461	0.0122585	0.808812
ENSMUSG00000037466	Tedc1	104732	76.429	0.226699	0.0903402	2.50939	0.0120939	0.808812
ENSMUSG00000050555	Hyls1	76832	290.277	0.12729	0.0507995	2.50574	0.0122196	0.808812
ENSMUSG00000058488	Kl	16591	401.651	-0.577483	0.230459	-2.5058	0.0122175	0.808812
ENSMUSG00000074758	Gm5535	433481	29.8312	-0.432593	0.172756	-2.50407	0.0122773	0.808812
ENSMUSG00000097842	9330104G04Rik	320950	158.676	-0.626855	0.249749	-2.50994	0.0120753	0.808812
ENSMUSG00000023050	Map3k12	26404	3883.33	0.105978	0.0423509	2.50238	0.0123362	0.809059
ENSMUSG00000026697	Myoc	17926	356.375	-1.07858	0.431335	-2.50057	0.0123993	0.810203
ENSMUSG00000097973	Gm4929	238091	1.31312	1.82304	0.729798	2.49801	0.0124892	0.811507
ENSMUSG00000026003	Acadl	11363	1208.91	-0.136485	0.0546732	-2.49638	0.0125468	0.813371
ENSMUSG00000081738	Hmgb1-ps2	100135427	150.076	0.211075	0.0846746	2.49277	0.0126749	0.819781
ENSMUSG00000027792	Bche	12038	249.722	-0.442505	0.177692	-2.49029	0.012764	0.823646
ENSMUSG00000030114	Klrg1	50928	7.02273	0.667896	0.268488	2.48762	0.0128602	0.824265
ENSMUSG00000047996	Prrg1	546336	369.06	-0.281867	0.113457	-2.48434	0.0129792	0.824265
ENSMUSG00000062480	Acat3	224530	634.305	0.192797	0.0775394	2.48644	0.0129029	0.824265
ENSMUSG00000084592	Mir1898	100316684	27.2358	-0.358507	0.144303	-2.48441	0.0129768	0.824265
ENSMUSG00000096936	Gm3510	100041781	216.839	-0.23047	0.0927622	-2.48453	0.0129723	0.824265
ENSMUSG00000030579	Tyrobp	22177	819.29	0.337046	0.13572	2.48339	0.0130139	0.824591
ENSMUSG00000031893	Tsnaxip1	72236	44.1819	-0.313085	0.126153	-2.48179	0.0130724	0.824591
ENSMUSG00000097493	9930014A18Rik	320469	71.895	-0.267098	0.107594	-2.48245	0.0130481	0.824591
ENSMUSG00000020471	Pold2	18972	445.17	0.176784	0.0713876	2.4764	0.0132714	0.826062
ENSMUSG00000030047	Arhgap25	232201	282.248	0.231682	0.0936031	2.47515	0.013318	0.826062
ENSMUSG00000045790	Ccdc149	100503884	2515.62	0.106712	0.0430522	2.47866	0.0131876	0.826062
ENSMUSG00000049281	Scn3b	235281	5561.16	-0.0883669	0.0356785	-2.47676	0.0132583	0.826062
ENSMUSG00000050854	Tmem125	230678	334.056	-0.239823	0.0967346	-2.47919	0.0131682	0.826062
ENSMUSG00000076441	Ass1	11898	1135.09	0.168881	0.0682405	2.4748	0.0133312	0.826062
ENSMUSG00000079014	Serpina3i	628900	3.29137	1.42255	0.57412	2.47779	0.0132197	0.826062
ENSMUSG00000026249	Serpine2	20720	6183.16	-0.125375	0.050691	-2.47331	0.0133867	0.827676
ENSMUSG00000030654	Arl6ip1	54208	10510.2	0.13184	0.0533559	2.47096	0.0134752	0.82768
ENSMUSG00000071714	Csf2rb2	12984	114.986	0.299127	0.121024	2.47162	0.0134501	0.82768
ENSMUSG00000097692	A230060F14Rik	791330	14.0275	-0.450609	0.182257	-2.47238	0.0134216	0.82768
ENSMUSG00000025480	Syce1	74075	13.4256	0.568675	0.230359	2.46864	0.0135626	0.829417
ENSMUSG00000078307	AI593442	330941	7857.66	-0.149872	0.0607064	-2.4688	0.0135568	0.829417
ENSMUSG00000048163	Selplg	20345	839.912	0.219073	0.0887726	2.4678	0.0135948	0.829579
ENSMUSG00000015396	Cd83	12522	935.009	0.244466	0.09947	2.45769	0.0139835	0.829678
ENSMUSG00000022831	Hcls1	15163	206.578	0.231904	0.0943517	2.45786	0.0139766	0.829678
ENSMUSG00000023959	Clic5	224796	262.781	-0.297213	0.121077	-2.45474	0.0140988	0.829678
ENSMUSG00000024597	Slc12a2	20496	3729.09	-0.176414	0.0715999	-2.46388	0.0137441	0.829678
ENSMUSG00000028669	Pithd1	66193	2791.75	0.156996	0.0638789	2.45771	0.0139827	0.829678
ENSMUSG00000040596	Pogk	71592	3099.07	-0.102255	0.0416014	-2.45798	0.0139721	0.829678
ENSMUSG00000041939	Mvk	17855	794.857	0.190044	0.0774656	2.45327	0.0141563	0.829678
ENSMUSG00000043969	Emx2	13797	330.366	-0.155085	0.0631185	-2.45704	0.0140087	0.829678
ENSMUSG00000046447	Camk2n1	66259	63829.6	-0.160895	0.0654328	-2.45893	0.0139353	0.829678
ENSMUSG00000049699	Ucn2	171530	3.16534	-0.991108	0.403995	-2.45327	0.0141564	0.829678
ENSMUSG00000049969	Plekhf2	71801	347.492	-0.119918	0.0488816	-2.45323	0.014158	0.829678
ENSMUSG00000058022	Adtrp	109254	5.08726	0.721293	0.292632	2.46485	0.0137071	0.829678
ENSMUSG00000059820	Nkapd1	270156	792.515	-0.111571	0.0454272	-2.45604	0.0140476	0.829678
ENSMUSG00000064280	Ccdc146	75172	50.4364	-0.411958	0.16757	-2.45843	0.0139548	0.829678
ENSMUSG00000068962	Zfp114	232966	46.0128	-0.339172	0.138097	-2.45603	0.0140481	0.829678
ENSMUSG00000078490	Cfap74	544678	923.849	-0.138498	0.0562247	-2.4633	0.0137666	0.829678
ENSMUSG00000083474	Gm15267	100040394	3.86694	0.848144	0.34465	2.46089	0.0138594	0.829678
ENSMUSG00000085222	Gm13974	102633438	6.04725	-0.818241	0.331945	-2.46499	0.0137018	0.829678
ENSMUSG00000031970	Dbndd1	72185	947.726	0.131211	0.0535831	2.44874	0.0143356	0.830175
ENSMUSG00000032413	Rasa2	114713	1555.32	-0.159882	0.0653124	-2.44796	0.0143666	0.830175
ENSMUSG00000050578	Mmp13	17386	3.37346	1.46788	0.599447	2.44873	0.0143362	0.830175
ENSMUSG00000059854	Hydin	244653	118.229	-0.359811	0.146967	-2.44823	0.0143558	0.830175
ENSMUSG00000098363	Mir6993	102465600	6.05612	0.697207	0.284809	2.44798	0.014366	0.830175
ENSMUSG00000103174	Gm37168	102634085	30.1596	-0.508896	0.207793	-2.44905	0.0143235	0.830175
ENSMUSG00000031786	Drc7	330830	98.2428	-0.413992	0.169211	-2.44661	0.0144209	0.831198
ENSMUSG00000034112	Atp2c2	69047	57.3089	0.507567	0.207664	2.44417	0.0145185	0.834156
ENSMUSG00000046049	Rp1l1	271209	2.2047	-1.11169	0.454962	-2.44348	0.0145465	0.834156
ENSMUSG00000046764	A530053G22Rik	208079	9.18952	1.8515	0.757845	2.44311	0.0145613	0.834156
ENSMUSG00000025815	Dhtkd1	209692	597.192	-0.184003	0.0753397	-2.44231	0.0145936	0.8343
ENSMUSG00000091285	Gm17430	102639220	1.08349	1.74382	0.714318	2.44124	0.0146371	0.835085
ENSMUSG00000020099	Unc5b	107449	1319.84	-0.20412	0.0837183	-2.43818	0.0147616	0.836885
ENSMUSG00000021696	Elovl7	74559	736.368	-0.215532	0.0889404	-2.42334	0.0153787	0.836885
ENSMUSG00000021879	Dnah12	110083	68.9809	-0.481304	0.198187	-2.42853	0.0151601	0.836885
ENSMUSG00000023882	Zfp54	22712	68.6661	0.2623	0.107627	2.43713	0.0148042	0.836885
ENSMUSG00000024052	Lpin2	64898	4050.47	0.0945167	0.0388073	2.43554	0.0148697	0.836885
ENSMUSG00000031965	Tbx20	57246	1.3176	-2.17508	0.894375	-2.43196	0.0150174	0.836885
ENSMUSG00000032085	Tagln	21345	179.136	-0.246595	0.101442	-2.43089	0.0150618	0.836885
ENSMUSG00000032652	Crebl2	232430	2255.54	0.124113	0.0509459	2.43617	0.0148436	0.836885
ENSMUSG00000034189	Hsdl1	72552	2204.36	0.103211	0.0425768	2.42412	0.0153455	0.836885
ENSMUSG00000036916	Zfp280c	208968	1229.15	-0.174809	0.0718939	-2.43149	0.015037	0.836885
ENSMUSG00000037287	Tbcel	272589	2048.08	-0.0831865	0.0343112	-2.42447	0.0153308	0.836885
ENSMUSG00000044405	Adig	246747	2.54972	-1.00549	0.412429	-2.43796	0.0147703	0.836885
ENSMUSG00000048138	Dmrt2	226049	47.7645	0.420722	0.172677	2.43647	0.0148315	0.836885
ENSMUSG00000050505	Pcdh20	219257	1167.94	-0.209465	0.0863088	-2.42693	0.0152272	0.836885
ENSMUSG00000051243	Islr2	320563	2600.47	0.194936	0.0804006	2.42456	0.0153271	0.836885
ENSMUSG00000051262	Nat8f3	93674	43.8734	-0.299702	0.123161	-2.43342	0.0149571	0.836885
ENSMUSG00000059064	Gm10059	100503585	3.93268	-0.819997	0.338044	-2.42571	0.0152784	0.836885
ENSMUSG00000060012	Kif13b	16554	1608.29	-0.194384	0.0799742	-2.43059	0.0150743	0.836885
ENSMUSG00000073535	Gm5532	433367	10.9829	0.614162	0.252728	2.43013	0.0150934	0.836885
ENSMUSG00000074508	Gm10706	100038437	5.06754	-1.07432	0.441857	-2.43139	0.0150412	0.836885
ENSMUSG00000097040	2610316D01Rik	72511	162.938	-0.175049	0.0722387	-2.42321	0.0153841	0.836885
ENSMUSG00000099980	Gm5619	434426	44.2481	0.261889	0.107788	2.42967	0.0151124	0.836885
ENSMUSG00000101678	Gm29609	115482680	53.8957	-0.265864	0.109486	-2.42829	0.0151702	0.836885
ENSMUSG00000028707	Dmbx1	140477	23.1758	0.638921	0.263966	2.42047	0.0155006	0.839457
ENSMUSG00000040734	Ppp1r13l	333654	204.053	0.219075	0.0905331	2.41984	0.0155274	0.839457
ENSMUSG00000043463	Rab9b	319642	1733.34	0.142327	0.0588303	2.41929	0.015551	0.839457
ENSMUSG00000078876	Gm14408	628110	1.50559	-1.41477	0.584332	-2.42117	0.0154707	0.839457
ENSMUSG00000028347	Tmeff1	230157	3141.06	-0.114033	0.047199	-2.41601	0.0156918	0.842608
ENSMUSG00000029082	Bst1	12182	7.67569	0.875984	0.362543	2.41622	0.0156825	0.842608
ENSMUSG00000085105	Gm12758	100126229	32.2767	-0.313905	0.129937	-2.41583	0.0156995	0.842608
ENSMUSG00000031168	Ebp	13595	512.156	0.128499	0.0532527	2.413	0.0158218	0.846765
ENSMUSG00000099440	Gm29593	108168425	13.9457	0.537235	0.222675	2.41264	0.0158373	0.846765
ENSMUSG00000018776	Slc35g3	56293	10.705	-0.514462	0.213498	-2.40969	0.0159663	0.847863
ENSMUSG00000032812	Arap1	69710	1050.71	-0.163211	0.0677391	-2.4094	0.0159786	0.847863
ENSMUSG00000048022	Tmem229a	319832	3098.33	-0.141675	0.0587974	-2.40955	0.0159723	0.847863
ENSMUSG00000043496	Tril	66873	1905.16	-0.172073	0.071503	-2.40651	0.0161056	0.851448
ENSMUSG00000028884	Rpa2	19891	504.064	0.14081	0.0585876	2.40341	0.0162431	0.853829
ENSMUSG00000054146	Krt15	16665	4.20603	-0.791628	0.329314	-2.40387	0.0162226	0.853829
ENSMUSG00000082532	Rpl31-ps6	673222	1.79347	-1.40817	0.58576	-2.40401	0.0162165	0.853829
ENSMUSG00000004056	Akt2	11652	3409.66	-0.135225	0.0563673	-2.399	0.0164397	0.854561
ENSMUSG00000005087	Cd44	12505	322.469	0.275027	0.114594	2.40001	0.0163944	0.854561
ENSMUSG00000028717	Tal1	21349	182.847	0.370143	0.154079	2.4023	0.0162925	0.854561
ENSMUSG00000086359	9630013K17Rik	78883	36.2203	-0.282475	0.117665	-2.40068	0.0163648	0.854561
ENSMUSG00000096770	Amy2a4	100043684	6.45239	0.841316	0.350397	2.40104	0.0163486	0.854561
ENSMUSG00000001119	Col6a1	12833	3794.05	0.262156	0.109955	2.38422	0.0171154	0.857079
ENSMUSG00000014704	Hoxa2	15399	0.777441	2.26102	0.952921	2.37273	0.0176573	0.857079
ENSMUSG00000019774	Mtrf1l	108853	329.802	0.119437	0.0503695	2.37121	0.0177298	0.857079
ENSMUSG00000020718	Polg2	50776	134.087	-0.151956	0.0634181	-2.39609	0.016571	0.857079
ENSMUSG00000021592	Arsk	77041	389.763	-0.145558	0.0611314	-2.38107	0.0172626	0.857079
ENSMUSG00000022814	Umps	22247	674.193	0.105217	0.0442497	2.37779	0.0174166	0.857079
ENSMUSG00000023048	Prr13	66151	1467.04	0.181239	0.0759092	2.38758	0.0169595	0.857079
ENSMUSG00000023942	Slc29a1	63959	776.994	0.122394	0.0511977	2.39062	0.01682	0.857079
ENSMUSG00000024670	Cd6	12511	71.5288	-0.708389	0.298627	-2.37216	0.0176847	0.857079
ENSMUSG00000026442	Nfasc	269116	13559.1	-0.122377	0.0513478	-2.38329	0.0171586	0.857079
ENSMUSG00000027708	Dcun1d1	114893	1352.72	-0.152369	0.0641163	-2.37644	0.0174806	0.857079
ENSMUSG00000028121	Bcar3	29815	455.138	0.152714	0.0645401	2.36618	0.0179727	0.857079
ENSMUSG00000028581	Laptm5	16792	1712.83	0.216925	0.0917597	2.36406	0.0180759	0.857079
ENSMUSG00000030849	Fgfr2	14183	1981.27	-0.161375	0.0674905	-2.39107	0.0167993	0.857079
ENSMUSG00000031487	Brf2	66653	456.494	0.12488	0.0522964	2.38792	0.0169439	0.857079
ENSMUSG00000032281	Acsbg1	94180	5119.65	-0.135025	0.0567766	-2.37818	0.0173983	0.857079
ENSMUSG00000032606	Nicn1	66257	3497.02	0.0838644	0.0350972	2.38949	0.0168717	0.857079
ENSMUSG00000032641	Gpr19	14760	583.716	0.145692	0.0614279	2.37176	0.0177036	0.857079
ENSMUSG00000033722	BC034090	207792	482.342	-0.159234	0.0669384	-2.37881	0.0173685	0.857079
ENSMUSG00000035953	Pip4p1	219024	2520.88	0.0831579	0.0347087	2.39588	0.0165804	0.857079
ENSMUSG00000036334	Igsf10	242050	224.524	0.245819	0.103812	2.36792	0.0178885	0.857079
ENSMUSG00000036678	Aaas	223921	490.92	0.113777	0.0481168	2.3646	0.0180496	0.857079
ENSMUSG00000039457	Ppl	19041	168.594	0.249436	0.104351	2.39036	0.0168317	0.857079
ENSMUSG00000041762	Gpr155	68526	2454.37	-0.13765	0.0575856	-2.39036	0.016832	0.857079
ENSMUSG00000042677	Zc3h12a	230738	47.3124	0.309866	0.130706	2.3707	0.0177542	0.857079
ENSMUSG00000043024	Gm16433	677205	0.91458	1.8926	0.790379	2.39455	0.0166409	0.857079
ENSMUSG00000043948	Olfr691	259063	6.83668	0.62466	0.264182	2.36451	0.0180541	0.857079
ENSMUSG00000049349	Gm5105	329763	10.4337	-0.548232	0.230922	-2.3741	0.0175918	0.857079
ENSMUSG00000049791	Fzd4	14366	216.563	-0.267551	0.11211	-2.3865	0.0170096	0.857079
ENSMUSG00000049940	Pgrmc2	70804	3368.1	0.0810646	0.0339803	2.38564	0.0170496	0.857079
ENSMUSG00000050973	Gdpgp1	269952	244.935	0.196873	0.0826092	2.38319	0.0171635	0.857079
ENSMUSG00000051748	Wfdc21	66107	1.43452	2.06067	0.870042	2.36847	0.017862	0.857079
ENSMUSG00000052160	Pld4	104759	334.867	0.247231	0.103987	2.37753	0.017429	0.857079
ENSMUSG00000053062	Jam2	67374	1665.47	-0.153098	0.0640725	-2.38946	0.0168734	0.857079
ENSMUSG00000055826	Tescl	69301	4.68729	1.37954	0.579164	2.38195	0.0172214	0.857079
ENSMUSG00000057842	Zfp595	218314	144.596	-0.187987	0.0792284	-2.37272	0.0176577	0.857079
ENSMUSG00000059005	Hnrnpa3	229279	9390.12	-0.0782137	0.0330371	-2.36745	0.0179112	0.857079
ENSMUSG00000065434	Mir7-1	723902	23.1358	-0.3838	0.161743	-2.3729	0.0176488	0.857079
ENSMUSG00000069072	Slc7a14	241919	6328.84	0.163184	0.0685806	2.37945	0.0173383	0.857079
ENSMUSG00000071179	Serpina16	194604	0.922145	-1.7584	0.737268	-2.38503	0.0170779	0.857079
ENSMUSG00000073680	Tmem88b	320587	3271.23	-0.209807	0.0880269	-2.38344	0.0171516	0.857079
ENSMUSG00000074555	Gm10714	100038374	11.1081	-0.62548	0.264411	-2.36555	0.0180031	0.857079
ENSMUSG00000078771	Evi2a	14017	732.671	-0.195165	0.0823516	-2.3699	0.0177931	0.857079
ENSMUSG00000082032	Gm12271	626150	1.96588	1.28068	0.53875	2.37713	0.0174481	0.857079
ENSMUSG00000082978	Rpsa-ps11	433712	17.9473	0.525548	0.220604	2.38232	0.0172041	0.857079
ENSMUSG00000083773	Gm13394	100033452	4362.82	0.547805	0.231384	2.36752	0.0179078	0.857079
ENSMUSG00000030532	Hddc3	68695	902.417	-0.578468	0.245068	-2.36044	0.0182534	0.862581
ENSMUSG00000068745	Mybphl	68753	6.33126	-0.723856	0.306951	-2.35822	0.018363	0.865127
ENSMUSG00000021134	Srsf5	20384	12487.4	-0.120419	0.0511051	-2.35631	0.0184576	0.866925
ENSMUSG00000024270	Slc39a6	106957	2211.89	0.110409	0.0468722	2.35554	0.018496	0.866925
ENSMUSG00000031434	Morc4	75746	212.903	-0.136298	0.0578888	-2.35448	0.0185487	0.866925
ENSMUSG00000063659	Zbtb18	30928	12004	-0.121361	0.0515474	-2.35436	0.0185547	0.866925
ENSMUSG00000002274	Metrn	70083	140.774	-0.217605	0.0925395	-2.35148	0.0186989	0.867673
ENSMUSG00000021613	Hapln1	12950	863.06	-0.173653	0.073792	-2.35327	0.0186091	0.867673
ENSMUSG00000041187	Prkd2	101540	290.852	0.273671	0.116342	2.3523	0.0186576	0.867673
ENSMUSG00000086236	5830418P13Rik	100529079	49.4031	-0.32584	0.138571	-2.35143	0.0187012	0.867673
ENSMUSG00000036687	Tmem184a	231832	7.17885	-0.6	0.255365	-2.34958	0.0187948	0.869145
ENSMUSG00000043164	Tmem212	208613	49.406	-0.51241	0.218052	-2.34995	0.0187759	0.869145
ENSMUSG00000026843	Fubp3	320267	1640.12	-0.0929619	0.0395858	-2.34836	0.0188561	0.870544
ENSMUSG00000021608	Lpcat1	210992	1771.59	-0.0722641	0.0308246	-2.34436	0.0190597	0.87706
ENSMUSG00000056515	Rab31	106572	2915.81	-0.0982167	0.0418883	-2.34473	0.0190409	0.87706
ENSMUSG00000026830	Ermn	77767	2121.14	-0.264958	0.113083	-2.34303	0.0191278	0.877191
ENSMUSG00000029223	Uchl1	22223	16604.4	0.188654	0.0805445	2.34223	0.019169	0.877191
ENSMUSG00000034422	Parp14	547253	169.432	0.296509	0.126612	2.34187	0.0191876	0.877191
ENSMUSG00000036693	Nop14	75416	808.964	0.0851543	0.0363593	2.34202	0.0191797	0.877191
ENSMUSG00000028150	Rorc	19885	93.4078	0.26896	0.114886	2.34111	0.0192267	0.877549
ENSMUSG00000013465	Nelfb	58202	2404.79	0.0971361	0.0415057	2.34031	0.0192679	0.878004
ENSMUSG00000003623	Crot	74114	1240.39	-0.127053	0.0545166	-2.33054	0.0197776	0.880275
ENSMUSG00000004341	Gpx6	75512	19.5667	-0.829431	0.35579	-2.33124	0.0197408	0.880275
ENSMUSG00000023439	Gnb3	14695	18.9379	-0.731557	0.313989	-2.32988	0.0198123	0.880275
ENSMUSG00000026893	Gca	227960	644.291	-0.139644	0.059884	-2.33192	0.0197051	0.880275
ENSMUSG00000031241	Tbx22	245572	8.88879	-0.521025	0.223437	-2.33186	0.0197078	0.880275
ENSMUSG00000031841	Cdh13	12554	2966.3	0.154442	0.0662082	2.33267	0.0196653	0.880275
ENSMUSG00000033904	Ccp110	101565	3361.94	-0.146472	0.062833	-2.33114	0.0197462	0.880275
ENSMUSG00000035697	Arhgap45	70719	403.238	0.233156	0.100066	2.33002	0.0198053	0.880275
ENSMUSG00000040435	Ppp1r15a	17872	566.515	0.115795	0.0497029	2.32975	0.0198195	0.880275
ENSMUSG00000045777	Ifitm10	320802	626.597	0.175696	0.0753076	2.33304	0.0196458	0.880275
ENSMUSG00000063535	Zfp773	76373	101.077	0.198922	0.0853639	2.33028	0.0197913	0.880275
ENSMUSG00000078776	9530053A07Rik	319482	13.2178	-0.430406	0.184283	-2.33557	0.0195136	0.880275
ENSMUSG00000079263	Gm6614	625716	1.72177	2.25025	0.965376	2.33096	0.0197557	0.880275
ENSMUSG00000079445	B3gnt7	227327	38.2223	0.320557	0.13739	2.33318	0.0196385	0.880275
ENSMUSG00000100583	Gm29443	102634559	16.5624	-0.636915	0.272369	-2.33842	0.0193654	0.880275
ENSMUSG00000048442	Smim5	66528	55.0258	-0.287068	0.123283	-2.32853	0.0198839	0.881741
ENSMUSG00000026205	Slc23a3	22626	27.1023	-0.543773	0.233772	-2.32609	0.020014	0.882643
ENSMUSG00000036257	Pnpla8	67452	4935.46	0.134426	0.0577654	2.3271	0.0199597	0.882643
ENSMUSG00000036905	C1qb	12260	1636.99	0.328285	0.1411	2.32661	0.0199862	0.882643
ENSMUSG00000022548	Apod	11815	6665.95	0.424466	0.182931	2.32036	0.0203213	0.884896
ENSMUSG00000028644	Ermap	27028	34.1873	-0.35816	0.154395	-2.31977	0.0203534	0.884896
ENSMUSG00000029560	Snx8	231834	714.602	0.174421	0.0751886	2.31979	0.0203525	0.884896
ENSMUSG00000030402	Ppm1n	232941	5.25481	0.894142	0.384943	2.32279	0.0201904	0.884896
ENSMUSG00000032098	Treh	58866	8.20539	-0.618729	0.266461	-2.32202	0.0202316	0.884896
ENSMUSG00000037972	Snn	20621	8550.87	-0.0975238	0.0420442	-2.31956	0.0203649	0.884896
ENSMUSG00000045294	Insig1	231070	2652.42	0.184411	0.0794269	2.32177	0.0202452	0.884896
ENSMUSG00000065187	Gm25136	108169173	2.46483	-1.10703	0.476925	-2.32119	0.0202767	0.884896
ENSMUSG00000065611	Mir23a	387216	4.30029	0.812896	0.350229	2.32104	0.0202846	0.884896
ENSMUSG00000046223	Plaur	18793	36.4857	0.456011	0.1967	2.31831	0.0204325	0.885093
ENSMUSG00000053965	Pde5a	242202	430.956	-0.208124	0.0897577	-2.31873	0.0204096	0.885093
ENSMUSG00000099927	Gm8226	666669	82.4929	0.238527	0.102942	2.3171	0.0204983	0.886577
ENSMUSG00000001827	Folr1	14275	44.6049	-0.834882	0.360968	-2.3129	0.0207283	0.888813
ENSMUSG00000026407	Cacna1s	12292	34.1434	-0.328164	0.142003	-2.31096	0.020835	0.888813
ENSMUSG00000064325	Hhip	15245	187.465	-0.291638	0.12619	-2.3111	0.0208273	0.888813
ENSMUSG00000079017	Ifi27l2a	76933	48.2821	0.553863	0.239392	2.31362	0.0206883	0.888813
ENSMUSG00000086844	B230206H07Rik	320871	109.501	-0.36523	0.157923	-2.31271	0.0207383	0.888813
ENSMUSG00000096594	Igkv8-19	232065	1.4331	-1.6272	0.703942	-2.31156	0.020802	0.888813
ENSMUSG00000099553	Gm29538	102636980	1.45263	-1.31449	0.568149	-2.31364	0.0206877	0.888813
ENSMUSG00000042793	Lgr6	329252	236.991	-0.603167	0.261112	-2.31	0.0208884	0.889737
ENSMUSG00000087142	Gm12454	100503819	10.1989	0.639052	0.277036	2.30675	0.0210687	0.896057
ENSMUSG00000022472	Desi1	28075	4267.17	-0.111942	0.0486154	-2.30261	0.021301	0.900346
ENSMUSG00000027668	Mfn1	67414	3802	-0.083981	0.0364893	-2.30152	0.021362	0.900346
ENSMUSG00000029816	Gpnmb	93695	193.174	0.561605	0.244007	2.3016	0.0213578	0.900346
ENSMUSG00000034998	Foxn2	14236	887.009	-0.146186	0.0634856	-2.30267	0.0212977	0.900346
ENSMUSG00000035683	Melk	17279	26.6717	-0.417916	0.181481	-2.30281	0.0212897	0.900346
ENSMUSG00000044456	Rin3	217835	137.56	0.270149	0.117286	2.30334	0.0212597	0.900346
ENSMUSG00000040396	Abhd13	68904	1731.68	-0.143893	0.0625467	-2.30056	0.0214163	0.901283
ENSMUSG00000032359	Ctsh	13036	411.019	0.246683	0.107324	2.29848	0.0215345	0.904901
ENSMUSG00000032269	Htr3a	15561	246.051	0.253939	0.110567	2.29669	0.0216364	0.906467
ENSMUSG00000035762	Tmem161b	72745	856.856	-0.117511	0.0511648	-2.29671	0.0216354	0.906467
ENSMUSG00000033458	Fan1	330554	425.447	-0.153644	0.0669189	-2.29597	0.0216774	0.906834
ENSMUSG00000026839	Upp2	76654	1000.12	0.0976146	0.0425382	2.29475	0.0217473	0.908402
ENSMUSG00000065405	Mir30a	387225	0.589268	2.04175	0.890254	2.29344	0.0218225	0.910188
ENSMUSG00000097139	Gm26626	102632310	1.47304	1.60944	0.701986	2.2927	0.0218653	0.910621
ENSMUSG00000025439	Clns1a	12729	1736.1	0.14946	0.06521	2.29197	0.0219071	0.910914
ENSMUSG00000051297	2410124H12Rik	76785	1.78319	1.28104	0.559052	2.29145	0.0219372	0.910914
ENSMUSG00000095912	Gm3317	666329	4.30205	-0.804801	0.351574	-2.28914	0.0220714	0.915131
ENSMUSG00000020843	Timm22	56322	1167.9	0.117139	0.0512141	2.28724	0.0221818	0.916273
ENSMUSG00000031380	Vegfd	14205	104.824	0.234899	0.102737	2.28642	0.0222295	0.916273
ENSMUSG00000034664	Itga2b	16399	177.98	0.231103	0.101049	2.28704	0.0221936	0.916273
ENSMUSG00000085527	Gm15535	100042125	76.0381	-0.443422	0.193937	-2.28642	0.0222294	0.916273
ENSMUSG00000022216	Psme1	19186	1266.93	0.13545	0.0593159	2.28353	0.0223989	0.916525
ENSMUSG00000034641	Cd300ld	217305	6.73522	0.963441	0.421762	2.28433	0.0223523	0.916525
ENSMUSG00000063556	Gm10132	100043755	16.3681	0.426831	0.186872	2.28408	0.0223666	0.916525
ENSMUSG00000066538	Gm6254	621710	771.035	-0.245533	0.107488	-2.28428	0.0223549	0.916525
ENSMUSG00000069188	Gm13192	100040426	3.91347	-0.851606	0.3729	-2.28374	0.0223869	0.916525
ENSMUSG00000052397	Ezr	22350	1898.81	-0.196794	0.0863117	-2.28003	0.0226056	0.923108
ENSMUSG00000029168	Dpysl5	65254	1812.34	0.159923	0.0702083	2.27783	0.0227366	0.924728
ENSMUSG00000069971	4933402J07Rik	330820	1.55171	1.79615	0.788739	2.27724	0.0227718	0.924728
ENSMUSG00000074282	Zfp94	22756	434.068	0.124927	0.0548689	2.27682	0.022797	0.924728
ENSMUSG00000006127	Inpp5k	19062	2043.92	0.0773734	0.0340179	2.27449	0.0229364	0.926878
ENSMUSG00000039543	Cfap70	76670	80.5724	-0.299087	0.131484	-2.2747	0.022924	0.926878
ENSMUSG00000097337	Gm26606	102633765	125.355	-0.225005	0.0989584	-2.27373	0.0229821	0.926878
ENSMUSG00000102408	4930568G15Rik	75857	14.5808	-0.400795	0.176268	-2.27379	0.0229789	0.926878
ENSMUSG00000038292	Ccdc155	384619	184.756	-0.181564	0.0798748	-2.27311	0.0230194	0.927052
ENSMUSG00000000340	Dbt	13171	719.528	-0.138759	0.0610716	-2.27208	0.023082	0.928239
ENSMUSG00000005237	Dnah2	327954	324.886	-0.218122	0.096086	-2.27007	0.0232034	0.929996
ENSMUSG00000006920	Ezh1	14055	3125.51	0.0790966	0.0349586	2.26258	0.0236617	0.929996
ENSMUSG00000022112	Gpc5	103978	1136.21	-0.105402	0.0466743	-2.25825	0.0239301	0.929996
ENSMUSG00000022964	Tmem50b	77975	3703.66	-0.0802065	0.0354059	-2.26534	0.0234917	0.929996
ENSMUSG00000024965	Fermt3	108101	191.251	0.193406	0.085307	2.26718	0.0233794	0.929996
ENSMUSG00000025784	Clec3b	21922	129.335	-0.552927	0.244013	-2.26598	0.0234528	0.929996
ENSMUSG00000026516	Nvl	67459	3329.1	-0.109342	0.0482033	-2.26835	0.023308	0.929996
ENSMUSG00000027858	Tspan2	70747	3877.13	-0.211282	0.0931769	-2.26754	0.0233575	0.929996
ENSMUSG00000032415	Ube2cbp	70348	76.8722	0.194691	0.0860103	2.26358	0.0235997	0.929996
ENSMUSG00000041377	Ninj2	29862	54.3931	-0.458812	0.202449	-2.26631	0.0234323	0.929996
ENSMUSG00000049872	Calhm5	103511	186.344	0.18803	0.0832777	2.25787	0.0239539	0.929996
ENSMUSG00000050335	Lgals3	16854	66.7952	0.468504	0.207155	2.26161	0.0237218	0.929996
ENSMUSG00000054676	1600014C10Rik	72244	1222.09	0.100448	0.0443381	2.26551	0.0234813	0.929996
ENSMUSG00000065470	Mir149	387167	10.6971	-0.591429	0.261586	-2.26094	0.0237633	0.929996
ENSMUSG00000065822	Snord15a	449630	1.80513	1.21149	0.535557	2.26212	0.0236902	0.929996
ENSMUSG00000066442	Mthfs	107885	98.8217	-0.201884	0.0892965	-2.26083	0.0237698	0.929996
ENSMUSG00000066760	Psg16	26436	416.64	0.154952	0.0682887	2.26907	0.0232639	0.929996
ENSMUSG00000080186	Gm14448	668972	15.4384	-0.434805	0.192549	-2.25815	0.0239362	0.929996
ENSMUSG00000084302	Gm12194	380696	4.8652	-0.770632	0.34012	-2.26577	0.0234657	0.929996
ENSMUSG00000087301	Gm13629	100038743	178.273	0.175893	0.0777067	2.26355	0.023602	0.929996
ENSMUSG00000090667	Gm765	330390	73.6013	-0.581632	0.257403	-2.25961	0.0238452	0.929996
ENSMUSG00000090744	Gm6871	628359	0.902564	-1.84278	0.815671	-2.25922	0.0238695	0.929996
ENSMUSG00000094845	Tmem95	100503361	3.74573	-0.863962	0.382315	-2.25982	0.0238326	0.929996
ENSMUSG00000097290	1300002E11Rik	100043489	437.185	-0.134149	0.0591372	-2.26844	0.0233022	0.929996
ENSMUSG00000103710	D030062O11Rik	100038531	3.42356	-0.947638	0.418778	-2.26286	0.0236441	0.929996
ENSMUSG00000025373	Rnf41	67588	2728.47	0.147095	0.0652312	2.25498	0.0241347	0.930585
ENSMUSG00000032218	Ccnb2	12442	41.1374	0.290339	0.128743	2.25518	0.0241217	0.930585
ENSMUSG00000042045	Sln	66402	15.013	-0.48611	0.215415	-2.25662	0.0240317	0.930585
ENSMUSG00000074872	Ctxn2	381418	402.933	0.213644	0.0946827	2.25642	0.0240441	0.930585
ENSMUSG00000097280	AI849053	329697	57.9585	-0.256703	0.113838	-2.25498	0.0241349	0.930585
ENSMUSG00000015846	Rxra	20181	1617.13	0.125241	0.0555646	2.25398	0.0241976	0.93135
ENSMUSG00000042834	Nrep	27528	2792.55	-0.146477	0.0649969	-2.2536	0.0242211	0.93135
ENSMUSG00000004267	Eno2	13807	38705.2	0.124765	0.0555267	2.24693	0.0246445	0.932685
ENSMUSG00000005503	Evx1	14028	3.70502	1.70737	0.75826	2.2517	0.0243412	0.932685
ENSMUSG00000027162	Lin7c	22343	3164.96	-0.159835	0.0711826	-2.24542	0.0247409	0.932685
ENSMUSG00000027998	Plrg1	53317	1242.36	0.0998512	0.0444769	2.24501	0.0247672	0.932685
ENSMUSG00000029482	Aacs	78894	1925.31	0.145137	0.0644722	2.25116	0.0243755	0.932685
ENSMUSG00000031708	Tecr	106529	10745.1	0.1348	0.0599912	2.247	0.02464	0.932685
ENSMUSG00000042190	Cmklr1	14747	133.644	0.283782	0.126446	2.24429	0.0248137	0.932685
ENSMUSG00000044017	Adgrd1	243277	192.681	-0.208446	0.0927365	-2.24773	0.0245937	0.932685
ENSMUSG00000050103	Agmo	319660	244.393	-0.193365	0.0859905	-2.24868	0.0245327	0.932685
ENSMUSG00000052485	Tmem171	380863	7.51941	0.689935	0.307433	2.24418	0.0248206	0.932685
ENSMUSG00000060548	Tnfrsf19	29820	2317.85	-0.116156	0.0516251	-2.25	0.024449	0.932685
ENSMUSG00000061808	Ttr	22139	10592	-0.619702	0.276099	-2.24449	0.024801	0.932685
ENSMUSG00000072663	Spef2	320277	81.7547	-0.329698	0.146533	-2.25	0.0244493	0.932685
ENSMUSG00000079657	Rab26	328778	1478.33	0.172412	0.0767873	2.24532	0.0247476	0.932685
ENSMUSG00000090121	Abhd12b	100504285	114.882	-0.599223	0.266517	-2.24835	0.0245539	0.932685
ENSMUSG00000094248	Hist1h2ao	665433	0.959999	-1.77288	0.788576	-2.2482	0.0245636	0.932685
ENSMUSG00000042797	Aqp11	66333	462.172	-0.225709	0.100599	-2.24365	0.0248551	0.932731
ENSMUSG00000073073	Gm8098	666427	115.046	-0.229425	0.102292	-2.24284	0.0249072	0.933439
ENSMUSG00000024501	Dpysl3	22240	2385.35	0.135961	0.0606804	2.24062	0.0250509	0.933743
ENSMUSG00000027956	Tmem144	70652	429.348	-0.127878	0.0570508	-2.24148	0.0249949	0.933743
ENSMUSG00000038007	Acer2	230379	371.148	0.369025	0.164648	2.2413	0.0250068	0.933743
ENSMUSG00000087113	Gm11714	108167930	10.7601	-0.618306	0.275897	-2.24108	0.025021	0.933743
ENSMUSG00000086095	Gm15328	328906	190.876	-0.19113	0.0853698	-2.23885	0.0251658	0.935151
ENSMUSG00000090919	Pabpc4l	241989	20.1466	-0.400413	0.178873	-2.23854	0.0251861	0.935151
ENSMUSG00000022114	Spry2	24064	1526.91	-0.131074	0.0585997	-2.23677	0.0253016	0.935724
ENSMUSG00000051768	Xrcc1	22594	1046.91	0.131753	0.0588936	2.23714	0.0252771	0.935724
ENSMUSG00000079215	Zfp664	269704	5072.14	-0.067239	0.0300573	-2.23703	0.0252845	0.935724
ENSMUSG00000025582	Nptx1	18164	13129.5	0.17703	0.0791675	2.23615	0.025342	0.935988
ENSMUSG00000028064	Sema4a	20351	2613.27	0.146175	0.0654338	2.23393	0.0254874	0.940121
ENSMUSG00000027087	Itgav	16410	4115.09	-0.147327	0.0659733	-2.23313	0.0255406	0.940847
ENSMUSG00000008090	Fgfrl1	116701	616.092	-0.192221	0.0861493	-2.23126	0.025664	0.941615
ENSMUSG00000025196	Cpn1	93721	16.007	-0.475447	0.21313	-2.23078	0.0256956	0.941615
ENSMUSG00000035529	Prdm4	72843	1276.32	0.0687018	0.0307776	2.23221	0.0256014	0.941615
ENSMUSG00000089791	Gm3555	100041868	109.53	0.314712	0.141065	2.23098	0.0256826	0.941615
ENSMUSG00000026088	Mitd1	69028	267.858	-0.121781	0.0546417	-2.22872	0.0258324	0.941708
ENSMUSG00000032417	Rwdd2a	69519	766.074	0.177259	0.0794926	2.22988	0.0257552	0.941708
ENSMUSG00000062235	Gm5341	384719	1.17365	1.75137	0.785556	2.22946	0.025783	0.941708
ENSMUSG00000091898	Tnnc1	21924	171.741	-0.308101	0.138226	-2.22896	0.0258165	0.941708
ENSMUSG00000097079	Gm26604	233045	6.36624	-0.758146	0.340367	-2.22744	0.0259179	0.943599
ENSMUSG00000032496	Ltf	17002	18.7738	1.26911	0.570187	2.22578	0.026029	0.945191
ENSMUSG00000073627	C130036L24Rik	319336	124.194	-0.198437	0.0892235	-2.22404	0.0261455	0.948198
ENSMUSG00000038886	Man2a2	140481	9650.3	-0.0778413	0.0350336	-2.22191	0.0262897	0.949744
ENSMUSG00000060882	Kcnd2	16508	4587.26	-0.104486	0.047012	-2.22255	0.0262461	0.949744
ENSMUSG00000073650	Catip	241112	93.4015	-0.329137	0.148127	-2.22199	0.0262843	0.949744
ENSMUSG00000023094	Msrb2	76467	756.931	0.114801	0.0517043	2.22035	0.0263953	0.950471
ENSMUSG00000031990	Jam3	83964	1485.03	-0.0809201	0.036449	-2.22009	0.0264126	0.950471
ENSMUSG00000044948	Cfap43	100048534	153.928	-0.323395	0.145699	-2.21961	0.0264452	0.950471
ENSMUSG00000078895	Gm11009	102640556	1.99662	1.09198	0.491758	2.22057	0.0263798	0.950471
ENSMUSG00000062198	2700097O09Rik	72658	483.782	-0.14556	0.0656039	-2.21877	0.0265026	0.951314
ENSMUSG00000026728	Vim	22352	1687.69	0.321074	0.144822	2.21703	0.0266208	0.951906
ENSMUSG00000061086	Myl4	17896	272.589	-0.354484	0.159849	-2.21761	0.0265813	0.951906
ENSMUSG00000086889	Phf2os1	102642832	108.406	-0.221184	0.0997473	-2.21744	0.0265927	0.951906
ENSMUSG00000030536	Iqgap1	29875	1616.57	-0.168766	0.076155	-2.21609	0.0266853	0.952357
ENSMUSG00000074591	Ankub1	242037	79.2153	-0.327473	0.147786	-2.21586	0.0267013	0.952357
ENSMUSG00000004473	Clec11a	20256	173.332	-0.155768	0.070436	-2.21148	0.0270023	0.954904
ENSMUSG00000020917	Acly	104112	7470.87	0.114895	0.0519686	2.21085	0.0270466	0.954904
ENSMUSG00000021567	Nkd2	72293	201.162	0.165721	0.0748687	2.21348	0.0268645	0.954904
ENSMUSG00000024799	Tm7sf2	73166	794.243	0.112877	0.0510684	2.21031	0.0270834	0.954904
ENSMUSG00000030621	Me3	109264	2313.13	-0.169742	0.0767418	-2.21186	0.0269766	0.954904
ENSMUSG00000043931	Gimap7	231932	1.18336	1.85158	0.837425	2.21103	0.0270335	0.954904
ENSMUSG00000058325	Dock1	330662	1242.91	-0.141588	0.0640703	-2.20989	0.0271129	0.954904
ENSMUSG00000074489	Bglap3	12095	38.7242	-0.40598	0.183704	-2.20996	0.0271077	0.954904
ENSMUSG00000086328	2700033N17Rik	72603	116.791	-0.214614	0.0971085	-2.21004	0.0271025	0.954904
ENSMUSG00000095344	Gm6838	628081	4.00049	1.35853	0.614616	2.21037	0.0270796	0.954904
ENSMUSG00000022949	Clic6	209195	441.757	-0.294083	0.133116	-2.20922	0.027159	0.95533
ENSMUSG00000073094	Smim9	434800	4.08851	0.767111	0.347555	2.20716	0.0273026	0.959179
ENSMUSG00000022790	Igsf11	207683	1281.3	-0.101354	0.0459546	-2.20552	0.0274174	0.960806
ENSMUSG00000032705	Exd2	97827	3772.14	-0.0911976	0.0413423	-2.20591	0.0273901	0.960806
ENSMUSG00000028293	Slc35a1	24060	817.308	-0.0916142	0.0415923	-2.20267	0.0276177	0.961559
ENSMUSG00000031173	Otc	18416	4.01733	-0.863887	0.392021	-2.20368	0.0275471	0.961559
ENSMUSG00000036854	Hspb6	243912	220.605	0.178219	0.0809151	2.20254	0.0276274	0.961559
ENSMUSG00000038563	Efl1	101592	541.007	0.111584	0.0506234	2.20419	0.0275111	0.961559
ENSMUSG00000085058	8030453O22Rik	77209	89.9783	-0.210679	0.0956845	-2.20181	0.0276787	0.961559
ENSMUSG00000092679	Mir5129	100628598	0.804195	-1.9011	0.862527	-2.20411	0.0275166	0.961559
ENSMUSG00000018930	Ccl4	20303	16.0259	0.894771	0.406662	2.20028	0.0277869	0.962866
ENSMUSG00000065557	Mirlet7c-1	387246	2.4347	1.03178	0.46903	2.19983	0.0278192	0.962866
ENSMUSG00000085733	Arhgap27os1	102638353	0.938815	-1.73114	0.786705	-2.20049	0.0277721	0.962866
ENSMUSG00000022682	Rrn3	106298	2618.11	0.0629873	0.0286622	2.19757	0.0279796	0.965042
ENSMUSG00000028874	Fgr	14191	20.7452	0.678392	0.308847	2.19653	0.0280539	0.965042
ENSMUSG00000029464	Gpn3	68080	514.043	0.111329	0.0506766	2.19686	0.0280304	0.965042
ENSMUSG00000056498	Tmem154	320782	31.4733	0.442568	0.201476	2.19663	0.0280471	0.965042
ENSMUSG00000027375	Mal	17153	5977.16	-0.180605	0.0822425	-2.19601	0.0280915	0.965151
ENSMUSG00000019873	Reep3	28193	1567.64	-0.135536	0.0617827	-2.19375	0.0282537	0.966964
ENSMUSG00000021709	Erbin	59079	4567	-0.172414	0.0786332	-2.19264	0.0283334	0.966964
ENSMUSG00000031995	St14	19143	67.6183	0.369042	0.168196	2.19412	0.0282266	0.966964
ENSMUSG00000032101	Ddx25	30959	1735.02	0.0946829	0.0431752	2.193	0.0283077	0.966964
ENSMUSG00000071657	Bscl2	14705	3063.99	0.10431	0.0476094	2.19097	0.0284543	0.966964
ENSMUSG00000074067	Gm10619	100579147	2.69858	-0.979309	0.446901	-2.19133	0.0284279	0.966964
ENSMUSG00000075070	4932412D23Rik	75722	3.1245	-0.954385	0.435515	-2.19139	0.0284234	0.966964
ENSMUSG00000059974	Ntm	235106	7288.42	-0.0950006	0.043389	-2.18951	0.0285598	0.968204
ENSMUSG00000034739	Mfrp	259172	95.6579	-0.529725	0.242052	-2.18848	0.0286349	0.968411
ENSMUSG00000083964	Gm14122	100043832	77.6719	0.184516	0.0843394	2.18778	0.0286853	0.96895
ENSMUSG00000036615	Rfxap	170767	1142.35	0.0923737	0.0422374	2.18701	0.0287416	0.969683
ENSMUSG00000019927	Ube2d1	216080	1753.3	-0.0610122	0.0279042	-2.18648	0.0287803	0.969822
ENSMUSG00000037568	Vash2	226841	222.782	0.167986	0.0769003	2.18446	0.0289284	0.970695
ENSMUSG00000047415	Gpr68	238377	505.433	0.152553	0.0698577	2.18377	0.0289791	0.970695
ENSMUSG00000080687	Mir1197	100316751	8.18081	-0.615972	0.281914	-2.18497	0.0288911	0.970695
ENSMUSG00000026074	Map4k4	26921	5348.55	-0.0908607	0.0416188	-2.18316	0.0290238	0.971033
ENSMUSG00000001930	Vwf	22371	656.419	0.557183	0.25547	2.18101	0.0291823	0.971705
ENSMUSG00000044976	Wdr72	546144	4.93217	-0.987879	0.452762	-2.18189	0.0291174	0.971705
ENSMUSG00000079330	Lemd1	213409	419.875	-0.200856	0.0920853	-2.1812	0.0291687	0.971705
ENSMUSG00000037752	Xkr8	381560	323.289	0.131957	0.0605315	2.17996	0.0292602	0.973144
ENSMUSG00000037469	Acp7	101744	92.4523	0.20464	0.0940367	2.17618	0.029542	0.975237
ENSMUSG00000039763	Dnajc28	246738	508.274	0.10967	0.0503508	2.17811	0.0293975	0.975237
ENSMUSG00000056737	Capg	12332	112.353	0.444734	0.204224	2.17768	0.0294301	0.975237
ENSMUSG00000065493	Mir34a	723848	1.654	-1.1456	0.526507	-2.17585	0.0295663	0.975237
ENSMUSG00000071637	Cebpd	12609	154.745	0.40893	0.187896	2.17637	0.0295279	0.975237
ENSMUSG00000082491	Gm5909	546075	7.52695	0.627953	0.288448	2.177	0.0294803	0.975237
ENSMUSG00000041515	Irf8	15900	296.203	0.195077	0.0896943	2.17491	0.0296371	0.976423
ENSMUSG00000097481	D330020A13Rik	791395	1.80614	-1.28363	0.590631	-2.17333	0.0297556	0.979181
ENSMUSG00000051499	Zfp786	330301	172.509	0.134636	0.061995	2.17172	0.0298764	0.980856
ENSMUSG00000063234	Gpr84	80910	48.8013	0.388104	0.178694	2.17189	0.0298641	0.980856
ENSMUSG00000024064	Galnt14	71685	887.42	0.0919657	0.042397	2.16916	0.0300707	0.984488
ENSMUSG00000024070	Prkd3	75292	803.132	-0.139706	0.0644277	-2.16841	0.0301272	0.984488
ENSMUSG00000033373	Fntb	110606	1044.84	0.102988	0.0474664	2.16969	0.03003	0.984488
ENSMUSG00000015944	Castor2	80909	7429.17	0.125375	0.0581294	2.15683	0.0310191	0.984961
ENSMUSG00000018932	Map2k3	26397	636.99	0.144843	0.0670909	2.15891	0.030857	0.984961
ENSMUSG00000023015	Racgap1	26934	574.215	0.122072	0.0565879	2.1572	0.0309898	0.984961
ENSMUSG00000025795	Rassf3	192678	1652.77	-0.180794	0.0834892	-2.16548	0.030351	0.984961
ENSMUSG00000026068	Il18rap	16174	9.19037	0.794198	0.367116	2.16334	0.0305147	0.984961
ENSMUSG00000026678	Rgs5	19737	2662.69	-0.184685	0.0855109	-2.15978	0.0307896	0.984961
ENSMUSG00000029312	Klhl8	246293	1278.72	0.0857797	0.0397533	2.1578	0.0309434	0.984961
ENSMUSG00000029754	Dlx6	13396	365.494	-0.187697	0.0867485	-2.16369	0.0304878	0.984961
ENSMUSG00000031295	Phka2	110094	1708.48	0.122152	0.0566074	2.15788	0.0309371	0.984961
ENSMUSG00000032349	Elovl5	68801	3126.2	-0.117227	0.0542162	-2.16221	0.0306022	0.984961
ENSMUSG00000038252	Ncapd2	68298	1027.34	-0.181978	0.0840007	-2.16639	0.0302813	0.984961
ENSMUSG00000041165	Spem1	74288	5.19531	-0.604329	0.279253	-2.16409	0.0304572	0.984961
ENSMUSG00000048031	Fcrl5	329693	2.4051	1.42176	0.65911	2.15709	0.0309986	0.984961
ENSMUSG00000063558	Aox1	11761	398.224	-0.174116	0.0805228	-2.16232	0.0305933	0.984961
ENSMUSG00000067786	Nnat	18111	6852.96	0.207079	0.095926	2.15874	0.0308703	0.984961
ENSMUSG00000075224	Lrrc55	241528	960.119	-0.1699	0.0785911	-2.16182	0.0306321	0.984961
ENSMUSG00000081721	Gm13882	100043349	40.1132	0.295543	0.136579	2.16389	0.0304725	0.984961
ENSMUSG00000083924	Gm12304	100415920	1.21307	1.25782	0.582963	2.15763	0.0309565	0.984961
ENSMUSG00000086395	A630014C17Rik	399633	8.31559	-0.510188	0.236004	-2.16178	0.0306351	0.984961
ENSMUSG00000089764	Gm16580	100417756	9.82465	0.552816	0.255046	2.16751	0.0301957	0.984961
ENSMUSG00000098232	Gm3671	100042107	4.51654	0.735163	0.339851	2.16319	0.0305266	0.984961
ENSMUSG00000036790	Slitrk2	245450	1418.73	-0.132219	0.0613346	-2.15571	0.0311067	0.986626
ENSMUSG00000010936	Vac14	234729	1167.53	0.0954257	0.0442997	2.15409	0.0312328	0.986628
ENSMUSG00000037610	Kcnmb2	72413	151.659	0.162919	0.0756374	2.15395	0.0312442	0.986628
ENSMUSG00000048537	Phldb1	102693	5926.93	-0.159011	0.0738379	-2.15352	0.0312781	0.986628
ENSMUSG00000061531	Tmem236	625286	10.8872	-0.473953	0.220153	-2.15284	0.0313314	0.986628
ENSMUSG00000084949	Gm16249	102633259	1.0572	-1.46061	0.678541	-2.15258	0.0313518	0.986628
ENSMUSG00000092746	Rn7s6	109568	16.5523	-1.7551	0.815449	-2.15231	0.0313733	0.986628
ENSMUSG00000031467	Agpat5	52123	2577.82	-0.0654162	0.030433	-2.14951	0.0315937	0.987566
ENSMUSG00000034708	Grn	14824	2203.19	0.149071	0.069315	2.15063	0.0315055	0.987566
ENSMUSG00000086206	Gm13783	100415786	9.77729	-0.463814	0.215675	-2.15052	0.0315137	0.987566
ENSMUSG00000097960	A330074K22Rik	434353	413.625	0.217608	0.101227	2.14969	0.0315794	0.987566
ENSMUSG00000045201	Lrrc3b	218763	507.406	0.116314	0.0541303	2.14878	0.031652	0.988288
ENSMUSG00000009281	Rarres2	71660	109.494	-0.283722	0.132229	-2.14568	0.0318983	0.988771
ENSMUSG00000020241	Col6a2	12834	921.207	0.209943	0.0979191	2.14405	0.032029	0.988771
ENSMUSG00000025389	Mip	17339	1.7924	1.10331	0.514274	2.14537	0.0319234	0.988771
ENSMUSG00000047261	Gap43	14432	8859.64	0.135917	0.0634013	2.14375	0.0320526	0.988771
ENSMUSG00000054474	Thnsl2	232078	155.555	0.171361	0.0799103	2.14442	0.0319994	0.988771
ENSMUSG00000057615	Ldoc1	434784	61.9356	0.319904	0.149107	2.14547	0.0319154	0.988771
ENSMUSG00000061802	Armc4	74934	29.5753	-0.392784	0.183004	-2.14632	0.0318476	0.988771
ENSMUSG00000070960	Gm19680	100503415	150.731	0.174797	0.0814134	2.14702	0.0317913	0.988771
ENSMUSG00000081835	Gm11790	100416922	1.76203	1.25662	0.585107	2.14768	0.0317395	0.988771
ENSMUSG00000097540	1700037F24Rik	73285	22.305	-0.366335	0.170878	-2.14383	0.0320461	0.988771
ENSMUSG00000014776	Nol3	78688	719.554	0.165966	0.0774507	2.14287	0.0321239	0.989811
ENSMUSG00000038067	Csf3	12985	5.11599	0.934728	0.436311	2.14234	0.032166	0.990021
ENSMUSG00000007097	Atp1a2	98660	40390.1	-0.130159	0.0614094	-2.11953	0.0340457	0.991134
ENSMUSG00000017446	C1qtnf1	56745	116.54	0.19767	0.0930074	2.12532	0.0335602	0.991134
ENSMUSG00000018500	Adora2b	11541	155.746	-0.159396	0.0750494	-2.12388	0.0336805	0.991134
ENSMUSG00000018830	Myh11	17880	170.467	-0.316196	0.148858	-2.12415	0.0336572	0.991134
ENSMUSG00000020660	Pomc	18976	93.82	-0.741568	0.346445	-2.14051	0.0323136	0.991134
ENSMUSG00000020774	Aspa	11484	916.573	-0.227167	0.107085	-2.12137	0.0338906	0.991134
ENSMUSG00000021221	Dpf3	70127	189.8	-0.170181	0.0799577	-2.12839	0.0333048	0.991134
ENSMUSG00000023147	Wrb	71446	2165.01	0.0781441	0.0368743	2.1192	0.0340735	0.991134
ENSMUSG00000024519	Cplx4	225644	1.81813	-1.37417	0.648243	-2.11984	0.0340195	0.991134
ENSMUSG00000025584	Pde8a	18584	826.335	-0.175934	0.0822376	-2.13934	0.0324082	0.991134
ENSMUSG00000026181	Ppm1f	68606	3902.37	0.0662596	0.0311701	2.12574	0.0335247	0.991134
ENSMUSG00000027793	Ccna1	12427	39.026	0.283211	0.132456	2.13815	0.0325048	0.991134
ENSMUSG00000027952	Pmvk	68603	1416.21	0.122372	0.0574194	2.13119	0.0330734	0.991134
ENSMUSG00000028186	Uox	22262	21.2327	-0.361	0.169439	-2.13056	0.0331251	0.991134
ENSMUSG00000029306	Ibsp	15891	5.13397	0.772978	0.362674	2.13133	0.0330617	0.991134
ENSMUSG00000029389	Ddx55	67848	1355.9	-0.106454	0.0498817	-2.13413	0.0328317	0.991134
ENSMUSG00000029882	2210010C04Rik	67373	0.937855	1.69271	0.797763	2.12182	0.0338526	0.991134
ENSMUSG00000030064	Frmd4b	232288	866.985	-0.1293	0.0608767	-2.12397	0.0336725	0.991134
ENSMUSG00000030154	Klrb1f	232408	1.81211	-1.27622	0.599856	-2.12754	0.0333754	0.991134
ENSMUSG00000031725	Ces1f	234564	3.96985	0.956559	0.450804	2.1219	0.0338464	0.991134
ENSMUSG00000031779	Ccl22	20299	8.11121	-0.559225	0.262276	-2.1322	0.0329902	0.991134
ENSMUSG00000032077	Bud13	215051	420.013	0.100004	0.047162	2.12044	0.0339691	0.991134
ENSMUSG00000032854	Ugt8a	22239	2181.41	-0.282907	0.132571	-2.134	0.0328429	0.991134
ENSMUSG00000033948	Zswim5	74464	784.706	-0.10024	0.0472633	-2.12089	0.0339312	0.991134
ENSMUSG00000035919	Bbs9	319845	691.15	0.102302	0.048165	2.12399	0.0336706	0.991134
ENSMUSG00000036169	Sostdc1	66042	141.657	-0.530957	0.249136	-2.13119	0.0330734	0.991134
ENSMUSG00000036402	Gng12	14701	2208.56	-0.096253	0.0450181	-2.13809	0.0325091	0.991134
ENSMUSG00000039179	Tekt5	70426	436.62	0.175096	0.0819501	2.13661	0.0326293	0.991134
ENSMUSG00000040632	Nrl	18185	25.5016	0.354346	0.166903	2.12306	0.0337488	0.991134
ENSMUSG00000053979	A730045E13Rik	208924	0.8387	-1.7451	0.819753	-2.12881	0.0332701	0.991134
ENSMUSG00000054556	Gm4876	232599	83.01	0.256442	0.120718	2.1243	0.0336452	0.991134
ENSMUSG00000055305	Zfp93	22755	353.927	-0.102753	0.048216	-2.1311	0.0330806	0.991134
ENSMUSG00000058420	Syt17	110058	1089.49	0.207982	0.0977251	2.12823	0.033318	0.991134
ENSMUSG00000065435	Mir135b	723818	2.65062	-0.996571	0.468559	-2.12689	0.0334296	0.991134
ENSMUSG00000080895	Gm11645	668916	10.3045	0.440634	0.207715	2.12134	0.0338931	0.991134
ENSMUSG00000084371	Gm14113	668920	11.1934	0.600293	0.281742	2.13065	0.0331179	0.991134
ENSMUSG00000085232	Gm11962	382478	13.0437	-0.418461	0.196449	-2.13013	0.0331609	0.991134
ENSMUSG00000086782	E130102H24Rik	77866	180.776	-0.187437	0.0875879	-2.13998	0.0323561	0.991134
ENSMUSG00000091163	Gm3962	100042681	15.0634	-0.420948	0.197331	-2.13321	0.0329074	0.991134
ENSMUSG00000094083	Gm1604a	100040822	35.3882	-0.274848	0.129656	-2.11983	0.0340208	0.991134
ENSMUSG00000094185	Gm5445	432725	1.12327	1.56173	0.733365	2.12954	0.0332097	0.991134
ENSMUSG00000096052	9930004E17Rik	654819	12.6761	-0.417738	0.196932	-2.12123	0.0339025	0.991134
ENSMUSG00000096140	Ankrd66	100043332	18.5316	-0.431397	0.20213	-2.13425	0.0328223	0.991134
ENSMUSG00000096995	2810029C07Rik	100504687	318.514	-0.269711	0.126615	-2.13016	0.0331588	0.991134
ENSMUSG00000103261	Gm36981	105244476	2.32312	0.979344	0.458988	2.1337	0.0328673	0.991134
ENSMUSG00000103520	1110025M09Rik	68635	36.8098	-0.258624	0.121142	-2.13489	0.0327703	0.991134
ENSMUSG00000031286	Glt28d2	320302	22.4651	0.33195	0.156684	2.1186	0.0341245	0.991589
ENSMUSG00000001542	Ell2	192657	1256.39	-0.130103	0.0614396	-2.11757	0.0342114	0.992059
ENSMUSG00000048100	Taf13	99730	891.07	-0.139776	0.0660058	-2.11763	0.0342063	0.992059
ENSMUSG00000009394	Syn2	20965	22203.7	0.128423	0.0606931	2.11593	0.0343506	0.995066
ENSMUSG00000083368	Gm13214	100039835	3.65609	0.962644	0.455176	2.11489	0.0344397	0.995066
ENSMUSG00000084927	Gm5724	435927	0.752082	-1.79151	0.847174	-2.11468	0.0344569	0.995066
ENSMUSG00000022372	Sla	20491	351.863	0.134675	0.0637272	2.1133	0.0345754	0.997464
ENSMUSG00000000290	Itgb2	16414	235.015	0.280513	0.132953	2.10986	0.03487	0.999047
ENSMUSG00000022479	Vdr	22337	33.2204	0.410413	0.195178	2.10276	0.0354871	0.999047
ENSMUSG00000024764	Naa40	70999	1739.66	-0.0940583	0.0446895	-2.10471	0.0353169	0.999047
ENSMUSG00000024827	Gldc	104174	885.266	-0.123839	0.0587445	-2.1081	0.0350226	0.999047
ENSMUSG00000026456	Cyb5r1	72017	868.914	0.146691	0.0695709	2.10851	0.0349869	0.999047
ENSMUSG00000028248	Pnisr	66625	11042.1	-0.118609	0.0563621	-2.10442	0.035342	0.999047
ENSMUSG00000032680	6820408C15Rik	228778	127.072	-0.153548	0.0727655	-2.11017	0.0348433	0.999047
ENSMUSG00000037007	Zfp113	56314	462.895	-0.113808	0.0540824	-2.10435	0.0353481	0.999047
ENSMUSG00000041921	Metap1d	66559	736.854	-0.336401	0.159286	-2.11193	0.0346925	0.999047
ENSMUSG00000044030	Irf2bp1	272359	1727.32	0.169029	0.0802276	2.10687	0.0351289	0.999047
ENSMUSG00000050468	Astl	215095	0.995768	1.70029	0.80798	2.10437	0.0353458	0.999047
ENSMUSG00000052273	Dnah3	381917	96.6592	-0.367685	0.174684	-2.10486	0.0353036	0.999047
ENSMUSG00000053153	Spag16	66722	40.1092	-0.416741	0.19755	-2.10955	0.0348972	0.999047
ENSMUSG00000054545	Ugt1a6a	94284	2.36436	1.05898	0.501494	2.11165	0.0347163	0.999047
ENSMUSG00000055639	Dach1	13134	607.198	-0.269894	0.128177	-2.10563	0.0352364	0.999047
ENSMUSG00000056643	Chst13	71797	1.93745	1.22449	0.580921	2.10785	0.0350438	0.999047
ENSMUSG00000068220	Lgals1	16852	438.011	0.262827	0.12475	2.10683	0.0351323	0.999047
ENSMUSG00000074646	6430550D23Rik	320095	94.6825	-0.202229	0.0960206	-2.1061	0.0351954	0.999047
ENSMUSG00000081494	Gm14130	667048	35.5152	0.522113	0.248267	2.10303	0.0354635	0.999047
ENSMUSG00000085377	4930551L18Rik	75261	2.2999	-1.04263	0.495855	-2.10268	0.0354935	0.999047
ENSMUSG00000000001	Gnai3	14679	1500.52	-0.0297509	0.0504094	-0.590186	0.555066	0.999886
ENSMUSG00000000028	Cdc45	12544	60.9593	0.0760217	0.0918666	0.827523	0.407941	0.999886
ENSMUSG00000000031	H19	14955	10.7626	0.188491	0.33702	0.559288	0.575965	0.999886
ENSMUSG00000000037	Scml2	107815	93.9027	0.0120651	0.121084	0.099642	0.920629	0.999886
ENSMUSG00000000049	Apoh	11818	11.9619	0.212571	0.220659	0.963347	0.335373	0.999886
ENSMUSG00000000056	Narf	67608	2160.2	0.0673764	0.0454712	1.48174	0.13841	0.999886
ENSMUSG00000000058	Cav2	12390	1399.14	0.146936	0.110818	1.32592	0.184867	0.999886
ENSMUSG00000000078	Klf6	23849	1935.63	0.0134048	0.0579693	0.231239	0.817129	0.999886
ENSMUSG00000000085	Scmh1	29871	1997.16	0.00686711	0.0453504	0.151423	0.879642	0.999886
ENSMUSG00000000088	Cox5a	12858	1977.23	0.0190116	0.0544116	0.349403	0.726787	0.999886
ENSMUSG00000000093	Tbx2	21385	66.3086	-0.0420664	0.122636	-0.343019	0.731584	0.999886
ENSMUSG00000000094	Tbx4	21387	6.17187	0.202883	0.280298	0.723811	0.469182	0.999886
ENSMUSG00000000120	Ngfr	18053	199.93	-0.188479	0.106377	-1.77179	0.0764289	0.999886
ENSMUSG00000000125	Wnt3	22415	161.694	0.0919657	0.132941	0.69178	0.489076	0.999886
ENSMUSG00000000126	Wnt9a	216795	566.661	-0.114688	0.109422	-1.04813	0.29458	0.999886
ENSMUSG00000000127	Fer	14158	578.368	-0.0308436	0.0601472	-0.512802	0.60809	0.999886
ENSMUSG00000000131	Xpo6	74204	4237.03	0.00894386	0.0400893	0.223098	0.823459	0.999886
ENSMUSG00000000134	Tfe3	209446	1685.7	0.019491	0.0390376	0.499286	0.617578	0.999886
ENSMUSG00000000142	Axin2	12006	1009.14	-0.0112983	0.0520396	-0.21711	0.828123	0.999886
ENSMUSG00000000148	Brat1	231841	1009.2	-0.0342753	0.0426255	-0.804103	0.421338	0.999886
ENSMUSG00000000149	Gna12	14673	2970.57	-0.051675	0.0748158	-0.690695	0.489757	0.999886
ENSMUSG00000000154	Slc22a18	18400	31.8678	0.225794	0.185218	1.21907	0.222818	0.999886
ENSMUSG00000000157	Itgb2l	16415	4.07518	0.2293	0.383714	0.597582	0.550119	0.999886
ENSMUSG00000000159	Igsf5	72058	11.6407	-0.209916	0.210522	-0.997123	0.318705	0.999886
ENSMUSG00000000167	Pih1d2	72614	115.571	-0.119102	0.0920335	-1.29411	0.195627	0.999886
ENSMUSG00000000168	Dlat	235339	3939.7	-0.0127341	0.0430118	-0.29606	0.767184	0.999886
ENSMUSG00000000171	Sdhd	66925	2656.94	0.0139326	0.0460683	0.302434	0.762322	0.999886
ENSMUSG00000000182	Fgf23	64654	14.9901	-0.250818	0.197515	-1.26987	0.204132	0.999886
ENSMUSG00000000184	Ccnd2	12444	2350.78	-0.082667	0.0809419	-1.02131	0.307106	0.999886
ENSMUSG00000000194	Gpr107	277463	2617.05	-0.00656565	0.0318214	-0.206328	0.836535	0.999886
ENSMUSG00000000197	Nalcn	338370	5073.66	0.0127715	0.0616387	0.2072	0.835854	0.999886
ENSMUSG00000000214	Th	21823	513.999	0.178783	0.19229	0.929756	0.352498	0.999886
ENSMUSG00000000215	Ins2	16334	3.05585	-0.799506	0.400338	-1.99708	0.0458169	0.999886
ENSMUSG00000000216	Scnn1g	20278	8.51766	-0.0678902	0.244011	-0.278226	0.780839	0.999886
ENSMUSG00000000223	Drp2	13497	4113.64	-0.0596061	0.0384948	-1.54842	0.121521	0.999886
ENSMUSG00000000244	Tspan32	27027	13.7149	0.356698	0.252444	1.41298	0.157662	0.999886
ENSMUSG00000000247	Lhx2	16870	1683.33	-0.0586911	0.065413	-0.89724	0.369591	0.999886
ENSMUSG00000000253	Gmpr	66355	1526.59	0.0493792	0.0574784	0.859092	0.39029	0.999886
ENSMUSG00000000263	Glra1	14654	163.583	0.234403	0.245137	0.956214	0.338964	0.999886
ENSMUSG00000000266	Mid2	23947	1402.32	0.0661032	0.0601256	1.09942	0.271585	0.999886
ENSMUSG00000000275	Trim25	217069	329.183	-0.0124359	0.0807852	-0.153938	0.877659	0.999886
ENSMUSG00000000276	Dgke	56077	4241.06	0.00829514	0.0505099	0.164228	0.869552	0.999886
ENSMUSG00000000278	Scpep1	74617	593.6	0.0763308	0.0472863	1.61423	0.106478	0.999886
ENSMUSG00000000282	Mnt	17428	1905.29	0.108986	0.0637739	1.70894	0.0874615	0.999886
ENSMUSG00000000295	Hddc2	69692	403.145	-0.000122461	0.0727345	-0.00168367	0.998657	0.999886
ENSMUSG00000000296	Tpd52l1	21987	784.096	-0.0122545	0.0541201	-0.226431	0.820866	0.999886
ENSMUSG00000000301	Pemt	18618	103.464	0.143328	0.120176	1.19265	0.233005	0.999886
ENSMUSG00000000303	Cdh1	12550	136.863	-0.152032	0.290145	-0.523987	0.600288	0.999886
ENSMUSG00000000305	Cdh4	12561	1221.04	0.0458893	0.0617459	0.743195	0.457364	0.999886
ENSMUSG00000000308	Ckmt1	12716	8167.78	0.115926	0.0708669	1.63583	0.101875	0.999886
ENSMUSG00000000317	Bcl6b	12029	66.1496	0.0612855	0.132897	0.461152	0.644689	0.999886
ENSMUSG00000000318	Clec10a	17312	26.5054	0.196236	0.216885	0.904793	0.365575	0.999886
ENSMUSG00000000320	Alox12	11684	32.26	-0.323177	0.171952	-1.87946	0.0601823	0.999886
ENSMUSG00000000325	Arvcf	11877	1634.94	0.0660772	0.0515438	1.28196	0.199856	0.999886
ENSMUSG00000000326	Comt	12846	2033.25	0.0421976	0.0796586	0.529731	0.596298	0.999886
ENSMUSG00000000339	Rtca	66368	948.117	-0.000853971	0.0534097	-0.0159891	0.987243	0.999886
ENSMUSG00000000346	Dazap2	23994	4480.83	-0.0161946	0.0357806	-0.452607	0.650832	0.999886
ENSMUSG00000000355	Mcts1	68995	1507.91	-0.0436171	0.0610777	-0.714126	0.475149	0.999886
ENSMUSG00000000359	Rem1	19700	18.4332	-0.299392	0.196335	-1.5249	0.127283	0.999886
ENSMUSG00000000365	Rnf17	30054	23.9659	0.476084	0.301038	1.58148	0.113769	0.999886
ENSMUSG00000000374	Trappc10	216131	4506.83	0.0111811	0.0457407	0.244446	0.806885	0.999886
ENSMUSG00000000378	Ccm2	216527	1518.05	0.0521443	0.137333	0.379693	0.704174	0.999886
ENSMUSG00000000381	Wap	22373	1.40888	-0.936234	0.635223	-1.47387	0.140518	0.999886
ENSMUSG00000000384	Tbrg4	21379	1309.11	0.0362362	0.0486051	0.745523	0.455956	0.999886
ENSMUSG00000000385	Tmprss2	50528	3.29588	-0.50726	0.401763	-1.26259	0.206738	0.999886
ENSMUSG00000000386	Mx1	17857	24.3114	0.329669	0.234796	1.40407	0.160299	0.999886
ENSMUSG00000000392	Fap	14089	112.696	-0.194637	0.123212	-1.57968	0.114179	0.999886
ENSMUSG00000000394	Gcg	14526	3.1362	-0.421227	0.415442	-1.01392	0.310619	0.999886
ENSMUSG00000000399	Ndufa9	66108	3419.03	0.0384128	0.0550392	0.697917	0.485229	0.999886
ENSMUSG00000000402	Egfl6	54156	68.7359	-0.105032	0.133101	-0.789117	0.430043	0.999886
ENSMUSG00000000409	Lck	16818	70.4453	0.122742	0.110359	1.11221	0.266049	0.999886
ENSMUSG00000000411	Tssk3	58864	7.97157	-0.186106	0.256684	-0.72504	0.468428	0.999886
ENSMUSG00000000416	Cttnbp2	30785	5384.4	-0.0952311	0.0526969	-1.80715	0.0707395	0.999886
ENSMUSG00000000420	Galnt1	14423	2035.81	-0.000830072	0.0484819	-0.0171213	0.98634	0.999886
ENSMUSG00000000439	Mkrn2	67027	831.086	0.0876355	0.043594	2.01027	0.0444029	0.999886
ENSMUSG00000000440	Pparg	19016	127.242	0.00312273	0.0993456	0.031433	0.974924	0.999886
ENSMUSG00000000441	Raf1	110157	3575.98	-0.00959881	0.0239638	-0.400555	0.688748	0.999886
ENSMUSG00000000486	2021-09-01	54204	31.6381	0.0754605	0.173003	0.436181	0.662705	0.999886
ENSMUSG00000000489	Pdgfb	18591	888.104	0.100766	0.0768293	1.31155	0.189671	0.999886
ENSMUSG00000000530	Acvrl1	11482	439.438	-0.105501	0.105427	-1.0007	0.316973	0.999886
ENSMUSG00000000531	Grasp	56149	1350.45	0.0112458	0.0733628	0.15329	0.87817	0.999886
ENSMUSG00000000532	Acvr1b	11479	5675.53	0.00296293	0.0526762	0.0562481	0.955144	0.999886
ENSMUSG00000000538	Tom1l2	216810	12493.1	0.0302863	0.0475911	0.636385	0.524526	0.999886
ENSMUSG00000000552	Zfp385a	29813	2894.77	0.0564982	0.0808937	0.698426	0.484911	0.999886
ENSMUSG00000000555	Itga5	16402	275.504	-0.00795771	0.106711	-0.0745723	0.940555	0.999886
ENSMUSG00000000560	Gabra2	14395	2862.4	0.0309983	0.0716463	0.432657	0.665264	0.999886
ENSMUSG00000000561	Wdr77	70465	2271.52	0.0159071	0.0257502	0.617748	0.536742	0.999886
ENSMUSG00000000562	Adora3	11542	38.0425	0.207231	0.144446	1.43466	0.151384	0.999886
ENSMUSG00000000567	Sox9	20682	1342.08	-0.0399459	0.0755151	-0.528979	0.59682	0.999886
ENSMUSG00000000568	Hnrnpd	11991	5106.39	-0.0033825	0.0478024	-0.07076	0.943589	0.999886
ENSMUSG00000000579	Dynlt1c	100040563	227.369	0.0348073	0.186938	0.186197	0.85229	0.999886
ENSMUSG00000000581	C1d	57316	1774.99	-0.0350392	0.0809219	-0.433001	0.665014	0.999886
ENSMUSG00000000594	Gm2a	14667	2223.82	-0.0769307	0.0460894	-1.66916	0.0950854	0.999886
ENSMUSG00000000600	Krit1	79264	2012.6	-0.0440048	0.0536667	-0.819965	0.412236	0.999886
ENSMUSG00000000605	Clcn4	12727	8131.21	-0.0381352	0.0386667	-0.986254	0.324009	0.999886
ENSMUSG00000000617	Grm6	108072	0.976349	0.375129	0.63135	0.59417	0.552399	0.999886
ENSMUSG00000000627	Sema4f	20355	2238.24	0.0365922	0.0595867	0.6141	0.539149	0.999886
ENSMUSG00000000628	Hk2	15277	195.106	0.0823196	0.0785398	1.04813	0.29458	0.999886
ENSMUSG00000000631	Myo18a	360013	9546.23	-0.0333011	0.0566863	-0.587463	0.556893	0.999886
ENSMUSG00000000632	Sez6	20370	8572.87	-0.00419656	0.0528686	-0.0793772	0.936733	0.999886
ENSMUSG00000000673	Haao	107766	13.012	0.347079	0.281026	1.23504	0.216815	0.999886
ENSMUSG00000000686	Abhd15	67477	19.653	0.19012	0.17726	1.07255	0.283473	0.999886
ENSMUSG00000000690	Hoxb6	15414	0.692701	-0.196833	1.04839	-0.187747	0.851075	0.999886
ENSMUSG00000000693	Loxl3	16950	173.354	-0.0400741	0.0724043	-0.553477	0.579937	0.999886
ENSMUSG00000000706	Btn1a1	12231	6.52105	0.0486855	0.298767	0.162955	0.870554	0.999886
ENSMUSG00000000708	Kat2b	18519	1121.54	-0.0287308	0.06511	-0.441265	0.659021	0.999886
ENSMUSG00000000711	Rab5b	19344	6264.67	0.0571434	0.0327471	1.74499	0.0809866	0.999886
ENSMUSG00000000724	Cryba1	12957	7.78725	0.144085	0.309467	0.46559	0.641509	0.999886
ENSMUSG00000000730	Dnmt3l	54427	7.37881	0.383707	0.288791	1.32867	0.183958	0.999886
ENSMUSG00000000731	Aire	11634	13.2063	0.120422	0.237666	0.506685	0.612376	0.999886
ENSMUSG00000000738	Spg7	234847	2323.93	0.0175953	0.0480386	0.366275	0.71416	0.999886
ENSMUSG00000000739	Sult5a1	57429	11.4136	0.0184756	0.222959	0.0828657	0.933958	0.999886
ENSMUSG00000000740	Rpl13	270106	702.507	-0.0243547	0.0921427	-0.264315	0.791537	0.999886
ENSMUSG00000000743	Chmp1a	234852	3853.58	0.0405477	0.0605974	0.669131	0.503412	0.999886
ENSMUSG00000000751	Rpa1	68275	2094.94	0.0545722	0.0367108	1.48654	0.137135	0.999886
ENSMUSG00000000753	Serpinf1	20317	391.381	0.124859	0.126882	0.984057	0.325087	0.999886
ENSMUSG00000000759	Tubgcp3	259279	2082.82	-0.0195671	0.0248309	-0.788014	0.430689	0.999886
ENSMUSG00000000766	Oprm1	18390	105.932	0.0531369	0.168554	0.315251	0.752571	0.999886
ENSMUSG00000000776	Polr3d	67065	731.744	0.0190277	0.040697	0.467545	0.64011	0.999886
ENSMUSG00000000782	Tcf7	21414	173.092	-0.1499	0.0806897	-1.85773	0.063207	0.999886
ENSMUSG00000000787	Ddx3x	13205	11792.2	-0.0117758	0.102523	-0.11486	0.908556	0.999886
ENSMUSG00000000791	Il12rb1	16161	47.8836	0.428444	0.21331	2.00855	0.0445851	0.999886
ENSMUSG00000000792	Slc5a5	114479	553.181	-0.0621047	0.204452	-0.303762	0.761309	0.999886
ENSMUSG00000000794	Kcnn3	140493	1002.52	0.00666278	0.0758661	0.0878229	0.930017	0.999886
ENSMUSG00000000804	Usp32	237898	7464.05	0.00405363	0.0596344	0.0679747	0.945806	0.999886
ENSMUSG00000000805	Car4	12351	1000.73	-0.157362	0.0788113	-1.99669	0.0458583	0.999886
ENSMUSG00000000811	Txnrd3	232223	233.187	0.0446655	0.0776448	0.575254	0.565119	0.999886
ENSMUSG00000000817	Fasl	14103	14.271	0.401161	0.231528	1.73267	0.0831545	0.999886
ENSMUSG00000000823	Zfp512b	269401	3434.36	-0.0235223	0.0555961	-0.423093	0.672227	0.999886
ENSMUSG00000000826	Dnajc5	13002	16970.9	0.0401923	0.0399203	1.00681	0.314024	0.999886
ENSMUSG00000000827	Tpd52l2	66314	2111.7	-0.00985047	0.0450176	-0.218814	0.826795	0.999886
ENSMUSG00000000838	Fmr1	14265	3459.73	-0.0901079	0.0561811	-1.60388	0.10874	0.999886
ENSMUSG00000000861	Bcl11a	14025	3028.45	-0.00443371	0.0517664	-0.0856485	0.931746	0.999886
ENSMUSG00000000869	Il4	16189	508.847	-0.0646365	0.0572735	-1.12856	0.259085	0.999886
ENSMUSG00000000876	Pxmp4	59038	676.15	-0.0306274	0.0702594	-0.435919	0.662895	0.999886
ENSMUSG00000000881	Dlg3	53310	7615.96	-0.0152599	0.0479857	-0.318009	0.750478	0.999886
ENSMUSG00000000884	Gnb1l	13972	155.3	-0.00839824	0.0737147	-0.113929	0.909294	0.999886
ENSMUSG00000000901	Mmp11	17385	94.1351	-0.00829172	0.0988126	-0.0839136	0.933125	0.999886
ENSMUSG00000000902	Smarcb1	20587	2528.19	-0.00705132	0.0423759	-0.166399	0.867843	0.999886
ENSMUSG00000000903	Vpreb3	22364	4.00367	0.482581	0.361785	1.33389	0.182241	0.999886
ENSMUSG00000000915	Hip1r	29816	3774.71	-0.0283857	0.0482264	-0.588591	0.556135	0.999886
ENSMUSG00000000916	Nsun5	100609	497.025	-0.0385121	0.0632904	-0.608498	0.542857	0.999886
ENSMUSG00000000934	Top1mt	72960	556.52	0.065676	0.0479092	1.37084	0.170424	0.999886
ENSMUSG00000000942	Hoxa4	15401	0.746841	1.26046	1.33798	0.942063	0.346161	0.999886
ENSMUSG00000000957	Mmp14	17387	398.169	-0.0650295	0.110741	-0.587221	0.557055	0.999886
ENSMUSG00000000958	Slc7a7	20540	81.7522	0.103919	0.0923709	1.12502	0.26058	0.999886
ENSMUSG00000000959	Oxa1l	69089	1615.08	0.0813984	0.0610928	1.33237	0.182738	0.999886
ENSMUSG00000000976	Heatr6	217026	1074.25	0.00212855	0.0396503	0.053683	0.957188	0.999886
ENSMUSG00000000983	Wfdc18	14038	22.7835	0.379456	0.236335	1.60559	0.108365	0.999886
ENSMUSG00000001016	Ilf2	67781	2473.91	0.0422656	0.0349007	1.21102	0.225886	0.999886
ENSMUSG00000001017	Chtop	66511	5724.23	-0.0226188	0.028451	-0.795009	0.426609	0.999886
ENSMUSG00000001018	Snapin	20615	1623.83	-0.000400252	0.0444598	-0.00900257	0.992817	0.999886
ENSMUSG00000001020	S100a4	20198	65.3619	0.128673	0.220382	0.583863	0.559313	0.999886
ENSMUSG00000001021	S100a3	20197	14.88	-0.153385	0.23061	-0.66513	0.505968	0.999886
ENSMUSG00000001023	S100a5	20199	52.1825	0.0574273	0.855383	0.0671364	0.946473	0.999886
ENSMUSG00000001025	S100a6	20200	557.978	0.185325	0.133902	1.38403	0.166348	0.999886
ENSMUSG00000001027	Scn4a	110880	2.18552	0.925799	0.508934	1.81909	0.0688971	0.999886
ENSMUSG00000001029	Icam2	15896	58.2053	0.0398396	0.128576	0.309852	0.756674	0.999886
ENSMUSG00000001034	Mapk7	23939	865.534	-0.00229114	0.062389	-0.0367235	0.970705	0.999886
ENSMUSG00000001036	Epn2	13855	5421.3	-0.0269152	0.0243651	-1.10467	0.269305	0.999886
ENSMUSG00000001039	B9d1	27078	460.769	-0.0388599	0.0516536	-0.752317	0.45186	0.999886
ENSMUSG00000001052	Sec24b	99683	2844.12	0.0338465	0.0295496	1.14541	0.252038	0.999886
ENSMUSG00000001053	N4bp3	212706	537.612	0.067827	0.078167	0.86772	0.385548	0.999886
ENSMUSG00000001054	Rmnd5b	66089	1674.36	0.0844118	0.0619738	1.36206	0.17318	0.999886
ENSMUSG00000001056	Nhp2	52530	959.588	0.0445436	0.0859653	0.518158	0.604348	0.999886
ENSMUSG00000001062	Vps9d1	72325	2508.27	0.0118696	0.0701325	0.169245	0.865604	0.999886
ENSMUSG00000001065	Zfp276	57247	674.914	0.0407896	0.063613	0.641215	0.521383	0.999886
ENSMUSG00000001082	Mfsd10	68294	803.755	0.00860237	0.0720146	0.119453	0.904916	0.999886
ENSMUSG00000001089	Luzp1	269593	4385.08	0.00583616	0.0659747	0.0884606	0.929511	0.999886
ENSMUSG00000001098	Kctd10	330171	842.599	0.015362	0.0698639	0.219885	0.825961	0.999886
ENSMUSG00000001100	Poldip2	67811	3432.33	0.0315494	0.0434099	0.726778	0.467362	0.999886
ENSMUSG00000001103	Sebox	18292	75.7613	0.0961533	0.112411	0.855375	0.392344	0.999886
ENSMUSG00000001105	Ift20	55978	1919.75	-0.00108194	0.0603648	-0.0179233	0.9857	0.999886
ENSMUSG00000001120	Pcbp3	59093	2050.56	-0.00616825	0.0647376	-0.0952808	0.924092	0.999886
ENSMUSG00000001123	Lgals9	16859	187.478	0.0915474	0.102104	0.896607	0.369929	0.999886
ENSMUSG00000001127	Araf	11836	6465.92	0.0181806	0.0310645	0.585255	0.558376	0.999886
ENSMUSG00000001128	Cfp	18636	603.221	0.0316843	0.114527	0.276654	0.782046	0.999886
ENSMUSG00000001131	Timp1	21857	84.4792	0.00445183	0.149521	0.029774	0.976247	0.999886
ENSMUSG00000001134	Uxt	22294	119.333	0.0860988	0.0825226	1.04334	0.296793	0.999886
ENSMUSG00000001138	Cnnm3	94218	1479.7	0.0405833	0.0421666	0.962453	0.335822	0.999886
ENSMUSG00000001143	Lman2l	214895	1894.06	-0.0183852	0.0487806	-0.376895	0.706251	0.999886
ENSMUSG00000001150	Mcm3ap	54387	2748.39	0.0206296	0.0357518	0.577024	0.563923	0.999886
ENSMUSG00000001151	Pcnt	18541	1888.17	0.0165287	0.0685465	0.241131	0.809454	0.999886
ENSMUSG00000001155	Ftcd	14317	6.02652	-0.0487437	0.281569	-0.173114	0.862562	0.999886
ENSMUSG00000001156	Mxd1	17119	1088.67	-0.00623688	0.0496944	-0.125505	0.900124	0.999886
ENSMUSG00000001157	Gmcl1	23885	1460.35	-0.00598395	0.0292477	-0.204595	0.837888	0.999886
ENSMUSG00000001158	Snrnp27	66618	1086.47	-0.0478409	0.0670848	-0.71314	0.475759	0.999886
ENSMUSG00000001166	Oas1c	114643	58.075	0.105563	0.121588	0.868198	0.385286	0.999886
ENSMUSG00000001168	Oas1h	246729	1.06306	-0.112515	0.819836	-0.13724	0.890841	0.999886
ENSMUSG00000001173	Ocrl	320634	3616.75	0.0247003	0.0389363	0.634377	0.525835	0.999886
ENSMUSG00000001175	Calm1	12313	83647.3	0.0239819	0.0549222	0.436652	0.662364	0.999886
ENSMUSG00000001211	Agpat3	28169	10742.1	-0.0313488	0.0317721	-0.986675	0.323802	0.999886
ENSMUSG00000001225	Slc26a3	13487	7.86171	-0.224675	0.29857	-0.752503	0.451749	0.999886
ENSMUSG00000001227	Sema6b	20359	5536.72	0.0272273	0.0653202	0.416829	0.676803	0.999886
ENSMUSG00000001228	Uhrf1	18140	44.6943	-0.143205	0.104622	-1.36878	0.171068	0.999886
ENSMUSG00000001229	Dpp9	224897	2750.2	-0.0189552	0.0604596	-0.313518	0.753887	0.999886
ENSMUSG00000001240	Ramp2	54409	368.544	0.0918684	0.106379	0.863599	0.387808	0.999886
ENSMUSG00000001247	Lsr	54135	71.3878	-0.224234	0.128354	-1.747	0.0806365	0.999886
ENSMUSG00000001248	Gramd1a	52857	4900.47	0.0157413	0.0599201	0.262704	0.792779	0.999886
ENSMUSG00000001249	Hpn	15451	95.5515	-0.0104797	0.122407	-0.085613	0.931774	0.999886
ENSMUSG00000001260	Gabrg1	14405	1543.29	-0.0414357	0.0815743	-0.50795	0.611488	0.999886
ENSMUSG00000001270	Ckb	12709	40440.8	-0.00117414	0.0701836	-0.0167296	0.986652	0.999886
ENSMUSG00000001280	Sp1	20683	1342.19	-0.032693	0.0607204	-0.538419	0.590288	0.999886
ENSMUSG00000001281	Itgb7	16421	40.431	0.225841	0.14694	1.53696	0.124304	0.999886
ENSMUSG00000001285	Myg1	60315	888.568	0.0865286	0.0554298	1.56105	0.118512	0.999886
ENSMUSG00000001288	Rarg	19411	507.635	0.0342471	0.0629372	0.544147	0.58634	0.999886
ENSMUSG00000001289	Pfdn5	56612	4387.8	0.000576471	0.0752027	0.00766557	0.993884	0.999886
ENSMUSG00000001300	Efnb2	13642	2312.06	0.0297194	0.0494905	0.600507	0.548168	0.999886
ENSMUSG00000001305	Rrp15	67223	401.838	-0.0429562	0.0464779	-0.924228	0.355368	0.999886
ENSMUSG00000001313	Rnd2	11858	4795.69	0.0676135	0.0904378	0.747625	0.454687	0.999886
ENSMUSG00000001323	Srr	27364	1567.13	-0.0643992	0.0602269	-1.06928	0.284945	0.999886
ENSMUSG00000001333	Sync	68828	42.3052	0.170861	0.115369	1.481	0.138608	0.999886
ENSMUSG00000001334	Fndc5	384061	3324.66	-0.00254884	0.0521439	-0.0488809	0.961014	0.999886
ENSMUSG00000001348	Acp5	11433	15.0279	0.13529	0.261538	0.517288	0.604955	0.999886
ENSMUSG00000001349	Cnn1	12797	19.1534	0.0452203	0.154625	0.292452	0.769941	0.999886
ENSMUSG00000001366	Fbxo9	71538	3545.7	0.0360547	0.0485275	0.742975	0.457497	0.999886
ENSMUSG00000001376	Vps50	73288	2898.8	-0.00484688	0.0552624	-0.0877067	0.93011	0.999886
ENSMUSG00000001380	Hars	15115	3209.02	0.0639413	0.0430994	1.48358	0.137922	0.999886
ENSMUSG00000001383	Zmat2	66492	6807.78	-0.0217838	0.0501986	-0.433951	0.664324	0.999886
ENSMUSG00000001403	Ube2c	68612	12.6121	0.151321	0.229674	0.658852	0.509991	0.999886
ENSMUSG00000001415	Smg5	229512	4622.13	0.0369933	0.0361968	1.022	0.306779	0.999886
ENSMUSG00000001416	Cct3	12462	4476.21	0.0598602	0.0466056	1.2844	0.199003	0.999886
ENSMUSG00000001418	Glmp	56700	1310.1	0.0827245	0.056557	1.46267	0.143556	0.999886
ENSMUSG00000001419	Mef2d	17261	8582.95	0.0613042	0.0632083	0.969877	0.332108	0.999886
ENSMUSG00000001420	Tmem79	71913	30.862	0.00522467	0.126214	0.0413952	0.966981	0.999886
ENSMUSG00000001424	Snd1	56463	3091.69	0.0502731	0.0529815	0.94888	0.342681	0.999886
ENSMUSG00000001435	Col18a1	12822	341.341	0.0970611	0.111508	0.870441	0.38406	0.999886
ENSMUSG00000001436	Slc19a1	20509	632.634	-0.021161	0.0477586	-0.443083	0.657706	0.999886
ENSMUSG00000001440	Kpnb1	16211	7529.22	0.02664	0.0422397	0.630686	0.528246	0.999886
ENSMUSG00000001441	Npepps	19155	6528.41	0.0123888	0.0409894	0.302245	0.762465	0.999886
ENSMUSG00000001444	Tbx21	57765	18.4547	0.0619416	0.517011	0.119807	0.904636	0.999886
ENSMUSG00000001445	Mrpl10	107732	1247.91	0.0660753	0.0503151	1.31323	0.189106	0.999886
ENSMUSG00000001467	Cyp51	13121	2486.15	0.0765331	0.0741254	1.03248	0.301846	0.999886
ENSMUSG00000001472	Tcf25	66855	22854.5	0.0436114	0.0478897	0.910663	0.362473	0.999886
ENSMUSG00000001473	Tubb6	67951	200.281	-0.132309	0.170592	-0.775587	0.437993	0.999886
ENSMUSG00000001482	Def8	23854	1962.35	0.0233968	0.0377261	0.620176	0.535142	0.999886
ENSMUSG00000001493	Meox1	17285	37.8944	-0.151402	0.191736	-0.789636	0.429741	0.999886
ENSMUSG00000001494	Sost	74499	6.91743	-0.384578	0.325584	-1.18119	0.237526	0.999886
ENSMUSG00000001496	Nkx2-1	21869	113.824	0.0751371	0.167666	0.448136	0.654055	0.999886
ENSMUSG00000001497	Pax9	18511	2.21109	0.0893028	0.472713	0.188915	0.850159	0.999886
ENSMUSG00000001504	Irx2	16372	115.879	0.34229	0.30031	1.13979	0.254375	0.999886
ENSMUSG00000001506	Col1a1	12842	394.961	0.141824	0.189489	0.748455	0.454186	0.999886
ENSMUSG00000001507	Itga3	16400	1261.38	0.0392951	0.0691647	0.568138	0.569941	0.999886
ENSMUSG00000001508	Sgca	20391	12.8969	-0.305981	0.208528	-1.46734	0.142284	0.999886
ENSMUSG00000001510	Dlx3	13393	3.43458	0.54489	0.400336	1.36108	0.173488	0.999886
ENSMUSG00000001517	Foxm1	14235	73.8637	0.0819035	0.10102	0.810764	0.417501	0.999886
ENSMUSG00000001518	Itfg2	101142	996.992	0.0547366	0.0429961	1.27306	0.202997	0.999886
ENSMUSG00000001521	Tulp3	22158	1063.67	-0.0487564	0.045583	-1.06962	0.284792	0.999886
ENSMUSG00000001524	Gtf2h4	14885	561.014	0.0467093	0.0645927	0.723137	0.469596	0.999886
ENSMUSG00000001525	Tubb5	22154	16301.7	0.129802	0.0739715	1.75476	0.0793012	0.999886
ENSMUSG00000001552	Jup	16480	1715.64	0.0809752	0.0773323	1.04711	0.29505	0.999886
ENSMUSG00000001555	Fkbp10	14230	196.712	-0.0484567	0.0826581	-0.58623	0.557721	0.999886
ENSMUSG00000001558	Klhl10	66720	54.491	-0.197692	0.140062	-1.41146	0.15811	0.999886
ENSMUSG00000001569	Nom1	433864	1218.08	0.00516382	0.0364224	0.141776	0.887257	0.999886
ENSMUSG00000001576	Ergic1	67458	4589.82	0.00179554	0.0434745	0.0413009	0.967056	0.999886
ENSMUSG00000001583	Tnk1	83813	7.02999	0.0338126	0.269781	0.125334	0.900259	0.999886
ENSMUSG00000001604	Tcea3	21401	20.7519	-0.301903	0.203693	-1.48215	0.138301	0.999886
ENSMUSG00000001622	Csn3	12994	0.841353	-0.39113	0.833219	-0.469421	0.638769	0.999886
ENSMUSG00000001627	Ifrd1	15982	1310.81	-0.0772734	0.0505957	-1.52727	0.126693	0.999886
ENSMUSG00000001630	Stk38l	232533	1441.32	-0.0178219	0.0308207	-0.578244	0.563099	0.999886
ENSMUSG00000001632	Brpf1	78783	1418.66	0.0527332	0.042047	1.25415	0.209789	0.999886
ENSMUSG00000001642	Akr1b3	11677	674.78	0.00869673	0.0670971	0.129614	0.896872	0.999886
ENSMUSG00000001663	Gstt1	14871	348.393	0.054178	0.074764	0.724654	0.468664	0.999886
ENSMUSG00000001665	Gstt3	103140	88.2389	0.0349516	0.118955	0.293822	0.768894	0.999886
ENSMUSG00000001666	Ddt	13202	180.037	0.113176	0.0939602	1.20451	0.228393	0.999886
ENSMUSG00000001670	Tat	234724	2.33048	-0.903029	0.476732	-1.89421	0.0581973	0.999886
ENSMUSG00000001672	Marveld3	73608	30.2029	0.105795	0.143025	0.739698	0.459483	0.999886
ENSMUSG00000001674	Ddx18	66942	722.308	0.0154685	0.048009	0.3222	0.747302	0.999886
ENSMUSG00000001687	Ubl3	24109	5958.18	-0.0669801	0.0424423	-1.57815	0.114532	0.999886
ENSMUSG00000001707	Eef1e1	66143	835.75	0.0272389	0.0686314	0.396886	0.691451	0.999886
ENSMUSG00000001729	Akt1	11651	5442.58	0.0544138	0.0606673	0.896921	0.369761	0.999886
ENSMUSG00000001739	Cldn15	60363	12.5045	0.0513744	0.218242	0.235401	0.813897	0.999886
ENSMUSG00000001741	Il16	16170	177.602	-0.0183428	0.109081	-0.168158	0.866459	0.999886
ENSMUSG00000001750	Tcirg1	27060	873.961	0.116758	0.0877804	1.33012	0.18348	0.999886
ENSMUSG00000001751	Naglu	27419	378.805	-0.0230517	0.0725137	-0.317895	0.750564	0.999886
ENSMUSG00000001755	Coasy	71743	948.712	0.012132	0.0516876	0.234718	0.814428	0.999886
ENSMUSG00000001761	Smo	319757	630.874	-0.0263345	0.0846708	-0.311022	0.755784	0.999886
ENSMUSG00000001763	Tspan33	232670	1205.68	0.0499618	0.0482429	1.03563	0.300375	0.999886
ENSMUSG00000001767	Crnkl1	66877	723.445	-0.0351752	0.0700024	-0.502486	0.615326	0.999886
ENSMUSG00000001768	Rin2	74030	1307.58	0.0213904	0.0675338	0.316736	0.751444	0.999886
ENSMUSG00000001773	Folh1	53320	440.32	-0.321942	0.205401	-1.56739	0.117025	0.999886
ENSMUSG00000001774	Chordc1	66917	2343.89	-0.0450412	0.0694768	-0.648291	0.516797	0.999886
ENSMUSG00000001785	Pwp1	103136	821.941	-0.0337152	0.0406565	-0.829269	0.406952	0.999886
ENSMUSG00000001786	Fbxo7	69754	2002.71	0.0279557	0.0297748	0.938906	0.347779	0.999886
ENSMUSG00000001794	Capns1	12336	5511.77	0.0939035	0.0633099	1.48324	0.138012	0.999886
ENSMUSG00000001802	Lrp3	435965	2721.61	0.00300766	0.0551122	0.0545735	0.956478	0.999886
ENSMUSG00000001815	Evx2	14029	5.48881	1.06485	0.815567	1.30565	0.191671	0.999886
ENSMUSG00000001829	Clpb	20480	1913.13	0.0516251	0.0419498	1.23064	0.218458	0.999886
ENSMUSG00000001833	2021-09-07	235072	15632.1	-0.0602086	0.0700946	-0.858962	0.390362	0.999886
ENSMUSG00000001844	Zdhhc4	72881	873.232	0.0302926	0.0525274	0.576701	0.564141	0.999886
ENSMUSG00000001847	Rac1	19353	11094	0.0143664	0.0373769	0.384367	0.700707	0.999886
ENSMUSG00000001855	Nup214	227720	1667.27	-0.0166845	0.0519591	-0.321109	0.748128	0.999886
ENSMUSG00000001864	Aif1l	108897	318.009	-0.038912	0.0896223	-0.434178	0.664159	0.999886
ENSMUSG00000001865	Cpa3	12873	2.04817	-0.590291	0.481393	-1.22621	0.220118	0.999886
ENSMUSG00000001870	Ltbp1	268977	347.813	-0.0663657	0.0618752	-1.07257	0.283463	0.999886
ENSMUSG00000001891	Ugp2	216558	3038.66	-0.0483849	0.0607038	-0.797066	0.425413	0.999886
ENSMUSG00000001901	Kcnh6	192775	189.923	0.0857961	0.0665721	1.28877	0.197478	0.999886
ENSMUSG00000001909	Trmt1	212528	3033.25	-0.012389	0.0537276	-0.23059	0.817634	0.999886
ENSMUSG00000001910	Nacc1	66830	4940.46	0.0314559	0.052757	0.596241	0.551015	0.999886
ENSMUSG00000001911	Nfix	18032	8088.88	-0.11312	0.0672005	-1.68332	0.0923141	0.999886
ENSMUSG00000001918	Slc1a5	20514	154.777	0.150178	0.119762	1.25398	0.209851	0.999886
ENSMUSG00000001924	Uba1	22201	13200	0.0781524	0.0746214	1.04732	0.294952	0.999886
ENSMUSG00000001942	Siae	22619	793.538	-0.0628798	0.0645532	-0.974077	0.330018	0.999886
ENSMUSG00000001943	Vsig2	57276	401.404	-0.0381284	0.0782064	-0.487536	0.625879	0.999886
ENSMUSG00000001946	Esam	69524	472.572	0.0237122	0.0888273	0.266948	0.789509	0.999886
ENSMUSG00000001948	Spa17	20686	87.7361	-0.070355	0.103458	-0.680036	0.496482	0.999886
ENSMUSG00000001962	Fam50a	108160	935.705	-0.0365769	0.0494415	-0.739801	0.459421	0.999886
ENSMUSG00000001964	Emd	13726	1262.08	0.0328438	0.0412989	0.79527	0.426457	0.999886
ENSMUSG00000001983	Taco1	70207	321.234	0.0421895	0.0631509	0.668074	0.504087	0.999886
ENSMUSG00000001985	Grik3	14807	5262.62	-0.00115381	0.0762442	-0.0151331	0.987926	0.999886
ENSMUSG00000001986	Gria3	53623	9772.12	-0.0686956	0.0464207	-1.47985	0.138914	0.999886
ENSMUSG00000001988	Npas1	18142	511.066	0.0956699	0.0797286	1.19995	0.230161	0.999886
ENSMUSG00000001995	Sipa1l2	244668	2167.39	0.00415785	0.0802033	0.0518414	0.958655	0.999886
ENSMUSG00000001998	Ap4e1	108011	721.532	-0.0849727	0.0917735	-0.925896	0.3545	0.999886
ENSMUSG00000001999	Blvra	109778	633.89	0.0379393	0.0515538	0.735917	0.461781	0.999886
ENSMUSG00000002006	Pdzd4	245469	5148.95	0.030366	0.0423609	0.716841	0.473472	0.999886
ENSMUSG00000002007	Srpk3	56504	413.121	-0.154937	0.0907038	-1.70817	0.0876054	0.999886
ENSMUSG00000002010	Idh3g	15929	4750.33	0.0374093	0.0414712	0.902053	0.367029	0.999886
ENSMUSG00000002014	Ssr4	20832	1442.92	-0.0423177	0.0590398	-0.716765	0.473519	0.999886
ENSMUSG00000002015	Bcap31	27061	2133.7	0.0344248	0.0505381	0.681164	0.495768	0.999886
ENSMUSG00000002017	Fam98a	72722	1820.67	-0.0128097	0.0300127	-0.426808	0.669519	0.999886
ENSMUSG00000002020	Ltbp2	16997	46.7961	-0.139638	0.194602	-0.717556	0.473031	0.999886
ENSMUSG00000002028	Kmt2a	214162	10871	-0.0272909	0.0846405	-0.322433	0.747125	0.999886
ENSMUSG00000002031	Ift46	76568	1656.44	0.0269829	0.0508647	0.530483	0.595777	0.999886
ENSMUSG00000002032	Tmem25	71687	2528.89	0.0184286	0.0471646	0.39073	0.695997	0.999886
ENSMUSG00000002033	Cd3g	12502	3.25251	0.328823	0.773017	0.425375	0.670563	0.999886
ENSMUSG00000002052	Supt6	20926	8058.31	0.0523415	0.0489669	1.06892	0.285107	0.999886
ENSMUSG00000002055	Spag5	54141	878.908	0.0139311	0.0821737	0.169533	0.865378	0.999886
ENSMUSG00000002057	Foxn1	15218	1.55213	1.13981	0.708207	1.60943	0.107523	0.999886
ENSMUSG00000002058	Unc119	22248	1021.73	0.106677	0.0806216	1.32318	0.185777	0.999886
ENSMUSG00000002059	Rab34	19376	733.874	-0.040791	0.0712821	-0.572247	0.567155	0.999886
ENSMUSG00000002064	Sdf2	20316	1535.33	0.0390742	0.0527163	0.741217	0.458562	0.999886
ENSMUSG00000002068	Ccne1	12447	607.577	0.00950307	0.06749	0.140807	0.888022	0.999886
ENSMUSG00000002076	Hsf2bp	74377	15.196	-0.140025	0.235175	-0.595408	0.551571	0.999886
ENSMUSG00000002083	Bbc3	170770	223.258	0.0334495	0.0949849	0.352156	0.724721	0.999886
ENSMUSG00000002100	Mybpc3	17868	36.0858	-0.155313	0.176041	-0.882252	0.37764	0.999886
ENSMUSG00000002102	Psmc3	19182	4699.42	0.0515129	0.0516549	0.99725	0.318643	0.999886
ENSMUSG00000002103	Acp2	11432	2540.79	0.00142758	0.0336615	0.0424099	0.966172	0.999886
ENSMUSG00000002104	Rapsn	19400	31.6843	-0.0734638	0.155888	-0.47126	0.637455	0.999886
ENSMUSG00000002105	Slc39a13	68427	919.404	-0.0275908	0.0428577	-0.643778	0.51972	0.999886
ENSMUSG00000002107	Celf2	14007	17668.8	-0.0710485	0.0434333	-1.63581	0.10188	0.999886
ENSMUSG00000002108	Nr1h3	22259	155.524	0.0275847	0.0938901	0.293798	0.768912	0.999886
ENSMUSG00000002109	Ddb2	107986	394.884	-0.00546132	0.0614785	-0.088833	0.929215	0.999886
ENSMUSG00000002111	Spi1	20375	128.768	0.191785	0.101754	1.88478	0.0594593	0.999886
ENSMUSG00000002129	Sf3a1	67465	3124.1	0.0392891	0.044634	0.880251	0.378723	0.999886
ENSMUSG00000002147	Stat6	20852	525.035	0.0519394	0.0742245	0.699762	0.484076	0.999886
ENSMUSG00000002190	Clgn	12745	736.949	-0.0284625	0.0493537	-0.576703	0.56414	0.999886
ENSMUSG00000002204	Napsa	16541	59.4277	-0.0356904	0.222428	-0.160459	0.87252	0.999886
ENSMUSG00000002205	Vrk3	101568	776.405	0.0407314	0.0478088	0.851963	0.394234	0.999886
ENSMUSG00000002210	Smg9	71997	1263.24	-0.148891	0.0870229	-1.71094	0.087092	0.999886
ENSMUSG00000002221	Paxip1	55982	1807.02	0.0156194	0.03681	0.424326	0.671328	0.999886
ENSMUSG00000002222	Rmnd5a	68477	6598.94	-0.0399462	0.0439399	-0.909112	0.363291	0.999886
ENSMUSG00000002227	Mov10	17454	588.616	-0.0145534	0.087144	-0.167004	0.867367	0.999886
ENSMUSG00000002228	Ppm1j	71887	40.0453	0.121318	0.235738	0.514631	0.606811	0.999886
ENSMUSG00000002233	Rhoc	11853	391.791	0.0337836	0.0823664	0.410163	0.681687	0.999886
ENSMUSG00000002249	Tead3	21678	125.645	-0.0806809	0.0916461	-0.880353	0.378668	0.999886
ENSMUSG00000002250	Ppard	19015	913.069	-0.0311356	0.0621265	-0.501165	0.616255	0.999886
ENSMUSG00000002257	Def6	23853	77.2576	-0.0303688	0.0990149	-0.306709	0.759065	0.999886
ENSMUSG00000002265	Peg3	18616	22676.8	0.0328492	0.0664669	0.494219	0.621152	0.999886
ENSMUSG00000002266	Zim1	22776	255.462	0.0699103	0.153094	0.45665	0.647923	0.999886
ENSMUSG00000002279	Lmf1	76483	836.824	-0.0778687	0.0583849	-1.33371	0.182298	0.999886
ENSMUSG00000002289	Angptl4	57875	111.38	0.207624	0.153968	1.34848	0.177503	0.999886
ENSMUSG00000002297	Dbf4	27214	357.293	0.0348717	0.0972521	0.35857	0.719917	0.999886
ENSMUSG00000002307	Daxx	13163	887.723	0.0319436	0.0432636	0.738348	0.460303	0.999886
ENSMUSG00000002308	Cd320	54219	602.997	0.00326426	0.0536471	0.0608469	0.951481	0.999886
ENSMUSG00000002319	Ipo4	75751	3646.28	0.0290117	0.0525764	0.5518	0.581085	0.999886
ENSMUSG00000002320	Tm9sf1	74140	855.597	0.0162852	0.0484732	0.335963	0.736899	0.999886
ENSMUSG00000002324	Rec8	56739	105.945	-0.230814	0.547597	-0.421503	0.673388	0.999886
ENSMUSG00000002325	Irf9	16391	606.592	0.0807916	0.0825783	0.978363	0.327895	0.999886
ENSMUSG00000002326	Gmpr2	105446	825.405	0.0155235	0.0443869	0.349732	0.726539	0.999886
ENSMUSG00000002329	Mdp1	67881	1478.26	0.0318369	0.0550443	0.578386	0.563003	0.999886
ENSMUSG00000002332	Dhrs1	52585	2042.01	0.130838	0.068745	1.90324	0.0570093	0.999886
ENSMUSG00000002341	Ncan	13004	8010.09	-0.120183	0.0594304	-2.02224	0.0431511	0.999886
ENSMUSG00000002342	Tmem161a	234371	1240.78	0.0259861	0.0498431	0.521358	0.602117	0.999886
ENSMUSG00000002343	Armc6	76813	1111.8	0.0612236	0.0560481	1.09234	0.274684	0.999886
ENSMUSG00000002345	Borcs8	72368	853.508	-0.111891	0.0874375	-1.27967	0.200661	0.999886
ENSMUSG00000002346	Slc25a42	73095	1810.52	-0.0210339	0.0588842	-0.357209	0.720935	0.999886
ENSMUSG00000002365	Snx9	66616	453.971	-0.042923	0.0572179	-0.750168	0.453153	0.999886
ENSMUSG00000002372	Ranbp3	71810	2895.84	0.0342408	0.0600279	0.570415	0.568396	0.999886
ENSMUSG00000002379	Ndufa11	69875	2199.32	0.00589346	0.081754	0.0720877	0.942532	0.999886
ENSMUSG00000002384	Bmp8b	12164	16.0781	-0.0502173	0.176547	-0.284441	0.776072	0.999886
ENSMUSG00000002393	Nr2f6	13864	418.911	0.0771304	0.0856882	0.900128	0.368052	0.999886
ENSMUSG00000002395	Use1	67023	2032.18	0.0604146	0.0880187	0.686384	0.492471	0.999886
ENSMUSG00000002396	Ocel1	77090	688.484	0.0314639	0.0598086	0.526077	0.598835	0.999886
ENSMUSG00000002409	Dyrk1b	13549	1240.72	-0.0375152	0.0571243	-0.656729	0.511355	0.999886
ENSMUSG00000002413	Braf	109880	6037.66	-0.0248218	0.0596651	-0.41602	0.677396	0.999886
ENSMUSG00000002416	Ndufb2	68198	764.542	0.01763	0.0510084	0.34563	0.729621	0.999886
ENSMUSG00000002428	Hltf	20585	1315.02	-0.00265935	0.0641895	-0.0414296	0.966953	0.999886
ENSMUSG00000002455	Prpf6	68879	2583.58	0.0752874	0.0442276	1.70227	0.0887044	0.999886
ENSMUSG00000002458	Rgs19	56470	649.579	0.0942252	0.0550285	1.7123	0.086842	0.999886
ENSMUSG00000002477	Snrpd1	20641	1046.81	-0.045683	0.0679261	-0.67254	0.50124	0.999886
ENSMUSG00000002486	Tchp	77832	612.688	0.00567854	0.0612317	0.0927386	0.926111	0.999886
ENSMUSG00000002489	Tiam1	21844	5353.3	0.0125908	0.0598327	0.210434	0.833329	0.999886
ENSMUSG00000002496	Tsc2	22084	4950.9	0.005235	0.053207	0.0983893	0.921623	0.999886
ENSMUSG00000002500	Rpl3l	66211	16.4942	-0.114444	0.176817	-0.647247	0.517472	0.999886
ENSMUSG00000002504	Slc9a3r2	65962	1378.62	0.0515262	0.0814501	0.63261	0.526988	0.999886
ENSMUSG00000002524	Puf60	67959	4797.26	0.0613874	0.0602231	1.01933	0.308045	0.999886
ENSMUSG00000002546	Golga2	99412	4607.71	0.0242907	0.0401317	0.605275	0.544996	0.999886
ENSMUSG00000002550	Uck1	22245	1497.37	0.0660841	0.044623	1.48094	0.138622	0.999886
ENSMUSG00000002565	Scin	20259	9.97373	0.301299	0.249586	1.2072	0.227357	0.999886
ENSMUSG00000002578	Ikzf4	22781	786.277	0.0104334	0.0422614	0.246878	0.805003	0.999886
ENSMUSG00000002580	Mien1	103742	394.391	0.0465693	0.0943767	0.493441	0.621701	0.999886
ENSMUSG00000002588	Pon1	18979	4.1071	-0.710597	0.685946	-1.03594	0.300231	0.999886
ENSMUSG00000002602	Axl	26362	2010.78	-0.0838865	0.0507129	-1.65414	0.0980981	0.999886
ENSMUSG00000002603	Tgfb1	21803	179.419	0.139967	0.100163	1.39739	0.162297	0.999886
ENSMUSG00000002608	Ccdc97	52132	1972.3	0.0415595	0.0504247	0.82419	0.409832	0.999886
ENSMUSG00000002617	Zfp40	22700	1052.84	-0.0575098	0.0764429	-0.752324	0.451856	0.999886
ENSMUSG00000002625	Akap8l	54194	5677.44	-0.0398598	0.0806477	-0.494246	0.621133	0.999886
ENSMUSG00000002633	Shh	20423	101.089	-0.00584307	0.0893602	-0.0653878	0.947865	0.999886
ENSMUSG00000002635	Pdcd2l	68079	449.745	0.0260271	0.0530221	0.490873	0.623516	0.999886
ENSMUSG00000002658	Gtf2f1	98053	2457.27	0.0477608	0.0605855	0.78832	0.43051	0.999886
ENSMUSG00000002660	Clpp	53895	1424.97	0.0819853	0.0794349	1.03211	0.302022	0.999886
ENSMUSG00000002661	Alkbh7	66400	418.813	0.0171852	0.0706632	0.243199	0.807852	0.999886
ENSMUSG00000002664	Pspn	19197	17.8135	-0.0177026	0.168703	-0.104933	0.916429	0.999886
ENSMUSG00000002668	Dennd1c	70785	84.6111	0.180942	0.131147	1.37969	0.167683	0.999886
ENSMUSG00000002679	Med6	69792	563.474	-0.00570166	0.0594092	-0.0959728	0.923542	0.999886
ENSMUSG00000002688	Prkd1	18760	410.72	-0.0704327	0.0477187	-1.476	0.139944	0.999886
ENSMUSG00000002699	Lcp2	16822	118.101	0.16594	0.101399	1.6365	0.101734	0.999886
ENSMUSG00000002718	Cse1l	110750	3045.67	0.0139503	0.0608515	0.229251	0.818673	0.999886
ENSMUSG00000002728	Naa20	67877	1775.46	0.00568684	0.0512425	0.110979	0.911633	0.999886
ENSMUSG00000002731	Prkra	23992	632.872	0.106822	0.0527134	2.02646	0.0427175	0.999886
ENSMUSG00000002732	Fkbp7	14231	107.384	0.0361648	0.0971107	0.372407	0.70959	0.999886
ENSMUSG00000002733	Plekha3	83435	1454.47	-0.027625	0.0350053	-0.789167	0.430014	0.999886
ENSMUSG00000002741	Ykt6	56418	3740.72	0.0468677	0.0350613	1.33674	0.181308	0.999886
ENSMUSG00000002748	Baz1b	22385	6891.15	0.00951707	0.0299311	0.317966	0.750511	0.999886
ENSMUSG00000002763	Pex6	224824	2496.94	0.00588651	0.0742468	0.079283	0.936808	0.999886
ENSMUSG00000002767	Mrpl2	27398	971.663	0.0580721	0.0754244	0.769938	0.441337	0.999886
ENSMUSG00000002768	Mea1	17256	1666.6	0.0352777	0.0768948	0.458779	0.646393	0.999886
ENSMUSG00000002769	Gnmt	14711	39.3209	0.179953	0.138937	1.29522	0.195245	0.999886
ENSMUSG00000002771	Grin2d	14814	1304.2	0.138573	0.092472	1.49854	0.133992	0.999886
ENSMUSG00000002778	Kdelr1	68137	1955.08	0.0393827	0.0407164	0.967244	0.333422	0.999886
ENSMUSG00000002781	Tmem143	70209	863.272	-0.0278815	0.0516135	-0.540198	0.58906	0.999886
ENSMUSG00000002791	Pdxk-ps	435518	7.27003	-0.109734	0.291297	-0.376708	0.706391	0.999886
ENSMUSG00000002797	Ggct	110175	536.425	0.00840973	0.0604218	0.139184	0.889305	0.999886
ENSMUSG00000002799	Jag2	16450	1769.21	0.00381522	0.0653558	0.0583762	0.953449	0.999886
ENSMUSG00000002803	Btbd6	399566	1980.32	0.0100219	0.0653472	0.153364	0.878111	0.999886
ENSMUSG00000002804	Nudt14	66174	227.416	0.106848	0.0892478	1.19721	0.231225	0.999886
ENSMUSG00000002808	Epdr1	105298	4861.6	0.0166378	0.0461089	0.360838	0.71822	0.999886
ENSMUSG00000002812	Flii	14248	2656.59	0.0558359	0.0532906	1.04776	0.294748	0.999886
ENSMUSG00000002814	Top3a	21975	309.331	0.0337508	0.0616232	0.547696	0.583901	0.999886
ENSMUSG00000002820	Atg4d	235040	880.783	0.00327584	0.0593828	0.0551647	0.956007	0.999886
ENSMUSG00000002825	Qtrt1	60507	522.909	0.00471281	0.0648238	0.0727019	0.942043	0.999886
ENSMUSG00000002831	Plin4	57435	598.128	0.53235	0.359867	1.4793	0.139061	0.999886
ENSMUSG00000002833	Hdgfl2	15193	3382.82	-0.000777883	0.0600241	-0.0129595	0.98966	0.999886
ENSMUSG00000002835	Chaf1a	27221	144.992	0.0677622	0.0847274	0.799768	0.423845	0.999886
ENSMUSG00000002844	Adprh	11544	2680.84	0.0570173	0.0600391	0.94967	0.34228	0.999886
ENSMUSG00000002845	Tmem39a	67846	394.896	-0.0669926	0.0594382	-1.1271	0.259702	0.999886
ENSMUSG00000002846	Timmdc1	76916	709.346	-0.0437395	0.0450989	-0.969857	0.332118	0.999886
ENSMUSG00000002847	Pla1a	85031	33.4474	0.117979	0.19778	0.596515	0.550831	0.999886
ENSMUSG00000002870	Mcm2	17216	172.428	-0.053947	0.0867312	-0.622002	0.533941	0.999886
ENSMUSG00000002871	Tpra1	24100	1038.85	0.0279574	0.0619659	0.451173	0.651865	0.999886
ENSMUSG00000002881	Nab1	17936	1111.62	-0.0050794	0.0492769	-0.103079	0.917901	0.999886
ENSMUSG00000002885	Adgre5	26364	212.873	-0.162918	0.111452	-1.46179	0.1438	0.999886
ENSMUSG00000002897	Il17ra	16172	734.134	-0.0450084	0.0606814	-0.741717	0.458259	0.999886
ENSMUSG00000002900	Lamb1	16777	905.273	-0.00143698	0.0602546	-0.0238484	0.980974	0.999886
ENSMUSG00000002908	Kcnn1	84036	724.323	0.0591435	0.05716	1.0347	0.300809	0.999886
ENSMUSG00000002910	Arrdc2	70807	457.037	0.162828	0.167489	0.972175	0.330963	0.999886
ENSMUSG00000002930	Ppp1r17	19051	44.3718	0.167026	0.28783	0.580294	0.561717	0.999886
ENSMUSG00000002944	Cd36	12491	72.0654	0.0570671	0.175495	0.325177	0.745047	0.999886
ENSMUSG00000002948	Map2k7	26400	3639.11	0.0171808	0.0319239	0.538182	0.590452	0.999886
ENSMUSG00000002949	Timm44	21856	2471.56	-0.0362656	0.0526904	-0.688278	0.491277	0.999886
ENSMUSG00000002963	Pnkp	59047	981.292	-0.0603289	0.0633708	-0.952	0.341097	0.999886
ENSMUSG00000002968	Med25	75613	2401.46	0.0448788	0.0671987	0.667853	0.504227	0.999886
ENSMUSG00000002980	Bcam	57278	570.107	0.037603	0.11517	0.326501	0.744045	0.999886
ENSMUSG00000002981	Clptm1	56457	5953.81	0.0462737	0.0536854	0.861941	0.38872	0.999886
ENSMUSG00000002983	Relb	19698	233.756	0.0115131	0.0759534	0.151581	0.879517	0.999886
ENSMUSG00000002984	Tomm40	53333	2026.71	0.0114039	0.0736224	0.154896	0.876903	0.999886
ENSMUSG00000002985	Apoe	11816	46209	0.0309042	0.0661548	0.467149	0.640393	0.999886
ENSMUSG00000002992	Apoc2	11813	1.7755	0.839722	0.828745	1.01324	0.310943	0.999886
ENSMUSG00000002996	Hbp1	73389	1851.23	-0.0377728	0.0477611	-0.790869	0.429021	0.999886
ENSMUSG00000002997	Prkar2b	19088	3367.81	-0.0552556	0.0552072	-1.00088	0.316886	0.999886
ENSMUSG00000003031	Cdkn1b	12576	1894.01	-0.0327966	0.0570288	-0.575089	0.565231	0.999886
ENSMUSG00000003032	Klf4	16600	182.184	-0.0276393	0.161269	-0.171386	0.86392	0.999886
ENSMUSG00000003033	Ap1m1	11767	2581.62	-0.00668532	0.0386097	-0.173151	0.862532	0.999886
ENSMUSG00000003037	Rab8a	17274	1418.36	-0.014601	0.0437244	-0.333933	0.73843	0.999886
ENSMUSG00000003038	Hmgn2	15331	1576.18	-0.000189354	0.147372	-0.00128487	0.998975	0.999886
ENSMUSG00000003039	Fam32a	67922	3246.2	0.114036	0.0803357	1.41949	0.155757	0.999886
ENSMUSG00000003051	Elf3	13710	3.20411	-0.315019	0.405747	-0.776394	0.437517	0.999886
ENSMUSG00000003062	Stard3nl	76205	1294.12	0.0356471	0.0461538	0.772355	0.439904	0.999886
ENSMUSG00000003068	Stk11	20869	2709.99	-0.00167809	0.0504134	-0.0332866	0.973446	0.999886
ENSMUSG00000003070	Efna2	13637	200.679	0.103883	0.0586172	1.77223	0.0763572	0.999886
ENSMUSG00000003072	Atp5d	66043	5870.77	0.0473178	0.0949644	0.498268	0.618295	0.999886
ENSMUSG00000003099	Ppp5c	19060	3812.9	0.0313454	0.0558365	0.56138	0.574539	0.999886
ENSMUSG00000003119	Cdk12	69131	1308.38	-0.0653831	0.061249	-1.0675	0.285748	0.999886
ENSMUSG00000003123	Lipe	16890	456.26	0.00530109	0.065894	0.0804488	0.93588	0.999886
ENSMUSG00000003131	Pafah1b2	18475	9280.49	0.00570065	0.0340857	0.167245	0.867177	0.999886
ENSMUSG00000003134	Tbc1d8	54610	1222.7	-0.0305276	0.0577602	-0.528524	0.597136	0.999886
ENSMUSG00000003135	Cnot11	52846	1226.83	0.0291681	0.0315432	0.924704	0.35512	0.999886
ENSMUSG00000003153	Slc2a3	20527	6171.23	0.0534508	0.048957	1.09179	0.274925	0.999886
ENSMUSG00000003154	Foxj2	60611	1604.45	0.0029625	0.0458396	0.0646274	0.948471	0.999886
ENSMUSG00000003161	Sri	109552	2114.32	-0.0684493	0.0373425	-1.83301	0.0668004	0.999886
ENSMUSG00000003166	Dgcr2	13356	3549.28	0.0385816	0.0489745	0.787789	0.43082	0.999886
ENSMUSG00000003184	Irf3	54131	755.227	0.0920468	0.0872276	1.05525	0.291312	0.999886
ENSMUSG00000003190	Bcl2l12	75736	35.4653	-0.0972139	0.128201	-0.758292	0.448276	0.999886
ENSMUSG00000003198	Zfp959	224893	201.234	-0.0999453	0.0659461	-1.51556	0.129631	0.999886
ENSMUSG00000003199	Mpnd	68047	3008.64	0.10398	0.0769633	1.35104	0.176684	0.999886
ENSMUSG00000003200	Sh3gl1	20405	1246.67	0.0368166	0.0473065	0.778255	0.436419	0.999886
ENSMUSG00000003206	Ebi3	50498	12.4076	-0.375359	0.212512	-1.7663	0.0773456	0.999886
ENSMUSG00000003208	Yju2	72886	224.84	-0.0272669	0.0676683	-0.40295	0.686985	0.999886
ENSMUSG00000003226	Ranbp2	19386	5945.13	-0.0460152	0.0885844	-0.519451	0.603446	0.999886
ENSMUSG00000003228	Grk5	14773	647.958	-0.0568194	0.0677221	-0.839008	0.401465	0.999886
ENSMUSG00000003233	Dvl3	13544	1528.15	-0.00801534	0.0647716	-0.123748	0.901515	0.999886
ENSMUSG00000003234	Abcf3	27406	2864.49	0.0776676	0.0386017	2.01203	0.044217	0.999886
ENSMUSG00000003235	Eif2b5	224045	2294.07	0.0436347	0.0489334	0.891718	0.372544	0.999886
ENSMUSG00000003269	Cyth2	19158	2673.49	0.0519022	0.0540417	0.96041	0.336849	0.999886
ENSMUSG00000003271	Sult2b1	54200	198.477	0.07335	0.112412	0.652511	0.514071	0.999886
ENSMUSG00000003273	Car11	12348	6346.77	-0.00405399	0.0683609	-0.0593028	0.952711	0.999886
ENSMUSG00000003279	Dlgap1	224997	15827.8	-0.00449005	0.072345	-0.0620644	0.950512	0.999886
ENSMUSG00000003282	Plag1	56711	176.27	-0.0472107	0.12997	-0.363245	0.716422	0.999886
ENSMUSG00000003283	Hck	15162	93.6775	0.203715	0.117123	1.73933	0.0819763	0.999886
ENSMUSG00000003299	Mrpl4	66163	1384.15	0.0277894	0.0572475	0.485426	0.627374	0.999886
ENSMUSG00000003308	Keap1	50868	2033.8	0.0643225	0.0439787	1.46259	0.143581	0.999886
ENSMUSG00000003309	Ap1m2	11768	51.7792	0.202188	0.110638	1.82748	0.0676282	0.999886
ENSMUSG00000003316	Glg1	20340	9588.59	-0.0142954	0.0794541	-0.179921	0.857215	0.999886
ENSMUSG00000003341	Atp8b3	67331	22.2639	0.204871	0.179261	1.14287	0.253095	0.999886
ENSMUSG00000003344	Btbd2	208198	2973.16	0.0378901	0.0712711	0.531634	0.59498	0.999886
ENSMUSG00000003345	Csnk1g2	103236	5378.3	0.0164896	0.0664095	0.248302	0.803901	0.999886
ENSMUSG00000003346	Abhd17a	216169	3579.66	0.0376017	0.0827877	0.454195	0.649689	0.999886
ENSMUSG00000003352	Cacnb3	12297	8622.34	-0.0194001	0.070541	-0.275018	0.783302	0.999886
ENSMUSG00000003354	Ccdc65	105833	292.674	-0.00928105	0.0580331	-0.159927	0.872939	0.999886
ENSMUSG00000003355	Fkbp11	66120	42.2492	0.00215912	0.119856	0.0180143	0.985627	0.999886
ENSMUSG00000003360	Ddx23	74351	3557.9	0.0426602	0.0432877	0.985503	0.324377	0.999886
ENSMUSG00000003363	Pld3	18807	19278.6	-0.0323944	0.072829	-0.444801	0.656463	0.999886
ENSMUSG00000003378	Grik5	14809	10175.8	0.0266981	0.0764922	0.34903	0.727067	0.999886
ENSMUSG00000003379	Cd79a	12518	16.9219	0.0169444	0.277411	0.0610805	0.951295	0.999886
ENSMUSG00000003380	Rabac1	14470	4103.67	0.138929	0.0985058	1.41036	0.158434	0.999886
ENSMUSG00000003382	Etv3	27049	1539.86	0.0240969	0.0450999	0.5343	0.593134	0.999886
ENSMUSG00000003402	Prkcsh	19089	2887.3	0.0439989	0.056363	0.780634	0.435018	0.999886
ENSMUSG00000003410	Elavl3	15571	9816.96	-0.0112905	0.035365	-0.319256	0.749533	0.999886
ENSMUSG00000003411	Rab3b	69908	1726.07	0.0915974	0.0905853	1.01117	0.311933	0.999886
ENSMUSG00000003418	St8sia6	241230	213.452	0.0716152	0.115627	0.619364	0.535677	0.999886
ENSMUSG00000003420	Fcgrt	14132	497.667	-0.015829	0.0953423	-0.166023	0.868139	0.999886
ENSMUSG00000003421	Nosip	66394	1390.74	0.0679577	0.0606402	1.12067	0.262428	0.999886
ENSMUSG00000003423	Pih1d1	68845	819.936	0.0675994	0.0811678	0.832834	0.404938	0.999886
ENSMUSG00000003429	Rps11	27207	6107.2	0.0992185	0.0717823	1.38221	0.166906	0.999886
ENSMUSG00000003435	Supt5	20924	6828.73	0.0608545	0.050226	1.21161	0.225661	0.999886
ENSMUSG00000003436	Dll3	13389	48.6495	0.211334	0.128348	1.64657	0.0996467	0.999886
ENSMUSG00000003437	Paf1	54624	2379.97	0.0277693	0.0436536	0.636127	0.524693	0.999886
ENSMUSG00000003438	Timm50	66525	1023.35	0.00470886	0.0650272	0.0724136	0.942273	0.999886
ENSMUSG00000003444	Med29	67224	400.25	0.0501709	0.067836	0.739591	0.459548	0.999886
ENSMUSG00000003452	Bicd1	12121	2299.6	0.0171356	0.0727256	0.23562	0.813727	0.999886
ENSMUSG00000003458	Ncstn	59287	2002.91	-0.0151195	0.054955	-0.275125	0.78322	0.999886
ENSMUSG00000003464	Pex19	19298	2805.43	0.0293482	0.0381364	0.76956	0.441561	0.999886
ENSMUSG00000003469	Phyhip	105653	16901.5	0.0771323	0.0645046	1.19577	0.231788	0.999886
ENSMUSG00000003476	Crhr2	12922	100.232	0.095788	0.0873664	1.09639	0.272906	0.999886
ENSMUSG00000003477	Inmt	21743	34.2679	0.387368	0.242001	1.60069	0.109446	0.999886
ENSMUSG00000003484	Cyp4f18	72054	16.7881	-0.395367	0.461999	-0.855775	0.392122	0.999886
ENSMUSG00000003500	Impdh1	23917	2118.73	0.00796787	0.0534027	0.149204	0.881393	0.999886
ENSMUSG00000003518	Dusp3	72349	5298.23	-0.0722255	0.0611039	-1.18201	0.237201	0.999886
ENSMUSG00000003526	Prodh	19125	1192.74	0.0722003	0.0907873	0.795269	0.426457	0.999886
ENSMUSG00000003527	Ess2	27886	1062.52	0.0465264	0.0460777	1.00974	0.312621	0.999886
ENSMUSG00000003528	Slc25a1	13358	1408.11	0.0588408	0.0695216	0.846367	0.397348	0.999886
ENSMUSG00000003531	Dgcr6	13353	1198.42	0.0707136	0.0800538	0.883327	0.37706	0.999886
ENSMUSG00000003534	Ddr1	12305	3172.04	-0.0352823	0.0581089	-0.607176	0.543734	0.999886
ENSMUSG00000003545	Fosb	14282	620.587	-0.13605	0.162411	-0.837691	0.402204	0.999886
ENSMUSG00000003546	Klc4	74764	1101.95	0.05384	0.0583557	0.922617	0.356207	0.999886
ENSMUSG00000003549	Ercc1	13870	809.467	-0.0547775	0.0577559	-0.948431	0.34291	0.999886
ENSMUSG00000003555	Cyp17a1	13074	2.81892	0.41808	0.429881	0.972548	0.330778	0.999886
ENSMUSG00000003559	As3mt	57344	507.934	-0.0234362	0.0716107	-0.327272	0.743462	0.999886
ENSMUSG00000003573	Homer3	26558	349.066	0.0033666	0.0919583	0.03661	0.970796	0.999886
ENSMUSG00000003575	Crtc1	382056	8061.33	0.0176226	0.0532305	0.331063	0.740597	0.999886
ENSMUSG00000003581	Rnf215	71673	1010.61	-0.0408788	0.0516826	-0.790958	0.428968	0.999886
ENSMUSG00000003585	Sec14l2	67815	1741.5	0.0165965	0.0456378	0.363657	0.716114	0.999886
ENSMUSG00000003604	Aven	74268	354.018	0.0488397	0.0667964	0.731174	0.464673	0.999886
ENSMUSG00000003617	Cp	12870	607.407	0.123828	0.156432	0.791576	0.428608	0.999886
ENSMUSG00000003644	Rps6ka1	20111	626.413	0.0700048	0.0611915	1.14403	0.252612	0.999886
ENSMUSG00000003657	Calb2	12308	2266.62	0.143317	0.145246	0.986719	0.32378	0.999886
ENSMUSG00000003660	Snrnp200	320632	5222.32	0.0575823	0.068597	0.839428	0.401229	0.999886
ENSMUSG00000003662	Ciao1	26371	1869.3	0.0197344	0.0445007	0.443464	0.65743	0.999886
ENSMUSG00000003665	Has1	15116	102.907	0.0965473	0.0964516	1.00099	0.31683	0.999886
ENSMUSG00000003680	Taf6l	225895	679.895	0.0836998	0.048477	1.72659	0.0842421	0.999886
ENSMUSG00000003721	Insig2	72999	1887.39	-0.0142975	0.0404215	-0.353711	0.723556	0.999886
ENSMUSG00000003731	Kpna6	16650	5274.88	0.0355939	0.0418142	0.85124	0.394636	0.999886
ENSMUSG00000003746	Man1a	17155	1529.62	-0.108596	0.0715072	-1.51867	0.128846	0.999886
ENSMUSG00000003752	Itpkc	233011	542.377	0.0740787	0.0574624	1.28917	0.19734	0.999886
ENSMUSG00000003762	Coq8b	76889	859.923	0.0238926	0.0625896	0.381734	0.702659	0.999886
ENSMUSG00000003778	Brd8	78656	2723.89	0.000637468	0.0358799	0.0177667	0.985825	0.999886
ENSMUSG00000003779	Kif20a	19348	76.8327	0.0976657	0.0758243	1.28805	0.197728	0.999886
ENSMUSG00000003808	Farsa	66590	1430.46	0.0194385	0.0380094	0.511414	0.609061	0.999886
ENSMUSG00000003809	Gcdh	270076	1125.92	-0.0496984	0.0532159	-0.933902	0.350355	0.999886
ENSMUSG00000003810	Mast2	17776	5512.81	0.0293778	0.0547723	0.536363	0.591708	0.999886
ENSMUSG00000003812	Dnase2a	13423	285.743	-0.059193	0.0752782	-0.786324	0.431678	0.999886
ENSMUSG00000003813	Rad23a	19358	1480.59	0.0391448	0.0485224	0.806738	0.419818	0.999886
ENSMUSG00000003814	Calr	12317	12721.9	-0.0752623	0.0597254	-1.26014	0.207619	0.999886
ENSMUSG00000003824	Syce2	71846	92.7472	-0.0689501	0.100715	-0.684603	0.493594	0.999886
ENSMUSG00000003847	Nfat5	54446	5982.41	-0.0233761	0.0586487	-0.398579	0.690204	0.999886
ENSMUSG00000003848	Nob1	67619	1119.59	-0.00596881	0.0368016	-0.162189	0.871157	0.999886
ENSMUSG00000003849	Nqo1	18104	197.044	0.0119867	0.0770197	0.155632	0.876323	0.999886
ENSMUSG00000003863	Ppfia3	76787	9339.26	0.0736214	0.0592648	1.24225	0.214146	0.999886
ENSMUSG00000003865	Gys1	14936	802.287	-0.0596784	0.053395	-1.11768	0.263705	0.999886
ENSMUSG00000003868	Ruvbl2	20174	936.002	0.0123945	0.0517881	0.239332	0.810848	0.999886
ENSMUSG00000003872	Lin7b	22342	1702.28	-0.0119949	0.0781914	-0.153404	0.878079	0.999886
ENSMUSG00000003873	Bax	12028	1087.58	0.0150038	0.0755199	0.198673	0.842519	0.999886
ENSMUSG00000003882	Il7r	16197	25.58	0.000456733	0.211515	0.00215934	0.998277	0.999886
ENSMUSG00000003923	Tfam	21780	1465.21	0.0289884	0.0299462	0.968017	0.333036	0.999886
ENSMUSG00000003929	Zfp81	224694	1491.17	-0.0521384	0.0711845	-0.73244	0.4639	0.999886
ENSMUSG00000003934	Efnb3	13643	4719.36	-0.049785	0.051089	-0.974477	0.32982	0.999886
ENSMUSG00000003948	Mmd	67468	8770.59	-0.0505245	0.0528083	-0.956754	0.338692	0.999886
ENSMUSG00000003949	Hlf	217082	8067.31	-0.0772689	0.0630402	-1.22571	0.220308	0.999886
ENSMUSG00000003955	Fam162a	70186	840.649	0.0182907	0.0677274	0.270064	0.787111	0.999886
ENSMUSG00000003970	Rpl8	26961	8467.75	0.0629871	0.075003	0.839795	0.401023	0.999886
ENSMUSG00000003992	Ssbp2	66970	2459.56	0.0324911	0.0422418	0.769169	0.441793	0.999886
ENSMUSG00000004018	Fancl	67030	207.061	-0.0921337	0.0687491	-1.34014	0.180199	0.999886
ENSMUSG00000004031	Brinp2	240843	4380.53	0.0470444	0.059051	0.796674	0.42564	0.999886
ENSMUSG00000004032	Gstm5	14866	3092.98	0.0731071	0.0711413	1.02763	0.304123	0.999886
ENSMUSG00000004035	Gstm7	68312	616.034	-0.0666731	0.0863739	-0.771912	0.440167	0.999886
ENSMUSG00000004038	Gstm3	14864	14.4891	-0.0565957	0.20714	-0.273224	0.784681	0.999886
ENSMUSG00000004040	Stat3	20848	2342.81	0.0542723	0.0500227	1.08495	0.277942	0.999886
ENSMUSG00000004043	Stat5a	20850	108.959	0.0684549	0.0880189	0.77773	0.436728	0.999886
ENSMUSG00000004044	Cavin1	19285	778.303	-0.0280816	0.0982411	-0.285844	0.774998	0.999886
ENSMUSG00000004054	Map3k11	26403	1026.2	0.00302178	0.0594041	0.0508682	0.959431	0.999886
ENSMUSG00000004069	Dnaja3	83945	2478.78	0.0403419	0.0384731	1.04857	0.294375	0.999886
ENSMUSG00000004070	Hmox2	15369	1672.62	0.070571	0.0437824	1.61186	0.106993	0.999886
ENSMUSG00000004071	Cdip1	66626	9164.5	0.0673888	0.0495822	1.35913	0.174105	0.999886
ENSMUSG00000004085	Map3k20	65964	512.131	-0.0340784	0.0711991	-0.478635	0.632198	0.999886
ENSMUSG00000004096	Cwc15	66070	2030.84	0.0189958	0.0397578	0.477789	0.6328	0.999886
ENSMUSG00000004098	Col5a3	53867	283.274	0.0326279	0.139339	0.234162	0.814859	0.999886
ENSMUSG00000004099	Dnmt1	13433	2557.31	0.0622218	0.0575115	1.0819	0.279296	0.999886
ENSMUSG00000004100	Ppan	235036	620.728	-0.0255317	0.076088	-0.335555	0.737206	0.999886
ENSMUSG00000004105	Angptl2	26360	240.741	-0.167687	0.12603	-1.33053	0.183344	0.999886
ENSMUSG00000004110	Cacna1e	12290	17152	-0.0496716	0.0585903	-0.847779	0.396561	0.999886
ENSMUSG00000004113	Cacna1b	12287	7368.79	-0.0182641	0.0567394	-0.321894	0.747533	0.999886
ENSMUSG00000004127	Trmt10a	108943	346.528	-0.0772823	0.0565972	-1.36548	0.172102	0.999886
ENSMUSG00000004151	Etv1	14009	2592.19	-0.142391	0.0836032	-1.70318	0.088535	0.999886
ENSMUSG00000004187	Kifc2	16581	18548	0.0115041	0.059655	0.192843	0.847082	0.999886
ENSMUSG00000004207	Psap	19156	60162	0.043982	0.0522181	0.842276	0.399633	0.999886
ENSMUSG00000004221	Ikbkg	16151	2001.07	0.0166382	0.0423357	0.393008	0.694314	0.999886
ENSMUSG00000004231	Pax2	18504	9.68776	0.132167	0.302305	0.437197	0.661968	0.999886
ENSMUSG00000004233	Wars2	70560	381.74	0.0173625	0.0750499	0.231347	0.817045	0.999886
ENSMUSG00000004263	Atn1	13498	7174.32	0.0843401	0.0753279	1.11964	0.262867	0.999886
ENSMUSG00000004264	Phb2	12034	1792.1	0.0412849	0.0535053	0.771605	0.440349	0.999886
ENSMUSG00000004266	Ptpn6	15170	160.707	0.0827996	0.108806	0.760986	0.446666	0.999886
ENSMUSG00000004268	Emg1	14791	928.695	-0.0232539	0.0495141	-0.469642	0.638611	0.999886
ENSMUSG00000004270	Lpcat3	14792	668.414	0.0244628	0.0387008	0.6321	0.527322	0.999886
ENSMUSG00000004285	Atp6v1f	66144	3073.57	0.0476391	0.0686771	0.693668	0.487891	0.999886
ENSMUSG00000004296	Il12b	16160	0.582381	-0.319095	0.874191	-0.365017	0.715099	0.999886
ENSMUSG00000004317	Clcn5	12728	895.023	0.0626504	0.0728979	0.859426	0.390106	0.999886
ENSMUSG00000004319	Clcn3	12725	8654.53	-0.0539473	0.0557708	-0.967305	0.333392	0.999886
ENSMUSG00000004328	Hif3a	53417	380.414	0.301448	0.293329	1.02768	0.304101	0.999886
ENSMUSG00000004347	Pde1c	18575	553.791	-0.0746846	0.0959588	-0.778299	0.436393	0.999886
ENSMUSG00000004356	Utp20	70683	1272.03	-0.0177506	0.0532919	-0.333082	0.739072	0.999886
ENSMUSG00000004359	Spic	20728	32.3278	0.102841	0.160693	0.639987	0.522181	0.999886
ENSMUSG00000004360	9330159F19Rik	212448	4742.24	-0.0284454	0.0560325	-0.507658	0.611693	0.999886
ENSMUSG00000004364	Cul3	26554	5671.68	-0.0163186	0.0531023	-0.307305	0.758611	0.999886
ENSMUSG00000004366	Sst	20604	4814.62	-0.0245929	0.0954638	-0.257615	0.796704	0.999886
ENSMUSG00000004371	Il11	16156	8.86809	0.26033	0.229355	1.13505	0.256352	0.999886
ENSMUSG00000004383	Large1	16795	5958.8	0.0164801	0.0583783	0.282299	0.777715	0.999886
ENSMUSG00000004393	Ddx56	52513	1253.31	0.0465377	0.0468373	0.993603	0.320416	0.999886
ENSMUSG00000004394	Tmed4	103694	2381.16	-0.0265457	0.0403082	-0.658569	0.510173	0.999886
ENSMUSG00000004415	Col26a1	140709	268.371	-0.231682	0.237832	-0.974142	0.329986	0.999886
ENSMUSG00000004446	Bid	12122	361.484	-0.0193712	0.0746385	-0.259533	0.795224	0.999886
ENSMUSG00000004451	Ralb	64143	810.264	0.00275133	0.0450862	0.0610236	0.95134	0.999886
ENSMUSG00000004455	Ppp1cc	19047	7805.94	0.0121184	0.0425989	0.284476	0.776045	0.999886
ENSMUSG00000004460	Dnajb11	67838	1853.02	-0.0278242	0.04478	-0.621353	0.534368	0.999886
ENSMUSG00000004462	Tbccd1	70573	489.629	0.0246186	0.041252	0.596785	0.550651	0.999886
ENSMUSG00000004500	Zfp324	243834	487.434	0.0101132	0.0440195	0.229744	0.818291	0.999886
ENSMUSG00000004508	Gab2	14389	1286.03	0.046413	0.040192	1.15478	0.24818	0.999886
ENSMUSG00000004530	Coro1c	23790	2723.83	0.0814803	0.0623268	1.30731	0.191109	0.999886
ENSMUSG00000004535	Tax1bp1	52440	6004.08	0.00550595	0.0461267	0.119366	0.904985	0.999886
ENSMUSG00000004540	Psg17	26437	1.13232	-0.891522	0.685279	-1.30096	0.193272	0.999886
ENSMUSG00000004542	Psg19	26439	0.905166	-1.0793	0.800848	-1.34769	0.177758	0.999886
ENSMUSG00000004552	Ctse	13034	6.18664	-0.671103	0.638092	-1.05173	0.292922	0.999886
ENSMUSG00000004558	Ndrg2	29811	24006.5	0.0523938	0.0639465	0.819337	0.412594	0.999886
ENSMUSG00000004561	Mettl17	52535	1095.97	-0.0200503	0.0446033	-0.449526	0.653052	0.999886
ENSMUSG00000004562	Arhgef40	268739	1477	0.00878065	0.0704799	0.124584	0.900853	0.999886
ENSMUSG00000004565	Pnpla6	50767	2721.91	0.0671092	0.0507639	1.32199	0.186173	0.999886
ENSMUSG00000004567	Mcoln1	94178	2465.95	0.0339519	0.0437746	0.775606	0.437981	0.999886
ENSMUSG00000004568	Arhgef18	102098	2567.43	0.0445567	0.0543255	0.820179	0.412114	0.999886
ENSMUSG00000004591	Pkn2	109333	1365.43	-0.0516638	0.0591513	-0.873418	0.382436	0.999886
ENSMUSG00000004609	Cd33	12489	206.43	0.0238334	0.101335	0.235194	0.814058	0.999886
ENSMUSG00000004610	Etfb	110826	1041.12	-0.0149706	0.0731534	-0.204646	0.837848	0.999886
ENSMUSG00000004612	Nkg7	72310	3.25078	0.10597	0.475491	0.222863	0.823642	0.999886
ENSMUSG00000004626	Stxbp2	20911	1957.79	0.0496474	0.0682021	0.727946	0.466646	0.999886
ENSMUSG00000004630	Pcp2	18545	24.3875	-0.146754	0.26869	-0.546183	0.58494	0.999886
ENSMUSG00000004631	Sgce	20392	814.281	-0.0351012	0.0450137	-0.77979	0.435515	0.999886
ENSMUSG00000004633	Chn2	69993	1125.89	0.045628	0.067339	0.677587	0.498034	0.999886
ENSMUSG00000004637	Wwox	80707	973.34	0.0543114	0.0542849	1.00049	0.317074	0.999886
ENSMUSG00000004642	Slbp	20492	770.337	0.0437178	0.0450634	0.970139	0.331977	0.999886
ENSMUSG00000004651	Tyr	22173	30.1014	0.108753	0.168022	0.647254	0.517468	0.999886
ENSMUSG00000004655	Aqp1	11826	78.1942	-0.130922	0.288233	-0.454222	0.649669	0.999886
ENSMUSG00000004661	Arid3b	56380	345.414	-0.0520624	0.0923206	-0.56393	0.572802	0.999886
ENSMUSG00000004665	Cnn2	12798	218.066	-0.019709	0.106427	-0.185187	0.853082	0.999886
ENSMUSG00000004667	Polr2e	66420	1803.37	0.0356008	0.0709194	0.501989	0.615675	0.999886
ENSMUSG00000004668	Abca13	268379	10.8736	0.0501626	0.334506	0.14996	0.880796	0.999886
ENSMUSG00000004677	Myo9b	17925	3692.11	-0.033123	0.0656058	-0.504879	0.613644	0.999886
ENSMUSG00000004698	Hdac9	79221	1463.21	-0.0625291	0.0573913	-1.08952	0.275924	0.999886
ENSMUSG00000004707	Ly9	17085	46.0515	0.0986099	0.240394	0.410201	0.681659	0.999886
ENSMUSG00000004709	Cd244a	18106	10.625	0.686106	0.396992	1.72826	0.0839412	0.999886
ENSMUSG00000004730	Adgre1	13733	255.278	0.0925523	0.132958	0.696101	0.486365	0.999886
ENSMUSG00000004748	Mtfp1	67900	2277.92	0.10176	0.0678119	1.50063	0.133451	0.999886
ENSMUSG00000004768	Rab23	19335	1326.97	0.032009	0.033102	0.96698	0.333554	0.999886
ENSMUSG00000004771	Rab11a	53869	4759.87	-0.00809779	0.0522399	-0.155012	0.876812	0.999886
ENSMUSG00000004788	Eif2b2	217715	1098.45	0.0368895	0.056378	0.654324	0.512903	0.999886
ENSMUSG00000004789	Dlst	78920	5161.53	-0.0079554	0.0300771	-0.2645	0.791394	0.999886
ENSMUSG00000004791	Pgf	18654	110.416	0.011227	0.101714	0.110378	0.912109	0.999886
ENSMUSG00000004798	Ulk2	29869	4949.13	-0.011313	0.0401898	-0.281488	0.778336	0.999886
ENSMUSG00000004814	Ccl24	56221	5.0072	0.0400961	0.341814	0.117304	0.906619	0.999886
ENSMUSG00000004815	Dgkq	110524	2328.07	-0.00372124	0.0497424	-0.0748102	0.940366	0.999886
ENSMUSG00000004837	Grap	71520	132.61	-0.0432179	0.0896	-0.482343	0.629563	0.999886
ENSMUSG00000004842	Pou1f1	18736	20.6732	-0.41611	0.276422	-1.50534	0.132236	0.999886
ENSMUSG00000004843	Chmp2b	68942	2208.99	-0.0286409	0.0486116	-0.589178	0.555742	0.999886
ENSMUSG00000004846	Plod3	26433	1151.18	0.040186	0.0584825	0.687145	0.491992	0.999886
ENSMUSG00000004849	Ap1s1	11769	8602.32	0.0922999	0.0793105	1.16378	0.244513	0.999886
ENSMUSG00000004864	Mapk13	26415	25.6638	0.0984038	0.168927	0.582523	0.560214	0.999886
ENSMUSG00000004865	Srpk1	20815	3644.55	-0.0549496	0.0365344	-1.50405	0.132568	0.999886
ENSMUSG00000004872	Pax3	18505	11.546	-0.00466786	0.347532	-0.0134315	0.989284	0.999886
ENSMUSG00000004880	Lbr	98386	514.695	-0.0157222	0.054813	-0.286833	0.77424	0.999886
ENSMUSG00000004885	Crabp2	12904	114.424	0.0885857	0.177801	0.49823	0.618322	0.999886
ENSMUSG00000004891	Nes	18008	513.868	-0.0463154	0.102322	-0.452645	0.650805	0.999886
ENSMUSG00000004892	Bcan	12032	10155.8	-0.111676	0.0678196	-1.64666	0.0996283	0.999886
ENSMUSG00000004894	Hapln2	73940	1172.95	0.00621932	0.123622	0.0503091	0.959876	0.999886
ENSMUSG00000004895	Prcc	94315	1579.76	0.0774151	0.0629316	1.23015	0.218643	0.999886
ENSMUSG00000004896	Rrnad1	229503	1247.61	-0.0363886	0.0498452	-0.730033	0.46537	0.999886
ENSMUSG00000004897	Hdgf	15191	5664.13	-0.016959	0.0500346	-0.338946	0.73465	0.999886
ENSMUSG00000004902	Slc25a18	71803	2031.49	-0.0267549	0.0679824	-0.393557	0.693908	0.999886
ENSMUSG00000004929	Thop1	50492	1760.16	-0.00796375	0.0593961	-0.134079	0.89334	0.999886
ENSMUSG00000004931	Apba3	57267	619.023	0.0315757	0.0759557	0.415712	0.677621	0.999886
ENSMUSG00000004933	Matk	17179	7323.41	0.0328819	0.0780305	0.421398	0.673465	0.999886
ENSMUSG00000004934	Pias4	59004	909.372	0.0331912	0.0521868	0.636007	0.524772	0.999886
ENSMUSG00000004936	Map2k1	26395	10964.1	0.0515918	0.0543884	0.94858	0.342834	0.999886
ENSMUSG00000004937	Sgta	52551	4109.49	0.0287565	0.0661489	0.434724	0.663763	0.999886
ENSMUSG00000004939	Nmrk2	69564	7.89678	-0.198608	0.279268	-0.711173	0.476977	0.999886
ENSMUSG00000004945	Tmem242	70544	1482.82	0.0426212	0.0636486	0.669633	0.503092	0.999886
ENSMUSG00000004947	Dtx2	74198	385.987	0.00927041	0.0592052	0.156581	0.875575	0.999886
ENSMUSG00000004948	Zp3	22788	1.86863	-0.418053	0.593696	-0.704154	0.481337	0.999886
ENSMUSG00000004951	Hspb1	15507	97.333	-0.0086469	0.177691	-0.0486627	0.961188	0.999886
ENSMUSG00000004952	Rasa4	54153	487.013	-0.0346498	0.089789	-0.385902	0.699569	0.999886
ENSMUSG00000004961	Syt5	53420	4978.89	0.0876209	0.0685889	1.27748	0.201433	0.999886
ENSMUSG00000004980	Hnrnpa2b1	53379	20684.9	-0.0635225	0.0398656	-1.59342	0.111067	0.999886
ENSMUSG00000004988	Fxyd4	108017	44.8838	0.101455	0.177946	0.570145	0.568579	0.999886
ENSMUSG00000004994	Ccdc130	67736	432.575	0.0423594	0.0575636	0.73587	0.46181	0.999886
ENSMUSG00000004996	Mri1	67873	470.671	-0.205625	0.146614	-1.4025	0.160767	0.999886
ENSMUSG00000005034	Prkacb	18749	21230.7	0.0144329	0.0653724	0.220779	0.825264	0.999886
ENSMUSG00000005043	Sgsh	27029	289.099	0.00111333	0.089464	0.0124445	0.990071	0.999886
ENSMUSG00000005045	Chd5	269610	16984.9	0.0178163	0.0723221	0.246346	0.805414	0.999886
ENSMUSG00000005054	Cstb	13014	582.604	0.0657185	0.0630732	1.04194	0.297439	0.999886
ENSMUSG00000005057	Sh2b2	23921	228.748	0.103047	0.0767606	1.34244	0.179453	0.999886
ENSMUSG00000005069	Pex5	19305	2351.92	0.0109788	0.0477644	0.229854	0.818205	0.999886
ENSMUSG00000005078	Jkamp	104771	1461.31	-0.0346852	0.0448552	-0.77327	0.439363	0.999886
ENSMUSG00000005102	Eif2ak4	27103	1507.9	-0.00916704	0.0409409	-0.223909	0.822828	0.999886
ENSMUSG00000005103	Wdr1	22388	5884.89	0.0365915	0.0450994	0.811353	0.417163	0.999886
ENSMUSG00000005107	Slc2a9	117591	51.2648	-0.0247534	0.114151	-0.216848	0.828327	0.999886
ENSMUSG00000005125	Ndrg1	17988	2816.53	-0.0469547	0.0767366	-0.611895	0.540607	0.999886
ENSMUSG00000005131	4930550C14Rik	75311	9.49067	-0.0537219	0.228394	-0.235216	0.814041	0.999886
ENSMUSG00000005142	Man2b1	17159	1923.81	0.0175041	0.0878207	0.199317	0.842015	0.999886
ENSMUSG00000005148	Klf5	12224	182.764	0.116598	0.0997768	1.16859	0.242569	0.999886
ENSMUSG00000005150	Wdr83	67836	755.223	-0.0256107	0.0528611	-0.484491	0.628038	0.999886
ENSMUSG00000005161	Prdx2	21672	5535.77	0.0513974	0.0635881	0.808286	0.418926	0.999886
ENSMUSG00000005198	Polr2a	20020	3710.53	0.0728016	0.0760481	0.95731	0.338411	0.999886
ENSMUSG00000005202	Shbg	20415	1.90691	0.34097	0.656528	0.519353	0.603515	0.999886
ENSMUSG00000005204	Senp3	80886	2941.26	-0.026711	0.0307421	-0.868873	0.384916	0.999886
ENSMUSG00000005220	Corin	53419	18.546	-0.330523	0.182209	-1.81397	0.0696819	0.999886
ENSMUSG00000005225	Plekha8	231999	751.737	-0.0195238	0.0451111	-0.432792	0.665166	0.999886
ENSMUSG00000005233	Spc25	66442	20.6257	0.0147359	0.1522	0.0968193	0.92287	0.999886
ENSMUSG00000005251	Ripk4	72388	45.3802	0.0253543	0.152787	0.165946	0.868199	0.999886
ENSMUSG00000005262	Ufd1	22230	2686.88	0.0310018	0.0379843	0.816172	0.414402	0.999886
ENSMUSG00000005267	Zfp287	170740	612.617	-0.112947	0.0597193	-1.8913	0.0585838	0.999886
ENSMUSG00000005268	Prlr	19116	343.044	-0.377208	0.185815	-2.03002	0.0423543	0.999886
ENSMUSG00000005299	Letm1	56384	3764.42	0.0362607	0.0426858	0.849479	0.395615	0.999886
ENSMUSG00000005312	Ubqln1	56085	8080.89	-0.00290329	0.0361015	-0.0804203	0.935903	0.999886
ENSMUSG00000005320	Fgfr4	14186	18.4497	-0.30232	0.22614	-1.33687	0.181266	0.999886
ENSMUSG00000005338	Cadm3	94332	17180.1	0.0640192	0.0473201	1.3529	0.176089	0.999886
ENSMUSG00000005354	Txn2	56551	3368.86	9.78382e-06	0.0683255	0.000143194	0.999886	0.999886
ENSMUSG00000005362	Crbn	58799	2438.68	0.0210382	0.0665831	0.31597	0.752026	0.999886
ENSMUSG00000005364	Il5ra	16192	2.01756	0.924123	0.508077	1.81886	0.0689324	0.999886
ENSMUSG00000005370	Msh6	17688	872.42	0.00512489	0.0495489	0.103431	0.917621	0.999886
ENSMUSG00000005371	Fbxo11	225055	5829.43	-0.00377871	0.0355271	-0.106361	0.915296	0.999886
ENSMUSG00000005373	Mlxipl	58805	166.727	0.127077	0.105919	1.19976	0.230234	0.999886
ENSMUSG00000005374	Tbl2	27368	1198.37	0.0479158	0.0339918	1.40963	0.15865	0.999886
ENSMUSG00000005378	Bud23	66138	942.883	-0.0320021	0.0448233	-0.71396	0.475252	0.999886
ENSMUSG00000005397	Nid1	18073	323.834	-0.0877277	0.14837	-0.591276	0.554336	0.999886
ENSMUSG00000005410	Mcm5	17218	206.652	-0.0978926	0.0753812	-1.29863	0.194069	0.999886
ENSMUSG00000005413	Hmox1	15368	196.409	0.216407	0.112	1.9322	0.0533346	0.999886
ENSMUSG00000005417	Mprip	26936	14617.3	-0.000963388	0.0481021	-0.020028	0.984021	0.999886
ENSMUSG00000005442	Cic	71722	7843.7	0.0367676	0.0593744	0.61925	0.535752	0.999886
ENSMUSG00000005447	Pafah1b3	18476	401.256	0.158646	0.0860779	1.84305	0.0653216	0.999886
ENSMUSG00000005465	Il27ra	50931	20.6772	-0.12187	0.180407	-0.675525	0.499342	0.999886
ENSMUSG00000005469	Prkaca	18747	7948.25	0.0943541	0.0600433	1.57144	0.116082	0.999886
ENSMUSG00000005470	Asf1b	66929	30.0499	0.023534	0.128895	0.182583	0.855125	0.999886
ENSMUSG00000005474	Myl10	59310	1.10487	0.298537	0.836931	0.356704	0.721313	0.999886
ENSMUSG00000005481	Ddx39	68278	646.881	-0.0121309	0.0542169	-0.223748	0.822954	0.999886
ENSMUSG00000005483	Dnajb1	81489	2107.38	0.0609057	0.0767347	0.793718	0.427359	0.999886
ENSMUSG00000005493	Msh4	55993	6.85128	-0.25506	0.269346	-0.946961	0.343659	0.999886
ENSMUSG00000005501	Usp40	227334	1128.54	-0.0238446	0.0507027	-0.470283	0.638153	0.999886
ENSMUSG00000005505	Kbtbd4	67136	247.731	0.0953189	0.0739766	1.2885	0.197572	0.999886
ENSMUSG00000005506	Celf1	13046	11268.4	-0.0540061	0.0443752	-1.21703	0.223592	0.999886
ENSMUSG00000005510	Ndufs3	68349	2844.19	0.00822309	0.0440875	0.186517	0.852039	0.999886
ENSMUSG00000005514	Por	18984	2477.19	0.110286	0.0555217	1.98637	0.0469928	0.999886
ENSMUSG00000005533	Igf1r	16001	1115.11	-0.0249121	0.111166	-0.224099	0.82268	0.999886
ENSMUSG00000005534	Insr	16337	2994.05	-0.0334493	0.0473355	-0.706643	0.479789	0.999886
ENSMUSG00000005540	Fcer2a	14128	62.5803	-0.105634	0.129389	-0.816407	0.414268	0.999886
ENSMUSG00000005547	Cyp2a5	13087	41.8225	0.110626	0.724148	0.152768	0.878581	0.999886
ENSMUSG00000005553	Atp4a	11944	31.9141	0.0359091	0.152907	0.234843	0.814331	0.999886
ENSMUSG00000005566	Trim28	21849	4947.49	0.0912599	0.0539522	1.6915	0.090742	0.999886
ENSMUSG00000005575	Ube2m	22192	4417.98	0.0212667	0.0626938	0.339215	0.734448	0.999886
ENSMUSG00000005580	Adcy9	11515	2428.52	0.0646658	0.098323	0.657688	0.510739	0.999886
ENSMUSG00000005583	Mef2c	17260	19530.4	-0.0735398	0.083843	-0.877113	0.380425	0.999886
ENSMUSG00000005609	Ctr9	22083	2452.36	0.0162868	0.0312364	0.521405	0.602085	0.999886
ENSMUSG00000005610	Eif4g2	13690	25614.3	-0.0192652	0.039015	-0.49379	0.621454	0.999886
ENSMUSG00000005611	Mrvi1	17540	174.193	0.00394029	0.126604	0.0311229	0.975172	0.999886
ENSMUSG00000005615	Pcyt1a	13026	1629.32	-0.025948	0.0372231	-0.697093	0.485745	0.999886
ENSMUSG00000005621	Zfp592	233410	1537.04	0.00291108	0.0483555	0.0602015	0.951995	0.999886
ENSMUSG00000005625	Psmd4	19185	3583.5	0.0729313	0.0525876	1.38685	0.165486	0.999886
ENSMUSG00000005628	Tmod4	50874	38.2628	0.185052	0.250409	0.738999	0.459908	0.999886
ENSMUSG00000005640	Insrr	23920	53.9288	-0.0599915	0.18545	-0.323492	0.746323	0.999886
ENSMUSG00000005649	Cabp5	29865	6.21146	-0.50455	0.32446	-1.55504	0.119935	0.999886
ENSMUSG00000005656	Snx6	72183	1521.99	-0.0375778	0.0486914	-0.771755	0.44026	0.999886
ENSMUSG00000005667	Mthfd2	17768	270.292	0.0973353	0.0737392	1.31999	0.186837	0.999886
ENSMUSG00000005672	Kit	16590	1686.12	0.010627	0.0653262	0.162676	0.870773	0.999886
ENSMUSG00000005674	Tomm40l	641376	754.829	0.018011	0.063371	0.284216	0.776245	0.999886
ENSMUSG00000005677	Nr1i3	12355	4.70479	-0.113894	0.355524	-0.320355	0.748699	0.999886
ENSMUSG00000005681	Apoa2	11807	13.2699	-0.0105445	0.620393	-0.0169965	0.986439	0.999886
ENSMUSG00000005682	Pan2	103135	1281.11	-0.0259538	0.0534338	-0.485719	0.627167	0.999886
ENSMUSG00000005683	Cs	12974	9818.51	0.0208004	0.0449192	0.463062	0.64332	0.999886
ENSMUSG00000005686	Ampd3	11717	1149.7	-0.00234605	0.0439672	-0.0533591	0.957446	0.999886
ENSMUSG00000005687	Bcas2	68183	2423.69	0.00946673	0.0348561	0.271594	0.785934	0.999886
ENSMUSG00000005696	Sh2d1a	20400	5.20963	0.129037	0.313833	0.411165	0.680952	0.999886
ENSMUSG00000005698	Ctcf	13018	2877.01	-0.0149258	0.0337954	-0.441652	0.658741	0.999886
ENSMUSG00000005699	Pard6a	56513	738.762	0.02878	0.0758516	0.379425	0.704372	0.999886
ENSMUSG00000005705	Agrp	11604	51.7533	-0.116795	0.138751	-0.841757	0.399924	0.999886
ENSMUSG00000005716	Pvalb	19293	2475.54	-0.171316	0.0831187	-2.0611	0.0392931	0.999886
ENSMUSG00000005718	Tfap4	83383	162.461	0.0376617	0.0674902	0.558033	0.576822	0.999886
ENSMUSG00000005732	Ranbp1	19385	1850.91	-0.00254953	0.0512006	-0.049795	0.960286	0.999886
ENSMUSG00000005763	Cd247	12503	11.88	-0.147256	0.252082	-0.58416	0.559113	0.999886
ENSMUSG00000005774	Rfx5	53970	642.821	-0.103266	0.0522778	-1.97534	0.0482299	0.999886
ENSMUSG00000005779	Psmb4	19172	4055	0.0630579	0.0715626	0.881158	0.378233	0.999886
ENSMUSG00000005800	Mmp8	17394	3.97084	1.10215	0.621887	1.77226	0.0763506	0.999886
ENSMUSG00000005802	Slc30a4	22785	2996.7	-0.0332322	0.061698	-0.538626	0.590145	0.999886
ENSMUSG00000005803	Sqor	59010	192.837	0.136829	0.0907246	1.50818	0.131507	0.999886
ENSMUSG00000005804	Bloc1s6	18457	1389.68	0.0223614	0.0888753	0.251605	0.801347	0.999886
ENSMUSG00000005813	Metap1	75624	1657.6	0.0435116	0.0389216	1.11793	0.263597	0.999886
ENSMUSG00000005823	Gpr108	78308	989.079	0.0212987	0.0423646	0.502748	0.615142	0.999886
ENSMUSG00000005824	Tnfsf14	50930	0.702225	1.43731	0.971538	1.47942	0.139028	0.999886
ENSMUSG00000005836	Gata6	14465	3.19426	-0.234046	0.428497	-0.546203	0.584926	0.999886
ENSMUSG00000005846	Rsl1d1	66409	1979.8	-0.00917889	0.0416218	-0.220531	0.825458	0.999886
ENSMUSG00000005864	Cnga2	12789	18.6512	-0.300894	0.377886	-0.796256	0.425883	0.999886
ENSMUSG00000005871	Apc	11789	13567.7	-0.090189	0.0669766	-1.34658	0.178117	0.999886
ENSMUSG00000005873	Reep5	13476	15121	0.019151	0.0363726	0.526522	0.598526	0.999886
ENSMUSG00000005881	Ergic3	66366	3505.56	0.0891412	0.0623171	1.43044	0.15259	0.999886
ENSMUSG00000005882	Uqcc1	56046	1724.22	-0.0119935	0.0800782	-0.149772	0.880944	0.999886
ENSMUSG00000005883	Spo11	26972	24.8242	0.0601892	0.191126	0.314919	0.752823	0.999886
ENSMUSG00000005886	Ncoa2	17978	4550.99	-0.0208571	0.0530508	-0.393154	0.694206	0.999886
ENSMUSG00000005892	Trh	22044	413.102	0.0732846	0.189824	0.386066	0.699448	0.999886
ENSMUSG00000005893	Nr2c2	22026	2528.39	-0.00212718	0.095458	-0.0222839	0.982221	0.999886
ENSMUSG00000005897	Nr2c1	22025	434.945	-0.0351209	0.048439	-0.725054	0.468419	0.999886
ENSMUSG00000005899	Smpd4	77626	3367.46	0.0039769	0.0552227	0.0720158	0.942589	0.999886
ENSMUSG00000005907	Pex1	71382	1033.97	-0.0175394	0.0432347	-0.40568	0.684978	0.999886
ENSMUSG00000005917	Otx1	18423	183.243	-0.0631712	0.0612318	-1.03167	0.302225	0.999886
ENSMUSG00000005936	Kctd20	66989	3227.47	0.0450942	0.0299031	1.50801	0.131551	0.999886
ENSMUSG00000005947	Itgae	16407	18.7201	0.0529724	0.166489	0.318174	0.750353	0.999886
ENSMUSG00000005949	Ctns	83429	712.608	0.00915967	0.0428027	0.213998	0.830549	0.999886
ENSMUSG00000005950	P2rx5	94045	90.7338	0.012763	0.109294	0.116777	0.907037	0.999886
ENSMUSG00000005951	Shpk	74637	196.464	-0.0488817	0.0662635	-0.737687	0.460705	0.999886
ENSMUSG00000005952	Trpv1	193034	9.9739	0.107995	0.238591	0.452639	0.650809	0.999886
ENSMUSG00000005958	Ephb3	13845	862.011	-0.0511067	0.0745568	-0.685474	0.493045	0.999886
ENSMUSG00000005968	Tuft1	22156	128.372	-0.0467279	0.0918059	-0.508986	0.610762	0.999886
ENSMUSG00000005973	Rcn1	19672	1399.52	-0.0111872	0.0906261	-0.123444	0.901756	0.999886
ENSMUSG00000005980	Dnase1	13419	265.281	-0.0461532	0.0643884	-0.716794	0.473501	0.999886
ENSMUSG00000005981	Trap1	68015	2541.94	0.0389785	0.0353982	1.10114	0.270835	0.999886
ENSMUSG00000005982	Naa60	74763	2229.32	0.0200155	0.0534649	0.374368	0.708131	0.999886
ENSMUSG00000005983	1700037C18Rik	73261	191.702	0.0206454	0.0842602	0.24502	0.806441	0.999886
ENSMUSG00000005986	Ankrd13d	68423	2636.9	-0.00904361	0.0540968	-0.167175	0.867233	0.999886
ENSMUSG00000005994	Tyrp1	22178	13.8076	-0.116989	0.325896	-0.358977	0.719612	0.999886
ENSMUSG00000006005	Tpr	108989	4458.86	0.0225756	0.0679667	0.332157	0.739771	0.999886
ENSMUSG00000006010	Odr4	226499	2069.93	-0.061563	0.0475358	-1.29509	0.19529	0.999886
ENSMUSG00000006014	Prg4	96875	347.859	-0.0812427	0.310754	-0.261437	0.793755	0.999886
ENSMUSG00000006019	Dhx34	71723	653.468	0.0258183	0.0633024	0.407856	0.68338	0.999886
ENSMUSG00000006021	Kptn	70394	1062.73	0.0722456	0.0667635	1.08211	0.279202	0.999886
ENSMUSG00000006024	Napa	108124	8186.6	0.0305556	0.0522502	0.584795	0.558686	0.999886
ENSMUSG00000006050	Sra1	24068	2859.38	0.0349432	0.0407652	0.857182	0.391344	0.999886
ENSMUSG00000006056	Calcoco2	76815	1.72171	-0.0246609	0.599622	-0.0411275	0.967194	0.999886
ENSMUSG00000006057	Atp5g1	11951	957.913	0.163113	0.102408	1.59278	0.11121	0.999886
ENSMUSG00000006058	Snf8	27681	2492.52	-0.00120017	0.0654045	-0.0183499	0.98536	0.999886
ENSMUSG00000006095	Tbcb	66411	2026.8	0.0802825	0.0645183	1.24434	0.213376	0.999886
ENSMUSG00000006134	Crkl	12929	1781.3	0.0541323	0.0647922	0.835475	0.40345	0.999886
ENSMUSG00000006143	Upk3bl	69665	10.632	-0.0011457	0.26158	-0.00437992	0.996505	0.999886
ENSMUSG00000006154	Eps8l1	67425	397.575	-0.591156	0.30226	-1.95578	0.0504905	0.999886
ENSMUSG00000006169	Clint1	216705	2335.2	0.0312792	0.0456292	0.685508	0.493023	0.999886
ENSMUSG00000006179	Prss16	54373	39.5172	-0.328059	0.188667	-1.73882	0.0820661	0.999886
ENSMUSG00000006191	Cdkal1	68916	492.581	-0.0130219	0.0462294	-0.28168	0.778189	0.999886
ENSMUSG00000006205	Htra1	56213	3727.13	-0.130417	0.084262	-1.54775	0.121681	0.999886
ENSMUSG00000006215	Zbtb17	22642	1407.29	0.00114622	0.0634731	0.0180583	0.985592	0.999886
ENSMUSG00000006216	Clcnkb	56365	0.923522	-0.141398	0.748937	-0.188798	0.850251	0.999886
ENSMUSG00000006218	Fam131c	277743	160.826	0.109388	0.124224	0.880573	0.378549	0.999886
ENSMUSG00000006219	Fblim1	74202	61.6435	-0.125141	0.148992	-0.839913	0.400957	0.999886
ENSMUSG00000006221	Hspb7	29818	13.0633	-0.178523	0.201229	-0.887162	0.374992	0.999886
ENSMUSG00000006235	Epor	13857	246.338	-0.0302977	0.0861609	-0.351641	0.725108	0.999886
ENSMUSG00000006241	Ccdc159	67119	546.369	0.00716896	0.0612021	0.117136	0.906752	0.999886
ENSMUSG00000006262	Mob1b	68473	1695.16	-0.0621329	0.0589443	-1.0541	0.291839	0.999886
ENSMUSG00000006269	Atp6v1b1	110935	23.6639	-0.355396	0.228899	-1.55263	0.120511	0.999886
ENSMUSG00000006270	Vax1	22326	28.6817	0.0438565	0.137924	0.317976	0.750503	0.999886
ENSMUSG00000006273	Atp6v1b2	11966	25894.7	0.0691247	0.0618313	1.11796	0.263586	0.999886
ENSMUSG00000006276	Eps15l1	13859	2277.87	0.0180355	0.0371689	0.485231	0.627513	0.999886
ENSMUSG00000006281	Tep1	21745	410	-0.00206621	0.0792696	-0.0260656	0.979205	0.999886
ENSMUSG00000006288	Ttc5	219022	1440.77	0.0105904	0.0415628	0.254805	0.798874	0.999886
ENSMUSG00000006289	Osgep	66246	956.726	-0.0158961	0.0433485	-0.366705	0.713839	0.999886
ENSMUSG00000006299	Aamp	227290	3488.04	0.0682125	0.0568491	1.19989	0.230184	0.999886
ENSMUSG00000006301	Tmbim1	69660	1652.69	-0.0832946	0.0521475	-1.59729	0.110201	0.999886
ENSMUSG00000006304	Arpc2	76709	5906.05	0.00950838	0.0429846	0.221204	0.824933	0.999886
ENSMUSG00000006307	Kmt2b	75410	4145.17	-0.0224334	0.0683461	-0.328233	0.742736	0.999886
ENSMUSG00000006310	Zbtb32	58206	84.3303	0.00127474	0.0903885	0.0141028	0.988748	0.999886
ENSMUSG00000006313	Upk1a	109637	29.0102	0.0632159	0.162414	0.389227	0.697108	0.999886
ENSMUSG00000006315	Tmem147	69804	1923.89	0.0676532	0.0639889	1.05726	0.290391	0.999886
ENSMUSG00000006333	Rps9	76846	5923.22	0.0510694	0.079965	0.638647	0.523052	0.999886
ENSMUSG00000006335	Tfpt	69714	685.156	-0.0411351	0.0532625	-0.772309	0.439931	0.999886
ENSMUSG00000006342	Susd2	71733	649.636	0.128087	0.0941472	1.3605	0.173673	0.999886
ENSMUSG00000006344	Ggt5	23887	87.1013	0.00551929	0.0944656	0.0584265	0.953409	0.999886
ENSMUSG00000006345	Ggt1	14598	65.4711	-0.0260185	0.102465	-0.253925	0.799554	0.999886
ENSMUSG00000006356	Crip2	68337	2610.19	0.043625	0.0833103	0.523645	0.600526	0.999886
ENSMUSG00000006360	Crip1	12925	96.6586	-0.00210335	0.122593	-0.0171572	0.986311	0.999886
ENSMUSG00000006362	Cbfa2t3	12398	1083.95	0.114026	0.100628	1.13315	0.257153	0.999886
ENSMUSG00000006369	Fbln1	14114	386.207	0.114842	0.151634	0.757363	0.448832	0.999886
ENSMUSG00000006373	Pgrmc1	53328	12119	0.0909997	0.044001	2.06813	0.038628	0.999886
ENSMUSG00000006378	Gcat	26912	368.145	0.0909367	0.0757434	1.20059	0.229911	0.999886
ENSMUSG00000006386	Tek	21687	348.552	-0.192967	0.140434	-1.37407	0.169418	0.999886
ENSMUSG00000006390	Elovl1	54325	563.032	-0.0215436	0.0872618	-0.246885	0.804997	0.999886
ENSMUSG00000006392	Med8	80509	784.347	-0.0770575	0.0849193	-0.907421	0.364184	0.999886
ENSMUSG00000006395	Hyi	68180	318.78	-0.0461953	0.121371	-0.380612	0.703491	0.999886
ENSMUSG00000006398	Cdc20	107995	34.6516	-0.0114579	0.116761	-0.0981316	0.921828	0.999886
ENSMUSG00000006403	Adamts4	240913	831.126	-0.198586	0.119126	-1.66703	0.0955088	0.999886
ENSMUSG00000006411	Nectin4	71740	286.951	0.130031	0.0828249	1.56995	0.116426	0.999886
ENSMUSG00000006412	Pfdn2	18637	2449.02	0.0527106	0.0515819	1.02188	0.306837	0.999886
ENSMUSG00000006418	Rnf114	81018	2339.74	0.0234707	0.0379026	0.619237	0.53576	0.999886
ENSMUSG00000006423	C330007P06Rik	77644	1752.36	-0.0599351	0.0526969	-1.13735	0.25539	0.999886
ENSMUSG00000006435	Neurl1a	18011	7262.77	-0.0612342	0.0575145	-1.06467	0.287023	0.999886
ENSMUSG00000006442	Srm	20810	1537.5	0.0141725	0.0775247	0.182812	0.854945	0.999886
ENSMUSG00000006445	Epha2	13836	45.5992	0.0364105	0.151119	0.240939	0.809603	0.999886
ENSMUSG00000006456	Rbm14	56275	848.688	-0.0591995	0.0539482	-1.09734	0.272493	0.999886
ENSMUSG00000006457	Actn3	11474	59.7727	-0.0842778	0.112338	-0.750215	0.453125	0.999886
ENSMUSG00000006462	A530013C23Rik	329562	13.4898	0.0161796	0.232025	0.0697321	0.944407	0.999886
ENSMUSG00000006463	Zdhhc24	70605	927.156	-0.00318416	0.0325419	-0.0978481	0.922053	0.999886
ENSMUSG00000006464	Bbs1	52028	2175.76	-0.0116998	0.0450206	-0.259877	0.794959	0.999886
ENSMUSG00000006469	Slc34a3	142681	10.9251	0.30729	0.286133	1.07394	0.282848	0.999886
ENSMUSG00000006471	Ndor1	78797	1638.34	-0.0151397	0.0576659	-0.262541	0.792905	0.999886
ENSMUSG00000006476	Nsmf	56876	19078.9	0.0226356	0.0637074	0.355305	0.722361	0.999886
ENSMUSG00000006494	Pdk1	228026	2897.71	0.0451723	0.0564634	0.800029	0.423694	0.999886
ENSMUSG00000006498	Ptbp1	19205	1026.96	-0.0594626	0.0510837	-1.16402	0.244414	0.999886
ENSMUSG00000006517	Mvd	192156	777.155	0.178699	0.0932411	1.91653	0.0552978	0.999886
ENSMUSG00000006519	Cyba	13057	235.677	0.158131	0.111632	1.41654	0.156617	0.999886
ENSMUSG00000006522	Itih3	16426	2409.28	0.0587161	0.147238	0.398785	0.690052	0.999886
ENSMUSG00000006527	Sfmbt1	54650	1829.5	0.0501435	0.0408754	1.22674	0.219921	0.999886
ENSMUSG00000006538	Ihh	16147	15.6184	0.101529	0.203719	0.498376	0.618219	0.999886
ENSMUSG00000006542	Prkag3	241113	7.3235	0.197565	0.267458	0.738677	0.460103	0.999886
ENSMUSG00000006546	Cryba2	12958	5.09586	0.105385	0.346507	0.304136	0.761024	0.999886
ENSMUSG00000006567	Atp7b	11979	165.791	0.0301125	0.0798564	0.377083	0.706112	0.999886
ENSMUSG00000006574	Slc4a1	20533	13.2068	-0.994008	0.522266	-1.90326	0.0570066	0.999886
ENSMUSG00000006575	Rundc3a	51799	12582.5	0.04212	0.0640265	0.657853	0.510633	0.999886
ENSMUSG00000006576	Slc4a3	20536	8925.15	0.0187703	0.0588831	0.318772	0.749899	0.999886
ENSMUSG00000006585	Cdt1	67177	66.8982	0.179403	0.110083	1.62971	0.103162	0.999886
ENSMUSG00000006586	Runx1t1	12395	1315.38	0.0237626	0.0578979	0.410422	0.681496	0.999886
ENSMUSG00000006587	Snai3	30927	22.8964	-0.145375	0.205644	-0.706926	0.479613	0.999886
ENSMUSG00000006589	Aprt	11821	734.732	0.0904076	0.0783753	1.15352	0.248696	0.999886
ENSMUSG00000006599	Gtf2h1	14884	1640.48	0.0186861	0.0360514	0.518319	0.604236	0.999886
ENSMUSG00000006611	Hfe	15216	166.451	0.144095	0.104756	1.37553	0.168967	0.999886
ENSMUSG00000006638	Abhd1	57742	19.3021	-0.00634458	0.213809	-0.0296741	0.976327	0.999886
ENSMUSG00000006641	Slc5a6	330064	1152.66	0.0688231	0.0522423	1.31738	0.18771	0.999886
ENSMUSG00000006642	Tcf23	69852	17.6461	0.0168129	0.247249	0.0679997	0.945786	0.999886
ENSMUSG00000006651	Aplp1	11803	42694.7	-0.00579676	0.0718971	-0.0806259	0.935739	0.999886
ENSMUSG00000006673	Qrich1	69232	2322.28	0.0542076	0.0343488	1.57815	0.114532	0.999886
ENSMUSG00000006675	P4htm	74443	2619.43	0.100202	0.0671924	1.49127	0.135891	0.999886
ENSMUSG00000006676	Usp19	71472	6358	0.00299215	0.0484516	0.0617555	0.950758	0.999886
ENSMUSG00000006678	Pola1	18968	221.153	0.0108519	0.0778371	0.139418	0.889119	0.999886
ENSMUSG00000006699	Cdc42	12540	11275.8	-0.0152229	0.0437266	-0.348138	0.727737	0.999886
ENSMUSG00000006705	Pknox1	18771	620.579	-0.0785848	0.0460746	-1.7056	0.0880828	0.999886
ENSMUSG00000006711	D130043K22Rik	210108	1796.44	0.0190242	0.0611175	0.311273	0.755593	0.999886
ENSMUSG00000006715	Gmnn	57441	142.528	-0.0204396	0.0822974	-0.248363	0.803854	0.999886
ENSMUSG00000006717	Acot13	66834	1389.14	0.0449711	0.0652593	0.689114	0.490751	0.999886
ENSMUSG00000006720	Zfp184	193452	118.877	0.0483274	0.0828118	0.583581	0.559502	0.999886
ENSMUSG00000006724	Cyp27b1	13115	37.0049	-0.131032	0.171993	-0.761843	0.446154	0.999886
ENSMUSG00000006728	Cdk4	12567	1432.46	-0.0470236	0.0427234	-1.10065	0.271048	0.999886
ENSMUSG00000006731	B4galnt1	14421	4310.84	0.0451265	0.0743414	0.607017	0.54384	0.999886
ENSMUSG00000006732	Mettl1	17299	382.347	0.0336202	0.0566296	0.593686	0.552722	0.999886
ENSMUSG00000006736	Tspan31	67125	1118.3	0.0133651	0.0408596	0.327097	0.743594	0.999886
ENSMUSG00000006740	Kif5b	16573	11126.5	-0.00392861	0.0621333	-0.0632287	0.949584	0.999886
ENSMUSG00000006763	Saal1	78935	489.761	-0.00427891	0.0432139	-0.099017	0.921125	0.999886
ENSMUSG00000006764	Tph2	216343	145.071	0.0119784	0.630277	0.0190049	0.984837	0.999886
ENSMUSG00000006777	Krt23	94179	14.6239	0.0208763	0.305959	0.0682323	0.945601	0.999886
ENSMUSG00000006782	Cnp	12799	11395.6	-0.106873	0.0723202	-1.47778	0.139467	0.999886
ENSMUSG00000006784	Ttc25	74407	123.138	-0.0296656	0.0799193	-0.371195	0.710493	0.999886
ENSMUSG00000006800	Sulf2	72043	3441.57	-0.0201931	0.0747478	-0.270149	0.787046	0.999886
ENSMUSG00000006818	Sod2	20656	7244.45	-0.0153465	0.0578335	-0.265356	0.790735	0.999886
ENSMUSG00000006850	Tmco6	71983	409.238	-0.0217504	0.0486838	-0.446769	0.655042	0.999886
ENSMUSG00000006906	Stambp	70527	1095.79	0.0320125	0.0414123	0.773021	0.43951	0.999886
ENSMUSG00000006930	Hap1	15114	11350.8	0.126212	0.0910778	1.38576	0.16582	0.999886
ENSMUSG00000006931	P3h4	66180	522.093	-0.0313322	0.062695	-0.499755	0.617247	0.999886
ENSMUSG00000006932	Ctnnb1	12387	16170.2	0.0392107	0.0547416	0.716287	0.473814	0.999886
ENSMUSG00000006941	Eif1b	68969	3205.75	0.112374	0.0594682	1.88964	0.0588059	0.999886
ENSMUSG00000006958	Chrd	12667	2056.1	0.0814864	0.0865326	0.941684	0.346354	0.999886
ENSMUSG00000006998	Psmd2	21762	8298.12	0.0456799	0.0519019	0.880119	0.378795	0.999886
ENSMUSG00000007021	Syngr3	20974	6547.3	0.0960972	0.0677777	1.41783	0.15624	0.999886
ENSMUSG00000007029	Vars	22321	2181.04	0.00127164	0.0610579	0.0208268	0.983384	0.999886
ENSMUSG00000007030	Vwa7	27762	63.0103	0.05873	0.195485	0.300432	0.763848	0.999886
ENSMUSG00000007033	Hspa1l	15482	77.7998	-0.0479522	0.0794137	-0.603828	0.545958	0.999886
ENSMUSG00000007034	Slc44a4	70129	19.6828	0.0491828	0.169668	0.289876	0.771911	0.999886
ENSMUSG00000007035	Msh5	17687	83.9	-0.146707	0.365547	-0.401335	0.688173	0.999886
ENSMUSG00000007036	Abhd16a	193742	3095.13	0.00127549	0.0537736	0.0237197	0.981076	0.999886
ENSMUSG00000007038	Neu1	18010	2174.62	0.0457993	0.0460537	0.994476	0.319991	0.999886
ENSMUSG00000007039	Ddah2	51793	361.972	-0.00183506	0.0793064	-0.0231388	0.98154	0.999886
ENSMUSG00000007041	Clic1	114584	361.42	0.173338	0.0893408	1.94018	0.0523574	0.999886
ENSMUSG00000007050	Lsm2	27756	273.505	0.00711531	0.0580706	0.122529	0.90248	0.999886
ENSMUSG00000007080	Pole	18973	102.172	0.0486275	0.0881097	0.551897	0.581019	0.999886
ENSMUSG00000007107	Atp1a4	27222	17.9301	0.0928988	0.215773	0.43054	0.666803	0.999886
ENSMUSG00000007122	Casq1	12372	39.5971	-0.04605	0.159049	-0.289533	0.772174	0.999886
ENSMUSG00000007207	Stx1a	20907	7246.91	0.0152534	0.0857551	0.177871	0.858824	0.999886
ENSMUSG00000007209	Ceacam9	26368	5.89444	0.0394075	0.278626	0.141435	0.887526	0.999886
ENSMUSG00000007216	Zfp775	243372	331.977	0.122423	0.0710611	1.72278	0.0849283	0.999886
ENSMUSG00000007279	Scube2	56788	77.1276	0.0176085	0.131781	0.133619	0.893704	0.999886
ENSMUSG00000007338	Mrpl49	18120	1347.63	0.0612784	0.0485355	1.26255	0.206752	0.999886
ENSMUSG00000007379	Dennd2c	329727	36.9579	0.18323	0.154065	1.18931	0.234319	0.999886
ENSMUSG00000007411	Mark3	17169	3025.28	0.0171212	0.0296991	0.576489	0.564285	0.999886
ENSMUSG00000007415	Gatad1	67210	2481.58	-0.00209589	0.0385065	-0.0544294	0.956593	0.999886
ENSMUSG00000007440	Pcdha11	12942	110.353	0.19211	0.178478	1.07638	0.28176	0.999886
ENSMUSG00000007458	M6pr	17113	3603.14	-0.014774	0.0331839	-0.445217	0.656163	0.999886
ENSMUSG00000007476	Lrrc8a	241296	691.594	0.0496485	0.0764681	0.649271	0.516163	0.999886
ENSMUSG00000007480	Mc5r	17203	12.9059	-0.0423802	0.224846	-0.188486	0.850496	0.999886
ENSMUSG00000007564	Ppp2r1a	51792	17621.5	0.0749265	0.0723953	1.03496	0.300685	0.999886
ENSMUSG00000007570	Fance	72775	688.196	0.0513607	0.0552081	0.930311	0.35221	0.999886
ENSMUSG00000007589	Tinf2	28113	424.901	0.0212183	0.046129	0.459977	0.645533	0.999886
ENSMUSG00000007591	Tssk4	71099	24.9885	-0.274102	0.146084	-1.87633	0.0606104	0.999886
ENSMUSG00000007594	Hapln4	330790	5352.72	0.109038	0.0997673	1.09292	0.274428	0.999886
ENSMUSG00000007603	Dus3l	224907	2735.06	0.0285386	0.0640306	0.445702	0.655813	0.999886
ENSMUSG00000007610	Gtpbp3	70359	1216.64	0.00273456	0.0536181	0.0510007	0.959325	0.999886
ENSMUSG00000007613	Tgfbr1	21812	1486.41	-0.0288868	0.0673099	-0.429161	0.667806	0.999886
ENSMUSG00000007617	Homer1	26556	6538.36	-0.17208	0.122225	-1.4079	0.159162	0.999886
ENSMUSG00000007646	Rad51c	114714	162.438	0.0356307	0.0672969	0.529455	0.59649	0.999886
ENSMUSG00000007653	Gabrb2	14401	4490.3	-0.040316	0.144897	-0.27824	0.780828	0.999886
ENSMUSG00000007655	Cav1	12389	461.36	-0.143168	0.0988346	-1.44857	0.147459	0.999886
ENSMUSG00000007656	Arpp19	59046	11962.4	-0.1475	0.0715725	-2.06085	0.0393175	0.999886
ENSMUSG00000007659	Bcl2l1	12048	3828.07	0.0574871	0.0584786	0.983046	0.325585	0.999886
ENSMUSG00000007670	Khsrp	16549	3852.55	0.00638341	0.0530247	0.120386	0.904178	0.999886
ENSMUSG00000007721	Ccdc124	234388	2349.58	0.000554337	0.093868	0.0059055	0.995288	0.999886
ENSMUSG00000007739	Cct4	12464	3870.45	0.0406114	0.0448374	0.905748	0.365069	0.999886
ENSMUSG00000007777	0610009B22Rik	66050	534.872	0.0342964	0.0621887	0.551489	0.581298	0.999886
ENSMUSG00000007783	Cpt1c	78070	4003.69	0.0853379	0.052351	1.63011	0.103078	0.999886
ENSMUSG00000007805	Twist2	13345	14.2123	-0.11912	0.208982	-0.570003	0.568676	0.999886
ENSMUSG00000007812	Zfp655	72611	1445.32	0.013584	0.0548224	0.247781	0.804304	0.999886
ENSMUSG00000007815	Rhoa	11848	3896.12	-0.0231888	0.0377649	-0.614029	0.539196	0.999886
ENSMUSG00000007817	Zmiz1	328365	5537.49	0.0552486	0.0742935	0.743653	0.457086	0.999886
ENSMUSG00000007827	Ankrd26	232339	1035.58	3.95214e-05	0.0700743	0.000563992	0.99955	0.999886
ENSMUSG00000007833	Aldh16a1	69748	271.516	0.0611596	0.0703441	0.869435	0.384609	0.999886
ENSMUSG00000007836	Hnrnpa0	77134	5208.61	0.00571752	0.0459098	0.124538	0.900889	0.999886
ENSMUSG00000007837	Prrg2	65116	176.119	0.031078	0.068168	0.455903	0.64846	0.999886
ENSMUSG00000007850	Hnrnph1	59013	11015	-0.0725494	0.0475643	-1.52529	0.127187	0.999886
ENSMUSG00000007867	Ift43	76411	249.326	-0.000832034	0.0738801	-0.0112619	0.991014	0.999886
ENSMUSG00000007872	Id3	15903	882.896	0.172344	0.0888521	1.93968	0.0524191	0.999886
ENSMUSG00000007877	Tcap	21393	118.774	-0.101281	0.155433	-0.651607	0.514655	0.999886
ENSMUSG00000007880	Arid1a	93760	6420.28	-0.0165458	0.0630366	-0.262479	0.792952	0.999886
ENSMUSG00000007888	Crlf1	12931	113.923	0.287731	0.139224	2.06667	0.038765	0.999886
ENSMUSG00000007891	Ctsd	13033	16551	0.126088	0.0859566	1.46688	0.142409	0.999886
ENSMUSG00000007892	Rplp1	56040	13505.8	0.0245773	0.0953681	0.25771	0.79663	0.999886
ENSMUSG00000007908	Hmgcll1	208982	828.476	0.0306783	0.0431034	0.711738	0.476627	0.999886
ENSMUSG00000007944	Ttc9b	73032	2534.44	-0.00723022	0.110407	-0.0654872	0.947786	0.999886
ENSMUSG00000007946	Phox2a	11859	1.31012	-0.764857	0.800205	-0.955826	0.33916	0.999886
ENSMUSG00000007950	Abhd8	64296	7750.06	0.105824	0.0638003	1.65867	0.0971828	0.999886
ENSMUSG00000007987	Ift22	67286	1406.83	0.0463684	0.0620745	0.74698	0.455075	0.999886
ENSMUSG00000007989	Fzd3	14365	944.531	-0.000550181	0.137679	-0.00399611	0.996812	0.999886
ENSMUSG00000008028	1700008O03Rik	69349	296.939	-0.0897011	0.0959629	-0.934748	0.349918	0.999886
ENSMUSG00000008035	Mid1ip1	68041	1938.45	0.0035634	0.0661234	0.0538901	0.957023	0.999886
ENSMUSG00000008036	Ap2s1	232910	4094.12	0.0465187	0.0754543	0.616515	0.537555	0.999886
ENSMUSG00000008129	4930432K21Rik	74666	153.187	0.170512	0.0965676	1.76572	0.0774425	0.999886
ENSMUSG00000008136	Fhl2	14200	1174.45	-0.0271709	0.0825927	-0.328975	0.742175	0.999886
ENSMUSG00000008140	Emc10	69683	6509.5	0.0992014	0.0926356	1.07088	0.284224	0.999886
ENSMUSG00000008153	Clstn3	232370	16017.5	0.0318707	0.0785528	0.405723	0.684946	0.999886
ENSMUSG00000008167	Fbxw9	68628	676.601	0.0670169	0.0622652	1.07632	0.281786	0.999886
ENSMUSG00000008193	Spib	272382	6.24578	-0.594381	0.475414	-1.25024	0.211212	0.999886
ENSMUSG00000008200	Fnbp4	55935	2568.44	-0.0444174	0.039991	-1.11069	0.266704	0.999886
ENSMUSG00000008206	Cers4	67260	3664.04	-0.0194512	0.0393443	-0.494384	0.621035	0.999886
ENSMUSG00000008226	Scrn3	74616	1329.79	1.92263e-05	0.0527761	0.0003643	0.999709	0.999886
ENSMUSG00000008301	Phax	56698	1440.98	0.0773795	0.0417056	1.85537	0.0635428	0.999886
ENSMUSG00000008305	Tle1	21885	1731.68	-0.030973	0.0348587	-0.888531	0.374255	0.999886
ENSMUSG00000008307	1700109H08Rik	77036	88.9615	-0.0231792	0.10587	-0.21894	0.826697	0.999886
ENSMUSG00000008318	Relt	320100	796.811	-0.0215078	0.0684819	-0.314065	0.753472	0.999886
ENSMUSG00000008333	Snrpb2	20639	928.893	-0.0789888	0.0672067	-1.17531	0.23987	0.999886
ENSMUSG00000008348	Ubc	22190	24507.3	0.0733763	0.0754245	0.972845	0.33063	0.999886
ENSMUSG00000008373	Prpf31	68988	1410.84	0.0196588	0.0384562	0.511199	0.609211	0.999886
ENSMUSG00000008384	Sertad1	55942	327.482	0.114122	0.0986849	1.15643	0.247505	0.999886
ENSMUSG00000008393	Carhsp1	52502	2002.18	-0.0577381	0.0677686	-0.851988	0.394221	0.999886
ENSMUSG00000008398	Elk3	13713	359.692	0.0257833	0.0596406	0.432311	0.665515	0.999886
ENSMUSG00000008429	Herpud2	80517	1684.36	-0.0179404	0.0401065	-0.447319	0.654645	0.999886
ENSMUSG00000008435	Rdh13	108841	1383.13	0.160104	0.121567	1.317	0.187839	0.999886
ENSMUSG00000008438	Adam21	56622	52.1476	-0.117227	0.100675	-1.16441	0.244258	0.999886
ENSMUSG00000008450	Nutf2	68051	655.257	-0.0414222	0.0521527	-0.794249	0.42705	0.999886
ENSMUSG00000008461	Fut1	14343	5.20204	0.459345	0.354279	1.29656	0.194781	0.999886
ENSMUSG00000008475	Arpc5	67771	3266.57	-0.00525619	0.0467936	-0.112327	0.910564	0.999886
ENSMUSG00000008482	Rnf151	67504	20.5067	0.101201	0.454404	0.222712	0.823759	0.999886
ENSMUSG00000008489	Elavl2	15569	3650.48	0.0196709	0.0742909	0.264783	0.791177	0.999886
ENSMUSG00000008496	Pou2f2	18987	617.297	-0.0782289	0.0627951	-1.24578	0.212845	0.999886
ENSMUSG00000008540	Mgst1	56615	311.341	0.106004	0.106588	0.994516	0.319972	0.999886
ENSMUSG00000008575	Nfib	18028	4019.9	-0.0438755	0.0433195	-1.01284	0.311139	0.999886
ENSMUSG00000008590	Htr3b	57014	1.10599	1.39654	0.780261	1.78983	0.0734809	0.999886
ENSMUSG00000008601	Rab25	53868	6.0196	-0.101225	0.310434	-0.326076	0.744367	0.999886
ENSMUSG00000008604	Ubqln4	94232	5526.94	-0.0185299	0.0460231	-0.402622	0.687226	0.999886
ENSMUSG00000008658	Rbfox1	268859	11202.9	-0.0867704	0.0492858	-1.76056	0.0783134	0.999886
ENSMUSG00000008668	Rps18	20084	2225.56	0.175467	0.426544	0.411368	0.680802	0.999886
ENSMUSG00000008682	Rpl10	110954	285.284	-0.0192492	0.0701961	-0.27422	0.783916	0.999886
ENSMUSG00000008683	Rps15a	267019	5586.81	0.0758692	0.0714867	1.06131	0.288551	0.999886
ENSMUSG00000008690	Ncaph2	52683	3947.7	0.0635958	0.0457062	1.39141	0.164102	0.999886
ENSMUSG00000008730	Hipk1	15257	6082.46	0.00829909	0.0416062	0.199468	0.841897	0.999886
ENSMUSG00000008734	Gprc5b	64297	7065.82	-0.0692066	0.0495977	-1.39536	0.162907	0.999886
[truncated: 30,572 more rows]
