# Supplementary material for: Microglia show differential transcriptomic response to Aβ peptide aggregates ex vivo and in vivo
Source: Life Sci Alliance. 2021 Jun 14;4(7):e202101108. doi: 10.26508/lsa.202101108 (PMC8321667; doi:10.26508/lsa.202101108)
Supplement: Supplementary file 36 [file LSA-2021-01108_TableS36.xlsx]

## Sheet: Sheet1
category	ontology	term	over_represented_pvalue	BHadjust	numDEInCat	numInCat	totalDEG	totalNum	enrichment
GO:0004866	MF	endopeptidase inhibitor activity	0.000103256	0.157806	3	190	11	21152	30.3617
GO:0061135	MF	endopeptidase regulator activity	0.000114985	0.160883	3	197	11	21152	29.2829
GO:0030414	MF	peptidase inhibitor activity	0.000121637	0.160883	3	201	11	21152	28.7001
GO:0061134	MF	peptidase regulator activity	0.000188559	0.211987	3	232	11	21152	24.8652
GO:0004857	MF	enzyme inhibitor activity	0.000758132	0.396433	3	370	11	21152	15.5912
GO:0030234	MF	enzyme regulator activity	0.0113739	1	3	943	11	21152	6.11742
GO:0098772	MF	molecular function regulator	0.0085968	0.95845	4	1699	11	21152	4.52716
GO:0005102	MF	signaling receptor binding	0.0448394	1	3	1594	11	21152	3.61903
