# Supplementary material for: Microglia show differential transcriptomic response to Aβ peptide aggregates ex vivo and in vivo
Source: Life Sci Alliance. 2021 Jun 14;4(7):e202101108. doi: 10.26508/lsa.202101108 (PMC8321667; doi:10.26508/lsa.202101108)
Supplement: Supplementary file 40 [file LSA-2021-01108_TableS40.xlsx]

## Sheet: Sheet1
GeneStableID	symbol	entrezid	baseMean	log2FoldChange	lfcSE	stat	pvalue	padj
ENSMUSG00000068129	Cst7	13011	213.32	5.03685	0.312095	16.1389	1.36047e-58	2.54706e-54
ENSMUSG00000079293	Clec7a	56644	92.1886	3.72603	0.31184	11.9485	6.60747e-33	6.18525e-29
ENSMUSG00000030505	Prmt3	71974	656.357	-0.790238	0.066358	-11.9087	1.06627e-32	6.65424e-29
ENSMUSG00000030579	Tyrobp	22177	819.29	1.61293	0.137917	11.6949	1.35307e-31	6.33306e-28
ENSMUSG00000000982	Ccl3	20302	32.2799	3.21182	0.288293	11.1408	7.93955e-29	2.97288e-25
ENSMUSG00000018774	Cd68	12514	466.053	1.19364	0.108382	11.0132	3.29932e-28	9.23199e-25
ENSMUSG00000023992	Trem2	83433	911.571	1.38234	0.125562	11.0092	3.45176e-28	9.23199e-25
ENSMUSG00000030789	Itgax	16411	154.676	2.99148	0.287125	10.4187	2.03618e-25	4.76516e-22
ENSMUSG00000018927	Ccl6	20305	91.6746	2.38963	0.243418	9.81698	9.51475e-23	1.97928e-19
ENSMUSG00000041515	Irf8	15900	296.203	0.881166	0.0901459	9.77488	1.44322e-22	2.70199e-19
ENSMUSG00000024737	Slc15a3	65221	131.589	1.13326	0.122688	9.23691	2.53721e-20	4.31834e-17
ENSMUSG00000018930	Ccl4	20303	16.0259	3.38275	0.367531	9.20399	3.44905e-20	5.38109e-17
ENSMUSG00000052142	Rasal3	320484	178.206	0.985681	0.110531	8.91769	4.76101e-19	6.85659e-16
ENSMUSG00000046805	Mpeg1	17476	1487.98	1.26156	0.142264	8.86774	7.46432e-19	9.98193e-16
ENSMUSG00000028581	Laptm5	16792	1712.83	0.798349	0.0936047	8.52894	1.47691e-17	1.84338e-14
ENSMUSG00000058715	Fcer1g	14127	312.17	1.0597	0.125655	8.43345	3.35622e-17	3.9272e-14
ENSMUSG00000016256	Ctsz	64138	1662.27	0.761009	0.0908622	8.37542	5.50276e-17	6.06015e-14
ENSMUSG00000028859	Csf3r	12986	424.479	0.866359	0.105139	8.24016	1.71979e-16	1.78878e-13
ENSMUSG00000031995	St14	19143	67.6183	1.35776	0.166777	8.14121	3.91344e-16	3.81881e-13
ENSMUSG00000038204	Asb10	117590	20.7984	2.01523	0.247687	8.13618	4.07949e-16	3.81881e-13
ENSMUSG00000006519	Cyba	13057	235.677	0.887055	0.111636	7.94594	1.92722e-15	1.71816e-12
ENSMUSG00000030124	Lag3	16768	284.137	0.931548	0.121105	7.69205	1.44795e-14	1.2322e-11
ENSMUSG00000029925	Tbxas1	21391	120.02	0.902649	0.117562	7.67807	1.61506e-14	1.31466e-11
ENSMUSG00000007891	Ctsd	13033	16551	0.673639	0.0878586	7.66732	1.75632e-14	1.37008e-11
ENSMUSG00000018008	Cyth4	72318	571.996	0.633617	0.0832757	7.60866	2.76958e-14	2.07408e-11
ENSMUSG00000025534	Gusb	110006	758.517	0.416505	0.0560693	7.42839	1.09926e-13	7.91552e-11
ENSMUSG00000020932	Gfap	14580	18197.9	1.33595	0.18287	7.30548	2.76273e-13	1.9157e-10
ENSMUSG00000000682	Cd52	23833	100.454	1.47438	0.20245	7.2827	3.27196e-13	2.18777e-10
ENSMUSG00000022831	Hcls1	15163	206.578	0.683385	0.0947194	7.21484	5.39988e-13	3.48609e-10
ENSMUSG00000040552	C3ar1	12267	154.812	1.04707	0.145469	7.19788	6.11545e-13	3.81645e-10
ENSMUSG00000036887	C1qa	12259	2089.33	0.895814	0.12458	7.19069	6.44649e-13	3.89326e-10
ENSMUSG00000000628	Hk2	15277	195.106	0.568082	0.0794346	7.15158	8.57864e-13	5.01904e-10
ENSMUSG00000020399	Havcr2	171285	149.394	0.758277	0.106235	7.13774	9.4879e-13	5.3828e-10
ENSMUSG00000040528	Milr1	380732	20.232	1.49011	0.210435	7.0811	1.43013e-12	7.87494e-10
ENSMUSG00000030798	Cd37	12493	232.639	0.764142	0.109768	6.9614	3.36897e-12	1.80211e-09
ENSMUSG00000059498	Fcgr3	14131	395.527	0.893368	0.128912	6.93004	4.20723e-12	2.188e-09
ENSMUSG00000052160	Pld4	104759	334.867	0.720354	0.10536	6.83706	8.08361e-12	4.0903e-09
ENSMUSG00000026480	Ncf2	17970	192.176	0.557609	0.0817745	6.81886	9.17666e-12	4.40527e-09
ENSMUSG00000044468	Tent5c	74645	226.501	0.878355	0.128757	6.82182	8.98968e-12	4.40527e-09
ENSMUSG00000021423	Ly86	17084	407.135	0.82484	0.122726	6.72097	1.80518e-11	8.44914e-09
ENSMUSG00000036896	C1qc	12262	1372.9	0.844659	0.126237	6.69105	2.21574e-11	1.01178e-08
ENSMUSG00000025232	Hexa	15211	2178.26	0.38722	0.0581815	6.65539	2.82559e-11	1.22202e-08
ENSMUSG00000038147	Cd84	12523	152.539	1.02449	0.153907	6.65658	2.80278e-11	1.22202e-08
ENSMUSG00000043157	Arl11	219144	27.9384	1.37878	0.207243	6.65299	2.87195e-11	1.22202e-08
ENSMUSG00000009734	Pou6f2	218030	133.269	-0.639839	0.0965721	-6.6255	3.46076e-11	1.43983e-08
ENSMUSG00000035697	Arhgap45	70719	403.238	0.676452	0.10224	6.6163	3.68297e-11	1.49897e-08
ENSMUSG00000021876	Rnase4	58809	500.909	0.731878	0.111126	6.586	4.51848e-11	1.7624e-08
ENSMUSG00000043008	Klhl6	239743	83.3069	0.806413	0.122389	6.58893	4.43016e-11	1.7624e-08
ENSMUSG00000005373	Mlxipl	58805	166.727	0.707655	0.107615	6.57581	4.83878e-11	1.84881e-08
ENSMUSG00000027858	Tspan2	70747	3877.13	-0.622964	0.095354	-6.53317	6.43932e-11	2.41114e-08
ENSMUSG00000020101	Vsir	74048	1284.26	0.423443	0.0650465	6.50985	7.52242e-11	2.76147e-08
ENSMUSG00000038642	Ctss	13040	2766.14	0.651471	0.100143	6.50541	7.74819e-11	2.78965e-08
ENSMUSG00000034708	Grn	14824	2203.19	0.4594	0.0708029	6.48843	8.67333e-11	3.06381e-08
ENSMUSG00000004707	Ly9	17085	46.0515	1.46368	0.227884	6.4229	1.33706e-10	4.57334e-08
ENSMUSG00000034116	Vav1	22324	174.256	0.559329	0.0870935	6.42216	1.34352e-10	4.57334e-08
ENSMUSG00000026285	Pdcd1	18566	23.2188	1.90325	0.297167	6.40466	1.50705e-10	5.03839e-08
ENSMUSG00000004266	Ptpn6	15170	160.707	0.687984	0.108205	6.35814	2.04218e-10	6.70765e-08
ENSMUSG00000059743	Fdps	110196	2222.96	0.474192	0.0746301	6.3539	2.09927e-10	6.77631e-08
ENSMUSG00000044811	Cd300c2	140497	148.432	0.80003	0.126429	6.32791	2.48498e-10	7.88538e-08
ENSMUSG00000022892	App	11820	71150.5	0.516059	0.0818738	6.3031	2.91756e-10	9.10375e-08
ENSMUSG00000060882	Kcnd2	16508	4587.26	-0.301636	0.0480623	-6.27593	3.47542e-10	1.06667e-07
ENSMUSG00000036905	C1qb	12260	1636.99	0.899526	0.144175	6.23913	4.40019e-10	1.32871e-07
ENSMUSG00000026177	Slc11a1	18173	152.104	0.871408	0.139869	6.23018	4.65904e-10	1.38455e-07
ENSMUSG00000042807	Hecw2	329152	2650.61	-0.501522	0.0805753	-6.22426	4.83819e-10	1.41532e-07
ENSMUSG00000060716	Plekhh1	211945	1473.6	-0.611233	0.0984718	-6.20719	5.39403e-10	1.55365e-07
ENSMUSG00000024597	Slc12a2	20496	3729.09	-0.449116	0.073211	-6.13455	8.54003e-10	2.42252e-07
ENSMUSG00000021273	Fdft1	14137	3581.47	0.425675	0.0694572	6.1286	8.86544e-10	2.47729e-07
ENSMUSG00000078945	Naip2	17948	67.9491	0.865248	0.142417	6.07546	1.23634e-09	3.40393e-07
ENSMUSG00000050505	Pcdh20	219257	1167.94	-0.534157	0.0881882	-6.05701	1.38675e-09	3.76272e-07
ENSMUSG00000045502	Hcar2	80885	20.5842	2.3545	0.39116	6.01928	1.75192e-09	4.61964e-07
ENSMUSG00000040751	Lat2	56743	136.123	0.680348	0.113492	5.9947	2.03863e-09	5.30101e-07
ENSMUSG00000036908	Unc93b1	54445	535.007	0.517559	0.0869356	5.95336	2.62689e-09	6.73706e-07
ENSMUSG00000040345	Arhgap9	216445	43.7214	0.92546	0.155639	5.9462	2.74444e-09	6.94343e-07
ENSMUSG00000024300	Myo1f	17916	201.217	0.740823	0.124735	5.93918	2.8645e-09	7.15056e-07
ENSMUSG00000079110	Capn3	12335	379.153	0.485842	0.0819292	5.93002	3.02899e-09	7.46168e-07
ENSMUSG00000063234	Gpr84	80910	48.8013	1.01087	0.170733	5.92074	3.2049e-09	7.69259e-07
ENSMUSG00000042190	Cmklr1	14747	133.644	0.755758	0.128403	5.88584	3.96048e-09	9.38584e-07
ENSMUSG00000024593	Megf10	70417	1279.31	-0.331667	0.0565395	-5.86611	4.4613e-09	1.04406e-06
ENSMUSG00000037712	Fermt2	218952	2898.24	-0.289619	0.049683	-5.82933	5.56496e-09	1.28626e-06
ENSMUSG00000069516	Lyz2	17105	896.851	1.21317	0.209021	5.80404	6.4735e-09	1.47801e-06
ENSMUSG00000073418	C4b	12268	4542.82	1.02037	0.176728	5.77365	7.75711e-09	1.74974e-06
ENSMUSG00000035189	Ano4	320091	1045.23	-0.322691	0.0562011	-5.74172	9.37171e-09	2.08878e-06
ENSMUSG00000021624	Cd180	17079	114.126	1.09193	0.191048	5.71548	1.09394e-08	2.38148e-06
ENSMUSG00000027375	Mal	17153	5977.16	-0.481051	0.0841596	-5.71593	1.09103e-08	2.38148e-06
ENSMUSG00000034903	Cobll1	319876	466.081	-0.436371	0.0767616	-5.68476	1.31e-08	2.81906e-06
ENSMUSG00000021709	Erbin	59079	4567	-0.452719	0.0803697	-5.63295	1.77153e-08	3.76893e-06
ENSMUSG00000031349	Nsdhl	18194	1019.34	0.391383	0.0698475	5.60339	2.102e-08	4.42177e-06
ENSMUSG00000022231	Sema5a	20356	2423.62	-0.491299	0.0877656	-5.59785	2.17026e-08	4.51463e-06
ENSMUSG00000018920	Cxcl16	66102	92.3155	0.704217	0.125878	5.59443	2.21349e-08	4.55395e-06
ENSMUSG00000023832	Acat2	110460	1398.32	0.336965	0.0604137	5.57763	2.43821e-08	4.90841e-06
ENSMUSG00000039904	Gpr37	14763	2399.51	-0.512623	0.091901	-5.57799	2.43308e-08	4.90841e-06
ENSMUSG00000037287	Tbcel	272589	2048.08	-0.195102	0.0350909	-5.55992	2.69892e-08	5.31885e-06
ENSMUSG00000035093	Secisbp2l	70354	6631.85	-0.333992	0.0601475	-5.55288	2.80998e-08	5.48004e-06
ENSMUSG00000018819	Lsp1	16985	268.523	0.574588	0.103599	5.54626	2.91842e-08	5.63286e-06
ENSMUSG00000021375	Kif13a	16553	1597.06	-0.268207	0.0484442	-5.53641	3.08728e-08	5.89797e-06
ENSMUSG00000015950	Ncf1	17969	261.765	0.489233	0.088627	5.52013	3.38741e-08	6.3419e-06
ENSMUSG00000032122	Slc37a2	56857	196.539	0.4949	0.0896364	5.52119	3.36708e-08	6.3419e-06
ENSMUSG00000022488	Nckap1l	105855	597.824	0.385626	0.0700026	5.50874	3.61415e-08	6.69942e-06
ENSMUSG00000038495	Otud7b	229603	3217.45	-0.265013	0.0481941	-5.49887	3.82229e-08	7.01578e-06
ENSMUSG00000024799	Tm7sf2	73166	794.243	0.285864	0.0521955	5.47681	4.33071e-08	7.87181e-06
ENSMUSG00000013707	Tnfaip8l2	69769	81.6195	0.734517	0.134789	5.4494	5.05401e-08	9.01154e-06
ENSMUSG00000028412	Slc44a1	100434	3292.29	-0.299941	0.0550376	-5.44975	5.04407e-08	9.01154e-06
ENSMUSG00000053158	Fes	14159	196.669	0.513356	0.0942846	5.44474	5.18797e-08	9.16313e-06
ENSMUSG00000030235	Slco1c1	58807	1432.77	-0.583443	0.107334	-5.43577	5.45616e-08	9.54675e-06
ENSMUSG00000049625	Tifab	212937	153.831	0.590266	0.108837	5.42339	5.84794e-08	1.01375e-05
ENSMUSG00000020231	Dip2a	64451	4359.15	-0.22678	0.0418515	-5.41869	6.00382e-08	1.03123e-05
ENSMUSG00000026656	Fcgr2b	14130	262.717	0.733695	0.135508	5.41443	6.14854e-08	1.04648e-05
ENSMUSG00000044667	Plppr4	229791	8799.36	-0.338368	0.0625188	-5.41226	6.22355e-08	1.04971e-05
ENSMUSG00000024663	Rab3il1	74760	412.883	0.374024	0.0692847	5.39837	6.72502e-08	1.12416e-05
ENSMUSG00000050730	Arhgap42	71544	728.377	-0.313257	0.0582766	-5.37535	7.64341e-08	1.26637e-05
ENSMUSG00000038608	Dock10	210293	2328.12	-0.467943	0.0871085	-5.37196	7.7886e-08	1.27911e-05
ENSMUSG00000056492	Adgrf5	224792	992.191	-0.757985	0.142304	-5.32653	1.00107e-07	1.62974e-05
ENSMUSG00000032411	Tfdp2	211586	1850.76	-0.256275	0.0481498	-5.32245	1.02376e-07	1.65232e-05
ENSMUSG00000034957	Cebpa	12606	413.079	0.471186	0.0887276	5.31047	1.0934e-07	1.74963e-05
ENSMUSG00000035901	Dennd5a	19347	12435.4	-0.156617	0.0295112	-5.30704	1.11423e-07	1.76784e-05
ENSMUSG00000033904	Ccp110	101565	3361.94	-0.340169	0.0642531	-5.2942	1.19541e-07	1.87744e-05
ENSMUSG00000038481	Cdk19	78334	3522.79	-0.306329	0.0578745	-5.29299	1.20336e-07	1.87744e-05
ENSMUSG00000056737	Capg	12332	112.353	1.08295	0.205073	5.2808	1.28621e-07	1.99011e-05
ENSMUSG00000018166	Erbb3	13867	641.397	-0.453562	0.0860056	-5.27363	1.33751e-07	2.05253e-05
ENSMUSG00000030849	Fgfr2	14183	1981.27	-0.362491	0.0689178	-5.25976	1.44246e-07	2.19558e-05
ENSMUSG00000022297	Fzd6	14368	301.769	-0.595803	0.113319	-5.25775	1.45827e-07	2.20175e-05
ENSMUSG00000048022	Tmem229a	319832	3098.33	-0.315554	0.060069	-5.2532	1.4948e-07	2.23886e-05
ENSMUSG00000024696	Lpxn	107321	58.5586	0.655915	0.125185	5.23958	1.60942e-07	2.39139e-05
ENSMUSG00000038811	Gngt2	14710	86.6116	0.834474	0.159336	5.23718	1.63044e-07	2.40356e-05
ENSMUSG00000025558	Dock9	105445	6280.55	-0.322584	0.0616889	-5.22921	1.70239e-07	2.49001e-05
ENSMUSG00000074794	Arrdc3	105171	2004.87	-0.420029	0.0804205	-5.2229	1.76139e-07	2.55633e-05
ENSMUSG00000029771	Irf5	27056	179.213	0.461868	0.0885171	5.21784	1.81022e-07	2.60699e-05
ENSMUSG00000037731	Themis2	230787	50.6255	0.696422	0.133779	5.20577	1.93192e-07	2.76102e-05
ENSMUSG00000037242	Clic4	29876	3262.35	-0.414691	0.0797211	-5.20178	1.97393e-07	2.79969e-05
ENSMUSG00000020120	Plek	56193	864.937	0.426527	0.08202	5.20028	1.98989e-07	2.80111e-05
ENSMUSG00000036019	Tmtc2	278279	599.489	-0.351419	0.0676995	-5.19087	2.09314e-07	2.92446e-05
ENSMUSG00000039782	Cpeb2	231207	3720.61	-0.34334	0.0662619	-5.18155	2.20045e-07	3.05161e-05
ENSMUSG00000034574	Daam1	208846	3375.99	-0.180176	0.034806	-5.17658	2.25991e-07	3.10738e-05
ENSMUSG00000058589	Anks1b	77531	11328.2	-0.232948	0.0450104	-5.17543	2.27386e-07	3.10738e-05
ENSMUSG00000003812	Dnase2a	13423	285.743	0.396176	0.0768789	5.15326	2.56003e-07	3.47311e-05
ENSMUSG00000032340	Neo1	18007	4874.79	-0.320423	0.0622395	-5.14824	2.62949e-07	3.54167e-05
ENSMUSG00000021696	Elovl7	74559	736.368	-0.468297	0.091089	-5.14109	2.73144e-07	3.62681e-05
ENSMUSG00000060961	Slc4a4	54403	8243.09	-0.302225	0.0587794	-5.14168	2.72287e-07	3.62681e-05
ENSMUSG00000046442	Ppm1e	320472	9803.87	-0.361991	0.0704812	-5.13599	2.80663e-07	3.70041e-05
ENSMUSG00000027684	Mecom	14013	84.7861	-0.68498	0.133498	-5.13102	2.8817e-07	3.77282e-05
ENSMUSG00000075254	Heg1	77446	1305.4	-0.426687	0.0833376	-5.11999	3.05555e-07	3.97264e-05
ENSMUSG00000022744	Cldnd1	224250	2490.56	-0.175617	0.0343598	-5.11113	3.20244e-07	4.1349e-05
ENSMUSG00000003746	Man1a	17155	1529.62	-0.373152	0.0731122	-5.10383	3.32848e-07	4.2682e-05
ENSMUSG00000019943	Atp2b1	67972	24223.3	-0.416036	0.0816013	-5.0984	3.42544e-07	4.34694e-05
ENSMUSG00000020183	Cpm	70574	490.471	-0.528693	0.10371	-5.0978	3.43632e-07	4.34694e-05
ENSMUSG00000026548	Slamf9	98365	53.0229	1.0848	0.212912	5.09505	3.48645e-07	4.36676e-05
ENSMUSG00000040351	Ankib1	70797	2429.78	-0.257305	0.0505076	-5.09439	3.49863e-07	4.36676e-05
ENSMUSG00000022514	Il1rap	16180	1620.51	-0.381734	0.0750677	-5.0852	3.67243e-07	4.55333e-05
ENSMUSG00000031662	Snx20	71607	49.5975	0.631632	0.124516	5.07272	3.92168e-07	4.83038e-05
ENSMUSG00000035954	Dock4	238130	4948.67	-0.378665	0.0746989	-5.06922	3.99457e-07	4.88799e-05
ENSMUSG00000028542	Slc6a9	14664	1264.18	-0.363039	0.0716599	-5.06614	4.05959e-07	4.9353e-05
ENSMUSG00000026830	Ermn	77767	2121.14	-0.585042	0.115602	-5.06081	4.17476e-07	5.0139e-05
ENSMUSG00000050663	Trhde	237553	1146.87	-0.427965	0.0845668	-5.06067	4.1778e-07	5.0139e-05
ENSMUSG00000020099	Unc5b	107449	1319.84	-0.433559	0.0857157	-5.0581	4.23448e-07	5.04955e-05
ENSMUSG00000029467	Atp2a2	11938	30646	-0.382542	0.0756836	-5.05449	4.31554e-07	5.11364e-05
ENSMUSG00000040747	Cd53	12508	319.555	0.497781	0.0985183	5.05268	4.35656e-07	5.12978e-05
ENSMUSG00000015947	Fcgr1	14129	147.376	0.474288	0.0939031	5.05082	4.39912e-07	5.14752e-05
ENSMUSG00000027995	Tlr2	24088	90.4048	0.812677	0.161329	5.03739	4.71916e-07	5.45383e-05
ENSMUSG00000029622	Arpc1b	11867	721.439	0.421159	0.0836009	5.03774	4.71073e-07	5.45383e-05
ENSMUSG00000032727	Mier3	218613	1165.19	-0.242679	0.0482065	-5.03415	4.79973e-07	5.51291e-05
ENSMUSG00000074746	Pdzd8	107368	3375.04	-0.266124	0.0529748	-5.0236	5.07108e-07	5.78907e-05
ENSMUSG00000033713	Foxn3	71375	639.918	-0.460159	0.0919029	-5.00701	5.52819e-07	6.2334e-05
ENSMUSG00000052609	Plekhg3	263406	758.289	-0.379777	0.0758377	-5.00776	5.50673e-07	6.2334e-05
ENSMUSG00000074622	Mafb	16658	636.288	0.393342	0.0785757	5.0059	5.56018e-07	6.2334e-05
ENSMUSG00000000708	Kat2b	18519	1121.54	-0.332828	0.0665488	-5.00126	5.69566e-07	6.34727e-05
ENSMUSG00000021703	Serinc5	218442	3424.91	-0.270949	0.0542101	-4.99811	5.78935e-07	6.41351e-05
ENSMUSG00000030577	Cd22	12483	20.9225	1.34956	0.270191	4.99484	5.8884e-07	6.48486e-05
ENSMUSG00000048779	P2ry6	233571	112.025	0.603321	0.121024	4.98513	6.19189e-07	6.77922e-05
ENSMUSG00000086290	Snhg12	100039864	597.378	0.367432	0.0737302	4.98347	6.24539e-07	6.79803e-05
ENSMUSG00000025584	Pde8a	18584	826.335	-0.417834	0.0841881	-4.9631	6.93759e-07	7.50784e-05
ENSMUSG00000005142	Man2b1	17159	1923.81	0.445252	0.089852	4.95539	7.2184e-07	7.76683e-05
ENSMUSG00000021242	Npc2	67963	2392.84	0.316288	0.063875	4.95167	7.35798e-07	7.87178e-05
ENSMUSG00000047810	Ccdc88b	78317	294.457	0.435702	0.0880595	4.94781	7.50517e-07	7.98363e-05
ENSMUSG00000029167	Ppargc1a	19017	2516.52	-0.294311	0.0595738	-4.94027	7.80135e-07	8.25109e-05
ENSMUSG00000034714	Ttyh2	117160	1603.69	-0.346069	0.0700658	-4.93919	7.84475e-07	8.25109e-05
ENSMUSG00000030994	D7Ertd443e	71007	150.168	-0.483502	0.0979645	-4.93548	7.99548e-07	8.33664e-05
ENSMUSG00000052336	Cx3cr1	13051	1837.38	0.37655	0.0763019	4.935	8.01515e-07	8.33664e-05
ENSMUSG00000027087	Itgav	16410	4115.09	-0.332116	0.067413	-4.92659	8.36773e-07	8.56069e-05
ENSMUSG00000036098	Myrf	225908	2548.79	-0.396831	0.0805271	-4.92792	8.31097e-07	8.56069e-05
ENSMUSG00000038173	Enpp6	320981	207.525	-0.78407	0.159118	-4.92761	8.32409e-07	8.56069e-05
ENSMUSG00000033740	St18	240690	445.016	-0.564728	0.114725	-4.92247	8.54588e-07	8.69543e-05
ENSMUSG00000020300	Cpeb4	67579	5552.9	-0.363158	0.0738617	-4.91673	8.79999e-07	8.90559e-05
ENSMUSG00000051212	Gpr183	321019	65.9917	0.591676	0.120475	4.9112	9.05193e-07	9.11131e-05
ENSMUSG00000020576	Nbas	71169	1936.53	-0.257089	0.0523773	-4.9084	9.18215e-07	9.19295e-05
ENSMUSG00000022139	Mbnl2	105559	8495.07	-0.260731	0.0532294	-4.89825	9.66947e-07	9.62935e-05
ENSMUSG00000044340	Phlpp1	98432	4151.2	-0.273018	0.0557667	-4.89571	9.79495e-07	9.7027e-05
ENSMUSG00000047250	Ptgs1	19224	702.925	0.252201	0.0515295	4.89431	9.86519e-07	9.72084e-05
ENSMUSG00000073680	Tmem88b	320587	3271.23	-0.439421	0.0900275	-4.88097	1.05566e-06	0.000103477
ENSMUSG00000026610	Esrrg	26381	1305.36	-0.419494	0.0862982	-4.86098	1.16804e-06	0.000113896
ENSMUSG00000071724	Smpd5	100503915	18.0743	0.950634	0.195876	4.85324	1.21463e-06	0.000117825
ENSMUSG00000010175	Prox1	19130	1232.03	-0.499347	0.102937	-4.851	1.22844e-06	0.000118064
ENSMUSG00000024621	Csf1r	12978	3015.86	0.388795	0.0801508	4.85079	1.2297e-06	0.000118064
ENSMUSG00000025161	Slc16a3	80879	189.823	0.428687	0.0884659	4.84579	1.26108e-06	0.000120459
ENSMUSG00000032064	Dixdc1	330938	4111.38	-0.21369	0.0441982	-4.83481	1.33276e-06	0.000126659
ENSMUSG00000030745	Il21r	60504	63.4087	0.608747	0.125988	4.8318	1.35306e-06	0.000127939
ENSMUSG00000052926	Rnaseh2a	69724	807.561	0.252747	0.0523432	4.82865	1.37462e-06	0.000128925
ENSMUSG00000097789	Gm2115	100039239	361.765	-0.543595	0.112586	-4.82827	1.37725e-06	0.000128925
ENSMUSG00000049493	Pls1	102502	634.121	-0.423863	0.087886	-4.82288	1.41502e-06	0.000131801
ENSMUSG00000035783	Acta2	11475	146.379	-0.795542	0.165111	-4.81821	1.44849e-06	0.000134251
ENSMUSG00000032841	Prr5l	72446	561.381	-0.448403	0.0930871	-4.81703	1.45714e-06	0.000134387
ENSMUSG00000030237	Slco1a4	28250	1582.8	-0.582011	0.12095	-4.812	1.49431e-06	0.000137139
ENSMUSG00000031903	Pla2g15	192654	1189.88	0.257716	0.0535887	4.80915	1.51572e-06	0.000138426
ENSMUSG00000021364	Elovl2	54326	621.479	-0.238429	0.0496559	-4.80164	1.57375e-06	0.000141653
ENSMUSG00000021745	Ptprg	19270	3597.03	-0.325836	0.0678359	-4.8033	1.5607e-06	0.000141653
ENSMUSG00000032854	Ugt8a	22239	2181.41	-0.651158	0.135594	-4.80225	1.56892e-06	0.000141653
ENSMUSG00000062078	Qk	19317	13406.4	-0.330973	0.069077	-4.79136	1.65654e-06	0.000148391
ENSMUSG00000079017	Ifi27l2a	76933	48.2821	1.15982	0.242168	4.78933	1.67339e-06	0.000149187
ENSMUSG00000025964	Adam23	23792	7681.65	-0.208101	0.0434851	-4.78558	1.7049e-06	0.000151276
ENSMUSG00000041939	Mvk	17855	794.857	0.379449	0.0793119	4.78426	1.71618e-06	0.000151558
ENSMUSG00000036790	Slitrk2	245450	1418.73	-0.299422	0.0626147	-4.78197	1.73586e-06	0.00015232
ENSMUSG00000071203	Naip5	17951	92.3671	0.712248	0.148963	4.78137	1.74107e-06	0.00015232
ENSMUSG00000037686	Aspg	104816	338.4	0.803933	0.1684	4.77394	1.80656e-06	0.000157313
ENSMUSG00000020333	Acsl6	216739	7995.55	-0.188313	0.0394607	-4.77216	1.82262e-06	0.000157977
ENSMUSG00000019873	Reep3	28193	1567.64	-0.300817	0.063135	-4.76467	1.89164e-06	0.000163204
ENSMUSG00000031918	Mtmr2	77116	1823.86	-0.29625	0.062217	-4.76156	1.921e-06	0.000164977
ENSMUSG00000034648	Lrrn1	16979	2390.28	-0.284928	0.0598645	-4.75955	1.94023e-06	0.000165867
ENSMUSG00000055415	Atp10b	319767	80.8886	-0.577901	0.121514	-4.75583	1.97635e-06	0.000168187
ENSMUSG00000019189	Rnf145	74315	3988.8	-0.18651	0.0392713	-4.74928	2.04145e-06	0.000172941
ENSMUSG00000043019	Edem3	66967	2426.36	-0.321646	0.067796	-4.74433	2.09201e-06	0.000176426
ENSMUSG00000049092	Gpr137c	70713	878.246	-0.304909	0.0643383	-4.73916	2.14608e-06	0.000180174
ENSMUSG00000022864	D16Ertd472e	67102	180.182	-0.461099	0.0973981	-4.73417	2.19955e-06	0.000183839
ENSMUSG00000046410	Kcnk6	52150	182.138	0.327864	0.0692961	4.73135	2.23029e-06	0.000185212
ENSMUSG00000051504	Siglech	233274	566.916	0.442292	0.0934908	4.73086	2.23576e-06	0.000185212
ENSMUSG00000022742	Cpox	12892	1783.66	-0.259919	0.05515	-4.71295	2.4416e-06	0.000201373
ENSMUSG00000026737	Pip4k2a	18718	4030.73	-0.177699	0.0377842	-4.70299	2.56376e-06	0.00021052
ENSMUSG00000028399	Ptprd	19266	9954.98	-0.315282	0.0672373	-4.68909	2.74419e-06	0.000224353
ENSMUSG00000022817	Itgb5	16419	2063.67	0.377724	0.0807649	4.67683	2.91337e-06	0.000237148
ENSMUSG00000032050	Rdx	19684	3533.01	-0.20839	0.0446165	-4.67069	3.00184e-06	0.000243292
ENSMUSG00000020023	Tmcc3	319880	1956.51	-0.334571	0.0717651	-4.66203	3.13111e-06	0.000251591
ENSMUSG00000041707	Tmem273	69069	31.3912	0.781199	0.167535	4.66291	3.11768e-06	0.000251591
ENSMUSG00000026786	Apbb1ip	54519	231.345	0.39837	0.0855877	4.65453	3.24726e-06	0.000259808
ENSMUSG00000024238	Zeb1	21417	3301.62	-0.176234	0.0379325	-4.64599	3.38446e-06	0.000269633
ENSMUSG00000022358	Fbxo32	67731	1236.71	-0.350211	0.0754548	-4.64134	3.46159e-06	0.00027461
ENSMUSG00000048163	Selplg	20345	839.912	0.420671	0.0906681	4.63968	3.4895e-06	0.000275656
ENSMUSG00000023852	Chd1	12648	1265.92	-0.292248	0.0630326	-4.63645	3.54446e-06	0.000278821
ENSMUSG00000063531	Sema3e	20349	1125.19	-0.518081	0.111859	-4.63155	3.6293e-06	0.000284301
ENSMUSG00000027665	Pik3ca	18706	3397.52	-0.201203	0.0434608	-4.62954	3.66479e-06	0.000285884
ENSMUSG00000030203	Dusp16	70686	711.097	-0.253204	0.0547145	-4.62772	3.69709e-06	0.000287207
ENSMUSG00000002111	Spi1	20375	128.768	0.470416	0.101764	4.6226	3.78964e-06	0.00029318
ENSMUSG00000094724	Rnaset2b	68195	1110.92	0.295272	0.063888	4.62171	3.80595e-06	0.00029323
ENSMUSG00000047996	Prrg1	546336	369.06	-0.534887	0.115764	-4.62051	3.82797e-06	0.000293718
ENSMUSG00000033392	Clasp2	76499	12334.7	-0.205692	0.0445779	-4.61421	3.94584e-06	0.000301342
ENSMUSG00000040624	Plekhg1	213783	1216.85	-0.691734	0.149937	-4.6135	3.95952e-06	0.000301342
ENSMUSG00000027952	Pmvk	68603	1416.21	0.269967	0.0585913	4.60763	4.07285e-06	0.000308712
ENSMUSG00000039219	Arid4b	94246	3013.35	-0.299181	0.06495	-4.60633	4.09839e-06	0.000309395
ENSMUSG00000031387	Renbp	19703	178.178	0.39679	0.0861835	4.60402	4.14415e-06	0.000311593
ENSMUSG00000027562	Car2	12349	6346.29	-0.403343	0.0876498	-4.60175	4.18951e-06	0.000313744
ENSMUSG00000024965	Fermt3	108101	191.251	0.399309	0.0868327	4.5986	4.25337e-06	0.000317257
ENSMUSG00000025533	Asl	109900	685.52	0.294231	0.0640103	4.59661	4.29411e-06	0.000319025
ENSMUSG00000037736	Limch1	77569	4773.92	-0.16488	0.0359095	-4.59155	4.39972e-06	0.00032558
ENSMUSG00000026288	Inpp5d	16331	598.1	0.296047	0.0645595	4.58565	4.52581e-06	0.000333592
ENSMUSG00000073988	Ttpa	50500	152.336	-0.461625	0.100769	-4.58104	4.62674e-06	0.000339693
ENSMUSG00000033342	Plppr5	75769	1768.91	-0.243004	0.0530592	-4.57986	4.65296e-06	0.000340284
ENSMUSG00000045087	S1pr5	94226	643.738	-0.391971	0.0856435	-4.57678	4.72198e-06	0.000343988
ENSMUSG00000062184	Hs6st2	50786	2070.79	-0.228425	0.0499764	-4.57066	4.86179e-06	0.0003528
ENSMUSG00000017760	Ctsa	19025	3408.77	0.244353	0.053533	4.56454	5.00591e-06	0.00036185
ENSMUSG00000037996	Slc24a2	76376	20596.5	-0.463146	0.101484	-4.56373	5.02515e-06	0.00036185
ENSMUSG00000008734	Gprc5b	64297	7065.82	-0.231231	0.050703	-4.5605	5.10315e-06	0.000366058
ENSMUSG00000037318	Traf3ip3	215243	45.4995	0.610062	0.133862	4.55739	5.17925e-06	0.000370099
ENSMUSG00000052544	St6galnac3	20447	95.0353	-0.571723	0.125542	-4.55404	5.26259e-06	0.000374624
ENSMUSG00000031605	Klhl2	77113	7041.02	-0.250274	0.0549894	-4.55131	5.33133e-06	0.00037808
ENSMUSG00000026743	Mllt10	17354	1437.88	-0.185697	0.0408244	-4.54869	5.39801e-06	0.000381364
ENSMUSG00000079547	H2-DMb1	14999	45.7456	1.13927	0.250631	4.54562	5.4774e-06	0.000385518
ENSMUSG00000041205	Map6d1	208158	1953.73	-0.245605	0.0540573	-4.54343	5.53466e-06	0.000388089
ENSMUSG00000030272	Camk1	52163	3032.83	0.213726	0.0471658	4.53136	5.86039e-06	0.000409396
ENSMUSG00000054409	Tmem74	239408	182.131	-0.609842	0.134649	-4.52912	5.92305e-06	0.000412236
ENSMUSG00000029484	Anxa3	11745	377.651	0.516671	0.114154	4.5261	6.00809e-06	0.000415232
ENSMUSG00000031618	Nr3c2	110784	2300.08	-0.257993	0.0570061	-4.5257	6.01956e-06	0.000415232
ENSMUSG00000041483	Zfp281	226442	1920.36	-0.271826	0.0600687	-4.52524	6.03265e-06	0.000415232
ENSMUSG00000056004	9330182L06Rik	231014	2432.3	-0.350203	0.0776906	-4.50766	6.5545e-06	0.0004495
ENSMUSG00000005774	Rfx5	53970	642.821	-0.240677	0.053565	-4.49317	7.01721e-06	0.000472576
ENSMUSG00000022952	Runx1	12394	67.6485	0.625068	0.139108	4.49339	7.00977e-06	0.000472576
ENSMUSG00000032238	Rora	19883	4723.51	-0.387196	0.0861497	-4.49446	6.97476e-06	0.000472576
ENSMUSG00000042759	Apobr	171504	47.5947	0.596915	0.132827	4.49391	6.99258e-06	0.000472576
ENSMUSG00000057880	Abat	268860	13195.2	-0.220609	0.0490768	-4.49517	6.95134e-06	0.000472576
ENSMUSG00000031381	Piga	18700	411.636	-0.411897	0.091705	-4.49155	7.07075e-06	0.000474475
ENSMUSG00000015355	Cd48	12506	42.5446	0.889243	0.19808	4.48932	7.14522e-06	0.00047776
ENSMUSG00000048058	Ldlrad3	241576	505.808	-0.27834	0.0620173	-4.48811	7.1859e-06	0.00047877
ENSMUSG00000047976	Kcna1	16485	9333.89	-0.272295	0.0607372	-4.48317	7.35418e-06	0.000488245
ENSMUSG00000025060	Slk	20874	4252.16	-0.224216	0.0500671	-4.4783	7.52382e-06	0.000497742
ENSMUSG00000024074	Crim1	50766	3190.96	-0.227202	0.0508057	-4.47197	7.75015e-06	0.000509595
ENSMUSG00000025875	Tspan17	74257	1597.42	0.341689	0.0764101	4.47177	7.75742e-06	0.000509595
ENSMUSG00000021669	Col4a3bp	68018	3994.88	-0.281231	0.0629167	-4.46989	7.82586e-06	0.000512293
ENSMUSG00000034520	Gjc1	14615	162.81	-0.437649	0.0979896	-4.46629	7.95893e-06	0.000519188
ENSMUSG00000020774	Aspa	11484	916.573	-0.488978	0.109507	-4.46529	7.99606e-06	0.0005198
ENSMUSG00000026074	Map4k4	26921	5348.55	-0.189865	0.0425923	-4.45774	8.28289e-06	0.000536582
ENSMUSG00000002222	Rmnd5a	68477	6598.94	-0.199989	0.0449112	-4.45299	8.46834e-06	0.000546704
ENSMUSG00000033880	Lgals3bp	19039	656.123	0.538471	0.121022	4.44937	8.61222e-06	0.000554007
ENSMUSG00000079657	Rab26	328778	1478.33	0.349646	0.0785957	4.44866	8.64065e-06	0.000554007
ENSMUSG00000054675	Tmem119	231633	842.363	0.378741	0.0852162	4.44447	8.81079e-06	0.000562989
ENSMUSG00000054321	Taf4b	72504	229.096	-0.301653	0.0679056	-4.44224	8.90268e-06	0.000566925
ENSMUSG00000006517	Mvd	192156	777.155	0.423085	0.0953392	4.43769	9.09308e-06	0.000577087
ENSMUSG00000041741	Pde3a	54611	223.859	-0.414091	0.0934705	-4.43018	9.4153e-06	0.000595518
ENSMUSG00000026979	Psd4	215632	66.6766	0.500884	0.113182	4.42549	9.62234e-06	0.000606564
ENSMUSG00000029919	Hpgds	54486	333.885	0.380581	0.0860477	4.42291	9.73804e-06	0.000611798
ENSMUSG00000018042	Cyb5r3	109754	2282.42	0.276148	0.0624541	4.42162	9.79659e-06	0.000613417
ENSMUSG00000099974	Bcl2a1d	12047	19.4756	1.42881	0.323207	4.42074	9.83648e-06	0.000613862
ENSMUSG00000018377	Vezf1	22344	1699.16	-0.185183	0.0419262	-4.41688	1.00138e-05	0.000620099
ENSMUSG00000029086	Prom1	19126	395.603	-0.47152	0.106732	-4.4178	9.97108e-06	0.000620099
ENSMUSG00000046138	9930021J03Rik	240613	2550.71	-0.267523	0.0605807	-4.41598	1.00555e-05	0.000620099
ENSMUSG00000049252	Lrp1b	94217	2403.82	-0.440702	0.0998036	-4.41569	1.00689e-05	0.000620099
ENSMUSG00000034109	Golim4	73124	1026.27	-0.277346	0.0628336	-4.41397	1.0149e-05	0.000620947
ENSMUSG00000050708	Ftl1	14325	2725.29	0.284636	0.0644774	4.41451	1.0124e-05	0.000620947
ENSMUSG00000032041	Tirap	117149	171.693	-0.369456	0.0837474	-4.41155	1.02632e-05	0.000624685
ENSMUSG00000097415	AU020206	100504230	76.974	0.704095	0.159613	4.41127	1.02768e-05	0.000624685
ENSMUSG00000064329	Scn1a	20265	8102.12	-0.388601	0.0881631	-4.40775	1.04451e-05	0.000632856
ENSMUSG00000026749	Nek6	59126	1065.59	0.255347	0.0579918	4.40315	1.0669e-05	0.000644337
ENSMUSG00000054889	Dsp	109620	248.306	-1.02982	0.233996	-4.401	1.07752e-05	0.000648659
ENSMUSG00000014496	Ankrd28	105522	2542.47	-0.324562	0.0737926	-4.3983	1.091e-05	0.000654668
ENSMUSG00000046324	Ermp1	226090	2845.06	-0.213488	0.0485954	-4.39317	1.11708e-05	0.000668178
ENSMUSG00000038582	Pptc7	320717	1973.97	-0.300664	0.0684804	-4.39051	1.13088e-05	0.000674275
ENSMUSG00000032846	Zswim6	67263	1281.05	-0.305739	0.0696538	-4.38941	1.1366e-05	0.000675536
ENSMUSG00000035164	Zc3h12c	244871	658.314	-0.446511	0.10176	-4.38789	1.14456e-05	0.000678116
ENSMUSG00000027086	Fastkd1	320720	652.87	-0.215	0.0490072	-4.38711	1.14869e-05	0.000678415
ENSMUSG00000018427	Ypel2	77864	2962.82	-0.198276	0.0452233	-4.38437	1.1632e-05	0.000683857
ENSMUSG00000056515	Rab31	106572	2915.81	-0.187764	0.0428295	-4.384	1.16521e-05	0.000683857
ENSMUSG00000007041	Clic1	114584	361.42	0.3988	0.0909857	4.3831	1.17003e-05	0.00068454
ENSMUSG00000067336	Bmpr2	12168	9074.49	-0.276258	0.0630406	-4.38223	1.17471e-05	0.000685138
ENSMUSG00000004880	Lbr	98386	514.695	-0.245928	0.0561393	-4.38067	1.18313e-05	0.000687904
ENSMUSG00000031165	Was	22376	57.9155	0.485838	0.110944	4.37913	1.19155e-05	0.000690657
ENSMUSG00000031714	Gab1	14388	1239.41	-0.279088	0.0637455	-4.37816	1.19684e-05	0.000691583
ENSMUSG00000028011	Tdo2	56720	47.6268	-0.692352	0.158303	-4.37358	1.22223e-05	0.000704081
ENSMUSG00000021589	Rhobtb3	73296	1251.9	-0.307388	0.0703133	-4.37169	1.23287e-05	0.00070803
ENSMUSG00000020375	Rufy1	216724	1654.12	0.16713	0.038269	4.36725	1.25823e-05	0.000716244
ENSMUSG00000020604	Arsg	74008	994.849	-0.419963	0.0961636	-4.36717	1.25865e-05	0.000716244
ENSMUSG00000044626	Liph	239759	35.8046	0.64659	0.148016	4.36839	1.25168e-05	0.000716244
ENSMUSG00000049583	Grm5	108071	8953.51	-0.29332	0.0672731	-4.36013	1.29984e-05	0.000735214
ENSMUSG00000061130	Ppm1b	19043	5080.66	-0.134657	0.0308817	-4.36041	1.29816e-05	0.000735214
ENSMUSG00000037697	Ddhd1	114874	2666	-0.243434	0.0558415	-4.35937	1.30435e-05	0.000735544
ENSMUSG00000062382	Ftl1-ps1	634386	4013.52	0.337688	0.07749	4.35783	1.31357e-05	0.000738518
ENSMUSG00000066571	4931406P16Rik	233103	880.189	-0.330219	0.0758001	-4.35645	1.32191e-05	0.000740985
ENSMUSG00000025529	Zfp711	245595	599.903	-0.310843	0.0713641	-4.35574	1.32617e-05	0.00074115
ENSMUSG00000036745	Ttll7	70892	12986.2	-0.285549	0.0656594	-4.34894	1.36797e-05	0.000762238
ENSMUSG00000034792	Gna15	14676	76.4539	0.446154	0.102613	4.34792	1.37433e-05	0.00076351
ENSMUSG00000018567	Gabarap	56486	4656.49	0.309241	0.0712044	4.343	1.40551e-05	0.00077852
ENSMUSG00000027200	Sema6d	214968	3437.19	-0.261949	0.0604233	-4.33523	1.45605e-05	0.000798035
ENSMUSG00000031558	Slit2	20563	1421.91	-0.384258	0.0886315	-4.33546	1.45455e-05	0.000798035
ENSMUSG00000032740	Ccdc88a	108686	3575.26	-0.319538	0.0736931	-4.33607	1.45055e-05	0.000798035
ENSMUSG00000052760	A630001G21Rik	319997	45.945	0.617773	0.142509	4.33497	1.45779e-05	0.000798035
ENSMUSG00000031540	Kat6a	244349	3056.48	-0.278137	0.0642389	-4.32974	1.49288e-05	0.000812493
ENSMUSG00000044583	Tlr7	170743	136.954	0.613846	0.141766	4.32998	1.4912e-05	0.000812493
ENSMUSG00000051306	Usp42	76800	1066.72	-0.174441	0.0403493	-4.32328	1.53728e-05	0.000834231
ENSMUSG00000022255	Mtdh	67154	3535.81	-0.296051	0.06862	-4.31436	1.60069e-05	0.000851979
ENSMUSG00000024413	Npc1	18145	2448.63	-0.25055	0.058076	-4.31418	1.60194e-05	0.000851979
ENSMUSG00000026490	Cdc42bpa	226751	13586.8	-0.200978	0.0465458	-4.31786	1.57553e-05	0.000851979
ENSMUSG00000032349	Elovl5	68801	3126.2	-0.238969	0.0553798	-4.3151	1.59528e-05	0.000851979
ENSMUSG00000033454	Zbtb1	268564	890.876	-0.228172	0.0528963	-4.31357	1.60639e-05	0.000851979
ENSMUSG00000042106	Inka1	68176	57.4606	0.484609	0.11227	4.31645	1.5856e-05	0.000851979
ENSMUSG00000046096	Mosmo	233812	2966.97	-0.229467	0.0531786	-4.31502	1.59591e-05	0.000851979
ENSMUSG00000055421	Pcdh9	211712	5096.02	-0.334943	0.0775972	-4.31643	1.58572e-05	0.000851979
ENSMUSG00000071226	Cecr2	330409	280.197	-0.375185	0.0870008	-4.31243	1.61467e-05	0.00085395
ENSMUSG00000000290	Itgb2	16414	235.015	0.582196	0.135067	4.31041	1.62956e-05	0.000859259
ENSMUSG00000022311	Csmd3	239420	1612.78	-0.351398	0.0815344	-4.30982	1.63389e-05	0.000859259
ENSMUSG00000036087	Slain2	75991	966.86	-0.178193	0.0413721	-4.30708	1.65422e-05	0.000866059
ENSMUSG00000076439	Mog	17441	2095.86	-0.384518	0.0892808	-4.30684	1.65607e-05	0.000866059
ENSMUSG00000035936	Aldh5a1	214579	4335.49	-0.178816	0.041559	-4.30271	1.68724e-05	0.000868055
ENSMUSG00000036845	Lin37	75660	675.745	0.23331	0.0542166	4.30329	1.68281e-05	0.000868055
ENSMUSG00000044827	Tlr1	21897	25.0672	1.03581	0.240599	4.30515	1.66876e-05	0.000868055
ENSMUSG00000050199	Lgr4	107515	1503.26	-0.269302	0.0625898	-4.30265	1.6877e-05	0.000868055
ENSMUSG00000057134	Ado	211488	2449.3	-0.183688	0.0426878	-4.30306	1.68457e-05	0.000868055
ENSMUSG00000098112	Bin2	668218	236.107	0.392382	0.0911913	4.30284	1.68621e-05	0.000868055
ENSMUSG00000025647	Shisa5	66940	1759.71	0.257079	0.0598716	4.29383	1.75616e-05	0.000900792
ENSMUSG00000060012	Kif13b	16554	1608.29	-0.351236	0.0818297	-4.29229	1.76844e-05	0.000904608
ENSMUSG00000021775	Nr1d2	353187	5995.52	-0.256814	0.0598635	-4.28999	1.7868e-05	0.000909074
ENSMUSG00000022574	Naprt	223646	271.787	0.389137	0.0907083	4.28998	1.78688e-05	0.000909074
ENSMUSG00000037999	Arap2	212285	3722.35	-0.37337	0.0870478	-4.28926	1.79272e-05	0.000909575
ENSMUSG00000020262	Adarb1	110532	11484.3	-0.207786	0.0484867	-4.28542	1.82393e-05	0.00092291
ENSMUSG00000036202	Rif1	51869	1618.52	-0.384696	0.0898491	-4.28158	1.85571e-05	0.000936459
ENSMUSG00000053226	Dand5	23863	287.888	0.342091	0.0799636	4.27808	1.88511e-05	0.00094475
ENSMUSG00000087018	2900072N19Rik	73033	102.669	-0.410976	0.0960553	-4.27853	1.88131e-05	0.00094475
ENSMUSG00000044447	Dock5	68813	699.501	-0.394572	0.0922633	-4.27659	1.89779e-05	0.00094748
ENSMUSG00000030793	Pycard	66824	80.3533	0.527361	0.123406	4.2734	1.92518e-05	0.000956054
ENSMUSG00000070880	Gad1	14415	17006.6	-0.236385	0.0553142	-4.2735	1.92427e-05	0.000956054
ENSMUSG00000024378	Stard4	170459	1850.47	0.330424	0.0773371	4.27252	1.93279e-05	0.000957295
ENSMUSG00000036510	Cdh8	12564	1630.87	-0.325374	0.0762534	-4.267	1.98118e-05	0.000978674
ENSMUSG00000051910	Sox6	20679	1010.07	-0.321349	0.0753933	-4.26229	2.0234e-05	0.000996895
ENSMUSG00000068220	Lgals1	16852	438.011	0.542528	0.12732	4.26113	2.03394e-05	0.000999458
ENSMUSG00000040520	Manea	242362	1600.47	-0.32156	0.0755101	-4.2585	2.058e-05	0.00100864
ENSMUSG00000021236	Entpd5	12499	1599.74	-0.177256	0.0416369	-4.25719	2.07011e-05	0.00101112
ENSMUSG00000022449	Adamts20	223838	704.003	-0.258708	0.0607753	-4.25679	2.07387e-05	0.00101112
ENSMUSG00000003974	Grm3	108069	1906.66	-0.355794	0.0835997	-4.25592	2.08189e-05	0.00101239
ENSMUSG00000057335	Cep170	545389	3915.27	-0.294159	0.0691652	-4.253	2.1093e-05	0.00102307
ENSMUSG00000034041	Lyl1	17095	88.2331	0.476475	0.112068	4.25167	2.12182e-05	0.00102648
ENSMUSG00000059921	Unc5c	22253	1725.38	-0.282786	0.0665269	-4.25069	2.13109e-05	0.00102831
ENSMUSG00000029263	Pigg	433931	849.952	-0.294245	0.0692614	-4.24833	2.15374e-05	0.00103391
ENSMUSG00000094483	Purb	19291	21450.6	-0.221438	0.0521206	-4.24857	2.15137e-05	0.00103391
ENSMUSG00000002699	Lcp2	16822	118.101	0.436385	0.102865	4.2423	2.21237e-05	0.00105394
ENSMUSG00000020608	Smc6	67241	1885.48	-0.225645	0.0531774	-4.24325	2.20302e-05	0.00105394
ENSMUSG00000036053	Fmnl2	71409	2406.47	-0.206374	0.048641	-4.24279	2.20756e-05	0.00105394
ENSMUSG00000049800	Sertad2	58172	1199.86	-0.200976	0.0473901	-4.24089	2.22637e-05	0.00105792
ENSMUSG00000027956	Tmem144	70652	429.348	-0.244676	0.0577117	-4.23963	2.23892e-05	0.00106119
ENSMUSG00000022533	Atp13a3	224088	3327.44	-0.307379	0.072524	-4.23831	2.25206e-05	0.00106336
ENSMUSG00000058325	Dock1	330662	1242.91	-0.277357	0.0654448	-4.23803	2.25486e-05	0.00106336
ENSMUSG00000024095	Hnrnpll	72692	2875.04	-0.238199	0.0562143	-4.23733	2.26192e-05	0.00106401
ENSMUSG00000021209	Ppp4r4	74521	1934.34	-0.197734	0.0466871	-4.23531	2.2824e-05	0.00106828
ENSMUSG00000026922	Agpat2	67512	58.8602	0.46637	0.110105	4.23567	2.27875e-05	0.00106828
ENSMUSG00000026872	Zeb2	24136	5752.5	-0.283977	0.0671134	-4.2313	2.3234e-05	0.00108206
ENSMUSG00000066113	Adamtsl1	77739	270.85	-0.405733	0.0958802	-4.23167	2.31962e-05	0.00108206
ENSMUSG00000025892	Gria4	14802	4919.77	-0.218635	0.0516857	-4.2301	2.33592e-05	0.00108519
ENSMUSG00000032570	Atp2c1	235574	6396.03	-0.239559	0.0566645	-4.22767	2.36128e-05	0.00109155
ENSMUSG00000045636	Mtus1	102103	1737.5	-0.282375	0.0667857	-4.22808	2.35698e-05	0.00109155
ENSMUSG00000004151	Etv1	14009	2592.19	-0.361171	0.0854482	-4.22678	2.37059e-05	0.00109316
ENSMUSG00000040596	Pogk	71592	3099.07	-0.179433	0.0424597	-4.22595	2.3793e-05	0.00109448
ENSMUSG00000027201	Myef2	17876	3043.04	-0.301359	0.0713486	-4.22376	2.40264e-05	0.00110251
ENSMUSG00000024338	Psmb8	16913	81.3965	0.633648	0.150063	4.22254	2.41567e-05	0.00110578
ENSMUSG00000039167	Adgrl4	170757	531.044	-0.550833	0.13049	-4.22125	2.42948e-05	0.00110668
ENSMUSG00000070866	Zfp804a	241514	773.198	-0.390048	0.0923974	-4.22142	2.42772e-05	0.00110668
ENSMUSG00000031320	Rps4x	20102	8072.53	0.275904	0.065373	4.22046	2.43801e-05	0.00110788
ENSMUSG00000021938	Pspc1	66645	1797.84	-0.181055	0.0429265	-4.21778	2.46717e-05	0.00111571
ENSMUSG00000060216	Arrb2	216869	1669.07	0.245023	0.0580912	4.21789	2.46594e-05	0.00111571
ENSMUSG00000027957	Slc35a3	229782	942.604	-0.252806	0.0599781	-4.21498	2.498e-05	0.00112693
ENSMUSG00000050493	Fam167b	230766	24.869	0.896598	0.212799	4.21336	2.51601e-05	0.00113233
ENSMUSG00000046718	Bst2	69550	135.142	0.566913	0.134594	4.21201	2.53112e-05	0.00113639
ENSMUSG00000057182	Scn3a	20269	2439.53	-0.268662	0.0638398	-4.20837	2.57219e-05	0.00115207
ENSMUSG00000034610	Tut4	230594	1555.35	-0.304143	0.0722977	-4.20681	2.59001e-05	0.00115728
ENSMUSG00000040451	Sgms1	208449	1267.82	-0.273521	0.0650538	-4.20453	2.61627e-05	0.00116624
ENSMUSG00000028848	Gpn2	100210	273.624	0.328749	0.0782111	4.20335	2.62991e-05	0.00116721
ENSMUSG00000074305	Peak1	244895	2445.18	-0.276964	0.0658926	-4.20326	2.63093e-05	0.00116721
ENSMUSG00000031673	Cdh11	12552	2149.28	-0.28236	0.0672089	-4.20122	2.65478e-05	0.00117224
ENSMUSG00000032719	Sbspon	226866	19.6693	-0.676251	0.160952	-4.20157	2.65069e-05	0.00117224
ENSMUSG00000020696	Rffl	67338	701.405	-0.283349	0.0675242	-4.19626	2.71363e-05	0.0011926
ENSMUSG00000054162	Spock3	72902	5600.11	-0.423782	0.100981	-4.19666	2.70881e-05	0.0011926
ENSMUSG00000036777	Anln	68743	1725.8	-0.592961	0.141347	-4.19506	2.728e-05	0.00119546
ENSMUSG00000051506	Wdfy4	545030	176.246	0.348803	0.0831543	4.19465	2.73292e-05	0.00119546
ENSMUSG00000068748	Ptprz1	19283	7107.14	-0.384351	0.091642	-4.19405	2.74021e-05	0.00119586
ENSMUSG00000028944	Prkag2	108099	3018.8	0.142619	0.0340206	4.19214	2.76331e-05	0.00120034
ENSMUSG00000045767	B230219D22Rik	78521	4851.49	-0.224313	0.0535059	-4.1923	2.76142e-05	0.00120034
ENSMUSG00000021384	Susd3	66329	48.152	0.655177	0.156331	4.19096	2.77771e-05	0.0012038
ENSMUSG00000020964	Sel1l	20338	6974.28	-0.252207	0.0602139	-4.18852	2.80778e-05	0.00120816
ENSMUSG00000041762	Gpr155	68526	2454.37	-0.246566	0.0588715	-4.18821	2.81168e-05	0.00120816
ENSMUSG00000074892	B3galt5	93961	2295.95	-0.30297	0.0723415	-4.18805	2.81357e-05	0.00120816
ENSMUSG00000086968	4933431E20Rik	329735	2645.81	-0.13137	0.0313599	-4.18911	2.80045e-05	0.00120816
ENSMUSG00000027893	Ahcyl1	229709	15997.8	-0.122667	0.0293011	-4.18642	2.83391e-05	0.00121411
ENSMUSG00000000402	Egfl6	54156	68.7359	-0.575057	0.137433	-4.18428	2.8607e-05	0.00122279
ENSMUSG00000070034	Sp110	109032	56.9664	0.645474	0.154445	4.17931	2.92398e-05	0.00124699
ENSMUSG00000034744	Nagk	56174	1286.47	0.24487	0.0586005	4.17863	2.93264e-05	0.00124784
ENSMUSG00000021549	Rasa1	218397	2439.74	-0.242358	0.058018	-4.17729	2.95005e-05	0.0012524
ENSMUSG00000048965	Mrgpre	244238	645.728	0.292119	0.0699525	4.17597	2.96725e-05	0.00125685
ENSMUSG00000031342	Gpm6b	14758	33301.1	-0.250821	0.0600954	-4.17372	2.99667e-05	0.0012636
ENSMUSG00000040430	Pitpnc1	71795	3067.04	-0.279148	0.0668814	-4.17378	2.99587e-05	0.0012636
ENSMUSG00000066324	Impad1	242291	6467.53	-0.289025	0.0692638	-4.17282	3.00854e-05	0.00126575
ENSMUSG00000020646	Mboat2	67216	1074.13	-0.24817	0.0594906	-4.17159	3.02482e-05	0.00126975
ENSMUSG00000027199	Gatm	67092	4487.83	-0.261224	0.0626452	-4.16989	3.04742e-05	0.00127352
ENSMUSG00000068735	Trp53i11	277414	3290.76	0.314738	0.0754731	4.17021	3.0432e-05	0.00127352
ENSMUSG00000026510	Trp53bp2	209456	1216.65	-0.241784	0.0580004	-4.16866	3.06399e-05	0.0012776
ENSMUSG00000034724	Cnot6l	231464	2540.66	-0.23926	0.0574277	-4.16628	3.09613e-05	0.00128698
ENSMUSG00000053930	Shisa6	380702	1402.36	-0.401114	0.0962832	-4.16598	3.10023e-05	0.00128698
ENSMUSG00000005871	Apc	11789	13567.7	-0.285233	0.0684793	-4.16525	3.11016e-05	0.00128787
ENSMUSG00000038127	Ccdc50	67501	3244.51	-0.215897	0.0518518	-4.16372	3.13103e-05	0.00128953
ENSMUSG00000053475	Tnfaip6	21930	343.159	-0.454718	0.109215	-4.16351	3.13395e-05	0.00128953
ENSMUSG00000020594	Pum2	80913	8800.75	-0.208551	0.0501695	-4.15693	3.2255e-05	0.00131641
ENSMUSG00000020634	Ubxn2a	217379	1996.21	-0.344378	0.0828469	-4.1568	3.2274e-05	0.00131641
ENSMUSG00000035441	Myo1d	338367	734.189	-0.36366	0.0874696	-4.15756	3.21662e-05	0.00131641
ENSMUSG00000096592	Gm15801	627166	1041.69	-0.286198	0.0688505	-4.1568	3.22739e-05	0.00131641
ENSMUSG00000028456	Unc13b	22249	3177.11	0.232268	0.0559016	4.15494	3.25372e-05	0.00132426
ENSMUSG00000021065	Fut8	53618	2075.82	-0.168546	0.0405714	-4.1543	3.26289e-05	0.00132511
ENSMUSG00000027177	Hipk3	15259	4973.57	-0.220999	0.0532302	-4.15177	3.29913e-05	0.00133693
ENSMUSG00000046994	Mars2	212679	1272.41	-0.249716	0.0601666	-4.15041	3.31874e-05	0.00134197
ENSMUSG00000021870	Slmap	83997	5227.4	-0.216788	0.0522614	-4.14815	3.3517e-05	0.00135238
ENSMUSG00000024924	Vldlr	22359	3862.29	-0.176774	0.0426241	-4.14728	3.36454e-05	0.00135464
ENSMUSG00000024308	Tapbp	21356	1097.72	0.233976	0.0564244	4.14672	3.37272e-05	0.00135502
ENSMUSG00000033319	Fem1c	240263	1598.17	-0.224256	0.0540984	-4.14533	3.39317e-05	0.00135741
ENSMUSG00000038349	Plcl1	227120	1716.97	-0.229835	0.0554814	-4.14256	3.43443e-05	0.00137099
ENSMUSG00000024811	Tnks2	74493	6654.76	-0.203156	0.0491053	-4.13715	3.51643e-05	0.00140074
ENSMUSG00000029461	Fam168a	319604	12673.9	-0.175873	0.0425581	-4.13253	3.58793e-05	0.00142618
ENSMUSG00000002006	Pdzd4	245469	5148.95	0.178834	0.0432822	4.13181	3.59911e-05	0.0014276
ENSMUSG00000074093	Svip	75744	2564.69	-0.207683	0.0502721	-4.13118	3.6091e-05	0.00142853
ENSMUSG00000086844	B230206H07Rik	320871	109.501	-0.664241	0.160814	-4.13049	3.61993e-05	0.0014298
ENSMUSG00000021466	Ptch1	19206	3166.65	-0.257656	0.0624508	-4.12574	3.69546e-05	0.00145655
ENSMUSG00000047037	Nipa1	233280	1996.88	-0.281341	0.0682937	-4.11957	3.79574e-05	0.00149294
ENSMUSG00000028480	Glipr2	384009	149.144	0.448319	0.108893	4.11704	3.8377e-05	0.00150574
ENSMUSG00000062309	Rpp25	102614	440.397	0.378622	0.0919735	4.11664	3.84437e-05	0.00150574
ENSMUSG00000022351	Sqle	20775	2842.86	0.306913	0.0745946	4.11441	3.88171e-05	0.00151719
ENSMUSG00000025982	Sf3b1	81898	12118.1	-0.205814	0.0501454	-4.10434	4.05464e-05	0.00158148
ENSMUSG00000034235	Usp54	78787	2775.36	-0.300162	0.0731497	-4.10338	4.07149e-05	0.00158475
ENSMUSG00000027397	Slc20a1	20515	5507.19	0.12005	0.029261	4.10274	4.08293e-05	0.00158591
ENSMUSG00000021500	Ddx46	212880	3717.07	-0.198035	0.0482909	-4.10087	4.11601e-05	0.00159274
ENSMUSG00000027447	Cst3	13010	35730.3	0.35425	0.0863859	4.10078	4.11754e-05	0.00159274
ENSMUSG00000002395	Use1	67023	2032.18	0.368721	0.0899709	4.09823	4.16323e-05	0.00159624
ENSMUSG00000023959	Clic5	224796	262.781	-0.509494	0.124317	-4.09834	4.16129e-05	0.00159624
ENSMUSG00000025323	Sp4	20688	1140.56	-0.338041	0.0824915	-4.0979	4.16923e-05	0.00159624
ENSMUSG00000036634	Mag	17136	6390.16	-0.3658	0.0892272	-4.09964	4.13786e-05	0.00159624
ENSMUSG00000091712	Sec14l5	665119	531.808	-0.517992	0.126378	-4.09874	4.15408e-05	0.00159624
ENSMUSG00000004364	Cul3	26554	5671.68	-0.222269	0.0542705	-4.09558	4.21113e-05	0.00159848
ENSMUSG00000021830	Txndc16	70561	3747.85	-0.170463	0.0416087	-4.09681	4.18881e-05	0.00159848
ENSMUSG00000028397	Kdm4c	76804	1133.8	-0.24602	0.0600686	-4.09565	4.20991e-05	0.00159848
ENSMUSG00000039239	Tgfb2	21808	586.712	-0.308902	0.0754264	-4.09541	4.21423e-05	0.00159848
ENSMUSG00000041669	Prima1	170952	153.697	-0.455561	0.111255	-4.09475	4.22629e-05	0.00159848
ENSMUSG00000064215	Ifi27	52668	1119.35	0.316334	0.077249	4.09499	4.22182e-05	0.00159848
ENSMUSG00000026384	Ptpn4	19258	6021.84	-0.402119	0.0982415	-4.09317	4.25519e-05	0.00160011
ENSMUSG00000034377	Tulp4	68842	10858.4	-0.22107	0.0539993	-4.09394	4.24102e-05	0.00160011
ENSMUSG00000068335	Dok1	13448	64.3207	0.440418	0.1076	4.09311	4.25624e-05	0.00160011
ENSMUSG00000025764	Jade1	269424	2384.41	-0.136067	0.033252	-4.09199	4.27686e-05	0.00160463
ENSMUSG00000035681	Kcnc2	268345	4781.35	-0.253375	0.0619969	-4.0869	4.37179e-05	0.00163697
ENSMUSG00000032228	Tcf12	21406	1992.84	-0.189048	0.0463028	-4.08286	4.44845e-05	0.00166235
ENSMUSG00000004319	Clcn3	12725	8654.53	-0.232539	0.0570209	-4.07814	4.5398e-05	0.00168974
ENSMUSG00000020590	Snx13	217463	3782.45	-0.272233	0.0667795	-4.0766	4.56987e-05	0.00169756
ENSMUSG00000058897	Col25a1	77018	2844.62	-0.315269	0.0773508	-4.07583	4.58503e-05	0.00169982
ENSMUSG00000061080	Lsamp	268890	12879.4	-0.284122	0.0697386	-4.0741	4.61925e-05	0.00170912
ENSMUSG00000020859	Spag9	70834	17299.9	-0.247324	0.0607572	-4.0707	4.68726e-05	0.00173087
ENSMUSG00000003037	Rab8a	17274	1418.36	0.181415	0.0445941	4.06815	4.73888e-05	0.0017406
ENSMUSG00000043298	Smco3	654818	220.735	-0.374478	0.0920543	-4.06802	4.74151e-05	0.0017406
ENSMUSG00000097441	Gm26633	102633600	30.3876	-0.606651	0.149106	-4.06858	4.73009e-05	0.0017406
ENSMUSG00000018347	Zkscan6	52712	563.056	0.185045	0.0454982	4.06709	4.7604e-05	0.00174411
ENSMUSG00000032373	Car12	76459	864.096	-0.541522	0.133351	-4.06087	4.88908e-05	0.00178776
ENSMUSG00000050783	Htr1f	15557	86.0188	-0.708056	0.174414	-4.05963	4.91513e-05	0.00179378
ENSMUSG00000032293	Ireb2	64602	3261.62	-0.232251	0.0572424	-4.05733	4.9637e-05	0.00180799
ENSMUSG00000022876	Samsn1	67742	71.6213	0.528828	0.130424	4.05467	5.02041e-05	0.00181823
ENSMUSG00000024498	Tcerg1	56070	2874.28	-0.162676	0.0401208	-4.05465	5.02095e-05	0.00181823
ENSMUSG00000062561	Gm10118	791346	164.582	-0.281469	0.0694088	-4.05523	5.00843e-05	0.00181823
ENSMUSG00000027848	Olfml3	99543	573.333	0.708697	0.174856	4.05303	5.05589e-05	0.00182734
ENSMUSG00000026028	Trak2	70827	9052.26	-0.207416	0.0512023	-4.05091	5.10186e-05	0.0018404
ENSMUSG00000014355	Anapc1	17222	3956.24	-0.159019	0.0392823	-4.04812	5.16313e-05	0.00185893
ENSMUSG00000034801	Sos2	20663	1799.59	-0.207568	0.051291	-4.04687	5.19062e-05	0.00186524
ENSMUSG00000049791	Fzd4	14366	216.563	-0.465598	0.115111	-4.04477	5.2374e-05	0.00187844
ENSMUSG00000081892	Gm8864	667891	27.6479	0.674655	0.166838	4.04377	5.25995e-05	0.00188132
ENSMUSG00000090083	Rnf8	58230	242.401	0.334991	0.0828463	4.04352	5.26552e-05	0.00188132
ENSMUSG00000037278	Tmem97	69071	526.661	0.295064	0.0729925	4.04238	5.29108e-05	0.00188326
ENSMUSG00000069895	Atxn1l	52335	2168.34	-0.197155	0.0487699	-4.04256	5.28702e-05	0.00188326
ENSMUSG00000047843	Bri3	55950	720.388	0.328244	0.0812162	4.04161	5.30863e-05	0.00188592
ENSMUSG00000020376	Rnf130	59044	1549.38	-0.187455	0.0463969	-4.04025	5.33946e-05	0.00189328
ENSMUSG00000028289	Epha7	13841	2677.4	-0.244821	0.0606267	-4.03817	5.38688e-05	0.00190649
ENSMUSG00000033054	Npat	244879	1233.2	-0.268486	0.066522	-4.03605	5.43598e-05	0.00191662
ENSMUSG00000034998	Foxn2	14236	887.009	-0.261616	0.0648128	-4.03648	5.4259e-05	0.00191662
ENSMUSG00000044033	Ccdc141	545428	897.478	-0.345257	0.0855609	-4.03522	5.45509e-05	0.00191974
ENSMUSG00000015087	Rabl6	227624	7363.96	0.181007	0.0448713	4.03393	5.48526e-05	0.00192306
ENSMUSG00000025321	Itgb8	320910	3310.23	-0.310704	0.0770259	-4.03376	5.48911e-05	0.00192306
ENSMUSG00000054920	Klhl5	71778	1818.32	-0.192705	0.0477762	-4.03349	5.49534e-05	0.00192306
ENSMUSG00000020671	Rab10	19325	5391.34	-0.155278	0.0385019	-4.033	5.50702e-05	0.00192355
ENSMUSG00000026788	Zbtb43	71834	1273.53	-0.146715	0.0363826	-4.03255	5.51749e-05	0.00192362
ENSMUSG00000041180	Hectd2	226098	534.89	-0.443241	0.109952	-4.03121	5.54899e-05	0.00193101
ENSMUSG00000041415	Dicer1	192119	2915.89	-0.178215	0.0442227	-4.02995	5.57895e-05	0.00193783
ENSMUSG00000040188	Scamp2	24044	871.26	0.181115	0.0449525	4.02903	5.60076e-05	0.00194067
ENSMUSG00000047454	Gphn	268566	2772.4	-0.17435	0.0432767	-4.02873	5.60786e-05	0.00194067
ENSMUSG00000029648	Flt1	14254	1733.26	-0.568286	0.141177	-4.02536	5.68888e-05	0.00196508
ENSMUSG00000041058	Wwp1	107568	2323.55	-0.262507	0.0652482	-4.0232	5.74115e-05	0.00197948
ENSMUSG00000019841	Rev3l	19714	2219.56	-0.285795	0.0710599	-4.0219	5.77315e-05	0.00198686
ENSMUSG00000087088	Gm16638	102631889	76.1883	-0.505731	0.125773	-4.02099	5.79538e-05	0.00199085
ENSMUSG00000003423	Pih1d1	68845	819.936	0.333051	0.0828845	4.01826	5.86305e-05	0.0020104
ENSMUSG00000024369	Nelfe	27632	835.223	0.248031	0.0617658	4.01566	5.92785e-05	0.00202521
ENSMUSG00000047213	Ythdf3	229096	3785.82	-0.209391	0.0521409	-4.01587	5.92258e-05	0.00202521
ENSMUSG00000049076	Acap2	78618	4843.21	-0.247612	0.061686	-4.01406	5.9682e-05	0.00203527
ENSMUSG00000023094	Msrb2	76467	756.931	0.209922	0.0523832	4.00742	6.13847e-05	0.00208574
ENSMUSG00000030801	Kat8	67773	638.128	0.182893	0.0456358	4.00766	6.13228e-05	0.00208574
ENSMUSG00000016262	Sertad4	214791	713.852	-0.177998	0.0444278	-4.00646	6.16346e-05	0.00208666
ENSMUSG00000037434	Slc30a1	22782	1830.23	-0.238419	0.0595046	-4.00672	6.15665e-05	0.00208666
ENSMUSG00000049112	Oxtr	18430	381.908	0.31382	0.0783675	4.00447	6.21565e-05	0.00209998
ENSMUSG00000091649	Phf11b	236451	20.1231	0.896849	0.223982	4.00411	6.22524e-05	0.00209998
ENSMUSG00000032606	Nicn1	66257	3497.02	0.143325	0.0358279	4.00038	6.324e-05	0.00212612
ENSMUSG00000041617	Ccdc74a	72315	942.053	0.272533	0.0681296	4.00021	6.32861e-05	0.00212612
ENSMUSG00000053164	Gpr21	338346	137.444	-0.508114	0.127032	-3.9999	6.33679e-05	0.00212612
ENSMUSG00000053062	Jam2	67374	1665.47	-0.261891	0.0654828	-3.99938	6.35081e-05	0.00212701
ENSMUSG00000026126	Ptpn18	19253	35.7544	0.583461	0.145995	3.99645	6.42992e-05	0.00214966
ENSMUSG00000037270	4932438A13Rik	229227	6220.14	-0.31505	0.078884	-3.99385	6.50102e-05	0.0021657
ENSMUSG00000046572	Zfp518b	100515	677.548	-0.246615	0.0617485	-3.99386	6.50059e-05	0.0021657
ENSMUSG00000015120	Ube2i	22196	3794.18	-0.123368	0.0309084	-3.99141	6.56828e-05	0.00217425
ENSMUSG00000024073	Birc6	12211	6407.29	-0.254672	0.063808	-3.99123	6.57315e-05	0.00217425
ENSMUSG00000040710	St8sia4	20452	773.906	-0.33124	0.0829862	-3.9915	6.56562e-05	0.00217425
ENSMUSG00000055447	Cd47	16423	3889.7	-0.334715	0.0838625	-3.99124	6.57292e-05	0.00217425
ENSMUSG00000037625	Cldn11	18417	4648.96	-0.318285	0.0797637	-3.99035	6.59769e-05	0.00217852
ENSMUSG00000033577	Myo6	17920	5347.81	-0.183197	0.0459692	-3.98522	6.74174e-05	0.00222
ENSMUSG00000041596	Nlrp5-ps	100417675	34.5866	1.79493	0.450416	3.98503	6.74704e-05	0.00222
ENSMUSG00000063663	Brwd3	382236	853.751	-0.364919	0.0916864	-3.98008	6.88918e-05	0.00226034
ENSMUSG00000069678	Pcgf1	69837	436.09	0.181617	0.0456333	3.97992	6.89377e-05	0.00226034
ENSMUSG00000003863	Ppfia3	76787	9339.26	0.241078	0.0605959	3.97846	6.93638e-05	0.00227033
ENSMUSG00000000197	Nalcn	338370	5073.66	-0.250389	0.0630065	-3.97402	7.06694e-05	0.00230628
ENSMUSG00000040123	Zmym5	219105	1938.55	-0.166941	0.0420094	-3.97389	7.07084e-05	0.00230628
ENSMUSG00000037253	Mex3c	240396	1487.36	-0.235518	0.0592753	-3.9733	7.08848e-05	0.00230801
ENSMUSG00000029211	Gabra4	14397	5075.11	-0.260272	0.0655362	-3.97142	7.14459e-05	0.00231821
ENSMUSG00000056050	Mia3	338366	3581.16	-0.163132	0.0410729	-3.97177	7.13407e-05	0.00231821
ENSMUSG00000026829	Gbgt1	227671	43.3054	0.518121	0.130593	3.96745	7.26443e-05	0.00234735
ENSMUSG00000027272	Ubr1	22222	2731.53	-0.248966	0.0627433	-3.968	7.24769e-05	0.00234735
ENSMUSG00000042105	Inpp5f	101490	5720.56	-0.170377	0.0429507	-3.9668	7.28452e-05	0.00234735
ENSMUSG00000055553	Kxd1	75620	986.156	0.208898	0.0526579	3.96708	7.27584e-05	0.00234735
ENSMUSG00000026987	Baz2b	407823	1787.19	-0.234941	0.0592693	-3.96396	7.37179e-05	0.00236516
ENSMUSG00000028780	Sema3c	20348	999.707	-0.390297	0.0984546	-3.96423	7.3632e-05	0.00236516
ENSMUSG00000030844	Rgs10	67865	1056.85	0.284689	0.0718228	3.96376	7.37769e-05	0.00236516
ENSMUSG00000036391	Sec24a	77371	1370.1	-0.226717	0.0572075	-3.96306	7.39961e-05	0.00236813
ENSMUSG00000026662	Sephs1	109079	1038.84	-0.154343	0.0389509	-3.96252	7.41642e-05	0.00236946
ENSMUSG00000018654	Ikzf1	22778	183.328	0.30003	0.0757542	3.96058	7.4769e-05	0.00237047
ENSMUSG00000020794	Ube2g1	67128	2438.35	-0.17733	0.0447878	-3.95935	7.51555e-05	0.00237047
ENSMUSG00000027312	Atrn	11990	9289.31	-0.265534	0.0670747	-3.95877	7.53355e-05	0.00237047
ENSMUSG00000028463	Car9	230099	26.1189	-0.702526	0.177417	-3.95973	7.50332e-05	0.00237047
ENSMUSG00000030306	Tmtc1	387314	4061.17	-0.225489	0.0569555	-3.95904	7.52517e-05	0.00237047
ENSMUSG00000031827	Cotl1	72042	2383.55	0.316254	0.0798755	3.95934	7.51579e-05	0.00237047
ENSMUSG00000040455	Usp45	77593	2536.31	-0.251997	0.0636497	-3.95913	7.52245e-05	0.00237047
ENSMUSG00000068744	Psrc1	56742	322.585	0.334802	0.0845114	3.96162	7.44422e-05	0.00237047
ENSMUSG00000091549	Gm6548	625054	177.254	0.275413	0.0695596	3.95938	7.5146e-05	0.00237047
ENSMUSG00000031467	Agpat5	52123	2577.82	-0.122901	0.0310639	-3.95641	7.60859e-05	0.00239007
ENSMUSG00000032479	Map4	17758	15426.3	-0.114689	0.0289925	-3.95582	7.62728e-05	0.00239193
ENSMUSG00000047022	Mipol1	73490	182.763	-0.353505	0.0894295	-3.95289	7.72136e-05	0.00241738
ENSMUSG00000050963	Kcns2	16539	1058.73	-0.32233	0.0815792	-3.95113	7.77825e-05	0.00243112
ENSMUSG00000032776	Mctp2	244049	108.488	-0.528144	0.133693	-3.95042	7.80137e-05	0.00243429
ENSMUSG00000040268	Plekha1	101476	4295.97	-0.19442	0.0492528	-3.94738	7.901e-05	0.00246127
ENSMUSG00000039168	Dap	223453	228.716	0.252	0.0638715	3.94542	7.96606e-05	0.00247742
ENSMUSG00000032609	Klhdc8b	78267	1259.67	0.281616	0.071403	3.94403	8.01227e-05	0.00248766
ENSMUSG00000001687	Ubl3	24109	5958.18	-0.171035	0.0433706	-3.94357	8.02767e-05	0.00248789
ENSMUSG00000102117	Rpsa-ps1	665237	566.336	0.466434	0.118288	3.94322	8.03961e-05	0.00248789
ENSMUSG00000040359	Ufl1	67490	1349.12	-0.228389	0.0579515	-3.94104	8.11278e-05	0.00250639
ENSMUSG00000060510	Zfp266	77519	1945.48	-0.261452	0.0663543	-3.94025	8.13983e-05	0.00250648
ENSMUSG00000069114	Zbtb10	229055	506.46	-0.246001	0.0624273	-3.94059	8.12813e-05	0.00250648
ENSMUSG00000008489	Elavl2	15569	3650.48	-0.299068	0.0759277	-3.93885	8.1873e-05	0.00251235
ENSMUSG00000040021	Lats1	16798	1995.49	-0.229543	0.0582717	-3.93918	8.1761e-05	0.00251235
ENSMUSG00000056849	Gm16415	100042767	104.269	0.45254	0.114902	3.9385	8.19915e-05	0.00251235
ENSMUSG00000033949	Trim36	28105	347.065	-0.341123	0.0866223	-3.93805	8.21466e-05	0.00251299
ENSMUSG00000024974	Smc3	13006	2598.24	-0.205125	0.05211	-3.93638	8.27206e-05	0.00252642
ENSMUSG00000033706	Smyd5	232187	1977.84	0.190924	0.0485194	3.93501	8.31941e-05	0.00253674
ENSMUSG00000031902	Nfatc3	18021	595.406	-0.196654	0.0499982	-3.93323	8.38119e-05	0.00254674
ENSMUSG00000033960	Jcad	240185	4613.47	-0.324284	0.0824544	-3.93289	8.39301e-05	0.00254674
ENSMUSG00000037492	Zmat4	320158	2291.91	-0.264766	0.0673084	-3.93363	8.3672e-05	0.00254674
ENSMUSG00000032359	Ctsh	13036	411.019	0.430208	0.109422	3.93165	8.43653e-05	0.00255168
ENSMUSG00000078695	Cisd3	217149	559.012	0.291097	0.0740379	3.93173	8.43381e-05	0.00255168
ENSMUSG00000002329	Mdp1	67881	1478.26	0.220629	0.0561443	3.92967	8.50614e-05	0.00255258
ENSMUSG00000021171	Esyt2	52635	2295.69	-0.281569	0.0716528	-3.92963	8.50768e-05	0.00255258
ENSMUSG00000027358	Bmp2	12156	144.211	-0.294657	0.0749768	-3.92997	8.49557e-05	0.00255258
ENSMUSG00000041570	Camsap2	67886	7078.11	-0.219051	0.0557381	-3.93001	8.49419e-05	0.00255258
ENSMUSG00000045128	Rpl18a	76808	3774.81	0.383643	0.097596	3.93093	8.46174e-05	0.00255258
ENSMUSG00000044709	Gemin7	69731	741.339	0.269508	0.068665	3.92497	8.6741e-05	0.00259834
ENSMUSG00000017485	Top2b	21974	5233.81	-0.206964	0.0527667	-3.92225	8.77243e-05	0.00262003
ENSMUSG00000048782	Insc	233752	179.615	-0.403726	0.102934	-3.9222	8.77449e-05	0.00262003
ENSMUSG00000060176	Kif27	75050	162.261	-0.318168	0.0811583	-3.92034	8.84254e-05	0.00263615
ENSMUSG00000023025	Larp4	207214	2185.33	-0.26101	0.0666598	-3.91556	9.0196e-05	0.00268466
ENSMUSG00000021822	Plau	18792	152.235	0.523075	0.133634	3.91424	9.06903e-05	0.00269509
ENSMUSG00000042686	Jph1	57339	878.694	-0.288563	0.0737489	-3.91277	9.12418e-05	0.00270718
ENSMUSG00000027803	Wwtr1	97064	582.348	-0.274086	0.0701237	-3.90861	9.28293e-05	0.00274992
ENSMUSG00000040729	Cep126	234915	650.371	-0.2831	0.0724413	-3.908	9.30641e-05	0.00275252
ENSMUSG00000068270	Shroom4	208431	242.682	-0.462077	0.118282	-3.90658	9.36099e-05	0.0027643
ENSMUSG00000020640	Itsn2	20403	2037.15	-0.282936	0.0724468	-3.90543	9.40592e-05	0.00277319
ENSMUSG00000021493	Pdlim7	67399	2046.2	0.335168	0.0858627	3.90354	9.47976e-05	0.00278182
ENSMUSG00000035686	Thrsp	21835	449.167	0.451412	0.115641	3.90357	9.47826e-05	0.00278182
ENSMUSG00000091086	Rpl6l	432502	2459.83	0.308395	0.0790005	3.9037	9.47321e-05	0.00278182
ENSMUSG00000022052	Ppp2r2a	71978	3447.94	-0.15504	0.0397263	-3.90271	9.51213e-05	0.0027846
ENSMUSG00000063065	Mapk3	26417	5850.91	0.277942	0.0712208	3.90254	9.51897e-05	0.0027846
ENSMUSG00000024515	Smad4	17128	1531.61	-0.216496	0.0555049	-3.90049	9.60002e-05	0.00280358
ENSMUSG00000027164	Traf6	22034	916.061	-0.181011	0.0464159	-3.89976	9.62899e-05	0.00280364
ENSMUSG00000027488	Snta1	20648	1285.11	0.254553	0.0652944	3.89854	9.67761e-05	0.00281342
ENSMUSG00000042419	Nfkbil1	18038	234.457	0.338156	0.0867854	3.89646	9.76084e-05	0.00283322
ENSMUSG00000038250	Usp38	74841	1210.99	-0.174304	0.044759	-3.89427	9.84939e-05	0.00285449
ENSMUSG00000063317	Usp31	76179	6069.31	-0.222392	0.0571185	-3.89351	9.88047e-05	0.00285907
ENSMUSG00000070733	Fryl	72313	3506.26	-0.266092	0.0683986	-3.89031	0.000100115	0.00289251
ENSMUSG00000021904	Sema3g	218877	185.905	-0.540796	0.139046	-3.88933	0.000100521	0.00289978
ENSMUSG00000018381	Abi3	66610	36.8141	0.566932	0.145801	3.88839	0.000100912	0.00290241
ENSMUSG00000035285	Nat14	269854	1985.79	0.296596	0.0762779	3.88836	0.000100922	0.00290241
ENSMUSG00000026958	Dpp7	83768	1076.15	0.201074	0.051718	3.8879	0.000101116	0.00290351
ENSMUSG00000024383	Map3k2	26405	1965.22	-0.270279	0.0695343	-3.88699	0.000101495	0.00290993
ENSMUSG00000028347	Tmeff1	230157	3141.06	-0.187516	0.0482768	-3.88419	0.000102672	0.00293919
ENSMUSG00000032258	Lca5	75782	562.45	-0.194227	0.0500234	-3.88273	0.000103292	0.00295241
ENSMUSG00000020137	Thap2	66816	548.8	-0.292908	0.0754953	-3.87981	0.000104536	0.00297495
ENSMUSG00000021027	Ralgapa1	56784	6448.33	-0.267633	0.0689882	-3.8794	0.000104716	0.00297495
ENSMUSG00000021690	Jmy	57748	2845.09	-0.200415	0.0516559	-3.87981	0.000104539	0.00297495
ENSMUSG00000049100	Pcdh10	18526	7749.21	-0.22632	0.0583348	-3.87968	0.000104593	0.00297495
ENSMUSG00000000416	Cttnbp2	30785	5384.4	-0.209014	0.0538834	-3.87901	0.000104884	0.00297521
ENSMUSG00000026701	Prdx6	11758	7917.92	0.237572	0.0612615	3.87799	0.000105322	0.0029831
ENSMUSG00000047368	Abhd17b	226016	1372.1	-0.218458	0.056365	-3.87578	0.000106285	0.00300584
ENSMUSG00000029560	Snx8	231834	714.602	0.297076	0.0766973	3.87335	0.000107347	0.00302763
ENSMUSG00000039100	2021-03-06	223455	12569.5	-0.213714	0.0551855	-3.87264	0.000107662	0.00302763
ENSMUSG00000041538	H2-Ob	15002	48.2839	0.823523	0.212624	3.87314	0.000107442	0.00302763
ENSMUSG00000061979	Rcc1l	94254	660.067	0.282381	0.0729185	3.87255	0.000107702	0.00302763
ENSMUSG00000031229	Atrx	22589	8890.68	-0.318918	0.0823765	-3.87146	0.000108184	0.00303206
ENSMUSG00000074578	Zfas1	68949	772.169	0.335158	0.0865687	3.87158	0.000108132	0.00303206
ENSMUSG00000028284	Map3k7	26409	2753.8	-0.171563	0.0443212	-3.8709	0.000108435	0.00303456
ENSMUSG00000050697	Prkaa1	105787	1578.68	-0.199714	0.0516028	-3.87021	0.00010874	0.00303856
ENSMUSG00000022321	Cdh10	320873	1556.74	-0.286018	0.0739448	-3.86799	0.000109737	0.00305728
ENSMUSG00000003934	Efnb3	13643	4719.36	-0.201993	0.0522432	-3.8664	0.000110456	0.00307274
ENSMUSG00000022516	Nudt16l1	66911	1162.6	0.321122	0.0830695	3.8657	0.000110771	0.00307693
ENSMUSG00000033579	Fa2h	338521	1289.99	-0.364556	0.0943315	-3.86463	0.000111258	0.00308131
ENSMUSG00000055409	Nell1	338352	2032.09	-0.287159	0.0742983	-3.86495	0.00011111	0.00308131
ENSMUSG00000074896	Ifit3	15959	520.809	0.480318	0.124311	3.86386	0.00011161	0.00308649
ENSMUSG00000037730	Mynn	80732	651.219	-0.234286	0.060653	-3.86273	0.000112129	0.00309628
ENSMUSG00000087590	Epb41l4aos	69749	126.743	0.432043	0.111903	3.86087	0.000112983	0.00311528
ENSMUSG00000062209	Erbb4	13869	3469.05	-0.321183	0.0831997	-3.86039	0.000113208	0.00311689
ENSMUSG00000040648	Ppip5k2	227399	1795.54	-0.241699	0.0626241	-3.85952	0.00011361	0.00311877
ENSMUSG00000047146	Tet1	52463	664.859	-0.315257	0.0816791	-3.8597	0.000113525	0.00311877
ENSMUSG00000020841	Cpd	12874	4696.27	-0.211072	0.0546967	-3.85895	0.000113875	0.00312149
ENSMUSG00000025137	Pcyt2	68671	3544.5	0.286448	0.0742503	3.85786	0.000114382	0.00313078
ENSMUSG00000035798	Zdhhc17	320150	5291.79	-0.228428	0.0592297	-3.85665	0.000114953	0.00314182
ENSMUSG00000023048	Prr13	66151	1467.04	0.298954	0.0775337	3.8558	0.000115352	0.00314815
ENSMUSG00000036499	Eea1	216238	2730.99	-0.264835	0.0686965	-3.85515	0.000115658	0.00315188
ENSMUSG00000026098	Pms1	227099	175.442	-0.339843	0.0881787	-3.85403	0.000116189	0.00316176
ENSMUSG00000080859	Rpl10-ps1	100043391	1312.69	0.292166	0.0758601	3.85138	0.000117453	0.00319153
ENSMUSG00000074259	Gramd2	546134	727.697	0.237674	0.0617206	3.85081	0.000117729	0.00319439
ENSMUSG00000045210	Vcpip1	70675	3748.01	-0.235181	0.0610839	-3.85013	0.000118054	0.00319855
ENSMUSG00000022112	Gpc5	103978	1136.21	-0.183791	0.0477451	-3.84941	0.000118403	0.00320151
ENSMUSG00000057098	Ebf1	13591	243.5	-0.465699	0.120986	-3.8492	0.000118505	0.00320151
ENSMUSG00000021719	Rgs7bp	52882	10125.6	-0.32706	0.0850035	-3.84761	0.000119278	0.00321312
ENSMUSG00000021945	Zmym2	76007	3952.75	-0.234684	0.0610046	-3.84698	0.000119582	0.00321397
ENSMUSG00000067038	Rps12-ps3	100034727	607.255	0.388378	0.10096	3.84684	0.000119653	0.00321397
ENSMUSG00000001750	Tcirg1	27060	873.961	0.344941	0.089705	3.84528	0.000120414	0.00321929
ENSMUSG00000027472	Pdrg1	68559	1495.66	0.221545	0.0576371	3.8438	0.000121145	0.00321929
ENSMUSG00000030660	Pik3c2a	18704	1622.86	-0.306005	0.0796067	-3.84397	0.000121062	0.00321929
ENSMUSG00000032436	Cmtm7	102545	74.2507	0.478172	0.12437	3.84474	0.000120682	0.00321929
ENSMUSG00000045176	Borcs6	71923	699.607	0.294142	0.0765271	3.84363	0.000121226	0.00321929
ENSMUSG00000046062	Ppp1r15b	108954	2648.64	-0.147143	0.0382725	-3.84462	0.000120741	0.00321929
ENSMUSG00000048865	Arhgap30	226652	181.643	0.347368	0.0903436	3.84496	0.000120571	0.00321929
ENSMUSG00000055373	Fut9	14348	6242.14	-0.365604	0.0950812	-3.84518	0.000120465	0.00321929
ENSMUSG00000005534	Insr	16337	2994.05	-0.185947	0.0484016	-3.84175	0.000122161	0.00323951
ENSMUSG00000025860	Xiap	11798	4765.25	-0.268276	0.0698478	-3.84086	0.000122605	0.0032421
ENSMUSG00000063297	Luzp2	233271	1480.27	-0.49765	0.129557	-3.84117	0.00012245	0.0032421
ENSMUSG00000002227	Mov10	17454	588.616	0.342732	0.0892675	3.83938	0.000123346	0.0032571
ENSMUSG00000026956	Uap1l1	227620	702.73	0.244408	0.0636771	3.83825	0.000123916	0.00326698
ENSMUSG00000043391	2510009E07Rik	72190	2983.1	-0.160998	0.0419492	-3.83794	0.000124069	0.00326698
ENSMUSG00000067860	Zic3	22773	177.865	-0.445053	0.116003	-3.83658	0.000124762	0.00328061
ENSMUSG00000025326	Ube3a	22215	2980.57	-0.466157	0.121533	-3.83566	0.000125228	0.00328502
ENSMUSG00000032269	Htr3a	15561	246.051	0.429439	0.111963	3.83556	0.000125281	0.00328502
ENSMUSG00000020962	Gtf2a1	83602	1923.26	-0.179486	0.0468207	-3.83347	0.000126348	0.00330836
ENSMUSG00000026827	Gpd2	14571	4219.92	-0.244471	0.0638033	-3.83164	0.000127294	0.00331922
ENSMUSG00000027959	Sass6	72776	211.705	-0.264033	0.0689009	-3.83207	0.000127072	0.00331922
ENSMUSG00000033228	Scaf11	72193	2857.76	-0.234262	0.0611382	-3.83168	0.000127271	0.00331922
ENSMUSG00000057914	Cacnb2	12296	2139.64	-0.165426	0.0431909	-3.83011	0.000128085	0.00333519
ENSMUSG00000029559	2210016L21Rik	72357	4151.08	0.257561	0.0673037	3.82685	0.000129796	0.00337505
ENSMUSG00000021596	Mctp1	78771	2614.79	-0.322913	0.0844176	-3.82518	0.000130675	0.00339319
ENSMUSG00000028082	Sh3d19	27059	1029.91	-0.244524	0.063934	-3.82463	0.00013097	0.00339614
ENSMUSG00000035245	Eogt	101351	1069.25	-0.211255	0.0552697	-3.82226	0.000132234	0.00341945
ENSMUSG00000038224	Serpinf2	18816	22.7913	0.999828	0.261574	3.82236	0.000132183	0.00341945
ENSMUSG00000002345	Borcs8	72368	853.508	0.341796	0.0894345	3.82175	0.00013251	0.00342186
ENSMUSG00000033569	Adgrb3	210933	4231.1	-0.197257	0.0516322	-3.82043	0.000133222	0.00343078
ENSMUSG00000049176	Frmpd4	333605	3444	-0.265872	0.0695895	-3.82057	0.000133142	0.00343078
ENSMUSG00000002012	Pnck	93843	3496.85	0.282304	0.0739305	3.8185	0.000134263	0.00343867
ENSMUSG00000025324	Atp10a	11982	390.063	-0.522628	0.136856	-3.81883	0.000134087	0.00343867
ENSMUSG00000037876	Jmjd1c	108829	3808.01	-0.228883	0.0599334	-3.81896	0.000134018	0.00343867
ENSMUSG00000047084	Ngrn	83485	1195.35	0.196329	0.0514025	3.81945	0.000133752	0.00343867
ENSMUSG00000022142	Nup155	170762	1068.74	-0.225547	0.0590992	-3.81641	0.000135408	0.00345075
ENSMUSG00000028207	Asph	65973	4347.53	-0.159318	0.0417417	-3.81676	0.000135214	0.00345075
ENSMUSG00000048661	Lemd3	380664	1909.36	-0.197625	0.0517777	-3.81681	0.00013519	0.00345075
ENSMUSG00000051041	Olfml1	244198	472.4	-0.482554	0.126446	-3.81629	0.000135472	0.00345075
ENSMUSG00000006315	Tmem147	69804	1923.89	0.249368	0.0653568	3.81549	0.000135914	0.0034573
ENSMUSG00000031715	Smarca5	93762	2668.49	-0.237474	0.0622715	-3.81353	0.000136998	0.00348016
ENSMUSG00000025757	Hspa4l	18415	8866.87	-0.262394	0.0688387	-3.81172	0.000138003	0.0034964
ENSMUSG00000031901	Dus2	66369	612.127	0.214501	0.0562744	3.81171	0.000138011	0.0034964
ENSMUSG00000031134	Rbmx	19655	2363.13	-0.134754	0.0353587	-3.81104	0.000138382	0.00350106
ENSMUSG00000032375	Aph1b	208117	1387.22	-0.196963	0.0516918	-3.81034	0.000138775	0.00350156
ENSMUSG00000052656	Rnf103	22644	1964.42	-0.162583	0.0426659	-3.81062	0.000138619	0.00350156
ENSMUSG00000030612	Mrpl46	67308	840.28	0.268571	0.0705087	3.80905	0.0001395	0.00351509
ENSMUSG00000006782	Cnp	12799	11395.6	-0.281656	0.073969	-3.80775	0.000140236	0.00351945
ENSMUSG00000019927	Ube2d1	216080	1753.3	-0.108736	0.0285535	-3.80816	0.000140005	0.00351945
ENSMUSG00000041460	Cacna2d4	319734	175.643	-0.431813	0.113401	-3.80783	0.00014019	0.00351945
ENSMUSG00000017299	Dnttip1	76233	487.136	0.169402	0.0445004	3.80674	0.00014081	0.00352911
ENSMUSG00000027806	Tsc22d2	72033	1977.53	-0.169202	0.044462	-3.80555	0.000141491	0.00354143
ENSMUSG00000037805	Rpl10a	19896	5072.24	0.285913	0.0751424	3.80494	0.000141836	0.00354533
ENSMUSG00000026393	Nek7	59125	1844.59	-0.226946	0.0596694	-3.80339	0.000142729	0.00356289
ENSMUSG00000025016	Tm9sf3	107358	8174.4	-0.19421	0.0511212	-3.79902	0.000145271	0.00362152
ENSMUSG00000036990	Otud4	73945	3345.62	-0.186944	0.0492571	-3.79527	0.000147483	0.00367179
ENSMUSG00000031365	Zfp275	27081	1518.38	-0.193367	0.0509708	-3.79368	0.000148432	0.0036856
ENSMUSG00000034158	Lrrc58	320184	4619.17	-0.21548	0.0567996	-3.79368	0.000148429	0.0036856
ENSMUSG00000004347	Pde1c	18575	553.791	-0.370086	0.0976176	-3.79119	0.00014993	0.00370805
ENSMUSG00000028843	Sh3bgrl3	73723	2054.36	0.310616	0.0819289	3.79129	0.000149866	0.00370805
ENSMUSG00000050335	Lgals3	16854	66.7952	0.794944	0.209652	3.79173	0.000149603	0.00370805
ENSMUSG00000031112	Stk26	70415	424.46	-0.455311	0.120154	-3.78938	0.000151025	0.00373019
ENSMUSG00000034297	Med13	327987	3839.84	-0.234724	0.0619523	-3.78879	0.000151386	0.00373418
ENSMUSG00000019787	Trdn	76757	19.9155	-1.08831	0.287387	-3.7869	0.000152536	0.00375761
ENSMUSG00000060572	Mfap2	17150	182.505	0.293668	0.0775839	3.78516	0.00015361	0.00377909
ENSMUSG00000024070	Prkd3	75292	803.132	-0.249219	0.0658471	-3.78481	0.000153824	0.00377938
ENSMUSG00000027965	Olfm3	229759	1772.24	-0.342537	0.0905402	-3.78325	0.000154792	0.00379818
ENSMUSG00000055762	Eef1d	66656	2941.47	0.228809	0.0604979	3.7821	0.000155513	0.00381089
ENSMUSG00000026395	Ptprc	19264	248.527	0.516231	0.136509	3.78166	0.000155787	0.00381261
ENSMUSG00000029095	Ablim2	231148	5947.91	0.135522	0.0358467	3.78059	0.000156459	0.00382406
ENSMUSG00000024526	Cidea	12683	130.745	0.348274	0.0921626	3.77891	0.000157515	0.00383983
ENSMUSG00000055763	Rybp-ps	628746	331.823	-0.333816	0.0883305	-3.77917	0.00015735	0.00383983
ENSMUSG00000034848	Ttc21b	73668	710.731	-0.215261	0.0569734	-3.77826	0.000157927	0.00384486
ENSMUSG00000021712	Trim23	81003	3413.04	-0.275097	0.0728935	-3.77395	0.000160682	0.00390686
ENSMUSG00000026857	Ntmt1	66617	907.625	0.222694	0.0590484	3.77137	0.000162354	0.00393793
ENSMUSG00000029190	D5Ertd579e	320661	6012.15	-0.137766	0.0365299	-3.77133	0.00016238	0.00393793
ENSMUSG00000015766	Eps8	13860	1383.22	-0.230379	0.0611087	-3.76998	0.00016326	0.00395415
ENSMUSG00000043991	Pura	19290	15508.6	-0.254479	0.067515	-3.76923	0.000163754	0.00395588
ENSMUSG00000060791	Gmfg	63986	28.8377	0.644251	0.170919	3.76933	0.000163686	0.00395588
ENSMUSG00000074918	Inafm2	100043272	1706.67	-0.175207	0.0464943	-3.76835	0.000164329	0.00396465
ENSMUSG00000021767	Kat6b	54169	3097.08	-0.212783	0.0564727	-3.76789	0.00016463	0.0039668
ENSMUSG00000044098	Rsbn1	229675	887.588	-0.357705	0.0949874	-3.76581	0.000166007	0.00399485
ENSMUSG00000031875	Cmtm3	68119	304.837	0.324098	0.0860978	3.7643	0.000167019	0.00400889
ENSMUSG00000033014	Trim33	94093	3244.55	-0.200461	0.0532492	-3.76458	0.000166829	0.00400889
ENSMUSG00000016194	Hsd11b1	15483	326.35	-0.421585	0.112033	-3.76303	0.000167865	0.00402389
ENSMUSG00000042680	Garem1	381126	1049.4	-0.31037	0.0824855	-3.76272	0.000168074	0.00402389
ENSMUSG00000060733	Ipmk	69718	1586.34	-0.150888	0.0401056	-3.76227	0.000168375	0.00402594
ENSMUSG00000020154	Ptprb	19263	1173.99	-0.549439	0.146055	-3.76185	0.000168659	0.00402665
ENSMUSG00000025212	Sfxn3	94280	5283.3	0.142377	0.0378502	3.76159	0.000168834	0.00402665
ENSMUSG00000064325	Hhip	15245	187.465	-0.482749	0.128354	-3.76108	0.000169184	0.00402984
ENSMUSG00000009687	Fxyd5	18301	544.787	0.33883	0.0901435	3.75879	0.000170739	0.00406173
ENSMUSG00000031851	Ntpcr	66566	708.807	0.223781	0.0595641	3.75699	0.000171972	0.00408586
ENSMUSG00000034653	Ythdc2	240255	1636.9	-0.271528	0.0722905	-3.75607	0.000172602	0.00409564
ENSMUSG00000039879	Heca	380629	1047.09	-0.253519	0.0675076	-3.75541	0.000173057	0.00410123
ENSMUSG00000001156	Mxd1	17119	1088.67	-0.191091	0.0509043	-3.75392	0.000174088	0.00411006
ENSMUSG00000003762	Coq8b	76889	859.923	0.240179	0.0639709	3.7545	0.000173686	0.00411006
ENSMUSG00000038658	Ric1	226089	2138.97	-0.232512	0.0619367	-3.75403	0.000174016	0.00411006
ENSMUSG00000003452	Bicd1	12121	2299.6	-0.278919	0.0743239	-3.75274	0.000174909	0.00412253
ENSMUSG00000026153	Fam135a	68187	1679.85	-0.272179	0.072532	-3.75253	0.000175057	0.00412253
ENSMUSG00000024349	Tmem173	72512	123.22	0.387209	0.103223	3.75119	0.000175996	0.00413944
ENSMUSG00000020776	Fbf1	217335	4122.57	0.228008	0.0608284	3.74839	0.000177976	0.00415469
ENSMUSG00000028673	Fuca1	71665	1197.58	0.188847	0.0503801	3.74845	0.000177931	0.00415469
ENSMUSG00000035580	Kcnh8	211468	42.1945	-0.50905	0.135777	-3.74915	0.000177436	0.00415469
ENSMUSG00000036769	Wdr44	72404	733.398	-0.26946	0.0718829	-3.74859	0.000177829	0.00415469
ENSMUSG00000042359	Osbpl6	99031	3406.58	-0.193896	0.0517136	-3.74943	0.000177239	0.00415469
ENSMUSG00000025812	Pard3	93742	923.011	-0.226095	0.0603724	-3.74501	0.000180385	0.00418485
ENSMUSG00000030243	Recql	19691	694.596	-0.160279	0.0427932	-3.74543	0.000180085	0.00418485
ENSMUSG00000032215	Rsl24d1	225215	1048.3	0.195636	0.0522351	3.74529	0.000180183	0.00418485
ENSMUSG00000068015	Lrch1	380916	748.769	-0.220802	0.0589532	-3.74537	0.000180129	0.00418485
ENSMUSG00000035439	Haus8	76478	321.301	0.298066	0.0796117	3.744	0.000181117	0.00419662
ENSMUSG00000018428	Akap1	11640	1828.08	-0.137679	0.0368035	-3.74094	0.000183336	0.00423908
ENSMUSG00000045589	Frrs1l	230235	13677.3	-0.288913	0.0772381	-3.74054	0.000183623	0.00423908
ENSMUSG00000057841	Rpl32	19951	5808.24	0.30572	0.0817317	3.74054	0.000183628	0.00423908
ENSMUSG00000020732	Rab37	58222	409.485	-0.511506	0.136823	-3.73845	0.000185159	0.0042635
ENSMUSG00000027674	Pex5l	58869	5099.65	-0.304234	0.0813839	-3.73826	0.000185298	0.0042635
ENSMUSG00000036528	Ppfibp2	19024	471.801	-0.284455	0.0760948	-3.73816	0.00018537	0.0042635
ENSMUSG00000029571	Tmem106b	71900	7639.78	-0.246159	0.0658965	-3.73553	0.000187318	0.00430303
ENSMUSG00000073725	Lmbrd1	68421	7058.91	-0.194479	0.0520736	-3.7347	0.00018794	0.00431203
ENSMUSG00000009470	Tnpo1	238799	3851.74	-0.253129	0.067812	-3.73281	0.000189359	0.00432866
ENSMUSG00000061353	Cxcl12	20315	1768.93	-0.396371	0.10617	-3.73336	0.000188939	0.00432866
ENSMUSG00000039967	Zfp292	30046	1985.19	-0.272913	0.0731211	-3.73234	0.000189711	0.00433143
ENSMUSG00000031483	Erlin2	244373	2184.39	-0.163202	0.0437353	-3.73157	0.000190287	0.0043393
ENSMUSG00000021097	Clmn	94040	5386.22	-0.255058	0.0683764	-3.7302	0.000191329	0.00435774
ENSMUSG00000005371	Fbxo11	225055	5829.43	-0.135334	0.0362948	-3.72874	0.000192438	0.00437236
ENSMUSG00000036902	Neto2	74513	2833.15	-0.331122	0.0887983	-3.72892	0.000192299	0.00437236
ENSMUSG00000026836	Acvr1	11477	1077.76	-0.173098	0.0464388	-3.72743	0.000193441	0.00438983
ENSMUSG00000040372	Gpr63	81006	165.742	-0.468688	0.125785	-3.7261	0.000194465	0.00440771
ENSMUSG00000033863	Klf9	16601	4420.23	-0.376556	0.10115	-3.72273	0.000197078	0.00446155
ENSMUSG00000019802	Sec63	140740	3843.7	-0.146273	0.039326	-3.71948	0.00019963	0.00451385
ENSMUSG00000010392	Gosr1	53334	2037.18	-0.140095	0.0376985	-3.7162	0.000202242	0.00455712
ENSMUSG00000022540	Rogdi	66049	4633.17	0.268212	0.0721745	3.71616	0.000202273	0.00455712
ENSMUSG00000042699	Dhx9	13211	5295.8	-0.282789	0.0760949	-3.71627	0.000202189	0.00455712
ENSMUSG00000034867	Ankrd27	245886	1713.67	0.151887	0.0408797	3.71547	0.000202826	0.00456408
ENSMUSG00000035310	Lin54	231506	553.109	-0.231129	0.0622216	-3.71461	0.00020352	0.00457419
ENSMUSG00000033458	Fan1	330554	425.447	-0.252933	0.0681166	-3.71324	0.000204623	0.00459346
ENSMUSG00000024013	Fgd2	26382	299.496	0.369576	0.0995455	3.71263	0.000205114	0.00459347
ENSMUSG00000050188	Lsm10	116748	215.867	0.296164	0.0797656	3.71294	0.000204869	0.00459347
ENSMUSG00000021339	Mrs2	380836	1036.88	-0.265907	0.0716483	-3.71128	0.00020621	0.00460975
ENSMUSG00000022089	Bin3	57784	443.953	0.2064	0.0556163	3.71113	0.000206333	0.00460975
ENSMUSG00000063894	Zkscan8	93681	1182.91	-0.304798	0.0821607	-3.70978	0.00020744	0.00462895
ENSMUSG00000087178	A230056P14Rik	320845	682.639	-0.340271	0.0917384	-3.70914	0.000207964	0.00463512
ENSMUSG00000036863	Syde2	214804	138.533	-0.320904	0.0865355	-3.70836	0.000208609	0.00463845
ENSMUSG00000037486	Asxl2	75302	1726.04	-0.228171	0.0615266	-3.7085	0.000208493	0.00463845
ENSMUSG00000006589	Aprt	11821	734.732	0.296519	0.0799759	3.70761	0.000209227	0.00464667
ENSMUSG00000034910	Pygo1	72135	2260.55	-0.148951	0.0401848	-3.70666	0.000210009	0.00465852
ENSMUSG00000046982	Tshz1	110796	1351.71	-0.292525	0.0789425	-3.70555	0.000210934	0.00466798
ENSMUSG00000071722	Spin4	270624	31.5822	-0.498485	0.134514	-3.70581	0.000210715	0.00466798
ENSMUSG00000024963	Dnajc4	57431	490.654	0.249859	0.0674748	3.703	0.000213065	0.00470401
ENSMUSG00000035024	Ncapd3	78658	1284.45	-0.195455	0.0527804	-3.70317	0.000212923	0.00470401
ENSMUSG00000069089	Cdk7	12572	2373.3	-0.220211	0.0594816	-3.70218	0.000213758	0.00471375
ENSMUSG00000022216	Psme1	19186	1266.93	0.223926	0.0605062	3.70087	0.000214861	0.00473097
ENSMUSG00000061273	Mmgt1	236792	1847.48	-0.164923	0.044572	-3.70014	0.000215478	0.00473494
ENSMUSG00000009207	Lnpk	69605	2321.73	-0.292869	0.0791912	-3.69826	0.000217087	0.00475706
ENSMUSG00000039046	Usp6nl	98910	1222.24	-0.158623	0.0428935	-3.69807	0.000217246	0.00475706
ENSMUSG00000056342	Usp34	17847	6238.14	-0.297476	0.08043	-3.69857	0.000216817	0.00475706
ENSMUSG00000048410	Zfp407	240476	777.132	-0.203006	0.0549089	-3.69715	0.000218034	0.00476874
ENSMUSG00000030201	Lrp6	16974	2711.07	-0.183939	0.0497817	-3.69491	0.000219969	0.00480173
ENSMUSG00000030643	Rab30	75985	446.935	-0.323586	0.0875787	-3.6948	0.000220056	0.00480173
ENSMUSG00000040584	Abcb1a	18671	905.666	-0.590105	0.159729	-3.69442	0.00022039	0.00480343
ENSMUSG00000018846	Pank3	211347	3347.1	-0.292259	0.0791302	-3.6934	0.000221275	0.00481711
ENSMUSG00000042604	Kcna4	16492	1342.79	-0.239274	0.0647987	-3.69258	0.000221994	0.0048195
ENSMUSG00000045975	C2cd2	207781	708.54	-0.159562	0.0432137	-3.69239	0.000222157	0.0048195
ENSMUSG00000101439	Gm336	240539	123.61	-0.723396	0.195914	-3.69242	0.000222134	0.0048195
ENSMUSG00000087301	Gm13629	100038743	178.273	-0.290852	0.0787853	-3.6917	0.000222761	0.00482142
ENSMUSG00000090112	Shprh	268281	2335.42	-0.237701	0.0643859	-3.69181	0.00022266	0.00482142
ENSMUSG00000037458	Azin1	54375	6628.98	-0.226248	0.0613022	-3.6907	0.000223636	0.0048292
ENSMUSG00000038215	Cep44	382010	420.283	-0.190872	0.0517157	-3.69079	0.000223563	0.0048292
ENSMUSG00000021838	Samd4	74480	2022.48	-0.224131	0.0607438	-3.68977	0.000224458	0.00484136
ENSMUSG00000038065	Mturn	68235	6255.4	-0.117517	0.0318561	-3.68898	0.000225155	0.00485081
ENSMUSG00000041763	Tpp2	22019	2406.34	-0.27689	0.0750819	-3.68784	0.000226163	0.00486692
ENSMUSG00000054604	Cggbp1	106143	2940.06	-0.161964	0.0439271	-3.68711	0.000226815	0.00487535
ENSMUSG00000055717	Slain1	105439	1823.12	-0.189663	0.0514558	-3.68594	0.000227863	0.00489227
ENSMUSG00000025531	Chm	12662	2353.27	-0.342773	0.0930467	-3.68388	0.000229711	0.00492492
ENSMUSG00000045055	Rpsa-ps2	622655	1376.99	0.346382	0.0940321	3.68366	0.00022991	0.00492492
ENSMUSG00000025538	Sumf2	67902	554.213	0.199686	0.0542546	3.68055	0.000232735	0.00497973
ENSMUSG00000000278	Scpep1	74617	593.6	0.176369	0.0479393	3.679	0.000234152	0.00498473
ENSMUSG00000017412	Cacnb4	12298	7720.74	-0.302409	0.0822011	-3.67889	0.000234252	0.00498473
ENSMUSG00000022299	Slc25a32	69906	390.745	-0.308206	0.0837567	-3.67978	0.000233437	0.00498473
ENSMUSG00000025262	Fam120c	207375	1848.78	-0.319086	0.0867356	-3.67884	0.0002343	0.00498473
ENSMUSG00000028514	Usp24	329908	5018.57	-0.159869	0.0434477	-3.67957	0.00023363	0.00498473
ENSMUSG00000033220	Rac2	19354	110.409	0.516497	0.140471	3.67688	0.000236103	0.00501739
ENSMUSG00000015852	Fcrls	80891	590.576	0.924472	0.251525	3.67547	0.000237412	0.00503948
ENSMUSG00000071862	Lrrtm2	107065	2973.22	-0.330664	0.0899818	-3.67479	0.00023804	0.00504711
ENSMUSG00000031283	Chrdl1	83453	616.804	-0.388349	0.105716	-3.6735	0.000239252	0.00506705
ENSMUSG00000000392	Fap	14089	112.696	-0.46144	0.125765	-3.66908	0.000243428	0.00514544
ENSMUSG00000018425	Dhx40	67487	1231.38	-0.165614	0.0451389	-3.669	0.000243503	0.00514544
ENSMUSG00000047648	Fbxo30	71865	444.159	-0.258655	0.0705099	-3.66836	0.000244112	0.0051525
ENSMUSG00000039270	Megf9	230316	7059.37	-0.231482	0.0631266	-3.66695	0.000245461	0.00517513
ENSMUSG00000015484	Fam163a	329274	307.531	-0.40087	0.109357	-3.6657	0.000246664	0.00518881
ENSMUSG00000039968	Rsbn1l	242860	1283.88	-0.215258	0.0587214	-3.66575	0.000246618	0.00518881
ENSMUSG00000021091	Serpina3n	20716	1353.06	0.67727	0.184826	3.66437	0.000247952	0.00519838
ENSMUSG00000030714	Sgf29	75565	332.927	0.221975	0.060571	3.66471	0.000247621	0.00519838
ENSMUSG00000048347	Pcdhb18	93889	312.364	-0.262176	0.0715463	-3.66443	0.000247894	0.00519838
ENSMUSG00000002458	Rgs19	56470	649.579	0.205853	0.0561949	3.66319	0.000249092	0.00521644
ENSMUSG00000030059	Tmf1	232286	1267.58	-0.32321	0.0882914	-3.66071	0.000251513	0.00525743
ENSMUSG00000041895	Wipi1	52639	856.245	-0.183173	0.0500388	-3.66061	0.000251611	0.00525743
ENSMUSG00000032531	Amotl2	56332	959.775	-0.215265	0.0588275	-3.65925	0.000252951	0.00527954
ENSMUSG00000060019	Gm10073	100042734	1147.13	0.447586	0.122372	3.6576	0.000254593	0.00530789
ENSMUSG00000033382	Trappc8	75964	2471.75	-0.227296	0.0621567	-3.65682	0.000255362	0.00531234
ENSMUSG00000038949	Cnst	226744	2147.51	-0.137137	0.0375019	-3.65681	0.000255374	0.00531234
ENSMUSG00000001025	S100a6	20200	557.978	0.499634	0.136685	3.65538	0.000256803	0.00532798
ENSMUSG00000024695	Zfp91	109910	6499.49	-0.154491	0.0422606	-3.65567	0.000256508	0.00532798
ENSMUSG00000032504	Pdcd6ip	18571	3749.94	-0.163047	0.0446102	-3.65492	0.000257264	0.00532798
ENSMUSG00000036916	Zfp280c	208968	1229.15	-0.268939	0.073578	-3.65516	0.000257019	0.00532798
ENSMUSG00000035045	Zc3h12b	547176	1224.79	-0.23674	0.0647962	-3.6536	0.000258589	0.0053495
ENSMUSG00000034274	Thoc5	107829	1316.37	0.136009	0.0372351	3.65272	0.000259474	0.00536189
ENSMUSG00000021738	Atxn7	246103	1447.06	-0.19219	0.0526286	-3.65182	0.000260386	0.00537481
ENSMUSG00000024242	Map4k3	225028	3027.55	-0.178205	0.0488055	-3.65134	0.000260874	0.00537895
ENSMUSG00000031561	Tenm3	23965	3333.43	-0.394896	0.108294	-3.64653	0.000265803	0.00545654
ENSMUSG00000039860	Srrm3	58212	3022.7	0.227599	0.0624126	3.64669	0.000265637	0.00545654
ENSMUSG00000059714	Flot1	14251	4133.47	0.262359	0.0719425	3.64679	0.000265537	0.00545654
ENSMUSG00000073563	Csnk1g3	70425	2557.81	-0.166125	0.045549	-3.64716	0.000265156	0.00545654
ENSMUSG00000034525	Ice1	218333	6815.63	-0.140171	0.0384465	-3.64588	0.00026648	0.00546445
ENSMUSG00000039853	Trim14	74735	16.6722	0.654885	0.179654	3.64525	0.000267129	0.00547175
ENSMUSG00000029722	Agfg2	231801	1871.73	0.168346	0.0461958	3.64419	0.000268238	0.00548433
ENSMUSG00000039361	Picalm	233489	5906.61	-0.162273	0.0445304	-3.6441	0.000268328	0.00548433
ENSMUSG00000034607	Pof1b	69693	39.5622	-0.47674	0.130874	-3.64274	0.000269751	0.00550054
ENSMUSG00000050552	Lamtor4	66096	1284.46	0.307713	0.0844784	3.6425	0.000270003	0.00550054
ENSMUSG00000067081	Asb18	208372	114.01	-0.397027	0.108993	-3.6427	0.000269791	0.00550054
ENSMUSG00000038156	Spon1	233744	3495.61	-0.249893	0.0686111	-3.64217	0.000270347	0.00550156
ENSMUSG00000037568	Vash2	226841	222.782	-0.286195	0.0786313	-3.63971	0.000272943	0.00554658
ENSMUSG00000075470	Alg10b	380959	1203.85	-0.376299	0.103393	-3.63952	0.000273152	0.00554658
ENSMUSG00000033991	Ttc37	218343	907.636	-0.296113	0.0813736	-3.63893	0.000273768	0.00554707
ENSMUSG00000038128	Camk4	12326	11206.4	-0.292478	0.0803741	-3.63896	0.000273745	0.00554707
ENSMUSG00000015542	Nat9	66176	593.616	0.274033	0.0753594	3.63635	0.000276531	0.00557889
ENSMUSG00000019990	Pde7b	29863	2076.4	-0.376237	0.103453	-3.63678	0.000276066	0.00557889
ENSMUSG00000037957	Wdr20	69641	905.49	-0.147382	0.040528	-3.63654	0.000276325	0.00557889
ENSMUSG00000094191	Rpl31-ps14	100043192	35.1839	0.623881	0.171535	3.63705	0.000275776	0.00557889
ENSMUSG00000001418	Glmp	56700	1310.1	0.209659	0.0577067	3.63318	0.000279951	0.0056418
ENSMUSG00000002603	Tgfb1	21803	179.419	0.368471	0.101457	3.6318	0.000281448	0.00566588
ENSMUSG00000022771	Ppil2	66053	2475.35	0.0918019	0.0252865	3.63048	0.000282899	0.00568897
ENSMUSG00000019762	Iyd	70337	28.6332	-0.82876	0.228465	-3.62752	0.000286153	0.0057328
ENSMUSG00000021125	Arg2	11847	116.559	-0.318317	0.0877499	-3.62755	0.000286122	0.0057328
ENSMUSG00000036820	Amdhd2	245847	655.192	0.278781	0.0768535	3.62744	0.000286247	0.0057328
ENSMUSG00000038007	Acer2	230379	371.148	-0.612912	0.168994	-3.62684	0.000286915	0.0057328
ENSMUSG00000052253	Zfp622	52521	1480.83	0.202933	0.0559524	3.62689	0.000286852	0.0057328
ENSMUSG00000020362	Cnot6	104625	2848.51	-0.174911	0.0482328	-3.62639	0.000287415	0.00573665
ENSMUSG00000036169	Sostdc1	66042	141.657	-0.91901	0.253482	-3.62554	0.00028836	0.00574328
ENSMUSG00000057406	Nsd2	107823	5069.42	-0.198339	0.0547033	-3.62572	0.000288154	0.00574328
ENSMUSG00000034947	Tmem106a	217203	68.9084	0.471426	0.130064	3.62457	0.00028944	0.00575865
ENSMUSG00000027882	Stxbp3	20912	881.85	-0.278736	0.0769251	-3.62347	0.00029068	0.00577174
ENSMUSG00000068615	Gjd2	14617	257.054	-0.224281	0.0618974	-3.62344	0.000290714	0.00577174
ENSMUSG00000021890	Eaf1	74427	926.974	-0.144033	0.0397668	-3.62193	0.000292415	0.00579936
ENSMUSG00000026102	Inpp1	16329	1351.43	-0.144689	0.039965	-3.62038	0.000294169	0.00580952
ENSMUSG00000036067	Slc2a6	227659	1226.77	0.234206	0.0646787	3.62107	0.000293386	0.00580952
ENSMUSG00000037487	Ubr5	70790	7970.29	-0.168718	0.0466022	-3.6204	0.000294151	0.00580952
ENSMUSG00000054659	Pm20d2	242377	88.394	-0.431366	0.119149	-3.62039	0.000294161	0.00580952
ENSMUSG00000020241	Col6a2	12834	921.207	0.362529	0.100164	3.61935	0.000295348	0.00581441
ENSMUSG00000024290	Rock1	19877	1490.18	-0.259529	0.0716983	-3.61974	0.0002949	0.00581441
ENSMUSG00000028416	Bag1	12017	4279.32	0.254927	0.0704323	3.61947	0.00029521	0.00581441
ENSMUSG00000038383	Pigu	228812	1039.62	0.110117	0.0304322	3.61844	0.000296385	0.00582871
ENSMUSG00000024431	Nr3c1	14815	4663.12	-0.252225	0.0697357	-3.61688	0.000298178	0.00585781
ENSMUSG00000029265	Dr1	13486	1830.54	-0.19905	0.0550392	-3.61652	0.000298589	0.00585973
ENSMUSG00000038797	Zscan2	22691	321.163	0.19746	0.0546275	3.61466	0.000300746	0.00589589
ENSMUSG00000025905	Oprk1	18387	583.898	-0.380621	0.105311	-3.61426	0.000301209	0.00589878
ENSMUSG00000062753	AI413582	106672	1026.18	0.289856	0.0802235	3.6131	0.000302553	0.00591273
ENSMUSG00000025931	Paqr8	74229	5221.25	-0.280151	0.0775678	-3.6117	0.000304202	0.00592639
ENSMUSG00000044022	Pcdhb21	93892	155.23	-0.419357	0.116104	-3.6119	0.000303962	0.00592639
ENSMUSG00000073062	Zxdb	668166	1225.91	-0.170402	0.0471791	-3.61182	0.00030406	0.00592639
ENSMUSG00000031095	Cul4b	72584	1634.5	-0.309637	0.0857474	-3.61104	0.000304973	0.00593366
ENSMUSG00000039419	Cntnap2	66797	3511.25	-0.299644	0.0829846	-3.61084	0.000305208	0.00593366
ENSMUSG00000032299	Commd4	66199	1330.62	0.249383	0.0690788	3.61013	0.000306043	0.00593756
ENSMUSG00000033499	Larp4b	217980	3665.75	-0.113819	0.0315276	-3.61013	0.000306042	0.00593756
ENSMUSG00000027016	Zfp385b	241494	1398.41	-0.173211	0.0479988	-3.60866	0.000307787	0.00596521
ENSMUSG00000070942	Il1rl2	107527	52.2254	0.446568	0.123769	3.60806	0.00030849	0.00597265
ENSMUSG00000031446	Cul4a	99375	2998.76	-0.12533	0.0347403	-3.60761	0.000309028	0.00597688
ENSMUSG00000032353	Tmed3	66111	946.696	0.251199	0.0696568	3.60623	0.000310675	0.00600255
ENSMUSG00000004849	Ap1s1	11769	8602.32	0.29234	0.0810863	3.60529	0.000311803	0.00601549
ENSMUSG00000027309	4930402H24Rik	228602	6618.49	-0.140495	0.0389786	-3.60441	0.000312869	0.00601549
ENSMUSG00000029482	Aacs	78894	1925.31	0.237778	0.065967	3.60449	0.000312764	0.00601549
ENSMUSG00000030275	Etnk1	75320	18983.4	-0.151663	0.042078	-3.60434	0.000312952	0.00601549
ENSMUSG00000055540	Epha6	13840	1086.59	-0.338268	0.0938449	-3.60455	0.0003127	0.00601549
ENSMUSG00000027276	Jag1	16449	309.049	-0.321861	0.0893201	-3.60345	0.000314018	0.00602978
ENSMUSG00000005089	Slc1a2	20511	108257	-0.227503	0.063155	-3.60229	0.00031543	0.00604729
ENSMUSG00000035469	Rcbtb1	71330	2251.42	-0.14611	0.0405618	-3.60217	0.000315575	0.00604729
ENSMUSG00000020887	A230052G05Rik	442796	29.8149	-0.495715	0.137728	-3.59923	0.000319166	0.0061036
ENSMUSG00000031403	Dkc1	245474	994.071	-0.141425	0.0392905	-3.59947	0.000318861	0.0061036
ENSMUSG00000017291	Taok1	216965	8106.42	-0.257126	0.0714691	-3.59772	0.000321021	0.00613282
ENSMUSG00000020224	Llph	66225	1246.58	0.206255	0.0573394	3.59709	0.000321802	0.00614146
ENSMUSG00000021638	Ocln	18260	262.267	-0.354062	0.0984428	-3.59663	0.000322366	0.00614596
ENSMUSG00000060534	Dcc	13176	421.977	-0.422924	0.117607	-3.59608	0.000323051	0.00615276
ENSMUSG00000026277	Stk25	59041	9355.1	0.1698	0.0472493	3.5937	0.000326017	0.00616717
ENSMUSG00000027962	Vcam1	22329	907.193	-0.368963	0.102679	-3.59336	0.000326443	0.00616717
ENSMUSG00000031592	Pcm1	18536	5148.5	-0.252344	0.0702228	-3.59348	0.000326296	0.00616717
ENSMUSG00000044456	Rin3	217835	137.56	0.431988	0.120186	3.59434	0.000325215	0.00616717
ENSMUSG00000055022	Cntn1	12805	15958.8	-0.244683	0.0680723	-3.59445	0.000325077	0.00616717
ENSMUSG00000056941	Commd7	99311	1207.12	0.159787	0.0444525	3.59456	0.000324941	0.00616717
ENSMUSG00000066392	Nrxn3	18191	9772.48	-0.145185	0.0404008	-3.59363	0.000326107	0.00616717
ENSMUSG00000071715	Ncf4	17972	48.0904	0.671751	0.186899	3.5942	0.000325388	0.00616717
ENSMUSG00000033184	Tmed7	66676	4666.59	-0.198249	0.0551787	-3.59285	0.000327078	0.00617294
ENSMUSG00000014932	Yes1	22612	648.045	-0.253636	0.0706223	-3.59144	0.000328854	0.00619396
ENSMUSG00000031264	Btk	12229	54.6611	0.452349	0.125946	3.5916	0.00032865	0.00619396
ENSMUSG00000038679	Trps1	83925	1524.63	-0.223316	0.0621906	-3.59083	0.000329621	0.00620218
ENSMUSG00000030516	Tjp1	21872	4007.3	-0.213624	0.0595227	-3.58894	0.000332022	0.00624108
ENSMUSG00000026843	Fubp3	320267	1640.12	-0.145282	0.0404941	-3.58773	0.000333575	0.00626397
ENSMUSG00000021546	Hnrnpk	15387	14362.2	-0.157713	0.0439692	-3.5869	0.000334636	0.00627761
ENSMUSG00000033400	Agl	77559	2158.66	-0.177501	0.0495	-3.58587	0.000335952	0.00629598
ENSMUSG00000044791	Setd2	235626	3262.64	-0.193863	0.0540824	-3.5846	0.0003376	0.00632055
ENSMUSG00000040720	Virma	66185	2002.82	-0.186149	0.0519591	-3.5826	0.000340196	0.00636278
ENSMUSG00000026828	Galnt5	241391	16.6605	-0.857927	0.239536	-3.58161	0.000341478	0.00637426
ENSMUSG00000034685	Fam171a2	217219	3107.91	0.275204	0.0768383	3.5816	0.000341491	0.00637426
ENSMUSG00000039913	Pak7	241656	2025.62	-0.289714	0.0808992	-3.58118	0.000342049	0.00637833
ENSMUSG00000037416	Dmxl1	240283	3364.06	-0.282861	0.0790059	-3.58025	0.000343269	0.00638835
ENSMUSG00000038594	Cep85l	100038725	312.75	-0.491256	0.137209	-3.58034	0.000343141	0.00638835
ENSMUSG00000034209	Rasl10a	75668	939.866	0.385661	0.107734	3.57976	0.000343916	0.00639403
ENSMUSG00000035696	Rnf38	73469	2684.66	-0.125776	0.0351406	-3.57922	0.000344625	0.00640086
ENSMUSG00000027770	Dhx36	72162	4100.33	-0.196281	0.0548441	-3.57889	0.000345051	0.00640241
ENSMUSG00000000838	Fmr1	14265	3459.73	-0.205416	0.0574084	-3.57815	0.00034603	0.00641424
ENSMUSG00000071350	Setdb2	239122	183.098	-0.26342	0.0736294	-3.57764	0.000346706	0.00642041
ENSMUSG00000029920	Smarcad1	13990	1136.92	-0.207068	0.0578826	-3.57738	0.000347052	0.00642046
ENSMUSG00000034912	Mdga2	320772	1689.56	-0.250963	0.0701638	-3.57681	0.000347806	0.00642806
ENSMUSG00000047036	Zfp445	235682	3701.36	-0.28204	0.0788798	-3.57557	0.000349471	0.00645246
ENSMUSG00000033964	Zbtb41	226470	1446.51	-0.23904	0.066869	-3.57475	0.000350559	0.0064598
ENSMUSG00000045613	Chrm2	243764	864.743	-0.334098	0.093457	-3.57489	0.000350381	0.0064598
ENSMUSG00000027784	Ppm1l	242083	8149.19	-0.297146	0.0831384	-3.57411	0.00035142	0.00646296
ENSMUSG00000037643	Prkci	18759	2645.6	-0.190434	0.0532797	-3.57423	0.000351257	0.00646296
ENSMUSG00000023367	Tmem176a	66058	577.063	0.341619	0.0955958	3.57358	0.000352132	0.00646968
ENSMUSG00000032239	Rp9	55934	974.505	0.213108	0.0596541	3.5724	0.000353727	0.00649262
ENSMUSG00000039680	Mrps6	121022	597.391	0.270699	0.0757878	3.5718	0.000354541	0.0065012
ENSMUSG00000051223	Bzw1	66882	6905.44	-0.224899	0.062988	-3.5705	0.000356305	0.00652715
ENSMUSG00000034854	Mfsd12	73822	993.301	0.178392	0.0499728	3.56977	0.000357291	0.00653242
ENSMUSG00000074466	Gm15417	545539	102.915	0.333829	0.0935142	3.56982	0.000357228	0.00653242
ENSMUSG00000032261	Sh3bgrl2	212531	1773.23	-0.232696	0.065215	-3.56813	0.000359534	0.00656702
ENSMUSG00000006740	Kif5b	16573	11126.5	-0.226546	0.0635048	-3.56738	0.000360564	0.00657803
ENSMUSG00000024085	Man2a1	17158	1112.59	-0.246303	0.0690518	-3.56693	0.000361191	0.00657803
ENSMUSG00000028698	Pik3r3	18710	2656.57	-0.18375	0.051513	-3.56705	0.00036102	0.00657803
ENSMUSG00000024614	Tmx3	67988	3279.2	-0.277358	0.0777855	-3.56567	0.000362929	0.00660326
ENSMUSG00000020708	Psmc5	19184	5765.13	0.194438	0.0545372	3.56523	0.000363538	0.00660792
ENSMUSG00000046269	Usp27x	54651	735.967	0.208899	0.0586726	3.56041	0.000370275	0.00672385
ENSMUSG00000020143	Dock2	94176	161.112	0.694643	0.195205	3.55852	0.00037295	0.00674911
ENSMUSG00000022387	Brd1	223770	2291.99	-0.146581	0.0411909	-3.55858	0.000372861	0.00674911
ENSMUSG00000035133	Arhgap5	11855	4086.91	-0.43401	0.121967	-3.55841	0.000373108	0.00674911
ENSMUSG00000056185	Snx32	225861	3274.18	0.171845	0.0482918	3.55848	0.000373007	0.00674911
ENSMUSG00000020311	Erlec1	66753	1864.52	-0.170585	0.0479605	-3.55677	0.000375438	0.0067847
ENSMUSG00000056966	Gjc3	118446	2187.47	-0.312157	0.0877861	-3.55588	0.000376713	0.00680118
ENSMUSG00000051232	Tmem199	195040	1376.1	0.172098	0.0484039	3.55545	0.000377328	0.00680572
ENSMUSG00000069601	Ank3	11735	17171.4	-0.252879	0.0711393	-3.55471	0.000378399	0.00681847
ENSMUSG00000021668	Polk	27015	470.159	-0.294465	0.0828602	-3.55376	0.000379771	0.00683662
ENSMUSG00000033981	Gria2	14800	27690.6	-0.251853	0.0709012	-3.55216	0.000382076	0.0068715
ENSMUSG00000039943	Plcb4	18798	3309.42	-0.243323	0.0685085	-3.55172	0.000382726	0.00687658
ENSMUSG00000036339	Tmem260	218989	848.136	-0.412591	0.116231	-3.54974	0.000385613	0.00691882
ENSMUSG00000040850	Psme4	103554	2856.2	-0.15475	0.0436026	-3.5491	0.000386555	0.00691882
ENSMUSG00000043372	Hexim2	71059	401.082	0.276312	0.0778461	3.54947	0.000386014	0.00691882
ENSMUSG00000085436	Zfp335os	629777	110.844	0.285843	0.0805359	3.54926	0.000386319	0.00691882
ENSMUSG00000021846	Peli2	93834	1031.19	-0.182187	0.051341	-3.54857	0.000387326	0.00692599
ENSMUSG00000001773	Folh1	53320	440.32	-0.744074	0.209757	-3.54731	0.000389186	0.00695262
ENSMUSG00000040618	Pck2	74551	1095.13	0.183812	0.0518381	3.54589	0.000391287	0.00697683
ENSMUSG00000051674	Dcun1d4	100737	5002.04	-0.147733	0.0416616	-3.54602	0.000391089	0.00697683
ENSMUSG00000026504	Sdccag8	76816	1190.7	0.131165	0.0370011	3.54491	0.000392746	0.00699619
ENSMUSG00000020024	Cep83	77048	1351.15	-0.176215	0.0497246	-3.54382	0.00039437	0.00700791
ENSMUSG00000024120	Lrpprc	72416	3161.03	-0.194621	0.0549199	-3.54372	0.000394527	0.00700791
ENSMUSG00000044676	Zfp612	234725	1161.11	-0.277108	0.0781874	-3.54415	0.000393876	0.00700791
ENSMUSG00000035770	Dync1li2	234663	13390.7	-0.122655	0.0346149	-3.54343	0.000394955	0.00700886
ENSMUSG00000038371	Sbf2	319934	2612	-0.16179	0.0456686	-3.5427	0.000396056	0.00702175
ENSMUSG00000030495	Slc7a10	53896	849.074	-0.246348	0.0695523	-3.5419	0.000397254	0.00703631
ENSMUSG00000001909	Trmt1	212528	3033.25	0.194659	0.054975	3.54087	0.000398814	0.00705728
ENSMUSG00000024118	Tedc2	72016	330.11	0.185829	0.0525157	3.53855	0.000402338	0.00711291
ENSMUSG00000044308	Ubr3	68795	9884.96	-0.231368	0.0653905	-3.53825	0.000402792	0.00711422
ENSMUSG00000027774	Gfm1	28030	1795.54	-0.178533	0.0504671	-3.53761	0.000403768	0.00712474
ENSMUSG00000089730	1700007P06Rik	69308	17.3427	-0.803252	0.227109	-3.53685	0.000404929	0.00713849
ENSMUSG00000026235	Epha4	13838	7585.91	-0.245486	0.0694309	-3.53569	0.000406705	0.00716307
ENSMUSG00000055676	Gm5069	277333	166.77	0.347467	0.0983196	3.53405	0.000409238	0.0072009
ENSMUSG00000020580	Rock2	19878	9170.32	-0.290138	0.0821064	-3.53368	0.00040982	0.00720436
ENSMUSG00000020315	Sptbn1	20742	42961.5	-0.210542	0.0596115	-3.5319	0.00041258	0.00724609
ENSMUSG00000034317	Trim59	66949	743.987	-0.46838	0.132634	-3.53138	0.000413398	0.00725364
ENSMUSG00000063849	Ppcdc	66812	542.197	0.159698	0.0452484	3.52937	0.000416554	0.00729535
ENSMUSG00000084106	Gm6136	620213	2273.92	0.200982	0.0569448	3.52941	0.000416485	0.00729535
ENSMUSG00000037475	Thoc2	331401	2516.39	-0.265902	0.0753595	-3.52844	0.00041801	0.00730718
ENSMUSG00000070343	Gm10288	100040540	3832.82	0.397901	0.112789	3.52784	0.000418967	0.00731707
ENSMUSG00000029915	Clec5a	23845	82.1633	0.481022	0.136422	3.52599	0.00042191	0.00736159
ENSMUSG00000083621	Gm14586	100041925	21.2641	0.808131	0.229256	3.52502	0.000423459	0.00737487
ENSMUSG00000024044	Epb41l3	13823	8841.68	-0.159241	0.0451857	-3.52415	0.000424843	0.0073921
ENSMUSG00000000600	Krit1	79264	2012.6	-0.193136	0.0548174	-3.52327	0.000426259	0.00739923
ENSMUSG00000001280	Sp1	20683	1342.19	-0.218269	0.0619527	-3.52316	0.000426438	0.00739923
ENSMUSG00000066705	Fxyd6	59095	4707.78	0.284223	0.0806698	3.52329	0.000426218	0.00739923
ENSMUSG00000025218	Poll	56626	450.974	0.263469	0.0748332	3.52075	0.000430331	0.00745987
ENSMUSG00000024780	Cdc37l1	67072	2540.65	-0.242031	0.0687716	-3.51935	0.00043261	0.00749244
ENSMUSG00000052504	Epha3	13837	413.259	-0.297377	0.0845319	-3.51793	0.000434925	0.00752558
ENSMUSG00000085181	Gm12709	100504717	191.42	0.433043	0.123121	3.51723	0.000436074	0.00753849
ENSMUSG00000044042	Fmn1	14260	1093.03	-0.407253	0.11584	-3.51565	0.000438686	0.00757665
ENSMUSG00000047676	Rpsa-ps10	100040633	2073.5	0.351703	0.100062	3.51484	0.000440027	0.0075928
ENSMUSG00000013539	Tango2	27883	3170.02	0.178016	0.0506555	3.51424	0.000441013	0.00760281
ENSMUSG00000041408	Wapl	218914	2525.46	-0.200782	0.0571471	-3.51343	0.00044236	0.00761201
ENSMUSG00000051747	Ttn	22138	177.702	-0.558149	0.158858	-3.51351	0.000442228	0.00761201
ENSMUSG00000022270	Retreg1	66270	1995.09	-0.171779	0.048897	-3.51307	0.000442954	0.00761523
ENSMUSG00000041571	Selenow	20364	15379.7	0.312879	0.0890734	3.51259	0.000443756	0.00762202
ENSMUSG00000024072	Yipf4	67864	1873.7	-0.183411	0.0522225	-3.51211	0.000444558	0.0076288
ENSMUSG00000024908	Ppp6r3	52036	3543.31	-0.0885718	0.0252505	-3.50772	0.000451966	0.00774882
ENSMUSG00000019951	Uhrf1bp1l	75089	3974.46	-0.183747	0.0523879	-3.50744	0.000452449	0.00774999
ENSMUSG00000031388	Naa10	56292	508.601	0.271266	0.0773687	3.50614	0.000454655	0.00777356
ENSMUSG00000028343	Erp44	76299	1228.63	-0.157521	0.0449342	-3.50559	0.000455602	0.00778264
ENSMUSG00000043733	Ptpn11	19247	8265.88	-0.135884	0.0387689	-3.50498	0.000456647	0.00779339
ENSMUSG00000029999	Tgfa	21802	1481.49	-0.325937	0.0930125	-3.50423	0.000457924	0.00780806
ENSMUSG00000002413	Braf	109880	6037.66	-0.213706	0.0609908	-3.5039	0.000458503	0.00781083
ENSMUSG00000025597	Klhl4	237010	726.116	-0.2855	0.0814956	-3.50325	0.00045961	0.00782257
ENSMUSG00000014905	Dnajb9	27362	1851.36	-0.176821	0.0504971	-3.50161	0.000462455	0.00786384
ENSMUSG00000022425	Enpp2	18606	10344.5	-0.496702	0.141883	-3.5008	0.000463871	0.00788075
ENSMUSG00000020272	Stk10	20868	449.475	0.253416	0.0723992	3.50026	0.000464809	0.00788239
ENSMUSG00000032305	Fam219b	78323	953.863	0.137948	0.0394098	3.50036	0.000464631	0.00788239
ENSMUSG00000031441	Atp11a	50770	3433.42	-0.199526	0.0570135	-3.49962	0.000465921	0.00788695
ENSMUSG00000010608	Rbm25	67039	6434.56	-0.184592	0.0527777	-3.49753	0.000469579	0.00792738
ENSMUSG00000014232	Cluap1	76779	538.023	0.22079	0.063124	3.49772	0.000469251	0.00792738
ENSMUSG00000024491	Rbm27	225432	1788.38	-0.16726	0.0478171	-3.49791	0.000468921	0.00792738
ENSMUSG00000000125	Wnt3	22415	161.694	-0.477349	0.136555	-3.49565	0.000472901	0.00795477
ENSMUSG00000004730	Adgre1	13733	255.278	0.473605	0.135479	3.49579	0.000472662	0.00795477
ENSMUSG00000027109	Sp3	20687	2078.82	-0.217968	0.0623528	-3.49572	0.00047278	0.00795477
ENSMUSG00000050777	Tmem37	170706	47.4639	0.490338	0.140257	3.49601	0.000472277	0.00795477
ENSMUSG00000014873	Surf2	20931	940.276	0.17531	0.050182	3.49349	0.000476754	0.00795525
ENSMUSG00000021427	Ssr1	107513	7257.4	-0.15641	0.0447572	-3.49464	0.000474709	0.00795525
ENSMUSG00000021504	B4galt7	218271	926.008	0.189653	0.0542804	3.49395	0.000475939	0.00795525
ENSMUSG00000025147	Mob2	101513	973.903	0.220418	0.0630821	3.49414	0.000475589	0.00795525
ENSMUSG00000028184	Adgrl2	99633	3330.33	-0.233051	0.0667074	-3.49363	0.000476503	0.00795525
ENSMUSG00000031990	Jam3	83964	1485.03	-0.130332	0.0373034	-3.49383	0.000476142	0.00795525
ENSMUSG00000033624	Pdpr	319518	1176.5	-0.289453	0.082819	-3.495	0.000474054	0.00795525
ENSMUSG00000089911	Mfsd14a	15247	2291.99	-0.185827	0.0531872	-3.49383	0.000476139	0.00795525
ENSMUSG00000090610	Gm3571	100041907	189.609	0.358473	0.102604	3.49376	0.00047627	0.00795525
ENSMUSG00000055240	Zfp101	22643	524.284	-0.234039	0.067003	-3.49296	0.00047769	0.00796377
ENSMUSG00000029832	Nfe2l3	18025	243.76	-0.321951	0.0921801	-3.49263	0.000478283	0.00796657
ENSMUSG00000062997	Rpl35	66489	706.319	0.431683	0.123619	3.49203	0.00047936	0.00797741
ENSMUSG00000032333	Stoml1	69106	2292.64	0.213956	0.0612779	3.49158	0.000480178	0.00798391
ENSMUSG00000026576	Atp1b1	11931	42542.6	-0.224812	0.0643981	-3.49097	0.000481266	0.0079949
ENSMUSG00000041915	Ammecr1l	225339	1123.9	-0.109161	0.0312911	-3.48858	0.000485594	0.00805966
ENSMUSG00000032089	Il10ra	16154	266.572	0.281679	0.0807764	3.48715	0.000488203	0.00808861
ENSMUSG00000061286	Exosc5	27998	390.384	0.261294	0.0749304	3.48715	0.000488192	0.00808861
ENSMUSG00000016150	Tenm1	23963	2041.24	-0.366168	0.105033	-3.48622	0.00048989	0.00809793
ENSMUSG00000021843	Ktn1	16709	4398.16	-0.17098	0.0490438	-3.48626	0.000489817	0.00809793
ENSMUSG00000032125	Robo4	74144	181.557	-0.534809	0.153411	-3.48613	0.000490063	0.00809793
ENSMUSG00000025245	Lztfl1	93730	2074.19	-0.212237	0.0609034	-3.48481	0.000492482	0.00813073
ENSMUSG00000015112	Slc25a13	50799	165.525	-0.313192	0.0898876	-3.48426	0.000493502	0.00814039
ENSMUSG00000073131	Vma21	67048	2560.95	-0.215819	0.0619706	-3.4826	0.000496578	0.00818392
ENSMUSG00000021000	Mia2	338320	2203.12	-0.14547	0.0417796	-3.48184	0.000497974	0.00819868
ENSMUSG00000029636	Wasf3	245880	3975.12	-0.202257	0.0580962	-3.48141	0.000498787	0.00819868
ENSMUSG00000044876	Zfp444	72667	1183.02	0.239134	0.0686867	3.48152	0.000498575	0.00819868
ENSMUSG00000019907	Ppp1r12a	17931	2586.14	-0.295435	0.0849277	-3.47867	0.000503908	0.00826833
ENSMUSG00000050299	Gm9843	100039316	5605.62	0.343663	0.0987907	3.4787	0.000503853	0.00826833
ENSMUSG00000028132	Tmem56	99887	3020.18	-0.308436	0.0886778	-3.47817	0.000504851	0.00827089
ENSMUSG00000032462	Pik3cb	74769	1384.72	-0.159988	0.0459984	-3.47812	0.000504948	0.00827089
ENSMUSG00000022372	Sla	20491	351.863	0.228055	0.0655883	3.47707	0.000506917	0.00829589
ENSMUSG00000052713	Zfp608	269023	994.527	-0.199444	0.0573647	-3.47677	0.000507501	0.0082982
ENSMUSG00000021180	Rps6ka5	73086	1056.88	-0.283061	0.0814537	-3.47512	0.000510622	0.00833466
ENSMUSG00000031292	Cdkl5	382253	1768.07	-0.548351	0.157793	-3.47512	0.000510616	0.00833466
ENSMUSG00000002658	Gtf2f1	98053	2457.27	0.215091	0.0619082	3.47435	0.000512087	0.00835129
ENSMUSG00000051439	Cd14	12475	110.968	0.775168	0.223149	3.47377	0.000513204	0.00836223
ENSMUSG00000036580	Spg20	229285	1784.94	-0.167397	0.0482042	-3.47266	0.00051532	0.00838311
ENSMUSG00000041560	Nop53	68077	2501.67	0.228876	0.065913	3.4724	0.000515828	0.00838311
ENSMUSG00000051007	Gatd1	213350	1113.36	0.182408	0.0525302	3.47244	0.000515748	0.00838311
ENSMUSG00000037966	Ninj1	18081	534.532	0.332973	0.0959097	3.47173	0.000517118	0.00839678
ENSMUSG00000024211	Grm8	14823	594.249	-0.274861	0.0791839	-3.47117	0.000518196	0.00840498
ENSMUSG00000034664	Itga2b	16399	177.98	0.358679	0.103336	3.471	0.000518521	0.00840498
ENSMUSG00000027408	Cpxm1	56264	298.542	0.284612	0.0820091	3.47049	0.000519511	0.00840647
ENSMUSG00000067189	Gm7335	654468	836.235	-0.468318	0.134937	-3.47063	0.000519234	0.00840647
ENSMUSG00000028003	Lrat	79235	14.8346	-0.795418	0.229226	-3.47002	0.000520426	0.00841401
ENSMUSG00000032186	Tmod2	50876	21733.3	-0.219426	0.0632578	-3.46876	0.00052286	0.00844607
ENSMUSG00000026950	Neb	17996	148.284	-0.426339	0.122972	-3.46697	0.000526361	0.00849529
ENSMUSG00000036570	Fxyd1	56188	898.423	0.342092	0.0986793	3.46671	0.000526876	0.00849627
ENSMUSG00000035456	Prdm8	77630	939.216	0.239659	0.0691408	3.46624	0.000527785	0.0084963
ENSMUSG00000075478	Slitrk1	76965	3043.6	-0.297476	0.0858199	-3.46628	0.000527704	0.0084963
ENSMUSG00000008730	Hipk1	15257	6082.46	-0.147286	0.042519	-3.46401	0.000532188	0.00854635
ENSMUSG00000053175	Bcl3	12051	31.965	0.892096	0.25752	3.46419	0.000531839	0.00854635
ENSMUSG00000067071	Hes6	55927	544.699	0.332722	0.0960523	3.46397	0.000532264	0.00854635
ENSMUSG00000056854	Pou3f4	18994	315.424	-0.275018	0.0794141	-3.46308	0.000534027	0.00856731
ENSMUSG00000003680	Taf6l	225895	679.895	0.171118	0.0494282	3.46196	0.000536262	0.00858845
ENSMUSG00000020573	Pik3cg	30955	151.745	0.341136	0.0985357	3.46205	0.000536078	0.00858845
ENSMUSG00000015942	Gtf2ird2	114674	820.268	0.137752	0.0397938	3.46165	0.000536882	0.00859103
ENSMUSG00000006705	Pknox1	18771	620.579	-0.161759	0.0467333	-3.46131	0.000537545	0.0085943
ENSMUSG00000053510	Nrd1	230598	6440.31	-0.0986051	0.0284948	-3.46046	0.000539244	0.00861411
ENSMUSG00000046719	Nxph3	104079	1078.56	0.307866	0.0889872	3.45966	0.000540855	0.00863248
ENSMUSG00000026456	Cyb5r1	72017	868.914	0.245548	0.0709846	3.45918	0.000541823	0.0086332
ENSMUSG00000033237	Arid2	77044	1965.32	-0.172082	0.0497434	-3.45939	0.000541394	0.0086332
ENSMUSG00000022575	Gsdmd	69146	119.508	0.375241	0.108487	3.45887	0.000542453	0.00863589
ENSMUSG00000040928	S100pbp	74648	2186.21	-0.13123	0.037948	-3.45815	0.000543908	0.00864435
ENSMUSG00000068882	Ssb	20823	3138.85	-0.21401	0.0618857	-3.45815	0.000543897	0.00864435
ENSMUSG00000015501	Hivep2	15273	10545.3	-0.236632	0.068438	-3.45761	0.000544994	0.00864817
ENSMUSG00000044788	Fads6	328035	1672.05	-0.2142	0.0619511	-3.45757	0.000545072	0.00864817
ENSMUSG00000027598	Itch	16396	2943.36	-0.206929	0.0598739	-3.45608	0.000548097	0.0086859
ENSMUSG00000028954	Nub1	53312	2590.09	0.169697	0.0491031	3.45594	0.000548378	0.0086859
ENSMUSG00000021047	Nova1	664883	3332.21	-0.183065	0.0529754	-3.45567	0.000548937	0.0086874
ENSMUSG00000018012	Rac3	170758	814.702	0.305941	0.0885649	3.45442	0.000551472	0.00872015
ENSMUSG00000043614	Vps37d	194309	769.909	0.26617	0.0770662	3.45379	0.000552776	0.0087334
ENSMUSG00000033278	Ptprm	19274	1643.6	-0.227215	0.0658155	-3.4523	0.000555825	0.00876677
ENSMUSG00000029223	Uchl1	22223	16604.4	0.284201	0.0823543	3.45095	0.000558617	0.00880338
ENSMUSG00000040732	Erg	13876	124.579	-0.41687	0.120875	-3.44878	0.000563122	0.00886692
ENSMUSG00000029108	Pcdh7	54216	5807.42	-0.230902	0.0669865	-3.44699	0.000566861	0.0089183
ENSMUSG00000004895	Prcc	94315	1579.76	0.221497	0.0642962	3.44494	0.000571177	0.00896592
ENSMUSG00000026781	Acbd5	74159	3633.37	-0.174289	0.0505936	-3.44487	0.000571325	0.00896592
ENSMUSG00000053040	Aph1c	68318	424.692	-0.192018	0.055739	-3.44495	0.000571168	0.00896592
ENSMUSG00000031438	Rnf128	66889	803.138	-0.184229	0.0534898	-3.44419	0.000572783	0.00896676
ENSMUSG00000037808	Fam76b	72826	1127.4	-0.214428	0.0622574	-3.44421	0.000572731	0.00896676
ENSMUSG00000038174	Fam126b	213056	5394.07	-0.316701	0.0919528	-3.44417	0.000572815	0.00896676
ENSMUSG00000020130	Tbc1d15	66687	1530.05	-0.201203	0.0584328	-3.44332	0.000574615	0.0089772
ENSMUSG00000036278	Macrod1	107227	359.852	0.263319	0.0764695	3.44345	0.00057435	0.0089772
ENSMUSG00000037652	Phc3	241915	3780.82	-0.2123	0.0616581	-3.44318	0.000574921	0.0089772
ENSMUSG00000024370	Cdc23	52563	1635.57	-0.127783	0.0371357	-3.44097	0.000579625	0.00903559
ENSMUSG00000041258	Zfp236	329002	2413.66	-0.160033	0.0465134	-3.44058	0.000580477	0.00904134
ENSMUSG00000024576	Csnk1a1	93687	11302.7	-0.149701	0.0435151	-3.4402	0.000581288	0.00904644
ENSMUSG00000028381	Ugcg	22234	3451.05	-0.164639	0.0478691	-3.43937	0.000583077	0.00905922
ENSMUSG00000034612	Chst11	58250	2519.25	-0.158562	0.0460992	-3.43957	0.000582629	0.00905922
ENSMUSG00000034893	Cog3	338337	1551.67	-0.110562	0.0321508	-3.43886	0.000584174	0.00906123
ENSMUSG00000062151	Unc13c	208898	2741.34	-0.371182	0.107937	-3.43889	0.000584105	0.00906123
ENSMUSG00000076437	Selenoh	72657	501.615	0.290523	0.0845048	3.43794	0.000586158	0.00908447
ENSMUSG00000024170	Telo2	71718	1335.25	0.190833	0.0555126	3.43764	0.000586803	0.00908695
ENSMUSG00000071489	Ptgdr	19214	49.9289	0.652705	0.189884	3.43739	0.000587356	0.009088
ENSMUSG00000040699	Limd2	67803	2277.48	0.270943	0.0788294	3.43708	0.00058803	0.00909091
ENSMUSG00000006576	Slc4a3	20536	8925.15	0.206872	0.0602151	3.43554	0.00059137	0.00911996
ENSMUSG00000060002	Chpt1	212862	2349.82	-0.290564	0.084573	-3.43567	0.0005911	0.00911996
ENSMUSG00000038084	Opa1	74143	7166.09	-0.192749	0.0561345	-3.43371	0.000595387	0.00917435
ENSMUSG00000048376	F2r	14062	332.832	-0.339078	0.0987589	-3.43339	0.00059608	0.00917747
ENSMUSG00000026159	Agfg1	15463	4607.64	-0.159185	0.0463678	-3.43309	0.000596749	0.00918022
ENSMUSG00000032883	Acsl3	74205	6464.5	-0.186435	0.0543105	-3.43276	0.000597478	0.00918389
ENSMUSG00000087056	Gm14004	100043375	91.5129	0.334133	0.0973548	3.43211	0.0005989	0.0091982
ENSMUSG00000032407	U2surp	67958	3749.79	-0.200032	0.0582871	-3.43185	0.000599477	0.00919952
ENSMUSG00000020437	Myo1g	246177	34.5241	0.616816	0.179755	3.43143	0.000600397	0.00920609
ENSMUSG00000060802	B2m	12010	2806.6	0.424516	0.123749	3.43046	0.000602562	0.00923172
ENSMUSG00000028443	Nudt2	66401	537.095	0.233444	0.0681181	3.42705	0.000610176	0.00934073
ENSMUSG00000022961	Son	20658	15469.9	-0.187989	0.0548635	-3.42649	0.000611434	0.00935234
ENSMUSG00000025862	Stag2	20843	2923.62	-0.264722	0.0773065	-3.42432	0.000616351	0.009386
ENSMUSG00000027827	Kcnab1	16497	4204.71	-0.249233	0.0727754	-3.42469	0.00061549	0.009386
ENSMUSG00000031703	Itfg1	71927	9062.5	-0.220178	0.0642975	-3.42437	0.000616224	0.009386
ENSMUSG00000042473	Tbc1d8b	245638	288.612	-0.413027	0.120613	-3.4244	0.00061617	0.009386
ENSMUSG00000069769	Msi2	76626	5846.05	-0.234618	0.068518	-3.42419	0.000616643	0.009386
ENSMUSG00000066415	Msl2	77853	2603.64	-0.118993	0.0347637	-3.4229	0.000619565	0.00941518
ENSMUSG00000068732	Tmem167b	67495	1985.74	-0.117148	0.0342239	-3.42299	0.000619359	0.00941518
ENSMUSG00000036427	Gpi1	14751	20652.8	0.234572	0.068541	3.42237	0.000620783	0.00942604
ENSMUSG00000021733	Slc4a7	218756	1393.59	-0.245956	0.0719026	-3.42069	0.000624628	0.00946139
ENSMUSG00000030842	Lamtor1	66508	2017.39	0.261144	0.0763398	3.4208	0.000624362	0.00946139
ENSMUSG00000033983	Coil	12812	268.854	0.24992	0.073053	3.42107	0.000623754	0.00946139
ENSMUSG00000024900	Cpt1a	12894	986.765	-0.213065	0.0623025	-3.41985	0.000626551	0.00948286
ENSMUSG00000078193	Gm2000	100038991	1822.18	0.398117	0.116425	3.41952	0.000627328	0.00948694
ENSMUSG00000019966	Kitl	17311	2428.52	-0.243085	0.0711331	-3.41732	0.000632402	0.00955595
ENSMUSG00000055884	Fancm	104806	634.742	-0.232944	0.0681789	-3.41666	0.000633942	0.00957151
ENSMUSG00000021702	Thbs4	21828	177.986	-0.699873	0.204883	-3.41596	0.00063557	0.00958519
ENSMUSG00000035168	Tanc1	66860	1995.29	-0.274029	0.0802231	-3.41583	0.000635873	0.00958519
ENSMUSG00000003283	Hck	15162	93.6775	0.407058	0.119189	3.41524	0.000637268	0.0095985
ENSMUSG00000028961	Pgd	110208	1560.08	0.134037	0.0392581	3.41424	0.000639607	0.00962598
ENSMUSG00000050332	Amer1	72345	461.329	-0.221413	0.0648609	-3.41366	0.000640961	0.00963861
ENSMUSG00000029426	Scarb2	12492	2571.98	-0.321239	0.0941702	-3.41126	0.00064663	0.00971145
ENSMUSG00000056529	Ptafr	19204	88.3163	0.434413	0.12735	3.41117	0.000646842	0.00971145
ENSMUSG00000051735	Rinl	320435	91.7189	0.313703	0.0920026	3.40971	0.000650309	0.00974786
ENSMUSG00000021614	Vcan	13003	823.592	-0.340484	0.0999034	-3.40813	0.00065409	0.00979507
ENSMUSG00000069184	Zfp72	238722	141.958	-0.342394	0.100474	-3.40778	0.000654935	0.00979507
ENSMUSG00000079523	Tmsb10	19240	3377.95	0.281674	0.0826572	3.40774	0.000655027	0.00979507
ENSMUSG00000021706	Zfyve16	218441	1014.78	-0.227706	0.0668342	-3.40704	0.000656722	0.00980475
ENSMUSG00000033423	Eri3	140546	4189.69	0.176133	0.0516961	3.40709	0.000656599	0.00980475
ENSMUSG00000035258	Abi3bp	320712	554.463	-0.40169	0.117913	-3.40667	0.0006576	0.00980973
ENSMUSG00000027433	Xrn2	24128	2020.88	-0.275467	0.0808784	-3.40594	0.000659366	0.00982072
ENSMUSG00000032030	Cul5	75717	2955.25	-0.175271	0.0514754	-3.40495	0.000661752	0.00984842
ENSMUSG00000001289	Pfdn5	56612	4387.8	0.261477	0.0768312	3.40327	0.000665852	0.0098753
ENSMUSG00000022179	4931414P19Rik	74359	156.988	0.315454	0.0926908	3.4033	0.000665779	0.0098753
ENSMUSG00000024143	Rhoq	104215	1764.51	-0.177991	0.0522925	-3.40375	0.000664664	0.0098753
ENSMUSG00000025468	Caly	68566	4840.76	0.217284	0.063837	3.40373	0.000664715	0.0098753
ENSMUSG00000069539	Scyl2	213326	1705.81	-0.176158	0.0517637	-3.40313	0.000666195	0.0098753
ENSMUSG00000020486	2021-09-04	18952	6953.23	-0.21156	0.0621786	-3.40246	0.000667822	0.00989158
ENSMUSG00000026980	Ly75	17076	53.6541	-0.552309	0.162375	-3.40145	0.000670304	0.00990484
ENSMUSG00000040167	Ikzf5	67143	1273.82	-0.148412	0.0436277	-3.40179	0.000669461	0.00990484
ENSMUSG00000041959	S100a10	20194	647.513	0.401826	0.118129	3.40159	0.000669943	0.00990484
ENSMUSG00000037062	Sh3glb1	54673	2256.92	-0.212991	0.0626289	-3.40084	0.00067179	0.00991623
ENSMUSG00000071176	Arhgef10	234094	1913.96	-0.274173	0.0806224	-3.4007	0.000672134	0.00991623
ENSMUSG00000021676	Iqgap2	544963	1205.24	-0.359119	0.105632	-3.39971	0.000674563	0.00992079
ENSMUSG00000027173	Depdc7	211896	68.3265	-0.405464	0.119262	-3.39976	0.000674447	0.00992079
ENSMUSG00000035517	Tdrd7	100121	1598.92	-0.155635	0.0457751	-3.4	0.000673857	0.00992079
ENSMUSG00000039623	Ap5z1	231855	1077.85	0.209705	0.0616742	3.40021	0.000673346	0.00992079
ENSMUSG00000070443	Gm10291	100041748	1209.87	0.35278	0.103784	3.39917	0.000675895	0.00993258
ENSMUSG00000022016	Akap11	219181	12344.4	-0.250582	0.0737375	-3.3983	0.000678063	0.00994603
ENSMUSG00000030921	Trim30a	20128	133.949	0.513919	0.151221	3.39846	0.000677652	0.00994603
ENSMUSG00000056124	B4galt6	56386	6751.28	-0.144282	0.0424615	-3.39795	0.000678936	0.00994603
ENSMUSG00000062866	Phactr2	215789	1543.33	-0.203765	0.0599648	-3.39808	0.000678608	0.00994603
ENSMUSG00000022901	Cd86	12524	101.047	0.416055	0.122465	3.39733	0.00068047	0.00996072
ENSMUSG00000041685	Fcho2	218503	2091.67	-0.204008	0.0600558	-3.39697	0.000681362	0.00996598
ENSMUSG00000032393	Dpp8	74388	7146.94	-0.2612	0.0769126	-3.39606	0.000683634	0.00998536
ENSMUSG00000047694	Yipf6	77929	1994.56	-0.171229	0.0504206	-3.39601	0.000683753	0.00998536
ENSMUSG00000000902	Smarcb1	20587	2528.19	0.146972	0.0432807	3.39579	0.000684312	0.00998573
ENSMUSG00000020132	Rab21	216344	2195.66	-0.149192	0.043946	-3.3949	0.000686541	0.0100105
ENSMUSG00000035847	Ids	15931	22301.9	-0.197126	0.0580772	-3.3942	0.000688296	0.0100282
ENSMUSG00000032913	Lrig2	269473	1945.93	-0.138203	0.0407211	-3.39389	0.000689078	0.0100318
ENSMUSG00000021939	Ctsb	13030	23017.9	0.187064	0.0551257	3.39341	0.000690291	0.0100339
ENSMUSG00000026565	Pou2f1	18986	1137.44	-0.269155	0.0793169	-3.39341	0.00069029	0.0100339
ENSMUSG00000092417	Gpank1	81845	339.929	0.270394	0.0797191	3.39183	0.000694266	0.010076
ENSMUSG00000027778	Ift80	68259	1308.38	-0.188865	0.0556982	-3.39086	0.000696726	0.0100805
ENSMUSG00000038212	Mfsd14b	66631	2183.81	-0.234087	0.0690341	-3.39088	0.000696676	0.0100805
ENSMUSG00000039252	Lgi2	246316	907.721	-0.345499	0.101883	-3.39115	0.000696006	0.0100805
ENSMUSG00000075703	Selenoi	28042	3066.04	-0.206815	0.0609915	-3.39088	0.000696674	0.0100805
ENSMUSG00000073771	Btbd19	78611	316.888	0.173479	0.0511681	3.39037	0.000697984	0.0100909
ENSMUSG00000003970	Rpl8	26961	8467.75	0.259843	0.0766615	3.38949	0.00070024	0.0101079
ENSMUSG00000071424	Grid2	14804	641.375	-0.26299	0.0775872	-3.38961	0.000699927	0.0101079
ENSMUSG00000022577	Ly6h	23934	6888.22	0.303048	0.0894303	3.38865	0.000702378	0.0101309
ENSMUSG00000032410	Xrn1	24127	2185.55	-0.204705	0.0604563	-3.386	0.000709188	0.0102158
ENSMUSG00000052406	Rexo4	227656	2168.65	0.147036	0.0434255	3.38594	0.000709356	0.0102158
ENSMUSG00000005447	Pafah1b3	18476	401.256	0.295478	0.0872995	3.38464	0.000712705	0.0102404
ENSMUSG00000021704	Mtx3	382793	2868.78	-0.184186	0.0544179	-3.38466	0.00071266	0.0102404
ENSMUSG00000035863	Palm	18483	7269.19	0.240693	0.0711054	3.38502	0.000711738	0.0102404
ENSMUSG00000017831	Rab5a	271457	3835.49	-0.199977	0.0590991	-3.38376	0.000715002	0.0102586
ENSMUSG00000021156	Zmynd11	66505	8720.22	-0.0867669	0.0256423	-3.38374	0.000715069	0.0102586
ENSMUSG00000029084	Cd38	12494	180.635	-0.421703	0.124664	-3.38271	0.000717738	0.0102812
ENSMUSG00000098154	Gm5787	544878	174.128	0.39629	0.117146	3.38289	0.000717284	0.0102812
ENSMUSG00000046699	Slitrk4	245446	2351.37	-0.293177	0.0866916	-3.38184	0.000720032	0.0103061
ENSMUSG00000034224	Slc38a8	234788	14.4347	-0.6634	0.196242	-3.38053	0.000723463	0.0103473
ENSMUSG00000020128	Vps54	245944	1693.35	-0.127204	0.037639	-3.37957	0.000726	0.0103757
ENSMUSG00000021962	Dcp1a	75901	1132.54	-0.122918	0.0363737	-3.37931	0.000726682	0.0103775
ENSMUSG00000034723	Tmx4	52837	12659.5	-0.18232	0.0539648	-3.3785	0.000728836	0.0104004
ENSMUSG00000040952	Rps19	20085	3743.64	0.306488	0.0907513	3.37724	0.000732181	0.0104401
ENSMUSG00000059495	Arhgef12	69632	13161.7	-0.176169	0.0521689	-3.3769	0.000733087	0.0104451
ENSMUSG00000047459	Dynlrb1	67068	3380.77	0.251947	0.0746222	3.3763	0.000734682	0.0104519
ENSMUSG00000022204	Ngdn	68966	640.411	0.266867	0.0790464	3.37608	0.000735273	0.0104524
ENSMUSG00000038056	Kmt2c	231051	5114.11	-0.24742	0.0732988	-3.3755	0.000736811	0.0104584
ENSMUSG00000053007	Creb5	231991	113.066	-0.503096	0.149041	-3.37555	0.000736675	0.0104584
ENSMUSG00000084013	Gm14270	20461	672.937	0.262964	0.0779239	3.37463	0.000739161	0.0104838
ENSMUSG00000046280	She	214547	147.215	-0.444132	0.131619	-3.37437	0.000739858	0.0104857
ENSMUSG00000033249	Hsf4	26386	768.749	0.24627	0.0730002	3.37355	0.000742061	0.010509
ENSMUSG00000059857	Ntng1	80883	2061.03	-0.267622	0.079339	-3.37314	0.00074316	0.0105166
ENSMUSG00000018481	Appbp2	66884	4566.36	-0.188508	0.0558979	-3.37236	0.00074526	0.0105383
ENSMUSG00000015970	Chdh	218865	297.472	-0.38392	0.113886	-3.37108	0.000748728	0.0105714
ENSMUSG00000038665	Dgki	320127	1522.59	-0.315194	0.0934993	-3.37108	0.000748729	0.0105714
ENSMUSG00000062963	Ufc1	66155	2043.39	0.219667	0.0651702	3.37067	0.000749853	0.0105793
ENSMUSG00000060992	Copz1	56447	3151	0.181761	0.0539628	3.36826	0.000756433	0.0106641
ENSMUSG00000039013	Siglecf	233186	31.9048	0.780446	0.231736	3.36783	0.000757623	0.0106728
ENSMUSG00000036503	Rnf13	24017	4557.85	-0.230236	0.0683762	-3.3672	0.00075936	0.0106893
ENSMUSG00000025880	Smad7	17131	1197.99	-0.186615	0.0554331	-3.3665	0.000761293	0.0107084
ENSMUSG00000020690	Efcab3	70894	30.0246	0.494365	0.146873	3.36594	0.00076282	0.0107219
ENSMUSG00000022710	Usp7	252870	6696.56	-0.125462	0.0372767	-3.3657	0.000763506	0.0107234
ENSMUSG00000026516	Nvl	67459	3329.1	-0.165722	0.0492458	-3.3652	0.000764874	0.0107346
ENSMUSG00000022760	Thap7	69009	582.064	0.249856	0.074264	3.36443	0.000767028	0.0107568
ENSMUSG00000090121	Abhd12b	100504285	114.882	-0.917911	0.272907	-3.36345	0.000769736	0.0107867
ENSMUSG00000035236	Scai	320271	3835.82	-0.287407	0.0854688	-3.36272	0.0007718	0.0108075
ENSMUSG00000016200	Syt14	329324	1142.77	-0.230485	0.0685982	-3.35993	0.000779615	0.0108925
ENSMUSG00000020458	Rtn4	68585	25303.2	-0.177559	0.0528439	-3.36008	0.000779207	0.0108925
ENSMUSG00000103088	Pcdhgb6	93703	340.653	-0.367636	0.109409	-3.36021	0.000778822	0.0108925
ENSMUSG00000038732	Mboat1	218121	145.184	-0.42874	0.127652	-3.35867	0.000783177	0.0109341
ENSMUSG00000028899	Taf12	66464	609.806	0.151579	0.0451354	3.35832	0.000784181	0.0109388
ENSMUSG00000037994	Slc9b2	97086	182.938	0.241404	0.071886	3.35814	0.000784679	0.0109388
ENSMUSG00000018882	Mrpl45	67036	1279.34	0.170119	0.0506682	3.35751	0.000786492	0.0109526
ENSMUSG00000027316	Gfra4	14588	1583.15	0.293138	0.0873231	3.35694	0.000788112	0.0109526
ENSMUSG00000037601	Nme1	18102	1705.25	0.337367	0.10051	3.35656	0.000789178	0.0109526
ENSMUSG00000047193	Dync2h1	110350	2103.2	-0.270514	0.0805797	-3.3571	0.000787655	0.0109526
ENSMUSG00000051329	Nup160	59015	632.143	-0.193485	0.0576413	-3.35671	0.000788744	0.0109526
ENSMUSG00000075054	Yae1d1	67008	1088.94	-0.213724	0.0636642	-3.35705	0.000787775	0.0109526
ENSMUSG00000010601	Apol7a	75761	20.3911	0.599949	0.178823	3.35499	0.000793683	0.0110069
ENSMUSG00000021188	Trip11	109181	2580.24	-0.18169	0.0541647	-3.35439	0.000795396	0.0110144
ENSMUSG00000061136	Prpf40a	56194	2254.17	-0.21375	0.0637211	-3.35446	0.00079519	0.0110144
ENSMUSG00000019982	Myb	17863	32.0872	-0.522896	0.155924	-3.35352	0.000797898	0.0110408
ENSMUSG00000021457	Syk	20963	197.495	0.28738	0.0857038	3.35317	0.000798903	0.0110466
ENSMUSG00000027574	Nkain4	58237	794.273	0.273001	0.0814394	3.3522	0.000801731	0.0110775
ENSMUSG00000024241	Sos1	20662	3156.02	-0.169356	0.0505282	-3.35172	0.000803117	0.0110854
ENSMUSG00000034258	Flvcr2	217721	75.7438	-0.421118	0.125655	-3.35139	0.000804081	0.0110854
ENSMUSG00000062949	Atp11c	320940	893.279	-0.292583	0.0872996	-3.35148	0.000803805	0.0110854
ENSMUSG00000063434	Sorcs3	66673	1769.04	-0.291065	0.0868809	-3.35016	0.000807655	0.0111265
ENSMUSG00000003438	Timm50	66525	1023.35	0.222533	0.0664379	3.34949	0.000809602	0.0111451
ENSMUSG00000037573	Tob1	22057	1362.25	-0.246383	0.0735679	-3.34906	0.00081087	0.0111544
ENSMUSG00000020954	Strn3	94186	3769.99	-0.175852	0.0525174	-3.34845	0.000812656	0.0111698
ENSMUSG00000028525	Pde4b	18578	4329.74	-0.174605	0.0521478	-3.34827	0.000813185	0.0111698
ENSMUSG00000057706	Mex3b	108797	748.34	-0.244828	0.0731279	-3.34795	0.000814126	0.0111745
ENSMUSG00000024140	Epas1	13819	4486.92	-0.192127	0.0573912	-3.34767	0.00081493	0.0111774
ENSMUSG00000026478	Lamc1	226519	1421.48	-0.220475	0.0659235	-3.3444	0.000824599	0.0113017
ENSMUSG00000025485	Ric8a	101489	2327.71	0.139242	0.0416416	3.34383	0.000826309	0.0113169
ENSMUSG00000027346	Gpcpd1	74182	4446.43	-0.234414	0.0701086	-3.34358	0.000827038	0.0113186
ENSMUSG00000052726	Kcnt2	240776	1232.37	-0.328009	0.0981139	-3.34314	0.000828358	0.0113201
ENSMUSG00000027660	Skil	20482	3271.25	-0.293921	0.0879635	-3.3414	0.000833563	0.0113746
ENSMUSG00000063605	Ccdc102a	234582	57.1716	0.347238	0.103916	3.34151	0.000833249	0.0113746
ENSMUSG00000046139	Patl1	225929	1067.27	-0.1584	0.0474112	-3.34098	0.000834847	0.0113838
ENSMUSG00000030161	Gabarapl1	57436	22173.7	0.168448	0.0504425	3.33941	0.000839579	0.0114317
ENSMUSG00000096942	Rps19-ps6	100503302	1874.91	0.333586	0.099889	3.33957	0.000839094	0.0114317
ENSMUSG00000005125	Ndrg1	17988	2816.53	-0.261951	0.0784581	-3.33873	0.000841614	0.0114443
ENSMUSG00000053205	Styx	56291	129.604	-0.348481	0.104376	-3.3387	0.000841725	0.0114443
ENSMUSG00000029004	Kmt2e	69188	5095.88	-0.202046	0.0605289	-3.338	0.000843832	0.0114646
ENSMUSG00000044609	Gm9294	668668	65.8824	0.510429	0.152958	3.33705	0.00084674	0.0114958
ENSMUSG00000018800	Abca5	217265	2837.95	-0.290379	0.0870357	-3.33633	0.000848932	0.0115005
ENSMUSG00000029234	Tmem165	21982	1081.27	-0.156253	0.046831	-3.33654	0.000848297	0.0115005
ENSMUSG00000057531	Dtnbp1	94245	1721.84	0.231235	0.0693083	3.33633	0.000848931	0.0115005
ENSMUSG00000034285	Nipsnap1	18082	2930.03	0.147878	0.0443399	3.3351	0.000852699	0.0115432
ENSMUSG00000021952	Xpo4	57258	449.715	-0.372344	0.111713	-3.33304	0.000859026	0.0116136
ENSMUSG00000026810	Dpm2	13481	1400.6	0.195369	0.0586166	3.333	0.000859142	0.0116136
ENSMUSG00000003429	Rps11	27207	6107.2	0.24443	0.0733571	3.33206	0.000862059	0.0116363
ENSMUSG00000019738	Polr2i	69920	392.827	0.289763	0.0869657	3.33192	0.000862478	0.0116363
ENSMUSG00000023169	Slc38a1	105727	9543.43	-0.197152	0.0591754	-3.33166	0.000863305	0.0116363
ENSMUSG00000031337	Mtm1	17772	471.799	-0.322123	0.0966838	-3.33172	0.000863106	0.0116363
ENSMUSG00000041134	Cyyr1	224405	144.153	-0.686396	0.206169	-3.32929	0.000870672	0.0117187
ENSMUSG00000035161	Ints6	18130	853.507	-0.208449	0.0626444	-3.32749	0.000876306	0.0117861
ENSMUSG00000032733	Snx33	235406	462.167	-0.200317	0.0602049	-3.32726	0.000877035	0.0117874
ENSMUSG00000001119	Col6a1	12833	3794.05	0.374117	0.112454	3.32684	0.000878361	0.0117968
ENSMUSG00000044617	Zbtb39	320080	488.518	-0.183952	0.0553068	-3.32603	0.000880922	0.0118227
ENSMUSG00000041199	Rpusd1	106707	1862.38	0.253701	0.0763137	3.32445	0.000885928	0.0118559
ENSMUSG00000059248	2021-09-09	53860	2929.37	0.185208	0.0557011	3.32502	0.000884113	0.0118559
ENSMUSG00000059588	Calcrl	54598	304.929	-0.361206	0.108649	-3.32454	0.000885657	0.0118559
ENSMUSG00000068747	Sort1	20661	19856.6	-0.20443	0.0614928	-3.32446	0.000885903	0.0118559
ENSMUSG00000063856	Gpx1	14775	1931.43	0.273022	0.0821314	3.32421	0.000886699	0.0118577
ENSMUSG00000022704	Qtrt2	106248	858.761	-0.130827	0.039359	-3.32393	0.00088757	0.0118609
ENSMUSG00000016984	Etaa1	68145	401.651	-0.231147	0.0695538	-3.32328	0.000889642	0.0118717
ENSMUSG00000098123	Gm4518	100043560	50.3797	0.508471	0.153003	3.32328	0.000889647	0.0118717
ENSMUSG00000032827	Ppp1r9a	243725	13648.2	-0.193694	0.0582902	-3.32292	0.000890797	0.0118786
ENSMUSG00000024122	Pdpk1	18607	6571.08	-0.189772	0.0571211	-3.32228	0.000892853	0.011889
ENSMUSG00000040044	Orc3	50793	1815.98	-0.202059	0.060818	-3.32235	0.000892614	0.011889
ENSMUSG00000037280	Galnt6	207839	646.619	-0.301862	0.0908711	-3.32187	0.000894178	0.0118982
ENSMUSG00000017943	Gdap1l1	228858	2559.01	0.225054	0.067759	3.32139	0.000895719	0.0119103
ENSMUSG00000034647	Ankrd12	106585	3344.72	-0.281518	0.0848089	-3.31944	0.000901985	0.0119766
ENSMUSG00000058690	Ccser2	72972	4939.07	-0.176615	0.0532054	-3.3195	0.000901797	0.0119766
ENSMUSG00000024077	Strn	268980	4775.33	-0.218986	0.0659995	-3.31799	0.000906663	0.0120301
ENSMUSG00000029231	Pdgfra	18595	1995.38	-0.239446	0.072183	-3.31721	0.000909227	0.0120556
ENSMUSG00000039841	Zfp800	627049	474.611	-0.281178	0.0847896	-3.31619	0.000912554	0.0120912
ENSMUSG00000061983	Rps12	20042	5385.02	0.301781	0.0910096	3.31592	0.000913423	0.0120941
ENSMUSG00000050321	Neto1	246317	2279.62	-0.272344	0.0821415	-3.31555	0.000914639	0.0121017
ENSMUSG00000038302	Afg1l	215951	654.398	0.155939	0.0470415	3.31492	0.000916687	0.012113
ENSMUSG00000059033	Rpl18a-ps1	665366	23.7855	0.729432	0.220047	3.31489	0.000916789	0.012113
ENSMUSG00000024019	Cmtr1	74157	456.128	0.232319	0.0700998	3.31411	0.000919346	0.0121382
ENSMUSG00000036403	Cep135	381644	638.289	-0.219771	0.0663237	-3.31362	0.000920977	0.0121437
ENSMUSG00000038702	Dsel	319901	834.18	-0.296834	0.0895808	-3.31359	0.00092106	0.0121437
ENSMUSG00000056752	Dnah9	237806	346.33	-0.279487	0.0843656	-3.31281	0.000923653	0.0121608
ENSMUSG00000059474	Mbtd1	103537	1399.83	-0.209311	0.0631823	-3.31281	0.000923645	0.0121608
ENSMUSG00000021969	Zdhhc20	75965	2797.82	-0.207455	0.0626313	-3.31232	0.000925267	0.0121649
ENSMUSG00000033943	Mga	29808	3345.48	-0.256204	0.0773468	-3.31241	0.000924962	0.0121649
ENSMUSG00000064138	Fam172a	68675	1775.08	-0.168833	0.0509782	-3.31186	0.000926773	0.0121762
ENSMUSG00000017404	Rpl19	19921	5252.9	0.270875	0.0817959	3.3116	0.000927651	0.0121792
ENSMUSG00000033411	Ctdspl2	329506	970.071	-0.296909	0.0896643	-3.31134	0.000928503	0.0121818
ENSMUSG00000042460	C1galt1	94192	312.542	-0.384858	0.116232	-3.31112	0.000929223	0.0121827
ENSMUSG00000048833	Slc39a9	328133	2159.04	-0.134842	0.0407274	-3.31086	0.000930109	0.0121858
ENSMUSG00000020160	Meis1	17268	248.025	-0.323547	0.097734	-3.31049	0.00093133	0.0121933
ENSMUSG00000024059	Clip4	78785	2410.37	-0.148347	0.0448157	-3.31016	0.000932419	0.012199
ENSMUSG00000023845	Lnpep	240028	1600.19	-0.588386	0.177799	-3.30927	0.000935398	0.0122294
ENSMUSG00000085135	Gm13713	625033	97.4658	-0.402794	0.121752	-3.30831	0.000938597	0.0122627
ENSMUSG00000006423	C330007P06Rik	77644	1752.36	-0.177998	0.0538221	-3.30716	0.000942468	0.0123017
ENSMUSG00000035293	G2e3	217558	759.315	-0.279926	0.0846507	-3.30684	0.000943557	0.0123017
ENSMUSG00000048874	Phf3	213109	3851.49	-0.162555	0.0491572	-3.30684	0.000943536	0.0123017
ENSMUSG00000020476	Dbnl	13169	2814.58	0.152398	0.0461097	3.30512	0.000949366	0.0123345
ENSMUSG00000028420	Tmem38b	52076	458.972	-0.134398	0.0406558	-3.30575	0.000947231	0.0123345
ENSMUSG00000031604	Msmo1	66234	3309.36	0.260607	0.0788385	3.30558	0.000947816	0.0123345
ENSMUSG00000079108	Srp54c	100101806	1002.03	-0.238767	0.0722389	-3.30524	0.000948958	0.0123345
ENSMUSG00000091223	Gm8775	100417855	368.988	-0.256007	0.0774491	-3.30548	0.000948128	0.0123345
ENSMUSG00000022119	Rbm26	74213	3078.07	-0.176828	0.0535762	-3.30049	0.000965154	0.0125049
ENSMUSG00000038526	Car14	23831	371.413	-0.270696	0.0820157	-3.30054	0.000964991	0.0125049
ENSMUSG00000033099	Nol12	97961	773.204	0.254256	0.0770421	3.30022	0.0009661	0.0125085
ENSMUSG00000002668	Dennd1c	70785	84.6111	0.43844	0.132869	3.2998	0.000967538	0.0125185
ENSMUSG00000028832	Stmn1	16765	19268.6	0.257959	0.0781857	3.29931	0.000969217	0.0125315
ENSMUSG00000006575	Rundc3a	51799	12582.5	0.215946	0.0654607	3.29887	0.000970758	0.0125428
ENSMUSG00000034059	Ypel4	241525	2745.77	0.185598	0.0562779	3.29789	0.000974151	0.012578
ENSMUSG00000020134	Peli1	67245	1629.31	-0.176047	0.0533897	-3.29739	0.000975868	0.0125915
ENSMUSG00000030180	Kdm5a	214899	2407.93	-0.209443	0.06353	-3.29675	0.000978106	0.0126116
ENSMUSG00000007721	Ccdc124	234388	2349.58	0.316288	0.0959522	3.29631	0.000979633	0.012614
ENSMUSG00000056268	Dennd1b	329260	713.566	-0.204417	0.0620132	-3.29634	0.000979533	0.012614
ENSMUSG00000047466	8030462N17Rik	212163	1059.36	-0.280343	0.0850565	-3.29596	0.000980866	0.0126211
ENSMUSG00000032350	Gclc	14629	2298.34	-0.129543	0.0393209	-3.2945	0.000985983	0.0126522
ENSMUSG00000046756	Mrps7	50529	1427.42	0.220258	0.0668523	3.29469	0.000985287	0.0126522
ENSMUSG00000081051	Gm15427	100041686	2039.54	0.301561	0.0915345	3.29451	0.000985944	0.0126522
ENSMUSG00000039728	Slc6a5	104245	183.604	1.77411	0.538596	3.29396	0.000987878	0.0126678
ENSMUSG00000053436	Mapk14	26416	3891.91	0.116798	0.0354632	3.29349	0.000989533	0.0126804
ENSMUSG00000007653	Gabrb2	14401	4490.3	-0.487748	0.148138	-3.29252	0.00099294	0.0127066
ENSMUSG00000038039	Gcc2	70297	3532.2	-0.259838	0.0789165	-3.29257	0.000992766	0.0127066
ENSMUSG00000024038	Ndufv3	78330	2119.14	0.218721	0.0664429	3.29186	0.000995271	0.0127191
ENSMUSG00000067642	Adgrf3	381628	21.3567	-2.74788	0.834733	-3.29193	0.000995011	0.0127191
ENSMUSG00000003809	Gcdh	270076	1125.92	0.179199	0.0544521	3.29096	0.000998476	0.0127482
ENSMUSG00000043885	Slc36a4	234967	3275.4	-0.173989	0.0528708	-3.29083	0.000998912	0.0127482
ENSMUSG00000021051	Ppp2r5e	26932	3808.28	-0.184504	0.0560825	-3.28986	0.00100238	0.0127504
ENSMUSG00000029787	Avl9	78937	2957.18	-0.187089	0.0568609	-3.29029	0.00100086	0.0127504
ENSMUSG00000030557	Mef2a	17258	6794.99	-0.18776	0.0570674	-3.29015	0.00100136	0.0127504
ENSMUSG00000031290	Lrch2	210297	1562.61	-0.22198	0.0674597	-3.29055	0.000999913	0.0127504
ENSMUSG00000053024	Cntn2	21367	8401.47	-0.186648	0.0567348	-3.28983	0.00100249	0.0127504
ENSMUSG00000014243	Zswim7	69747	305.671	0.25303	0.0769408	3.28863	0.00100676	0.0127961
ENSMUSG00000009731	Kcnd1	16506	695.326	0.165461	0.0503228	3.288	0.00100903	0.0128162
ENSMUSG00000004633	Chn2	69993	1125.89	-0.22646	0.0688788	-3.2878	0.00100972	0.0128162
ENSMUSG00000022463	Srebf2	20788	9267.25	0.194274	0.0590978	3.28733	0.00101142	0.0128292
ENSMUSG00000044072	Eml6	237711	1258.19	-0.256138	0.0779622	-3.28542	0.00101831	0.0129078
ENSMUSG00000043531	Sorcs1	58178	1926.49	-0.235596	0.0717141	-3.28521	0.00101908	0.0129088
ENSMUSG00000004626	Stxbp2	20911	1957.79	0.229197	0.0698039	3.28343	0.0010255	0.012915
ENSMUSG00000004933	Matk	17179	7323.41	0.261994	0.0797923	3.28345	0.00102545	0.012915
ENSMUSG00000030265	Kras	16653	4298.96	-0.182421	0.0555609	-3.28327	0.00102611	0.012915
ENSMUSG00000039759	Thap3	69876	551.26	0.259253	0.0789601	3.28334	0.00102584	0.012915
ENSMUSG00000039982	Dtx4	207521	2303.88	0.139171	0.04237	3.28467	0.00102101	0.012915
ENSMUSG00000050931	Sgms2	74442	170.686	-0.340765	0.103784	-3.28342	0.00102556	0.012915
ENSMUSG00000054387	Mdm4	17248	5206.31	-0.162036	0.0493565	-3.28298	0.00102715	0.012915
ENSMUSG00000055862	Izumo4	71564	1157.89	0.270718	0.0824224	3.28452	0.00102157	0.012915
ENSMUSG00000061436	Hipk2	15258	3875.95	-0.286075	0.0871141	-3.28391	0.00102379	0.012915
ENSMUSG00000072872	Rybp	56353	893.449	-0.222743	0.0678444	-3.28314	0.00102656	0.012915
ENSMUSG00000097006	9530082P21Rik	638247	5256.34	0.254877	0.0776191	3.28369	0.00102457	0.012915
ENSMUSG00000059842	Zfp341	228807	371.119	0.22369	0.068141	3.28275	0.00102801	0.012917
ENSMUSG00000063160	Numbl	18223	4562.88	0.215302	0.0655965	3.28222	0.00102992	0.0129324
ENSMUSG00000062585	Cnr2	12802	17.0815	0.699512	0.21316	3.28163	0.00103208	0.0129507
ENSMUSG00000041153	Osgin2	209212	813.229	-0.152278	0.0464234	-3.2802	0.00103734	0.013008
ENSMUSG00000022673	Mcm4	17217	414.496	-0.194685	0.0593746	-3.27892	0.00104205	0.0130476
ENSMUSG00000034602	Mon2	67074	4064	-0.169316	0.0516399	-3.27878	0.00104258	0.0130476
ENSMUSG00000041203	Trir	68544	1512.71	0.240533	0.0733563	3.27897	0.00104187	0.0130476
ENSMUSG00000021620	Acot12	74156	21.3909	-0.529352	0.161556	-3.27659	0.00105067	0.0131382
ENSMUSG00000074872	Ctxn2	381418	402.933	0.316038	0.0964576	3.27645	0.00105122	0.0131382
ENSMUSG00000045962	Wnk1	232341	10341.5	-0.171091	0.052223	-3.27616	0.0010523	0.0131428
ENSMUSG00000028772	Zcchc17	619605	2345.84	0.201028	0.0613722	3.27556	0.00105452	0.0131618
ENSMUSG00000047986	Palm3	74337	144.042	0.322122	0.0983524	3.27518	0.00105595	0.0131709
ENSMUSG00000004748	Mtfp1	67900	2277.92	0.226907	0.0692891	3.27479	0.0010574	0.0131802
ENSMUSG00000031986	Sprtn	244666	446.943	-0.237412	0.0725058	-3.27439	0.00105892	0.0131903
ENSMUSG00000034761	Map4k5	399510	2156.8	-0.141651	0.0432663	-3.27393	0.00106061	0.0131939
ENSMUSG00000042599	Kdm7a	338523	3230.52	-0.269111	0.082197	-3.27398	0.00106044	0.0131939
ENSMUSG00000008976	Gabpa	14390	1147.68	-0.179397	0.0548035	-3.27346	0.0010624	0.0132073
ENSMUSG00000032440	Tgfbr2	21813	787.063	0.285439	0.0872457	3.27167	0.00106914	0.0132734
ENSMUSG00000078307	AI593442	330941	7857.66	-0.203057	0.0620692	-3.27147	0.00106991	0.0132742
ENSMUSG00000000792	Slc5a5	114479	553.181	0.684188	0.209221	3.27017	0.00107484	0.0133177
ENSMUSG00000002055	Spag5	54141	878.908	0.274665	0.0839888	3.27026	0.00107448	0.0133177
ENSMUSG00000018363	Smurf2	66313	1457.71	-0.139154	0.0425726	-3.26863	0.00108068	0.013341
ENSMUSG00000019362	D8Ertd738e	101966	1486.32	0.291119	0.0890586	3.26885	0.00107984	0.013341
ENSMUSG00000021036	Sptlc2	20773	1598.74	-0.13267	0.0405879	-3.26871	0.0010804	0.013341
ENSMUSG00000040260	Daam2	76441	3864.12	-0.245908	0.075219	-3.26923	0.00107842	0.013341
ENSMUSG00000082321	Gm14253	628707	237.277	-0.285506	0.087331	-3.26924	0.00107839	0.013341
ENSMUSG00000002580	Mien1	103742	394.391	0.315276	0.096481	3.26775	0.00108405	0.01337
ENSMUSG00000042353	Frem3	333315	94.1066	-0.462673	0.141603	-3.26739	0.00108545	0.0133783
ENSMUSG00000052812	Atad2b	320817	442.53	-0.326312	0.0998764	-3.26716	0.00108631	0.0133802
ENSMUSG00000039515	Ptpa	110854	8161.19	0.173692	0.0531776	3.26626	0.00108979	0.0133975
ENSMUSG00000052794	1700030K09Rik	72254	364.258	0.218709	0.0669603	3.26624	0.00108986	0.0133975
ENSMUSG00000049470	Aff4	93736	10174.7	-0.186274	0.0570428	-3.26552	0.00109264	0.0134228
ENSMUSG00000028622	Mrpl37	56280	1812.58	0.106414	0.0325935	3.26487	0.00109513	0.0134446
ENSMUSG00000020048	Hsp90b1	22027	6815.43	-0.237734	0.0728204	-3.26466	0.00109596	0.013446
ENSMUSG00000041670	Rims1	116837	8797.89	0.230811	0.0707385	3.26288	0.00110286	0.0135218
ENSMUSG00000028107	Tars2	71807	1426.72	0.131027	0.0401658	3.26214	0.00110573	0.0135481
ENSMUSG00000039652	Cpeb3	208922	3309	-0.276944	0.0849083	-3.26169	0.00110752	0.0135611
ENSMUSG00000039632	Ccdc151	77609	257.207	0.232414	0.0712601	3.26148	0.00110831	0.013562
ENSMUSG00000030259	Rassf8	71323	1039.69	-0.22142	0.0679043	-3.26077	0.00111111	0.0135696
ENSMUSG00000037400	Atp11b	76295	3964.16	-0.26064	0.0799231	-3.26114	0.00110966	0.0135696
ENSMUSG00000040813	Tex264	21767	2196.28	0.220972	0.0677664	3.2608	0.00111099	0.0135696
ENSMUSG00000020346	Mgat1	17308	2552.16	0.163386	0.0501225	3.25974	0.00111514	0.01361
ENSMUSG00000028069	Gpatch4	66614	750.365	0.223721	0.0686481	3.25895	0.00111825	0.013639
ENSMUSG00000041841	Rpl37	67281	5313.32	0.302719	0.092905	3.25837	0.00112052	0.0136545
ENSMUSG00000052566	Hook2	170833	849.136	0.218707	0.0671238	3.25826	0.00112098	0.0136545
ENSMUSG00000026197	Zfand2b	68818	660.31	0.258535	0.0793523	3.25807	0.00112174	0.0136549
ENSMUSG00000025142	Aspscr1	68938	1144.97	0.164524	0.0505048	3.25759	0.00112363	0.013669
ENSMUSG00000062031	Pgghg	212974	255.493	0.254253	0.0781352	3.25401	0.00113789	0.0138335
ENSMUSG00000035828	Pim3	223775	1361.92	-0.246841	0.0758658	-3.25365	0.00113931	0.0138418
ENSMUSG00000056476	Med12l	329650	1766.14	-0.239897	0.0737378	-3.25337	0.00114045	0.0138466
ENSMUSG00000029392	Rilpl1	75695	2055.84	0.201864	0.0620588	3.25278	0.00114282	0.0138664
ENSMUSG00000018486	Wnt9b	22412	64.0275	-0.762586	0.23448	-3.25224	0.001145	0.0138749
ENSMUSG00000038264	Sema7a	20361	4976.83	-0.249556	0.076733	-3.25227	0.00114489	0.0138749
ENSMUSG00000031608	Galnt7	108150	707.265	-0.220036	0.0676609	-3.25203	0.00114582	0.0138759
ENSMUSG00000026414	Tnnt2	21956	368.933	0.298981	0.0919618	3.25114	0.00114944	0.013901
ENSMUSG00000034855	Cxcl10	15945	24.4995	1.07532	0.330768	3.25097	0.00115012	0.013901
ENSMUSG00000080776	Gm12174	620678	787.108	0.387636	0.119231	3.25115	0.0011494	0.013901
ENSMUSG00000047613	A430005L14Rik	97159	525.952	0.241662	0.0743698	3.24946	0.00115625	0.0139661
ENSMUSG00000028552	Eps15	13858	10088.2	-0.18793	0.057854	-3.24835	0.00116077	0.0140025
ENSMUSG00000042350	Arel1	68497	4863.21	-0.178939	0.0550859	-3.24836	0.00116074	0.0140025
ENSMUSG00000087259	2610035D17Rik	72386	346.403	0.204269	0.0629272	3.24612	0.00116989	0.0141034
ENSMUSG00000040297	Suco	226551	1889.1	-0.194234	0.0598422	-3.24578	0.0011713	0.0141113
ENSMUSG00000024759	Atl3	109168	2188.97	-0.198575	0.0612107	-3.24412	0.00117814	0.0141392
ENSMUSG00000025722	Wdr73	71968	1243.45	0.14129	0.0435498	3.24433	0.00117725	0.0141392
ENSMUSG00000027363	Usp8	84092	2914.75	-0.173227	0.0533824	-3.24503	0.0011744	0.0141392
ENSMUSG00000030341	Tnfrsf1a	21937	369.289	0.314525	0.0969502	3.24419	0.00117783	0.0141392
ENSMUSG00000036282	Naa30	70646	2269.29	-0.15589	0.048047	-3.24454	0.00117641	0.0141392
ENSMUSG00000037190	Cyb561d2	56368	393.88	0.249446	0.0768764	3.24476	0.00117548	0.0141392
ENSMUSG00000054008	Ndst1	15531	4370.55	-0.178006	0.0548791	-3.24361	0.00118027	0.0141556
ENSMUSG00000032717	Mdfi	17240	15.076	0.731244	0.225456	3.24341	0.00118109	0.0141564
ENSMUSG00000048106	4632415L05Rik	70808	318.234	-0.292137	0.0900767	-3.24321	0.00118193	0.0141574
ENSMUSG00000035121	Neil2	382913	121.952	0.26346	0.081251	3.24254	0.00118469	0.0141814
ENSMUSG00000025059	Gk	14933	1199.55	-0.215689	0.066528	-3.24208	0.00118661	0.0141866
ENSMUSG00000020364	Zfp354a	21408	371.809	-0.20094	0.061986	-3.2417	0.00118818	0.014196
ENSMUSG00000040022	Rab11fip2	74998	3157.98	-0.202394	0.0624499	-3.2409	0.00119154	0.0142089
ENSMUSG00000044807	Zfp354c	30944	2097.76	-0.167522	0.051689	-3.24096	0.0011913	0.0142089
ENSMUSG00000056209	Npm3	18150	213.495	0.310287	0.09574	3.24094	0.00119137	0.0142089
ENSMUSG00000012848	Rps5	20103	5402.55	0.282033	0.0870589	3.23956	0.00119715	0.0142214
ENSMUSG00000021534	1700001L19Rik	69315	449.904	0.23411	0.0722574	3.23995	0.00119551	0.0142214
ENSMUSG00000032384	Csnk1g1	214897	1915.43	-0.123996	0.0382677	-3.24022	0.00119435	0.0142214
ENSMUSG00000037685	Atp8a1	11980	9904.04	-0.182921	0.0564635	-3.23963	0.00119684	0.0142214
ENSMUSG00000045257	Morn2	378462	236.298	0.270612	0.0835251	3.23989	0.00119575	0.0142214
ENSMUSG00000047307	Pcdhb13	93884	272.209	-0.309068	0.0953978	-3.23978	0.00119621	0.0142214
ENSMUSG00000023883	Phf10	72057	1924.48	-0.107648	0.0332345	-3.23906	0.00119926	0.0142375
ENSMUSG00000025949	Pikfyve	18711	2723.18	-0.209242	0.0646125	-3.23841	0.00120197	0.0142606
ENSMUSG00000033166	Dis3	72662	577.759	-0.187662	0.0579547	-3.23808	0.00120337	0.0142682
ENSMUSG00000006731	B4galnt1	14421	4310.84	0.245994	0.0760111	3.23629	0.00121092	0.0143487
ENSMUSG00000024906	Mus81	71711	971.202	0.199817	0.0617484	3.23599	0.00121221	0.0143549
ENSMUSG00000035559	Mpv17l2	234384	485.902	0.264617	0.0817875	3.23543	0.00121461	0.0143742
ENSMUSG00000051469	Zfp24	59057	1788.1	-0.153555	0.0474725	-3.23461	0.00121807	0.014406
ENSMUSG00000059355	Wdr83os	414077	461.602	0.341741	0.105691	3.23339	0.00122331	0.0144589
ENSMUSG00000000743	Chmp1a	234852	3853.58	0.200245	0.0619379	3.233	0.001225	0.0144696
ENSMUSG00000033671	Cep350	74081	3099.81	-0.22843	0.0706679	-3.23245	0.00122735	0.0144883
ENSMUSG00000073197	5730507C01Rik	236366	55.1871	-0.395992	0.122552	-3.23123	0.00123258	0.0145409
ENSMUSG00000030030	1700003E16Rik	71837	858.299	0.224922	0.0696321	3.23015	0.00123726	0.0145869
ENSMUSG00000027971	Ndst4	64580	451.599	-0.362395	0.112275	-3.22773	0.00124776	0.0146922
ENSMUSG00000032135	Mcam	84004	624.473	-0.352884	0.109328	-3.22774	0.00124772	0.0146922
ENSMUSG00000029602	Rasal1	19415	3872.01	0.249256	0.0772494	3.22664	0.00125253	0.0147391
ENSMUSG00000039987	Phtf2	68770	781.891	-0.164878	0.0511052	-3.22625	0.00125423	0.0147499
ENSMUSG00000042410	Agps	228061	2264.46	-0.194352	0.0602458	-3.22599	0.00125539	0.0147542
ENSMUSG00000006378	Gcat	26912	368.145	0.24752	0.0767505	3.225	0.00125973	0.0147946
ENSMUSG00000097431	Gm26782	102640338	333.011	-0.855101	0.26516	-3.22485	0.00126041	0.0147946
ENSMUSG00000001663	Gstt1	14871	348.393	0.243038	0.0753687	3.22466	0.00126124	0.0147951
ENSMUSG00000010290	AI597479	98404	1550.72	-0.131278	0.0407276	-3.22331	0.00126716	0.0148553
ENSMUSG00000053626	Tll1	21892	121.761	-0.341027	0.10583	-3.22239	0.00127126	0.0148939
ENSMUSG00000024666	Tmem138	72982	334.62	0.15646	0.0485586	3.22208	0.00127263	0.0149006
ENSMUSG00000036992	Nxt1	56488	246.137	0.235708	0.0731609	3.22177	0.00127401	0.0149075
ENSMUSG00000037605	Adgrl3	319387	3323.46	-0.277711	0.0862201	-3.22096	0.00127764	0.0149406
ENSMUSG00000051111	Sv2c	75209	1135.5	-0.373253	0.115907	-3.22028	0.00128064	0.0149664
ENSMUSG00000022641	Bbx	70508	1587.94	-0.200258	0.0621918	-3.22001	0.00128187	0.0149714
ENSMUSG00000024054	Smchd1	74355	1786.29	-0.188397	0.0585206	-3.21932	0.00128496	0.0149981
ENSMUSG00000063108	Zfp26	22688	765.678	-0.338855	0.105276	-3.21873	0.0012876	0.0150196
ENSMUSG00000035248	Tut7	214290	1944.25	-0.192148	0.0597079	-3.21814	0.00129023	0.015035
ENSMUSG00000048911	Rnf24	51902	1687.89	-0.201729	0.0626861	-3.21808	0.00129053	0.015035
ENSMUSG00000029616	Erp29	67397	2388.28	0.214695	0.0667321	3.21726	0.0012942	0.0150684
ENSMUSG00000005893	Nr2c2	22026	2528.39	-0.313819	0.0975579	-3.21675	0.00129653	0.0150767
ENSMUSG00000013155	Enkd1	102124	265.082	0.27383	0.0851248	3.21681	0.00129625	0.0150767
ENSMUSG00000052584	Serp2	72661	1969.42	0.234926	0.0730362	3.21657	0.00129733	0.0150767
ENSMUSG00000019158	Tmem160	69094	972.67	0.42482	0.132102	3.21585	0.00130057	0.0150769
ENSMUSG00000023452	Pisd	320951	778.353	0.158296	0.0492235	3.21587	0.0013005	0.0150769
ENSMUSG00000042133	Ppig	228005	3543.11	-0.196162	0.060991	-3.21625	0.00129878	0.0150769
ENSMUSG00000099342	Gm18180	100416669	475.115	-0.227253	0.0706618	-3.21606	0.00129961	0.0150769
ENSMUSG00000029810	Tmem176b	65963	1110.9	0.265926	0.0827022	3.21546	0.00130237	0.0150884
ENSMUSG00000013833	Med16	216154	2038.73	0.194623	0.0605361	3.21499	0.0013045	0.0151038
ENSMUSG00000003282	Plag1	56711	176.27	-0.424244	0.131972	-3.21466	0.00130598	0.0151056
ENSMUSG00000045991	Onecut2	225631	366.084	-0.549973	0.171086	-3.2146	0.00130627	0.0151056
ENSMUSG00000038954	Supt3	109115	381.5	0.186754	0.0581016	3.21426	0.0013078	0.0151071
ENSMUSG00000064125	Prr36	73072	1360.92	0.245444	0.076362	3.21422	0.00130801	0.0151071
ENSMUSG00000045215	Asxl3	211961	731.17	-0.193729	0.0602761	-3.21403	0.00130887	0.0151076
ENSMUSG00000035934	Pknox2	208076	2554.95	0.203738	0.0634172	3.21266	0.00131514	0.0151707
ENSMUSG00000025532	Crcp	12909	976.737	0.14977	0.0466277	3.21203	0.001318	0.0151944
ENSMUSG00000003226	Ranbp2	19386	5945.13	-0.290803	0.0905495	-3.21154	0.00132027	0.0152111
ENSMUSG00000048490	Nrip1	268903	1635.6	-0.205204	0.0639051	-3.21108	0.00132237	0.015226
ENSMUSG00000067870	Rpl31-ps8	667682	6411.24	0.329168	0.10252	3.21077	0.0013238	0.0152331
ENSMUSG00000102976	Zc3h11a	70579	406.991	-0.319713	0.0995921	-3.21023	0.00132631	0.0152525
ENSMUSG00000040263	Klhdc4	234825	988.283	0.20909	0.0651545	3.20914	0.00133133	0.0153009
ENSMUSG00000058152	Chsy3	78923	329.017	-0.360346	0.112319	-3.20824	0.0013355	0.0153394
ENSMUSG00000037656	Slc20a2	20516	1975.04	-0.183054	0.057066	-3.20775	0.00133778	0.0153562
ENSMUSG00000032537	Ephb1	270190	1689.2	-0.202856	0.0632522	-3.2071	0.00134083	0.0153817
ENSMUSG00000007827	Ankrd26	232339	1035.58	-0.229348	0.0715235	-3.2066	0.00134312	0.0153985
ENSMUSG00000075334	Rprm	67874	1708.41	0.361277	0.112674	3.20638	0.00134414	0.0154009
ENSMUSG00000017664	Slc35c2	228875	2018.15	0.187111	0.0583601	3.20614	0.00134528	0.0154045
ENSMUSG00000033430	Terf2ip	57321	2065.73	0.150427	0.0469281	3.20547	0.00134841	0.0154145
ENSMUSG00000034424	Gcsh	68133	1566.97	0.264181	0.0824168	3.20543	0.00134862	0.0154145
ENSMUSG00000062203	Gspt1	14852	2593.31	-0.245323	0.0765256	-3.20576	0.00134706	0.0154145
ENSMUSG00000030304	Ergic2	67456	1448.2	-0.17756	0.0553981	-3.20517	0.00134982	0.0154188
ENSMUSG00000071068	Treml2	328833	30.6346	0.881197	0.274994	3.20442	0.00135336	0.0154497
ENSMUSG00000001794	Capns1	12336	5511.77	0.207316	0.0647165	3.20345	0.00135792	0.0154693
ENSMUSG00000034189	Hsdl1	72552	2204.36	0.139104	0.0434228	3.20349	0.00135773	0.0154693
ENSMUSG00000036304	Zdhhc23	332175	305.63	-0.317493	0.0991126	-3.20335	0.00135838	0.0154693
ENSMUSG00000054942	Miga1	215708	5976.33	-0.19171	0.0598412	-3.20365	0.00135698	0.0154693
ENSMUSG00000028020	Glrb	14658	9228.69	-0.193753	0.0604939	-3.20285	0.00136077	0.0154793
ENSMUSG00000056153	Socs6	54607	1003.03	-0.172429	0.0538368	-3.20282	0.00136091	0.0154793
ENSMUSG00000020392	Cdkn2aipnl	52626	1524.56	0.16125	0.0503513	3.2025	0.00136238	0.0154866
ENSMUSG00000036949	Slc39a12	277468	1666.94	-0.291186	0.0909383	-3.20202	0.00136468	0.0155032
ENSMUSG00000081683	Fzd10	93897	81.9022	-0.430007	0.1343	-3.20185	0.00136549	0.0155032
ENSMUSG00000060063	Alox5ap	11690	123.203	0.339221	0.105994	3.20038	0.00137249	0.0155732
ENSMUSG00000000605	Clcn4	12727	8131.21	-0.126474	0.0395258	-3.19979	0.00137529	0.0155955
ENSMUSG00000083245	Gm11185	667985	27.5173	0.579565	0.181153	3.19932	0.00137753	0.0156115
ENSMUSG00000036402	Gng12	14701	2208.56	-0.147163	0.0460047	-3.19886	0.00137973	0.0156269
ENSMUSG00000034751	Mast4	328329	2936.65	-0.202996	0.0634822	-3.19768	0.00138538	0.0156624
ENSMUSG00000066487	Gm5786	544872	259.016	0.43303	0.13542	3.19768	0.00138537	0.0156624
ENSMUSG00000071078	Nr2c2ap	75692	73.297	0.432501	0.135253	3.19772	0.00138518	0.0156624
ENSMUSG00000030607	Acan	11595	200.847	-0.385772	0.120659	-3.1972	0.00138767	0.0156628
ENSMUSG00000031149	Praf2	54637	2520.01	0.178875	0.0559469	3.19723	0.00138754	0.0156628
ENSMUSG00000068240	Gm11808	666586	8195.3	0.305623	0.0955923	3.19715	0.00138792	0.0156628
ENSMUSG00000035594	Chrna5	110835	86.5159	-0.426474	0.133402	-3.19692	0.00138905	0.0156661
ENSMUSG00000025081	Tdrd1	83561	21.3106	0.783259	0.24506	3.19619	0.00139256	0.015682
ENSMUSG00000026764	Kif5c	16574	36226.5	-0.18195	0.0569247	-3.19633	0.00139188	0.015682
ENSMUSG00000026972	Arrdc1	215705	420.849	0.234202	0.0732786	3.19605	0.00139323	0.015682
ENSMUSG00000037971	1110032A03Rik	68721	785.268	0.275921	0.086335	3.19593	0.0013938	0.015682
ENSMUSG00000040373	Cacng5	140723	791.785	-0.310464	0.0971664	-3.19517	0.00139746	0.0157137
ENSMUSG00000022800	Fyttd1	69823	3939.35	-0.137817	0.0431475	-3.19409	0.00140272	0.0157634
ENSMUSG00000030678	Maz	17188	5880.02	0.183628	0.0575026	3.19338	0.00140616	0.0157925
ENSMUSG00000030401	Rtn2	20167	3007.32	0.240642	0.0753753	3.19258	0.00141008	0.0158261
ENSMUSG00000087475	4933406I18Rik	71045	48.987	-0.510175	0.159808	-3.19242	0.00141084	0.0158261
ENSMUSG00000063410	Stk24	223255	1615.71	-0.218361	0.0684045	-3.1922	0.00141195	0.015829
ENSMUSG00000021413	Prpf4b	19134	3759.23	-0.194969	0.0610922	-3.19139	0.00141591	0.0158355
ENSMUSG00000028373	Astn2	56079	1464.65	-0.256154	0.0802528	-3.19184	0.00141367	0.0158355
ENSMUSG00000037572	Wdhd1	218973	292.48	-0.24831	0.077801	-3.1916	0.00141487	0.0158355
ENSMUSG00000049960	Mrps16	66242	660.641	0.282337	0.0884683	3.1914	0.00141587	0.0158355
ENSMUSG00000021189	Atxn3	110616	1575.48	-0.15844	0.0496523	-3.19099	0.00141788	0.0158481
ENSMUSG00000031617	Tmem184c	234463	2526.84	-0.153669	0.0481638	-3.19054	0.00142006	0.015863
ENSMUSG00000043644	0610009L18Rik	66838	117.541	0.337733	0.105872	3.19	0.00142271	0.0158642
ENSMUSG00000079509	Zfx	22764	1118.13	-0.183142	0.0574105	-3.19004	0.00142254	0.0158642
ENSMUSG00000100078	Gm6170	620659	1372.41	0.303557	0.0951553	3.19012	0.00142215	0.0158642
ENSMUSG00000040883	Tmem205	235043	625.21	0.282298	0.0885005	3.18979	0.00142374	0.0158661
ENSMUSG00000058099	Nfam1	74039	146.677	0.323996	0.101578	3.18963	0.00142457	0.0158661
ENSMUSG00000031256	Cstf2	108062	4551.36	-0.155658	0.0488545	-3.18615	0.00144181	0.0160294
ENSMUSG00000043866	Taf10	24075	938.209	0.25475	0.0799554	3.18615	0.00144179	0.0160294
ENSMUSG00000073490	Ifi207	226691	20.5349	1.04619	0.328344	3.18625	0.0014413	0.0160294
ENSMUSG00000056938	Acbd4	67131	1300	0.211812	0.066484	3.18591	0.001443	0.0160331
ENSMUSG00000035713	Usp35	244144	1382.96	0.166281	0.0522018	3.18535	0.00144581	0.0160455
ENSMUSG00000091119	Ccdc152	100039139	21.8094	-0.581701	0.182618	-3.18534	0.00144582	0.0160455
ENSMUSG00000030509	Asb7	117589	905.19	-0.127375	0.0399992	-3.18444	0.00145033	0.0160859
ENSMUSG00000020015	Cdk17	237459	8331.13	-0.186705	0.0586412	-3.18386	0.00145328	0.01609
ENSMUSG00000023904	Hcfc1r1	353502	2009.8	0.247359	0.0776898	3.18393	0.00145288	0.01609
ENSMUSG00000033862	Cdk10	234854	2406.23	0.217904	0.0684343	3.18413	0.00145188	0.01609
ENSMUSG00000048939	Atp13a5	268878	435.064	-0.289812	0.0910337	-3.18357	0.00145471	0.01609
ENSMUSG00000056608	Chd9	109151	3542.17	-0.175744	0.0552046	-3.18351	0.001455	0.01609
ENSMUSG00000024610	Cd74	16149	348.676	0.868628	0.272884	3.18315	0.00145684	0.0160917
ENSMUSG00000028669	Pithd1	66193	2791.75	0.207867	0.0653024	3.18314	0.00145687	0.0160917
ENSMUSG00000064317	Gm10146	100041500	761.371	0.279353	0.0877697	3.1828	0.00145858	0.0161011
ENSMUSG00000039660	Spout1	227695	990.49	0.172456	0.0541915	3.18234	0.00146091	0.0161012
ENSMUSG00000056612	Ppp1r14b	18938	634.535	0.288844	0.0907661	3.18229	0.00146116	0.0161012
ENSMUSG00000079304	Tex52	71149	65.5887	-0.432165	0.135797	-3.18243	0.00146043	0.0161012
ENSMUSG00000068284	Usf3	207806	3382.65	-0.229588	0.0721506	-3.18207	0.00146227	0.0161039
ENSMUSG00000025132	Arhgdia	192662	9447.94	0.220068	0.0691755	3.18131	0.00146613	0.0161369
ENSMUSG00000006386	Tek	21687	348.552	-0.457941	0.144016	-3.17979	0.0014738	0.016155
ENSMUSG00000022789	Dnm1l	74006	10073.6	-0.145032	0.0456092	-3.17988	0.00147336	0.016155
ENSMUSG00000027750	Postn	50706	185.014	-0.390502	0.122797	-3.18007	0.00147241	0.016155
ENSMUSG00000036352	Ubac1	98766	1639.2	0.139578	0.0438878	3.18033	0.00147107	0.016155
ENSMUSG00000042272	Sestd1	228071	3526.26	-0.168151	0.0528774	-3.18002	0.00147266	0.016155
ENSMUSG00000042446	Zmym4	67785	2835.36	-0.133246	0.041904	-3.17979	0.00147382	0.016155
ENSMUSG00000057060	Slc35f3	210027	1187.26	-0.175996	0.0553419	-3.18015	0.00147197	0.016155
ENSMUSG00000005370	Msh6	17688	872.42	-0.16018	0.0503835	-3.17922	0.00147672	0.0161774
ENSMUSG00000028282	Casp8ap2	26885	672.169	-0.226281	0.0712	-3.1781	0.00148245	0.0161807
ENSMUSG00000029204	Rhoh	74734	34.8749	0.445806	0.140262	3.17838	0.001481	0.0161807
ENSMUSG00000031029	Eif3f	66085	4097.85	0.226103	0.0711734	3.17679	0.00148912	0.0161807
ENSMUSG00000031196	F8	14069	127.423	-0.346654	0.109092	-3.17764	0.00148481	0.0161807
ENSMUSG00000038172	Ttc39b	69863	3254.29	-0.240316	0.0756126	-3.17825	0.00148167	0.0161807
ENSMUSG00000043183	Simc1	319719	785.587	-0.163523	0.0514566	-3.17788	0.00148357	0.0161807
ENSMUSG00000045349	Sh2d5	230863	3972.64	0.225813	0.071077	3.17702	0.00148796	0.0161807
ENSMUSG00000047344	Lancl3	236285	216.348	-0.44949	0.141458	-3.17755	0.00148523	0.0161807
ENSMUSG00000049606	Zfp644	52397	2375.37	-0.178939	0.0563258	-3.17687	0.00148876	0.0161807
ENSMUSG00000057762	Gm6169	620648	92.7438	0.398746	0.125512	3.17696	0.00148827	0.0161807
ENSMUSG00000062012	Zfp13	22654	660.136	0.148738	0.046794	3.17856	0.0014801	0.0161807
ENSMUSG00000064030	Pym1	78428	593.094	0.230257	0.0724672	3.1774	0.00148601	0.0161807
ENSMUSG00000074129	Rpl13a	22121	14870.4	0.31423	0.0988518	3.1788	0.00147886	0.0161807
ENSMUSG00000032246	Calml4	75600	60.5604	-0.647336	0.203794	-3.17643	0.00149102	0.0161919
ENSMUSG00000053559	Smagp	207818	33.6983	0.450809	0.141933	3.17621	0.00149211	0.0161944
ENSMUSG00000035572	Dcaf10	242418	981.662	-0.14344	0.0451786	-3.17496	0.00149858	0.0162551
ENSMUSG00000011096	Akt1s1	67605	1412.8	0.211794	0.0667146	3.17463	0.00150027	0.0162641
ENSMUSG00000027327	1700037H04Rik	67326	1977.74	0.222784	0.0701859	3.1742	0.00150252	0.016279
ENSMUSG00000019935	Slc17a8	216227	215.757	-0.348793	0.109938	-3.17262	0.00151071	0.0163583
ENSMUSG00000034248	Slc25a37	67712	1789.07	-0.157627	0.0496863	-3.17244	0.00151162	0.0163586
ENSMUSG00000047881	Rell1	100532	477.554	-0.217029	0.0684288	-3.17161	0.00151598	0.0163964
ENSMUSG00000025732	Mcrip2	68241	247.854	0.333494	0.105172	3.17094	0.00151949	0.0164248
ENSMUSG00000025902	Sox17	20671	162.183	-0.433286	0.136667	-3.17038	0.0015224	0.0164296
ENSMUSG00000041747	Utp15	105372	1193.76	-0.134979	0.0425733	-3.17052	0.00152168	0.0164296
ENSMUSG00000049878	Rlf	109263	1551.74	-0.163409	0.0515458	-3.17016	0.00152355	0.0164296
ENSMUSG00000050623	Catsperz	67077	230.138	0.307656	0.0970541	3.16995	0.00152466	0.0164296
ENSMUSG00000056735	A930024E05Rik	109202	107.112	0.249975	0.0788603	3.16985	0.00152519	0.0164296
ENSMUSG00000096910	Zfp955b	100043468	377.885	-0.307151	0.0968828	-3.17034	0.00152262	0.0164296
ENSMUSG00000083373	Gm13392	100504187	56.4251	0.390627	0.123251	3.16936	0.00152775	0.0164477
ENSMUSG00000016554	Eif3d	55944	1206.22	0.220487	0.0695757	3.16902	0.00152955	0.0164576
ENSMUSG00000066647	Gm5113	330503	686.443	-0.229877	0.0725529	-3.16841	0.00153277	0.0164828
ENSMUSG00000024446	Rpp21	67676	406.561	0.306886	0.0968681	3.16808	0.0015345	0.0164919
ENSMUSG00000029385	Ccng2	12452	1731.47	-0.165346	0.0521981	-3.16767	0.00153668	0.0165059
ENSMUSG00000002825	Qtrt1	60507	522.909	0.209553	0.0661614	3.1673	0.00153859	0.0165089
ENSMUSG00000023961	Enpp4	224794	1344.12	-0.224564	0.0709012	-3.16728	0.00153873	0.0165089
ENSMUSG00000029614	Rpl6	19988	3697.02	0.238547	0.0753301	3.16669	0.00154185	0.016533
ENSMUSG00000033191	Tie1	21846	295.748	-0.501759	0.158507	-3.16554	0.00154796	0.016589
ENSMUSG00000071644	Eef1g	67160	9300.36	0.204027	0.0644961	3.1634	0.00155936	0.0167015
ENSMUSG00000055371	Stam2	56324	1158.24	-0.1939	0.0613034	-3.16295	0.00156177	0.0167082
ENSMUSG00000103973	BC055308	407818	29.0508	-0.532631	0.168394	-3.16301	0.00156147	0.0167082
ENSMUSG00000026279	Thap4	67026	509.666	0.204674	0.0647231	3.1623	0.00156526	0.016736
ENSMUSG00000003604	Aven	74268	354.018	0.214993	0.0679902	3.16211	0.00156628	0.0167374
ENSMUSG00000041235	Chd7	320790	872.514	-0.258054	0.0816291	-3.1613	0.00157066	0.0167746
ENSMUSG00000020775	Mrpl38	60441	1249.93	0.193046	0.0610886	3.16011	0.00157712	0.0168141
ENSMUSG00000025078	Nhlrc2	66866	461.432	-0.259036	0.0819759	-3.1599	0.00157823	0.0168141
ENSMUSG00000034825	Nrip3	78593	6357.87	-0.179409	0.0567723	-3.16015	0.00157686	0.0168141
ENSMUSG00000041301	Cftr	12638	56.3456	-0.500923	0.158525	-3.1599	0.00157822	0.0168141
ENSMUSG00000059005	Hnrnpa3	229279	9390.12	-0.106641	0.0337493	-3.15979	0.00157884	0.0168141
ENSMUSG00000031385	Plxnb3	140571	1468.72	-0.322687	0.102131	-3.15953	0.00158024	0.0168194
ENSMUSG00000050192	Eif5a2	208691	2994.97	-0.26849	0.0849887	-3.15912	0.00158246	0.0168335
ENSMUSG00000032253	Phip	83946	3108.72	-0.258478	0.0818284	-3.15878	0.00158432	0.0168341
ENSMUSG00000068130	Zfp442	668923	111.604	-0.365347	0.115657	-3.15888	0.00158375	0.0168341
ENSMUSG00000004317	Clcn5	12728	895.023	-0.235285	0.0744953	-3.15838	0.00158647	0.0168474
ENSMUSG00000024007	Ppil1	68816	538.192	0.211154	0.0668703	3.15767	0.00159036	0.01686
ENSMUSG00000026663	Atf6	226641	3282.61	-0.203228	0.0643574	-3.15781	0.00158961	0.01686
ENSMUSG00000030759	Far1	67420	4830.84	-0.216182	0.0684583	-3.15787	0.00158928	0.01686
ENSMUSG00000083713	Gm5883	545873	180.757	0.310311	0.0983039	3.15664	0.00159596	0.0169097
ENSMUSG00000032193	Ldlr	16835	1252.99	0.279872	0.0886769	3.15609	0.001599	0.0169228
ENSMUSG00000041986	Elmod1	270162	8251.29	-0.134694	0.0426774	-3.15609	0.001599	0.0169228
ENSMUSG00000039103	Nexn	68810	458.111	-0.476167	0.150902	-3.15547	0.00160238	0.016949
ENSMUSG00000057766	Ankrd29	225187	817.647	-0.160169	0.0507863	-3.15379	0.00161168	0.0170377
ENSMUSG00000029440	Psmd9	67151	819.998	0.123421	0.039153	3.15227	0.00162009	0.017117
ENSMUSG00000032328	Tmem30a	69981	18641.9	-0.201531	0.0639761	-3.1501	0.00163215	0.0172347
ENSMUSG00000034595	Ppp1r18	76448	303.34	0.198132	0.062934	3.14825	0.0016425	0.0173342
ENSMUSG00000052917	Senp7	66315	1542.33	-0.20637	0.0655566	-3.14797	0.00164406	0.0173409
ENSMUSG00000027748	Trpc4	22066	639.879	-0.25863	0.0821874	-3.14683	0.00165051	0.0173991
ENSMUSG00000036446	Lum	17022	132.326	0.560965	0.178276	3.14661	0.00165172	0.0174021
ENSMUSG00000032902	Slc16a1	20501	1871.03	-0.250183	0.0795138	-3.14641	0.00165288	0.0174045
ENSMUSG00000038733	Wdr26	226757	5635.6	-0.118356	0.0376192	-3.14617	0.00165425	0.0174092
ENSMUSG00000021470	Ercc6l2	76251	988.748	-0.201662	0.0641299	-3.14459	0.00166317	0.0174886
ENSMUSG00000031818	Cox4i1	12857	11614.8	0.264231	0.0840295	3.14451	0.00166366	0.0174886
ENSMUSG00000020570	Sypl	19027	2097.71	-0.172874	0.0549877	-3.14386	0.00166736	0.01751
ENSMUSG00000051527	Usp29	57775	933.76	-0.389315	0.123835	-3.14382	0.00166757	0.01751
ENSMUSG00000030335	Mrpl51	66493	1311.32	0.120944	0.0384777	3.14323	0.00167096	0.0175357
ENSMUSG00000020189	Osbpl8	237542	5422.82	-0.23533	0.0748859	-3.14252	0.00167502	0.0175685
ENSMUSG00000027490	E2f1	13555	550.881	0.220675	0.070228	3.14226	0.00167648	0.0175739
ENSMUSG00000038535	Zfp280d	235469	1498.34	-0.217124	0.0691109	-3.14168	0.00167982	0.0175991
ENSMUSG00000029649	Pomp	66537	3227.74	0.207384	0.0660511	3.13975	0.00169093	0.0177056
ENSMUSG00000020140	Lgr5	14160	282.601	-0.600218	0.191186	-3.13944	0.00169273	0.0177145
ENSMUSG00000020372	Rack1	14694	6108.62	0.204255	0.0650661	3.1392	0.00169411	0.017719
ENSMUSG00000030697	Ppp4c	56420	1004.11	0.217875	0.0694504	3.13713	0.00170611	0.0178346
ENSMUSG00000021259	Cyp46a1	13116	7687	0.226679	0.0722653	3.13676	0.00170827	0.0178386
ENSMUSG00000027981	Rnpc3	67225	1150.8	-0.313828	0.100119	-3.13454	0.00172121	0.0179624
ENSMUSG00000043029	Trpv3	246788	105.641	-0.298181	0.0951394	-3.13415	0.00172355	0.0179667
ENSMUSG00000025544	Tm9sf2	68059	5094.47	-0.188262	0.0600814	-3.13344	0.00172767	0.0179997
ENSMUSG00000021376	Tpmt	22017	181.317	-0.247893	0.0791209	-3.13309	0.00172975	0.0180114
ENSMUSG00000015305	Sash1	70097	3249.36	-0.220605	0.0704199	-3.13272	0.00173197	0.0180244
ENSMUSG00000018171	Vmp1	75909	3681.74	-0.172985	0.05523	-3.13209	0.00173564	0.0180501
ENSMUSG00000032553	Srprb	20818	777.99	0.223491	0.071358	3.13197	0.00173637	0.0180501
ENSMUSG00000031878	Nae1	234664	2071.75	-0.167501	0.0534842	-3.13178	0.0017375	0.0180519
ENSMUSG00000019856	Fam184a	75906	1301.05	-0.205033	0.0654852	-3.13098	0.00174225	0.0180612
ENSMUSG00000034911	Ushbp1	234395	187.024	-0.389532	0.124405	-3.13117	0.00174113	0.0180612
ENSMUSG00000039804	Ncoa5	228869	2269.03	0.134246	0.0428754	3.13107	0.0017417	0.0180612
ENSMUSG00000064115	Cadm2	239857	11084	-0.192396	0.0614429	-3.1313	0.00174037	0.0180612
ENSMUSG00000054520	Sh3bp2	24055	190.036	0.302934	0.0967708	3.13043	0.00174553	0.0180851
ENSMUSG00000063146	Clip2	269713	7419.37	0.197127	0.0629763	3.13018	0.00174697	0.0180901
ENSMUSG00000057506	Bloc1s2	73689	1024.64	0.230473	0.0736338	3.12998	0.00174816	0.0180924
ENSMUSG00000005907	Pex1	71382	1033.97	-0.137805	0.044045	-3.12874	0.00175558	0.018139
ENSMUSG00000038838	Vars2	68915	1154.5	0.201286	0.0643297	3.12898	0.00175417	0.018139
ENSMUSG00000057133	Chd6	71389	4982.83	-0.162138	0.0518194	-3.1289	0.00175463	0.018139
ENSMUSG00000021374	Nup153	218210	2049.9	-0.203314	0.06501	-3.12742	0.00176348	0.0182084
ENSMUSG00000093565	Rab26os	75614	85.4753	0.410655	0.131313	3.12729	0.00176423	0.0182084
ENSMUSG00000000340	Dbt	13171	719.528	-0.194892	0.062329	-3.12683	0.00176701	0.0182125
ENSMUSG00000015749	Anp32e	66471	4317.29	-0.154378	0.0493734	-3.12674	0.00176756	0.0182125
ENSMUSG00000031529	Tnks	21951	2878.23	-0.324125	0.103659	-3.12684	0.00176695	0.0182125
ENSMUSG00000010358	Ifi35	70110	81.0473	0.325466	0.104108	3.12624	0.00177054	0.0182311
ENSMUSG00000024181	Mrpl28	68611	1396.22	0.238083	0.0761594	3.12612	0.0017713	0.0182311
ENSMUSG00000040265	Dnm3	103967	8316.57	-0.207033	0.0662477	-3.12514	0.00177723	0.0182812
ENSMUSG00000066735	Vkorc1l1	69568	1686.23	-0.189479	0.0606344	-3.12495	0.00177837	0.0182812
ENSMUSG00000081572	Gm14138	545640	15.6325	0.653367	0.209089	3.12483	0.00177911	0.0182812
ENSMUSG00000048047	Zbtb33	56805	1237.09	-0.232618	0.0744483	-3.12456	0.00178069	0.0182875
ENSMUSG00000026860	Sh3glb2	227700	8267.63	0.197526	0.0632319	3.12383	0.00178514	0.0183131
ENSMUSG00000033940	Brk1	101314	5062.27	0.212547	0.0680394	3.12388	0.00178482	0.0183131
ENSMUSG00000047721	Bola2	66162	795.495	0.308703	0.0988551	3.12278	0.00179152	0.0183685
ENSMUSG00000060487	Samd5	320825	298.617	-0.343484	0.11001	-3.12229	0.00179447	0.0183887
ENSMUSG00000024911	Fibp	58249	1224.51	0.171908	0.0550675	3.12177	0.00179766	0.0183993
ENSMUSG00000049670	Morn4	226123	2170.24	0.171809	0.0550389	3.12159	0.00179876	0.0183993
ENSMUSG00000055341	Zfp457	431706	63.2908	-0.520557	0.166761	-3.12158	0.00179885	0.0183993
ENSMUSG00000081406	Rps6-ps4	105244208	8252.4	0.221707	0.0710263	3.12148	0.00179944	0.0183993
ENSMUSG00000031010	Usp9x	22284	12996.9	-0.222694	0.0713478	-3.12125	0.00180085	0.0184037
ENSMUSG00000021928	Ebpl	68177	405.478	0.219233	0.0702739	3.11969	0.00181042	0.0184813
ENSMUSG00000031555	Adam9	11502	2278.33	-0.191826	0.0614859	-3.11983	0.00180955	0.0184813
ENSMUSG00000003235	Eif2b5	224045	2294.07	0.155888	0.0499746	3.11935	0.00181251	0.0184925
ENSMUSG00000034755	Pcdh11x	245578	1060.68	-0.293746	0.0941835	-3.11887	0.00181546	0.0185025
ENSMUSG00000043336	Filip1l	78749	151.766	-0.493865	0.158345	-3.11892	0.00181518	0.0185025
ENSMUSG00000022799	Arhgap31	12549	1146	-0.235615	0.0755609	-3.11821	0.00181951	0.0185236
ENSMUSG00000074406	Zfp628	232816	513.007	0.22484	0.0721033	3.1183	0.00181899	0.0185236
ENSMUSG00000015882	Lcorl	209707	903.126	-0.235943	0.0756876	-3.11732	0.00182501	0.0185695
ENSMUSG00000042178	Armc5	233912	620.272	0.215811	0.0692449	3.11663	0.00182932	0.0186033
ENSMUSG00000024384	Iws1	73473	2351.2	-0.176266	0.0565717	-3.1158	0.00183446	0.0186454
ENSMUSG00000040209	Zfp704	170753	3160.32	-0.140482	0.0450893	-3.11563	0.00183555	0.0186463
ENSMUSG00000019726	Lyst	17101	2393.83	-0.303312	0.0973583	-3.11542	0.00183681	0.018649
ENSMUSG00000000420	Galnt1	14423	2035.81	-0.154353	0.0495529	-3.1149	0.00184005	0.0186717
ENSMUSG00000004285	Atp6v1f	66144	3073.57	0.218494	0.0701499	3.11468	0.00184147	0.018676
ENSMUSG00000040396	Abhd13	68904	1731.68	-0.199252	0.0639926	-3.11367	0.00184779	0.0187199
ENSMUSG00000063236	1110038F14Rik	117171	507.13	0.200338	0.0643384	3.11381	0.00184688	0.0187199
ENSMUSG00000034501	Pcnx4	67708	1701.83	-0.161017	0.0517243	-3.11299	0.00185204	0.0187528
ENSMUSG00000078942	Naip6	17952	42.1283	0.598287	0.192218	3.11255	0.00185479	0.0187705
ENSMUSG00000002660	Clpp	53895	1424.97	0.252557	0.0811469	3.11234	0.00185609	0.0187735
ENSMUSG00000022201	Zfr	22763	12268.6	-0.180189	0.0578988	-3.11214	0.00185737	0.0187763
ENSMUSG00000067795	4930444P10Rik	75799	33.6571	0.425286	0.136671	3.11174	0.00185989	0.0187916
ENSMUSG00000021365	Nedd9	18003	370.62	-0.235621	0.0757366	-3.11106	0.00186417	0.0188146
ENSMUSG00000035840	Lysmd3	80289	356.627	-0.293693	0.0943984	-3.11121	0.00186325	0.0188146
ENSMUSG00000024601	Isoc1	66307	948.678	-0.200855	0.0645683	-3.11074	0.00186618	0.0188247
ENSMUSG00000049872	Calhm5	103511	186.344	0.263918	0.0848536	3.11028	0.00186911	0.0188441
ENSMUSG00000014245	Pigl	327942	322.1	-0.141794	0.0455973	-3.10969	0.00187282	0.0188713
ENSMUSG00000072812	Ahnak2	100041194	246.949	0.353314	0.113638	3.10911	0.00187651	0.0188983
ENSMUSG00000031101	Sash3	74131	79.6647	0.378317	0.121723	3.108	0.00188355	0.0189501
ENSMUSG00000033777	Tlr13	279572	121.567	0.458734	0.147598	3.10799	0.00188368	0.0189501
ENSMUSG00000026087	Mrpl30	107734	1463.87	0.209209	0.0673217	3.1076	0.00188612	0.0189645
ENSMUSG00000030220	Arhgdib	11857	272.59	0.329133	0.105926	3.10721	0.00188862	0.0189794
ENSMUSG00000045107	Saysd1	67509	233.477	0.199388	0.0641763	3.10688	0.00189072	0.0189904
ENSMUSG00000030680	Pagr1a	67278	717.873	0.262847	0.0846271	3.10594	0.00189677	0.0190409
ENSMUSG00000075510	Fam187a	66784	17.8184	0.784104	0.25247	3.10573	0.00189812	0.0190443
ENSMUSG00000022474	Pmm1	29858	4386.56	0.239514	0.0771612	3.10407	0.00190878	0.0191102
ENSMUSG00000027799	Nbea	26422	11813.5	-0.213515	0.0687845	-3.10412	0.00190846	0.0191102
ENSMUSG00000033039	Micall1	27008	1368.41	-0.188235	0.0606399	-3.10415	0.00190825	0.0191102
ENSMUSG00000003929	Zfp81	224694	1491.17	-0.225556	0.0726757	-3.10359	0.00191189	0.0191312
ENSMUSG00000029146	Snx17	266781	2893.61	0.161759	0.0521379	3.10253	0.00191875	0.0191896
ENSMUSG00000028524	Sgip1	73094	6427.12	-0.168571	0.0543419	-3.10204	0.00192192	0.0192007
ENSMUSG00000028684	Urod	22275	1366.03	0.14269	0.0460012	3.10188	0.00192294	0.0192007
ENSMUSG00000047617	Paxx	227622	1137.56	0.238453	0.0768673	3.10214	0.00192125	0.0192007
ENSMUSG00000033282	Rpgrip1l	244585	1374.9	-0.174647	0.0563099	-3.10154	0.0019252	0.019213
ENSMUSG00000021713	Ppwd1	238831	379.058	-0.213259	0.0687738	-3.10087	0.00192953	0.0192459
ENSMUSG00000042742	Bmt2	101148	1531.13	-0.171716	0.0553904	-3.10011	0.00193451	0.0192751
ENSMUSG00000066456	Hmgn3	94353	1248.19	0.193065	0.0622826	3.09982	0.00193636	0.0192833
ENSMUSG00000069682	Gm10275	19897	5906.36	0.261449	0.0843695	3.09886	0.0019427	0.0193361
ENSMUSG00000057130	Txnl4a	27366	492.052	0.223746	0.072208	3.09864	0.00194414	0.0193402
ENSMUSG00000035778	Ggta1	14594	264.661	0.386384	0.124709	3.09829	0.00194643	0.0193424
ENSMUSG00000064061	Dzip3	224170	4767.82	-0.208454	0.067277	-3.09844	0.00194544	0.0193424
ENSMUSG00000039824	Myl6b	216459	620.242	0.230242	0.0743192	3.09801	0.00194822	0.0193431
ENSMUSG00000030310	Slc6a1	232333	15877	-0.190123	0.0613876	-3.09709	0.00195432	0.0193694
ENSMUSG00000038828	Tmem214	68796	3096.16	0.174594	0.0563714	3.09722	0.00195346	0.0193694
ENSMUSG00000042854	Trp53rkb	76367	215.889	0.205604	0.0663847	3.09715	0.00195389	0.0193694
ENSMUSG00000011960	Ccnt1	12455	2003.66	-0.148403	0.0479198	-3.0969	0.00195558	0.0193716
ENSMUSG00000022305	Lrp12	239393	2331.41	-0.176729	0.0570848	-3.0959	0.00196218	0.0194267
ENSMUSG00000091742	Gm5093	328825	114.237	0.609595	0.196931	3.09547	0.001965	0.0194443
ENSMUSG00000045777	Ifitm10	320802	626.597	0.238067	0.0769127	3.09529	0.00196622	0.0194461
ENSMUSG00000029716	Tfr2	50765	289.28	0.268345	0.0867022	3.09502	0.00196801	0.0194536
ENSMUSG00000022867	Usp25	30940	1459.46	-0.169505	0.0547727	-3.0947	0.00197014	0.0194644
ENSMUSG00000021501	Caml	12328	1122.96	0.119075	0.0384883	3.0938	0.0019761	0.019502
ENSMUSG00000027111	Itga6	16403	941.96	-0.242537	0.0784005	-3.09357	0.00197765	0.019502
ENSMUSG00000047227	Gm527	217648	161.699	-0.255939	0.0827276	-3.09375	0.00197641	0.019502
ENSMUSG00000086006	Gm13293	100503147	97.8075	-0.425701	0.137611	-3.0935	0.00197812	0.019502
ENSMUSG00000035247	Hectd1	207304	5708.98	-0.236071	0.076322	-3.0931	0.00198081	0.0195182
ENSMUSG00000028583	Pdpn	14726	374.915	0.249363	0.080634	3.09252	0.00198462	0.0195227
ENSMUSG00000043964	Orai3	269999	660.192	0.188532	0.0609592	3.09276	0.00198306	0.0195227
ENSMUSG00000062960	Kdr	16542	371.65	-0.440855	0.142551	-3.09262	0.00198397	0.0195227
ENSMUSG00000071713	Csf2rb	12983	85.5545	0.519143	0.167877	3.0924	0.00198543	0.0195227
ENSMUSG00000095524	Gm15682	108169053	205.386	0.345275	0.111658	3.09224	0.00198652	0.0195231
ENSMUSG00000030748	Il4ra	16190	284.353	0.318087	0.102873	3.09204	0.00198784	0.0195259
ENSMUSG00000048279	Sacs	50720	5141.54	-0.209366	0.0677298	-3.0912	0.0019935	0.019561
ENSMUSG00000099471	Gm8451	667090	797.8	0.348397	0.112703	3.09129	0.0019929	0.019561
ENSMUSG00000032518	Rpsa	16785	8239.83	0.276234	0.0894102	3.08951	0.00200485	0.0196621
ENSMUSG00000006527	Sfmbt1	54650	1829.5	-0.12869	0.0416659	-3.08862	0.0020109	0.019711
ENSMUSG00000082626	Rps13-ps5	668239	553.104	0.336772	0.10907	3.08767	0.00201731	0.0197635
ENSMUSG00000058603	Rpl28-ps1	100042670	4395.91	0.33028	0.106999	3.08676	0.0020235	0.0198137
ENSMUSG00000028070	Naxe	246703	1326.63	0.226737	0.0734646	3.08635	0.00202632	0.019831
ENSMUSG00000001833	2021-09-07	235072	15632.1	-0.221164	0.0716649	-3.08609	0.00202808	0.0198379
ENSMUSG00000032175	Tyk2	54721	1008.12	0.204259	0.0661913	3.08589	0.00202942	0.0198406
ENSMUSG00000038637	Lrrc56	70552	194.33	0.191569	0.0620885	3.08542	0.00203265	0.0198618
ENSMUSG00000087370	Tmem170b	621976	3835.11	-0.148249	0.0480508	-3.08526	0.00203373	0.0198621
ENSMUSG00000020273	Papolg	216578	880.012	-0.193773	0.0628305	-3.08406	0.00204195	0.019923
ENSMUSG00000022148	Fyb	23880	108.79	0.400762	0.129949	3.08399	0.00204248	0.019923
ENSMUSG00000024789	Jak2	16452	2138.9	-0.166263	0.0539186	-3.0836	0.0020451	0.019923
ENSMUSG00000034663	Bmp2k	140780	756.98	-0.185452	0.060142	-3.08357	0.0020453	0.019923
ENSMUSG00000038664	Herc1	235439	11204.2	-0.183376	0.0594645	-3.08378	0.00204386	0.019923
ENSMUSG00000000317	Bcl6b	12029	66.1496	-0.417188	0.135348	-3.08234	0.00205381	0.0199445
ENSMUSG00000022568	Scrib	105782	2692.09	0.194951	0.0632525	3.0821	0.00205543	0.0199445
ENSMUSG00000026634	Angel2	52477	2139.45	-0.123455	0.0400475	-3.08271	0.00205126	0.0199445
ENSMUSG00000037977	6430571L13Rik	235599	298.252	-0.255056	0.082747	-3.08235	0.0020537	0.0199445
ENSMUSG00000040321	Zfp770	228491	1173.46	-0.189852	0.0615998	-3.08202	0.00205602	0.0199445
ENSMUSG00000057181	5730455P16Rik	70591	3118.25	-0.185707	0.0602508	-3.08222	0.0020546	0.0199445
ENSMUSG00000081344	Gm14303	629957	57.2674	0.616488	0.200023	3.08208	0.00205557	0.0199445
ENSMUSG00000091387	Gcnt4	218476	542.67	-0.258209	0.083758	-3.0828	0.00205064	0.0199445
ENSMUSG00000001666	Ddt	13202	180.037	0.291717	0.0946788	3.08112	0.00206226	0.0199809
ENSMUSG00000037211	Spry1	24063	287.38	-0.17141	0.0556302	-3.08124	0.00206138	0.0199809
ENSMUSG00000067194	Eif1ax	66235	7663.13	-0.184011	0.0597242	-3.08101	0.00206297	0.0199809
ENSMUSG00000001988	Npas1	18142	511.066	0.251259	0.0815904	3.07952	0.00207336	0.0200607
ENSMUSG00000074748	Atxn7l3b	382423	6539.83	-0.118578	0.0385046	-3.07958	0.0020729	0.0200607
ENSMUSG00000018830	Myh11	17880	170.467	-0.471354	0.153078	-3.07917	0.00207575	0.0200609
ENSMUSG00000029735	Tpk1	29807	101.341	-0.259533	0.084294	-3.0789	0.00207767	0.0200609
ENSMUSG00000037533	Rapgef6	192786	2207.67	-0.1621	0.0526477	-3.07896	0.00207727	0.0200609
ENSMUSG00000063047	Zfp780b	338354	234.536	-0.292034	0.0948415	-3.07918	0.00207571	0.0200609
ENSMUSG00000021133	Susd6	217684	1888.35	-0.199264	0.0647288	-3.07844	0.00208085	0.0200671
ENSMUSG00000026798	Coq4	227683	586.299	0.198357	0.0644307	3.07861	0.00207971	0.0200671
ENSMUSG00000097801	Gm26777	102632019	208.785	-0.228064	0.0740865	-3.07835	0.00208152	0.0200671
ENSMUSG00000048251	Bcl11b	58208	4610.84	-0.203673	0.0661751	-3.0778	0.00208538	0.0200939
ENSMUSG00000027163	Commd9	76501	883.993	0.215071	0.0698967	3.07698	0.0020911	0.0201387
ENSMUSG00000063895	Nupl1	71844	1280.81	-0.227267	0.0738718	-3.0765	0.00209445	0.0201606
ENSMUSG00000034021	Pds5b	100710	5222.35	-0.180025	0.058525	-3.07604	0.00209773	0.0201746
ENSMUSG00000068328	Aup1	11993	1701.79	0.227603	0.0739936	3.07599	0.00209806	0.0201746
ENSMUSG00000001260	Gabrg1	14405	1543.29	-0.256274	0.0833295	-3.07543	0.002102	0.0202021
ENSMUSG00000028018	Gstcd	67553	272.798	-0.206868	0.0673013	-3.07376	0.00211379	0.0203049
ENSMUSG00000032625	Thsd7a	330267	2295.48	-0.234112	0.0761801	-3.07315	0.00211815	0.0203364
ENSMUSG00000022141	Nipbl	71175	2288.17	-0.232454	0.075655	-3.07255	0.00212239	0.0203567
ENSMUSG00000035478	Mbd3	17192	3457.59	0.282138	0.0918257	3.07254	0.00212244	0.0203567
ENSMUSG00000035203	Epn1	13854	13440.1	0.236414	0.07698	3.07111	0.00213265	0.0204241
ENSMUSG00000055629	B4galnt4	330671	3692.05	0.188657	0.0614297	3.0711	0.00213274	0.0204241
ENSMUSG00000021987	Mtmr6	219135	5704.61	-0.173697	0.056563	-3.07086	0.00213442	0.0204297
ENSMUSG00000079555	Haus3	231123	283.96	-0.225631	0.073495	-3.07001	0.00214051	0.0204775
ENSMUSG00000021392	Nol8	70930	1037.48	-0.181925	0.0592754	-3.06914	0.00214673	0.0205221
ENSMUSG00000055639	Dach1	13134	607.198	-0.401817	0.130925	-3.06906	0.00214735	0.0205221
ENSMUSG00000026824	Kcnj3	16519	4445.86	-0.181781	0.0592502	-3.06802	0.0021548	0.0205827
ENSMUSG00000021693	Kif2a	16563	3714.28	-0.140264	0.0457272	-3.0674	0.00215933	0.0206155
ENSMUSG00000070803	Cited4	56222	149.754	0.344305	0.112261	3.06701	0.0021621	0.0206314
ENSMUSG00000032097	Ddx6	13209	9716.27	-0.144043	0.0469737	-3.06646	0.00216607	0.0206587
ENSMUSG00000082536	Gm13456	666531	6131.26	0.130813	0.0426721	3.06555	0.0021727	0.0207115
ENSMUSG00000009535	Rnmt	67897	2850.08	-0.138318	0.0451362	-3.06446	0.00218064	0.0207693
ENSMUSG00000032596	Uba7	74153	172.348	0.344157	0.112313	3.06426	0.0021821	0.0207693
ENSMUSG00000052387	Trpm3	226025	1781.47	-0.325298	0.106156	-3.06434	0.00218154	0.0207693
ENSMUSG00000090707	Gm8237	666684	20.3472	-0.497596	0.162406	-3.06389	0.00218479	0.0207843
ENSMUSG00000014353	Tmem87b	72477	1978.02	-0.131289	0.0428605	-3.06317	0.00219004	0.0208009
ENSMUSG00000022515	Anks3	72615	1766.2	0.132613	0.0432893	3.06342	0.00218825	0.0208009
ENSMUSG00000025794	Rpl14	67115	3009.15	0.299315	0.0977157	3.06312	0.00219042	0.0208009
ENSMUSG00000029202	Pds5a	71521	1461.79	-0.28605	0.0933894	-3.06299	0.0021914	0.0208009
ENSMUSG00000036854	Hspb6	243912	220.605	0.254194	0.0829914	3.06289	0.00219208	0.0208009
ENSMUSG00000040433	Zbtb38	245007	2576.1	-0.175375	0.0572633	-3.06261	0.00219416	0.0208101
ENSMUSG00000050043	Tmx2	66958	4565.35	0.158358	0.0517103	3.06241	0.00219564	0.0208135
ENSMUSG00000012640	Zfp715	69930	1286.46	-0.166128	0.0542564	-3.0619	0.00219933	0.0208171
ENSMUSG00000022752	Tomm70a	28185	9027.83	-0.172645	0.0563812	-3.0621	0.00219789	0.0208171
ENSMUSG00000042271	Nxt2	237082	1387.7	-0.207012	0.0676089	-3.0619	0.00219935	0.0208171
ENSMUSG00000041268	Dmxl2	235380	10627.4	-0.224099	0.0732078	-3.06113	0.00220502	0.0208603
ENSMUSG00000041935	AW549877	106064	3658.68	-0.188013	0.0614258	-3.06082	0.00220734	0.0208716
ENSMUSG00000024887	Asah2	54447	805.919	-0.291097	0.095125	-3.06015	0.00221224	0.0209012
ENSMUSG00000053289	Ddx10	77591	895.003	-0.130007	0.0424846	-3.06009	0.0022127	0.0209012
ENSMUSG00000032908	Sgpp2	433323	1004.16	-0.245248	0.0801492	-3.0599	0.00221413	0.0209041
ENSMUSG00000042104	Uggt2	66435	1653.55	-0.245342	0.0801852	-3.05969	0.00221563	0.0209078
ENSMUSG00000025656	Arhgef9	236915	16616.6	-0.165672	0.0541553	-3.05921	0.00221921	0.0209291
ENSMUSG00000029816	Gpnmb	93695	193.174	0.756828	0.247421	3.05887	0.00222175	0.0209291
ENSMUSG00000039476	Prrx2	20204	33.2339	0.562725	0.183953	3.05907	0.00222024	0.0209291
ENSMUSG00000042766	Trim46	360213	3533.51	0.167683	0.05482	3.05879	0.00222236	0.0209291
ENSMUSG00000047412	Zbtb44	235132	1610.38	-0.161929	0.0529453	-3.05842	0.0022251	0.0209443
ENSMUSG00000014773	Dll1	13388	211.504	-0.223833	0.0732171	-3.05711	0.0022348	0.021004
ENSMUSG00000052632	Asap2	211914	1638.28	-0.193085	0.063158	-3.05717	0.00223434	0.021004
ENSMUSG00000055531	Cpsf6	432508	5378.31	-0.186533	0.0610143	-3.0572	0.00223415	0.021004
ENSMUSG00000026811	St6galnac6	50935	4442.32	0.144007	0.0471136	3.0566	0.0022386	0.0210197
ENSMUSG00000036748	Cuedc2	67116	3554.97	0.242629	0.079383	3.05644	0.00223984	0.0210197
ENSMUSG00000062488	Ifit3b	667370	154.131	0.386146	0.126338	3.05646	0.00223969	0.0210197
ENSMUSG00000055733	Nap1l3	54561	2363.71	-0.197169	0.0645158	-3.05614	0.00224207	0.0210301
ENSMUSG00000022762	Ncam2	17968	1895.66	-0.403383	0.13202	-3.05547	0.00224709	0.0210666
ENSMUSG00000064289	Tank	21353	1049.67	-0.184068	0.0602617	-3.05448	0.00225451	0.0211256
ENSMUSG00000045629	Sh3tc2	225608	149.025	-0.27391	0.0896942	-3.05382	0.00225948	0.0211616
ENSMUSG00000007812	Zfp655	72611	1445.32	-0.17091	0.0559887	-3.05258	0.00226881	0.0212384
ENSMUSG00000034518	Hmgxb4	70823	785.036	-0.121727	0.0398949	-3.05119	0.00227936	0.0213264
ENSMUSG00000049751	Rpl36al	66483	2097.99	0.247681	0.0811908	3.05061	0.00228378	0.0213572
ENSMUSG00000081895	Rpl17-ps10	100042880	24.2187	0.566231	0.185632	3.05028	0.00228625	0.0213695
ENSMUSG00000044221	Grsf1	231413	3732.07	-0.116116	0.0380786	-3.04939	0.0022931	0.0214153
ENSMUSG00000050714	Zbtb26	320633	449.314	-0.210381	0.0689956	-3.04919	0.00229458	0.0214153
ENSMUSG00000074505	Fat3	270120	4795.96	-0.219783	0.0720766	-3.0493	0.00229373	0.0214153
ENSMUSG00000075415	Fnbp1	14269	7313.94	-0.168476	0.0552658	-3.04846	0.00230014	0.0214566
ENSMUSG00000021033	Gstz1	14874	1365.27	0.162001	0.0531609	3.04738	0.00230846	0.0215026
ENSMUSG00000026156	B3gat2	280645	355.544	-0.196822	0.0645876	-3.04737	0.00230853	0.0215026
ENSMUSG00000034930	Rtkn	20166	671.014	-0.145615	0.0477835	-3.04739	0.00230838	0.0215026
ENSMUSG00000031996	Aplp2	11804	21324.5	-0.174022	0.0571108	-3.04709	0.00231065	0.0215117
ENSMUSG00000028876	Epha10	230735	2936.13	0.218729	0.0717901	3.04679	0.00231298	0.0215226
ENSMUSG00000027004	Frzb	20378	789.393	-0.32319	0.106108	-3.04585	0.00232023	0.0215791
ENSMUSG00000061132	Blnk	17060	302.998	0.349068	0.11461	3.04571	0.00232135	0.0215791
ENSMUSG00000031754	Nudt21	68219	1111.45	-0.214347	0.0703823	-3.04547	0.00232319	0.0215855
ENSMUSG00000020388	Pdlim4	30794	308.292	0.278359	0.0914385	3.04422	0.00233281	0.021646
ENSMUSG00000022280	Rnf19a	30945	1515	-0.13023	0.042782	-3.04403	0.00233432	0.021646
ENSMUSG00000022723	Crybg3	224273	323.255	-0.290271	0.0953539	-3.04415	0.00233341	0.021646
ENSMUSG00000025351	Cd63	12512	2390.34	0.276253	0.0907433	3.04433	0.00233197	0.021646
ENSMUSG00000025702	2021-03-08	71779	2821.22	-0.123456	0.0405603	-3.04377	0.00233634	0.021654
ENSMUSG00000046432	Bex3	12070	4991.04	0.209881	0.0689578	3.04361	0.00233759	0.0216548
ENSMUSG00000053580	Tanc2	77097	8965.92	-0.171844	0.0564753	-3.04281	0.00234378	0.0216906
ENSMUSG00000070544	Top1	21969	3617.37	-0.172425	0.0566662	-3.04281	0.00234377	0.0216906
ENSMUSG00000027366	Sppl2a	66552	2445.59	-0.19363	0.0636687	-3.04122	0.00235622	0.0217908
ENSMUSG00000032405	Pias1	56469	1822.27	-0.214416	0.0705087	-3.04098	0.00235809	0.0217908
ENSMUSG00000042688	Mapk6	50772	2874.94	-0.166336	0.0546959	-3.0411	0.00235714	0.0217908
ENSMUSG00000018417	Myo1b	17912	1758.24	-0.165111	0.0543022	-3.04059	0.00236112	0.021808
ENSMUSG00000034780	B3galt1	26877	1864.49	-0.200075	0.065806	-3.04037	0.00236284	0.0218131
ENSMUSG00000031848	Lsm4	50783	1038.99	0.256808	0.0844745	3.04007	0.00236525	0.0218246
ENSMUSG00000057863	Rpl36	54217	2902.63	0.287405	0.0945492	3.03974	0.00236781	0.0218375
ENSMUSG00000029238	Clock	12753	3258.13	-0.25143	0.0827216	-3.03948	0.0023699	0.021846
ENSMUSG00000020778	Ten1	69535	549.321	0.212001	0.0697792	3.03817	0.00238021	0.0219303
ENSMUSG00000042323	Pbrm1	66923	2831.56	-0.163025	0.0536703	-3.03753	0.00238525	0.0219659
ENSMUSG00000003873	Bax	12028	1087.58	0.234643	0.0772636	3.03692	0.00239012	0.0219852
ENSMUSG00000010803	Gabra1	14394	16064	-0.242538	0.0798697	-3.03667	0.00239204	0.0219852
ENSMUSG00000014767	Tbp	21374	1108.16	-0.140175	0.0461575	-3.0369	0.00239029	0.0219852
ENSMUSG00000034112	Atp2c2	69047	57.3089	0.648705	0.213621	3.0367	0.0023918	0.0219852
ENSMUSG00000059811	Atl2	56298	2556.54	-0.130192	0.042882	-3.03604	0.00239704	0.0220203
ENSMUSG00000042129	Rassf4	213391	661.246	-0.303617	0.10001	-3.03588	0.00239839	0.0220219
ENSMUSG00000024231	Cul2	71745	2441.51	-0.174386	0.0574479	-3.03555	0.00240096	0.0220347
ENSMUSG00000051723	Rpl31-ps13	100504277	998.632	0.396116	0.130502	3.03532	0.00240282	0.022041
ENSMUSG00000038518	Jarid2	16468	1776.9	-0.107128	0.035301	-3.03469	0.00240782	0.022076
ENSMUSG00000054640	Slc8a1	20541	1574.4	-0.388716	0.128158	-3.03311	0.00242051	0.0221815
[truncated: 30,572 more rows]
