# Supplementary material for: Microglia show differential transcriptomic response to Aβ peptide aggregates ex vivo and in vivo
Source: Life Sci Alliance. 2021 Jun 14;4(7):e202101108. doi: 10.26508/lsa.202101108 (PMC8321667; doi:10.26508/lsa.202101108)
Supplement: Supplementary file 41 [file LSA-2021-01108_TableS41.xlsx]

## Sheet: Sheet1
category	ontology	term	over_represented_pvalue	BHadjust	numDEInCat	numInCat	totalDEG	totalNum	enrichment
GO:0004726	MF	non-membrane spanning protein tyrosine phosphatase activity	0.0497033	0.70704	1	6	187	21152	18.852
GO:0005534	MF	galactose binding	0.0422404	0.63066	1	6	187	21152	18.852
GO:0004859	MF	phospholipase inhibitor activity	0.0394067	0.614466	1	6	187	21152	18.852
GO:0019863	MF	IgE binding	0.000651512	0.0252139	2	6	187	21152	37.7041
GO:0023026	MF	MHC class II protein complex binding	7.70616e-06	0.000581453	3	6	187	21152	56.5561
GO:0031730	MF	CCR5 chemokine receptor binding	0.0498063	0.707058	1	7	187	21152	16.1589
GO:0045236	MF	CXCR chemokine receptor binding	0.0467423	0.684285	1	7	187	21152	16.1589
GO:0005384	MF	manganese ion transmembrane transporter activity	0.00145263	0.0486748	2	7	187	21152	32.3178
GO:0071723	MF	lipopeptide binding	1.7622e-05	0.00120241	3	7	187	21152	48.4767
GO:0042609	MF	CD4 receptor binding	0.00181988	0.0584571	2	8	187	21152	28.2781
GO:0016176	MF	superoxide-generating NADPH oxidase activator activity	0.00178305	0.0578014	2	8	187	21152	28.2781
GO:0042289	MF	MHC class II protein binding	0.00167195	0.0547218	2	8	187	21152	28.2781
GO:0019864	MF	IgG binding	2.09119e-05	0.00138703	3	8	187	21152	42.4171
GO:0019763	MF	immunoglobulin receptor activity	1.92704e-05	0.00128969	3	8	187	21152	42.4171
GO:0016175	MF	superoxide-generating NADPH oxidase activity	0.00218132	0.0673722	2	9	187	21152	25.1361
GO:0033691	MF	sialic acid binding	0.00216437	0.067218	2	9	187	21152	25.1361
GO:0034987	MF	immunoglobulin receptor binding	3.67721e-05	0.00230955	3	9	187	21152	37.7041
GO:0023023	MF	MHC protein complex binding	9.01229e-05	0.00482479	3	12	187	21152	28.2781
GO:0035325	MF	Toll-like receptor binding	0.000138565	0.00706494	3	14	187	21152	24.2383
GO:0001848	MF	complement binding	0.000648691	0.025148	3	22	187	21152	15.4244
GO:0019865	MF	immunoglobulin binding	2.23569e-05	0.00146987	4	22	187	21152	20.5659
GO:0001530	MF	lipopolysaccharide binding	0.00105073	0.0371473	3	26	187	21152	13.0514
GO:0043027	MF	cysteine-type endopeptidase inhibitor activity involved in apoptotic process	2.50886e-06	0.000227467	5	28	187	21152	20.1986
GO:0042287	MF	MHC protein binding	0.0221791	0.41308	2	29	187	21152	7.80085
GO:0043236	MF	laminin binding	0.00199376	0.0627867	3	31	187	21152	10.9464
GO:0016504	MF	peptidase activator activity	0.0275923	0.478344	2	32	187	21152	7.06952
GO:0017080	MF	sodium channel regulator activity	0.0271172	0.471563	2	33	187	21152	6.85529
GO:0046915	MF	transition metal ion transmembrane transporter activity	0.034885	0.561884	2	35	187	21152	6.46356
GO:0042169	MF	SH2 domain binding	0.0404862	0.624371	2	38	187	21152	5.95328
GO:0043028	MF	cysteine-type endopeptidase regulator activity involved in apoptotic process	1.3677e-05	0.00096707	5	39	187	21152	14.5016
GO:0042056	MF	chemoattractant activity	0.0270976	0.471563	2	40	187	21152	5.65561
GO:0008009	MF	chemokine activity	2.08912e-07	2.63899e-05	6	40	187	21152	16.9668
GO:0005547	MF	phosphatidylinositol-3,4,5-trisphosphate binding	0.0457975	0.674808	2	41	187	21152	5.51767
GO:0032266	MF	phosphatidylinositol-3-phosphate binding	0.0442837	0.656807	2	41	187	21152	5.51767
GO:0048020	MF	CCR chemokine receptor binding	8.49067e-05	0.00461142	4	43	187	21152	10.5221
GO:0001540	MF	amyloid-beta binding	0.000101481	0.00535635	5	58	187	21152	9.75106
GO:0004869	MF	cysteine-type endopeptidase inhibitor activity	4.88646e-06	0.000402462	6	62	187	21152	10.9464
GO:0042379	MF	chemokine receptor binding	2.18187e-06	0.000200242	6	63	187	21152	10.7726
GO:0048365	MF	Rac GTPase binding	0.0182893	0.350285	3	67	187	21152	5.06473
GO:0038024	MF	cargo receptor activity	0.00335492	0.0963414	4	74	187	21152	6.11418
GO:0004197	MF	cysteine-type endopeptidase activity	0.0427192	0.63612	3	95	187	21152	3.57197
GO:0004725	MF	protein tyrosine phosphatase activity	0.0456107	0.673794	3	96	187	21152	3.53476
GO:0004896	MF	cytokine receptor activity	0.00117386	0.0406065	5	96	187	21152	5.89127
GO:0015294	MF	solute:cation symporter activity	0.0498452	0.707111	3	98	187	21152	3.46262
GO:0140375	MF	immune receptor activity	3.64023e-07	4.30792e-05	9	113	187	21152	9.00894
GO:0017124	MF	SH3 domain binding	0.0221926	0.41308	4	128	187	21152	3.53476
GO:1901981	MF	phosphatidylinositol phosphate binding	0.0467115	0.684285	4	163	187	21152	2.77576
GO:0004866	MF	endopeptidase inhibitor activity	1.3069e-06	0.000131774	10	190	187	21152	5.95328
GO:0061135	MF	endopeptidase regulator activity	1.85222e-06	0.000178743	10	197	187	21152	5.74174
GO:0005539	MF	glycosaminoglycan binding	0.00113954	0.0397249	7	201	187	21152	3.93923
GO:0030414	MF	peptidase inhibitor activity	2.03641e-06	0.000191584	10	201	187	21152	5.62748
GO:0005125	MF	cytokine activity	0.000591788	0.0232629	7	209	187	21152	3.78845
GO:0022853	MF	active ion transmembrane transporter activity	0.036615	0.583479	5	219	187	21152	2.58247
GO:0061134	MF	peptidase regulator activity	1.16742e-06	0.000119315	11	232	187	21152	5.36308
GO:1901681	MF	sulfur compound binding	0.0412572	0.625373	5	241	187	21152	2.34673
GO:0030246	MF	carbohydrate binding	0.0194131	0.369293	6	268	187	21152	2.53236
GO:0001664	MF	G protein-coupled receptor binding	0.0199574	0.378686	6	289	187	21152	2.34835
GO:0042277	MF	peptide binding	0.00225267	0.0689132	8	289	187	21152	3.13114
GO:0005126	MF	cytokine receptor binding	0.000494807	0.0204894	9	323	187	21152	3.15174
GO:0033218	MF	amide binding	0.00211441	0.0658485	9	353	187	21152	2.88388
GO:0004857	MF	enzyme inhibitor activity	0.000106283	0.00558359	11	370	187	21152	3.3628
GO:0005543	MF	phospholipid binding	0.0210096	0.394653	8	414	187	21152	2.18574
GO:0008047	MF	enzyme activator activity	0.0287241	0.493777	8	446	187	21152	2.02892
GO:0048018	MF	receptor ligand activity	0.0015806	0.0522253	10	475	187	21152	2.38131
GO:0030546	MF	signaling receptor activator activity	0.000479884	0.0199818	11	481	187	21152	2.58677
GO:0030545	MF	receptor regulator activity	0.00080206	0.0297596	11	508	187	21152	2.44928
GO:0008289	MF	lipid binding	0.000270923	0.0124575	16	736	187	21152	2.45896
GO:0030234	MF	enzyme regulator activity	0.000157327	0.00793163	19	943	187	21152	2.27904
GO:0044877	MF	protein-containing complex binding	0.00222807	0.0683469	20	1232	187	21152	1.83624
GO:0005102	MF	signaling receptor binding	3.15986e-05	0.00202971	28	1594	187	21152	1.98692
GO:0098772	MF	molecular function regulator	1.53015e-07	2.01762e-05	34	1699	187	21152	2.26358
GO:0005515	MF	protein binding	3.95674e-05	0.00245766	95	8689	187	21152	1.2367
GO:0005488	MF	binding	0.00216821	0.0672445	120	12816	187	21152	1.0591
