# Supplementary material for: Microglia show differential transcriptomic response to Aβ peptide aggregates ex vivo and in vivo
Source: Life Sci Alliance. 2021 Jun 14;4(7):e202101108. doi: 10.26508/lsa.202101108 (PMC8321667; doi:10.26508/lsa.202101108)
Supplement: Supplementary file 42 [file LSA-2021-01108_TableS42.xlsx]

## Sheet: Sheet1
category	ontology	term	over_represented_pvalue	BHadjust	numDEInCat	numInCat	totalDEG	totalNum	enrichment
GO:0042054	MF	histone methyltransferase activity	0.00512001	1	3	55	105	21152	10.9881
GO:0005254	MF	chloride channel activity	0.00566763	1	3	67	105	21152	9.02004
GO:0019199	MF	transmembrane receptor protein kinase activity	0.0137581	1	3	75	105	21152	8.0579
GO:0004713	MF	protein tyrosine kinase activity	0.00373999	1	5	129	105	21152	7.80805
GO:0005253	MF	anion channel activity	0.00887351	1	3	78	105	21152	7.74799
GO:0008276	MF	protein methyltransferase activity	0.0108533	1	3	82	105	21152	7.37003
GO:0008170	MF	N-methyltransferase activity	0.0113183	1	3	84	105	21152	7.19456
GO:0015108	MF	chloride transmembrane transporter activity	0.0153226	1	3	94	105	21152	6.42918
GO:0008238	MF	exopeptidase activity	0.0128865	1	3	99	105	21152	6.10447
GO:0030594	MF	neurotransmitter receptor activity	0.0257932	1	3	117	105	21152	5.16532
GO:0015103	MF	inorganic anion transmembrane transporter activity	0.0337072	1	3	127	105	21152	4.75861
GO:0005319	MF	lipid transporter activity	0.0338882	1	3	134	105	21152	4.51002
GO:0008528	MF	G protein-coupled peptide receptor activity	0.0215943	1	3	139	105	21152	4.34779
GO:0008757	MF	S-adenosylmethionine-dependent methyltransferase activity	0.0379248	1	3	142	105	21152	4.25594
GO:0005342	MF	organic acid transmembrane transporter activity	0.038813	1	3	146	105	21152	4.13933
GO:0046943	MF	carboxylic acid transmembrane transporter activity	0.038813	1	3	146	105	21152	4.13933
GO:0001653	MF	peptide receptor activity	0.0270341	1	3	148	105	21152	4.0834
GO:0008514	MF	organic anion transmembrane transporter activity	0.0199092	1	4	202	105	21152	3.98906
GO:0008509	MF	anion transmembrane transporter activity	0.0063426	1	6	314	105	21152	3.84932
GO:0004930	MF	G protein-coupled receptor activity	0.00109443	1	11	716	105	21152	3.09487
GO:0005509	MF	calcium ion binding	0.0252677	1	8	606	105	21152	2.65937
GO:0140096	MF	catalytic activity, acting on a protein	0.0338439	1	18	2136	105	21152	1.69759
GO:0004888	MF	transmembrane signaling receptor activity	0.0326759	1	16	1991	105	21152	1.61887
GO:0060089	MF	molecular transducer activity	0.0353024	1	17	2162	105	21152	1.584
GO:0038023	MF	signaling receptor activity	0.0353024	1	17	2162	105	21152	1.584
