# Supplementary material for: Microglia show differential transcriptomic response to Aβ peptide aggregates ex vivo and in vivo
Source: Life Sci Alliance. 2021 Jun 14;4(7):e202101108. doi: 10.26508/lsa.202101108 (PMC8321667; doi:10.26508/lsa.202101108)
Supplement: Supplementary file 43 [file LSA-2021-01108_TableS43.xlsx]

## Sheet: Sheet1
category	pathway_name	over_represented_pvalue	BHadjust	numDEInCat	numInCat	totalDEG	totalNum	enrichment
5150	Staphylococcus aureus infection	7.21977e-11	1.62445e-08	10	50	187	6309	6.74759
5140	Leishmaniasis	2.7386e-08	3.08092e-06	9	64	187	6309	4.7444
5310	Asthma	0.00120664	0.0246813	3	23	187	6309	4.4006
5322	Systemic lupus erythematosus	6.86498e-07	3.86155e-05	8	85	187	6309	3.17534
4610	Complement and coagulation cascades	1.79882e-05	0.000791922	7	75	187	6309	3.14888
5020	Prion disease	0.0066935	0.071716	3	35	187	6309	2.89183
4145	Phagosome	2.29303e-07	1.71978e-05	12	167	187	6309	2.42429
4621	NOD-like receptor signaling pathway	0.00386473	0.0483091	4	56	187	6309	2.40985
4620	Toll-like receptor signaling pathway	9.47767e-05	0.00236942	7	101	187	6309	2.33828
4650	Natural killer cell mediated cytotoxicity	3.50186e-05	0.00108078	8	120	187	6309	2.2492
4662	B cell receptor signaling pathway	0.00173724	0.0297796	5	75	187	6309	2.2492
5323	Rheumatoid arthritis	0.00179555	0.0297796	5	81	187	6309	2.08259
4640	Hematopoietic cell lineage	0.00194307	0.0297796	5	81	187	6309	2.08259
4380	Osteoclast differentiation	0.000345424	0.00777204	7	116	187	6309	2.03591
4666	Fc gamma R-mediated phagocytosis	0.00358424	0.0474385	5	88	187	6309	1.91693
4062	Chemokine signaling pathway	2.11179e-05	0.000791922	10	177	187	6309	1.9061
4612	Antigen processing and presentation	0.00823378	0.0842092	4	74	187	6309	1.82367
4670	Leukocyte transendothelial migration	0.00198531	0.0297796	6	118	187	6309	1.71549
5142	Chagas disease	0.00546612	0.0614938	5	100	187	6309	1.6869
4142	Lysosome	0.00274265	0.0385686	6	122	187	6309	1.65924
4060	Cytokine-cytokine receptor interaction	3.84279e-05	0.00108078	11	243	187	6309	1.52723
4514	Cell adhesion molecules	0.00541562	0.0614938	6	145	187	6309	1.39605
