# Supplementary material for: Microglia show differential transcriptomic response to Aβ peptide aggregates ex vivo and in vivo
Source: Life Sci Alliance. 2021 Jun 14;4(7):e202101108. doi: 10.26508/lsa.202101108 (PMC8321667; doi:10.26508/lsa.202101108)
Supplement: Supplementary file 45 [file LSA-2021-01108_TableS45.xlsx]

## Sheet: 1_DEGs_Tg_v_nTg_12mon
GeneStableID	symbol	entrezid	baseMean	log2FoldChange	lfcSE	stat	pvalue	padj
ENSMUSG00000068129	Cst7	13011	213.32	5.95157	0.303616	19.6023	1.47895e-85	3.0879e-81
ENSMUSG00000024737	Slc15a3	65221	131.589	1.92058	0.121613	15.7926	3.50053e-56	3.65438e-52
ENSMUSG00000030579	Tyrobp	22177	819.29	2.12398	0.136232	15.5909	8.38784e-55	5.83765e-51
ENSMUSG00000018774	Cd68	12514	466.053	1.63986	0.106643	15.3771	2.33219e-53	1.17063e-49
ENSMUSG00000023992	Trem2	83433	911.571	1.90117	0.123732	15.3652	2.80337e-53	1.17063e-49
ENSMUSG00000000982	Ccl3	20302	32.2799	4.13433	0.27819	14.8616	5.85541e-50	2.03759e-46
ENSMUSG00000079293	Clec7a	56644	92.1886	4.35579	0.296357	14.6978	6.66158e-49	1.98696e-45
ENSMUSG00000041515	Irf8	15900	296.203	1.26867	0.0883367	14.3617	8.99408e-47	2.34734e-43
ENSMUSG00000043008	Klhl6	239743	83.3069	1.60916	0.124116	12.965	1.93233e-38	4.48279e-35
ENSMUSG00000016256	Ctsz	64138	1662.27	1.14821	0.0898836	12.7744	2.27796e-37	4.75615e-34
ENSMUSG00000007891	Ctsd	13033	16551	1.09212	0.0871286	12.5346	4.82805e-36	8.40041e-33
ENSMUSG00000030789	Itgax	16411	154.676	3.44704	0.274975	12.5359	4.75229e-36	8.40041e-33
ENSMUSG00000040552	C3ar1	12267	154.812	1.77304	0.142453	12.4465	1.46162e-35	2.34747e-32
ENSMUSG00000020932	Gfap	14580	18197.9	2.24571	0.181373	12.3817	3.28276e-35	4.89577e-32
ENSMUSG00000031995	St14	19143	67.6183	1.91449	0.156056	12.268	1.34567e-34	1.87308e-31
ENSMUSG00000046805	Mpeg1	17476	1487.98	1.69075	0.140856	12.0034	3.41169e-33	4.45204e-30
ENSMUSG00000028581	Laptm5	16792	1712.83	1.11013	0.0925518	11.9946	3.7905e-33	4.6554e-30
ENSMUSG00000028859	Csf3r	12986	424.479	1.22089	0.103534	11.7922	4.28141e-32	4.9662e-29
ENSMUSG00000038204	Asb10	117590	20.7984	2.68001	0.228762	11.7153	1.06414e-31	1.16938e-28
ENSMUSG00000006519	Cyba	13057	235.677	1.25561	0.108982	11.5212	1.03114e-30	1.07646e-27
ENSMUSG00000025534	Gusb	110006	758.517	0.632477	0.0552303	11.4516	2.30793e-30	2.29463e-27
ENSMUSG00000021423	Ly86	17084	407.135	1.36711	0.120915	11.3064	1.22007e-29	1.1579e-26
ENSMUSG00000063234	Gpr84	80910	48.8013	1.90485	0.170302	11.1852	4.82086e-29	4.37629e-26
ENSMUSG00000022876	Samsn1	67742	71.6213	1.47662	0.132114	11.1768	5.29487e-29	4.60632e-26
ENSMUSG00000058715	Fcer1g	14127	312.17	1.37172	0.123278	11.1271	9.26396e-29	7.43932e-26
ENSMUSG00000018930	Ccl4	20303	16.0259	3.78422	0.34177	11.0724	1.70726e-28	1.32022e-25
ENSMUSG00000018927	Ccl6	20305	91.6746	2.61601	0.23799	10.9921	4.17293e-28	3.11167e-25
ENSMUSG00000020120	Plek	56193	864.937	0.885845	0.081106	10.9221	9.04129e-28	6.50942e-25
ENSMUSG00000073418	C4b	12268	4542.82	1.9011	0.17505	10.8603	1.78105e-27	1.23955e-24
ENSMUSG00000020101	Vsir	74048	1284.26	0.696041	0.0642388	10.8352	2.34415e-27	1.57882e-24
ENSMUSG00000020399	Havcr2	171285	149.394	1.10276	0.102306	10.7791	4.32216e-27	2.82008e-24
ENSMUSG00000025232	Hexa	15211	2178.26	0.613513	0.0576175	10.648	1.78085e-26	1.12674e-23
ENSMUSG00000004266	Ptpn6	15170	160.707	1.12672	0.10648	10.5816	3.62822e-26	2.22805e-23
ENSMUSG00000035778	Ggta1	14594	264.661	1.29622	0.122936	10.5439	5.41945e-26	3.23293e-23
ENSMUSG00000026786	Apbb1ip	54519	231.345	0.886356	0.0845514	10.483	1.03364e-25	5.98183e-23
ENSMUSG00000038147	Cd84	12523	152.539	1.58344	0.151082	10.4807	1.06005e-25	5.98183e-23
ENSMUSG00000052688	Rab7b	226421	83.9821	1.51945	0.146115	10.399	2.5048e-25	1.37626e-22
ENSMUSG00000029925	Tbxas1	21391	120.02	1.20854	0.116598	10.365	3.57724e-25	1.91511e-22
ENSMUSG00000052336	Cx3cr1	13051	1837.38	0.772021	0.0755761	10.2152	1.69612e-24	8.85333e-22
ENSMUSG00000053158	Fes	14159	196.669	0.93923	0.0923073	10.175	2.56316e-24	1.30527e-21
ENSMUSG00000045502	Hcar2	80885	20.5842	3.7078	0.368157	10.0712	7.40322e-24	3.68028e-21
ENSMUSG00000038642	Ctss	13040	2766.14	0.996367	0.0991145	10.0527	8.93933e-24	4.34057e-21
ENSMUSG00000026177	Slc11a1	18173	152.104	1.36352	0.136273	10.0058	1.43724e-23	6.82002e-21
ENSMUSG00000004707	Ly9	17085	46.0515	2.18348	0.219028	9.96893	2.08454e-23	9.67179e-21
ENSMUSG00000030798	Cd37	12493	232.639	1.06559	0.107054	9.95373	2.42912e-23	1.10256e-20
ENSMUSG00000049625	Tifab	212937	153.831	1.06735	0.108242	9.86083	6.15413e-23	2.73387e-20
ENSMUSG00000018008	Cyth4	72318	571.996	0.802752	0.0819839	9.79159	1.22358e-22	5.32232e-20
ENSMUSG00000022831	Hcls1	15163	206.578	0.901186	0.0926143	9.73054	2.23415e-22	9.51975e-20
ENSMUSG00000036887	C1qa	12259	2089.33	1.19432	0.123289	9.6871	3.42099e-22	1.42854e-19
ENSMUSG00000000682	Cd52	23833	100.454	1.92043	0.198337	9.68264	3.57351e-22	1.46297e-19
ENSMUSG00000029484	Anxa3	11745	377.651	1.09239	0.112906	9.6752	3.84346e-22	1.54322e-19
ENSMUSG00000040747	Cd53	12508	319.555	0.935326	0.0967489	9.66756	4.14126e-22	1.63142e-19
ENSMUSG00000034936	Arl4d	80981	587.571	-1.20105	0.126431	-9.49962	2.10667e-21	8.14541e-19
ENSMUSG00000022146	Osmr	18414	281.387	1.44744	0.152452	9.49436	2.21573e-21	8.4113e-19
ENSMUSG00000026285	Pdcd1	18566	23.2188	2.534	0.268082	9.45231	3.31428e-21	1.21402e-18
ENSMUSG00000037686	Aspg	104816	338.4	1.57119	0.1662	9.45365	3.27214e-21	1.21402e-18
ENSMUSG00000032122	Slc37a2	56857	196.539	0.818165	0.0870158	9.40249	5.32843e-21	1.91814e-18
ENSMUSG00000029622	Arpc1b	11867	721.439	0.774855	0.0825872	9.38227	6.45701e-21	2.28502e-18
ENSMUSG00000030124	Lag3	16768	284.137	1.09992	0.117296	9.37728	6.76986e-21	2.3558e-18
ENSMUSG00000056737	Capg	12332	112.353	1.88001	0.201741	9.31891	1.17538e-20	4.02307e-18
ENSMUSG00000051212	Gpr183	321019	65.9917	1.12497	0.121145	9.28615	1.59967e-20	5.38702e-18
ENSMUSG00000044468	Tent5c	74645	226.501	1.16644	0.12574	9.2766	1.74971e-20	5.79876e-18
ENSMUSG00000021624	Cd180	17079	114.126	1.74678	0.188709	9.25646	2.11332e-20	6.89436e-18
ENSMUSG00000069516	Lyz2	17105	896.851	1.91282	0.206847	9.24754	2.29723e-20	7.37905e-18
ENSMUSG00000097415	AU020206	100504230	76.974	1.41577	0.156065	9.07171	1.17166e-19	3.70651e-17
ENSMUSG00000029919	Hpgds	54486	333.885	0.759692	0.0844261	8.99831	2.29214e-19	7.14292e-17
ENSMUSG00000021091	Serpina3n	20716	1353.06	1.63463	0.183094	8.92784	4.34404e-19	1.33381e-16
ENSMUSG00000024300	Myo1f	17916	201.217	1.09089	0.12243	8.91029	5.09012e-19	1.54024e-16
ENSMUSG00000003545	Fosb	14282	620.587	-1.45008	0.16427	-8.82742	1.07122e-18	3.19514e-16
ENSMUSG00000052142	Rasal3	320484	178.206	0.946375	0.107504	8.80318	1.32993e-18	3.91093e-16
ENSMUSG00000026480	Ncf2	17970	192.176	0.695505	0.0791497	8.78721	1.53319e-18	4.44603e-16
ENSMUSG00000005373	Mlxipl	58805	166.727	0.917779	0.106125	8.64806	5.23832e-18	1.49823e-15
ENSMUSG00000007041	Clic1	114584	361.42	0.776747	0.0900328	8.62737	6.27769e-18	1.72463e-15
ENSMUSG00000018920	Cxcl16	66102	92.3155	1.05908	0.122722	8.62993	6.13907e-18	1.72463e-15
ENSMUSG00000040528	Milr1	380732	20.232	1.72194	0.19958	8.62784	6.25215e-18	1.72463e-15
ENSMUSG00000021822	Plau	18792	152.235	1.13749	0.132375	8.59297	8.47494e-18	2.29803e-15
ENSMUSG00000021242	Npc2	67963	2392.84	0.539079	0.0631724	8.53345	1.42042e-17	3.80217e-15
ENSMUSG00000002111	Spi1	20375	128.768	0.842867	0.0988238	8.529	1.47624e-17	3.90156e-15
ENSMUSG00000032440	Tgfbr2	21813	787.063	0.735757	0.0863961	8.51609	1.65026e-17	4.30696e-15
ENSMUSG00000053175	Bcl3	12051	31.965	2.16745	0.255511	8.48281	2.19818e-17	5.66614e-15
ENSMUSG00000036896	C1qc	12262	1372.9	1.05387	0.124811	8.44372	3.07401e-17	7.82711e-15
ENSMUSG00000078945	Naip2	17948	67.9491	1.15465	0.137193	8.41626	3.88711e-17	9.77818e-15
ENSMUSG00000026548	Slamf9	98365	53.0229	1.72234	0.205112	8.39707	4.57764e-17	1.13782e-14
ENSMUSG00000030342	Cd9	12527	1325.73	0.855538	0.101954	8.39143	4.80246e-17	1.17965e-14
ENSMUSG00000055541	Lair1	52855	330.514	0.63003	0.0754562	8.34961	6.84895e-17	1.66278e-14
ENSMUSG00000059336	Slc14a1	108052	669.347	0.871159	0.104737	8.31761	8.97553e-17	2.15402e-14
ENSMUSG00000030263	Lrmp	16970	93.6478	0.860564	0.103855	8.28621	1.16911e-16	2.77384e-14
ENSMUSG00000030505	Prmt3	71974	656.357	-0.536603	0.0652992	-8.2176	2.07614e-16	4.87053e-14
ENSMUSG00000001751	Naglu	27419	378.805	0.599677	0.073108	8.20262	2.35198e-16	5.45633e-14
ENSMUSG00000034855	Cxcl10	15945	24.4995	2.65147	0.323718	8.19069	2.59739e-16	5.95945e-14
ENSMUSG00000071203	Naip5	17951	92.3671	1.17902	0.144208	8.17583	2.93841e-16	6.66858e-14
ENSMUSG00000026395	Ptprc	19264	248.527	1.09917	0.134837	8.15183	3.58455e-16	8.04752e-14
ENSMUSG00000035697	Arhgap45	70719	403.238	0.818308	0.100418	8.149	3.66935e-16	8.15024e-14
ENSMUSG00000036908	Unc93b1	54445	535.007	0.695613	0.0855628	8.12986	4.29778e-16	9.44562e-14
ENSMUSG00000027995	Tlr2	24088	90.4048	1.25372	0.155186	8.07887	6.53709e-16	1.42175e-13
ENSMUSG00000043157	Arl11	219144	27.9384	1.52055	0.188507	8.06626	7.24831e-16	1.56018e-13
ENSMUSG00000044811	Cd300c2	140497	148.432	0.987359	0.122465	8.06236	7.48372e-16	1.59441e-13
ENSMUSG00000034708	Grn	14824	2203.19	0.56281	0.0701377	8.02435	1.02062e-15	2.15248e-13
ENSMUSG00000034116	Vav1	22324	174.256	0.675485	0.084671	7.97776	1.49011e-15	3.11121e-13
ENSMUSG00000040751	Lat2	56743	136.123	0.882825	0.11072	7.97352	1.54213e-15	3.18794e-13
ENSMUSG00000022912	Pros1	19128	556.625	0.638881	0.0802321	7.96291	1.68044e-15	3.4398e-13
ENSMUSG00000000628	Hk2	15277	195.106	0.615289	0.0774804	7.94122	2.00195e-15	4.05812e-13
ENSMUSG00000022488	Nckap1l	105855	597.824	0.543186	0.06879	7.8963	2.87311e-15	5.76805e-13
ENSMUSG00000023832	Acat2	110460	1398.32	0.47226	0.0598231	7.89427	2.92029e-15	5.80693e-13
ENSMUSG00000040613	Apobec1	11810	83.381	1.1998	0.152067	7.88994	3.02321e-15	5.95487e-13
ENSMUSG00000059498	Fcgr3	14131	395.527	0.999277	0.127154	7.85877	3.87909e-15	7.56929e-13
ENSMUSG00000002603	Tgfb1	21803	179.419	0.783396	0.0997562	7.8531	4.05868e-15	7.8464e-13
ENSMUSG00000042228	Lyn	17096	282.265	0.588714	0.0750985	7.83923	4.5331e-15	8.68318e-13
ENSMUSG00000021876	Rnase4	58809	500.909	0.858998	0.109634	7.83517	4.6821e-15	8.88704e-13
ENSMUSG00000034041	Lyl1	17095	88.2331	0.857042	0.109698	7.81276	5.5947e-15	1.05236e-12
ENSMUSG00000015355	Cd48	12506	42.5446	1.49296	0.191746	7.78612	6.90978e-15	1.28728e-12
ENSMUSG00000031662	Snx20	71607	49.5975	0.934051	0.11998	7.78508	6.96691e-15	1.28728e-12
ENSMUSG00000015950	Ncf1	17969	261.765	0.664127	0.0856767	7.75155	9.07751e-15	1.66254e-12
ENSMUSG00000024378	Stard4	170459	1850.47	0.593487	0.076753	7.73243	1.05516e-14	1.91571e-12
ENSMUSG00000038224	Serpinf2	18816	22.7913	1.84872	0.239526	7.71827	1.17923e-14	2.1225e-12
ENSMUSG00000022901	Cd86	12524	101.047	0.916212	0.118836	7.70989	1.2593e-14	2.24726e-12
ENSMUSG00000033880	Lgals3bp	19039	656.123	0.919965	0.119677	7.68709	1.5052e-14	2.6633e-12
ENSMUSG00000036905	C1qb	12260	1636.99	1.09092	0.142725	7.64351	2.1138e-14	3.70873e-12
ENSMUSG00000044827	Tlr1	21897	25.0672	1.81006	0.237325	7.62691	2.40449e-14	4.18362e-12
ENSMUSG00000034792	Gna15	14676	76.4539	0.753925	0.0989544	7.61891	2.55821e-14	4.41428e-12
ENSMUSG00000079110	Capn3	12335	379.153	0.611711	0.0805407	7.59506	3.0766e-14	5.22247e-12
ENSMUSG00000022892	App	11820	71150.5	0.612818	0.0812118	7.54592	4.49093e-14	7.56178e-12
ENSMUSG00000071341	Egr4	13656	944.952	-1.25155	0.166498	-7.51688	5.61007e-14	9.37062e-12
ENSMUSG00000022952	Runx1	12394	67.6485	1.01299	0.134787	7.51544	5.67179e-14	9.39851e-12
ENSMUSG00000026288	Inpp5d	16331	598.1	0.477618	0.0636407	7.50491	6.14692e-14	1.01056e-11
ENSMUSG00000029771	Irf5	27056	179.213	0.638942	0.0853295	7.48794	6.99637e-14	1.14123e-11
ENSMUSG00000002699	Lcp2	16822	118.101	0.752505	0.100638	7.47732	7.58547e-14	1.22773e-11
ENSMUSG00000018819	Lsp1	16985	268.523	0.754461	0.100974	7.47183	7.9085e-14	1.27017e-11
ENSMUSG00000038811	Gngt2	14710	86.6116	1.15656	0.154964	7.46338	8.4329e-14	1.34405e-11
ENSMUSG00000048865	Arhgap30	226652	181.643	0.656221	0.0884137	7.42216	1.15226e-13	1.82258e-11
ENSMUSG00000020256	Aldh1l2	216188	417.04	0.534039	0.0720759	7.4094	1.26876e-13	1.99177e-11
ENSMUSG00000021886	Gpr65	14744	13.9227	2.14413	0.290865	7.37158	1.68617e-13	2.62727e-11
ENSMUSG00000050335	Lgals3	16854	66.7952	1.49559	0.203344	7.35495	1.91004e-13	2.95406e-11
ENSMUSG00000026126	Ptpn18	19253	35.7544	1.03215	0.140903	7.32522	2.38503e-13	3.66154e-11
ENSMUSG00000030341	Tnfrsf1a	21937	369.289	0.699855	0.095621	7.31905	2.49725e-13	3.80585e-11
ENSMUSG00000020893	Per1	18626	5484.39	-0.883048	0.120772	-7.31168	2.63826e-13	3.99161e-11
ENSMUSG00000029816	Gpnmb	93695	193.174	1.78304	0.244135	7.30353	2.80311e-13	4.21051e-11
ENSMUSG00000024042	Sik1	17691	766.035	-1.00386	0.137826	-7.28352	3.25221e-13	4.8502e-11
ENSMUSG00000008398	Elk3	13713	359.692	0.446216	0.0613016	7.27903	3.36241e-13	4.97899e-11
ENSMUSG00000033386	Frrs1	20321	36.0591	1.23201	0.16996	7.24885	4.20317e-13	6.18014e-11
ENSMUSG00000051439	Cd14	12475	110.968	1.58802	0.220498	7.20196	5.93538e-13	8.66607e-11
ENSMUSG00000031349	Nsdhl	18194	1019.34	0.497641	0.0692698	7.18409	6.76552e-13	9.80953e-11
ENSMUSG00000017760	Ctsa	19025	3408.77	0.37985	0.0529998	7.16702	7.66472e-13	1.10367e-10
ENSMUSG00000026728	Vim	22352	1687.69	1.04873	0.146742	7.14675	8.88559e-13	1.2707e-10
ENSMUSG00000022602	Arc	11838	6038.52	-1.77793	0.248819	-7.14549	8.96737e-13	1.27367e-10
ENSMUSG00000091649	Phf11b	236451	20.1231	1.56845	0.220151	7.12444	1.04507e-12	1.47432e-10
ENSMUSG00000000290	Itgb2	16414	235.015	0.943184	0.132473	7.1198	1.08083e-12	1.51454e-10
ENSMUSG00000028583	Pdpn	14726	374.915	0.563361	0.0791495	7.11768	1.09759e-12	1.52778e-10
ENSMUSG00000030560	Ctsc	13032	367.968	0.771057	0.108608	7.09943	1.25277e-12	1.73222e-10
ENSMUSG00000024210	Ip6k3	271424	65.7785	0.971342	0.137297	7.07472	1.49747e-12	2.05695e-10
ENSMUSG00000024696	Lpxn	107321	58.5586	0.856674	0.12155	7.04789	1.81652e-12	2.4789e-10
ENSMUSG00000026656	Fcgr2b	14130	262.717	0.934342	0.132751	7.03829	1.94609e-12	2.63847e-10
ENSMUSG00000074896	Ifit3	15959	520.809	0.859919	0.122503	7.01959	2.22516e-12	2.99736e-10
ENSMUSG00000051504	Siglech	233274	566.916	0.647079	0.0922568	7.01389	2.31788e-12	3.10224e-10
ENSMUSG00000024190	Dusp1	19252	1346.4	-1.23781	0.176797	-7.00129	2.53621e-12	3.37284e-10
ENSMUSG00000052160	Pld4	104759	334.867	0.72122	0.103071	6.99728	2.60974e-12	3.44866e-10
ENSMUSG00000032359	Ctsh	13036	411.019	0.752556	0.107828	6.97921	2.96846e-12	3.87365e-10
ENSMUSG00000059743	Fdps	110196	2222.96	0.516197	0.073955	6.97988	2.95435e-12	3.87365e-10
ENSMUSG00000031077	Fadd	14082	100.642	0.594715	0.0852675	6.9747	3.06531e-12	3.97519e-10
ENSMUSG00000028967	Errfi1	74155	1235.71	-0.454769	0.0653188	-6.96231	3.34744e-12	4.31427e-10
ENSMUSG00000038418	Egr1	13653	8831.15	-1.18686	0.170759	-6.95051	3.63961e-12	4.66205e-10
ENSMUSG00000024986	Hhex	15242	72.4761	0.828558	0.119844	6.91361	4.72459e-12	6.01493e-10
ENSMUSG00000001156	Mxd1	17119	1088.67	-0.347644	0.050444	-6.89167	5.51412e-12	6.97754e-10
ENSMUSG00000032501	Trib1	211770	742.782	-0.924836	0.135114	-6.84488	7.65423e-12	9.56962e-10
ENSMUSG00000024529	Lox	16948	40.1838	1.47808	0.216087	6.8402	7.90811e-12	9.82818e-10
ENSMUSG00000021250	Fos	14281	1277.89	-1.71895	0.251403	-6.83742	8.0631e-12	9.96151e-10
ENSMUSG00000030737	Slco2b1	101488	694.125	0.486871	0.0714363	6.81546	9.39619e-12	1.15402e-09
ENSMUSG00000023367	Tmem176a	66058	577.063	0.644517	0.0946089	6.81243	9.59619e-12	1.17169e-09
ENSMUSG00000027848	Olfml3	99543	573.333	1.17922	0.173489	6.79707	1.06765e-11	1.28112e-09
ENSMUSG00000033730	Egr3	13655	1347.66	-0.963466	0.141734	-6.79772	1.0629e-11	1.28112e-09
ENSMUSG00000075510	Fam187a	66784	17.8184	1.74482	0.256662	6.79812	1.05991e-11	1.28112e-09
ENSMUSG00000047407	Tgif1	21815	73.1191	0.801459	0.118098	6.78638	1.14982e-11	1.37184e-09
ENSMUSG00000099974	Bcl2a1d	12047	19.4756	2.20133	0.324918	6.77502	1.24391e-11	1.47566e-09
ENSMUSG00000028031	Dkk2	56811	35.3117	1.05474	0.155877	6.76647	1.3196e-11	1.5566e-09
ENSMUSG00000031264	Btk	12229	54.6611	0.806569	0.119221	6.7653	1.33031e-11	1.56043e-09
ENSMUSG00000027015	Cybrd1	73649	175.727	0.846285	0.125473	6.74476	1.53284e-11	1.78795e-09
ENSMUSG00000037318	Traf3ip3	215243	45.4995	0.875949	0.130097	6.73306	1.66135e-11	1.92708e-09
ENSMUSG00000031097	Tnni2	21953	12.4603	1.77026	0.26426	6.69896	2.09913e-11	2.42143e-09
ENSMUSG00000013707	Tnfaip8l2	69769	81.6195	0.867661	0.130007	6.67397	2.48967e-11	2.85615e-09
ENSMUSG00000052837	Junb	16477	1945.98	-1.1551	0.17319	-6.66954	2.56601e-11	2.92764e-09
ENSMUSG00000024663	Rab3il1	74760	412.883	0.453782	0.0682453	6.64928	2.94524e-11	3.34205e-09
ENSMUSG00000046718	Bst2	69550	135.142	0.872412	0.131234	6.64773	2.97643e-11	3.35918e-09
ENSMUSG00000033220	Rac2	19354	110.409	0.901373	0.137913	6.53583	6.32572e-11	7.10079e-09
ENSMUSG00000015312	Gadd45b	17873	388.376	-0.576478	0.088224	-6.53425	6.3928e-11	7.1055e-09
ENSMUSG00000040345	Arhgap9	216445	43.7214	0.951514	0.145622	6.53413	6.39798e-11	7.1055e-09
ENSMUSG00000026029	Casp8	12370	92.9952	0.622186	0.0952478	6.53229	6.47708e-11	7.15528e-09
ENSMUSG00000094724	Rnaset2b	68195	1110.92	0.411332	0.0629988	6.5292	6.61239e-11	7.26632e-09
ENSMUSG00000029135	Fosl2	14284	1770.76	-0.987793	0.151416	-6.52372	6.85837e-11	7.49717e-09
ENSMUSG00000015852	Fcrls	80891	590.576	1.6271	0.249632	6.51799	7.12578e-11	7.74892e-09
ENSMUSG00000031165	Was	22376	57.9155	0.695288	0.106941	6.50162	7.94613e-11	8.59623e-09
ENSMUSG00000026479	Lamc2	16782	630.019	-0.663072	0.102084	-6.49534	8.28459e-11	8.91618e-09
ENSMUSG00000030745	Il21r	60504	63.4087	0.783476	0.120693	6.49148	8.49976e-11	9.10085e-09
ENSMUSG00000032515	Csrnp1	215418	382.602	-0.726106	0.112026	-6.48156	9.07771e-11	9.67007e-09
ENSMUSG00000018381	Abi3	66610	36.8141	0.944108	0.145993	6.46681	1.00093e-10	1.06083e-08
ENSMUSG00000035828	Pim3	223775	1361.92	-0.482874	0.0749808	-6.43997	1.19496e-10	1.26008e-08
ENSMUSG00000022148	Fyb	23880	108.79	0.815438	0.126736	6.43415	1.24164e-10	1.30272e-08
ENSMUSG00000022383	Ppara	19013	107.187	-0.580942	0.090375	-6.42813	1.29185e-10	1.34863e-08
ENSMUSG00000039633	Lonrf1	244421	1284.04	-0.281591	0.0438417	-6.4229	1.33703e-10	1.38885e-08
ENSMUSG00000090894	Olfr110	258325	7.75965	2.09536	0.326386	6.41989	1.36377e-10	1.40961e-08
ENSMUSG00000004040	Stat3	20848	2342.81	0.323826	0.0505241	6.40934	1.4615e-10	1.50318e-08
ENSMUSG00000023034	Nr4a1	15370	3572.11	-1.32725	0.207516	-6.39589	1.59612e-10	1.6336e-08
ENSMUSG00000029826	Zc3hav1	78781	274.393	0.514229	0.0804977	6.38812	1.67937e-10	1.71041e-08
ENSMUSG00000070034	Sp110	109032	56.9664	0.967681	0.151582	6.38388	1.72656e-10	1.74995e-08
ENSMUSG00000024965	Fermt3	108101	191.251	0.539391	0.0845555	6.37914	1.78087e-10	1.79627e-08
ENSMUSG00000052760	A630001G21Rik	319997	45.945	0.892956	0.140024	6.37714	1.80425e-10	1.8111e-08
ENSMUSG00000054626	Xlr	22441	50.6838	0.835291	0.13146	6.35395	2.09859e-10	2.09649e-08
ENSMUSG00000030577	Cd22	12483	20.9225	1.54512	0.243801	6.33762	2.33344e-10	2.32e-08
ENSMUSG00000020573	Pik3cg	30955	151.745	0.60765	0.0961512	6.31973	2.62017e-10	2.59273e-08
ENSMUSG00000047777	Phf13	230936	728.568	-0.401954	0.0637346	-6.30668	2.85087e-10	2.8077e-08
ENSMUSG00000003812	Dnase2a	13423	285.743	0.475657	0.0754583	6.30357	2.90861e-10	2.85112e-08
ENSMUSG00000037868	Egr2	13654	349.087	-1.92633	0.306358	-6.28785	3.2189e-10	3.14053e-08
ENSMUSG00000032691	Nlrp3	216799	61.9618	1.14128	0.182193	6.26412	3.74936e-10	3.64106e-08
ENSMUSG00000036995	Asap3	230837	319.965	0.581464	0.0929588	6.25507	3.97333e-10	3.8407e-08
ENSMUSG00000040495	Chrm4	12672	812.176	-0.472769	0.0756738	-6.24746	4.17176e-10	4.01393e-08
ENSMUSG00000048546	Tob2	57259	1075.22	-0.510256	0.0816852	-6.24661	4.19464e-10	4.01742e-08
ENSMUSG00000060671	Atp8b2	54667	5188.66	-0.266257	0.0426787	-6.23862	4.41442e-10	4.20861e-08
ENSMUSG00000037921	Ddx60	234311	68.7106	1.08575	0.174158	6.23429	4.53821e-10	4.30697e-08
ENSMUSG00000062488	Ifit3b	667370	154.131	0.761193	0.12295	6.19107	5.97583e-10	5.64567e-08
ENSMUSG00000029371	Cxcl5	20311	50.0074	1.5509	0.251155	6.17506	6.61367e-10	6.22013e-08
ENSMUSG00000025981	Coq10b	67876	921.235	-0.45275	0.073364	-6.17128	6.77391e-10	6.34227e-08
ENSMUSG00000050423	Ppp1r3g	76487	294.15	-0.709644	0.115045	-6.16842	6.89744e-10	6.42909e-08
ENSMUSG00000000275	Trim25	217069	329.183	0.503893	0.0817433	6.16433	7.07811e-10	6.56484e-08
ENSMUSG00000028480	Glipr2	384009	149.144	0.665738	0.108009	6.16371	7.10597e-10	6.56484e-08
ENSMUSG00000022906	Parp9	80285	153.005	0.589571	0.0958768	6.14926	7.78457e-10	7.16009e-08
ENSMUSG00000042613	Pbxip1	229534	2583.23	0.354425	0.0576636	6.14642	7.92499e-10	7.25727e-08
ENSMUSG00000018169	Mfng	17305	126.301	0.558379	0.0910583	6.13211	8.67234e-10	7.90698e-08
ENSMUSG00000034765	Dusp5	240672	436.189	-0.785296	0.128173	-6.12685	8.96383e-10	8.13721e-08
ENSMUSG00000090207	4930524O07Rik	406209	24.1679	-1.34835	0.220338	-6.11946	9.3893e-10	8.48654e-08
ENSMUSG00000022969	Il10rb	16155	186.697	0.444563	0.07284	6.10328	1.03912e-09	9.35167e-08
ENSMUSG00000018126	Baiap2l2	207495	98.6155	0.926752	0.151903	6.10096	1.05434e-09	9.40751e-08
ENSMUSG00000056498	Tmem154	320782	31.4733	1.19762	0.196282	6.10152	1.05064e-09	9.40751e-08
ENSMUSG00000040093	Bmf	171543	151.697	0.576955	0.0946203	6.09758	1.07688e-09	9.56772e-08
ENSMUSG00000028068	Iqgap3	404710	36.641	0.870248	0.143062	6.08301	1.17948e-09	1.04349e-07
ENSMUSG00000028341	Nr4a3	18124	1588.16	-0.985059	0.162064	-6.0782	1.21536e-09	1.07069e-07
ENSMUSG00000030523	Trpm1	17364	27.4035	0.997478	0.164212	6.07432	1.24515e-09	1.09233e-07
ENSMUSG00000034595	Ppp1r18	76448	303.34	0.375863	0.06193	6.06916	1.28578e-09	1.12325e-07
ENSMUSG00000014599	Csf1	12977	1063.84	0.438916	0.0724031	6.06212	1.3434e-09	1.16385e-07
ENSMUSG00000098112	Bin2	668218	236.107	0.543245	0.0896116	6.06221	1.34263e-09	1.16385e-07
ENSMUSG00000022323	Rida	15473	1415.51	0.464091	0.0767116	6.04982	1.45006e-09	1.25106e-07
ENSMUSG00000034640	Tiparp	99929	711.529	-0.693939	0.114884	-6.04036	1.53768e-09	1.3212e-07
ENSMUSG00000029810	Tmem176b	65963	1110.9	0.493934	0.0818336	6.03583	1.58147e-09	1.34773e-07
ENSMUSG00000047250	Ptgs1	19224	702.925	0.305318	0.0505788	6.03648	1.57512e-09	1.34773e-07
ENSMUSG00000031387	Renbp	19703	178.178	0.501567	0.0833445	6.018	1.76589e-09	1.49878e-07
ENSMUSG00000007613	Tgfbr1	21812	1486.41	0.409442	0.0681327	6.00948	1.86124e-09	1.57331e-07
ENSMUSG00000036570	Fxyd1	56188	898.423	0.585378	0.097521	6.00259	1.942e-09	1.63496e-07
ENSMUSG00000026701	Prdx6	11758	7917.92	0.364165	0.0607064	5.99879	1.98797e-09	1.66694e-07
ENSMUSG00000043969	Emx2	13797	330.366	-0.381	0.0636187	-5.98881	2.11381e-09	1.76537e-07
ENSMUSG00000018654	Ikzf1	22778	183.328	0.436857	0.0729736	5.98651	2.14394e-09	1.7834e-07
ENSMUSG00000021273	Fdft1	14137	3581.47	0.411216	0.0688401	5.9735	2.32215e-09	1.91637e-07
ENSMUSG00000068335	Dok1	13448	64.3207	0.624068	0.104462	5.9741	2.31367e-09	1.91637e-07
ENSMUSG00000022218	Tgm1	21816	26.8017	1.4262	0.239102	5.96483	2.44887e-09	2.01299e-07
ENSMUSG00000063286	Gm8995	668139	108.278	1.23646	0.207489	5.95917	2.53521e-09	2.07579e-07
ENSMUSG00000052684	Jun	16476	1826.65	-0.386155	0.0648193	-5.9574	2.56279e-09	2.09018e-07
ENSMUSG00000022817	Itgb5	16419	2063.67	0.475826	0.0799362	5.95258	2.63955e-09	2.14441e-07
ENSMUSG00000001025	S100a6	20200	557.978	0.802548	0.134875	5.95029	2.67671e-09	2.16617e-07
ENSMUSG00000021665	Hexb	15212	1805.68	0.647852	0.10894	5.94686	2.7333e-09	2.20342e-07
ENSMUSG00000025950	Idh1	15926	1820.49	0.415774	0.0699664	5.94248	2.80738e-09	2.25444e-07
ENSMUSG00000090675	Olfr111	545205	8.92432	2.19544	0.370283	5.92908	3.04639e-09	2.437e-07
ENSMUSG00000036432	Siah2	20439	577.311	-0.363577	0.0615184	-5.91006	3.41992e-09	2.72537e-07
ENSMUSG00000020067	Mypn	68802	126.381	-0.540577	0.0916269	-5.89976	3.64029e-09	2.879e-07
ENSMUSG00000048285	Frmd6	319710	1463.06	-0.519471	0.0880417	-5.90029	3.62864e-09	2.879e-07
ENSMUSG00000024621	Csf1r	12978	3015.86	0.467834	0.079452	5.88826	3.90283e-09	3.07498e-07
ENSMUSG00000071713	Csf2rb	12983	85.5545	0.96126	0.163832	5.86734	4.42836e-09	3.47593e-07
ENSMUSG00000025025	Mxi1	17859	2070.29	-0.26262	0.0448619	-5.85397	4.79981e-09	3.75338e-07
ENSMUSG00000092274	Neat1	66961	6803.22	0.680787	0.116336	5.85191	4.85968e-09	3.78602e-07
ENSMUSG00000045903	Npas4	225872	1059.49	-1.36909	0.234253	-5.84448	5.08157e-09	3.94416e-07
ENSMUSG00000005413	Hmox1	15368	196.409	0.644889	0.110951	5.81237	6.15946e-09	4.76309e-07
ENSMUSG00000090698	Apold1	381823	194.028	-1.11493	0.191966	-5.80796	6.32393e-09	4.87222e-07
ENSMUSG00000048277	Syngr2	20973	276.053	0.496999	0.085618	5.80484	6.44263e-09	4.94543e-07
ENSMUSG00000022303	Dcstamp	75766	9.63746	1.81022	0.312617	5.79053	7.01659e-09	5.36628e-07
ENSMUSG00000047180	Neurl3	214854	44.6181	1.03471	0.178912	5.78334	7.32311e-09	5.58026e-07
ENSMUSG00000024176	Sox8	20681	1626.63	-0.413193	0.0716724	-5.76502	8.16481e-09	6.19902e-07
ENSMUSG00000020773	Trim47	217333	145.007	0.636229	0.110765	5.74395	9.24952e-09	6.99713e-07
ENSMUSG00000022574	Naprt	223646	271.787	0.508397	0.088795	5.72552	1.0312e-08	7.77273e-07
ENSMUSG00000027399	Il1a	16175	27.9192	1.00391	0.175409	5.72324	1.04513e-08	7.84934e-07
ENSMUSG00000033777	Tlr13	279572	121.567	0.827411	0.144622	5.7212	1.05777e-08	7.91583e-07
ENSMUSG00000029915	Clec5a	23845	82.1633	0.763076	0.133538	5.7143	1.10155e-08	8.21401e-07
ENSMUSG00000062585	Cnr2	12802	17.0815	1.13321	0.198621	5.70541	1.16062e-08	8.62371e-07
ENSMUSG00000000278	Scpep1	74617	593.6	0.26943	0.0472481	5.70245	1.18096e-08	8.74372e-07
ENSMUSG00000024338	Psmb8	16913	81.3965	0.812708	0.142745	5.69344	1.24507e-08	9.1858e-07
ENSMUSG00000005087	Cd44	12505	322.469	0.65858	0.115755	5.68943	1.27463e-08	9.37076e-07
ENSMUSG00000031431	Tsc22d3	14605	2792.25	-0.576276	0.10151	-5.67704	1.37044e-08	1.00398e-06
ENSMUSG00000005483	Dnajb1	81489	2107.38	-0.43911	0.0775773	-5.66029	1.51114e-08	1.10318e-06
ENSMUSG00000026826	Nr4a2	18227	1424.49	-0.593463	0.104873	-5.65889	1.52357e-08	1.10838e-06
ENSMUSG00000021998	Lcp1	18826	413.173	0.537094	0.0951051	5.64737	1.62917e-08	1.177e-06
ENSMUSG00000029605	Oas1b	23961	27.3228	0.944934	0.167306	5.64794	1.62385e-08	1.177e-06
ENSMUSG00000034394	Lif	16878	36.1563	0.740272	0.131169	5.64365	1.6648e-08	1.1986e-06
ENSMUSG00000030339	Ltbr	17000	280.481	0.488861	0.0866676	5.64064	1.69418e-08	1.2114e-06
ENSMUSG00000030793	Pycard	66824	80.3533	0.672007	0.119127	5.64111	1.68958e-08	1.2114e-06
ENSMUSG00000037731	Themis2	230787	50.6255	0.734409	0.130351	5.63409	1.75986e-08	1.25406e-06
ENSMUSG00000001123	Lgals9	16859	187.478	0.577379	0.102641	5.62524	1.85247e-08	1.31557e-06
ENSMUSG00000026922	Agpat2	67512	58.8602	0.581825	0.103524	5.62019	1.90746e-08	1.35003e-06
ENSMUSG00000032578	Cish	12700	135.933	-0.448169	0.0800166	-5.60095	2.13185e-08	1.50375e-06
ENSMUSG00000042759	Apobr	171504	47.5947	0.714039	0.127557	5.59782	2.17065e-08	1.52596e-06
ENSMUSG00000019970	Sgk1	20393	2970.46	-1.06357	0.190218	-5.59136	2.25301e-08	1.57854e-06
ENSMUSG00000064267	Hvcn1	74096	456.647	0.38537	0.0689977	5.58525	2.33363e-08	1.62956e-06
ENSMUSG00000020805	Slc13a5	237831	418.153	-0.374306	0.0670348	-5.58376	2.35375e-08	1.63813e-06
ENSMUSG00000046768	Rhoj	80837	140.986	0.704665	0.126323	5.57829	2.42899e-08	1.68488e-06
ENSMUSG00000052310	Slc39a1	30791	1293.61	0.20879	0.0375124	5.56589	2.60817e-08	1.80318e-06
ENSMUSG00000010358	Ifi35	70110	81.0473	0.558131	0.10051	5.55301	2.80789e-08	1.93485e-06
ENSMUSG00000043953	Ccrl2	54199	24.5764	1.08002	0.194532	5.55186	2.82653e-08	1.94128e-06
ENSMUSG00000002257	Def6	23853	77.2576	0.560023	0.100938	5.5482	2.88619e-08	1.97576e-06
ENSMUSG00000036362	P2ry13	74191	429.08	0.618404	0.111675	5.53754	3.06758e-08	2.09307e-06
ENSMUSG00000019960	Dusp6	67603	2082.91	-0.633521	0.114443	-5.53571	3.09979e-08	2.10816e-06
ENSMUSG00000025351	Cd63	12512	2390.34	0.495602	0.0898831	5.51385	3.51075e-08	2.3799e-06
ENSMUSG00000004609	Cd33	12489	206.43	0.559533	0.101718	5.50084	3.77989e-08	2.55405e-06
ENSMUSG00000047109	Cldn14	56173	14.7312	1.41818	0.257873	5.49954	3.80791e-08	2.56469e-06
ENSMUSG00000040229	Gpr34	23890	559.314	0.745012	0.135804	5.48596	4.11237e-08	2.76084e-06
ENSMUSG00000007379	Dennd2c	329727	36.9579	0.882173	0.16107	5.47697	4.32677e-08	2.89547e-06
ENSMUSG00000015947	Fcgr1	14129	147.376	0.49496	0.0904326	5.47325	4.4186e-08	2.94747e-06
ENSMUSG00000078942	Naip6	17952	42.1283	1.0161	0.185688	5.47207	4.44806e-08	2.95768e-06
ENSMUSG00000034786	Gpsm3	106512	71.8457	0.564464	0.103597	5.44866	5.07503e-08	3.36386e-06
ENSMUSG00000030921	Trim30a	20128	133.949	0.805419	0.147914	5.44518	5.17524e-08	3.41943e-06
ENSMUSG00000028629	Exo5	73172	315.628	0.281988	0.0518384	5.43975	5.33548e-08	3.51418e-06
ENSMUSG00000029561	Oasl2	23962	161.523	0.933331	0.171616	5.43849	5.37348e-08	3.52808e-06
ENSMUSG00000056529	Ptafr	19204	88.3163	0.669596	0.123179	5.43595	5.45038e-08	3.56735e-06
ENSMUSG00000016496	Cd274	60533	131.243	0.620111	0.114254	5.42749	5.71515e-08	3.72896e-06
ENSMUSG00000015568	Lpl	16956	1453.92	0.659339	0.12157	5.42354	5.84303e-08	3.80052e-06
ENSMUSG00000044583	Tlr7	170743	136.954	0.744467	0.137734	5.40509	6.4775e-08	4.20012e-06
ENSMUSG00000032492	Pth1r	19228	279.305	0.455394	0.0843355	5.39979	6.67203e-08	4.31286e-06
ENSMUSG00000053931	Cnn3	71994	2572.42	0.371125	0.0689114	5.38555	7.22244e-08	4.63956e-06
ENSMUSG00000066861	Oas1g	23960	17.7359	1.32968	0.246922	5.38501	7.2441e-08	4.63956e-06
ENSMUSG00000030107	Usp18	24110	54.4217	0.970422	0.180371	5.38014	7.44295e-08	4.75234e-06
ENSMUSG00000021136	Smoc1	64075	781.51	0.432349	0.0803701	5.37947	7.47047e-08	4.75536e-06
ENSMUSG00000008090	Fgfrl1	116701	616.092	0.465751	0.0866301	5.37632	7.60216e-08	4.82448e-06
ENSMUSG00000039168	Dap	223453	228.716	0.336953	0.0627475	5.36998	7.87472e-08	4.98231e-06
ENSMUSG00000034459	Ifit1	15957	142.505	0.807293	0.150519	5.36339	8.16724e-08	5.15178e-06
ENSMUSG00000009585	Apobec3	80287	149.178	0.604528	0.112899	5.35458	8.57537e-08	5.37673e-06
ENSMUSG00000033488	Cryzl2	226527	382.288	0.472145	0.0881702	5.35493	8.55918e-08	5.37673e-06
ENSMUSG00000028970	Abcb1b	18669	162.554	0.423507	0.0794194	5.33254	9.68487e-08	6.0542e-06
ENSMUSG00000062382	Ftl1-ps1	634386	4013.52	0.409133	0.0767661	5.32961	9.84257e-08	6.13442e-06
ENSMUSG00000039990	Edrf1	214764	1277.28	-0.221183	0.0415052	-5.32904	9.87306e-08	6.13511e-06
ENSMUSG00000001750	Tcirg1	27060	873.961	0.472024	0.0886171	5.32655	1.00094e-07	6.20135e-06
ENSMUSG00000026104	Stat1	20846	477.406	0.320662	0.0602302	5.32393	1.01548e-07	6.27283e-06
ENSMUSG00000024691	Fam111a	107373	100.726	0.584933	0.109995	5.31781	1.05026e-07	6.46854e-06
ENSMUSG00000097194	9330175E14Rik	320377	7.75067	1.93757	0.364572	5.31465	1.06864e-07	6.5624e-06
ENSMUSG00000022491	Glycam1	14663	7.39599	1.92867	0.363228	5.3098	1.09745e-07	6.68039e-06
ENSMUSG00000035273	Hpse	15442	70.5662	0.859196	0.161803	5.31012	1.09551e-07	6.68039e-06
ENSMUSG00000035372	1810055G02Rik	72056	600.786	-0.287505	0.0541446	-5.30994	1.09661e-07	6.68039e-06
ENSMUSG00000071715	Ncf4	17972	48.0904	0.975932	0.183853	5.3082	1.10712e-07	6.71961e-06
ENSMUSG00000036526	Card11	108723	15.8501	1.22364	0.230563	5.30716	1.11345e-07	6.73848e-06
ENSMUSG00000072618	Gm10384	100038735	13.4843	1.03568	0.195441	5.29919	1.16315e-07	7.01892e-06
ENSMUSG00000090877	Hspa1b	15511	641.918	-0.907893	0.171365	-5.29801	1.17073e-07	7.04427e-06
ENSMUSG00000065590	Mir212	387208	41.7854	-1.29773	0.245029	-5.29623	1.1822e-07	7.09286e-06
ENSMUSG00000054520	Sh3bp2	24055	190.036	0.497795	0.0940636	5.29211	1.20911e-07	7.23351e-06
ENSMUSG00000029204	Rhoh	74734	34.8749	0.685761	0.12977	5.28444	1.26091e-07	7.52188e-06
ENSMUSG00000005142	Man2b1	17159	1923.81	0.468982	0.0889728	5.27107	1.35629e-07	8.06779e-06
ENSMUSG00000002233	Rhoc	11853	391.791	0.438442	0.0831927	5.27019	1.36281e-07	8.08353e-06
ENSMUSG00000021986	Amer2	72125	865.523	-0.376458	0.071538	-5.26235	1.42223e-07	8.4121e-06
ENSMUSG00000068699	Flnc	68794	220.424	0.81018	0.154338	5.2494	1.52595e-07	9.00011e-06
ENSMUSG00000060802	B2m	12010	2806.6	0.640689	0.122608	5.22553	1.73661e-07	1.02137e-05
ENSMUSG00000084381	AA413626	100359413	23.5723	0.981988	0.188105	5.22043	1.78507e-07	1.04692e-05
ENSMUSG00000017418	Arl5b	75869	1212.42	-0.410933	0.0787627	-5.21735	1.81498e-07	1.06148e-05
ENSMUSG00000029177	Cenpa	12615	74.1401	-0.491834	0.0943454	-5.21312	1.85686e-07	1.08294e-05
ENSMUSG00000037235	Mxd4	17122	3536.52	-0.285219	0.0547421	-5.21024	1.88601e-07	1.09688e-05
ENSMUSG00000045515	Pou3f3	18993	4087.07	-0.221417	0.0425039	-5.20934	1.8951e-07	1.0991e-05
ENSMUSG00000022351	Sqle	20775	2842.86	0.385264	0.073965	5.20874	1.9013e-07	1.09964e-05
ENSMUSG00000042579	4632404H12Rik	74034	471.293	0.269701	0.0518255	5.20402	1.95026e-07	1.12485e-05
ENSMUSG00000079017	Ifi27l2a	76933	48.2821	1.21437	0.233579	5.19897	2.00391e-07	1.15261e-05
ENSMUSG00000023249	Parp3	235587	212.156	0.511507	0.0984833	5.19385	2.05992e-07	1.18157e-05
ENSMUSG00000054723	Vmac	106639	473.788	0.347594	0.0669445	5.19227	2.07742e-07	1.18834e-05
ENSMUSG00000037447	Arid5a	214855	476.895	-0.455807	0.0878984	-5.18562	2.15301e-07	1.22822e-05
ENSMUSG00000021384	Susd3	66329	48.152	0.788749	0.152257	5.18038	2.21438e-07	1.25853e-05
ENSMUSG00000025161	Slc16a3	80879	189.823	0.452407	0.0873363	5.18006	2.2182e-07	1.25853e-05
ENSMUSG00000085609	1700016P03Rik	668604	245.102	-1.29336	0.251092	-5.15094	2.5919e-07	1.46657e-05
ENSMUSG00000036492	Rnf39	386454	173.847	-0.569117	0.110892	-5.13216	2.86429e-07	1.61631e-05
ENSMUSG00000025877	Hk3	212032	77.2204	0.616562	0.120226	5.12836	2.92271e-07	1.64483e-05
ENSMUSG00000032596	Uba7	74153	172.348	0.566974	0.110649	5.1241	2.98969e-07	1.678e-05
ENSMUSG00000047810	Ccdc88b	78317	294.457	0.442391	0.0863935	5.12066	3.04476e-07	1.70433e-05
ENSMUSG00000026385	Dbi	13167	3423.98	0.479429	0.0937421	5.11434	3.14835e-07	1.75256e-05
ENSMUSG00000036915	Kirrel2	243911	220.064	-0.788621	0.154212	-5.11388	3.1561e-07	1.75256e-05
ENSMUSG00000065954	Tacc1	320165	8453.39	-0.281327	0.0550035	-5.11471	3.14218e-07	1.75256e-05
ENSMUSG00000030880	Polr3e	26939	1700.72	-0.25096	0.0491664	-5.10429	3.32038e-07	1.83889e-05
ENSMUSG00000064215	Ifi27	52668	1119.35	0.388854	0.0762005	5.10304	3.34241e-07	1.84619e-05
ENSMUSG00000026547	Tagln2	21346	357.516	0.539673	0.105775	5.10211	3.35889e-07	1.8504e-05
ENSMUSG00000002204	Napsa	16541	59.4277	-1.13962	0.223646	-5.09562	3.47594e-07	1.90985e-05
ENSMUSG00000079037	Prnp	19122	31421.9	0.592689	0.116473	5.08865	3.6062e-07	1.97622e-05
ENSMUSG00000020108	Ddit4	74747	1542.58	-0.576746	0.113358	-5.08784	3.62158e-07	1.97945e-05
ENSMUSG00000022309	Angpt1	11600	329.429	0.467359	0.0919741	5.08142	3.74632e-07	2.04228e-05
ENSMUSG00000026958	Dpp7	83768	1076.15	0.260351	0.0512476	5.08026	3.7691e-07	2.04935e-05
ENSMUSG00000016526	Dyrk3	226419	358.893	-0.444601	0.0875959	-5.07559	3.86303e-07	2.09497e-05
ENSMUSG00000033114	Slc35d2	70484	24.6601	0.813128	0.160339	5.0713	3.95116e-07	2.13721e-05
ENSMUSG00000019577	Pdk4	27273	480.51	-0.651281	0.128446	-5.07046	3.96854e-07	2.14106e-05
ENSMUSG00000021025	Nfkbia	18035	563.977	-0.640548	0.126409	-5.06727	4.03552e-07	2.17159e-05
ENSMUSG00000053897	Slc39a8	67547	160.973	0.451097	0.0891237	5.06148	4.16016e-07	2.23291e-05
ENSMUSG00000031485	Plpbp	114863	2261.23	-0.250966	0.0496806	-5.05159	4.38154e-07	2.34569e-05
ENSMUSG00000052085	Dock8	76088	224.833	0.425568	0.0842782	5.04956	4.42836e-07	2.3647e-05
ENSMUSG00000046546	Fam43a	224093	589.802	-0.348493	0.069022	-5.04902	4.44088e-07	2.36534e-05
ENSMUSG00000000594	Gm2a	14667	2223.82	0.23513	0.0465745	5.04847	4.45365e-07	2.3661e-05
ENSMUSG00000024998	Plce1	74055	721.017	0.493674	0.097831	5.04619	4.50713e-07	2.38843e-05
ENSMUSG00000024079	Eif2ak2	19106	303.736	0.479784	0.0951855	5.04052	4.64272e-07	2.45406e-05
ENSMUSG00000074802	Gas2l3	237436	190.453	0.408238	0.0810607	5.0362	4.74876e-07	2.50377e-05
ENSMUSG00000031610	Scrg1	20284	746.549	0.506428	0.100574	5.03537	4.76922e-07	2.50823e-05
ENSMUSG00000041707	Tmem273	69069	31.3912	0.804584	0.159909	5.03151	4.86622e-07	2.55281e-05
ENSMUSG00000023031	Cela1	109901	107.762	0.612618	0.121916	5.02493	5.03612e-07	2.63532e-05
ENSMUSG00000062082	Cd200r4	239849	17.1941	1.14813	0.229037	5.01285	5.36304e-07	2.79937e-05
ENSMUSG00000090610	Gm3571	100041907	189.609	0.509999	0.101775	5.01102	5.41422e-07	2.81904e-05
ENSMUSG00000000031	H19	14955	10.7626	1.7595	0.351678	5.00316	5.63994e-07	2.92926e-05
ENSMUSG00000026979	Psd4	215632	66.6766	0.553027	0.110625	4.99912	5.75935e-07	2.98386e-05
ENSMUSG00000026748	Plxdc2	67448	1765.53	0.328298	0.0656873	4.99789	5.79621e-07	2.99552e-05
ENSMUSG00000030087	Klf15	66277	844.914	-0.463893	0.0929585	-4.99032	6.02803e-07	3.10763e-05
ENSMUSG00000036854	Hspb6	243912	220.605	0.403459	0.0808596	4.98963	6.04958e-07	3.11106e-05
ENSMUSG00000032265	Tent5a	212943	318.919	-0.48954	0.0982986	-4.98013	6.35411e-07	3.25964e-05
ENSMUSG00000031770	Herpud1	64209	1856.29	-0.328216	0.0659882	-4.97385	6.56357e-07	3.35884e-05
ENSMUSG00000048756	Foxo3	56484	3632.53	-0.286806	0.0577018	-4.97048	6.67865e-07	3.40938e-05
ENSMUSG00000064109	Hcst	23900	11.5661	1.17107	0.235742	4.96757	6.77979e-07	3.45257e-05
ENSMUSG00000003382	Etv3	27049	1539.86	-0.227479	0.0458136	-4.96532	6.85872e-07	3.48426e-05
ENSMUSG00000091971	Hspa1a	193740	98.8261	-0.773634	0.155831	-4.96457	6.8853e-07	3.48928e-05
ENSMUSG00000073155	1810058I24Rik	67705	669.065	0.31793	0.0640569	4.96325	6.93235e-07	3.50461e-05
ENSMUSG00000058881	Zfp516	329003	750.6	-0.308128	0.0620917	-4.96246	6.96065e-07	3.51042e-05
ENSMUSG00000041378	Cldn5	12741	790.47	0.750517	0.151294	4.96067	7.02521e-07	3.53444e-05
ENSMUSG00000046879	Irgm1	15944	331.576	0.462872	0.0933517	4.95837	7.10862e-07	3.56781e-05
ENSMUSG00000037860	Aim2	383619	96.292	0.616026	0.124254	4.95779	7.13014e-07	3.57003e-05
ENSMUSG00000053907	Mat2a	232087	7530.72	-0.209528	0.0422954	-4.95392	7.27335e-07	3.63302e-05
ENSMUSG00000020432	Tcn2	21452	663.63	0.452636	0.0914215	4.95109	7.37981e-07	3.6774e-05
ENSMUSG00000047798	Cd300lf	246746	127.073	1.60057	0.323319	4.95042	7.40529e-07	3.68131e-05
ENSMUSG00000040061	Plcb2	18796	197.403	0.442097	0.0893582	4.94747	7.51838e-07	3.72865e-05
ENSMUSG00000031647	Mfap3l	71306	2831.75	0.326866	0.0661212	4.94344	7.67554e-07	3.79757e-05
ENSMUSG00000049516	Spty2d1	101685	982.74	-0.289625	0.0586472	-4.93843	7.87526e-07	3.88718e-05
ENSMUSG00000034947	Tmem106a	217203	68.9084	0.618357	0.125315	4.93442	8.03892e-07	3.9586e-05
ENSMUSG00000020190	Mknk2	17347	1658.87	-0.319237	0.0647058	-4.93367	8.06986e-07	3.96448e-05
ENSMUSG00000025492	Ifitm3	66141	290.573	0.770409	0.156223	4.93146	8.16176e-07	4.00022e-05
ENSMUSG00000102037	Bcl2a1a	12044	7.63565	1.85804	0.377601	4.92063	8.62669e-07	4.21819e-05
ENSMUSG00000034957	Cebpa	12606	413.079	0.42472	0.0863574	4.91816	8.73595e-07	4.26163e-05
ENSMUSG00000020482	Ccdc117	104479	849.191	-0.334112	0.0680323	-4.91109	9.05723e-07	4.40806e-05
ENSMUSG00000050708	Ftl1	14325	2725.29	0.312651	0.0637814	4.90192	9.49069e-07	4.60828e-05
ENSMUSG00000024854	Pold4	69745	346.043	0.367313	0.0751189	4.88975	1.00962e-06	4.89093e-05
ENSMUSG00000024793	Tnfrsf25	85030	446.915	-0.934632	0.191234	-4.88736	1.02197e-06	4.93262e-05
ENSMUSG00000027188	Pamr1	210622	1250.61	-0.4113	0.0841591	-4.88717	1.02295e-06	4.93262e-05
ENSMUSG00000028599	Tnfrsf1b	21938	155.324	0.51115	0.104759	4.87928	1.06476e-06	5.1224e-05
ENSMUSG00000031207	Msn	17698	1133.08	0.486202	0.099672	4.87802	1.07156e-06	5.14327e-05
ENSMUSG00000027832	Ptx3	19288	17.3294	1.2585	0.258036	4.87724	1.07579e-06	5.1517e-05
ENSMUSG00000035673	Sbno2	216161	946.73	0.364132	0.0746971	4.87478	1.08931e-06	5.20452e-05
ENSMUSG00000027447	Cst3	13010	35730.3	0.416	0.085674	4.85562	1.20011e-06	5.7208e-05
ENSMUSG00000055148	Klf2	16598	202.266	-0.768291	0.158365	-4.85139	1.22598e-06	5.83078e-05
ENSMUSG00000020092	Pald1	27355	590.036	0.275697	0.0568437	4.85008	1.23409e-06	5.85605e-05
ENSMUSG00000025764	Jade1	269424	2384.41	-0.15985	0.0329717	-4.8481	1.24647e-06	5.90135e-05
ENSMUSG00000000056	Narf	67608	2160.2	-0.223644	0.0461773	-4.84317	1.27782e-06	6.02496e-05
ENSMUSG00000022114	Spry2	24064	1526.91	-0.287635	0.0593908	-4.84309	1.27835e-06	6.02496e-05
ENSMUSG00000098702	1500015A07Rik	68982	175.322	0.337611	0.0697306	4.84165	1.28766e-06	6.0552e-05
ENSMUSG00000029217	Tec	21682	90.8914	0.49734	0.102846	4.83579	1.32616e-06	6.22222e-05
ENSMUSG00000059555	Tor4a	227612	112.105	0.560264	0.115887	4.83456	1.3344e-06	6.24684e-05
ENSMUSG00000050592	Fam78a	241303	305.227	-0.422511	0.0874493	-4.83149	1.35513e-06	6.32969e-05
ENSMUSG00000048779	P2ry6	233571	112.025	0.564813	0.116946	4.82969	1.36746e-06	6.3689e-05
ENSMUSG00000049999	Ppp1r3d	228966	305.735	-0.251028	0.0519793	-4.82937	1.36962e-06	6.3689e-05
ENSMUSG00000031698	Mylk3	213435	116.534	-0.687869	0.142914	-4.81317	1.48554e-06	6.89257e-05
ENSMUSG00000037321	Tap1	21354	161.904	0.590578	0.122786	4.80981	1.51071e-06	6.9938e-05
ENSMUSG00000031490	Eif4ebp1	13685	95.0802	0.607281	0.126271	4.80933	1.51435e-06	6.99517e-05
ENSMUSG00000043993	2900052L18Rik	102640779	180.576	0.418499	0.0870758	4.80615	1.53865e-06	7.06055e-05
ENSMUSG00000073700	Klhl21	242785	836.235	-0.249581	0.051925	-4.80658	1.53534e-06	7.06055e-05
ENSMUSG00000008384	Sertad1	55942	327.482	-0.474829	0.0988077	-4.80558	1.54303e-06	7.0651e-05
ENSMUSG00000028874	Fgr	14191	20.7452	1.38876	0.289077	4.80412	1.55432e-06	7.10123e-05
ENSMUSG00000033355	Rtp4	67775	78.9611	0.639062	0.133153	4.79945	1.59103e-06	7.25307e-05
ENSMUSG00000063268	Parp10	671535	160.098	0.415326	0.0866434	4.79351	1.63891e-06	7.45506e-05
ENSMUSG00000000673	Haao	107766	13.012	1.23897	0.258516	4.79264	1.646e-06	7.47104e-05
ENSMUSG00000035901	Dennd5a	19347	12435.4	-0.140275	0.0292774	-4.79123	1.65759e-06	7.50732e-05
ENSMUSG00000030844	Rgs10	67865	1056.85	0.339778	0.0710182	4.78437	1.71523e-06	7.75157e-05
ENSMUSG00000030220	Arhgdib	11857	272.59	0.500392	0.104661	4.7811	1.74342e-06	7.86197e-05
ENSMUSG00000042190	Cmklr1	14747	133.644	0.600837	0.12581	4.77575	1.79037e-06	8.05627e-05
ENSMUSG00000030403	Vasp	22323	460.082	0.257065	0.05384	4.77461	1.80059e-06	8.08484e-05
ENSMUSG00000020077	Srgn	19073	218.054	0.57552	0.120692	4.76851	1.85594e-06	8.27997e-05
ENSMUSG00000024799	Tm7sf2	73166	794.243	0.247995	0.0520061	4.76857	1.85542e-06	8.27997e-05
ENSMUSG00000080885	Rpl10-ps6	100043010	2498.25	0.324013	0.067947	4.76862	1.85496e-06	8.27997e-05
ENSMUSG00000047875	Gpr157	269604	193.265	0.382152	0.0802388	4.76269	1.91031e-06	8.50433e-05
ENSMUSG00000022014	Epsti1	108670	37.2796	0.691283	0.145284	4.75817	1.9536e-06	8.67856e-05
ENSMUSG00000052776	Oas1a	246730	19.9021	1.04238	0.219111	4.75733	1.96175e-06	8.69626e-05
ENSMUSG00000041538	H2-Ob	15002	48.2839	0.966241	0.203287	4.7531	2.00321e-06	8.86121e-05
ENSMUSG00000046223	Plaur	18793	36.4857	0.932487	0.196634	4.74224	2.11367e-06	9.33009e-05
ENSMUSG00000020423	Btg2	12227	815.047	-0.997031	0.210306	-4.74086	2.12813e-06	9.35435e-05
ENSMUSG00000021939	Ctsb	13030	23017.9	0.259176	0.0546662	4.74106	2.12599e-06	9.35435e-05
ENSMUSG00000034959	Rubcnl	271221	66.0188	0.469211	0.0990393	4.73762	2.16243e-06	9.48516e-05
ENSMUSG00000000184	Ccnd2	12444	2350.78	-0.388094	0.0821405	-4.72476	2.30388e-06	0.000100844
ENSMUSG00000046167	Gldn	235379	117.313	0.558197	0.118384	4.71514	2.41548e-06	0.000105508
ENSMUSG00000000386	Mx1	17857	24.3114	1.05576	0.224014	4.71293	2.44177e-06	0.000105902
ENSMUSG00000022971	Ifnar2	15976	374.816	0.248464	0.0527187	4.71302	2.44074e-06	0.000105902
ENSMUSG00000046186	Cd109	235505	110.049	0.879845	0.186697	4.71268	2.44479e-06	0.000105902
ENSMUSG00000071042	Rasgrp3	240168	618.357	0.425685	0.0903655	4.7107	2.46867e-06	0.000106715
ENSMUSG00000004730	Adgre1	13733	255.278	0.623158	0.132674	4.69691	2.64132e-06	0.000113561
ENSMUSG00000020823	Sec14l1	74136	9319.3	-0.267219	0.0568897	-4.69714	2.63829e-06	0.000113561
ENSMUSG00000041859	Mcm3	17215	101.276	0.420864	0.0896075	4.69675	2.64335e-06	0.000113561
ENSMUSG00000046794	Ppp1r3b	244416	79.6548	0.649253	0.138247	4.69633	2.64883e-06	0.000113562
ENSMUSG00000007682	Dio2	13371	2154.02	-0.426919	0.0909227	-4.69541	2.66074e-06	0.000113743
ENSMUSG00000074170	Plekhf1	72287	118.556	-0.859059	0.182967	-4.69516	2.66394e-06	0.000113743
ENSMUSG00000053560	Ier2	15936	293.763	-0.761823	0.162337	-4.69284	2.69439e-06	0.000114809
ENSMUSG00000024411	Aqp4	11829	6214.98	0.521202	0.111137	4.68973	2.73568e-06	0.00011633
ENSMUSG00000024308	Tapbp	21356	1097.72	0.261499	0.0557807	4.68798	2.75914e-06	0.000117089
ENSMUSG00000030786	Itgam	16409	888.898	0.462401	0.0986674	4.68646	2.77964e-06	0.00011772
ENSMUSG00000038235	F11r	16456	260.261	0.452034	0.0964713	4.68568	2.79031e-06	0.000117933
ENSMUSG00000031938	4931406C07Rik	70984	1036.06	0.200913	0.0428884	4.68456	2.8056e-06	0.00011834
ENSMUSG00000037754	Ppp1r16b	228852	6104.78	-0.233369	0.0498647	-4.68004	2.86816e-06	0.000120734
ENSMUSG00000044626	Liph	239759	35.8046	0.652514	0.139569	4.67521	2.93658e-06	0.000123366
ENSMUSG00000021477	Ctsl	13039	3255.4	0.306158	0.0656698	4.66208	3.1303e-06	0.00013124
ENSMUSG00000101122	Gm17971	100416214	34.8879	-0.758856	0.162818	-4.66076	3.15042e-06	0.000131819
ENSMUSG00000024725	Ostf1	20409	458.676	0.268604	0.0576482	4.65936	3.17201e-06	0.000132457
ENSMUSG00000037172	E330009J07Rik	243780	4219.09	-0.222121	0.0477504	-4.65171	3.29195e-06	0.000136917
ENSMUSG00000029759	Pon3	269823	86.9398	0.59761	0.128557	4.64861	3.34177e-06	0.000138713
ENSMUSG00000025058	5430427O19Rik	71398	17.1018	0.870924	0.18749	4.64518	3.39773e-06	0.000140757
ENSMUSG00000030111	A2m	232345	314.708	1.02941	0.221672	4.64384	3.41986e-06	0.000141393
ENSMUSG00000020388	Pdlim4	30794	308.292	0.416059	0.0896405	4.64142	3.46018e-06	0.000142777
ENSMUSG00000045312	Lhfpl2	218454	856.079	0.280442	0.0604391	4.64007	3.48293e-06	0.000143432
ENSMUSG00000028268	Gbp3	55932	199.58	0.82563	0.177989	4.63866	3.50669e-06	0.000144126
ENSMUSG00000062310	Glrp1	14659	8.15193	1.13081	0.243808	4.63809	3.51637e-06	0.00014424
ENSMUSG00000046062	Ppp1r15b	108954	2648.64	-0.175878	0.0379429	-4.63534	3.56353e-06	0.000145888
ENSMUSG00000028673	Fuca1	71665	1197.58	0.228919	0.0495861	4.61659	3.90089e-06	0.000159387
ENSMUSG00000038866	Zcchc2	227449	1260.9	-0.236986	0.0513731	-4.61304	3.96827e-06	0.000161823
ENSMUSG00000050732	Vamp8	22320	284.4	0.452596	0.0981222	4.61257	3.97715e-06	0.000161869
ENSMUSG00000040543	Pitpnm3	327958	5108.42	-0.301875	0.0655033	-4.60855	4.05487e-06	0.000164711
ENSMUSG00000045036	Tmem232	381107	70.7882	-0.46901	0.101872	-4.60391	4.14626e-06	0.000168097
ENSMUSG00000042312	S100a13	20196	528.842	0.462802	0.100539	4.60319	4.16064e-06	0.000168353
ENSMUSG00000015340	Cybb	13058	72.7967	1.23436	0.26829	4.60086	4.20753e-06	0.000169921
ENSMUSG00000042106	Inka1	68176	57.4606	0.509506	0.110943	4.59248	4.38013e-06	0.00017655
ENSMUSG00000015314	Slamf6	30925	13.2294	0.963873	0.210336	4.58254	4.59358e-06	0.000184797
ENSMUSG00000035283	Adrb1	11554	841.478	-0.398348	0.0869364	-4.58206	4.60422e-06	0.000184868
ENSMUSG00000090035	Galnt4	14426	178.478	0.361773	0.0789811	4.5805	4.63866e-06	0.000185894
ENSMUSG00000070532	Ccdc190	78465	189.939	0.413768	0.0903846	4.57786	4.69768e-06	0.000187898
ENSMUSG00000079057	Cyp4v3	102294	340.279	0.32327	0.0706887	4.57315	4.80438e-06	0.000191799
ENSMUSG00000061232	H2-K1	14972	991.261	0.713533	0.15621	4.56779	4.92899e-06	0.000196398
ENSMUSG00000026433	Rab29	226422	137.55	0.431219	0.0944841	4.56393	5.02039e-06	0.000199658
ENSMUSG00000052105	Mtcl1	68617	4115.51	-0.26858	0.0588951	-4.56031	5.10783e-06	0.000202365
ENSMUSG00000024610	Cd74	16149	348.676	1.22825	0.269384	4.55948	5.12814e-06	0.000202402
ENSMUSG00000041939	Mvk	17855	794.857	0.357155	0.078332	4.5595	5.12754e-06	0.000202402
ENSMUSG00000000567	Sox9	20682	1342.08	0.347999	0.0763576	4.55749	5.17691e-06	0.000203843
ENSMUSG00000039304	Tnfsf10	22035	126.841	0.885387	0.194283	4.55719	5.18419e-06	0.000203843
ENSMUSG00000010142	Tnfrsf13b	57916	53.2777	0.620114	0.136121	4.55561	5.2234e-06	0.000204953
ENSMUSG00000016624	Phf21b	271305	485.533	-0.391463	0.0859438	-4.55487	5.24186e-06	0.000204953
ENSMUSG00000022797	Tfrc	22042	4944.29	0.341952	0.0750702	4.55509	5.2363e-06	0.000204953
ENSMUSG00000052302	Tbc1d30	74694	5029.84	-0.301886	0.0664214	-4.54501	5.49333e-06	0.000213984
ENSMUSG00000099966	2810402E24Rik	100504278	121.807	0.386752	0.0851303	4.54306	5.54429e-06	0.000215566
ENSMUSG00000040690	Col16a1	107581	1684.37	0.506126	0.111477	4.5402	5.62008e-06	0.000218107
ENSMUSG00000031827	Cotl1	72042	2383.55	0.359092	0.0791358	4.53767	5.68786e-06	0.000220328
ENSMUSG00000027907	S100a11	20195	101.625	0.722356	0.159591	4.52629	6.00292e-06	0.000232102
ENSMUSG00000000562	Adora3	11542	38.0425	0.600996	0.133094	4.51556	6.31494e-06	0.000243715
ENSMUSG00000050288	Fzd2	57265	444.184	-0.417822	0.0925591	-4.51411	6.35827e-06	0.000244934
ENSMUSG00000044080	S100a1	20193	1675.42	0.372058	0.082455	4.51226	6.41417e-06	0.000246633
ENSMUSG00000003949	Hlf	217082	8067.31	-0.288357	0.0639177	-4.51138	6.44078e-06	0.0002472
ENSMUSG00000090122	Kcne1l	66240	195.914	0.549669	0.122215	4.49755	6.87399e-06	0.000263343
ENSMUSG00000040511	Pvr	52118	407.928	-0.315341	0.0702174	-4.49092	7.0915e-06	0.000271179
ENSMUSG00000102205	9430092D12Rik	77427	64.0446	0.522305	0.116359	4.48874	7.1645e-06	0.000273469
ENSMUSG00000039476	Prrx2	20204	33.2339	0.798107	0.177819	4.48831	7.17914e-06	0.000273528
ENSMUSG00000006649	Nphs1	54631	58.1004	-0.597649	0.133213	-4.48643	7.24278e-06	0.00027545
ENSMUSG00000041482	Piezo2	667742	84.0279	0.671577	0.149737	4.48505	7.28981e-06	0.000276734
ENSMUSG00000000416	Cttnbp2	30785	5384.4	-0.239781	0.0534687	-4.48451	7.30834e-06	0.000276934
ENSMUSG00000017057	Il13ra1	16164	358.206	0.384949	0.0858671	4.48307	7.35754e-06	0.000277818
ENSMUSG00000085030	2810455O05Rik	72822	623.208	-0.339537	0.075738	-4.48305	7.35828e-06	0.000277818
ENSMUSG00000025498	Irf7	54123	89.2593	0.739105	0.164881	4.48265	7.37221e-06	0.000277842
ENSMUSG00000028701	Lurap1	68075	1078.49	-0.236459	0.0527707	-4.48088	7.43365e-06	0.000279653
ENSMUSG00000042207	Kdm5b	75605	3358.43	-0.186617	0.0416742	-4.478	7.53456e-06	0.000282939
ENSMUSG00000026227	2810459M11Rik	72792	551.616	0.37346	0.0834338	4.47613	7.60084e-06	0.000284916
ENSMUSG00000063611	Gm10134	100038637	16.3638	0.804541	0.179808	4.47444	7.66135e-06	0.000286669
ENSMUSG00000040663	Clcf1	56708	74.1144	0.597037	0.133461	4.47349	7.69514e-06	0.000287418
ENSMUSG00000037855	Zfp365	216049	16614.1	-0.26159	0.0584836	-4.47288	7.71723e-06	0.000287729
ENSMUSG00000016087	Fli1	14247	140.651	0.451601	0.101059	4.46868	7.87054e-06	0.000291881
ENSMUSG00000028037	Ifi44	99899	42.8869	1.37005	0.306578	4.46884	7.86439e-06	0.000291881
ENSMUSG00000043015	Nemp2	227094	396.854	0.343226	0.0768038	4.46886	7.86365e-06	0.000291881
ENSMUSG00000033157	Abhd10	213012	813.408	0.181492	0.0406328	4.46663	7.94595e-06	0.000294155
ENSMUSG00000024008	Cpne5	240058	3850.5	-0.296776	0.0664743	-4.46452	8.02475e-06	0.000296546
ENSMUSG00000075389	2810410L24Rik	100042332	215.249	0.36491	0.0818984	4.45564	8.36418e-06	0.000307999
ENSMUSG00000028270	Gbp2	14469	143.764	0.914778	0.20537	4.4543	8.41674e-06	0.000309389
ENSMUSG00000037185	Krt80	74127	92.8791	-0.774706	0.173986	-4.45269	8.48005e-06	0.000310037
ENSMUSG00000038550	Ciart	229599	692.255	-0.558218	0.125355	-4.45309	8.46422e-06	0.000310037
ENSMUSG00000047604	Frat2	212398	212.96	-0.284687	0.0639409	-4.45234	8.49376e-06	0.000310037
ENSMUSG00000056917	Sipa1	20469	575.927	0.343815	0.0772131	4.4528	8.47559e-06	0.000310037
ENSMUSG00000024818	Slc25a45	107375	169.041	0.426908	0.0959533	4.44912	8.62216e-06	0.000314175
ENSMUSG00000006333	Rps9	76846	5923.22	0.360418	0.0810304	4.44794	8.66996e-06	0.000315366
ENSMUSG00000021895	Arhgef3	71704	2929.35	-0.288558	0.064897	-4.4464	8.73193e-06	0.000316733
ENSMUSG00000096003	Gm3500	100041678	23.8473	0.71208	0.160153	4.44626	8.73789e-06	0.000316733
ENSMUSG00000026749	Nek6	59126	1065.59	0.254173	0.057191	4.44428	8.81863e-06	0.000319106
ENSMUSG00000058290	Espl1	105988	62.651	0.43573	0.098133	4.4402	8.98764e-06	0.000324659
ENSMUSG00000026819	Slc25a25	227731	2745.77	-0.218013	0.0491225	-4.43814	9.07382e-06	0.000327206
ENSMUSG00000032377	Plscr4	235527	186.052	0.391457	0.0882426	4.43615	9.15817e-06	0.000329277
ENSMUSG00000097750	Gm4673	100043823	127.689	0.372119	0.0838853	4.43604	9.16279e-06	0.000329277
ENSMUSG00000036158	Prickle1	106042	3069.24	-0.253993	0.0572791	-4.43431	9.23685e-06	0.000331368
ENSMUSG00000034652	Cd300a	217303	113.139	0.422908	0.0957447	4.41704	1.0006e-05	0.000357733
ENSMUSG00000024885	Aldh3b1	67689	216.188	0.378387	0.0857134	4.41456	1.01214e-05	0.000361239
ENSMUSG00000039013	Siglecf	233186	31.9048	0.974252	0.22095	4.40939	1.03664e-05	0.000368722
ENSMUSG00000042507	Elmsan1	238317	1287.35	-0.245602	0.0557832	-4.40279	1.0687e-05	0.000379478
ENSMUSG00000040842	Szrd1	213491	1360.82	0.215295	0.0489389	4.39927	1.08616e-05	0.000385024
ENSMUSG00000018648	Dusp14	56405	1444.88	-0.36746	0.0836615	-4.39222	1.12201e-05	0.000396735
ENSMUSG00000057143	Trim12c	319236	126.807	0.601843	0.137031	4.39203	1.123e-05	0.000396735
ENSMUSG00000040272	Accs	329470	263.876	0.333238	0.0759162	4.38954	1.1359e-05	0.000400614
ENSMUSG00000068742	Cry2	12953	5804.73	-0.270431	0.0616739	-4.38486	1.16063e-05	0.000408647
ENSMUSG00000037408	Cnnm4	94220	616.476	-0.231322	0.0527702	-4.38357	1.1675e-05	0.000410376
ENSMUSG00000070942	Il1rl2	107527	52.2254	0.525327	0.119856	4.38299	1.17061e-05	0.000410776
ENSMUSG00000091754	Gm3636	100041151	106.857	0.366	0.0836817	4.37371	1.22151e-05	0.000427918
ENSMUSG00000025404	R3hdm2	71750	9268.12	-0.271794	0.0621657	-4.37209	1.23066e-05	0.0004304
ENSMUSG00000071847	Apcdd1	494504	629.65	0.396906	0.0908269	4.36991	1.24296e-05	0.000433975
ENSMUSG00000046962	Zbtb21	114565	948.359	-0.182138	0.0417051	-4.36729	1.25798e-05	0.000438489
ENSMUSG00000056880	Gadl1	73748	37.2983	0.870092	0.199258	4.36667	1.26156e-05	0.000439
ENSMUSG00000068220	Lgals1	16852	438.011	0.547889	0.125635	4.36095	1.29497e-05	0.000449877
ENSMUSG00000061983	Rps12	20042	5385.02	0.392905	0.0902278	4.35459	1.33314e-05	0.000462369
ENSMUSG00000040363	Bcor	71458	1118.94	-0.334415	0.0768718	-4.3503	1.35953e-05	0.000470741
ENSMUSG00000027514	Zbp1	58203	16.2567	1.24532	0.286355	4.34886	1.3685e-05	0.00047306
ENSMUSG00000026456	Cyb5r1	72017	868.914	0.305734	0.0703298	4.34714	1.37921e-05	0.000475976
ENSMUSG00000067586	S1pr3	13610	364.007	0.387019	0.0891024	4.34353	1.4021e-05	0.000483078
ENSMUSG00000040136	Abcc8	20927	1579.08	-0.314649	0.0725532	-4.33681	1.44566e-05	0.000497265
ENSMUSG00000074457	S100a16	67860	1989.77	0.438167	0.101053	4.336	1.45098e-05	0.000498274
ENSMUSG00000025402	Nab2	17937	842.156	-0.396749	0.091706	-4.32631	1.51627e-05	0.000519838
ENSMUSG00000041736	Tspo	12257	129.196	0.597934	0.138254	4.3249	1.52598e-05	0.00052231
ENSMUSG00000078202	Nrarp	67122	95.7165	-0.487444	0.112731	-4.32395	1.53263e-05	0.000523727
ENSMUSG00000006517	Mvd	192156	777.155	0.407401	0.0942582	4.32218	1.54497e-05	0.000527081
ENSMUSG00000091549	Gm6548	625054	177.254	0.289002	0.0668966	4.32013	1.55939e-05	0.000531134
ENSMUSG00000103520	1110025M09Rik	68635	36.8098	0.538294	0.124819	4.3126	1.61347e-05	0.000548657
ENSMUSG00000019897	Ccdc59	52713	1007.23	0.186357	0.0432619	4.30765	1.64999e-05	0.000560164
ENSMUSG00000037887	Dusp8	18218	6038.8	-0.197679	0.0458958	-4.30712	1.65394e-05	0.000560594
ENSMUSG00000029641	Rasl11a	68895	110.121	-0.467213	0.108711	-4.29774	1.72545e-05	0.00058378
ENSMUSG00000038507	Parp12	243771	479.345	0.256041	0.0595802	4.29742	1.72794e-05	0.00058378
ENSMUSG00000049092	Gpr137c	70713	878.246	-0.275122	0.0640843	-4.29313	1.7617e-05	0.000594224
ENSMUSG00000030681	Mvp	78388	348.216	0.317183	0.073898	4.29217	1.76937e-05	0.00059585
ENSMUSG00000032680	6820408C15Rik	228778	127.072	0.317877	0.0740839	4.29077	1.78054e-05	0.000598647
ENSMUSG00000028636	Ppcs	106564	225.444	0.323316	0.0754394	4.28577	1.82105e-05	0.000611283
ENSMUSG00000028194	Ddah1	69219	4046.47	0.218903	0.0510926	4.28443	1.83207e-05	0.000613992
ENSMUSG00000025511	Tspan4	64540	462.399	0.314905	0.0735187	4.28333	1.8412e-05	0.000614951
ENSMUSG00000039377	Hlx	15284	23.4329	0.802581	0.187362	4.28359	1.83905e-05	0.000614951
ENSMUSG00000025602	Zfp202	80902	231.606	0.217733	0.0509012	4.27756	1.88952e-05	0.000629208
ENSMUSG00000031166	Wdr13	73447	8818.56	-0.107293	0.0250926	-4.27589	1.90378e-05	0.000632948
ENSMUSG00000021550	2210016F16Rik	70153	378.424	0.257164	0.0601829	4.27304	1.92827e-05	0.000640068
ENSMUSG00000074622	Mafb	16658	636.288	0.330832	0.0774822	4.26978	1.95666e-05	0.000648463
ENSMUSG00000044005	Gls2	216456	1129.15	-0.22422	0.0525403	-4.26759	1.97598e-05	0.000653827
ENSMUSG00000037703	Lzts3	241638	10351.9	-0.211638	0.0496035	-4.26661	1.98468e-05	0.000655667
ENSMUSG00000044350	Lacc1	210808	236.558	0.331649	0.0777888	4.26346	2.01288e-05	0.000663703
ENSMUSG00000080626	Mir1192	100316672	10.448	-1.04291	0.244632	-4.26318	2.01536e-05	0.000663703
ENSMUSG00000025738	Fbxl16	214931	26058.6	-0.238003	0.0558345	-4.26266	2.02007e-05	0.000664205
ENSMUSG00000031604	Msmo1	66234	3309.36	0.33321	0.0781768	4.26227	2.02364e-05	0.000664334
ENSMUSG00000028362	Tnfsf8	21949	17.5562	2.30124	0.540056	4.26112	2.03408e-05	0.000666713
ENSMUSG00000049649	Gpr3	14748	307.249	-0.572009	0.134267	-4.26024	2.04211e-05	0.000668293
ENSMUSG00000102059	Gm20257	100504501	38.2764	0.576797	0.135435	4.25883	2.05497e-05	0.00067145
ENSMUSG00000028680	Plk3	12795	535.132	-0.342538	0.0804495	-4.2578	2.0645e-05	0.00067351
ENSMUSG00000002985	Apoe	11816	46209	0.285278	0.0670779	4.25293	2.10992e-05	0.000687255
ENSMUSG00000001020	S100a4	20198	65.3619	0.917955	0.21591	4.25156	2.12288e-05	0.0006904
ENSMUSG00000030103	Bhlhe40	20893	4220.22	-0.422726	0.0995472	-4.24649	2.17149e-05	0.000704415
ENSMUSG00000031103	Elf4	56501	77.1527	0.495652	0.116724	4.24636	2.17272e-05	0.000704415
ENSMUSG00000097027	Gm26559	102639339	32.1362	0.660773	0.155624	4.24595	2.1767e-05	0.000704611
ENSMUSG00000029304	Spp1	20750	628.57	1.05339	0.24836	4.24139	2.22142e-05	0.000717971
ENSMUSG00000027422	Rrbp1	81910	3203.44	0.233163	0.0549779	4.24103	2.22493e-05	0.000717994
ENSMUSG00000093930	Hmgcs1	208715	11513.7	0.330898	0.0780417	4.24001	2.23508e-05	0.000720159
ENSMUSG00000050493	Fam167b	230766	24.869	0.857512	0.202273	4.23939	2.24132e-05	0.000721055
ENSMUSG00000057554	Lgals8	56048	1321.41	0.191559	0.0452082	4.23726	2.26263e-05	0.000726791
ENSMUSG00000040128	Pnrc1	108767	1340.22	-0.198607	0.0468968	-4.23498	2.28573e-05	0.000733085
ENSMUSG00000063558	Aox1	11761	398.224	0.342697	0.080933	4.23433	2.2923e-05	0.000734065
ENSMUSG00000069893	9930111J21Rik1	667214	66.0686	0.717038	0.1696	4.22782	2.3597e-05	0.000754491
ENSMUSG00000096753	Fam181a	100504156	83.5626	0.552257	0.130719	4.22477	2.39182e-05	0.000763589
ENSMUSG00000018217	Pmp22	18858	999.484	0.344648	0.081612	4.223	2.41067e-05	0.000768435
ENSMUSG00000026380	Tfcp2l1	81879	397.433	0.437489	0.103694	4.21903	2.45356e-05	0.000780914
ENSMUSG00000031320	Rps4x	20102	8072.53	0.273357	0.0648059	4.21809	2.46382e-05	0.000782985
ENSMUSG00000052748	Swt1	66875	552.018	-0.333302	0.0790439	-4.21666	2.47944e-05	0.000786751
ENSMUSG00000038894	Irs2	384783	1324.49	-0.533186	0.126577	-4.21233	2.52749e-05	0.00080078
ENSMUSG00000046721	Rpl14-ps1	100040970	4574.56	0.294172	0.0698457	4.21175	2.534e-05	0.000801628
ENSMUSG00000045055	Rpsa-ps2	622655	1376.99	0.392293	0.0931726	4.21039	2.54925e-05	0.00080523
ENSMUSG00000063849	Ppcdc	66812	542.197	0.187837	0.0446489	4.20699	2.5879e-05	0.000816206
ENSMUSG00000019122	Ccl9	20308	35.7918	1.06221	0.253342	4.19279	2.75548e-05	0.000867746
ENSMUSG00000014791	Elmo3	234683	281.723	0.349471	0.0835112	4.18472	2.85513e-05	0.000897774
ENSMUSG00000026879	Gsn	227753	2304.22	0.323717	0.0773814	4.18339	2.87193e-05	0.000901698
ENSMUSG00000066407	Gm10263	100042864	1195.06	0.363803	0.0869895	4.18215	2.88767e-05	0.000905282
ENSMUSG00000026387	Sctr	319229	25.2117	0.867655	0.207594	4.17958	2.92048e-05	0.000914194
ENSMUSG00000035367	Rmi1	74386	722.215	0.148226	0.0355224	4.17274	3.0096e-05	0.000939275
ENSMUSG00000007872	Id3	15903	882.896	0.375419	0.0900596	4.16856	3.06528e-05	0.000952644
ENSMUSG00000028443	Nudt2	66401	537.095	0.281038	0.0674249	4.16816	3.07069e-05	0.000952644
ENSMUSG00000044367	Slc16a13	69309	274.384	0.269562	0.064667	4.16846	3.06667e-05	0.000952644
ENSMUSG00000075327	Zbtb2	381990	451.763	-0.248365	0.0595753	-4.16892	3.06045e-05	0.000952644
ENSMUSG00000033526	Ppip5k1	327655	6601.88	-0.165294	0.0396804	-4.16564	3.10477e-05	0.000960364
ENSMUSG00000048163	Selplg	20345	839.912	0.373182	0.0896406	4.16309	3.13971e-05	0.000969732
ENSMUSG00000040997	Abhd4	105501	2327.94	0.238992	0.0574599	4.15929	3.19245e-05	0.000984565
ENSMUSG00000005225	Plekha8	231999	751.737	-0.189893	0.045675	-4.15748	3.21775e-05	0.000990907
ENSMUSG00000024246	Thumpd2	72167	187.629	0.242246	0.0582749	4.15694	3.22533e-05	0.000991776
ENSMUSG00000004018	Fancl	67030	207.061	0.29015	0.0698394	4.15453	3.2596e-05	0.000999394
ENSMUSG00000018541	Cwc25	67480	737.615	-0.186601	0.0449187	-4.15419	3.26446e-05	0.000999394
ENSMUSG00000084796	Mir142hg	78591	10.5484	1.08924	0.262201	4.15424	3.26373e-05	0.000999394
ENSMUSG00000032353	Tmed3	66111	946.696	0.285756	0.0689139	4.14656	3.37503e-05	0.00103173
ENSMUSG00000068245	Phf11d	219132	25.9242	0.755201	0.182162	4.14578	3.38662e-05	0.00103376
ENSMUSG00000051985	Igfn1	226438	1888.96	-0.469064	0.113165	-4.14494	3.39907e-05	0.00103605
ENSMUSG00000096054	Syne1	64009	16456.1	-0.156011	0.0376914	-4.13916	3.48573e-05	0.00106091
ENSMUSG00000032554	Trf	22041	300.537	0.671303	0.162241	4.13769	3.50822e-05	0.00106465
ENSMUSG00000065537	Mir132	387150	67.5466	-1.14376	0.276405	-4.13799	3.50358e-05	0.00106465
ENSMUSG00000032193	Ldlr	16835	1252.99	0.363154	0.0878862	4.13209	3.59479e-05	0.00108776
ENSMUSG00000051506	Wdfy4	545030	176.246	0.33495	0.0810556	4.13235	3.59067e-05	0.00108776
ENSMUSG00000074151	Nlrc5	434341	78.1001	0.82259	0.199101	4.13152	3.60373e-05	0.00108889
ENSMUSG00000037465	Klf10	21847	1084.09	-0.565528	0.136972	-4.12877	3.64705e-05	0.00110039
ENSMUSG00000050212	Eva1b	230752	54.7233	0.538905	0.130546	4.12808	3.65803e-05	0.00110211
ENSMUSG00000040713	Creg1	433375	1155.91	0.204152	0.0495063	4.12376	3.72742e-05	0.0011214
ENSMUSG00000026222	Sp100	20684	136.355	0.60677	0.147253	4.12059	3.77898e-05	0.00113527
ENSMUSG00000027775	Mfsd1	66868	1144.17	0.173622	0.0421579	4.11838	3.81548e-05	0.00114459
ENSMUSG00000040296	Ddx58	230073	225.227	0.34984	0.0849873	4.11638	3.84876e-05	0.00115292
ENSMUSG00000022037	Clu	12759	24016.3	0.247429	0.0601324	4.11474	3.87612e-05	0.00115945
ENSMUSG00000056708	Ier5	15939	2562.81	-0.387373	0.0941781	-4.1132	3.90213e-05	0.00116556
ENSMUSG00000039480	Nt5dc1	319638	124.839	0.37962	0.0923145	4.11224	3.91832e-05	0.00116872
ENSMUSG00000022575	Gsdmd	69146	119.508	0.431298	0.104917	4.11086	3.9418e-05	0.00117405
ENSMUSG00000034379	Wdr5b	69544	168.058	0.290385	0.0706594	4.10965	3.9626e-05	0.00117856
ENSMUSG00000070576	Mn1	433938	1795.15	-0.324794	0.0791099	-4.1056	4.03269e-05	0.001196
ENSMUSG00000042997	Nhlrc3	212114	606.533	0.218047	0.0531226	4.1046	4.05015e-05	0.00119947
ENSMUSG00000049502	Dtx3l	209200	237.269	0.302241	0.0736564	4.10339	4.07145e-05	0.00120408
ENSMUSG00000028494	Plin2	11520	235.83	0.411869	0.100525	4.09719	4.18204e-05	0.00123503
ENSMUSG00000024349	Tmem173	72512	123.22	0.416189	0.101588	4.09684	4.1882e-05	0.00123511
ENSMUSG00000028890	Mtf1	17764	1383.7	-0.220354	0.0537953	-4.09616	4.20059e-05	0.00123701
ENSMUSG00000001052	Sec24b	99683	2844.12	-0.122974	0.030036	-4.09421	4.23619e-05	0.00124224
ENSMUSG00000002668	Dennd1c	70785	84.6111	0.530261	0.129498	4.09473	4.22665e-05	0.00124224
ENSMUSG00000064246	Chil1	12654	384.706	0.439357	0.107309	4.09432	4.23405e-05	0.00124224
ENSMUSG00000021327	Zkscan3	72739	2256.11	-0.233801	0.0572009	-4.08737	4.36286e-05	0.00127759
ENSMUSG00000001065	Zfp276	57247	674.914	-0.263637	0.0645277	-4.08563	4.39568e-05	0.0012854
ENSMUSG00000034035	Ccdc17	622665	110.38	0.389106	0.0953196	4.08212	4.46261e-05	0.00130314
ENSMUSG00000039158	Akna	100182	219.525	0.336524	0.0824568	4.08122	4.47992e-05	0.00130637
ENSMUSG00000038205	Prkab2	108097	2305.77	-0.180253	0.04418	-4.07996	4.50425e-05	0.00131163
ENSMUSG00000007039	Ddah2	51793	361.972	0.326579	0.0800786	4.07823	4.53801e-05	0.00131962
ENSMUSG00000041438	Utp4	21771	1033.93	-0.171785	0.0421914	-4.07156	4.67003e-05	0.00135424
ENSMUSG00000063856	Gpx1	14775	1931.43	0.331462	0.0814028	4.07187	4.66374e-05	0.00135424
ENSMUSG00000032643	Fhl3	14201	36.0198	0.548077	0.134705	4.06873	4.72692e-05	0.00136884
ENSMUSG00000026829	Gbgt1	227671	43.3054	0.52233	0.12839	4.0683	4.7357e-05	0.00136948
ENSMUSG00000035356	Nfkbiz	80859	278.169	-0.301809	0.0741967	-4.06769	4.74818e-05	0.00137119
ENSMUSG00000037805	Rpl10a	19896	5072.24	0.302966	0.0744909	4.06715	4.75907e-05	0.00137244
ENSMUSG00000010307	Tmem86a	67893	603.668	0.293232	0.0721945	4.0617	4.87175e-05	0.001403
ENSMUSG00000089671	Gm16537	102638434	14.9724	-0.938736	0.231179	-4.06064	4.89391e-05	0.00140744
ENSMUSG00000025508	Rplp2	67186	3401.33	0.333449	0.0821875	4.05718	4.96688e-05	0.00142646
ENSMUSG00000027935	Rab13	68328	221.772	0.325119	0.0802763	4.05001	5.12165e-05	0.00146889
ENSMUSG00000004791	Pgf	18654	110.416	0.412177	0.101844	4.04713	5.18486e-05	0.00148101
ENSMUSG00000016559	H3f3b	15081	6322.26	0.20084	0.0496216	4.04743	5.17825e-05	0.00148101
ENSMUSG00000042857	Gm9776	328309	157.804	0.33535	0.0828614	4.04712	5.18521e-05	0.00148101
ENSMUSG00000098609	Anxa11os	105245705	31.5686	-0.940427	0.232599	-4.04313	5.27429e-05	0.0015044
ENSMUSG00000018476	Kdm6b	216850	1685.6	-0.379718	0.0939439	-4.04197	5.30034e-05	0.00150771
ENSMUSG00000071068	Treml2	328833	30.6346	1.06708	0.263985	4.04218	5.29565e-05	0.00150771
ENSMUSG00000032698	Lmo2	16909	695.479	0.262681	0.0650349	4.03908	5.36611e-05	0.00152083
ENSMUSG00000038065	Mturn	68235	6255.4	-0.127489	0.0315631	-4.03919	5.36369e-05	0.00152083
ENSMUSG00000039714	Cplx3	235415	623.548	0.400219	0.099089	4.03898	5.36832e-05	0.00152083
ENSMUSG00000004661	Arid3b	56380	345.414	-0.378163	0.0937096	-4.03548	5.44902e-05	0.0015416
ENSMUSG00000095115	Itpripl2	319622	270.984	0.441667	0.10951	4.03314	5.50364e-05	0.00155495
ENSMUSG00000020707	Rnf135	71956	155.281	0.286282	0.0710203	4.03098	5.55438e-05	0.00156516
ENSMUSG00000031283	Chrdl1	83453	616.804	-0.422091	0.104712	-4.03097	5.55477e-05	0.00156516
ENSMUSG00000022372	Sla	20491	351.863	0.259784	0.0645579	4.02405	5.72049e-05	0.0016084
ENSMUSG00000034422	Parp14	547253	169.432	0.513313	0.127565	4.02392	5.72364e-05	0.0016084
ENSMUSG00000078580	E430018J23Rik	101604	255.979	0.220773	0.0549271	4.01938	5.83509e-05	0.00163751
ENSMUSG00000049686	Orai1	109305	199.435	0.279857	0.0696377	4.01875	5.85075e-05	0.0016397
ENSMUSG00000032202	Rab27a	11891	392.169	0.225858	0.0562966	4.01193	6.02249e-05	0.00168331
ENSMUSG00000032231	Anxa2	12306	442.542	0.543815	0.135659	4.0087	6.10548e-05	0.00170195
ENSMUSG00000098475	Mir6982	102465593	30.7326	-0.780331	0.194864	-4.00449	6.21506e-05	0.00173019
ENSMUSG00000031504	Rab20	19332	17.5461	0.745757	0.186369	4.00152	6.29375e-05	0.00174976
ENSMUSG00000026921	Egfl7	353156	676.384	0.311356	0.0778225	4.00085	6.31146e-05	0.00175235
ENSMUSG00000040557	Mettl27	79565	342.805	0.31319	0.0783131	3.9992	6.35568e-05	0.00176229
ENSMUSG00000020262	Adarb1	110532	11484.3	-0.192302	0.0481088	-3.99724	6.40861e-05	0.00177461
ENSMUSG00000020053	Igf1	16000	524.678	0.275035	0.0688473	3.99485	6.47351e-05	0.0017902
ENSMUSG00000033016	Nfatc1	18018	216.093	0.289523	0.0725769	3.98919	6.63002e-05	0.00183106
ENSMUSG00000065485	Mir219a-2	723904	36.0138	0.805744	0.202081	3.98723	6.68488e-05	0.00184271
ENSMUSG00000093979	Gm2237	100039441	63.9248	0.415581	0.104233	3.98706	6.68985e-05	0.00184271
ENSMUSG00000042349	Ikbke	56489	106.077	0.445828	0.111844	3.98615	6.71533e-05	0.00184729
ENSMUSG00000067786	Nnat	18111	6852.96	0.387705	0.0972809	3.98542	6.73609e-05	0.00185056
ENSMUSG00000024352	Spata24	71242	183.791	0.304515	0.0764738	3.98195	6.83528e-05	0.00187535
ENSMUSG00000041959	S100a10	20194	647.513	0.465653	0.116989	3.9803	6.8827e-05	0.00188588
ENSMUSG00000032518	Rpsa	16785	8239.83	0.352172	0.0886702	3.9717	7.13618e-05	0.00195277
ENSMUSG00000036644	Tbc1d9b	76795	9358.3	-0.189279	0.0478336	-3.95702	7.5889e-05	0.00207394
ENSMUSG00000016619	Nup50	18141	1904.43	-0.146564	0.0370683	-3.95388	7.68932e-05	0.00209863
ENSMUSG00000038342	Mlxip	208104	1896.2	-0.222102	0.0562251	-3.95023	7.80766e-05	0.00212815
ENSMUSG00000063919	Srrm4	68955	2388.9	-0.262321	0.0664461	-3.94787	7.88495e-05	0.00214641
ENSMUSG00000066000	Zfp979	112422	66.0331	0.748801	0.189983	3.94141	8.10051e-05	0.00219936
ENSMUSG00000022718	Dgcr8	94223	1433.56	-0.150724	0.0383068	-3.93466	8.33155e-05	0.00225915
ENSMUSG00000030671	Pde3b	18576	622.749	0.210712	0.0535665	3.93365	8.36657e-05	0.0022657
ENSMUSG00000046562	Unc119b	106840	1349.53	-0.165202	0.0420021	-3.93319	8.38258e-05	0.0022671
ENSMUSG00000035621	Midn	59090	2530.92	-0.404332	0.102886	-3.92992	8.49757e-05	0.00229522
ENSMUSG00000045268	Zfp691	195522	198.558	0.292714	0.0745859	3.92452	8.69011e-05	0.0023442
ENSMUSG00000035692	Isg15	100038882	79.6906	0.583929	0.148936	3.92066	8.83067e-05	0.00237904
ENSMUSG00000021556	Golm1	105348	1149.68	0.276669	0.0706194	3.91774	8.93829e-05	0.00240184
ENSMUSG00000036820	Amdhd2	245847	655.192	0.297659	0.0759746	3.91788	8.93317e-05	0.00240184
ENSMUSG00000073489	Ifi204	15951	23.6553	1.16337	0.297416	3.91158	9.16951e-05	0.00245764
ENSMUSG00000058558	Rpl5	100503670	6258.55	0.315762	0.0807886	3.9085	9.28724e-05	0.002486
ENSMUSG00000085260	Med9os	100504121	23.714	0.606587	0.155366	3.90424	9.45203e-05	0.00252687
ENSMUSG00000010067	Rassf1	56289	224.734	-0.236466	0.0606051	-3.90174	9.55019e-05	0.00254985
ENSMUSG00000020887	A230052G05Rik	442796	29.8149	-0.536666	0.137579	-3.90079	9.58804e-05	0.00255669
ENSMUSG00000030101	Sumf1	58911	1004.94	0.16167	0.0415365	3.89225	9.93181e-05	0.00264498
ENSMUSG00000005621	Zfp592	233410	1537.04	-0.191112	0.0491219	-3.89057	0.000100008	0.00265997
ENSMUSG00000019823	Mical1	171580	371.426	0.21416	0.055115	3.88569	0.000102038	0.0027105
ENSMUSG00000042063	Zfp386	56220	944.208	0.303335	0.0780979	3.88404	0.000102736	0.00272557
ENSMUSG00000027961	Lrrc39	109245	68.0511	0.432178	0.111291	3.88332	0.000103042	0.00273021
ENSMUSG00000070469	Adamtsl3	269959	181.024	0.849825	0.218884	3.88254	0.000103373	0.00273551
ENSMUSG00000020785	Camkk1	55984	5560.99	-0.231499	0.0596405	-3.88157	0.000103782	0.00274234
ENSMUSG00000027699	Ect2	13605	25.5188	0.801417	0.206481	3.88131	0.000103893	0.00274234
ENSMUSG00000022615	Tymp	72962	70.7985	0.345462	0.0890345	3.88009	0.000104417	0.00275269
ENSMUSG00000022440	C1qtnf6	72709	77.2284	0.38809	0.100072	3.87811	0.000105271	0.0027682
ENSMUSG00000028069	Gpatch4	66614	750.365	0.263667	0.0679857	3.87828	0.0001052	0.0027682
ENSMUSG00000043298	Smco3	654818	220.735	-0.348943	0.0900066	-3.87686	0.000105814	0.0027755
ENSMUSG00000070737	Tmem35b	100039968	169.663	0.31542	0.0813549	3.87708	0.000105717	0.0027755
ENSMUSG00000026956	Uap1l1	227620	702.73	0.24312	0.0627439	3.8748	0.000106711	0.0027955
ENSMUSG00000031101	Sash3	74131	79.6647	0.459567	0.118741	3.87034	0.000108686	0.00284367
ENSMUSG00000000531	Grasp	56149	1350.45	-0.287624	0.0743409	-3.86899	0.000109286	0.00285579
ENSMUSG00000037112	Sik2	235344	1065.49	-0.386315	0.0998592	-3.86859	0.000109464	0.00285688
ENSMUSG00000032528	Vipr1	22354	1306.28	-0.309946	0.0802032	-3.86451	0.000111313	0.00290151
ENSMUSG00000029560	Snx8	231834	714.602	0.292388	0.0756956	3.86268	0.000112148	0.00291963
ENSMUSG00000026675	Hsd17b7	15490	905.858	0.3081	0.0798105	3.86039	0.000113205	0.00294347
ENSMUSG00000031875	Cmtm3	68119	304.837	0.325225	0.0843165	3.85719	0.000114696	0.00297483
ENSMUSG00000043964	Orai3	269999	660.192	0.233803	0.0606121	3.85737	0.000114614	0.00297483
ENSMUSG00000023949	Tcte1	21645	70.5693	-0.38647	0.100307	-3.85288	0.000116739	0.00302405
ENSMUSG00000101493	2810405F17Rik	69975	60.6202	0.410762	0.106697	3.84981	0.000118211	0.00305839
ENSMUSG00000023192	Grm2	108068	1704.86	-0.423742	0.110087	-3.84917	0.00011852	0.00306259
ENSMUSG00000037727	Avp	11998	716.196	1.12276	0.291751	3.84837	0.000118906	0.00306877
ENSMUSG00000027952	Pmvk	68603	1416.21	0.222852	0.0579269	3.84713	0.000119511	0.00308058
ENSMUSG00000005947	Itgae	16407	18.7201	0.661281	0.171977	3.84518	0.000120463	0.00309911
ENSMUSG00000025372	Baiap2	108100	10408.1	-0.227039	0.0590469	-3.84505	0.000120527	0.00309911
ENSMUSG00000056749	Nfil3	18030	341.121	-0.413549	0.107566	-3.84459	0.000120753	0.00309959
ENSMUSG00000079197	Psme2	19188	635.993	0.207766	0.0540437	3.84441	0.000120842	0.00309959
ENSMUSG00000020428	Gabra6	14399	21.3832	3.52958	0.918339	3.84343	0.000121325	0.00310815
ENSMUSG00000025533	Asl	109900	685.52	0.243108	0.0632712	3.84233	0.000121874	0.00311838
ENSMUSG00000031023	Akip1	57373	91.9278	0.340532	0.0886471	3.84143	0.000122321	0.00312599
ENSMUSG00000005958	Ephb3	13845	862.011	-0.291474	0.0758986	-3.84031	0.000122881	0.00313646
ENSMUSG00000020100	Slc29a3	71279	741.382	0.238259	0.0621445	3.83394	0.000126105	0.00321145
ENSMUSG00000053559	Smagp	207818	33.6983	0.518994	0.13537	3.8339	0.000126126	0.00321145
ENSMUSG00000029213	Commd8	27784	1954.14	0.204032	0.0532863	3.82898	0.000128678	0.00327243
ENSMUSG00000034330	Plcg2	234779	202.328	0.314765	0.0822718	3.82592	0.000130286	0.00330803
ENSMUSG00000044595	Dnd1	213236	61.9492	-0.542659	0.141845	-3.82571	0.000130394	0.00330803
ENSMUSG00000003418	St8sia6	241230	213.452	0.443531	0.115984	3.82407	0.000131266	0.0033261
ENSMUSG00000040287	Stac3	237611	164.113	-0.616498	0.161348	-3.82091	0.000132957	0.00336487
ENSMUSG00000017679	Ttpal	76080	3358.82	-0.129392	0.0338738	-3.81984	0.000133541	0.00337146
ENSMUSG00000040952	Rps19	20085	3743.64	0.343645	0.0899603	3.81997	0.00013347	0.00337146
ENSMUSG00000039461	Tcta	102791	1156.35	0.20978	0.0549483	3.81776	0.000134668	0.00339582
ENSMUSG00000026283	Ing5	66262	703.117	-0.137913	0.0361865	-3.81118	0.000138305	0.00348331
ENSMUSG00000000555	Itga5	16402	275.504	0.414633	0.108819	3.8103	0.000138797	0.00348729
ENSMUSG00000024909	Efemp2	58859	422.265	0.269575	0.0707468	3.81042	0.000138729	0.00348729
ENSMUSG00000031681	Smad1	17125	1038.73	-0.149718	0.0392982	-3.8098	0.000139081	0.00349024
ENSMUSG00000097123	Gm6297	622208	80.4927	0.351291	0.0922383	3.80851	0.000139804	0.00350417
ENSMUSG00000050063	Klk6	19144	287.798	0.800663	0.21027	3.80779	0.000140216	0.00351028
ENSMUSG00000026355	Mcm6	17219	361.617	0.269409	0.070779	3.80634	0.000141037	0.0035266
ENSMUSG00000048965	Mrgpre	244238	645.728	0.264102	0.0694017	3.8054	0.000141573	0.00353576
ENSMUSG00000057863	Rpl36	54217	2902.63	0.356305	0.0936858	3.80319	0.000142846	0.00356329
ENSMUSG00000037885	Stk35	67333	1499.34	-0.191642	0.0504144	-3.80134	0.000143913	0.00358563
ENSMUSG00000034744	Nagk	56174	1286.47	0.220104	0.0579662	3.79711	0.000146392	0.00364304
ENSMUSG00000048895	Cdk5r1	12569	11551.7	-0.220905	0.058189	-3.79633	0.000146852	0.00365015
ENSMUSG00000017167	Cntnap1	53321	11979.5	-0.232041	0.0611304	-3.79584	0.000147147	0.00365313
ENSMUSG00000015709	Arnt2	11864	12570.4	-0.22198	0.0585096	-3.79391	0.000148293	0.0036715
ENSMUSG00000022508	Bcl6	12053	1033.66	-0.247826	0.0653167	-3.79422	0.000148107	0.0036715
ENSMUSG00000025464	Paox	212503	116.208	0.263518	0.069462	3.79371	0.000148415	0.0036715
ENSMUSG00000001473	Tubb6	67951	200.281	0.657221	0.1735	3.78802	0.000151853	0.00375212
ENSMUSG00000101856	1700096K18Rik	73571	71.4137	0.358608	0.0946786	3.78763	0.000152091	0.00375355
ENSMUSG00000055866	Per2	18627	1922.6	-0.541991	0.143108	-3.78727	0.000152309	0.00375451
ENSMUSG00000018042	Cyb5r3	109754	2282.42	0.233938	0.0617764	3.78684	0.000152572	0.00375656
ENSMUSG00000040322	Slc25a24	229731	129.139	0.380035	0.100402	3.78515	0.000153616	0.00377778
ENSMUSG00000060126	Tpt1	22070	17083.9	0.255038	0.0674081	3.78349	0.000154648	0.00379423
ENSMUSG00000033618	Map3k13	71751	1134.88	-0.329613	0.0871557	-3.78188	0.000155646	0.00381425
ENSMUSG00000036560	Lgi4	243914	572.074	0.310189	0.0820271	3.78154	0.000155864	0.00381509
ENSMUSG00000028634	Hivep3	16656	3554.51	-0.373226	0.0988631	-3.77518	0.000159893	0.00390458
ENSMUSG00000100281	4930422M22Rik	73774	129.342	-0.284648	0.0753987	-3.77524	0.000159852	0.00390458
ENSMUSG00000031987	Egln1	112405	2785.54	-0.185814	0.0492633	-3.77185	0.000162044	0.00394813
ENSMUSG00000038268	Ovca2	246257	382.93	-0.468604	0.124238	-3.77183	0.000162055	0.00394813
ENSMUSG00000034161	Scx	20289	108.917	-0.344245	0.0912796	-3.77132	0.000162385	0.00395157
ENSMUSG00000045322	Tlr9	81897	73.0452	0.498621	0.13232	3.7683	0.000164364	0.00399507
ENSMUSG00000033446	Lpar6	67168	129.146	0.386631	0.10274	3.76319	0.000167763	0.00407293
ENSMUSG00000040188	Scamp2	24044	871.26	0.166744	0.0443146	3.76275	0.000168058	0.00407535
ENSMUSG00000033082	Clec1a	243653	39.6429	0.57598	0.153086	3.76245	0.000168256	0.00407543
ENSMUSG00000069835	Sat2	69215	331.096	0.233539	0.0621522	3.75754	0.000171591	0.00415139
ENSMUSG00000097347	Gm17275	100504581	175.841	-0.405329	0.107914	-3.75602	0.000172638	0.00417189
ENSMUSG00000064023	Klk8	259277	107.042	0.515783	0.137354	3.75514	0.000173244	0.00418169
ENSMUSG00000061751	Kalrn	545156	20121	-0.285157	0.0759551	-3.75428	0.000173837	0.00419116
ENSMUSG00000022419	Deptor	97998	1580.58	-0.288902	0.0769724	-3.75331	0.000174513	0.0042026
ENSMUSG00000020930	Ccdc103	73293	116.308	0.332293	0.0885439	3.75286	0.000174825	0.00420527
ENSMUSG00000039176	Polg	18975	2515.45	-0.150414	0.0401103	-3.75002	0.000176822	0.00424842
ENSMUSG00000090691	Gm3667	100042100	81.4136	0.352875	0.0941078	3.74969	0.000177056	0.00424913
ENSMUSG00000046402	Rbp1	19659	379.792	0.562293	0.15003	3.74786	0.000178347	0.00427521
ENSMUSG00000051735	Rinl	320435	91.7189	0.335698	0.0896205	3.74578	0.000179837	0.00430411
ENSMUSG00000081984	Dnajb3	15504	37.3011	0.47334	0.126372	3.7456	0.000179965	0.00430411
ENSMUSG00000044986	Tst	22117	735.489	0.371831	0.0992821	3.74519	0.000180256	0.00430613
ENSMUSG00000044636	Csrnp2	207785	1434.62	-0.157606	0.0421236	-3.74152	0.000182907	0.00436448
ENSMUSG00000027293	Ehd4	98878	726.994	0.227654	0.0608768	3.73958	0.000184326	0.00439089
ENSMUSG00000031762	Mt2	17750	2846.57	0.468627	0.12532	3.73943	0.000184435	0.00439089
ENSMUSG00000022498	Txndc11	106200	1407.58	-0.117758	0.0314954	-3.73889	0.000184832	0.00439533
ENSMUSG00000062031	Pgghg	212974	255.493	0.287697	0.0770695	3.73295	0.00018925	0.00449529
ENSMUSG00000024749	Tmc1	13409	13.1938	-0.936962	0.251316	-3.72823	0.000192832	0.00456996
ENSMUSG00000084797	Gm14321	100048985	12.2336	0.871949	0.233957	3.72696	0.000193803	0.00458777
ENSMUSG00000039728	Slc6a5	104245	183.604	1.99587	0.535815	3.72493	0.00019537	0.00461963
ENSMUSG00000097890	4930547M16Rik	75299	27.1245	0.525401	0.141118	3.72312	0.000196773	0.00464754
ENSMUSG00000024427	Spry4	24066	634.755	-0.466228	0.125263	-3.72198	0.000197666	0.00465899
ENSMUSG00000063628	Gm7665	665509	44.7165	0.615886	0.165475	3.72193	0.000197704	0.00465899
ENSMUSG00000003429	Rps11	27207	6107.2	0.270616	0.0727293	3.72086	0.000198542	0.00467345
ENSMUSG00000054836	Elp6	72341	392.976	0.224477	0.0603755	3.71801	0.000200795	0.00472118
ENSMUSG00000020614	Fam20a	208659	467.377	-0.267085	0.0718478	-3.71738	0.000201302	0.00472778
ENSMUSG00000006920	Ezh1	14055	3125.51	-0.13136	0.0353653	-3.71439	0.000203696	0.00477861
ENSMUSG00000082860	Gm13204	100043151	95.5774	-0.381974	0.102873	-3.71308	0.000204752	0.004798
ENSMUSG00000069792	Wfdc17	100034251	14.629	0.986353	0.265865	3.70998	0.000207273	0.00485163
ENSMUSG00000000958	Slc7a7	20540	81.7522	0.334034	0.0901183	3.70662	0.000210043	0.00489999
ENSMUSG00000038485	Socs7	192157	5741.53	-0.168402	0.0454305	-3.7068	0.000209891	0.00489999
ENSMUSG00000050930	Map10	74393	167.671	0.343806	0.0927432	3.70707	0.000209672	0.00489999
ENSMUSG00000034300	Fam53c	66306	3502.06	-0.157643	0.0425526	-3.70465	0.000211679	0.00493265
ENSMUSG00000029120	Ppp2r2c	269643	22651	-0.156977	0.0423796	-3.70406	0.000212176	0.00493322
ENSMUSG00000079547	H2-DMb1	14999	45.7456	0.893929	0.241325	3.70425	0.000212016	0.00493322
ENSMUSG00000020435	Osbp2	74309	3354.69	-0.189065	0.0510533	-3.70329	0.000212821	0.00494269
ENSMUSG00000031523	Dlc1	50768	2486.8	-0.255041	0.0688822	-3.70257	0.00021343	0.00495134
ENSMUSG00000018401	Mtmr4	170749	4810.34	-0.171913	0.0464375	-3.70204	0.000213875	0.00495614
ENSMUSG00000003559	As3mt	57344	507.934	0.266377	0.0719963	3.69987	0.000215709	0.00499312
ENSMUSG00000026883	Dab2ip	69601	5026.68	-0.233293	0.0630752	-3.69864	0.000216755	0.00501177
ENSMUSG00000043644	0610009L18Rik	66838	117.541	0.386406	0.104504	3.69751	0.000217723	0.00502859
ENSMUSG00000028378	Ptgr1	67103	49.28	0.498235	0.134806	3.69593	0.000219085	0.00505445
ENSMUSG00000024622	Hmgxb3	106894	1703.92	-0.192356	0.0520862	-3.69303	0.000221601	0.00509767
ENSMUSG00000033124	Atg9a	245860	2509.97	-0.290934	0.0787725	-3.69334	0.000221326	0.00509767
ENSMUSG00000035681	Kcnc2	268345	4781.35	-0.227108	0.0614981	-3.69292	0.000221691	0.00509767
ENSMUSG00000057036	Gm7536	665189	5280.93	0.292662	0.0793044	3.69037	0.000223932	0.00513788
ENSMUSG00000057895	Zfp105	22646	186.501	0.240959	0.0652897	3.6906	0.000223722	0.00513788
ENSMUSG00000037938	Chchd5	66170	265.504	0.277534	0.0752184	3.68971	0.000224508	0.00514544
ENSMUSG00000020522	Mfap3	216760	1059.43	-0.230245	0.0624357	-3.68772	0.000226275	0.00518025
ENSMUSG00000028551	Cdkn2c	12580	79.3949	0.347375	0.0942498	3.68569	0.000228085	0.00521091
ENSMUSG00000056211	R3hdm1	226412	14686.3	-0.221227	0.0600237	-3.68566	0.000228113	0.00521091
ENSMUSG00000058099	Nfam1	74039	146.677	0.364954	0.0990385	3.68497	0.00022873	0.0052193
ENSMUSG00000066278	Vps37b	330192	508.086	-0.235779	0.0640599	-3.68061	0.000232679	0.00530361
ENSMUSG00000024687	Osbp	76303	3096.2	-0.130953	0.035588	-3.6797	0.000233506	0.00531121
ENSMUSG00000033998	Kcnk1	16525	2639.88	-0.281101	0.0763926	-3.67969	0.000233521	0.00531121
ENSMUSG00000071415	Rpl23	65019	5846.24	0.275122	0.0748261	3.67681	0.000236168	0.00536556
ENSMUSG00000098557	Kctd12	239217	1751.83	0.217642	0.059217	3.67534	0.000237537	0.00539079
ENSMUSG00000053470	Kdm3a	104263	1904.33	-0.184543	0.0502297	-3.67399	0.000238792	0.00541339
ENSMUSG00000021943	Gdf10	14560	215.941	-0.283621	0.0772074	-3.67349	0.000239255	0.00541802
ENSMUSG00000020695	Mrc2	17534	475.639	0.604741	0.164694	3.6719	0.000240751	0.00544076
ENSMUSG00000029723	Tsc22d4	78829	2657.9	0.250251	0.0681536	3.67187	0.000240781	0.00544076
ENSMUSG00000042197	Zfp451	98403	5047.28	-0.582706	0.15873	-3.67105	0.000241559	0.00545245
ENSMUSG00000004043	Stat5a	20850	108.959	0.324086	0.0883021	3.6702	0.00024236	0.00545872
ENSMUSG00000032178	Ilf3	16201	3574.85	-0.113719	0.0309884	-3.66974	0.000242801	0.00546277
ENSMUSG00000024451	Arap3	106952	374.333	0.337527	0.0919889	3.66922	0.000243292	0.00546408
ENSMUSG00000032807	Alox12b	11686	180.241	-0.477538	0.13015	-3.66912	0.000243383	0.00546408
ENSMUSG00000054204	Alkal2	100294583	28.9965	-0.592535	0.161512	-3.66868	0.000243805	0.00546767
ENSMUSG00000007216	Zfp775	243372	331.977	0.262674	0.0716104	3.66809	0.000244366	0.00547438
ENSMUSG00000013419	Zfp651	270210	3829.26	-0.202901	0.0553608	-3.66506	0.000247279	0.00553369
ENSMUSG00000043290	Zfp784	654801	192.999	0.241618	0.0659535	3.66346	0.000248831	0.00555768
ENSMUSG00000067597	Dgat2l6	668257	52.4018	-0.530054	0.144689	-3.66341	0.000248883	0.00555768
ENSMUSG00000006313	Upk1a	109637	29.0102	-0.587557	0.160397	-3.66313	0.000249151	0.00555771
ENSMUSG00000030898	Cckbr	12426	1735.17	-0.313813	0.0856922	-3.6621	0.000250158	0.00557422
ENSMUSG00000036052	Dnajb5	56323	5646.97	-0.356574	0.0973995	-3.66095	0.000251285	0.00559269
ENSMUSG00000039159	Ube2h	22214	5636.26	-0.140369	0.0383449	-3.6607	0.000251523	0.00559269
ENSMUSG00000042784	Muc1	17829	34.4479	0.591266	0.161639	3.65795	0.000254244	0.0056354
ENSMUSG00000055044	Pdlim1	54132	279.271	-0.339709	0.0928628	-3.65818	0.000254009	0.0056354
ENSMUSG00000081957	Ak3l2-ps	635960	127.74	-0.322822	0.0882524	-3.65794	0.000254253	0.0056354
ENSMUSG00000001632	Brpf1	78783	1418.66	-0.156246	0.0427441	-3.65537	0.000256812	0.00567954
ENSMUSG00000032369	Plscr1	22038	86.4113	0.394103	0.107828	3.65492	0.000257258	0.00567954
ENSMUSG00000043415	Otud1	71198	857.732	-0.263265	0.0720223	-3.65532	0.000256857	0.00567954
ENSMUSG00000048787	Dcun1d3	233805	980.109	-0.195327	0.0534434	-3.65485	0.000257333	0.00567954
ENSMUSG00000079523	Tmsb10	19240	3377.95	0.299608	0.0819843	3.65446	0.000257724	0.00568218
ENSMUSG00000023341	Mx2	17858	63.1607	0.624306	0.171006	3.65078	0.000261444	0.0057526
ENSMUSG00000086296	D030055H07Rik	654798	52.5018	-0.595874	0.163219	-3.65076	0.000261469	0.0057526
ENSMUSG00000028234	Rps20	67427	3128.97	0.289951	0.0794497	3.64949	0.000262763	0.00577498
ENSMUSG00000056481	Cd248	70445	124.054	0.465883	0.127696	3.64837	0.000263906	0.005794
ENSMUSG00000079654	Prrt4	101359	172.152	0.347992	0.0954042	3.64755	0.000264753	0.0058065
ENSMUSG00000036959	Bcorl1	320376	1272.78	-0.251145	0.0688588	-3.64725	0.000265061	0.00580714
ENSMUSG00000032334	Loxl1	16949	104.334	0.416298	0.114159	3.64664	0.000265696	0.00581496
ENSMUSG00000020009	Ifngr1	15979	529.132	0.21845	0.0599262	3.64532	0.000267063	0.00583876
ENSMUSG00000071724	Smpd5	100503915	18.0743	0.678886	0.186282	3.64439	0.000268026	0.00585367
ENSMUSG00000010406	Mrpl52	68836	607.547	0.322005	0.0884001	3.64258	0.000269917	0.00588268
ENSMUSG00000043943	Naalad2	72560	95.9721	0.465176	0.127759	3.64106	0.00027152	0.00591144
ENSMUSG00000007617	Homer1	26556	6538.36	-0.451199	0.12395	-3.64016	0.000272468	0.0059259
ENSMUSG00000022439	Parvg	64099	300.046	0.280504	0.0770654	3.63982	0.000272832	0.00592764
ENSMUSG00000061298	Agbl4	78933	579.311	-0.17378	0.0477481	-3.63951	0.000273154	0.00592846
ENSMUSG00000021097	Clmn	94040	5386.22	-0.246675	0.0678019	-3.63817	0.00027458	0.00595315
ENSMUSG00000037708	Spag6	381350	111.15	-0.378036	0.103916	-3.63791	0.000274862	0.00595315
ENSMUSG00000048120	Entpd1	12495	498.426	0.287462	0.0790252	3.6376	0.000275195	0.0059542
ENSMUSG00000040380	Cbln3	56410	67.7501	1.83171	0.503667	3.63675	0.000276101	0.00596761
ENSMUSG00000039246	Lyplal1	226791	170.729	0.253029	0.0696568	3.6325	0.000280683	0.00606038
ENSMUSG00000040253	Gbp7	229900	247.867	0.478277	0.131695	3.63171	0.000281549	0.0060728
ENSMUSG00000091648	C2cd4d	271944	16.7653	0.765058	0.210824	3.6289	0.00028463	0.00613291
ENSMUSG00000005107	Slc2a9	117591	51.2648	0.413715	0.114017	3.62854	0.000285029	0.00613518
ENSMUSG00000084390	Gm15425	102637605	88.2442	-1.12454	0.310283	-3.62422	0.000289835	0.00623005
ENSMUSG00000086109	Gm13391	102632465	19.5626	0.576772	0.159151	3.62404	0.000290033	0.00623005
ENSMUSG00000042305	Tmem183a	57439	2794.63	0.129897	0.035847	3.62364	0.000290483	0.00623329
ENSMUSG00000042608	Stk40	74178	1508.94	-0.287839	0.0794603	-3.62243	0.000291849	0.00625617
ENSMUSG00000022838	Eaf2	106389	67.6101	0.342344	0.0945553	3.62056	0.000293963	0.00628655
ENSMUSG00000033208	S100b	20203	5033.71	0.272398	0.0752341	3.62068	0.000293835	0.00628655
ENSMUSG00000045382	Cxcr4	12767	67.9724	0.472724	0.130573	3.62038	0.000294169	0.00628655
ENSMUSG00000069094	Pde7a	18583	1392.93	-0.13727	0.0379186	-3.62012	0.000294471	0.00628656
ENSMUSG00000069682	Gm10275	19897	5906.36	0.302728	0.0836399	3.61942	0.000295267	0.00629713
ENSMUSG00000030126	Tmcc1	330401	3458.12	-0.120476	0.0332896	-3.61902	0.000295721	0.00630036
ENSMUSG00000038764	Ptpn3	545622	3213.69	-0.229945	0.0635459	-3.61857	0.000296232	0.00630482
ENSMUSG00000054199	Gon4l	76022	1890.8	-0.285249	0.0788414	-3.61801	0.000296878	0.00631214
ENSMUSG00000027298	Tyro3	22174	9170.64	-0.200418	0.0554076	-3.61716	0.000297856	0.00632648
ENSMUSG00000020097	Sgpl1	20397	1777.75	0.132291	0.0365897	3.61553	0.000299739	0.00635355
ENSMUSG00000027611	Procr	19124	29.5762	0.785298	0.217253	3.61467	0.000300725	0.00636799
ENSMUSG00000040424	Hipk4	233020	3372.13	-0.26025	0.0720163	-3.61376	0.000301793	0.00638413
ENSMUSG00000037148	Arhgap10	78514	775.652	-0.224561	0.0622125	-3.60959	0.000306685	0.00648104
ENSMUSG00000002797	Ggct	110175	536.425	0.219679	0.060922	3.6059	0.000311075	0.00656718
ENSMUSG00000008540	Mgst1	56615	311.341	0.385504	0.10696	3.60418	0.00031314	0.00660409
ENSMUSG00000021418	Rpp40	208366	251.925	0.173556	0.0481634	3.60349	0.000313976	0.00661504
ENSMUSG00000033554	Dph5	69740	382.473	0.189161	0.0525108	3.60232	0.000315396	0.00663825
ENSMUSG00000015013	Trappc2l	59005	1310.23	0.346271	0.0961495	3.60138	0.000316527	0.00665536
ENSMUSG00000024273	2700062C07Rik	68046	412.08	0.175877	0.0488457	3.60067	0.000317403	0.00666705
ENSMUSG00000046761	Fam83h	105732	183.031	0.351456	0.0976389	3.59955	0.000318769	0.00668903
ENSMUSG00000037816	Fbxw17	109082	421.4	0.168829	0.0469069	3.59923	0.00031916	0.0066905
ENSMUSG00000000223	Drp2	13497	4113.64	-0.140671	0.0390983	-3.59789	0.000320806	0.00671825
ENSMUSG00000026068	Il18rap	16174	9.19037	1.32321	0.367834	3.59729	0.000321547	0.00672704
ENSMUSG00000021928	Ebpl	68177	405.478	0.250568	0.0696998	3.59497	0.000324434	0.00678063
ENSMUSG00000033478	Fam160b1	226252	1700.91	-0.13797	0.0384102	-3.59202	0.00032812	0.00684398
ENSMUSG00000045876	Pcdhb8	93879	206.989	-0.374051	0.104129	-3.59219	0.000327916	0.00684398
ENSMUSG00000041845	Rhod	11854	22.8978	0.578336	0.161036	3.59135	0.000328967	0.0068548
ENSMUSG00000017667	Zfp334	228876	1376.75	-0.152209	0.0423861	-3.59102	0.000329389	0.00685675
ENSMUSG00000040102	Klhl42	232539	1455.45	-0.138233	0.0384989	-3.59056	0.000329965	0.00686189
ENSMUSG00000042111	Ccdc115	69668	681.443	0.183439	0.0511062	3.58937	0.000331473	0.00688639
ENSMUSG00000059149	Mfsd4a	213006	1797.83	-0.256814	0.0715667	-3.58846	0.000332636	0.00690368
ENSMUSG00000060477	Irak2	108960	743.297	-0.1847	0.0514842	-3.5875	0.000333859	0.00692218
ENSMUSG00000021179	Nrde2	217827	734.313	0.175539	0.0489393	3.58688	0.000334662	0.00693196
ENSMUSG00000022096	Hr	15460	1524.64	-0.272845	0.076091	-3.58577	0.000336088	0.0069546
ENSMUSG00000067038	Rps12-ps3	100034727	607.255	0.357451	0.0997208	3.58452	0.000337699	0.006981
ENSMUSG00000026788	Zbtb43	71834	1273.53	-0.130028	0.0362871	-3.58332	0.000339259	0.00700037
ENSMUSG00000046667	Rbm12b1	72397	333.21	-0.241263	0.0673301	-3.58328	0.000339306	0.00700037
ENSMUSG00000094825	Gm3194	100042054	28.2421	0.561281	0.156877	3.57784	0.000346448	0.00714066
ENSMUSG00000041974	Spidr	224008	126.494	0.336865	0.0942169	3.57542	0.000349663	0.00719273
ENSMUSG00000080859	Rpl10-ps1	100043391	1312.69	0.2684	0.0750629	3.57566	0.000349341	0.00719273
ENSMUSG00000030592	Ryr1	20190	1470.62	-0.423064	0.118345	-3.57483	0.000350451	0.00720183
ENSMUSG00000031838	Ifi30	65972	131.467	0.433159	0.121222	3.57326	0.000352567	0.00723529
ENSMUSG00000047904	Sstr2	20606	600.48	-0.418192	0.117058	-3.57251	0.000353569	0.00724453
ENSMUSG00000025880	Smad7	17131	1197.99	-0.195927	0.0548554	-3.57171	0.000354659	0.00725974
ENSMUSG00000044456	Rin3	217835	137.56	0.424356	0.118834	3.571	0.000355616	0.0072722
ENSMUSG00000020803	Txndc17	52700	931.928	0.23327	0.0653645	3.56876	0.000358677	0.00732254
ENSMUSG00000028475	Spaar	71406	34.5083	0.630429	0.176656	3.56868	0.000358779	0.00732254
ENSMUSG00000036822	Topors	106021	950.095	-0.149541	0.0419245	-3.56692	0.0003612	0.00736473
ENSMUSG00000042978	Sbk1	104175	2811.27	-0.269151	0.0754696	-3.56635	0.000361982	0.00736629
ENSMUSG00000104117	Gm20743	433374	49.7589	0.478341	0.134119	3.56653	0.000361733	0.00736629
ENSMUSG00000019088	Dnase1l1	69537	75.4883	0.333204	0.0935306	3.56251	0.000367319	0.00746763
ENSMUSG00000042182	Bend6	320705	7844.15	-0.377497	0.105974	-3.56215	0.000367829	0.00747071
ENSMUSG00000022346	Myc	17869	161.341	0.250099	0.0702348	3.5609	0.00036958	0.00749591
ENSMUSG00000048100	Taf13	99730	891.07	0.237593	0.0667255	3.56076	0.000369787	0.00749591
ENSMUSG00000069793	Slfn9	237886	37.8301	0.723926	0.203337	3.56022	0.00037054	0.00750388
ENSMUSG00000002108	Nr1h3	22259	155.524	0.334715	0.094032	3.55959	0.000371434	0.0075147
ENSMUSG00000032648	Pygm	19309	1310.59	-0.317239	0.0891289	-3.55932	0.000371814	0.00751511
ENSMUSG00000091556	Gm14569	101055983	11.7363	-0.981485	0.275846	-3.55809	0.00037356	0.00754309
ENSMUSG00000075581	Gm16409	100043734	2243.14	0.255193	0.0717749	3.55546	0.000377318	0.00761161
ENSMUSG00000040111	Gramd1b	235283	10200.1	-0.189037	0.0531748	-3.55501	0.000377966	0.00761732
ENSMUSG00000034707	Gns	75612	4165.11	0.158554	0.0446089	3.55431	0.000378975	0.00763031
ENSMUSG00000025198	Erlin1	226144	1122.2	-0.128459	0.0362097	-3.54765	0.00038868	0.00781816
ENSMUSG00000044442	N6amt1	67768	726.986	0.251494	0.0709303	3.54565	0.000391651	0.00787033
ENSMUSG00000020793	Galr2	14428	32.582	-0.7542	0.212761	-3.54482	0.00039288	0.00788744
ENSMUSG00000031778	Cx3cl1	20312	20882.9	-0.248057	0.069988	-3.54428	0.000393682	0.00789595
ENSMUSG00000029229	Chic2	74277	609.913	0.145227	0.0410034	3.54182	0.000397371	0.00796229
ENSMUSG00000034930	Rtkn	20166	671.014	-0.168086	0.0474739	-3.5406	0.000399216	0.00799159
ENSMUSG00000062461	Gm5453	432798	1095.05	0.344425	0.0972892	3.54022	0.000399789	0.0079954
ENSMUSG00000039501	Znfx1	98999	3380.68	-0.223588	0.0631734	-3.53928	0.000401221	0.00801636
ENSMUSG00000032434	Cmtm6	67213	1174.09	0.183612	0.0519018	3.53768	0.000403652	0.00805722
ENSMUSG00000021453	Gadd45g	23882	493.646	-0.372539	0.105327	-3.53698	0.00040473	0.00807102
ENSMUSG00000014747	Ankrd53	75305	86.9398	-0.489036	0.138291	-3.53628	0.000405799	0.00808461
ENSMUSG00000056258	Kcnq3	110862	8351.97	-0.248385	0.0702676	-3.53484	0.000408018	0.00812108
ENSMUSG00000040761	Spen	56381	4444.58	-0.322833	0.0913537	-3.53388	0.000409511	0.00814303
ENSMUSG00000031530	Dusp4	319520	454.326	-0.494061	0.140087	-3.52683	0.000420573	0.0083471
ENSMUSG00000060538	Tmem219	68742	250.401	0.221487	0.062797	3.52703	0.000420244	0.0083471
ENSMUSG00000015605	Srf	20807	2361.51	-0.204253	0.0579227	-3.5263	0.000421405	0.00835566
ENSMUSG00000048310	Pskh1	244631	449.072	0.235714	0.0668661	3.52517	0.00042321	0.00838348
ENSMUSG00000080746	Rpsa-ps12	666774	448.86	0.328341	0.0932385	3.52152	0.000429077	0.00849165
ENSMUSG00000075284	Wipf1	215280	654.601	0.207057	0.0588204	3.52016	0.000431286	0.00852729
ENSMUSG00000035401	Emsy	233545	1545.77	-0.210628	0.0598441	-3.51961	0.000432179	0.00853474
ENSMUSG00000038145	Snrk	20623	3948.39	-0.199208	0.0566063	-3.51918	0.000432889	0.00853474
ENSMUSG00000040829	Zmynd15	574428	39.8961	0.513374	0.145872	3.51935	0.000432601	0.00853474
ENSMUSG00000025092	Hspa12a	73442	9947.99	-0.189255	0.0537825	-3.51889	0.000433357	0.0085359
ENSMUSG00000086316	Nbdy	70123	903.564	0.211389	0.0600826	3.5183	0.000434322	0.00854685
ENSMUSG00000024013	Fgd2	26382	299.496	0.344165	0.0978387	3.51768	0.000435333	0.00855826
ENSMUSG00000039452	Snx22	382083	394.29	0.309866	0.088094	3.51745	0.000435721	0.00855826
ENSMUSG00000072812	Ahnak2	100041194	246.949	0.395999	0.112687	3.51414	0.000441179	0.00865731
ENSMUSG00000022125	Cln5	211286	587.802	0.160321	0.045636	3.51303	0.000443023	0.00868533
ENSMUSG00000031683	Lsm6	78651	1415.37	0.152508	0.0434183	3.51254	0.000443849	0.00869337
ENSMUSG00000027074	Slc43a3	58207	40.0568	0.791055	0.225288	3.51131	0.000445909	0.00872553
ENSMUSG00000096727	Psmb9	16912	73.5623	0.613169	0.174644	3.51096	0.000446499	0.00872888
ENSMUSG00000020605	Hs1bp3	58240	664.14	0.165263	0.0471016	3.50865	0.000450379	0.00878829
ENSMUSG00000029708	Gcc1	74375	996.502	-0.12833	0.0365752	-3.50867	0.000450357	0.00878829
ENSMUSG00000027883	Gpsm2	76123	548.678	-0.173892	0.0495658	-3.50831	0.000450958	0.00879136
ENSMUSG00000025538	Sumf2	67902	554.213	0.188698	0.0538185	3.5062	0.000454561	0.00885335
ENSMUSG00000030748	Il4ra	16190	284.353	0.355197	0.101457	3.50097	0.000463576	0.0090121
ENSMUSG00000025577	Cbx2	12416	125.096	-0.345825	0.0988351	-3.49901	0.00046699	0.00906939
ENSMUSG00000034413	Neurl1b	240055	2647.87	-0.231121	0.0660577	-3.49878	0.000467391	0.00906939
ENSMUSG00000070780	Rbm47	245945	39.1801	0.524697	0.150156	3.49434	0.000475228	0.00921289
ENSMUSG00000044949	Ubtd2	327900	457.95	-0.263335	0.0753733	-3.49375	0.000476284	0.00921908
ENSMUSG00000067274	Rplp0	11837	5727.63	0.235292	0.0673481	3.49367	0.00047643	0.00921908
ENSMUSG00000028126	Pip5k1a	18720	2419.1	-0.164577	0.047117	-3.49294	0.000477732	0.00922717
ENSMUSG00000040412	5330417C22Rik	229722	2165.19	-0.124398	0.0356134	-3.493	0.000477626	0.00922717
ENSMUSG00000029616	Erp29	67397	2388.28	0.230869	0.0661353	3.49085	0.000481478	0.00929093
ENSMUSG00000022451	Twf1	19230	1710.78	0.105775	0.0303168	3.48901	0.000484818	0.00934673
ENSMUSG00000092607	Scnm1	69269	716.715	0.425568	0.122033	3.48731	0.00048791	0.00939768
ENSMUSG00000022216	Psme1	19186	1266.93	0.208365	0.0597731	3.48593	0.000490437	0.00943764
ENSMUSG00000075463	4930594M22Rik	105245866	45.2717	0.533628	0.15311	3.48525	0.000491676	0.00945277
ENSMUSG00000074794	Arrdc3	105171	2004.87	-0.277555	0.0796488	-3.48474	0.000492612	0.00946204
ENSMUSG00000024165	Jpt2	52009	263.673	0.302965	0.0869879	3.48284	0.000496131	0.00949509
ENSMUSG00000037531	Mrpl47	74600	552.877	0.167957	0.0482241	3.48285	0.000496114	0.00949509
ENSMUSG00000049723	Mmp12	17381	50.1107	0.896952	0.257536	3.48283	0.000496151	0.00949509
ENSMUSG00000095295	Gm3488	100041735	40.3269	0.427923	0.122855	3.48315	0.000495552	0.00949509
ENSMUSG00000025794	Rpl14	67115	3009.15	0.337173	0.0968457	3.48155	0.000498526	0.0095318
ENSMUSG00000035329	Fbxo33	70611	2162.47	-0.198774	0.0571063	-3.48076	0.000499987	0.00955099
ENSMUSG00000028886	Eya3	14050	1498.75	-0.134341	0.0385986	-3.48046	0.000500559	0.00955317
ENSMUSG00000048696	Mex3d	237400	482.852	-0.204714	0.0588428	-3.479	0.000503281	0.00959635
ENSMUSG00000031805	Jak3	16453	362.798	0.315182	0.0906271	3.47779	0.000505572	0.00963123
ENSMUSG00000046410	Kcnk6	52150	182.138	0.233816	0.0672566	3.47648	0.00050805	0.00966081
ENSMUSG00000096929	A330023F24Rik	320977	3294.38	-0.35387	0.101788	-3.47653	0.000507944	0.00966081
ENSMUSG00000042340	Ctf1	13019	56.7453	0.364359	0.104893	3.47363	0.000513466	0.00975491
ENSMUSG00000022325	Pop1	67724	343.279	-0.298103	0.0858447	-3.47259	0.000515464	0.00978398
ENSMUSG00000081400	Gm13680	545429	195.16	0.378306	0.108967	3.47175	0.000517078	0.00980569
ENSMUSG00000041757	Plekha6	240753	6623.31	-0.190903	0.0549979	-3.47109	0.000518355	0.009821
ENSMUSG00000090667	Gm765	330390	73.6013	-0.881028	0.254003	-3.46857	0.000523243	0.00989564
ENSMUSG00000000901	Mmp11	17385	94.1351	0.332614	0.0959251	3.46743	0.000525452	0.00992844
ENSMUSG00000050567	Maml1	103806	553.718	-0.1867	0.0538818	-3.46499	0.000530255	0.0100011
ENSMUSG00000043733	Ptpn11	19247	8265.88	-0.133196	0.0384466	-3.46444	0.000531332	0.0100124
ENSMUSG00000025510	Cd151	12476	797.148	0.229909	0.0663977	3.4626	0.00053499	0.0100636
ENSMUSG00000069678	Pcgf1	69837	436.09	0.156609	0.045229	3.46258	0.000535014	0.0100636
ENSMUSG00000099764	Rps10-ps2	666274	3638.06	0.247717	0.0715498	3.46216	0.000535859	0.0100704
ENSMUSG00000054280	Prr14l	215476	3182.39	-0.209562	0.0605418	-3.46145	0.000537277	0.010088
ENSMUSG00000025417	Pip4k2c	117150	4206.82	-0.206848	0.0597939	-3.45935	0.000541474	0.0101485
ENSMUSG00000068154	Insm1	53626	207.314	-0.28632	0.082819	-3.45717	0.00054587	0.0102217
ENSMUSG00000043366	Olfr78	170639	47.627	-0.596527	0.172656	-3.45501	0.000550272	0.0102949
ENSMUSG00000020680	Taf15	70439	2761.77	0.226428	0.0655596	3.45378	0.000552796	0.0103097
ENSMUSG00000021371	Mcur1	76137	978.598	0.142666	0.0413087	3.45366	0.000553039	0.0103097
ENSMUSG00000030315	Vgll4	232334	1121.94	-0.232492	0.0673084	-3.45412	0.000552086	0.0103097
ENSMUSG00000022544	Eef2kmt	70511	144.379	0.217278	0.0629244	3.453	0.000554397	0.0103258
ENSMUSG00000024644	Cndp2	66054	1918.29	0.184094	0.0533321	3.45184	0.000556768	0.0103515
ENSMUSG00000100017	2410022M11Rik	100503842	174.713	0.354852	0.102798	3.45194	0.000556571	0.0103515
ENSMUSG00000034832	Tet3	194388	3246.66	-0.26504	0.0768418	-3.44916	0.000562338	0.0104458
ENSMUSG00000009214	Mymk	66139	10.2902	0.865546	0.250965	3.44887	0.000562944	0.0104477
ENSMUSG00000043572	Pars2	230577	310.932	0.225815	0.0655149	3.44678	0.000567319	0.0105196
ENSMUSG00000039634	Zfp189	230162	385.146	-0.336478	0.0977338	-3.4428	0.000575721	0.0106659
ENSMUSG00000042700	Sipa1l1	217692	15432.9	-0.217181	0.0630974	-3.442	0.000577427	0.010688
ENSMUSG00000078640	Gm11627	100040792	84.0722	-0.351607	0.102163	-3.44162	0.000578251	0.0106938
ENSMUSG00000051306	Usp42	76800	1066.72	-0.138362	0.0402197	-3.44015	0.000581397	0.0107425
ENSMUSG00000068758	Il3ra	16188	136.889	0.717709	0.208806	3.43721	0.000587746	0.0108502
ENSMUSG00000034892	Rps29	20090	7517.95	0.315786	0.0919242	3.43528	0.000591932	0.0109178
ENSMUSG00000063605	Ccdc102a	234582	57.1716	0.347185	0.10111	3.43373	0.000595338	0.0109709
ENSMUSG00000027661	Slc2a10	170441	72.9118	0.331139	0.0964699	3.43256	0.000597918	0.0110088
ENSMUSG00000031609	Sap30	60406	167.137	-0.347447	0.101327	-3.42897	0.000605871	0.0111355
ENSMUSG00000040033	Stat2	20847	1499.53	0.155862	0.0454845	3.42671	0.000610948	0.0112091
ENSMUSG00000028035	Dnajb4	67035	2751.55	-0.143433	0.0418606	-3.42645	0.000611522	0.0112098
ENSMUSG00000020431	Adcy1	432530	32941.7	-0.27379	0.0799328	-3.42525	0.000614225	0.0112495
ENSMUSG00000027893	Ahcyl1	229709	15997.8	-0.0995297	0.0290648	-3.42441	0.000616141	0.0112747
ENSMUSG00000022408	Fam83f	213956	25.8858	0.537636	0.157021	3.42399	0.000617094	0.0112754
ENSMUSG00000029471	Camkk2	207565	9796.99	-0.264481	0.0772461	-3.42388	0.000617344	0.0112754
ENSMUSG00000068523	Gng5	14707	519.465	0.245058	0.0715773	3.42368	0.000617803	0.0112754
ENSMUSG00000022983	Scaf4	224432	1741.54	-0.168168	0.0491273	-3.42311	0.000619093	0.0112793
ENSMUSG00000027716	Trpc3	22065	785.25	-0.188179	0.0549715	-3.42321	0.000618852	0.0112793
ENSMUSG00000047721	Bola2	66162	795.495	0.334592	0.0977777	3.42196	0.000621706	0.011317
ENSMUSG00000040139	9430038I01Rik	77252	101.389	0.326664	0.095486	3.42107	0.000623763	0.0113446
ENSMUSG00000097823	Gm16701	100503962	347.038	0.191252	0.0559311	3.41942	0.000627536	0.0114032
ENSMUSG00000032411	Tfdp2	211586	1850.76	-0.163169	0.0477234	-3.41905	0.000628399	0.011409
ENSMUSG00000052698	Tln2	70549	7100.52	-0.189673	0.0554806	-3.41873	0.000629141	0.0114125
ENSMUSG00000022033	Pbk	52033	13.7191	0.853704	0.249891	3.41631	0.000634765	0.0115046
ENSMUSG00000045934	Mtmr11	194126	239.939	0.267777	0.0784273	3.41434	0.000639371	0.011578
ENSMUSG00000039523	Cep104	230967	1912.28	-0.152323	0.0446394	-3.41229	0.000644193	0.0116552
ENSMUSG00000024136	Dnase1l2	66705	246.399	-0.503031	0.147483	-3.41078	0.000647779	0.0117099
ENSMUSG00000023008	Fmnl3	22379	736.321	0.233126	0.0683623	3.41015	0.000649265	0.0117266
ENSMUSG00000029328	Hnrnpdl	50926	9050.52	0.155253	0.0455484	3.40852	0.000653157	0.0117775
ENSMUSG00000089762	Ier5l	72500	552.688	-0.336128	0.0986146	-3.4085	0.00065321	0.0117775
ENSMUSG00000038957	Edc3	353190	1405.35	-0.12611	0.0370092	-3.40753	0.000655537	0.0118023
ENSMUSG00000000154	Slc22a18	18400	31.8678	0.578017	0.169707	3.40597	0.000659287	0.011836
ENSMUSG00000006134	Crkl	12929	1781.3	-0.223589	0.0656386	-3.40637	0.000658328	0.011836
ENSMUSG00000017830	Dhx58	80861	73.4569	0.352471	0.103486	3.40599	0.000659255	0.011836
ENSMUSG00000005983	1700037C18Rik	73261	191.702	0.288959	0.0848642	3.40496	0.000661738	0.0118596
ENSMUSG00000026880	Stom	13830	611.998	0.292237	0.0858215	3.40518	0.000661215	0.0118596
ENSMUSG00000027014	Cwc22	80744	856.686	0.138344	0.040633	3.40472	0.000662321	0.0118599
ENSMUSG00000022853	Ehhadh	74147	152.585	0.316316	0.0929358	3.4036	0.000665052	0.0118952
ENSMUSG00000028927	Padi2	18600	1764.3	0.283386	0.0832646	3.40344	0.000665436	0.0118952
ENSMUSG00000039899	Fgl2	14190	166.99	0.556329	0.16353	3.402	0.000668946	0.0119478
ENSMUSG00000047003	Zfp41	22701	268.693	0.169391	0.0498048	3.40109	0.000671165	0.0119771
ENSMUSG00000029650	Slc46a3	71706	275.901	0.215326	0.0633372	3.39969	0.000674634	0.0120288
ENSMUSG00000023272	Creld2	76737	536.179	-0.292418	0.0860333	-3.3989	0.000676584	0.0120516
ENSMUSG00000025429	Pstpip2	19201	200.147	-0.303641	0.0893507	-3.39831	0.000678044	0.0120516
ENSMUSG00000032109	Nlrx1	270151	333.295	0.239221	0.070389	3.39855	0.000677432	0.0120516
ENSMUSG00000063317	Usp31	76179	6069.31	-0.192649	0.0566923	-3.39815	0.000678429	0.0120516
ENSMUSG00000085886	D030047H15Rik	100037396	623.676	-0.359826	0.105893	-3.398	0.000678801	0.0120516
ENSMUSG00000030512	Snrpa1	68981	865.665	0.166766	0.0491011	3.39638	0.000682825	0.0121025
ENSMUSG00000084964	Gm15503	100043643	7.13997	0.911209	0.268272	3.39658	0.000682334	0.0121025
ENSMUSG00000029669	Tspan12	269831	758.964	0.214446	0.0631497	3.39584	0.000684173	0.0121077
ENSMUSG00000040705	A930016O22Rik	100503495	19.5398	0.664072	0.195557	3.3958	0.000684279	0.0121077
ENSMUSG00000002910	Arrdc2	70807	457.037	-0.576271	0.169748	-3.39487	0.000686614	0.0121284
ENSMUSG00000099881	2810013P06Rik	100503178	671.086	0.172492	0.0508085	3.39494	0.000686442	0.0121284
ENSMUSG00000081051	Gm15427	100041686	2039.54	0.307558	0.0906369	3.3933	0.000690569	0.012188
ENSMUSG00000037111	Setd7	73251	8792.96	-0.215621	0.0635594	-3.39243	0.000692759	0.0122163
ENSMUSG00000024736	Tmem132a	98170	4013.84	-0.319955	0.094329	-3.3919	0.00069409	0.0122191
ENSMUSG00000029624	Ptcd1	71799	822.758	-0.144117	0.042486	-3.3921	0.000693592	0.0122191
ENSMUSG00000002458	Rgs19	56470	649.579	0.188592	0.0556063	3.39155	0.000694975	0.0122244
ENSMUSG00000005718	Tfap4	83383	162.461	0.228834	0.0675118	3.38954	0.00070011	0.0123044
ENSMUSG00000026176	Ctdsp1	227292	873.323	0.206144	0.0608306	3.38882	0.000701935	0.0123261
ENSMUSG00000048747	E130114P18Rik	319865	147.868	0.296176	0.0874156	3.38814	0.000703694	0.0123466
ENSMUSG00000030495	Slc7a10	53896	849.074	-0.234314	0.069199	-3.38609	0.00070896	0.0124181
ENSMUSG00000036561	Ppp6r2	71474	3662.19	-0.16537	0.0488366	-3.3862	0.000708688	0.0124181
ENSMUSG00000034575	Tent4a	210106	1803.05	-0.157117	0.0464524	-3.38232	0.000718757	0.0125581
ENSMUSG00000045165	AI467606	101602	54.7666	0.392227	0.115959	3.38247	0.000718373	0.0125581
ENSMUSG00000001018	Snapin	20615	1623.83	0.151582	0.0448239	3.38173	0.000720298	0.0125745
ENSMUSG00000025701	Alox5	11689	67.6195	0.553397	0.163665	3.38127	0.000721505	0.012585
ENSMUSG00000038179	Slamf7	75345	8.27978	1.30048	0.384875	3.37898	0.000727559	0.0126777
ENSMUSG00000038773	Kdm3b	277250	2759.36	-0.106996	0.0316669	-3.3788	0.000728033	0.0126777
ENSMUSG00000020377	Ltc4s	17001	30.2984	0.481561	0.142556	3.37804	0.000730036	0.012702
ENSMUSG00000019947	Arid5b	71371	824.835	-0.372819	0.110517	-3.37342	0.000742403	0.0129064
ENSMUSG00000041037	Irgq	210146	5191.9	-0.198979	0.0590039	-3.3723	0.000745419	0.0129481
ENSMUSG00000028413	B4galt1	14595	293.79	0.253458	0.0751926	3.37078	0.000749557	0.0129983
ENSMUSG00000002222	Rmnd5a	68477	6598.94	-0.150239	0.0445785	-3.37022	0.000751086	0.0130027
ENSMUSG00000017756	Slc12a7	20499	247.719	0.448988	0.133232	3.36997	0.00075177	0.0130027
ENSMUSG00000020474	Polm	54125	327.567	0.222961	0.0661626	3.3699	0.000751968	0.0130027
ENSMUSG00000032536	Trak1	67095	6368.07	-0.171317	0.0508471	-3.36925	0.000753719	0.0130165
ENSMUSG00000022010	Tsc22d1	21807	15292.7	-0.125012	0.0371212	-3.36766	0.00075808	0.013081
ENSMUSG00000048216	Gpr85	64450	1405.21	0.157947	0.0469113	3.36693	0.000760099	0.013105
ENSMUSG00000025505	Tmem80	71448	1084.82	0.138082	0.0410223	3.36601	0.000762637	0.013127
ENSMUSG00000050947	Amigo1	229715	5060.74	-0.126026	0.0374402	-3.36606	0.000762494	0.013127
ENSMUSG00000007892	Rplp1	56040	13505.8	0.325413	0.0966891	3.36556	0.000763882	0.0131376
ENSMUSG00000024875	Yif1a	68090	477.995	0.166701	0.049553	3.3641	0.000767949	0.013175
ENSMUSG00000029762	Akr1b8	14187	34.4453	0.508211	0.151067	3.36414	0.000767816	0.013175
ENSMUSG00000030605	Mfge8	17304	5183.19	-0.270224	0.0803224	-3.36424	0.000767558	0.013175
ENSMUSG00000019779	Frk	14302	23.1439	0.791238	0.235229	3.36369	0.00076908	0.0131836
ENSMUSG00000056735	A930024E05Rik	109202	107.112	0.264904	0.07876	3.36343	0.000769795	0.013185
ENSMUSG00000026928	Card9	332579	159.363	0.292359	0.0869518	3.36231	0.000772944	0.0132281
ENSMUSG00000025290	Rps24	20088	5580.33	0.309468	0.0920545	3.36179	0.000774377	0.0132404
ENSMUSG00000035212	Leprot	230514	979.511	0.138267	0.0411314	3.3616	0.00077493	0.0132404
ENSMUSG00000038510	Rpf2	67239	576.327	0.189287	0.0563198	3.36093	0.00077681	0.0132546
ENSMUSG00000090125	Pou3f1	18991	839.198	-0.252621	0.0751659	-3.36085	0.000777033	0.0132546
ENSMUSG00000015143	Actn1	109711	3654.3	-0.161783	0.0481468	-3.3602	0.000778873	0.013258
ENSMUSG00000024826	Dpf2	19708	2188.87	-0.145812	0.0433981	-3.35988	0.000779768	0.013258
ENSMUSG00000027195	Hsd17b12	56348	2626.7	0.177111	0.0527084	3.36021	0.000778842	0.013258
ENSMUSG00000030616	Sytl2	83671	2372.95	-0.255078	0.0759164	-3.35998	0.000779483	0.013258
ENSMUSG00000049988	Lrrc25	211228	24.8697	0.651553	0.193955	3.35929	0.000781416	0.0132752
ENSMUSG00000028961	Pgd	110208	1560.08	0.130517	0.0388588	3.35876	0.000782939	0.0132902
ENSMUSG00000057841	Rpl32	19951	5808.24	0.272048	0.081017	3.35791	0.000785336	0.0133201
ENSMUSG00000047676	Rpsa-ps10	100040633	2073.5	0.332842	0.0991566	3.35673	0.000788709	0.0133664
ENSMUSG00000045316	Fahd1	68636	585.137	0.199593	0.0594742	3.35596	0.000790896	0.0133926
ENSMUSG00000003032	Klf4	16600	182.184	-0.548522	0.163486	-3.35517	0.000793167	0.0134202
ENSMUSG00000037725	Ckap2	80986	22.7074	0.613707	0.183001	3.35358	0.000797743	0.0134867
ENSMUSG00000092730	Snora24	100306957	17.3608	0.590122	0.176009	3.3528	0.000799987	0.0135137
ENSMUSG00000028333	Anp32b	67628	1772.79	0.153168	0.0456933	3.35208	0.00080207	0.0135379
ENSMUSG00000007570	Fance	72775	688.196	0.18715	0.0558504	3.35091	0.000805459	0.0135841
ENSMUSG00000020641	Rsad2	58185	65.5332	0.58997	0.176134	3.34955	0.000809431	0.0136291
ENSMUSG00000028597	Gpx7	67305	98.3529	0.311224	0.0929242	3.34923	0.000810373	0.013634
ENSMUSG00000036718	Micall2	231830	117.181	0.362557	0.10828	3.34833	0.000812993	0.013667
ENSMUSG00000039536	Stau1	20853	2780.83	-0.0980529	0.0292887	-3.34781	0.00081453	0.0136819
ENSMUSG00000060791	Gmfg	63986	28.8377	0.55811	0.166725	3.3475	0.000815452	0.0136864
ENSMUSG00000066180	Gm10155	100043495	267.616	0.319989	0.0956629	3.34497	0.000822924	0.0137896
ENSMUSG00000022507	1810013L24Rik	69053	2675.91	-0.132765	0.0396942	-3.34469	0.000823759	0.0137925
ENSMUSG00000046470	Sox18	20672	148.268	0.50261	0.150299	3.34406	0.00082562	0.0138126
ENSMUSG00000030102	Itpr1	16438	25037.7	-0.285357	0.0853744	-3.34242	0.000830516	0.0138834
ENSMUSG00000038539	Atf5	107503	679.318	0.289432	0.0866064	3.34192	0.000832009	0.0138962
ENSMUSG00000057637	Prdm2	110593	3645.1	-0.208085	0.0622688	-3.34172	0.000832616	0.0138962
ENSMUSG00000007656	Arpp19	59046	11962.4	-0.242564	0.0725972	-3.34123	0.000834075	0.0139095
ENSMUSG00000029516	Cit	12704	8097.88	-0.249886	0.074808	-3.34037	0.000836672	0.0139305
ENSMUSG00000099032	Tcf24	100039596	21.2048	0.601298	0.180001	3.34052	0.000836206	0.0139305
ENSMUSG00000022426	Josd1	74158	3415.27	-0.137384	0.0411416	-3.3393	0.000839908	0.0139621
ENSMUSG00000050299	Gm9843	100039316	5605.62	0.326975	0.0979343	3.33872	0.000841651	0.01398
ENSMUSG00000033590	Myo5c	208943	321.048	-0.323587	0.0969295	-3.33837	0.000842708	0.0139864
ENSMUSG00000074657	Kif5a	16572	105586	-0.14878	0.0445833	-3.33711	0.000846541	0.0140389
ENSMUSG00000065475	Mir27b	387221	40.3146	-0.478828	0.143517	-3.33639	0.000848734	0.0140641
ENSMUSG00000009927	Rps25	75617	4050.44	0.249481	0.0748131	3.33473	0.000853835	0.014115
ENSMUSG00000021738	Atxn7	246103	1447.06	-0.174301	0.052263	-3.33508	0.000852748	0.014115
ENSMUSG00000031994	Adamts8	30806	146.48	-0.264085	0.0791922	-3.33474	0.0008538	0.014115
ENSMUSG00000032436	Cmtm7	102545	74.2507	0.399024	0.11975	3.33213	0.000861828	0.0142359
ENSMUSG00000031967	Afg3l1	114896	1664.99	0.142816	0.0428685	3.33149	0.000863815	0.0142525
ENSMUSG00000037440	Vnn1	22361	15.1699	1.12841	0.338722	3.33137	0.000864202	0.0142525
ENSMUSG00000008604	Ubqln4	94232	5526.94	-0.155469	0.0466727	-3.33105	0.000865183	0.0142574
ENSMUSG00000001036	Epn2	13855	5421.3	-0.0822054	0.0247009	-3.32804	0.000874599	0.0143785
ENSMUSG00000028943	Espn	56226	209.371	-0.29015	0.0871803	-3.32816	0.000874214	0.0143785
ENSMUSG00000031765	Mt1	17748	5850.11	0.38112	0.114514	3.32816	0.000874228	0.0143785
ENSMUSG00000057113	Npm1	18148	5134.59	0.178065	0.0535275	3.32661	0.0008791	0.0144412
ENSMUSG00000048581	E130311K13Rik	329659	305.555	0.233291	0.0701517	3.32552	0.000882527	0.0144861
ENSMUSG00000045838	Ccdc9b	214239	507.011	0.290039	0.087267	3.32358	0.00088869	0.0145758
ENSMUSG00000090124	Ugt1a7c	394432	12.9489	0.853738	0.256981	3.32218	0.000893161	0.0146376
ENSMUSG00000021248	Tmed10	68581	6123.75	0.103844	0.0312637	3.32155	0.000895175	0.0146591
ENSMUSG00000041548	Hspb8	80888	582.213	0.281479	0.0847766	3.32024	0.000899387	0.0147165
ENSMUSG00000026321	Tnfrsf11a	21934	284.506	0.197407	0.0594674	3.31959	0.000901507	0.0147397
ENSMUSG00000018143	Mafk	17135	412.028	-0.206865	0.0623412	-3.31827	0.00090578	0.0147979
ENSMUSG00000038664	Herc1	235439	11204.2	-0.195517	0.0589994	-3.31389	0.000920086	0.0149965
ENSMUSG00000049928	Glp2r	93896	140.516	-0.503002	0.151781	-3.314	0.000919714	0.0149965
ENSMUSG00000091034	Gm17660	100271704	12.6612	0.762241	0.230003	3.31405	0.000919559	0.0149965
ENSMUSG00000005150	Wdr83	67836	755.223	0.177757	0.0536512	3.3132	0.000922353	0.01501
ENSMUSG00000026864	Hspa5	14828	9747.09	-0.289845	0.0874792	-3.3133	0.000922012	0.01501
ENSMUSG00000007837	Prrg2	65116	176.119	0.230443	0.0695593	3.31289	0.000923367	0.0150148
ENSMUSG00000059991	Nptx2	53324	1632.49	-0.413617	0.124901	-3.31156	0.00092777	0.0150746
ENSMUSG00000041794	Myrip	245049	2968.27	-0.188577	0.0569758	-3.30977	0.000933727	0.0151596
ENSMUSG00000091472	Gm3739	100042235	75.201	0.347558	0.105022	3.30939	0.000935	0.0151685
ENSMUSG00000041720	Pi4ka	224020	14738.5	-0.208638	0.0630627	-3.30842	0.000938235	0.0152081
ENSMUSG00000099094	Gm19569	100503134	15.4553	0.673296	0.203522	3.30822	0.000938895	0.0152081
ENSMUSG00000032431	Crtap	56693	189.512	0.255947	0.077383	3.30754	0.000941199	0.0152336
ENSMUSG00000029104	Htt	15194	9261.78	-0.190014	0.0574618	-3.30679	0.000943709	0.0152624
ENSMUSG00000067288	Rps28	54127	1878.83	0.276344	0.0836074	3.30526	0.000948899	0.0153344
ENSMUSG00000006281	Tep1	21745	410	0.26495	0.0802719	3.30066	0.000964594	0.015576
ENSMUSG00000028567	Txndc12	66073	934.033	0.162529	0.0492619	3.29928	0.000969323	0.0156403
ENSMUSG00000033863	Klf9	16601	4420.23	-0.330966	0.100349	-3.29816	0.000973217	0.0156891
ENSMUSG00000040687	Madd	228355	11099.1	-0.169541	0.0514077	-3.29797	0.000973854	0.0156891
ENSMUSG00000056962	Jmjd6	107817	914.708	-0.180861	0.054853	-3.2972	0.000976536	0.0157202
ENSMUSG00000048489	Depp1	213393	34.2409	-1.03263	0.313241	-3.29659	0.000978667	0.0157424
ENSMUSG00000045691	Thtpa	105663	915.526	0.168379	0.0510852	3.29604	0.000980594	0.0157612
ENSMUSG00000079418	Atg4a	666468	269.065	0.203732	0.0618404	3.29448	0.000986054	0.0158368
ENSMUSG00000055675	Kbtbd11	74901	4737.06	-0.139133	0.0422566	-3.29257	0.000992779	0.0159081
ENSMUSG00000083907	Plk-ps1	18818	59.4693	-0.398813	0.121115	-3.29286	0.000991741	0.0159081
ENSMUSG00000053553	3110082I17Rik	73212	262.912	0.212294	0.0644851	3.29214	0.000994277	0.0159199
ENSMUSG00000025044	Msr1	20288	21.1624	1.28264	0.389736	3.29105	0.000998157	0.0159697
ENSMUSG00000022622	Acr	11434	82.1147	0.432946	0.131572	3.29056	0.000999865	0.0159848
ENSMUSG00000063316	Rpl27	19942	3450.21	0.229962	0.0699236	3.28876	0.0010063	0.0160753
ENSMUSG00000071648	Rom1	19881	256.971	0.286568	0.0871582	3.28791	0.00100935	0.0161117
ENSMUSG00000020783	Ncbp3	66874	851.98	-0.140936	0.0428869	-3.28622	0.00101543	0.0161718
ENSMUSG00000028550	Atg4c	242557	1727.52	-0.176926	0.0538333	-3.28656	0.0010142	0.0161718
ENSMUSG00000032220	Myo1e	71602	666.755	0.280479	0.0853479	3.2863	0.00101512	0.0161718
ENSMUSG00000040006	Ginm1	215751	517.67	0.149496	0.0455056	3.28522	0.00101903	0.0162167
ENSMUSG00000020340	Cyfip2	76884	36191.9	-0.24207	0.0736911	-3.28492	0.0010201	0.0162214
ENSMUSG00000020021	Fgd6	13998	788.057	-0.242114	0.0737155	-3.28444	0.00102185	0.0162288
ENSMUSG00000050035	Fhl4	14202	32.8001	0.497569	0.151496	3.28437	0.00102212	0.0162288
ENSMUSG00000097318	1700007L15Rik	100502742	15.7672	0.582214	0.1773	3.28377	0.00102428	0.0162507
ENSMUSG00000049791	Fzd4	14366	216.563	-0.375089	0.114249	-3.28308	0.00102679	0.0162782
ENSMUSG00000032577	Mapkapk3	102626	130.267	0.340671	0.103836	3.28087	0.00103486	0.0163802
ENSMUSG00000052384	Nrros	224109	278.658	0.294419	0.0897385	3.28086	0.00103493	0.0163802
ENSMUSG00000066441	Rdh11	17252	1159.82	0.192651	0.0587315	3.28021	0.00103731	0.0163952
ENSMUSG00000021466	Ptch1	19206	3166.65	-0.203219	0.0619855	-3.2785	0.00104361	0.0164712
ENSMUSG00000026496	Parp1	11545	3141.36	-0.132559	0.0404331	-3.27847	0.0010437	0.0164712
ENSMUSG00000063239	Grm4	268934	1559.21	-0.244893	0.0747059	-3.27809	0.00104512	0.0164811
ENSMUSG00000078193	Gm2000	100038991	1822.18	0.377909	0.115315	3.2772	0.00104843	0.0165209
ENSMUSG00000022365	Derl1	67819	2851.19	0.116409	0.0355434	3.27512	0.00105616	0.0166301
ENSMUSG00000020251	Glt8d2	74782	421.976	-0.36432	0.111305	-3.27318	0.00106346	0.0167324
ENSMUSG00000031511	Arhgef7	54126	5541.78	-0.115341	0.0352406	-3.27296	0.00106428	0.0167328
ENSMUSG00000024334	H2-Oa	15001	9.47477	1.04719	0.319996	3.27251	0.00106597	0.0167468
ENSMUSG00000005417	Mprip	26936	14617.3	-0.159636	0.0487913	-3.27181	0.0010686	0.0167544
ENSMUSG00000021786	Oxsm	71147	403.917	0.182706	0.0558366	3.27216	0.00106729	0.0167544
ENSMUSG00000090386	Mir99ahg	77994	255.571	0.382799	0.117001	3.27174	0.00106887	0.0167544
ENSMUSG00000020142	Slc1a4	55963	2800.05	0.181269	0.0554378	3.26978	0.00107631	0.0168427
ENSMUSG00000024030	Abcg1	11307	2349.94	-0.190717	0.0583246	-3.26992	0.00107576	0.0168427
ENSMUSG00000024038	Ndufv3	78330	2119.14	0.215181	0.0658167	3.2694	0.00107777	0.0168427
ENSMUSG00000051652	Lrrc3	237387	616.449	0.169111	0.0517287	3.2692	0.00107853	0.0168427
ENSMUSG00000057469	E2f6	50496	1287.13	-0.146071	0.0446758	-3.26959	0.00107705	0.0168427
ENSMUSG00000042772	Smg7	226517	4649	-0.148068	0.0452958	-3.26891	0.00107963	0.0168473
ENSMUSG00000025176	Hoga1	67432	36.6245	0.471132	0.144175	3.26777	0.001084	0.0168993
ENSMUSG00000030029	Lrig1	16206	2031.15	0.261575	0.0800507	3.26761	0.00108459	0.0168993
ENSMUSG00000020956	Dtd2	328092	331.908	0.192033	0.0587756	3.26723	0.00108605	0.0169095
ENSMUSG00000030104	Edem1	192193	1169.31	0.148456	0.0454713	3.26483	0.00109532	0.0170411
ENSMUSG00000079235	Ccdc13	100502861	248.013	0.264061	0.0808876	3.26454	0.00109642	0.0170455
ENSMUSG00000020901	Pik3r5	320207	214.189	0.255927	0.0784011	3.26433	0.00109724	0.0170457
ENSMUSG00000039738	Slx4	52864	1336.54	-0.17541	0.0537391	-3.2641	0.00109814	0.0170469
ENSMUSG00000008730	Hipk1	15257	6082.46	-0.137682	0.0422062	-3.26213	0.00110577	0.0171398
ENSMUSG00000018736	Ndel1	83431	3325.69	-0.156635	0.0480149	-3.26222	0.00110544	0.0171398
ENSMUSG00000060212	Pcnx2	270109	4659.53	-0.201609	0.0618179	-3.26133	0.0011089	0.0171628
ENSMUSG00000082895	Rpsa-ps9	665412	89.4975	0.503086	0.154249	3.26152	0.00110818	0.0171628
ENSMUSG00000102117	Rpsa-ps1	665237	566.336	0.381014	0.11684	3.261	0.00111021	0.0171704
ENSMUSG00000074063	Osgin1	71839	28.4246	0.4552	0.139706	3.25827	0.00112096	0.017311
ENSMUSG00000054728	Phactr1	218194	17351.2	-0.156316	0.0479806	-3.2579	0.0011224	0.0173205
ENSMUSG00000074489	Bglap3	12095	38.7242	-0.57689	0.177211	-3.25538	0.00113242	0.0174622
ENSMUSG00000003161	Sri	109552	2114.32	0.122769	0.0377229	3.25451	0.00113589	0.0175028
ENSMUSG00000010517	Faf1	14084	1492.16	0.102816	0.0316027	3.25338	0.00114042	0.0175596
ENSMUSG00000022237	Ankrd33b	67434	4226.92	-0.303683	0.0933606	-3.25279	0.00114277	0.0175699
ENSMUSG00000029570	Lfng	16848	664.924	-0.301467	0.0926786	-3.25282	0.00114264	0.0175699
ENSMUSG00000032372	Plscr2	18828	153.541	0.562582	0.172981	3.25227	0.00114488	0.017577
ENSMUSG00000044338	Aplnr	23796	21.2675	0.901939	0.277327	3.25226	0.00114492	0.017577
ENSMUSG00000026571	Dcaf6	74106	3401.28	-0.128533	0.0395287	-3.25164	0.00114741	0.0176024
ENSMUSG00000044345	Marveld1	277010	378.801	0.219617	0.0675789	3.24978	0.00115494	0.0177049
ENSMUSG00000038312	Edem2	108687	979.126	0.221257	0.0681008	3.24897	0.00115823	0.0177423
ENSMUSG00000090862	Rps13	68052	3361.15	0.229416	0.0706296	3.24816	0.00116154	0.0177799
ENSMUSG00000033658	Ddx19b	234733	1670.25	-0.135495	0.0417428	-3.24595	0.00117059	0.0179053
ENSMUSG00000030623	Prss23os	108167445	8.13004	-1.0068	0.3107	-3.24042	0.00119353	0.0182428
ENSMUSG00000032418	Me1	17436	2069.71	0.129169	0.0398703	3.23972	0.00119647	0.018261
ENSMUSG00000047342	Zfp286	192651	635.269	0.143604	0.0443244	3.23984	0.00119599	0.018261
ENSMUSG00000001289	Pfdn5	56612	4387.8	0.246677	0.0761521	3.23927	0.00119836	0.0182765
ENSMUSG00000048482	Bdnf	12064	1057	-0.312796	0.0965791	-3.23876	0.00120052	0.0182961
ENSMUSG00000005233	Spc25	66442	20.6257	0.542589	0.167606	3.23729	0.00120669	0.0183767
ENSMUSG00000029413	Naaa	67111	922.244	0.294454	0.0909704	3.23681	0.00120872	0.0183943
ENSMUSG00000025647	Shisa5	66940	1759.71	0.191905	0.0592941	3.23649	0.00121011	0.018402
ENSMUSG00000038780	Smurf1	75788	2375.39	-0.121748	0.0376247	-3.23584	0.00121284	0.0184033
ENSMUSG00000097204	Gm17690	100504127	36.9491	0.411848	0.127266	3.23613	0.00121162	0.0184033
ENSMUSG00000097075	Cdiptos	381922	97.4096	-0.484577	0.149767	-3.23554	0.00121415	0.0184098
ENSMUSG00000004945	Tmem242	70544	1482.82	0.20807	0.0643152	3.23516	0.00121573	0.0184203
ENSMUSG00000071532	Gm10335	100039571	4077.51	0.231722	0.0716412	3.23448	0.00121866	0.0184514
ENSMUSG00000055491	Pprc1	226169	1332.31	-0.206309	0.063817	-3.23283	0.00122572	0.0185448
ENSMUSG00000033161	Atp1a1	11928	30143.9	-0.335689	0.103859	-3.23217	0.00122853	0.0185739
ENSMUSG00000028698	Pik3r3	18710	2656.57	-0.165427	0.0511925	-3.23146	0.00123159	0.0185966
ENSMUSG00000067714	Lpar5	381810	16.3307	0.592918	0.183486	3.23141	0.00123182	0.0185966
ENSMUSG00000087578	Ccdc142os	102635447	31.3112	0.476655	0.147537	3.23074	0.0012347	0.0186266
ENSMUSG00000024789	Jak2	16452	2138.9	-0.172731	0.0534838	-3.2296	0.00123966	0.0186879
ENSMUSG00000001418	Glmp	56700	1310.1	0.183991	0.0570626	3.22437	0.00126248	0.0190183
ENSMUSG00000069662	Marcks	17118	7855.94	0.209153	0.0648883	3.22328	0.0012673	0.0190771
ENSMUSG00000020288	Ahsa2	268390	747.8	-0.175626	0.0545257	-3.22098	0.00127753	0.0191759
ENSMUSG00000054072	Iigp1	60440	75.2814	0.845225	0.262363	3.22158	0.00127485	0.0191759
ENSMUSG00000065561	Mir369	723933	11.9581	-0.686115	0.212993	-3.2213	0.00127611	0.0191759
ENSMUSG00000000934	Top1mt	72960	556.52	0.155745	0.0483735	3.21964	0.00128352	0.0192519
ENSMUSG00000045659	Plekha7	233765	1700.99	-0.202508	0.0629259	-3.2182	0.00129	0.0193351
ENSMUSG00000041528	Rnf123	84585	2392.94	-0.169769	0.0527684	-3.21724	0.00129431	0.0193858
ENSMUSG00000028262	Clca3a2	80797	10.4905	0.783803	0.243695	3.21633	0.00129843	0.0194337
ENSMUSG00000040565	Btaf1	107182	1793.34	-0.227065	0.0706121	-3.21567	0.00130141	0.0194643
ENSMUSG00000038044	Cct8l1	242891	13.8704	-0.656161	0.204083	-3.21516	0.0013037	0.0194739
ENSMUSG00000040003	Magi2	50791	4304.61	-0.178367	0.0554776	-3.21512	0.00130392	0.0194739
ENSMUSG00000054931	Zkscan4	544922	174.184	0.220716	0.068673	3.21401	0.00130893	0.0195113
ENSMUSG00000074039	4930520O04Rik	75116	65.8563	0.331489	0.10314	3.21397	0.00130914	0.0195113
ENSMUSG00000082193	Rpl5-ps1	665407	2657.2	0.229608	0.0714412	3.21395	0.00130922	0.0195113
ENSMUSG00000026832	Cytip	227929	17.1646	0.740423	0.230461	3.2128	0.00131448	0.0195756
ENSMUSG00000060198	Gm11353	100042180	2104.23	0.225567	0.0702306	3.21181	0.00131903	0.0196294
ENSMUSG00000039716	Dock3	208869	9999.06	-0.271865	0.0846567	-3.21138	0.00132098	0.0196444
ENSMUSG00000068062	Gm14164	791417	133.928	0.353993	0.110247	3.21091	0.00132316	0.0196628
ENSMUSG00000044026	Slc35g1	240660	146.085	0.307291	0.0957206	3.21029	0.00132599	0.0196909
ENSMUSG00000029512	Ulk1	22241	3708.25	-0.196715	0.0612928	-3.20944	0.00132996	0.0197358
ENSMUSG00000020709	Adap2	216991	162.413	0.368936	0.114994	3.20831	0.00133519	0.0197993
ENSMUSG00000041842	Fhdc1	229474	420.136	-0.301152	0.0938751	-3.208	0.0013366	0.0198062
ENSMUSG00000038132	Rbm24	666794	704.737	-0.186421	0.0581318	-3.20686	0.00134193	0.019871
ENSMUSG00000044199	S1pr4	13611	18.5881	0.692448	0.215942	3.20664	0.00134296	0.0198722
ENSMUSG00000075555	Gm10863	100041655	66.6474	0.618983	0.193094	3.20561	0.00134777	0.0199292
ENSMUSG00000037010	Apln	30878	813.684	-0.303082	0.0945861	-3.20429	0.00135394	0.0200063
ENSMUSG00000037260	Hgsnat	52120	1927.39	-0.167952	0.0524393	-3.20279	0.00136104	0.020097
ENSMUSG00000028328	Tmod1	21916	1146.09	-0.197653	0.0617296	-3.20191	0.00136521	0.0201443
ENSMUSG00000031595	Pdgfrl	68797	41.6871	0.522758	0.163297	3.20126	0.00136826	0.0201751
ENSMUSG00000075273	Ttc30b	72421	527.399	0.219105	0.0684533	3.2008	0.00137047	0.0201934
ENSMUSG00000027244	Atg13	51897	4252.73	-0.112885	0.0352872	-3.19904	0.00137888	0.020303
ENSMUSG00000030888	Rrp8	101867	398.018	-0.211841	0.0662405	-3.19805	0.00138359	0.0203579
ENSMUSG00000039067	Psmd7	17463	3466.86	0.113812	0.0356065	3.1964	0.00139155	0.0204607
ENSMUSG00000040857	Erf	13875	1993.72	-0.211269	0.0661237	-3.19505	0.00139805	0.0205417
ENSMUSG00000009670	Tex11	83558	21.079	0.779752	0.244244	3.19251	0.00141042	0.020709
ENSMUSG00000033948	Zswim5	74464	784.706	-0.152866	0.047892	-3.1919	0.00141343	0.0207385
ENSMUSG00000074129	Rpl13a	22121	14870.4	0.312778	0.0980254	3.19079	0.00141886	0.0208037
ENSMUSG00000078606	Gm4070	100042856	262.672	0.698515	0.218965	3.19007	0.00142237	0.0208404
ENSMUSG00000007833	Aldh16a1	69748	271.516	0.225989	0.0708697	3.1888	0.00142864	0.0209176
ENSMUSG00000029715	Pop7	74097	429.956	0.228822	0.0717715	3.1882	0.0014316	0.0209463
ENSMUSG00000061315	Naca	17938	6521.4	0.150916	0.0473656	3.18619	0.00144159	0.0210777
ENSMUSG00000032010	Usp2	53376	2740.97	-0.197624	0.0620344	-3.18572	0.00144394	0.0210826
ENSMUSG00000074676	Foxs1	14239	10.748	0.81846	0.256905	3.18584	0.00144333	0.0210826
ENSMUSG00000028861	Mrps15	66407	1229.21	0.164469	0.051655	3.18398	0.00145265	0.0211666
ENSMUSG00000029510	Gpc2	71951	143.725	0.34055	0.106948	3.18425	0.00145131	0.0211666
ENSMUSG00000073002	Vamp5	53620	83.6628	0.375004	0.117787	3.18376	0.00145375	0.0211666
ENSMUSG00000102344	9430053O09Rik	102633149	52.5657	0.396779	0.124625	3.18378	0.00145368	0.0211666
ENSMUSG00000037946	Fgd3	30938	547.621	0.223304	0.0702218	3.17998	0.00147284	0.0214147
ENSMUSG00000074213	Gm10642	100379146	10.1736	0.69201	0.217631	3.17974	0.00147408	0.0214177
ENSMUSG00000049225	Pdp1	381511	6406.55	-0.219232	0.0689803	-3.17819	0.00148197	0.0215174
ENSMUSG00000021457	Syk	20963	197.495	0.266795	0.0840117	3.17568	0.00149483	0.0216741
ENSMUSG00000031807	Pgls	66171	670.275	0.25055	0.0789259	3.1745	0.00150094	0.0217474
ENSMUSG00000021773	Comtd1	69156	88.3926	0.3475	0.109524	3.17281	0.00150971	0.0218292
ENSMUSG00000039774	Galnt12	230145	78.3115	0.323749	0.102035	3.17291	0.00150919	0.0218292
ENSMUSG00000028139	Riiad1	66353	69.9244	0.545432	0.17197	3.17168	0.0015156	0.0218839
ENSMUSG00000042724	Map3k9	338372	4516.77	-0.232349	0.0732853	-3.17047	0.00152194	0.0219604
ENSMUSG00000047238	Mageh1	75625	1197.04	0.169858	0.0535852	3.16986	0.00152511	0.0219767
ENSMUSG00000047669	Msl3l2	73390	512.428	0.181908	0.0573907	3.16965	0.00152623	0.0219767
ENSMUSG00000101225	1700008J07Rik	629159	63.848	0.287841	0.0908117	3.16965	0.00152621	0.0219767
ENSMUSG00000019528	Gyg	27357	1151.99	0.134466	0.0424499	3.16764	0.00153682	0.0220835
ENSMUSG00000023393	Slc17a9	228993	29.437	0.45805	0.144599	3.16773	0.00153636	0.0220835
ENSMUSG00000058254	Tspan7	21912	33657.9	-0.166058	0.0524402	-3.16661	0.00154225	0.0221462
ENSMUSG00000036632	Alg5	66248	619.183	0.17162	0.05421	3.16584	0.00154637	0.0221901
ENSMUSG00000033960	Jcad	240185	4613.47	-0.259066	0.0818401	-3.16552	0.00154806	0.0221992
ENSMUSG00000008373	Prpf31	68988	1410.84	0.123077	0.0389032	3.16367	0.00155795	0.0222645
ENSMUSG00000032717	Mdfi	17240	15.076	0.707835	0.223729	3.16381	0.00155717	0.0222645
ENSMUSG00000045294	Insig1	231070	2652.42	0.254597	0.0804674	3.16398	0.00155629	0.0222645
ENSMUSG00000060380	C030014I23Rik	77381	639.326	0.204175	0.0645365	3.16372	0.00155768	0.0222645
ENSMUSG00000079215	Zfp664	269704	5072.14	-0.0963139	0.0304413	-3.16392	0.00155657	0.0222645
ENSMUSG00000042293	Gm5617	434402	84.05	0.389569	0.123196	3.1622	0.00156584	0.0223619
ENSMUSG00000033222	Ttf2	74044	90.2344	0.532958	0.168564	3.16175	0.00156824	0.022381
ENSMUSG00000033685	Ucp2	22228	1197.33	0.417851	0.132191	3.16097	0.00157246	0.0224258
ENSMUSG00000010277	2610507B11Rik	72503	13546.9	-0.11035	0.034917	-3.16036	0.00157572	0.0224439
ENSMUSG00000041841	Rpl37	67281	5313.32	0.291116	0.0921155	3.16034	0.00157587	0.0224439
ENSMUSG00000037253	Mex3c	240396	1487.36	-0.186109	0.0588971	-3.15991	0.0015782	0.0224617
ENSMUSG00000016409	Nkap	67050	634.538	0.15685	0.0496502	3.15911	0.0015825	0.0225075
ENSMUSG00000046380	Jrk	16469	454.04	0.194611	0.0616267	3.1579	0.0015891	0.0225706
ENSMUSG00000055053	Nfic	18029	3675.85	-0.203285	0.0643704	-3.15805	0.00158828	0.0225706
ENSMUSG00000015697	Setdb1	84505	2277.8	-0.114507	0.0362782	-3.15637	0.00159746	0.0226586
ENSMUSG00000019794	Katna1	23924	415.734	-0.156401	0.0495507	-3.15638	0.00159739	0.0226586
ENSMUSG00000020889	Nr1d1	217166	3770.08	-0.25262	0.0800709	-3.15496	0.00160522	0.0227531
ENSMUSG00000014592	Camta1	100072	12708.8	-0.147045	0.0466162	-3.15438	0.0016084	0.0227797
ENSMUSG00000029651	Mtus2	77521	2132.41	-0.164272	0.0520802	-3.15422	0.00160927	0.0227797
ENSMUSG00000028145	Them4	75778	660.104	0.238145	0.0755512	3.1521	0.00162103	0.0229306
ENSMUSG00000031167	Rbm3	19652	1571.36	-0.238439	0.0757196	-3.14898	0.00163844	0.0231611
ENSMUSG00000009406	Elk1	13712	2375.7	0.140149	0.0445102	3.14871	0.00163995	0.0231668
ENSMUSG00000022210	Dhrs4	28200	370.434	0.183755	0.0583633	3.14847	0.00164126	0.0231697
ENSMUSG00000044551	9930012K11Rik	268759	91.6639	0.301674	0.095825	3.14818	0.0016429	0.0231771
ENSMUSG00000063889	Crem	12916	624.562	-0.205218	0.0652367	-3.14574	0.00165669	0.0233558
ENSMUSG00000079608	Stard6	170461	31.2559	0.465747	0.148073	3.14539	0.00165867	0.023368
ENSMUSG00000046364	Rpl27a	26451	1406.37	0.223292	0.0710131	3.14438	0.00166439	0.0234328
ENSMUSG00000097182	A830009L08Rik	320297	108.287	-0.358092	0.113896	-3.14402	0.00166643	0.0234456
ENSMUSG00000038170	Pde4dip	83679	9696.56	-0.165967	0.052794	-3.14368	0.00166838	0.0234573
ENSMUSG00000021282	Eif5	217869	11088.8	0.141448	0.045005	3.14294	0.00167258	0.0235006
ENSMUSG00000003974	Grm3	108069	1906.66	-0.261017	0.083064	-3.14236	0.00167592	0.0235143
ENSMUSG00000022389	Tef	21685	16553.2	-0.139948	0.0445385	-3.14218	0.00167694	0.0235143
ENSMUSG00000046691	Chtf8	214987	2041.46	-0.133639	0.0425269	-3.14245	0.00167538	0.0235143
ENSMUSG00000066829	Zfp810	235050	738.457	0.219338	0.0698136	3.14176	0.00167934	0.0235321
ENSMUSG00000038970	Lmtk2	231876	9366.24	-0.257618	0.0820119	-3.14122	0.00168244	0.0235598
ENSMUSG00000025967	Eef1b2	55949	5336.09	0.194127	0.0618339	3.13949	0.00169243	0.0236838
ENSMUSG00000094628	Gm3252	100041283	46.2345	0.402727	0.128333	3.13815	0.0017002	0.0237766
ENSMUSG00000041205	Map6d1	208158	1953.73	-0.168401	0.053681	-3.13707	0.00170643	0.0238478
ENSMUSG00000025887	Casp12	12364	53.2367	0.473861	0.151072	3.13666	0.00170883	0.0238654
ENSMUSG00000073411	H2-D1	14964	1219.41	0.689051	0.219708	3.13622	0.00171143	0.0238857
ENSMUSG00000038276	Asic3	171209	45.7679	-0.49639	0.158353	-3.1347	0.00172028	0.0239771
ENSMUSG00000047675	Rps8	20116	4276.43	0.250215	0.0798172	3.13485	0.00171941	0.0239771
ENSMUSG00000020078	Vps26a	30930	2284.17	0.137095	0.0437404	3.1343	0.00172267	0.0239784
ENSMUSG00000036151	Tm6sf2	107770	131.887	-0.596353	0.190259	-3.13442	0.00172193	0.0239784
ENSMUSG00000041161	Otud3	73162	527.258	-0.209211	0.0667665	-3.13348	0.00172749	0.0240295
ENSMUSG00000018585	Atox1	11927	959.095	0.275274	0.0878765	3.13251	0.0017332	0.0240928
ENSMUSG00000074342	I830077J02Rik	433638	18.0944	0.818279	0.261275	3.13187	0.00173695	0.024129
ENSMUSG00000003363	Pld3	18807	19278.6	-0.231306	0.0738685	-3.13132	0.00174023	0.0241584
ENSMUSG00000063200	Nol7	70078	1339.2	0.175009	0.0558993	3.13079	0.00174336	0.0241858
ENSMUSG00000024526	Cidea	12683	130.745	0.28376	0.0906521	3.13021	0.0017468	0.0241941
ENSMUSG00000028459	Cd72	12517	35.7467	0.533689	0.170502	3.13011	0.00174743	0.0241941
ENSMUSG00000071001	Hrct1	100039781	19.5028	0.69243	0.221197	3.13038	0.00174581	0.0241941
ENSMUSG00000027408	Cpxm1	56264	298.542	0.253168	0.0808884	3.12984	0.00174902	0.0242
ENSMUSG00000042688	Mapk6	50772	2874.94	-0.169837	0.054271	-3.12943	0.00175144	0.0242014
ENSMUSG00000090451	Gm6133	620155	11.7298	0.696047	0.222416	3.12949	0.00175113	0.0242014
ENSMUSG00000046733	Gprc5a	232431	8.16605	-0.909936	0.290823	-3.12883	0.00175505	0.0242193
ENSMUSG00000093674	Rpl41	67945	9251.45	0.3413	0.109076	3.12901	0.00175395	0.0242193
ENSMUSG00000029096	Htra3	78558	219.876	0.390078	0.124697	3.1282	0.00175879	0.0242548
ENSMUSG00000004233	Wars2	70560	381.74	-0.238112	0.0761626	-3.12636	0.00176984	0.0243911
ENSMUSG00000045932	Ifit2	15958	496.553	0.228397	0.0730706	3.1257	0.0017738	0.0244295
ENSMUSG00000024533	Spire1	68166	6779.4	-0.140611	0.0450099	-3.12399	0.00178415	0.0245559
ENSMUSG00000045822	Zswim3	67538	389.724	-0.156355	0.0500845	-3.12182	0.00179734	0.0247048
ENSMUSG00000021071	Trim9	94090	10285.9	-0.16278	0.0521598	-3.1208	0.00180363	0.0247749
ENSMUSG00000054252	Fgfr3	14184	4571.27	-0.177371	0.0568392	-3.12058	0.00180496	0.0247769
ENSMUSG00000097784	A430105J06Rik	77189	20.1961	0.560922	0.179764	3.12032	0.00180653	0.0247822
ENSMUSG00000001419	Mef2d	17261	8582.95	-0.200034	0.0641274	-3.11931	0.00181274	0.0248022
ENSMUSG00000021890	Eaf1	74427	926.974	-0.122924	0.0394057	-3.11946	0.00181186	0.0248022
ENSMUSG00000025157	Zdhhc16	74168	468.075	-0.129891	0.0416375	-3.11956	0.00181119	0.0248022
ENSMUSG00000050370	Ch25h	12642	23.6917	1.32242	0.423891	3.11971	0.00181029	0.0248022
ENSMUSG00000001995	Sipa1l2	244668	2167.39	-0.253851	0.0813917	-3.11888	0.00181538	0.0248071
ENSMUSG00000026798	Coq4	227683	586.299	0.198799	0.0637408	3.11887	0.00181547	0.0248071
ENSMUSG00000030612	Mrpl46	67308	840.28	0.217386	0.0697239	3.11781	0.00182201	0.0248639
ENSMUSG00000019539	Rcn3	52377	174.456	0.397326	0.127453	3.11742	0.0018244	0.0248802
ENSMUSG00000022601	Zbtb11	271377	2322.31	-0.16462	0.0528108	-3.11717	0.00182597	0.0248854
ENSMUSG00000037772	Mrpl23	19935	88.3863	0.275912	0.0885201	3.11694	0.00182737	0.0248882
ENSMUSG00000019558	Slc6a8	102857	4596.07	-0.12237	0.0392627	-3.11669	0.00182893	0.0248933
ENSMUSG00000066894	Vsig10	231668	111.881	0.287057	0.0921185	3.11617	0.00183217	0.0249211
ENSMUSG00000032089	Il10ra	16154	266.572	0.246689	0.079171	3.1159	0.00183384	0.0249275
ENSMUSG00000037784	Dzip1l	72507	1253.79	-0.189637	0.0608698	-3.11545	0.00183663	0.0249493
ENSMUSG00000049504	Proser1	212127	1032.41	-0.125228	0.0402021	-3.11496	0.00183967	0.0249743
ENSMUSG00000082978	Rpsa-ps11	433712	17.9473	0.654191	0.210044	3.11454	0.00184231	0.0249777
ENSMUSG00000104516	Gm9884	108167844	42.3272	0.404056	0.12974	3.11434	0.00184357	0.0249785
ENSMUSG00000022827	Rabl3	67657	344.815	0.224273	0.0720249	3.11382	0.00184682	0.0249901
ENSMUSG00000035561	Aldh1b1	72535	347.933	0.194507	0.0624648	3.11386	0.00184657	0.0249901
ENSMUSG00000055302	Mrfap1	67568	9912.19	0.133229	0.042824	3.11108	0.00186403	0.0252066
ENSMUSG00000033545	Znrf1	170737	3392.31	-0.141173	0.0453819	-3.11079	0.0018659	0.0252156
ENSMUSG00000079111	Kdelr2	66913	931.379	0.119052	0.0382738	3.11053	0.00186754	0.0252215
ENSMUSG00000021366	Hivep1	110521	3682.94	-0.265445	0.0853661	-3.10949	0.0018741	0.0252786
ENSMUSG00000038264	Sema7a	20361	4976.83	-0.236796	0.0761531	-3.10948	0.00187419	0.0252786
ENSMUSG00000030302	Atp2b2	11941	27003	-0.267975	0.0861946	-3.10896	0.00187749	0.0253067
ENSMUSG00000026525	Opn3	13603	174.062	-0.276854	0.0890742	-3.10813	0.00188276	0.0253614
ENSMUSG00000025140	Pycr1	209027	134.621	0.213944	0.0688398	3.10785	0.00188454	0.025369
ENSMUSG00000054612	Mgmt	17314	27.6893	0.49565	0.159498	3.10755	0.00188643	0.0253781
ENSMUSG00000062944	9130023H24Rik	100043133	124.887	0.230253	0.0741225	3.10639	0.00189389	0.025462
ENSMUSG00000021666	Gfm2	320806	1658.23	0.107896	0.0347437	3.10547	0.00189977	0.0255083
ENSMUSG00000016534	Lamp2	16784	3451.97	0.208317	0.0671047	3.10436	0.00190693	0.0255714
ENSMUSG00000027777	Schip1	30953	337.58	-0.280968	0.0905039	-3.10448	0.00190612	0.0255714
ENSMUSG00000067575	Rpl35a-ps3	100043341	10.2932	0.760826	0.245212	3.10273	0.00191744	0.0256959
ENSMUSG00000034931	Dhx8	217207	1496.99	-0.146739	0.0473029	-3.1021	0.00192151	0.025734
ENSMUSG00000059883	Irak4	266632	91.5666	0.285654	0.0921178	3.10097	0.00192888	0.0257996
ENSMUSG00000036334	Igsf10	242050	224.524	0.329898	0.106407	3.10034	0.00193296	0.0258375
ENSMUSG00000022710	Usp7	252870	6696.56	-0.114631	0.0369954	-3.09853	0.00194486	0.0259469
ENSMUSG00000097777	Gm16794	100504734	80.0369	0.332051	0.107162	3.09858	0.00194454	0.0259469
ENSMUSG00000045095	Magi1	14924	4230.61	-0.133531	0.0431008	-3.09812	0.00194754	0.025966
ENSMUSG00000021190	Lgmn	19141	3722.07	0.197344	0.0637133	3.09737	0.00195245	0.0259934
ENSMUSG00000035914	Cd276	102657	414.062	0.233545	0.0754043	3.09724	0.00195334	0.0259934
ENSMUSG00000041229	Phf8	320595	1252.31	-0.179011	0.0577934	-3.09743	0.00195207	0.0259934
ENSMUSG00000018750	Zbtb4	75580	6849.33	-0.111974	0.0361757	-3.09527	0.00196632	0.026133
ENSMUSG00000056144	Trim34a	94094	46.0702	0.51032	0.164892	3.09488	0.00196891	0.0261506
ENSMUSG00000030109	Slc6a12	14411	96.1637	0.623687	0.20163	3.09323	0.00197994	0.0262804
ENSMUSG00000081487	Gm13689	100416042	20.2322	-0.604351	0.1954	-3.09289	0.00198219	0.0262936
ENSMUSG00000006589	Aprt	11821	734.732	0.244873	0.0791798	3.09263	0.00198394	0.0263001
ENSMUSG00000020372	Rack1	14694	6108.62	0.199381	0.0645089	3.09075	0.00199652	0.0264501
ENSMUSG00000052056	Zfp217	228913	181.067	0.235301	0.0761634	3.08943	0.00200543	0.0265344
ENSMUSG00000052137	Rbm12b2	77604	1162.09	-0.202095	0.0654455	-3.08799	0.00201515	0.0266462
ENSMUSG00000024096	Ralbp1	19765	3454.27	-0.135794	0.043981	-3.08755	0.00201814	0.0266689
ENSMUSG00000033538	Casp4	12363	19.9381	0.724184	0.234599	3.0869	0.00202254	0.0267101
ENSMUSG00000040524	Zfp609	214812	3151.24	-0.185035	0.0599626	-3.08585	0.00202973	0.0267881
ENSMUSG00000104443	4932442E05Rik	74415	60.5861	-0.386257	0.125198	-3.08517	0.00203437	0.0268323
ENSMUSG00000031093	Dock11	75974	522.754	0.206036	0.0668082	3.084	0.00204236	0.0269208
ENSMUSG00000058301	Upf1	19704	3008.29	-0.164025	0.0531944	-3.0835	0.00204584	0.0269326
ENSMUSG00000063739	Gm4963	243302	258.352	0.290188	0.0941074	3.08358	0.00204527	0.0269326
ENSMUSG00000020654	Adcy3	104111	1643.01	-0.208497	0.0676583	-3.08161	0.00205882	0.0270436
ENSMUSG00000032035	Ets1	23871	425.627	0.29488	0.0957045	3.08115	0.00206205	0.0270436
ENSMUSG00000032285	Dnaja4	58233	1056.71	-0.17085	0.0554497	-3.08117	0.00206192	0.0270436
ENSMUSG00000039105	Atp6v1g1	66290	2789.85	0.172684	0.0560414	3.08137	0.00206049	0.0270436
ENSMUSG00000060419	Rps16-ps2	100039355	4261.58	0.25152	0.0816211	3.08155	0.00205925	0.0270436
ENSMUSG00000062713	Sim2	20465	11.2881	0.66451	0.215622	3.08183	0.00205733	0.0270436
ENSMUSG00000020689	Itgb3	16416	204.466	0.219997	0.0714293	3.07993	0.00207048	0.0270692
ENSMUSG00000046434	Hnrnpa1	15382	9964.57	0.165001	0.0535694	3.08014	0.00206906	0.0270692
ENSMUSG00000061130	Ppm1b	19043	5080.66	-0.0944387	0.0306598	-3.08021	0.00206852	0.0270692
ENSMUSG00000073421	H2-Ab1	14961	86.7906	0.892431	0.289744	3.08007	0.00206951	0.0270692
ENSMUSG00000103409	Lsmem2	434436	20.6928	-0.715518	0.232303	-3.08011	0.00206926	0.0270692
ENSMUSG00000021990	Spata13	219140	747.181	0.246765	0.0801512	3.07874	0.00207878	0.0271608
ENSMUSG00000037573	Tob1	22057	1362.25	-0.224652	0.0729884	-3.07792	0.00208454	0.0272019
ENSMUSG00000051323	Pcdh19	279653	2545.37	0.156973	0.0509973	3.07807	0.00208343	0.0272019
ENSMUSG00000039450	Dcxr	67880	188.079	0.298625	0.0970332	3.07756	0.00208706	0.0272178
ENSMUSG00000059776	Rpl13-ps6	100040416	4660.49	0.265489	0.0862975	3.07644	0.00209487	0.0273026
ENSMUSG00000019916	P4ha1	18451	1831.26	-0.24909	0.0809783	-3.07601	0.00209791	0.0273252
ENSMUSG00000001482	Def8	23854	1962.35	-0.117655	0.0382571	-3.07537	0.00210244	0.0273415
ENSMUSG00000022526	Zfp251	71591	1873.67	-0.129334	0.0420532	-3.07548	0.00210164	0.0273415
ENSMUSG00000031652	N4bp1	80750	2891.6	-0.161806	0.052615	-3.07527	0.00210309	0.0273415
ENSMUSG00000038807	Rap1gap2	380711	10732.7	-0.21001	0.0682945	-3.07506	0.00210457	0.0273437
ENSMUSG00000037463	Fbxo27	233040	500.581	-0.189625	0.0616858	-3.07405	0.00211171	0.0274023
ENSMUSG00000046916	Myct1	68632	21.7197	0.685902	0.223126	3.07406	0.00211165	0.0274023
ENSMUSG00000019942	Cdk1	12534	11.865	0.762394	0.248159	3.0722	0.00212487	0.0275542
ENSMUSG00000032548	Slco2a1	24059	138.349	-0.292211	0.0951198	-3.07203	0.00212605	0.0275542
ENSMUSG00000043716	Rpl7	19989	7579.22	0.193301	0.0629931	3.0686	0.00215061	0.0278552
ENSMUSG00000035121	Neil2	382913	121.952	0.244905	0.0798282	3.06791	0.00215564	0.027903
ENSMUSG00000002329	Mdp1	67881	1478.26	0.170429	0.0555619	3.06738	0.00215945	0.0279256
ENSMUSG00000102742	Pcdhga11	93723	246.048	-0.323473	0.105459	-3.0673	0.00216006	0.0279256
ENSMUSG00000081695	Rpsa-ps5	382504	110.312	0.428447	0.139751	3.06578	0.00217101	0.0280498
ENSMUSG00000032487	Ptgs2	19225	564.895	-0.387548	0.126435	-3.06519	0.00217529	0.0280704
ENSMUSG00000053358	Gm9905	791343	42.7406	0.333059	0.108655	3.06529	0.00217461	0.0280704
ENSMUSG00000044548	Dact1	59036	166.988	-0.26572	0.0867682	-3.06241	0.00219563	0.0283154
ENSMUSG00000031146	Plp2	18824	99.6468	0.287207	0.0938022	3.06183	0.00219985	0.0283523
ENSMUSG00000021313	Ryr2	20191	11813.1	-0.221448	0.0723326	-3.06152	0.00220217	0.0283647
ENSMUSG00000032267	Usp28	235323	1375.52	-0.146213	0.0477662	-3.06101	0.00220594	0.0283957
ENSMUSG00000037188	Grhl3	230824	51.353	-0.341158	0.111463	-3.06073	0.00220801	0.0284048
ENSMUSG00000051344	Plekhm3	241075	2343.01	-0.189877	0.0620428	-3.06042	0.00221026	0.0284114
ENSMUSG00000060019	Gm10073	100042734	1147.13	0.37061	0.12111	3.0601	0.00221261	0.0284114
ENSMUSG00000060063	Alox5ap	11690	123.203	0.317762	0.10384	3.06011	0.00221258	0.0284114
ENSMUSG00000029468	P2rx7	18439	432.133	0.213937	0.0699283	3.05938	0.00221798	0.0284553
ENSMUSG00000031641	Cbr4	234309	384.523	0.220933	0.0722218	3.05909	0.00222011	0.0284553
ENSMUSG00000062545	Tlr12	384059	33.6803	0.482807	0.157826	3.05911	0.00221999	0.0284553
ENSMUSG00000070564	Ntn5	243967	157.748	-0.408292	0.133478	-3.05887	0.00222171	0.0284584
ENSMUSG00000024727	Trpm6	225997	56.4354	0.405599	0.132642	3.05785	0.00222931	0.0285382
ENSMUSG00000043795	Prr33	677289	29.9414	0.475807	0.155615	3.05759	0.00223122	0.0285451
ENSMUSG00000013483	Card14	170720	24.6721	0.598952	0.19595	3.05666	0.00223815	0.0286163
ENSMUSG00000074793	Hspa12b	72630	325.552	0.307503	0.100708	3.05342	0.00226246	0.0289094
ENSMUSG00000066315	Gm12918	100039656	3558.81	0.271461	0.0889104	3.05319	0.0022642	0.0289139
ENSMUSG00000000441	Raf1	110157	3575.98	-0.0742361	0.0243213	-3.05231	0.00227088	0.0289461
ENSMUSG00000027419	Pcsk2	18549	11855.6	-0.179003	0.0586436	-3.0524	0.00227022	0.0289461
ENSMUSG00000058173	Smco4	170748	70.4045	0.320808	0.105094	3.05259	0.00226879	0.0289461
ENSMUSG00000038301	Snx10	71982	5823.49	0.187039	0.0612819	3.0521	0.00227243	0.0289482
ENSMUSG00000051998	Lax1	240754	21.0559	-0.530244	0.173769	-3.05143	0.00227756	0.0289959
ENSMUSG00000003746	Man1a	17155	1529.62	0.221615	0.07266	3.05002	0.00228824	0.0291141
ENSMUSG00000025154	Arhgap19	71085	227.208	0.188606	0.0618476	3.04953	0.00229197	0.0291437
ENSMUSG00000026678	Rgs5	19737	2662.69	0.264684	0.086812	3.04894	0.00229653	0.0291839
ENSMUSG00000074384	AI429214	621080	141.264	0.409818	0.134519	3.04655	0.00231482	0.0293984
ENSMUSG00000037139	Myom3	242702	86.8771	-0.356866	0.117162	-3.04591	0.00231975	0.0294433
ENSMUSG00000022696	Sidt1	320007	2516.31	-0.20809	0.0683348	-3.04516	0.00232559	0.0294943
ENSMUSG00000062753	AI413582	106672	1026.18	0.241607	0.079345	3.04503	0.0023266	0.0294943
ENSMUSG00000087466	A330041J22Rik	319556	61.3644	0.358564	0.117764	3.04476	0.00232867	0.0295026
ENSMUSG00000029790	Cep41	83922	289.389	0.199133	0.06545	3.04251	0.00234612	0.0296696
ENSMUSG00000035735	Dagla	269060	4626.28	-0.203315	0.0668227	-3.04261	0.0023454	0.0296696
ENSMUSG00000050445	Cyp8b1	13124	10.7156	-0.739292	0.242973	-3.04269	0.00234476	0.0296696
ENSMUSG00000074800	Gm4149	100653392	1000.85	0.314591	0.103433	3.04151	0.00235398	0.029751
ENSMUSG00000031367	Ap1s2	108012	2375.85	0.194319	0.0638973	3.04111	0.00235708	0.0297678
ENSMUSG00000041417	Pik3r1	18708	6446.92	-0.155973	0.0512904	-3.04097	0.00235815	0.0297678
ENSMUSG00000100215	Gm8292	666793	1578.92	0.352104	0.115827	3.03993	0.00236634	0.0298531
ENSMUSG00000025427	Rnf165	225743	2848.72	-0.222829	0.0733061	-3.0397	0.00236814	0.0298577
ENSMUSG00000025017	Pik3ap1	83490	100.972	0.457915	0.150656	3.03947	0.00236991	0.029862
ENSMUSG00000032215	Rsl24d1	225215	1048.3	0.157105	0.051693	3.03918	0.0023722	0.0298728
ENSMUSG00000033439	Trmt13	229780	233.92	0.284588	0.0936546	3.03869	0.00237606	0.0299035
ENSMUSG00000021496	Pcbd2	72562	124.405	0.279833	0.0921415	3.037	0.00238949	0.0300363
ENSMUSG00000005951	Shpk	74637	196.464	0.201446	0.0663648	3.03543	0.00240193	0.0301507
ENSMUSG00000024660	Incenp	16319	739.776	-0.152532	0.0502516	-3.03536	0.00240252	0.0301507
ENSMUSG00000034168	Irf2bpl	238330	3117.09	-0.204496	0.0673725	-3.0353	0.00240293	0.0301507
ENSMUSG00000021701	Plk2	20620	6675.34	-0.165809	0.0546366	-3.03476	0.0024073	0.0301757
ENSMUSG00000046719	Nxph3	104079	1078.56	0.267856	0.0882645	3.03469	0.00240781	0.0301757
ENSMUSG00000017713	Tha1	71776	218.942	0.290164	0.095657	3.03338	0.00241832	0.0302614
ENSMUSG00000019797	1700021F05Rik	67851	679.495	0.192049	0.063316	3.03319	0.00241984	0.0302614
ENSMUSG00000034460	Six4	20474	102.009	-0.351821	0.115993	-3.03311	0.00242045	0.0302614
ENSMUSG00000102729	Gm32444	102634995	365.267	0.303048	0.0999108	3.03319	0.00241987	0.0302614
ENSMUSG00000005043	Sgsh	27029	289.099	0.274994	0.0906732	3.0328	0.00242292	0.0302742
ENSMUSG00000035208	Slfn8	276950	33.2135	0.849341	0.280127	3.03199	0.00242947	0.0303379
ENSMUSG00000025946	Pth2r	213527	65.0615	-0.279577	0.0922354	-3.03113	0.00243639	0.0304061
ENSMUSG00000031903	Pla2g15	192654	1189.88	0.160553	0.0529815	3.03036	0.00244265	0.030466
ENSMUSG00000025049	Taf5	226182	284.274	-0.182429	0.0602163	-3.02956	0.0024491	0.0305283
ENSMUSG00000044017	Adgrd1	243277	192.681	-0.284931	0.0940714	-3.02888	0.00245461	0.0305786
ENSMUSG00000027712	Anxa5	11747	2031.12	0.179327	0.0592315	3.02755	0.00246542	0.0306776
ENSMUSG00000047867	Gimap6	231931	114.876	-0.407538	0.13461	-3.02755	0.00246549	0.0306776
ENSMUSG00000024561	Mbd1	17190	1064.47	-0.0998239	0.0329838	-3.02645	0.00247443	0.0307705
ENSMUSG00000053510	Nrd1	230598	6440.31	-0.0855678	0.0282878	-3.0249	0.00248717	0.0308992
ENSMUSG00000064417	DQ267102	100861572	20.5989	-0.489011	0.161666	-3.02483	0.00248774	0.0308992
ENSMUSG00000055409	Nell1	338352	2032.09	-0.222921	0.0737303	-3.02346	0.00249901	0.0310207
ENSMUSG00000047539	Fbxo28	67948	2278.66	-0.111214	0.0367914	-3.02282	0.00250428	0.0310492
ENSMUSG00000054675	Tmem119	231633	842.363	0.254494	0.0841876	3.02294	0.00250332	0.0310492
ENSMUSG00000082064	Rpl5-ps2	668936	734.287	0.293381	0.0971233	3.02071	0.00252184	0.0312299
ENSMUSG00000038456	Dennd2a	209773	990.954	-0.149568	0.0495234	-3.02014	0.00252655	0.0312696
ENSMUSG00000016252	Atp5e	67126	3405.88	0.295054	0.0977115	3.01964	0.00253075	0.031303
ENSMUSG00000047878	A4galt	239559	73.3317	0.448971	0.148713	3.01904	0.00253578	0.0313467
ENSMUSG00000016831	Tox4	268741	2872.46	-0.141453	0.046862	-3.01851	0.00254021	0.0313829
ENSMUSG00000040325	Dcaf1	321006	1622.92	-0.154102	0.051057	-3.01823	0.00254259	0.0313937
ENSMUSG00000002602	Axl	26362	2010.78	0.154409	0.0511862	3.01661	0.00255616	0.0315018
ENSMUSG00000021820	Camk2g	12325	9895.27	-0.185009	0.0613224	-3.01699	0.00255299	0.0315018
ENSMUSG00000039117	Taf4	228980	1020.67	-0.139731	0.0463201	-3.01663	0.002556	0.0315018
ENSMUSG00000024661	Fth1	14319	54551.2	0.267308	0.0886506	3.0153	0.00256725	0.0316047
ENSMUSG00000020525	Ppm1d	53892	604.503	-0.153952	0.0510637	-3.01491	0.0025706	0.0316273
ENSMUSG00000032743	D430042O09Rik	233865	1217.3	-0.109204	0.0362591	-3.01177	0.00259726	0.0319365
ENSMUSG00000043257	Pigv	230801	407.635	0.138078	0.0458685	3.0103	0.00260992	0.0320733
ENSMUSG00000036591	Arhgap21	71435	8312.33	-0.144371	0.0479678	-3.00975	0.00261465	0.0321125
ENSMUSG00000033004	Mycbp2	105689	18467.4	-0.163597	0.0543662	-3.00917	0.00261962	0.0321547
ENSMUSG00000020164	Kcnmb4os1	67342	11.0065	-0.710785	0.236249	-3.00863	0.00262429	0.032193
ENSMUSG00000039981	Zc3h12d	237256	10.8391	0.948336	0.31528	3.00792	0.00263042	0.0322493
ENSMUSG00000021182	Ccdc88c	68339	1529.69	-0.171567	0.0570591	-3.00682	0.00263995	0.0323471
ENSMUSG00000029577	Ube3b	117146	5123.46	-0.186197	0.061934	-3.00637	0.00264385	0.0323702
ENSMUSG00000049940	Pgrmc2	70804	3368.1	0.103314	0.0343666	3.00625	0.00264493	0.0323702
ENSMUSG00000031974	Abcb10	56199	1462.54	0.114401	0.0380717	3.00489	0.00265677	0.0324579
ENSMUSG00000033099	Nol12	97961	773.204	0.229327	0.0763145	3.00502	0.0026556	0.0324579
ENSMUSG00000049515	Espnl	227357	20.9092	-0.628357	0.209104	-3.005	0.00265581	0.0324579
ENSMUSG00000036743	Psma8	73677	13.6085	0.656223	0.218449	3.00401	0.0026645	0.0325143
ENSMUSG00000039458	Mtmr12	268783	1929.02	-0.155677	0.0518208	-3.00414	0.00266329	0.0325143
ENSMUSG00000035569	Ankrd11	77087	10340.3	-0.156586	0.0521305	-3.00372	0.00266697	0.0325255
ENSMUSG00000025257	Ribc1	66611	31.0983	0.384108	0.127914	3.00286	0.00267459	0.0325994
ENSMUSG00000037563	Rps16	20055	977.036	0.424117	0.141293	3.00169	0.00268488	0.0327058
ENSMUSG00000028066	Pmf1	67037	107.768	0.316044	0.105322	3.00075	0.00269319	0.0327688
ENSMUSG00000050910	Cdr2l	237988	1252.9	-0.185258	0.0617368	-3.00077	0.00269294	0.0327688
ENSMUSG00000026888	Grb14	50915	875.578	0.148011	0.0493319	3.0003	0.0026971	0.0327971
ENSMUSG00000030232	Aebp2	11569	3304.03	-0.107063	0.0356878	-2.99998	0.00269998	0.0328131
ENSMUSG00000027215	Cd82	12521	813.918	0.256319	0.0855356	2.99664	0.00272972	0.0331553
ENSMUSG00000035355	Kcnh4	380728	925.463	-0.293116	0.0978224	-2.99641	0.00273176	0.0331607
ENSMUSG00000078651	Aoc2	237940	217.752	-0.279774	0.0933815	-2.99604	0.00273513	0.0331823
ENSMUSG00000036112	Metap2	56307	3505.1	0.0952333	0.0317932	2.9954	0.00274085	0.0332324
ENSMUSG00000018567	Gabarap	56486	4656.49	0.211225	0.0705567	2.99369	0.00275624	0.033395
ENSMUSG00000031168	Ebp	13595	512.156	0.160615	0.0536536	2.99356	0.00275746	0.033395
ENSMUSG00000017677	Wsb1	78889	5245.05	0.167657	0.0560233	2.99264	0.00276579	0.0334571
ENSMUSG00000046603	Tcaim	382117	921.562	0.131045	0.0437887	2.99266	0.00276553	0.0334571
ENSMUSG00000034902	Pip5k1c	18717	15852.2	-0.194328	0.064955	-2.99173	0.00277401	0.0335177
ENSMUSG00000099825	1810012K16Rik	69108	10.4722	0.802291	0.268164	2.99179	0.00277344	0.0335177
ENSMUSG00000039005	Tlr4	21898	76.0245	0.418079	0.139756	2.9915	0.00277609	0.0335234
ENSMUSG00000018906	P4ha2	18452	732.154	-0.226475	0.0757172	-2.99107	0.00278003	0.0335516
ENSMUSG00000018899	Irf1	16362	234.367	0.208696	0.0697884	2.99042	0.00278595	0.033593
ENSMUSG00000028351	Brinp1	56710	7329.7	-0.176875	0.0591558	-2.98999	0.00278989	0.033593
ENSMUSG00000039519	Cyp7b1	13123	477.958	0.175408	0.0586637	2.99006	0.00278925	0.033593
ENSMUSG00000071281	Zfp65	235907	572.128	0.225209	0.0753148	2.99024	0.00278761	0.033593
ENSMUSG00000032356	Rasgrf1	19417	15334.1	-0.187689	0.06278	-2.98962	0.0027932	0.0335989
ENSMUSG00000100862	Gm10925	100503946	327529	0.365895	0.12239	2.98958	0.00279361	0.0335989
ENSMUSG00000051590	Map3k19	22625	188.165	-0.324365	0.108537	-2.98852	0.0028033	0.0336961
ENSMUSG00000022280	Rnf19a	30945	1515	-0.126747	0.0424177	-2.98807	0.00280748	0.0337076
ENSMUSG00000047735	Samd9l	209086	230.097	0.412256	0.137962	2.9882	0.00280628	0.0337076
ENSMUSG00000085967	Gm12530	329851	7.41577	0.841097	0.281551	2.98737	0.00281392	0.033746
ENSMUSG00000066149	Cdc26	66440	838.158	0.137765	0.0461224	2.98695	0.00281775	0.0337725
ENSMUSG00000097561	4632411P08Rik	78263	33.2641	0.358983	0.120202	2.98651	0.00282186	0.0338024
ENSMUSG00000038384	Setd1b	208043	2118.98	-0.248217	0.0831268	-2.986	0.00282649	0.0338384
ENSMUSG00000005936	Kctd20	66989	3227.47	-0.0904994	0.0303188	-2.98492	0.00283651	0.0339389
ENSMUSG00000031825	Crispld2	78892	136.125	0.380226	0.127451	2.98332	0.0028514	0.0340976
ENSMUSG00000086006	Gm13293	100503147	97.8075	0.402478	0.134921	2.98306	0.00285378	0.0341065
ENSMUSG00000018470	Kcnab3	16499	2000.32	-0.233042	0.0781313	-2.9827	0.00285717	0.034108
ENSMUSG00000020657	Dnajc27	217378	6542.63	-0.140537	0.0471167	-2.98274	0.00285677	0.034108
ENSMUSG00000020366	Mapk9	26420	10150.2	-0.145389	0.0487866	-2.98011	0.00288146	0.0343783
ENSMUSG00000025935	Tram1	72265	1402.43	0.119311	0.0400585	2.97842	0.00289736	0.0345286
ENSMUSG00000033196	Myh2	17882	68.6045	-0.462869	0.1554	-2.97857	0.00289596	0.0345286
ENSMUSG00000073535	Gm5532	433367	10.9829	0.701374	0.235503	2.97819	0.00289954	0.0345348
ENSMUSG00000070873	Lilra5	232801	11.0321	1.01144	0.339638	2.978	0.00290136	0.0345368
ENSMUSG00000038843	Gcnt1	14537	265.974	0.505769	0.169868	2.97743	0.00290672	0.0345808
ENSMUSG00000062101	Zfp119b	240120	112.37	0.328868	0.110487	2.97653	0.00291533	0.0346635
ENSMUSG00000026668	Ucma	68527	26.8465	0.656277	0.220554	2.97559	0.00292427	0.0347501
ENSMUSG00000038611	Phrf1	101471	2327.66	-0.138599	0.0465858	-2.97513	0.00292863	0.0347795
ENSMUSG00000047473	Zfp30	22693	609.839	-0.131416	0.0441763	-2.97481	0.00293175	0.0347795
ENSMUSG00000049327	Kmt5a	67956	1600.25	-0.155881	0.0523984	-2.97492	0.00293067	0.0347795
ENSMUSG00000026963	Tmem210	78217	68.5277	-0.437615	0.147127	-2.9744	0.00293565	0.034806
ENSMUSG00000083579	Gm15538	664851	25.9364	-0.52199	0.175513	-2.97408	0.00293864	0.0348217
ENSMUSG00000046714	Foxc2	14234	62.7651	0.786821	0.264625	2.97335	0.00294573	0.0348859
ENSMUSG00000091275	Gm3248	100041279	64.6803	0.34709	0.116744	2.97308	0.00294832	0.0348968
ENSMUSG00000052921	Arhgef15	442801	1008.79	0.164083	0.0551933	2.97287	0.00295025	0.0348999
ENSMUSG00000097131	D230017M19Rik	320933	295.591	0.202132	0.0680216	2.97158	0.00296267	0.035027
ENSMUSG00000022849	Hspbap1	66667	243.427	-0.186636	0.0628106	-2.9714	0.00296443	0.035028
ENSMUSG00000014773	Dll1	13388	211.504	-0.214961	0.0723493	-2.97116	0.00296676	0.0350356
ENSMUSG00000003283	Hck	15162	93.6775	0.342269	0.115312	2.96821	0.00299544	0.0353543
ENSMUSG00000034317	Trim59	66949	743.987	0.39022	0.131569	2.9659	0.00301794	0.0355998
ENSMUSG00000058064	Gm10036	100040551	1630.28	0.301501	0.101675	2.96534	0.00302347	0.0356448
ENSMUSG00000027401	Tgm3	21818	128.702	-0.431759	0.14563	-2.96476	0.00302918	0.035692
ENSMUSG00000038481	Cdk19	78334	3522.79	-0.170204	0.0574248	-2.96394	0.00303726	0.035767
ENSMUSG00000042419	Nfkbil1	18038	234.457	0.25326	0.0854668	2.96326	0.00304402	0.0358264
ENSMUSG00000022400	Rbx1	56438	3667.99	0.11919	0.0402253	2.96306	0.00304598	0.0358293
ENSMUSG00000004451	Ralb	64143	810.264	0.134227	0.04531	2.96242	0.00305234	0.0358637
ENSMUSG00000022639	Dubr	68190	271.828	0.472872	0.159623	2.96242	0.00305227	0.0358637
ENSMUSG00000005447	Pafah1b3	18476	401.256	0.255859	0.0863998	2.96134	0.003063	0.0359614
ENSMUSG00000028920	Fbxo42	213499	1995.65	-0.144358	0.0487492	-2.96123	0.0030641	0.0359614
ENSMUSG00000079388	2610042L04Rik	554327	30.8331	0.429054	0.1449	2.96102	0.00306619	0.0359657
ENSMUSG00000029007	Agtrap	11610	506.581	0.217543	0.0734892	2.96021	0.00307434	0.036041
ENSMUSG00000027079	Clp1	98985	259.438	-0.157723	0.0532851	-2.95999	0.00307648	0.036046
ENSMUSG00000090743	Gm17213	100417908	13.9703	-0.795454	0.268947	-2.95766	0.00309988	0.0362997
ENSMUSG00000022297	Fzd6	14368	301.769	0.3348	0.113209	2.95736	0.00310281	0.0363137
ENSMUSG00000019810	Fuca2	66848	1862.3	0.116678	0.0394573	2.95708	0.00310572	0.0363273
ENSMUSG00000042502	Cd2bp2	70233	3180.77	0.0792018	0.0267904	2.95636	0.00311298	0.0363907
ENSMUSG00000056418	BC043934	270185	28.4035	0.431272	0.145888	2.95619	0.00311462	0.0363907
ENSMUSG00000051113	Fam71e1	75538	113.884	0.347339	0.117526	2.95542	0.00312248	0.0364409
ENSMUSG00000068747	Sort1	20661	19856.6	-0.180275	0.0610016	-2.95525	0.00312416	0.0364409
ENSMUSG00000099104	Gm17087	100416032	33.0635	-0.921205	0.311696	-2.95546	0.00312206	0.0364409
ENSMUSG00000100691	2010320M18Rik	72093	184.115	0.286491	0.0969536	2.95493	0.00312742	0.0364586
ENSMUSG00000028610	Dmrtb1	56296	35.3224	0.577873	0.195612	2.95418	0.00313502	0.0364838
ENSMUSG00000030281	Il17rc	171095	152.956	0.247668	0.0838267	2.95453	0.00313148	0.0364838
ENSMUSG00000041827	Oasl1	231655	8.17928	0.941823	0.318796	2.95431	0.00313365	0.0364838
ENSMUSG00000069895	Atxn1l	52335	2168.34	-0.143084	0.0484368	-2.95403	0.00313657	0.0364838
ENSMUSG00000003423	Pih1d1	68845	819.936	0.242267	0.0820204	2.95374	0.00313945	0.036497
ENSMUSG00000001918	Slc1a5	20514	154.777	0.357984	0.121226	2.95303	0.00314671	0.0365611
ENSMUSG00000023224	Serping1	12258	310.049	0.47215	0.159957	2.95173	0.00315999	0.0366745
ENSMUSG00000049550	Clip1	56430	5551.28	-0.144092	0.0488148	-2.95182	0.00315909	0.0366745
ENSMUSG00000022604	Cep97	74201	1389.16	-0.173627	0.0588255	-2.95156	0.00316177	0.0366747
ENSMUSG00000030792	Dkkl1	50722	435.155	-0.34829	0.118014	-2.95127	0.0031647	0.0366884
ENSMUSG00000049775	Tmsb4x	19241	23626.7	0.256214	0.086838	2.95048	0.00317276	0.0367614
ENSMUSG00000024369	Nelfe	27632	835.223	0.179928	0.0609899	2.95013	0.00317637	0.0367828
ENSMUSG00000006219	Fblim1	74202	61.6435	0.446158	0.15128	2.94921	0.00318586	0.0368519
ENSMUSG00000025231	Sufu	24069	767.705	-0.131448	0.044569	-2.94932	0.00318478	0.0368519
ENSMUSG00000000182	Fgf23	64654	14.9901	0.620216	0.210358	2.94838	0.00319445	0.0369307
ENSMUSG00000027525	Phactr3	74189	4908.99	-0.132383	0.0449061	-2.94799	0.00319844	0.0369564
ENSMUSG00000022112	Gpc5	103978	1136.21	-0.138743	0.0470708	-2.94753	0.0032032	0.0369909
ENSMUSG00000065968	Ifitm7	74482	34.9681	0.425734	0.144448	2.94732	0.0032054	0.0369958
ENSMUSG00000024617	Camk2a	12322	102797	-0.156713	0.0531769	-2.94702	0.00320856	0.0370119
ENSMUSG00000002341	Ncan	13004	8010.09	-0.177734	0.060317	-2.94667	0.00321211	0.0370324
ENSMUSG00000002731	Prkra	23992	632.872	0.156871	0.0532531	2.94575	0.0032217	0.0370611
ENSMUSG00000017404	Rpl19	19921	5252.9	0.238852	0.0810765	2.94601	0.00321903	0.0370611
ENSMUSG00000034247	Plekhm1	353047	1401.73	-0.171065	0.0580702	-2.94583	0.00322088	0.0370611
ENSMUSG00000046408	1700067K01Rik	73453	45.0843	0.362583	0.123084	2.94582	0.003221	0.0370611
ENSMUSG00000056130	Ticam2	225471	17.6167	0.526962	0.178931	2.94506	0.00322896	0.0371241
ENSMUSG00000030218	Mgp	17313	560.944	0.60921	0.206886	2.94466	0.00323305	0.0371507
ENSMUSG00000011960	Ccnt1	12455	2003.66	-0.140086	0.0475793	-2.94427	0.00323718	0.0371777
ENSMUSG00000100680	1810044D09Rik	69798	19.9287	0.527553	0.179191	2.94409	0.0032391	0.0371793
ENSMUSG00000031488	Rab11fip1	75767	110.207	0.280962	0.0954598	2.94325	0.00324785	0.0372593
ENSMUSG00000020553	Pctp	18559	72.8314	0.298288	0.10138	2.94227	0.00325816	0.0372956
ENSMUSG00000026961	Lrrc26	227618	114.915	-0.431592	0.14668	-2.94241	0.00325667	0.0372956
ENSMUSG00000035472	Slc25a21	217593	19.9398	0.574782	0.195333	2.94257	0.00325496	0.0372956
ENSMUSG00000061787	Rps17	20068	5105.06	0.239621	0.0814342	2.94251	0.00325567	0.0372956
ENSMUSG00000005131	4930550C14Rik	75311	9.49067	0.695732	0.236506	2.94171	0.0032641	0.0373431
ENSMUSG00000025576	Rbfox3	52897	8523.27	-0.176737	0.0600893	-2.94124	0.00326899	0.0373785
ENSMUSG00000025991	Cps1	227231	19.9041	-0.653537	0.22245	-2.93791	0.00330436	0.0377416
ENSMUSG00000022100	Xpo7	65246	4333	-0.119665	0.0407439	-2.93699	0.00331415	0.0378327
ENSMUSG00000025477	Inpp5a	212111	1761.13	-0.128046	0.0436029	-2.93664	0.00331787	0.0378338
ENSMUSG00000030562	Nox4	50490	20.1869	0.527617	0.179666	2.93666	0.00331772	0.0378338
ENSMUSG00000083306	Gm13868	108168780	8.61553	0.996349	0.339302	2.93646	0.00331979	0.0378351
ENSMUSG00000001794	Capns1	12336	5511.77	0.188342	0.0641596	2.93553	0.00332979	0.0379284
ENSMUSG00000026365	Cfh	12628	996.471	0.444077	0.151401	2.93312	0.00335572	0.0382029
ENSMUSG00000026289	Atg16l1	77040	3024.74	-0.0865618	0.0295291	-2.93141	0.00337428	0.0383932
ENSMUSG00000023026	Dip2b	239667	4349.51	-0.14475	0.049385	-2.93105	0.00337815	0.0383954
ENSMUSG00000053950	Adnp2	240442	1282.1	-0.109992	0.0375252	-2.93115	0.00337715	0.0383954
ENSMUSG00000029385	Ccng2	12452	1731.47	-0.151803	0.0518514	-2.92765	0.00341535	0.0387761
ENSMUSG00000032067	Pts	19286	781.834	0.189213	0.0646371	2.92731	0.00341912	0.0387977
ENSMUSG00000033377	Palmd	114301	523.931	-0.216511	0.0739699	-2.92701	0.00342238	0.0388136
ENSMUSG00000033540	Idua	15932	762.124	0.24965	0.0853025	2.92664	0.00342643	0.0388174
ENSMUSG00000037503	Fam168b	214469	14130.7	-0.137323	0.0469205	-2.92673	0.00342552	0.0388174
ENSMUSG00000002043	Trappc6a	67091	292.568	0.417051	0.142602	2.92458	0.00344918	0.0390539
ENSMUSG00000018669	Cdk5rap3	80280	1102.49	0.200111	0.0684451	2.92367	0.0034593	0.0390626
ENSMUSG00000020454	Eif4enif1	74203	2285.94	-0.0999398	0.0341824	-2.92372	0.00345871	0.0390626
ENSMUSG00000057605	Gm6807	627889	691.042	0.258633	0.0884505	2.92405	0.00345514	0.0390626
ENSMUSG00000084106	Gm6136	620213	2273.92	0.16481	0.0563605	2.92421	0.00345333	0.0390626
ENSMUSG00000085436	Zfp335os	629777	110.844	0.234478	0.0801937	2.9239	0.00345677	0.0390626
ENSMUSG00000029070	Mxra8	74761	288.241	0.389542	0.133257	2.92323	0.00346419	0.0390755
ENSMUSG00000099284	Mir7026	102466216	8.043	-0.687106	0.235068	-2.92301	0.00346668	0.0390826
ENSMUSG00000030894	Tpp1	12751	2884.01	0.125948	0.0431	2.92222	0.00347543	0.0390967
ENSMUSG00000038115	Ano2	243634	272.119	-0.299627	0.102518	-2.92267	0.0034704	0.0390967
ENSMUSG00000059027	9630013D21Rik	319743	7.75666	0.788997	0.269975	2.92248	0.0034726	0.0390967
ENSMUSG00000085337	Gm15964	100503130	23.0218	0.432242	0.147913	2.92227	0.00347487	0.0390967
ENSMUSG00000025665	Rps6ka6	67071	325.807	0.229723	0.0786356	2.92136	0.00348506	0.0391557
ENSMUSG00000027194	Ttc17	74569	1789.9	-0.0978512	0.0334947	-2.92139	0.00348471	0.0391557
ENSMUSG00000054555	Adam12	11489	203.467	0.282717	0.0967795	2.92125	0.0034863	0.0391557
ENSMUSG00000042671	Rgs8	67792	5441.49	-0.147725	0.0505811	-2.92056	0.00349406	0.039189
ENSMUSG00000061242	Gm9104	668319	133.511	0.369587	0.12655	2.92048	0.00349489	0.039189
ENSMUSG00000041915	Ammecr1l	225339	1123.9	-0.0907098	0.0310745	-2.9191	0.0035104	0.0393417
ENSMUSG00000037742	Eef1a1	13627	54256.6	0.132123	0.0452674	2.91873	0.00351456	0.0393672
ENSMUSG00000028957	Per3	18628	3165.15	-0.223121	0.0764551	-2.91833	0.00351915	0.0393794
ENSMUSG00000091318	Gm5415	408191	49.3683	0.664069	0.227553	2.9183	0.00351942	0.0393794
ENSMUSG00000021342	Prl	19109	150.193	3.89328	1.33492	2.9165	0.00353981	0.03953
ENSMUSG00000037089	Slc35b2	73836	921.408	0.190639	0.0653668	2.91645	0.00354037	0.03953
ENSMUSG00000041119	Pde9a	18585	690.511	0.157987	0.0541735	2.91631	0.00354196	0.03953
ENSMUSG00000058818	Pirb	18733	54.084	0.48713	0.167026	2.91649	0.00353989	0.03953
ENSMUSG00000092060	Bend4	666938	639.155	-0.206524	0.0708176	-2.91628	0.00354235	0.03953
ENSMUSG00000028974	Dffa	13347	1953.76	-0.138941	0.0476543	-2.9156	0.00355006	0.0395949
ENSMUSG00000021646	Mccc2	78038	793.632	0.11749	0.0403225	2.91375	0.00357118	0.0398092
ENSMUSG00000032846	Zswim6	67263	1281.05	-0.201658	0.0692169	-2.91342	0.00357497	0.0398302
ENSMUSG00000022089	Bin3	57784	443.953	0.160221	0.0549974	2.91325	0.00357689	0.0398303
ENSMUSG00000055633	Zfp580	68992	434.882	0.267972	0.0919933	2.91295	0.00358037	0.0398479
ENSMUSG00000022414	Tab1	66513	1086.3	0.184505	0.0633601	2.912	0.0035912	0.0399258
ENSMUSG00000039879	Heca	380629	1047.09	-0.19525	0.0670481	-2.91208	0.00359025	0.0399258
ENSMUSG00000043079	Synpo	104027	7868.23	-0.228197	0.0783702	-2.91178	0.00359377	0.0399331
ENSMUSG00000003970	Rpl8	26961	8467.75	0.221276	0.0760104	2.91113	0.00360126	0.0399525
ENSMUSG00000009112	Bcl2l13	94044	1920.53	-0.143823	0.0494016	-2.91129	0.00359937	0.0399525
ENSMUSG00000026436	Elk4	13714	1446.7	-0.139107	0.0477815	-2.91132	0.00359902	0.0399525
ENSMUSG00000055137	Sugct	192136	135.109	0.256839	0.0882392	2.91072	0.00360598	0.0399837
ENSMUSG00000024669	Cd5	12507	12.5015	0.701056	0.240868	2.91054	0.00360805	0.0399854
ENSMUSG00000018566	Slc2a4	20528	68.9924	0.432104	0.148535	2.90909	0.00362477	0.0401393
ENSMUSG00000020827	Mink1	50932	12128.5	-0.143737	0.0494117	-2.90897	0.00362617	0.0401393
ENSMUSG00000064120	Mocs1	56738	440.42	0.162972	0.0560265	2.90884	0.0036277	0.0401393
ENSMUSG00000049872	Calhm5	103511	186.344	0.246716	0.0848298	2.90836	0.00363326	0.0401795
ENSMUSG00000036564	Ndrg4	234593	70190.9	-0.148751	0.0511736	-2.9068	0.00365149	0.0403384
ENSMUSG00000085022	Gm5860	545641	12.5182	0.774559	0.266551	2.90586	0.00366245	0.040438
ENSMUSG00000003271	Sult2b1	54200	198.477	-0.327381	0.112687	-2.90522	0.00366991	0.040499
ENSMUSG00000067722	BC003965	214489	1080.43	0.135039	0.0465107	2.90339	0.00369143	0.0407149
ENSMUSG00000041479	Syt15	319508	58.7857	0.404439	0.13933	2.90273	0.00369921	0.0407693
ENSMUSG00000053286	Trmt1l	98685	1115.47	-0.104689	0.0360689	-2.90248	0.00370221	0.0407693
ENSMUSG00000069806	Cacng7	81904	5904.37	-0.144874	0.0499134	-2.90251	0.00370191	0.0407693
ENSMUSG00000039682	Lap3	66988	1893.52	0.16029	0.0552347	2.90198	0.00370814	0.0407701
ENSMUSG00000041679	Lrrc29	234684	122.162	0.354998	0.122326	2.90207	0.00370705	0.0407701
ENSMUSG00000102493	Gm8010	666262	87.5415	-0.322362	0.111074	-2.90222	0.00370529	0.0407701
ENSMUSG00000069588	Gm11733	432615	19.8218	0.681634	0.234901	2.9018	0.00371028	0.0407721
ENSMUSG00000022453	Naga	17939	793.047	0.143359	0.0494277	2.90037	0.00372718	0.0409015
ENSMUSG00000056602	Fry	320365	7277.25	-0.222194	0.0766049	-2.90052	0.0037255	0.0409015
ENSMUSG00000066975	Cryba4	12959	17.2384	0.605319	0.208708	2.90031	0.00372793	0.0409015
ENSMUSG00000036450	Hif1an	319594	2589.07	-0.112178	0.0387014	-2.89856	0.00374886	0.0410663
ENSMUSG00000036466	Megf11	214058	1567.52	0.139251	0.0480407	2.8986	0.00374829	0.0410663
ENSMUSG00000050188	Lsm10	116748	215.867	0.226376	0.0780971	2.89864	0.00374779	0.0410663
ENSMUSG00000059182	Skap2	54353	454.359	0.204549	0.0705938	2.89755	0.00376091	0.0411767
ENSMUSG00000019851	Perp	64058	203.122	0.290363	0.10026	2.89609	0.0037785	0.0413476
ENSMUSG00000063179	Pstk	214580	724.327	0.155597	0.0537469	2.89499	0.00379172	0.0414706
ENSMUSG00000048029	Eno4	226265	156.147	-0.220849	0.0763172	-2.89383	0.00380577	0.0416025
ENSMUSG00000020460	Rps27a	78294	8055.58	0.283847	0.0981694	2.8914	0.00383532	0.0419035
ENSMUSG00000006611	Hfe	15216	166.451	0.29983	0.10372	2.89076	0.00384308	0.0419664
ENSMUSG00000054893	Zfp667	384763	832.159	-0.158019	0.0546779	-2.89	0.00385237	0.0420458
ENSMUSG00000017692	Rhbdl3	246104	1080.31	-0.197438	0.0683451	-2.88884	0.00386663	0.0421794
ENSMUSG00000014668	Chfr	231600	1350.25	-0.0938365	0.032488	-2.88834	0.0038728	0.0422246
ENSMUSG00000051048	P4ha3	320452	318.84	0.463553	0.160541	2.88743	0.00388397	0.0423244
ENSMUSG00000052040	Klf13	50794	6800.04	-0.19615	0.0679562	-2.88641	0.00389658	0.0424396
ENSMUSG00000029196	Tada2b	231151	1246.63	-0.126813	0.0439373	-2.88622	0.00389895	0.0424433
ENSMUSG00000019832	Rab32	67844	70.8827	0.374674	0.129824	2.88602	0.00390148	0.0424486
ENSMUSG00000091449	Gm10269	100040823	739.519	0.34111	0.118201	2.88583	0.00390381	0.0424519
ENSMUSG00000070880	Gad1	14415	17006.6	-0.15832	0.054875	-2.88511	0.00391279	0.0425274
ENSMUSG00000041771	Slc24a4	238384	1437.22	-0.239232	0.0829268	-2.88486	0.00391588	0.0425388
ENSMUSG00000019731	Slc35e1	270066	2944.63	-0.106917	0.0370729	-2.88396	0.00392712	0.0426171
ENSMUSG00000034923	Ly6g6f	433099	30.5079	0.562772	0.19515	2.88379	0.00392921	0.0426171
ENSMUSG00000086567	Gm2830	100040543	436.93	0.316302	0.109677	2.88395	0.00392722	0.0426171
ENSMUSG00000078153	Psme2b	621823	264.31	0.220792	0.0765816	2.8831	0.00393788	0.042689
ENSMUSG00000053318	Slamf8	74748	19.7292	0.785164	0.272359	2.88283	0.00394116	0.0427023
ENSMUSG00000028584	Lrrc38	242735	80.7584	-0.269074	0.0933441	-2.88261	0.00394399	0.0427108
ENSMUSG00000032508	Myd88	17874	157.661	0.2683	0.0931213	2.88119	0.00396179	0.042837
ENSMUSG00000059401	Mamld1	333639	1695.21	-0.150923	0.052382	-2.8812	0.00396162	0.042837
ENSMUSG00000022416	Cacna1i	239556	5456.34	-0.209656	0.0727873	-2.8804	0.00397173	0.0429222
ENSMUSG00000038836	Agbl3	76223	383.774	0.221372	0.0768977	2.87879	0.00399208	0.0431198
ENSMUSG00000027540	Ptpn1	19246	2118.86	-0.162359	0.0564118	-2.8781	0.00400078	0.0431914
ENSMUSG00000044362	Ccdc89	70054	35.0179	0.380058	0.132088	2.87732	0.00401072	0.0432764
ENSMUSG00000032402	Smad3	17127	2745.36	-0.15815	0.0549818	-2.87642	0.0040222	0.0433743
ENSMUSG00000061436	Hipk2	15258	3875.95	-0.248554	0.0864153	-2.87628	0.00402394	0.0433743
ENSMUSG00000045275	Lca5l	385668	249.28	0.220543	0.0766882	2.87585	0.00402946	0.0434113
ENSMUSG00000070565	Rasal2	226525	5215.54	-0.178677	0.0621449	-2.87517	0.00403815	0.0434824
ENSMUSG00000025362	Rps26	27370	2533.91	0.329346	0.114617	2.87344	0.00406029	0.0436818
ENSMUSG00000029580	Actb	11461	31280.8	0.137771	0.0479472	2.8734	0.00406085	0.0436818
ENSMUSG00000039145	Camk1d	227541	6607.64	-0.150691	0.0524653	-2.87221	0.00407611	0.0438234
ENSMUSG00000027954	Efna1	13636	144.41	0.248108	0.0864032	2.87151	0.0040851	0.0438952
ENSMUSG00000082536	Gm13456	666531	6131.26	0.121459	0.0423008	2.87132	0.00408755	0.0438952
ENSMUSG00000085084	4930570G19Rik	329782	485.662	0.205912	0.0717161	2.87121	0.0040891	0.0438952
ENSMUSG00000058013	2021-09-11	52398	4383.23	-0.167847	0.0584682	-2.87074	0.00409511	0.0439372
ENSMUSG00000004798	Ulk2	29869	4949.13	-0.117091	0.0407972	-2.87008	0.0041037	0.0440068
ENSMUSG00000096942	Rps19-ps6	100503302	1874.91	0.283819	0.0989031	2.86966	0.0041091	0.044042
ENSMUSG00000046605	B3gntl1	210004	267.266	0.162758	0.0567309	2.86895	0.0041184	0.0441191
ENSMUSG00000035629	Rubcn	100502698	3912.55	-0.0940251	0.0327853	-2.86791	0.00413198	0.0442419
ENSMUSG00000069855	Slc47a2	380701	7.75386	1.01952	0.355572	2.86725	0.00414052	0.0443106
ENSMUSG00000079681	Zglp1	100009600	48.5288	-0.511586	0.178567	-2.86495	0.00417078	0.0446115
ENSMUSG00000037279	Ovol2	107586	175.188	-0.351978	0.122934	-2.86314	0.00419463	0.0448363
ENSMUSG00000039910	Cited2	17684	1244.76	-0.176079	0.0615011	-2.86303	0.00419609	0.0448363
ENSMUSG00000083394	Gm11703	108167871	2562.69	0.287654	0.100508	2.862	0.00420981	0.0449599
ENSMUSG00000020328	Nudcd2	52653	575.439	0.147973	0.0517398	2.85995	0.00423713	0.0452285
ENSMUSG00000019659	Ccdc12	72654	852.756	0.197155	0.0689415	2.85974	0.00423983	0.0452343
ENSMUSG00000020576	Nbas	71169	1936.53	-0.148583	0.0519799	-2.85847	0.00425687	0.0453693
ENSMUSG00000042246	Tmc7	209760	637.058	-0.26197	0.0916518	-2.85831	0.00425901	0.0453693
ENSMUSG00000090622	A930033H14Rik	320700	75.895	0.265575	0.0929099	2.85841	0.00425768	0.0453693
ENSMUSG00000047261	Gap43	14432	8859.64	0.183754	0.064295	2.85798	0.00426345	0.0453935
ENSMUSG00000001089	Luzp1	269593	4385.08	-0.191261	0.066939	-2.85725	0.00427335	0.0454691
ENSMUSG00000001604	Tcea3	21401	20.7519	0.571218	0.199927	2.85713	0.00427491	0.0454691
ENSMUSG00000032192	Gnb5	14697	3025.13	-0.168103	0.0588406	-2.85692	0.00427774	0.045476
ENSMUSG00000079363	Gbp4	17472	104.727	1.00187	0.350775	2.85617	0.00428792	0.0455402
ENSMUSG00000001150	Mcm3ap	54387	2748.39	-0.10383	0.0363591	-2.85567	0.00429463	0.0455841
ENSMUSG00000023106	Denr	68184	2095.99	0.14416	0.0504871	2.85538	0.00429851	0.0455841
ENSMUSG00000041673	Lrrc18	67580	28.7181	0.422674	0.148037	2.8552	0.00430099	0.0455841
ENSMUSG00000097059	Fam120aos	68128	335.818	0.160486	0.0562085	2.8552	0.004301	0.0455841
ENSMUSG00000020173	Cobl	12808	3860.81	-0.225782	0.0791099	-2.85402	0.00431692	0.0457296
ENSMUSG00000031138	F9	14071	9.69509	0.781303	0.273859	2.85294	0.00433164	0.045843
ENSMUSG00000049130	C5ar1	12273	29.6431	0.792364	0.277738	2.85291	0.00433202	0.045843
ENSMUSG00000041530	Ago1	236511	4186.03	-0.107792	0.0377913	-2.85229	0.00434059	0.0459104
ENSMUSG00000069874	Irgm2	54396	116.676	0.579879	0.203336	2.85183	0.00434683	0.0459531
ENSMUSG00000038949	Cnst	226744	2147.51	-0.106325	0.0372929	-2.85108	0.00435717	0.0460275
ENSMUSG00000039063	Echdc3	67856	31.4968	0.424478	0.148896	2.85083	0.00436047	0.0460275
ENSMUSG00000036533	Cdc42ep3	260409	475.561	-0.181241	0.0635846	-2.85039	0.00436658	0.0460686
ENSMUSG00000026069	Il1rl1	17082	16.1612	0.669436	0.234902	2.84986	0.00437386	0.0460989
ENSMUSG00000090258	Churc1	211151	197.253	0.189444	0.0664745	2.84987	0.00437364	0.0460989
ENSMUSG00000025964	Adam23	23792	7681.65	-0.122933	0.0431487	-2.84906	0.00438481	0.046191
ENSMUSG00000059479	B3gnt8	232984	30.1863	0.399059	0.140135	2.84767	0.0044041	0.04636
ENSMUSG00000073876	Gm13305	100042555	50.6877	-0.652081	0.228995	-2.84758	0.0044053	0.04636
ENSMUSG00000026946	Nmi	64685	103.344	0.27108	0.0952124	2.84711	0.00441177	0.0464047
ENSMUSG00000020253	Ppm1m	67905	765.59	0.364511	0.128099	2.84554	0.00443361	0.0465875
ENSMUSG00000067736	Gm10222	100142658	24651.4	0.496667	0.174538	2.84561	0.00443259	0.0465875
ENSMUSG00000100005	B130024G19Rik	434198	29.2014	0.404154	0.142062	2.84492	0.00444225	0.0466548
ENSMUSG00000055652	Klhl25	207952	424.103	0.163687	0.0575411	2.8447	0.00444534	0.0466638
ENSMUSG00000050312	Nsun3	106338	469.249	0.170621	0.0599947	2.84393	0.00445607	0.0467529
ENSMUSG00000052658	5830454E08Rik	76100	33.777	0.425795	0.149761	2.84316	0.00446683	0.0468187
ENSMUSG00000063018	2010204K13Rik	68355	472.691	0.229398	0.0806818	2.84325	0.00446566	0.0468187
ENSMUSG00000034751	Mast4	328329	2936.65	-0.179075	0.0629912	-2.84286	0.00447109	0.0468399
ENSMUSG00000027254	Map1a	17754	66549	-0.238894	0.0840603	-2.84193	0.00448412	0.0469293
ENSMUSG00000040632	Nrl	18185	25.5016	0.462759	0.162846	2.84169	0.00448749	0.0469411
ENSMUSG00000040370	Etfrf1	67636	777.64	0.182437	0.0642103	2.84125	0.00449376	0.0469831
ENSMUSG00000029206	Nsun7	70918	558.097	0.320401	0.112789	2.84072	0.00450115	0.0470368
ENSMUSG00000028653	Trit1	66966	637.077	0.112282	0.0395401	2.83971	0.00451549	0.0471591
ENSMUSG00000083061	Gm12191	666899	2824.01	0.282769	0.0995815	2.83957	0.00451738	0.0471591
ENSMUSG00000079083	Jrkl	77532	472.917	0.196106	0.0690668	2.83937	0.00452028	0.0471659
ENSMUSG00000090230	Gm16315	108167825	87.5836	-0.601798	0.211978	-2.83896	0.00452606	0.0472026
ENSMUSG00000029467	Atp2a2	11938	30646	-0.213079	0.0750789	-2.83807	0.00453869	0.0472972
ENSMUSG00000089716	Gm6264	621835	224.177	-0.329012	0.115931	-2.838	0.00453966	0.0472972
ENSMUSG00000020806	Rhbdf2	217344	53.5842	0.403618	0.14232	2.83599	0.00456834	0.0475559
ENSMUSG00000028651	Ppie	56031	355.128	0.198963	0.0701576	2.83594	0.00456905	0.0475559
ENSMUSG00000050856	Atp5k	11958	3162.92	0.258063	0.0910195	2.83525	0.00457904	0.0476362
ENSMUSG00000049281	Scn3b	235281	5561.16	-0.10258	0.0361898	-2.8345	0.00458981	0.0477245
ENSMUSG00000003752	Itpkc	233011	542.377	-0.164248	0.0579576	-2.83393	0.00459788	0.0477608
ENSMUSG00000010122	Slc47a1	67473	221.719	0.836849	0.295337	2.83354	0.00460352	0.0477956
ENSMUSG00000052151	Plpp2	50784	167.632	0.311404	0.109944	2.83237	0.00462041	0.047947
ENSMUSG00000033623	Pcgf3	69587	2235.75	-0.1146	0.0404677	-2.83189	0.00462737	0.0479955
ENSMUSG00000021003	Galc	14420	1227.45	0.107458	0.0379481	2.83172	0.00462987	0.0479976
ENSMUSG00000021061	Sptb	20741	11171.8	-0.181697	0.0641859	-2.83079	0.00464328	0.0481127
ENSMUSG00000019158	Tmem160	69094	972.67	0.370135	0.130795	2.82988	0.00465654	0.0482261
ENSMUSG00000067995	Gtf2f2	68705	449.823	0.162442	0.0574116	2.82944	0.00466302	0.0482693
ENSMUSG00000028033	Kcnq5	226922	3593.18	-0.174934	0.0618495	-2.82838	0.00467837	0.0483563
ENSMUSG00000028991	Mtor	56717	5580.87	-0.170999	0.0604555	-2.8285	0.00467663	0.0483563
ENSMUSG00000056941	Commd7	99311	1207.12	0.124372	0.0439707	2.82853	0.00467625	0.0483563
ENSMUSG00000006205	Htra1	56213	3727.13	-0.241526	0.0854195	-2.82753	0.00469083	0.0484611
ENSMUSG00000042426	Dhx29	218629	1222.49	-0.122568	0.0433651	-2.82641	0.0047073	0.0486072
ENSMUSG00000012429	Mplkip	66308	364.512	0.189568	0.0670826	2.82589	0.00471488	0.0486575
ENSMUSG00000034235	Usp54	78787	2775.36	-0.204876	0.0725029	-2.82576	0.00471683	0.0486575
ENSMUSG00000038855	Itpkb	320404	2071.55	0.220392	0.0780142	2.82502	0.00472778	0.0487463
ENSMUSG00000021690	Jmy	57748	2845.09	-0.144806	0.0512764	-2.82403	0.00474246	0.0488736
ENSMUSG00000031347	Cetn2	26370	1298.31	0.169311	0.0599974	2.82197	0.00477294	0.0491391
ENSMUSG00000026483	Fam129a	63913	153.08	0.324528	0.115023	2.82143	0.00478107	0.0491985
ENSMUSG00000027951	Adar	56417	9041.24	-0.120275	0.0426353	-2.82103	0.00478694	0.0492348
ENSMUSG00000082305	Gm2420	100039775	70.9805	-0.619251	0.219668	-2.81903	0.00481691	0.0494943
ENSMUSG00000063457	Rps15	20054	10536.8	0.297806	0.105661	2.81851	0.00482476	0.0495261
ENSMUSG00000026972	Arrdc1	215705	420.849	0.203307	0.0722102	2.81549	0.00487027	0.0499442
ENSMUSG00000046330	Rpl37a	19981	2217.57	0.255347	0.090754	2.81362	0.00489874	0.0501869
ENSMUSG00000080180	Gm17235	100416021	31.3723	-0.456789	0.162371	-2.81324	0.00490452	0.0502214
ENSMUSG00000043372	Hexim2	71059	401.082	0.216582	0.0769913	2.81307	0.00490704	0.0502226
ENSMUSG00000029420	Rimbp2	231760	4273.72	-0.221102	0.0786114	-2.81259	0.00491442	0.0502735
ENSMUSG00000037972	Snn	20621	8550.87	-0.119813	0.0426073	-2.81203	0.00492306	0.0503372
ENSMUSG00000041483	Zfp281	226442	1920.36	-0.167586	0.0595996	-2.81187	0.00492548	0.0503373
ENSMUSG00000062691	Cebpzos	68554	153.698	0.272948	0.0970776	2.81165	0.00492887	0.0503473
ENSMUSG00000020261	Slc36a1	215335	3420.3	-0.201584	0.0717021	-2.81142	0.00493239	0.0503586
ENSMUSG00000022390	Zc3h7b	20286	8102.82	-0.113007	0.0402039	-2.81085	0.00494105	0.0503991
ENSMUSG00000074283	Zfp109	56869	179.931	-0.307304	0.109328	-2.81084	0.00494118	0.0503991
ENSMUSG00000042548	Asxl1	228790	2771.39	-0.0830417	0.0295519	-2.81003	0.00495364	0.0505015
ENSMUSG00000074141	Il4i1	14204	133.916	0.272402	0.0970142	2.80786	0.00498725	0.0508193
ENSMUSG00000029063	Nadk	192185	2507.17	-0.101313	0.0360908	-2.80717	0.00499795	0.0508851
ENSMUSG00000050666	Vstm4	320736	144.112	0.384729	0.137054	2.80713	0.00499858	0.0508851
ENSMUSG00000026924	Sec16a	227648	3667.62	-0.141245	0.0503257	-2.80662	0.00500641	0.05094
ENSMUSG00000054293	P2ry10b	213438	12.5895	0.649961	0.231604	2.80635	0.00501063	0.0509581
ENSMUSG00000097788	Gm16596	100504467	73.4749	0.293404	0.104566	2.80591	0.00501743	0.0510024
ENSMUSG00000054342	Kcnn4	16534	13.3792	0.683854	0.243743	2.80564	0.00502169	0.0510209
ENSMUSG00000028860	Sytl1	269589	141.817	-0.586806	0.209226	-2.80465	0.00503712	0.0511356
ENSMUSG00000038451	Spsb2	14794	114.92	0.215583	0.0768776	2.80424	0.00504358	0.0511686
ENSMUSG00000002346	Slc25a42	73095	1810.52	-0.167764	0.0598354	-2.80376	0.00505112	0.0512202
ENSMUSG00000028115	Bnipl	171388	17.3579	-0.570916	0.203684	-2.80294	0.00506387	0.0512866
ENSMUSG00000048852	Gm12185	620913	9.72467	0.716626	0.255671	2.80292	0.00506426	0.0512866
ENSMUSG00000063935	Zar1	317755	6.89407	0.994266	0.354732	2.80287	0.00506504	0.0512866
ENSMUSG00000082292	Gm12250	631323	12.388	1.08942	0.38873	2.80251	0.00507061	0.0513181
ENSMUSG00000060257	Scrt2	545474	738.256	-0.245939	0.0877916	-2.8014	0.00508816	0.0514477
ENSMUSG00000021367	Edn1	13614	70.7541	0.445043	0.158901	2.80075	0.00509841	0.0515245
ENSMUSG00000035517	Tdrd7	100121	1598.92	-0.127258	0.0454482	-2.80006	0.00510935	0.0516055
ENSMUSG00000085371	Gm3160	100041140	10.6274	-0.759012	0.271083	-2.79993	0.00511137	0.0516055
ENSMUSG00000016194	Hsd11b1	15483	326.35	-0.308202	0.110125	-2.79866	0.00513152	0.051748
ENSMUSG00000076437	Selenoh	72657	501.615	0.233656	0.083491	2.79857	0.00513291	0.051748
ENSMUSG00000060924	Csmd1	94109	3587.76	-0.220699	0.0788869	-2.79766	0.00514744	0.0518694
ENSMUSG00000020713	Gh	14599	28.7725	3.88946	1.39063	2.7969	0.00515949	0.0519658
ENSMUSG00000026358	Rgs1	50778	8.8817	0.923621	0.330272	2.79655	0.00516518	0.0519672
ENSMUSG00000038612	Mcl1	17210	2999.68	-0.105518	0.0377352	-2.79627	0.00516959	0.0519672
ENSMUSG00000079259	Trim71	636931	38.849	-0.47981	0.171577	-2.79646	0.00516653	0.0519672
ENSMUSG00000002870	Mcm2	17216	172.428	0.245992	0.0880113	2.795	0.00518995	0.0521217
ENSMUSG00000022387	Brd1	223770	2291.99	-0.114317	0.0408985	-2.79513	0.00518782	0.0521217
ENSMUSG00000032495	Lrrc2	74249	68.6021	0.291101	0.104161	2.79471	0.00519459	0.0521432
[truncated: 30,572 more rows]
