# Supplementary material for: Microglia show differential transcriptomic response to Aβ peptide aggregates ex vivo and in vivo
Source: Life Sci Alliance. 2021 Jun 14;4(7):e202101108. doi: 10.26508/lsa.202101108 (PMC8321667; doi:10.26508/lsa.202101108)
Supplement: Supplementary file 46 [file LSA-2021-01108_TableS46.xlsx]

## Sheet: Sheet1
category	ontology	term	over_represented_pvalue	BHadjust	numDEInCat	numInCat	totalDEG	totalNum	enrichment
GO:0001730	MF	2'-5'-oligoadenylate synthetase activity	4.06165e-06	0.000191862	4	6	493	21152	28.6031
GO:0023026	MF	MHC class II protein complex binding	2.50995e-06	0.000122955	4	6	493	21152	28.6031
GO:0016175	MF	superoxide-generating NADPH oxidase activity	6.3764e-07	3.5665e-05	5	9	493	21152	23.8359
GO:0034987	MF	immunoglobulin receptor binding	2.49525e-05	0.000942952	4	9	493	21152	19.0687
GO:0004908	MF	interleukin-1 receptor activity	0.000409396	0.0112396	3	7	493	21152	18.3877
GO:0071723	MF	lipopeptide binding	0.000380606	0.0105393	3	7	493	21152	18.3877
GO:0050664	MF	oxidoreductase activity, acting on NAD(P)H, oxygen as acceptor	6.73528e-06	0.000302281	5	13	493	21152	16.5018
GO:0016176	MF	superoxide-generating NADPH oxidase activator activity	0.000615064	0.0157514	3	8	493	21152	16.0892
GO:0019864	MF	IgG binding	0.000431112	0.011679	3	8	493	21152	16.0892
GO:0019763	MF	immunoglobulin receptor activity	0.000392928	0.0108538	3	8	493	21152	16.0892
GO:0004859	MF	phospholipase inhibitor activity	0.00475962	0.0877933	2	6	493	21152	14.3016
GO:0019863	MF	IgE binding	0.00474573	0.0876089	2	6	493	21152	14.3016
GO:0050700	MF	CARD domain binding	0.000130609	0.00415351	4	12	493	21152	14.3016
GO:0045028	MF	G protein-coupled purinergic nucleotide receptor activity	0.000124214	0.00398992	4	12	493	21152	14.3016
GO:0023023	MF	MHC protein complex binding	8.64734e-05	0.00291071	4	12	493	21152	14.3016
GO:0046977	MF	TAP binding	0.00174603	0.0381902	3	11	493	21152	11.7013
GO:0097153	MF	cysteine-type endopeptidase activity involved in apoptotic process	0.00247294	0.051248	3	12	493	21152	10.7262
GO:0016505	MF	peptidase activator activity involved in apoptotic process	0.00211396	0.0450118	3	12	493	21152	10.7262
GO:0001614	MF	purinergic nucleotide receptor activity	7.80718e-05	0.00264374	5	20	493	21152	10.7262
GO:0016502	MF	nucleotide receptor activity	7.80718e-05	0.00264374	5	20	493	21152	10.7262
GO:0001848	MF	complement binding	9.59631e-05	0.00319664	5	22	493	21152	9.75106
GO:0035325	MF	Toll-like receptor binding	0.00270925	0.055531	3	14	493	21152	9.19386
GO:0001846	MF	opsonin binding	0.00423983	0.079643	3	15	493	21152	8.58093
GO:0051400	MF	BH domain binding	0.0031791	0.0635396	3	15	493	21152	8.58093
GO:0015929	MF	hexosaminidase activity	0.00549892	0.0981296	3	16	493	21152	8.04462
GO:0003950	MF	NAD+ ADP-ribosyltransferase activity	0.00159241	0.0356982	4	22	493	21152	7.80085
GO:0019865	MF	immunoglobulin binding	0.00114824	0.0273497	4	22	493	21152	7.80085
GO:0070566	MF	adenylyltransferase activity	0.000452569	0.0121432	5	28	493	21152	7.66155
GO:0043027	MF	cysteine-type endopeptidase inhibitor activity involved in apoptotic process	0.000346284	0.0097206	5	28	493	21152	7.66155
GO:0008009	MF	chemokine activity	5.47789e-06	0.000249839	7	40	493	21152	7.50832
GO:0140375	MF	immune receptor activity	8.96306e-11	9.73597e-09	18	113	493	21152	6.83437
GO:0016504	MF	peptidase activator activity	0.000732315	0.0184598	5	32	493	21152	6.70385
GO:0001530	MF	lipopolysaccharide binding	0.00226566	0.0477646	4	26	493	21152	6.60072
GO:0043028	MF	cysteine-type endopeptidase regulator activity involved in apoptotic process	0.000207065	0.00626921	6	39	493	21152	6.60072
GO:0042287	MF	MHC protein binding	0.00375508	0.0723504	4	29	493	21152	5.91788
GO:0043394	MF	proteoglycan binding	0.00161535	0.0361045	5	37	493	21152	5.79793
GO:0042379	MF	chemokine receptor binding	7.60053e-06	0.000335752	8	63	493	21152	5.44821
GO:0019956	MF	chemokine binding	0.00548348	0.0979316	4	32	493	21152	5.36308
GO:0004896	MF	cytokine receptor activity	2.21549e-06	0.000110701	12	96	493	21152	5.36308
GO:0001540	MF	amyloid-beta binding	0.000316473	0.00901887	7	58	493	21152	5.17815
GO:0048020	MF	CCR chemokine receptor binding	0.000340937	0.00959444	5	43	493	21152	4.98891
GO:0004715	MF	non-membrane spanning protein tyrosine kinase activity	0.00423859	0.079643	5	45	493	21152	4.76719
GO:0016763	MF	transferase activity, transferring pentosyl groups	0.00355105	0.0690704	5	45	493	21152	4.76719
GO:0019955	MF	cytokine binding	1.31006e-06	6.86638e-05	14	128	493	21152	4.6927
GO:0003823	MF	antigen binding	0.00134537	0.03109	6	57	493	21152	4.51628
GO:0048306	MF	calcium-dependent protein binding	0.000800987	0.0199981	7	71	493	21152	4.23004
GO:0004869	MF	cysteine-type endopeptidase inhibitor activity	0.00126611	0.0295048	6	62	493	21152	4.15206
GO:0003725	MF	double-stranded RNA binding	0.000802708	0.0199981	8	84	493	21152	4.08616
GO:0004197	MF	cysteine-type endopeptidase activity	0.000338228	0.00953015	9	95	493	21152	4.06465
GO:0038024	MF	cargo receptor activity	0.00173563	0.038008	7	74	493	21152	4.05855
GO:0005178	MF	integrin binding	0.000567021	0.0147474	10	122	493	21152	3.51678
GO:0061134	MF	peptidase regulator activity	1.36586e-06	7.12561e-05	18	232	493	21152	3.32881
GO:0005125	MF	cytokine activity	1.01131e-05	0.000426628	15	209	493	21152	3.07928
GO:0005126	MF	cytokine receptor binding	1.0688e-07	6.82726e-06	23	323	493	21152	3.05513
GO:0061135	MF	endopeptidase regulator activity	4.9111e-05	0.00176399	14	197	493	21152	3.04906
GO:0030414	MF	peptidase inhibitor activity	5.42272e-05	0.00190818	14	201	493	21152	2.98838
GO:0004866	MF	endopeptidase inhibitor activity	0.00012926	0.00412843	13	190	493	21152	2.93558
GO:0030246	MF	carbohydrate binding	0.000319974	0.00909559	16	268	493	21152	2.56147
GO:0003924	MF	GTPase activity	0.000287517	0.00828823	17	285	493	21152	2.55923
GO:0005539	MF	glycosaminoglycan binding	0.00559599	0.0995457	11	201	493	21152	2.34802
GO:0042277	MF	peptide binding	0.00229353	0.0481963	15	289	493	21152	2.22689
GO:0004857	MF	enzyme inhibitor activity	0.000283929	0.0082164	19	370	493	21152	2.20321
GO:0004175	MF	endopeptidase activity	0.00144683	0.0328937	20	437	493	21152	1.9636
GO:0030546	MF	signaling receptor activator activity	0.000121835	0.00393037	22	481	493	21152	1.96238
GO:0030545	MF	receptor regulator activity	0.000114094	0.00370724	23	508	493	21152	1.94253
GO:0008047	MF	enzyme activator activity	0.0032351	0.0644637	20	446	493	21152	1.92398
GO:0005102	MF	signaling receptor binding	1.94069e-09	1.71797e-07	71	1594	493	21152	1.91106
GO:0030234	MF	enzyme regulator activity	1.25379e-05	0.000509793	42	943	493	21152	1.91092
GO:0048018	MF	receptor ligand activity	0.000264235	0.00771601	21	475	493	21152	1.89684
GO:0008289	MF	lipid binding	0.00123626	0.0289253	30	736	493	21152	1.74883
GO:0098772	MF	molecular function regulator	7.43968e-08	4.86283e-06	69	1699	493	21152	1.74245
GO:0044877	MF	protein-containing complex binding	9.71786e-05	0.00323234	49	1232	493	21152	1.70644
GO:0042802	MF	identical protein binding	1.90364e-05	0.000739262	70	1869	493	21152	1.60692
GO:0046983	MF	protein dimerization activity	0.00334523	0.0651798	47	1386	493	21152	1.45492
GO:0005515	MF	protein binding	1.4296e-10	1.50913e-08	261	8689	493	21152	1.28877
GO:0005488	MF	binding	1.37408e-06	7.15189e-05	333	12816	493	21152	1.1148
