# Supplementary material for: Microglia show differential transcriptomic response to Aβ peptide aggregates ex vivo and in vivo
Source: Life Sci Alliance. 2021 Jun 14;4(7):e202101108. doi: 10.26508/lsa.202101108 (PMC8321667; doi:10.26508/lsa.202101108)
Supplement: Supplementary file 48 [file LSA-2021-01108_TableS48.xlsx]

## Sheet: Sheet1
category	pathway_name	over_represented_pvalue	BHadjust	numDEInCat	numInCat	totalDEG	totalNum	enrichment
5150	Staphylococcus aureus infection	7.62633e-11	1.71592e-08	14	50	493	6309	3.5832
531	Glycosaminoglycan degradation	0.000423905	0.0037778	5	21	493	6309	3.04694
5140	Leishmaniasis	3.89848e-09	2.92386e-07	14	64	493	6309	2.79938
5310	Asthma	0.000193433	0.00206633	5	23	493	6309	2.78199
603	Glycosphingolipid biosynthesis - globo and isoglobo series	0.0103862	0.0667685	3	15	493	6309	2.55943
4672	Intestinal immune network for IgA production	0.000193716	0.00206633	7	43	493	6309	2.08326
4610	Complement and coagulation cascades	2.00105e-06	6.43195e-05	12	75	493	6309	2.04755
5332	Graft-versus-host disease	6.85501e-05	0.00102825	8	51	493	6309	2.0074
4620	Toll-like receptor signaling pathway	1.48112e-07	5.5542e-06	15	101	493	6309	1.90057
4380	Osteoclast differentiation	8.11924e-08	3.65366e-06	17	116	493	6309	1.87545
5020	Prion disease	0.00354028	0.0274677	5	35	493	6309	1.82817
5330	Allograft rejection	0.00035373	0.00331622	7	49	493	6309	1.82817
4940	Type I diabetes mellitus	0.000152599	0.00180709	8	56	493	6309	1.82817
4145	Phagosome	5.43277e-10	6.11186e-08	23	167	493	6309	1.76248
5323	Rheumatoid arthritis	1.99438e-05	0.000448736	11	81	493	6309	1.73789
4612	Antigen processing and presentation	4.75302e-05	0.000862503	10	74	493	6309	1.72935
4662	B cell receptor signaling pathway	0.000109474	0.00144892	10	75	493	6309	1.70629
5322	Systemic lupus erythematosus	3.24212e-06	9.11848e-05	11	85	493	6309	1.6561
4640	Hematopoietic cell lineage	0.000129734	0.00162168	10	81	493	6309	1.5799
5142	Chagas disease	4.98335e-05	0.000862503	12	100	493	6309	1.53566
5416	Viral myocarditis	0.000209608	0.00206633	10	85	493	6309	1.50555
4650	Natural killer cell mediated cytotoxicity	6.33943e-06	0.000158486	14	120	493	6309	1.493
4666	Fc gamma R-mediated phagocytosis	0.000436546	0.0037778	10	88	493	6309	1.45422
5320	Autoimmune thyroid disease	0.00106695	0.00889127	7	64	493	6309	1.39969
4623	Cytosolic DNA-sensing pathway	0.00284833	0.0228883	6	55	493	6309	1.39605
4621	NOD-like receptor signaling pathway	0.0076837	0.0523889	6	56	493	6309	1.37112
4142	Lysosome	0.000100718	0.00141635	13	122	493	6309	1.36363
520	Amino sugar and nucleotide sugar metabolism	0.0143859	0.0851796	5	47	493	6309	1.3614
4514	Cell adhesion molecules	2.62577e-05	0.000537088	15	145	493	6309	1.32384
4060	Cytokine-cytokine receptor interaction	1.19606e-08	6.72784e-07	25	243	493	6309	1.31658
4670	Leukocyte transendothelial migration	0.000211225	0.00206633	12	118	493	6309	1.30141
4210	Apoptosis	0.00468676	0.0351507	8	85	493	6309	1.20444
4062	Chemokine signaling pathway	6.39416e-05	0.00102763	16	177	493	6309	1.15681
4664	Fc epsilon RI signaling pathway	0.00917447	0.0607134	7	79	493	6309	1.13393
4622	RIG-I-like receptor signaling pathway	0.0115427	0.0718362	6	69	493	6309	1.1128
5145	Toxoplasmosis	0.00528232	0.0383394	10	126	493	6309	1.01565
