# Supplementary material for: Microglia show differential transcriptomic response to Aβ peptide aggregates ex vivo and in vivo
Source: Life Sci Alliance. 2021 Jun 14;4(7):e202101108. doi: 10.26508/lsa.202101108 (PMC8321667; doi:10.26508/lsa.202101108)
Supplement: Supplementary file 49 [file LSA-2021-01108_TableS49.xlsx]

## Sheet: Sheet1
category	pathway_name	over_represented_pvalue	BHadjust	numDEInCat	numInCat	totalDEG	totalNum	enrichment
4380	Osteoclast differentiation	0.000191627	0.0215581	5	116	103	6309	2.64019
4010	MAPK signaling pathway	2.33896e-05	0.00526266	8	267	103	6309	1.83528
